# Supplementary material for: Signals from the deep: Spatial and temporal acoustic occurrence of beaked whales off western Ireland
Source: PLoS One. 2018 Jun 21;13(6):e0199431. doi: 10.1371/journal.pone.0199431 (PMC6013249; doi:10.1371/journal.pone.0199431)
Supplement: S1 Dataset — (CSV) [file pone.0199431.s001.csv]

Time	File	NBW clicks	Cuviers clicks
01/08/2015 0:02	AMAR379.9.20150801T000223Z.wav_chan0.xml	0	0
01/08/2015 0:10	AMAR379.9.20150801T001023Z.wav_chan0.xml	0	0
01/08/2015 0:18	AMAR379.9.20150801T001823Z.wav_chan0.xml	0	0
01/08/2015 0:26	AMAR379.9.20150801T002623Z.wav_chan0.xml	0	0
01/08/2015 0:34	AMAR379.9.20150801T003423Z.wav_chan0.xml	0	0
01/08/2015 0:42	AMAR379.9.20150801T004223Z.wav_chan0.xml	0	0
01/08/2015 0:50	AMAR379.9.20150801T005023Z.wav_chan0.xml	0	0
01/08/2015 0:58	AMAR379.9.20150801T005823Z.wav_chan0.xml	0	0
01/08/2015 1:06	AMAR379.9.20150801T010623Z.wav_chan0.xml	0	0
01/08/2015 1:14	AMAR379.9.20150801T011423Z.wav_chan0.xml	0	0
01/08/2015 1:22	AMAR379.9.20150801T012223Z.wav_chan0.xml	0	0
01/08/2015 1:30	AMAR379.9.20150801T013023Z.wav_chan0.xml	0	0
01/08/2015 1:38	AMAR379.9.20150801T013823Z.wav_chan0.xml	0	0
01/08/2015 1:46	AMAR379.9.20150801T014623Z.wav_chan0.xml	0	0
01/08/2015 1:54	AMAR379.9.20150801T015423Z.wav_chan0.xml	0	0
01/08/2015 2:02	AMAR379.9.20150801T020223Z.wav_chan0.xml	0	0
01/08/2015 2:10	AMAR379.9.20150801T021023Z.wav_chan0.xml	0	0
01/08/2015 2:18	AMAR379.9.20150801T021823Z.wav_chan0.xml	0	0
01/08/2015 2:26	AMAR379.9.20150801T022623Z.wav_chan0.xml	0	0
01/08/2015 2:34	AMAR379.9.20150801T023423Z.wav_chan0.xml	0	0
01/08/2015 2:42	AMAR379.9.20150801T024223Z.wav_chan0.xml	0	0
01/08/2015 2:50	AMAR379.9.20150801T025023Z.wav_chan0.xml	0	0
01/08/2015 2:58	AMAR379.9.20150801T025823Z.wav_chan0.xml	0	0
01/08/2015 3:06	AMAR379.9.20150801T030623Z.wav_chan0.xml	0	0
01/08/2015 3:14	AMAR379.9.20150801T031423Z.wav_chan0.xml	1	0
01/08/2015 3:22	AMAR379.9.20150801T032223Z.wav_chan0.xml	0	0
01/08/2015 3:30	AMAR379.9.20150801T033023Z.wav_chan0.xml	0	0
01/08/2015 3:38	AMAR379.9.20150801T033823Z.wav_chan0.xml	0	0
01/08/2015 3:46	AMAR379.9.20150801T034623Z.wav_chan0.xml	0	0
01/08/2015 3:54	AMAR379.9.20150801T035423Z.wav_chan0.xml	0	0
01/08/2015 4:02	AMAR379.9.20150801T040223Z.wav_chan0.xml	0	0
01/08/2015 4:10	AMAR379.9.20150801T041023Z.wav_chan0.xml	1	2
01/08/2015 4:18	AMAR379.9.20150801T041823Z.wav_chan0.xml	0	0
01/08/2015 4:26	AMAR379.9.20150801T042623Z.wav_chan0.xml	0	0
01/08/2015 4:34	AMAR379.9.20150801T043423Z.wav_chan0.xml	0	0
01/08/2015 4:42	AMAR379.9.20150801T044223Z.wav_chan0.xml	0	0
01/08/2015 4:50	AMAR379.9.20150801T045023Z.wav_chan0.xml	0	0
01/08/2015 4:58	AMAR379.9.20150801T045823Z.wav_chan0.xml	0	0
01/08/2015 5:06	AMAR379.9.20150801T050623Z.wav_chan0.xml	0	0
01/08/2015 5:14	AMAR379.9.20150801T051423Z.wav_chan0.xml	0	0
01/08/2015 5:22	AMAR379.9.20150801T052223Z.wav_chan0.xml	0	0
01/08/2015 5:30	AMAR379.9.20150801T053023Z.wav_chan0.xml	0	0
01/08/2015 5:38	AMAR379.9.20150801T053823Z.wav_chan0.xml	0	0
01/08/2015 5:46	AMAR379.9.20150801T054623Z.wav_chan0.xml	0	0
01/08/2015 5:54	AMAR379.9.20150801T055423Z.wav_chan0.xml	0	0
01/08/2015 6:02	AMAR379.9.20150801T060223Z.wav_chan0.xml	0	0
01/08/2015 6:10	AMAR379.9.20150801T061023Z.wav_chan0.xml	0	0
01/08/2015 6:18	AMAR379.9.20150801T061823Z.wav_chan0.xml	0	0
01/08/2015 6:26	AMAR379.9.20150801T062623Z.wav_chan0.xml	0	0
01/08/2015 6:34	AMAR379.9.20150801T063423Z.wav_chan0.xml	0	0
01/08/2015 6:42	AMAR379.9.20150801T064223Z.wav_chan0.xml	0	0
01/08/2015 6:50	AMAR379.9.20150801T065023Z.wav_chan0.xml	0	0
01/08/2015 6:58	AMAR379.9.20150801T065823Z.wav_chan0.xml	0	0
01/08/2015 7:06	AMAR379.9.20150801T070623Z.wav_chan0.xml	0	0
01/08/2015 7:14	AMAR379.9.20150801T071423Z.wav_chan0.xml	0	0
01/08/2015 7:22	AMAR379.9.20150801T072223Z.wav_chan0.xml	0	0
01/08/2015 7:30	AMAR379.9.20150801T073023Z.wav_chan0.xml	0	0
01/08/2015 7:38	AMAR379.9.20150801T073823Z.wav_chan0.xml	0	0
01/08/2015 7:46	AMAR379.9.20150801T074623Z.wav_chan0.xml	0	0
01/08/2015 7:54	AMAR379.9.20150801T075423Z.wav_chan0.xml	0	0
01/08/2015 8:02	AMAR379.9.20150801T080223Z.wav_chan0.xml	0	0
01/08/2015 8:10	AMAR379.9.20150801T081023Z.wav_chan0.xml	0	0
01/08/2015 8:18	AMAR379.9.20150801T081823Z.wav_chan0.xml	0	0
01/08/2015 8:26	AMAR379.9.20150801T082623Z.wav_chan0.xml	0	0
01/08/2015 8:34	AMAR379.9.20150801T083423Z.wav_chan0.xml	0	0
01/08/2015 8:42	AMAR379.9.20150801T084223Z.wav_chan0.xml	0	0
01/08/2015 8:50	AMAR379.9.20150801T085023Z.wav_chan0.xml	0	0
01/08/2015 8:58	AMAR379.9.20150801T085823Z.wav_chan0.xml	0	0
01/08/2015 9:06	AMAR379.9.20150801T090623Z.wav_chan0.xml	0	0
01/08/2015 9:14	AMAR379.9.20150801T091423Z.wav_chan0.xml	0	0
01/08/2015 9:22	AMAR379.9.20150801T092223Z.wav_chan0.xml	0	0
01/08/2015 9:30	AMAR379.9.20150801T093023Z.wav_chan0.xml	0	0
01/08/2015 9:38	AMAR379.9.20150801T093823Z.wav_chan0.xml	0	0
01/08/2015 9:46	AMAR379.9.20150801T094623Z.wav_chan0.xml	0	0
01/08/2015 9:54	AMAR379.9.20150801T095423Z.wav_chan0.xml	0	0
01/08/2015 10:02	AMAR379.9.20150801T100223Z.wav_chan0.xml	0	0
01/08/2015 10:10	AMAR379.9.20150801T101023Z.wav_chan0.xml	0	0
01/08/2015 10:18	AMAR379.9.20150801T101823Z.wav_chan0.xml	0	0
01/08/2015 10:26	AMAR379.9.20150801T102623Z.wav_chan0.xml	0	0
01/08/2015 10:34	AMAR379.9.20150801T103423Z.wav_chan0.xml	0	0
01/08/2015 10:42	AMAR379.9.20150801T104223Z.wav_chan0.xml	0	0
01/08/2015 10:50	AMAR379.9.20150801T105023Z.wav_chan0.xml	0	0
01/08/2015 10:58	AMAR379.9.20150801T105823Z.wav_chan0.xml	0	0
01/08/2015 11:06	AMAR379.9.20150801T110623Z.wav_chan0.xml	0	0
01/08/2015 11:14	AMAR379.9.20150801T111423Z.wav_chan0.xml	0	0
01/08/2015 11:22	AMAR379.9.20150801T112223Z.wav_chan0.xml	0	0
01/08/2015 11:30	AMAR379.9.20150801T113023Z.wav_chan0.xml	0	0
01/08/2015 11:38	AMAR379.9.20150801T113823Z.wav_chan0.xml	0	0
01/08/2015 11:46	AMAR379.9.20150801T114623Z.wav_chan0.xml	0	0
01/08/2015 11:54	AMAR379.9.20150801T115423Z.wav_chan0.xml	0	0
01/08/2015 12:02	AMAR379.9.20150801T120223Z.wav_chan0.xml	0	0
01/08/2015 12:10	AMAR379.9.20150801T121023Z.wav_chan0.xml	0	0
01/08/2015 12:18	AMAR379.9.20150801T121823Z.wav_chan0.xml	0	0
01/08/2015 12:26	AMAR379.9.20150801T122623Z.wav_chan0.xml	0	0
01/08/2015 12:34	AMAR379.9.20150801T123423Z.wav_chan0.xml	0	0
01/08/2015 12:42	AMAR379.9.20150801T124223Z.wav_chan0.xml	0	0
01/08/2015 12:50	AMAR379.9.20150801T125023Z.wav_chan0.xml	0	0
01/08/2015 12:58	AMAR379.9.20150801T125823Z.wav_chan0.xml	0	0
01/08/2015 13:06	AMAR379.9.20150801T130623Z.wav_chan0.xml	0	0
01/08/2015 13:14	AMAR379.9.20150801T131423Z.wav_chan0.xml	0	0
01/08/2015 13:22	AMAR379.9.20150801T132223Z.wav_chan0.xml	0	0
01/08/2015 13:30	AMAR379.9.20150801T133023Z.wav_chan0.xml	0	0
01/08/2015 13:38	AMAR379.9.20150801T133823Z.wav_chan0.xml	0	0
01/08/2015 13:46	AMAR379.9.20150801T134623Z.wav_chan0.xml	0	0
01/08/2015 13:54	AMAR379.9.20150801T135423Z.wav_chan0.xml	0	0
01/08/2015 14:02	AMAR379.9.20150801T140223Z.wav_chan0.xml	0	0
01/08/2015 14:10	AMAR379.9.20150801T141023Z.wav_chan0.xml	0	0
01/08/2015 14:18	AMAR379.9.20150801T141823Z.wav_chan0.xml	0	0
01/08/2015 14:26	AMAR379.9.20150801T142623Z.wav_chan0.xml	0	0
01/08/2015 14:34	AMAR379.9.20150801T143423Z.wav_chan0.xml	0	0
01/08/2015 14:42	AMAR379.9.20150801T144223Z.wav_chan0.xml	0	0
01/08/2015 14:50	AMAR379.9.20150801T145023Z.wav_chan0.xml	0	0
01/08/2015 14:58	AMAR379.9.20150801T145823Z.wav_chan0.xml	0	0
01/08/2015 15:06	AMAR379.9.20150801T150623Z.wav_chan0.xml	0	0
01/08/2015 15:14	AMAR379.9.20150801T151423Z.wav_chan0.xml	0	0
01/08/2015 15:22	AMAR379.9.20150801T152223Z.wav_chan0.xml	0	0
01/08/2015 15:30	AMAR379.9.20150801T153023Z.wav_chan0.xml	0	0
01/08/2015 15:38	AMAR379.9.20150801T153823Z.wav_chan0.xml	0	0
01/08/2015 15:46	AMAR379.9.20150801T154623Z.wav_chan0.xml	0	0
01/08/2015 15:54	AMAR379.9.20150801T155423Z.wav_chan0.xml	0	0
01/08/2015 16:02	AMAR379.9.20150801T160223Z.wav_chan0.xml	0	0
01/08/2015 16:10	AMAR379.9.20150801T161023Z.wav_chan0.xml	0	0
01/08/2015 16:18	AMAR379.9.20150801T161823Z.wav_chan0.xml	0	0
01/08/2015 16:26	AMAR379.9.20150801T162623Z.wav_chan0.xml	0	0
01/08/2015 16:34	AMAR379.9.20150801T163423Z.wav_chan0.xml	0	0
01/08/2015 16:42	AMAR379.9.20150801T164223Z.wav_chan0.xml	0	0
01/08/2015 16:50	AMAR379.9.20150801T165023Z.wav_chan0.xml	0	0
01/08/2015 16:58	AMAR379.9.20150801T165823Z.wav_chan0.xml	0	0
01/08/2015 17:06	AMAR379.9.20150801T170623Z.wav_chan0.xml	0	0
01/08/2015 17:14	AMAR379.9.20150801T171423Z.wav_chan0.xml	0	0
01/08/2015 17:22	AMAR379.9.20150801T172223Z.wav_chan0.xml	0	0
01/08/2015 17:30	AMAR379.9.20150801T173023Z.wav_chan0.xml	0	0
01/08/2015 17:38	AMAR379.9.20150801T173823Z.wav_chan0.xml	0	0
01/08/2015 17:46	AMAR379.9.20150801T174623Z.wav_chan0.xml	0	0
01/08/2015 17:54	AMAR379.9.20150801T175423Z.wav_chan0.xml	0	0
01/08/2015 18:02	AMAR379.9.20150801T180223Z.wav_chan0.xml	0	0
01/08/2015 18:10	AMAR379.9.20150801T181023Z.wav_chan0.xml	0	0
01/08/2015 18:18	AMAR379.9.20150801T181823Z.wav_chan0.xml	0	0
01/08/2015 18:26	AMAR379.9.20150801T182623Z.wav_chan0.xml	0	0
01/08/2015 18:34	AMAR379.9.20150801T183423Z.wav_chan0.xml	0	0
01/08/2015 18:42	AMAR379.9.20150801T184223Z.wav_chan0.xml	0	0
01/08/2015 18:50	AMAR379.9.20150801T185023Z.wav_chan0.xml	0	0
01/08/2015 18:58	AMAR379.9.20150801T185823Z.wav_chan0.xml	0	0
01/08/2015 19:06	AMAR379.9.20150801T190623Z.wav_chan0.xml	0	0
01/08/2015 19:14	AMAR379.9.20150801T191423Z.wav_chan0.xml	0	0
01/08/2015 19:22	AMAR379.9.20150801T192223Z.wav_chan0.xml	0	0
01/08/2015 19:30	AMAR379.9.20150801T193023Z.wav_chan0.xml	0	0
01/08/2015 19:38	AMAR379.9.20150801T193823Z.wav_chan0.xml	0	0
01/08/2015 19:46	AMAR379.9.20150801T194623Z.wav_chan0.xml	0	0
01/08/2015 19:54	AMAR379.9.20150801T195423Z.wav_chan0.xml	0	0
01/08/2015 20:02	AMAR379.9.20150801T200223Z.wav_chan0.xml	0	0
01/08/2015 20:10	AMAR379.9.20150801T201023Z.wav_chan0.xml	0	0
01/08/2015 20:18	AMAR379.9.20150801T201823Z.wav_chan0.xml	0	0
01/08/2015 20:26	AMAR379.9.20150801T202623Z.wav_chan0.xml	0	0
01/08/2015 20:34	AMAR379.9.20150801T203423Z.wav_chan0.xml	0	0
01/08/2015 20:42	AMAR379.9.20150801T204223Z.wav_chan0.xml	0	0
01/08/2015 20:50	AMAR379.9.20150801T205023Z.wav_chan0.xml	0	0
01/08/2015 20:58	AMAR379.9.20150801T205823Z.wav_chan0.xml	0	0
01/08/2015 21:06	AMAR379.9.20150801T210623Z.wav_chan0.xml	0	0
01/08/2015 21:14	AMAR379.9.20150801T211423Z.wav_chan0.xml	0	0
01/08/2015 21:22	AMAR379.9.20150801T212223Z.wav_chan0.xml	1	0
01/08/2015 21:30	AMAR379.9.20150801T213023Z.wav_chan0.xml	0	0
01/08/2015 21:38	AMAR379.9.20150801T213823Z.wav_chan0.xml	0	0
01/08/2015 21:46	AMAR379.9.20150801T214623Z.wav_chan0.xml	0	0
01/08/2015 21:54	AMAR379.9.20150801T215423Z.wav_chan0.xml	0	0
01/08/2015 22:02	AMAR379.9.20150801T220223Z.wav_chan0.xml	0	0
01/08/2015 22:10	AMAR379.9.20150801T221023Z.wav_chan0.xml	0	0
01/08/2015 22:18	AMAR379.9.20150801T221823Z.wav_chan0.xml	0	0
01/08/2015 22:26	AMAR379.9.20150801T222623Z.wav_chan0.xml	0	0
01/08/2015 22:34	AMAR379.9.20150801T223423Z.wav_chan0.xml	0	0
01/08/2015 22:42	AMAR379.9.20150801T224223Z.wav_chan0.xml	0	0
01/08/2015 22:50	AMAR379.9.20150801T225023Z.wav_chan0.xml	0	0
01/08/2015 22:58	AMAR379.9.20150801T225823Z.wav_chan0.xml	0	0
01/08/2015 23:06	AMAR379.9.20150801T230623Z.wav_chan0.xml	0	0
01/08/2015 23:14	AMAR379.9.20150801T231423Z.wav_chan0.xml	0	0
01/08/2015 23:22	AMAR379.9.20150801T232223Z.wav_chan0.xml	0	0
01/08/2015 23:30	AMAR379.9.20150801T233023Z.wav_chan0.xml	0	0
01/08/2015 23:38	AMAR379.9.20150801T233823Z.wav_chan0.xml	0	0
01/08/2015 23:46	AMAR379.9.20150801T234623Z.wav_chan0.xml	0	0
01/08/2015 23:54	AMAR379.9.20150801T235423Z.wav_chan0.xml	0	0
01/07/2015 0:02	AMAR379.9.20150701T000223Z.wav_chan0.xml	0	0
01/07/2015 0:10	AMAR379.9.20150701T001023Z.wav_chan0.xml	0	0
01/07/2015 0:18	AMAR379.9.20150701T001823Z.wav_chan0.xml	0	0
01/07/2015 0:26	AMAR379.9.20150701T002623Z.wav_chan0.xml	0	0
01/07/2015 0:34	AMAR379.9.20150701T003423Z.wav_chan0.xml	0	0
01/07/2015 0:42	AMAR379.9.20150701T004223Z.wav_chan0.xml	0	0
01/07/2015 0:50	AMAR379.9.20150701T005023Z.wav_chan0.xml	0	0
01/07/2015 0:58	AMAR379.9.20150701T005823Z.wav_chan0.xml	0	0
01/07/2015 1:06	AMAR379.9.20150701T010623Z.wav_chan0.xml	0	0
01/07/2015 1:14	AMAR379.9.20150701T011423Z.wav_chan0.xml	0	0
01/07/2015 1:22	AMAR379.9.20150701T012223Z.wav_chan0.xml	0	0
01/07/2015 1:30	AMAR379.9.20150701T013023Z.wav_chan0.xml	0	0
01/07/2015 1:38	AMAR379.9.20150701T013823Z.wav_chan0.xml	0	0
01/07/2015 1:46	AMAR379.9.20150701T014623Z.wav_chan0.xml	0	0
01/07/2015 1:54	AMAR379.9.20150701T015423Z.wav_chan0.xml	0	0
01/07/2015 2:02	AMAR379.9.20150701T020223Z.wav_chan0.xml	0	0
01/07/2015 2:10	AMAR379.9.20150701T021023Z.wav_chan0.xml	0	0
01/07/2015 2:18	AMAR379.9.20150701T021823Z.wav_chan0.xml	0	0
01/07/2015 2:26	AMAR379.9.20150701T022623Z.wav_chan0.xml	0	0
01/07/2015 2:34	AMAR379.9.20150701T023423Z.wav_chan0.xml	0	0
01/07/2015 2:42	AMAR379.9.20150701T024223Z.wav_chan0.xml	0	0
01/07/2015 2:50	AMAR379.9.20150701T025023Z.wav_chan0.xml	0	0
01/07/2015 2:58	AMAR379.9.20150701T025823Z.wav_chan0.xml	0	0
01/07/2015 3:06	AMAR379.9.20150701T030623Z.wav_chan0.xml	0	0
01/07/2015 3:14	AMAR379.9.20150701T031423Z.wav_chan0.xml	0	0
01/07/2015 3:22	AMAR379.9.20150701T032223Z.wav_chan0.xml	0	0
01/07/2015 3:30	AMAR379.9.20150701T033023Z.wav_chan0.xml	0	0
01/07/2015 3:38	AMAR379.9.20150701T033823Z.wav_chan0.xml	0	0
01/07/2015 3:46	AMAR379.9.20150701T034623Z.wav_chan0.xml	0	0
01/07/2015 3:54	AMAR379.9.20150701T035423Z.wav_chan0.xml	0	0
01/07/2015 4:02	AMAR379.9.20150701T040223Z.wav_chan0.xml	0	0
01/07/2015 4:10	AMAR379.9.20150701T041023Z.wav_chan0.xml	0	0
01/07/2015 4:18	AMAR379.9.20150701T041823Z.wav_chan0.xml	0	0
01/07/2015 4:26	AMAR379.9.20150701T042623Z.wav_chan0.xml	0	0
01/07/2015 4:34	AMAR379.9.20150701T043423Z.wav_chan0.xml	0	0
01/07/2015 4:42	AMAR379.9.20150701T044223Z.wav_chan0.xml	0	0
01/07/2015 4:50	AMAR379.9.20150701T045023Z.wav_chan0.xml	0	0
01/07/2015 4:58	AMAR379.9.20150701T045823Z.wav_chan0.xml	0	0
01/07/2015 5:06	AMAR379.9.20150701T050623Z.wav_chan0.xml	0	0
01/07/2015 5:14	AMAR379.9.20150701T051423Z.wav_chan0.xml	0	0
01/07/2015 5:22	AMAR379.9.20150701T052223Z.wav_chan0.xml	0	0
01/07/2015 5:30	AMAR379.9.20150701T053023Z.wav_chan0.xml	0	0
01/07/2015 5:38	AMAR379.9.20150701T053823Z.wav_chan0.xml	0	0
01/07/2015 5:46	AMAR379.9.20150701T054623Z.wav_chan0.xml	0	0
01/07/2015 5:54	AMAR379.9.20150701T055423Z.wav_chan0.xml	0	0
01/07/2015 6:02	AMAR379.9.20150701T060223Z.wav_chan0.xml	0	0
01/07/2015 6:10	AMAR379.9.20150701T061023Z.wav_chan0.xml	0	0
01/07/2015 6:18	AMAR379.9.20150701T061823Z.wav_chan0.xml	0	0
01/07/2015 6:26	AMAR379.9.20150701T062623Z.wav_chan0.xml	0	0
01/07/2015 6:34	AMAR379.9.20150701T063423Z.wav_chan0.xml	0	0
01/07/2015 6:42	AMAR379.9.20150701T064223Z.wav_chan0.xml	0	0
01/07/2015 6:50	AMAR379.9.20150701T065023Z.wav_chan0.xml	0	0
01/07/2015 6:58	AMAR379.9.20150701T065823Z.wav_chan0.xml	0	0
01/07/2015 7:06	AMAR379.9.20150701T070623Z.wav_chan0.xml	0	0
01/07/2015 7:14	AMAR379.9.20150701T071423Z.wav_chan0.xml	0	0
01/07/2015 7:22	AMAR379.9.20150701T072223Z.wav_chan0.xml	0	0
01/07/2015 7:30	AMAR379.9.20150701T073023Z.wav_chan0.xml	0	0
01/07/2015 7:38	AMAR379.9.20150701T073823Z.wav_chan0.xml	0	0
01/07/2015 7:46	AMAR379.9.20150701T074623Z.wav_chan0.xml	0	0
01/07/2015 7:54	AMAR379.9.20150701T075423Z.wav_chan0.xml	0	0
01/07/2015 8:02	AMAR379.9.20150701T080223Z.wav_chan0.xml	0	0
01/07/2015 8:10	AMAR379.9.20150701T081023Z.wav_chan0.xml	0	0
01/07/2015 8:18	AMAR379.9.20150701T081823Z.wav_chan0.xml	0	0
01/07/2015 8:26	AMAR379.9.20150701T082623Z.wav_chan0.xml	0	0
01/07/2015 8:34	AMAR379.9.20150701T083423Z.wav_chan0.xml	0	0
01/07/2015 8:42	AMAR379.9.20150701T084223Z.wav_chan0.xml	0	0
01/07/2015 8:50	AMAR379.9.20150701T085023Z.wav_chan0.xml	0	0
01/07/2015 8:58	AMAR379.9.20150701T085823Z.wav_chan0.xml	0	0
01/07/2015 9:06	AMAR379.9.20150701T090623Z.wav_chan0.xml	0	0
01/07/2015 9:14	AMAR379.9.20150701T091423Z.wav_chan0.xml	0	0
01/07/2015 9:22	AMAR379.9.20150701T092223Z.wav_chan0.xml	0	0
01/07/2015 9:30	AMAR379.9.20150701T093023Z.wav_chan0.xml	0	0
01/07/2015 9:38	AMAR379.9.20150701T093823Z.wav_chan0.xml	0	0
01/07/2015 9:46	AMAR379.9.20150701T094623Z.wav_chan0.xml	0	0
01/07/2015 9:54	AMAR379.9.20150701T095423Z.wav_chan0.xml	0	0
01/07/2015 10:02	AMAR379.9.20150701T100223Z.wav_chan0.xml	0	0
01/07/2015 10:10	AMAR379.9.20150701T101023Z.wav_chan0.xml	0	0
01/07/2015 10:18	AMAR379.9.20150701T101823Z.wav_chan0.xml	0	0
01/07/2015 10:26	AMAR379.9.20150701T102623Z.wav_chan0.xml	0	0
01/07/2015 10:34	AMAR379.9.20150701T103423Z.wav_chan0.xml	0	0
01/07/2015 10:42	AMAR379.9.20150701T104223Z.wav_chan0.xml	0	0
01/07/2015 10:50	AMAR379.9.20150701T105023Z.wav_chan0.xml	0	0
01/07/2015 10:58	AMAR379.9.20150701T105823Z.wav_chan0.xml	0	0
01/07/2015 11:06	AMAR379.9.20150701T110623Z.wav_chan0.xml	0	0
01/07/2015 11:14	AMAR379.9.20150701T111423Z.wav_chan0.xml	0	0
01/07/2015 11:22	AMAR379.9.20150701T112223Z.wav_chan0.xml	0	0
01/07/2015 11:30	AMAR379.9.20150701T113023Z.wav_chan0.xml	0	0
01/07/2015 11:38	AMAR379.9.20150701T113823Z.wav_chan0.xml	0	0
01/07/2015 11:46	AMAR379.9.20150701T114623Z.wav_chan0.xml	0	0
01/07/2015 11:54	AMAR379.9.20150701T115423Z.wav_chan0.xml	0	0
01/07/2015 12:02	AMAR379.9.20150701T120223Z.wav_chan0.xml	0	0
01/07/2015 12:10	AMAR379.9.20150701T121023Z.wav_chan0.xml	0	0
01/07/2015 12:18	AMAR379.9.20150701T121823Z.wav_chan0.xml	0	0
01/07/2015 12:26	AMAR379.9.20150701T122623Z.wav_chan0.xml	0	0
01/07/2015 12:34	AMAR379.9.20150701T123423Z.wav_chan0.xml	0	0
01/07/2015 12:42	AMAR379.9.20150701T124223Z.wav_chan0.xml	0	0
01/07/2015 12:50	AMAR379.9.20150701T125023Z.wav_chan0.xml	0	0
01/07/2015 12:58	AMAR379.9.20150701T125823Z.wav_chan0.xml	0	0
01/07/2015 13:06	AMAR379.9.20150701T130623Z.wav_chan0.xml	0	0
01/07/2015 13:14	AMAR379.9.20150701T131423Z.wav_chan0.xml	0	0
01/07/2015 13:22	AMAR379.9.20150701T132223Z.wav_chan0.xml	0	0
01/07/2015 13:30	AMAR379.9.20150701T133023Z.wav_chan0.xml	0	0
01/07/2015 13:38	AMAR379.9.20150701T133823Z.wav_chan0.xml	0	0
01/07/2015 13:46	AMAR379.9.20150701T134623Z.wav_chan0.xml	0	0
01/07/2015 13:54	AMAR379.9.20150701T135423Z.wav_chan0.xml	1	0
01/07/2015 14:02	AMAR379.9.20150701T140223Z.wav_chan0.xml	0	0
01/07/2015 14:10	AMAR379.9.20150701T141023Z.wav_chan0.xml	0	0
01/07/2015 14:18	AMAR379.9.20150701T141823Z.wav_chan0.xml	0	0
01/07/2015 14:26	AMAR379.9.20150701T142623Z.wav_chan0.xml	0	0
01/07/2015 14:34	AMAR379.9.20150701T143423Z.wav_chan0.xml	0	0
01/07/2015 14:42	AMAR379.9.20150701T144223Z.wav_chan0.xml	0	0
01/07/2015 14:50	AMAR379.9.20150701T145023Z.wav_chan0.xml	0	0
01/07/2015 14:58	AMAR379.9.20150701T145823Z.wav_chan0.xml	0	0
01/07/2015 15:06	AMAR379.9.20150701T150623Z.wav_chan0.xml	0	0
01/07/2015 15:14	AMAR379.9.20150701T151423Z.wav_chan0.xml	0	0
01/07/2015 15:22	AMAR379.9.20150701T152223Z.wav_chan0.xml	0	0
01/07/2015 15:30	AMAR379.9.20150701T153023Z.wav_chan0.xml	0	0
01/07/2015 15:38	AMAR379.9.20150701T153823Z.wav_chan0.xml	0	0
01/07/2015 15:46	AMAR379.9.20150701T154623Z.wav_chan0.xml	0	0
01/07/2015 15:54	AMAR379.9.20150701T155423Z.wav_chan0.xml	0	0
01/07/2015 16:02	AMAR379.9.20150701T160223Z.wav_chan0.xml	0	0
01/07/2015 16:10	AMAR379.9.20150701T161023Z.wav_chan0.xml	0	0
01/07/2015 16:18	AMAR379.9.20150701T161823Z.wav_chan0.xml	0	0
01/07/2015 16:26	AMAR379.9.20150701T162623Z.wav_chan0.xml	0	0
01/07/2015 16:34	AMAR379.9.20150701T163423Z.wav_chan0.xml	0	0
01/07/2015 16:42	AMAR379.9.20150701T164223Z.wav_chan0.xml	0	0
01/07/2015 16:50	AMAR379.9.20150701T165023Z.wav_chan0.xml	0	0
01/07/2015 16:58	AMAR379.9.20150701T165823Z.wav_chan0.xml	0	0
01/07/2015 17:06	AMAR379.9.20150701T170623Z.wav_chan0.xml	0	0
01/07/2015 17:14	AMAR379.9.20150701T171423Z.wav_chan0.xml	0	0
01/07/2015 17:22	AMAR379.9.20150701T172223Z.wav_chan0.xml	0	0
01/07/2015 17:30	AMAR379.9.20150701T173023Z.wav_chan0.xml	0	0
01/07/2015 17:38	AMAR379.9.20150701T173823Z.wav_chan0.xml	0	0
01/07/2015 17:46	AMAR379.9.20150701T174623Z.wav_chan0.xml	0	0
01/07/2015 17:54	AMAR379.9.20150701T175423Z.wav_chan0.xml	0	0
01/07/2015 18:02	AMAR379.9.20150701T180223Z.wav_chan0.xml	0	0
01/07/2015 18:10	AMAR379.9.20150701T181023Z.wav_chan0.xml	0	0
01/07/2015 18:18	AMAR379.9.20150701T181823Z.wav_chan0.xml	0	0
01/07/2015 18:26	AMAR379.9.20150701T182623Z.wav_chan0.xml	0	0
01/07/2015 18:34	AMAR379.9.20150701T183423Z.wav_chan0.xml	0	0
01/07/2015 18:42	AMAR379.9.20150701T184223Z.wav_chan0.xml	0	0
01/07/2015 18:50	AMAR379.9.20150701T185023Z.wav_chan0.xml	0	0
01/07/2015 18:58	AMAR379.9.20150701T185823Z.wav_chan0.xml	0	0
01/07/2015 19:06	AMAR379.9.20150701T190623Z.wav_chan0.xml	0	0
01/07/2015 19:14	AMAR379.9.20150701T191423Z.wav_chan0.xml	0	0
01/07/2015 19:22	AMAR379.9.20150701T192223Z.wav_chan0.xml	0	0
01/07/2015 19:30	AMAR379.9.20150701T193023Z.wav_chan0.xml	0	0
01/07/2015 19:38	AMAR379.9.20150701T193823Z.wav_chan0.xml	0	11
01/07/2015 19:46	AMAR379.9.20150701T194623Z.wav_chan0.xml	0	2
01/07/2015 19:54	AMAR379.9.20150701T195423Z.wav_chan0.xml	0	0
01/07/2015 20:02	AMAR379.9.20150701T200223Z.wav_chan0.xml	0	0
01/07/2015 20:10	AMAR379.9.20150701T201023Z.wav_chan0.xml	0	0
01/07/2015 20:18	AMAR379.9.20150701T201823Z.wav_chan0.xml	0	0
01/07/2015 20:26	AMAR379.9.20150701T202623Z.wav_chan0.xml	0	0
01/07/2015 20:34	AMAR379.9.20150701T203423Z.wav_chan0.xml	0	0
01/07/2015 20:42	AMAR379.9.20150701T204223Z.wav_chan0.xml	0	0
01/07/2015 20:50	AMAR379.9.20150701T205023Z.wav_chan0.xml	0	0
01/07/2015 20:58	AMAR379.9.20150701T205823Z.wav_chan0.xml	0	0
01/07/2015 21:06	AMAR379.9.20150701T210623Z.wav_chan0.xml	0	0
01/07/2015 21:14	AMAR379.9.20150701T211423Z.wav_chan0.xml	0	0
01/07/2015 21:22	AMAR379.9.20150701T212223Z.wav_chan0.xml	0	0
01/07/2015 21:30	AMAR379.9.20150701T213023Z.wav_chan0.xml	0	0
01/07/2015 21:38	AMAR379.9.20150701T213823Z.wav_chan0.xml	0	0
01/07/2015 21:46	AMAR379.9.20150701T214623Z.wav_chan0.xml	0	0
01/07/2015 21:54	AMAR379.9.20150701T215423Z.wav_chan0.xml	0	0
01/07/2015 22:02	AMAR379.9.20150701T220223Z.wav_chan0.xml	0	0
01/07/2015 22:10	AMAR379.9.20150701T221023Z.wav_chan0.xml	0	0
01/07/2015 22:18	AMAR379.9.20150701T221823Z.wav_chan0.xml	0	0
01/07/2015 22:26	AMAR379.9.20150701T222623Z.wav_chan0.xml	0	0
01/07/2015 22:34	AMAR379.9.20150701T223423Z.wav_chan0.xml	0	0
01/07/2015 22:42	AMAR379.9.20150701T224223Z.wav_chan0.xml	0	0
01/07/2015 22:50	AMAR379.9.20150701T225023Z.wav_chan0.xml	0	0
01/07/2015 22:58	AMAR379.9.20150701T225823Z.wav_chan0.xml	0	0
01/07/2015 23:06	AMAR379.9.20150701T230623Z.wav_chan0.xml	0	0
01/07/2015 23:14	AMAR379.9.20150701T231423Z.wav_chan0.xml	0	0
01/07/2015 23:22	AMAR379.9.20150701T232223Z.wav_chan0.xml	0	0
01/07/2015 23:30	AMAR379.9.20150701T233023Z.wav_chan0.xml	0	0
01/07/2015 23:38	AMAR379.9.20150701T233823Z.wav_chan0.xml	0	0
01/07/2015 23:46	AMAR379.9.20150701T234623Z.wav_chan0.xml	0	0
01/07/2015 23:54	AMAR379.9.20150701T235423Z.wav_chan0.xml	0	0
01/06/2015 0:02	AMAR379.9.20150601T000223Z.wav_chan0.xml	0	0
01/06/2015 0:10	AMAR379.9.20150601T001023Z.wav_chan0.xml	0	0
01/06/2015 0:18	AMAR379.9.20150601T001823Z.wav_chan0.xml	0	0
01/06/2015 0:26	AMAR379.9.20150601T002623Z.wav_chan0.xml	0	0
01/06/2015 0:34	AMAR379.9.20150601T003423Z.wav_chan0.xml	0	0
01/06/2015 0:42	AMAR379.9.20150601T004223Z.wav_chan0.xml	0	0
01/06/2015 0:50	AMAR379.9.20150601T005023Z.wav_chan0.xml	0	0
01/06/2015 0:58	AMAR379.9.20150601T005823Z.wav_chan0.xml	0	0
01/06/2015 1:06	AMAR379.9.20150601T010623Z.wav_chan0.xml	0	0
01/06/2015 1:14	AMAR379.9.20150601T011423Z.wav_chan0.xml	0	0
01/06/2015 1:22	AMAR379.9.20150601T012223Z.wav_chan0.xml	2	0
01/06/2015 1:30	AMAR379.9.20150601T013023Z.wav_chan0.xml	0	0
01/06/2015 1:38	AMAR379.9.20150601T013823Z.wav_chan0.xml	0	0
01/06/2015 1:46	AMAR379.9.20150601T014623Z.wav_chan0.xml	0	0
01/06/2015 1:54	AMAR379.9.20150601T015423Z.wav_chan0.xml	0	0
01/06/2015 2:02	AMAR379.9.20150601T020223Z.wav_chan0.xml	0	0
01/06/2015 2:10	AMAR379.9.20150601T021023Z.wav_chan0.xml	0	0
01/06/2015 2:18	AMAR379.9.20150601T021823Z.wav_chan0.xml	0	0
01/06/2015 2:26	AMAR379.9.20150601T022623Z.wav_chan0.xml	0	0
01/06/2015 2:34	AMAR379.9.20150601T023423Z.wav_chan0.xml	0	0
01/06/2015 2:42	AMAR379.9.20150601T024223Z.wav_chan0.xml	0	0
01/06/2015 2:50	AMAR379.9.20150601T025023Z.wav_chan0.xml	0	0
01/06/2015 2:58	AMAR379.9.20150601T025823Z.wav_chan0.xml	0	0
01/06/2015 3:06	AMAR379.9.20150601T030623Z.wav_chan0.xml	0	0
01/06/2015 3:14	AMAR379.9.20150601T031423Z.wav_chan0.xml	0	0
01/06/2015 3:22	AMAR379.9.20150601T032223Z.wav_chan0.xml	0	0
01/06/2015 3:30	AMAR379.9.20150601T033023Z.wav_chan0.xml	0	0
01/06/2015 3:38	AMAR379.9.20150601T033823Z.wav_chan0.xml	0	0
01/06/2015 3:46	AMAR379.9.20150601T034623Z.wav_chan0.xml	0	0
01/06/2015 3:54	AMAR379.9.20150601T035423Z.wav_chan0.xml	0	0
01/06/2015 4:02	AMAR379.9.20150601T040223Z.wav_chan0.xml	0	0
01/06/2015 4:10	AMAR379.9.20150601T041023Z.wav_chan0.xml	0	0
01/06/2015 4:18	AMAR379.9.20150601T041823Z.wav_chan0.xml	0	0
01/06/2015 4:26	AMAR379.9.20150601T042623Z.wav_chan0.xml	0	0
01/06/2015 4:34	AMAR379.9.20150601T043423Z.wav_chan0.xml	0	0
01/06/2015 4:42	AMAR379.9.20150601T044223Z.wav_chan0.xml	0	0
01/06/2015 4:50	AMAR379.9.20150601T045023Z.wav_chan0.xml	0	0
01/06/2015 4:58	AMAR379.9.20150601T045823Z.wav_chan0.xml	0	0
01/06/2015 5:06	AMAR379.9.20150601T050623Z.wav_chan0.xml	0	0
01/06/2015 5:14	AMAR379.9.20150601T051423Z.wav_chan0.xml	0	0
01/06/2015 5:22	AMAR379.9.20150601T052223Z.wav_chan0.xml	0	0
01/06/2015 5:30	AMAR379.9.20150601T053023Z.wav_chan0.xml	0	0
01/06/2015 5:38	AMAR379.9.20150601T053823Z.wav_chan0.xml	0	0
01/06/2015 5:46	AMAR379.9.20150601T054623Z.wav_chan0.xml	0	0
01/06/2015 5:54	AMAR379.9.20150601T055423Z.wav_chan0.xml	0	0
01/06/2015 6:02	AMAR379.9.20150601T060223Z.wav_chan0.xml	0	0
01/06/2015 6:10	AMAR379.9.20150601T061023Z.wav_chan0.xml	0	0
01/06/2015 6:18	AMAR379.9.20150601T061823Z.wav_chan0.xml	0	0
01/06/2015 6:26	AMAR379.9.20150601T062623Z.wav_chan0.xml	0	0
01/06/2015 6:34	AMAR379.9.20150601T063423Z.wav_chan0.xml	0	0
01/06/2015 6:42	AMAR379.9.20150601T064223Z.wav_chan0.xml	0	0
01/06/2015 6:50	AMAR379.9.20150601T065023Z.wav_chan0.xml	0	0
01/06/2015 6:58	AMAR379.9.20150601T065823Z.wav_chan0.xml	0	0
01/06/2015 7:06	AMAR379.9.20150601T070623Z.wav_chan0.xml	0	0
01/06/2015 7:14	AMAR379.9.20150601T071423Z.wav_chan0.xml	0	0
01/06/2015 7:22	AMAR379.9.20150601T072223Z.wav_chan0.xml	0	0
01/06/2015 7:30	AMAR379.9.20150601T073023Z.wav_chan0.xml	0	0
01/06/2015 7:38	AMAR379.9.20150601T073823Z.wav_chan0.xml	0	0
01/06/2015 7:46	AMAR379.9.20150601T074623Z.wav_chan0.xml	0	0
01/06/2015 7:54	AMAR379.9.20150601T075423Z.wav_chan0.xml	0	0
01/06/2015 8:02	AMAR379.9.20150601T080223Z.wav_chan0.xml	0	0
01/06/2015 8:10	AMAR379.9.20150601T081023Z.wav_chan0.xml	0	0
01/06/2015 8:18	AMAR379.9.20150601T081823Z.wav_chan0.xml	0	0
01/06/2015 8:26	AMAR379.9.20150601T082623Z.wav_chan0.xml	0	0
01/06/2015 8:34	AMAR379.9.20150601T083423Z.wav_chan0.xml	0	0
01/06/2015 8:42	AMAR379.9.20150601T084223Z.wav_chan0.xml	0	0
01/06/2015 8:50	AMAR379.9.20150601T085023Z.wav_chan0.xml	0	0
01/06/2015 8:58	AMAR379.9.20150601T085823Z.wav_chan0.xml	0	0
01/06/2015 9:06	AMAR379.9.20150601T090623Z.wav_chan0.xml	0	0
01/06/2015 9:14	AMAR379.9.20150601T091423Z.wav_chan0.xml	0	0
01/06/2015 9:22	AMAR379.9.20150601T092223Z.wav_chan0.xml	0	0
01/06/2015 9:30	AMAR379.9.20150601T093023Z.wav_chan0.xml	0	0
01/06/2015 9:38	AMAR379.9.20150601T093823Z.wav_chan0.xml	0	0
01/06/2015 9:46	AMAR379.9.20150601T094623Z.wav_chan0.xml	0	0
01/06/2015 9:54	AMAR379.9.20150601T095423Z.wav_chan0.xml	0	0
01/06/2015 10:02	AMAR379.9.20150601T100223Z.wav_chan0.xml	0	0
01/06/2015 10:10	AMAR379.9.20150601T101023Z.wav_chan0.xml	0	0
01/06/2015 10:18	AMAR379.9.20150601T101823Z.wav_chan0.xml	0	0
01/06/2015 10:26	AMAR379.9.20150601T102623Z.wav_chan0.xml	0	0
01/06/2015 10:34	AMAR379.9.20150601T103423Z.wav_chan0.xml	0	0
01/06/2015 10:42	AMAR379.9.20150601T104223Z.wav_chan0.xml	0	0
01/06/2015 10:50	AMAR379.9.20150601T105023Z.wav_chan0.xml	0	0
01/06/2015 10:58	AMAR379.9.20150601T105823Z.wav_chan0.xml	0	0
01/06/2015 11:06	AMAR379.9.20150601T110623Z.wav_chan0.xml	0	0
01/06/2015 11:14	AMAR379.9.20150601T111423Z.wav_chan0.xml	0	0
01/06/2015 11:22	AMAR379.9.20150601T112223Z.wav_chan0.xml	0	0
01/06/2015 11:30	AMAR379.9.20150601T113023Z.wav_chan0.xml	0	0
01/06/2015 11:38	AMAR379.9.20150601T113823Z.wav_chan0.xml	0	0
01/06/2015 11:46	AMAR379.9.20150601T114623Z.wav_chan0.xml	0	0
01/06/2015 11:54	AMAR379.9.20150601T115423Z.wav_chan0.xml	0	0
01/06/2015 12:02	AMAR379.9.20150601T120223Z.wav_chan0.xml	0	0
01/06/2015 12:10	AMAR379.9.20150601T121023Z.wav_chan0.xml	0	0
01/06/2015 12:18	AMAR379.9.20150601T121823Z.wav_chan0.xml	0	0
01/06/2015 12:26	AMAR379.9.20150601T122623Z.wav_chan0.xml	0	0
01/06/2015 12:34	AMAR379.9.20150601T123423Z.wav_chan0.xml	0	0
01/06/2015 12:42	AMAR379.9.20150601T124223Z.wav_chan0.xml	0	0
01/06/2015 12:50	AMAR379.9.20150601T125023Z.wav_chan0.xml	0	0
01/06/2015 12:58	AMAR379.9.20150601T125823Z.wav_chan0.xml	0	0
01/06/2015 13:06	AMAR379.9.20150601T130623Z.wav_chan0.xml	0	0
01/06/2015 13:14	AMAR379.9.20150601T131423Z.wav_chan0.xml	0	0
01/06/2015 13:22	AMAR379.9.20150601T132223Z.wav_chan0.xml	0	0
01/06/2015 13:30	AMAR379.9.20150601T133023Z.wav_chan0.xml	0	0
01/06/2015 13:38	AMAR379.9.20150601T133823Z.wav_chan0.xml	0	0
01/06/2015 13:46	AMAR379.9.20150601T134623Z.wav_chan0.xml	0	0
01/06/2015 13:54	AMAR379.9.20150601T135423Z.wav_chan0.xml	0	0
01/06/2015 14:02	AMAR379.9.20150601T140223Z.wav_chan0.xml	0	0
01/06/2015 14:10	AMAR379.9.20150601T141023Z.wav_chan0.xml	0	0
01/06/2015 14:18	AMAR379.9.20150601T141823Z.wav_chan0.xml	0	0
01/06/2015 14:26	AMAR379.9.20150601T142623Z.wav_chan0.xml	0	0
01/06/2015 14:34	AMAR379.9.20150601T143423Z.wav_chan0.xml	0	0
01/06/2015 14:42	AMAR379.9.20150601T144223Z.wav_chan0.xml	0	0
01/06/2015 14:50	AMAR379.9.20150601T145023Z.wav_chan0.xml	0	0
01/06/2015 14:58	AMAR379.9.20150601T145823Z.wav_chan0.xml	0	0
01/06/2015 15:06	AMAR379.9.20150601T150623Z.wav_chan0.xml	0	0
01/06/2015 15:14	AMAR379.9.20150601T151423Z.wav_chan0.xml	0	0
01/06/2015 15:22	AMAR379.9.20150601T152223Z.wav_chan0.xml	0	0
01/06/2015 15:30	AMAR379.9.20150601T153023Z.wav_chan0.xml	0	0
01/06/2015 15:38	AMAR379.9.20150601T153823Z.wav_chan0.xml	0	0
01/06/2015 15:46	AMAR379.9.20150601T154623Z.wav_chan0.xml	0	0
01/06/2015 15:54	AMAR379.9.20150601T155423Z.wav_chan0.xml	0	0
01/06/2015 16:02	AMAR379.9.20150601T160223Z.wav_chan0.xml	0	0
01/06/2015 16:10	AMAR379.9.20150601T161023Z.wav_chan0.xml	0	0
01/06/2015 16:18	AMAR379.9.20150601T161823Z.wav_chan0.xml	0	0
01/06/2015 16:26	AMAR379.9.20150601T162623Z.wav_chan0.xml	0	0
01/06/2015 16:34	AMAR379.9.20150601T163423Z.wav_chan0.xml	0	0
01/06/2015 16:42	AMAR379.9.20150601T164223Z.wav_chan0.xml	0	0
01/06/2015 16:50	AMAR379.9.20150601T165023Z.wav_chan0.xml	0	0
01/06/2015 16:58	AMAR379.9.20150601T165823Z.wav_chan0.xml	0	0
01/06/2015 17:06	AMAR379.9.20150601T170623Z.wav_chan0.xml	0	0
01/06/2015 17:14	AMAR379.9.20150601T171423Z.wav_chan0.xml	0	0
01/06/2015 17:22	AMAR379.9.20150601T172223Z.wav_chan0.xml	0	0
01/06/2015 17:30	AMAR379.9.20150601T173023Z.wav_chan0.xml	1	1
01/06/2015 17:38	AMAR379.9.20150601T173823Z.wav_chan0.xml	0	0
01/06/2015 17:46	AMAR379.9.20150601T174623Z.wav_chan0.xml	0	0
01/06/2015 17:54	AMAR379.9.20150601T175423Z.wav_chan0.xml	0	0
01/06/2015 18:02	AMAR379.9.20150601T180223Z.wav_chan0.xml	0	0
01/06/2015 18:10	AMAR379.9.20150601T181023Z.wav_chan0.xml	0	0
01/06/2015 18:18	AMAR379.9.20150601T181823Z.wav_chan0.xml	0	0
01/06/2015 18:26	AMAR379.9.20150601T182623Z.wav_chan0.xml	0	0
01/06/2015 18:34	AMAR379.9.20150601T183423Z.wav_chan0.xml	0	0
01/06/2015 18:42	AMAR379.9.20150601T184223Z.wav_chan0.xml	0	0
01/06/2015 18:50	AMAR379.9.20150601T185023Z.wav_chan0.xml	0	0
01/06/2015 18:58	AMAR379.9.20150601T185823Z.wav_chan0.xml	0	0
01/06/2015 19:06	AMAR379.9.20150601T190623Z.wav_chan0.xml	0	0
01/06/2015 19:14	AMAR379.9.20150601T191423Z.wav_chan0.xml	0	0
01/06/2015 19:22	AMAR379.9.20150601T192223Z.wav_chan0.xml	0	0
01/06/2015 19:30	AMAR379.9.20150601T193023Z.wav_chan0.xml	0	0
01/06/2015 19:38	AMAR379.9.20150601T193823Z.wav_chan0.xml	0	0
01/06/2015 19:46	AMAR379.9.20150601T194623Z.wav_chan0.xml	0	0
01/06/2015 19:54	AMAR379.9.20150601T195423Z.wav_chan0.xml	0	0
01/06/2015 20:02	AMAR379.9.20150601T200223Z.wav_chan0.xml	0	0
01/06/2015 20:10	AMAR379.9.20150601T201023Z.wav_chan0.xml	0	0
01/06/2015 20:18	AMAR379.9.20150601T201823Z.wav_chan0.xml	0	0
01/06/2015 20:26	AMAR379.9.20150601T202623Z.wav_chan0.xml	0	0
01/06/2015 20:34	AMAR379.9.20150601T203423Z.wav_chan0.xml	0	0
01/06/2015 20:42	AMAR379.9.20150601T204223Z.wav_chan0.xml	0	0
01/06/2015 20:50	AMAR379.9.20150601T205023Z.wav_chan0.xml	0	0
01/06/2015 20:58	AMAR379.9.20150601T205823Z.wav_chan0.xml	0	0
01/06/2015 21:06	AMAR379.9.20150601T210623Z.wav_chan0.xml	0	0
01/06/2015 21:14	AMAR379.9.20150601T211423Z.wav_chan0.xml	0	0
01/06/2015 21:22	AMAR379.9.20150601T212223Z.wav_chan0.xml	0	0
01/06/2015 21:30	AMAR379.9.20150601T213023Z.wav_chan0.xml	0	0
01/06/2015 21:38	AMAR379.9.20150601T213823Z.wav_chan0.xml	0	0
01/06/2015 21:46	AMAR379.9.20150601T214623Z.wav_chan0.xml	0	0
01/06/2015 21:54	AMAR379.9.20150601T215423Z.wav_chan0.xml	0	0
01/06/2015 22:02	AMAR379.9.20150601T220223Z.wav_chan0.xml	0	0
01/06/2015 22:10	AMAR379.9.20150601T221023Z.wav_chan0.xml	0	0
01/06/2015 22:18	AMAR379.9.20150601T221823Z.wav_chan0.xml	0	0
01/06/2015 22:26	AMAR379.9.20150601T222623Z.wav_chan0.xml	0	0
01/06/2015 22:34	AMAR379.9.20150601T223423Z.wav_chan0.xml	0	0
01/06/2015 22:42	AMAR379.9.20150601T224223Z.wav_chan0.xml	0	0
01/06/2015 22:50	AMAR379.9.20150601T225023Z.wav_chan0.xml	0	0
01/06/2015 22:58	AMAR379.9.20150601T225823Z.wav_chan0.xml	0	0
01/06/2015 23:06	AMAR379.9.20150601T230623Z.wav_chan0.xml	0	0
01/06/2015 23:14	AMAR379.9.20150601T231423Z.wav_chan0.xml	0	0
01/06/2015 23:22	AMAR379.9.20150601T232223Z.wav_chan0.xml	0	0
01/06/2015 23:30	AMAR379.9.20150601T233023Z.wav_chan0.xml	0	0
01/06/2015 23:38	AMAR379.9.20150601T233823Z.wav_chan0.xml	0	0
01/06/2015 23:46	AMAR379.9.20150601T234623Z.wav_chan0.xml	0	0
01/06/2015 23:54	AMAR379.9.20150601T235423Z.wav_chan0.xml	0	0
02/08/2015 0:02	AMAR379.9.20150802T000223Z.wav_chan0.xml	0	0
02/08/2015 0:10	AMAR379.9.20150802T001023Z.wav_chan0.xml	0	0
02/08/2015 0:18	AMAR379.9.20150802T001823Z.wav_chan0.xml	0	0
02/08/2015 0:26	AMAR379.9.20150802T002623Z.wav_chan0.xml	0	0
02/08/2015 0:34	AMAR379.9.20150802T003423Z.wav_chan0.xml	0	0
02/08/2015 0:42	AMAR379.9.20150802T004223Z.wav_chan0.xml	0	0
02/08/2015 0:50	AMAR379.9.20150802T005023Z.wav_chan0.xml	0	0
02/08/2015 0:58	AMAR379.9.20150802T005823Z.wav_chan0.xml	0	0
02/08/2015 1:06	AMAR379.9.20150802T010623Z.wav_chan0.xml	0	0
02/08/2015 1:14	AMAR379.9.20150802T011423Z.wav_chan0.xml	0	0
02/08/2015 1:22	AMAR379.9.20150802T012223Z.wav_chan0.xml	0	0
02/08/2015 1:30	AMAR379.9.20150802T013023Z.wav_chan0.xml	0	0
02/08/2015 1:38	AMAR379.9.20150802T013823Z.wav_chan0.xml	0	0
02/08/2015 1:46	AMAR379.9.20150802T014623Z.wav_chan0.xml	0	0
02/08/2015 1:54	AMAR379.9.20150802T015423Z.wav_chan0.xml	0	0
02/08/2015 2:02	AMAR379.9.20150802T020223Z.wav_chan0.xml	0	0
02/08/2015 2:10	AMAR379.9.20150802T021023Z.wav_chan0.xml	0	0
02/08/2015 2:18	AMAR379.9.20150802T021823Z.wav_chan0.xml	0	0
02/08/2015 2:26	AMAR379.9.20150802T022623Z.wav_chan0.xml	0	0
02/08/2015 2:34	AMAR379.9.20150802T023423Z.wav_chan0.xml	0	0
02/08/2015 2:42	AMAR379.9.20150802T024223Z.wav_chan0.xml	0	0
02/08/2015 2:50	AMAR379.9.20150802T025023Z.wav_chan0.xml	0	0
02/08/2015 2:58	AMAR379.9.20150802T025823Z.wav_chan0.xml	0	0
02/08/2015 3:06	AMAR379.9.20150802T030623Z.wav_chan0.xml	0	0
02/08/2015 3:14	AMAR379.9.20150802T031423Z.wav_chan0.xml	0	0
02/08/2015 3:22	AMAR379.9.20150802T032223Z.wav_chan0.xml	0	0
02/08/2015 3:30	AMAR379.9.20150802T033023Z.wav_chan0.xml	0	0
02/08/2015 3:38	AMAR379.9.20150802T033823Z.wav_chan0.xml	0	0
02/08/2015 3:46	AMAR379.9.20150802T034623Z.wav_chan0.xml	0	0
02/08/2015 3:54	AMAR379.9.20150802T035423Z.wav_chan0.xml	0	0
02/08/2015 4:02	AMAR379.9.20150802T040223Z.wav_chan0.xml	0	0
02/08/2015 4:10	AMAR379.9.20150802T041023Z.wav_chan0.xml	0	0
02/08/2015 4:18	AMAR379.9.20150802T041823Z.wav_chan0.xml	0	0
02/08/2015 4:26	AMAR379.9.20150802T042623Z.wav_chan0.xml	0	0
02/08/2015 4:34	AMAR379.9.20150802T043423Z.wav_chan0.xml	0	0
02/08/2015 4:42	AMAR379.9.20150802T044223Z.wav_chan0.xml	0	0
02/08/2015 4:50	AMAR379.9.20150802T045023Z.wav_chan0.xml	0	0
02/08/2015 4:58	AMAR379.9.20150802T045823Z.wav_chan0.xml	0	0
02/08/2015 5:06	AMAR379.9.20150802T050623Z.wav_chan0.xml	0	0
02/08/2015 5:14	AMAR379.9.20150802T051423Z.wav_chan0.xml	0	0
02/08/2015 5:22	AMAR379.9.20150802T052223Z.wav_chan0.xml	0	0
02/08/2015 5:30	AMAR379.9.20150802T053023Z.wav_chan0.xml	0	0
02/08/2015 5:38	AMAR379.9.20150802T053823Z.wav_chan0.xml	0	0
02/08/2015 5:46	AMAR379.9.20150802T054623Z.wav_chan0.xml	0	0
02/08/2015 5:54	AMAR379.9.20150802T055423Z.wav_chan0.xml	0	0
02/08/2015 6:02	AMAR379.9.20150802T060223Z.wav_chan0.xml	0	0
02/08/2015 6:10	AMAR379.9.20150802T061023Z.wav_chan0.xml	0	0
02/08/2015 6:18	AMAR379.9.20150802T061823Z.wav_chan0.xml	0	0
02/08/2015 6:26	AMAR379.9.20150802T062623Z.wav_chan0.xml	0	0
02/08/2015 6:34	AMAR379.9.20150802T063423Z.wav_chan0.xml	0	0
02/08/2015 6:42	AMAR379.9.20150802T064223Z.wav_chan0.xml	0	0
02/08/2015 6:50	AMAR379.9.20150802T065023Z.wav_chan0.xml	0	0
02/08/2015 6:58	AMAR379.9.20150802T065823Z.wav_chan0.xml	0	0
02/08/2015 7:06	AMAR379.9.20150802T070623Z.wav_chan0.xml	0	0
02/08/2015 7:14	AMAR379.9.20150802T071423Z.wav_chan0.xml	0	0
02/08/2015 7:22	AMAR379.9.20150802T072223Z.wav_chan0.xml	0	0
02/08/2015 7:30	AMAR379.9.20150802T073023Z.wav_chan0.xml	0	0
02/08/2015 7:38	AMAR379.9.20150802T073823Z.wav_chan0.xml	0	0
02/08/2015 7:46	AMAR379.9.20150802T074623Z.wav_chan0.xml	0	0
02/08/2015 7:54	AMAR379.9.20150802T075423Z.wav_chan0.xml	0	0
02/08/2015 8:02	AMAR379.9.20150802T080223Z.wav_chan0.xml	0	0
02/08/2015 8:10	AMAR379.9.20150802T081023Z.wav_chan0.xml	0	0
02/08/2015 8:18	AMAR379.9.20150802T081823Z.wav_chan0.xml	0	0
02/08/2015 8:26	AMAR379.9.20150802T082623Z.wav_chan0.xml	0	0
02/08/2015 8:34	AMAR379.9.20150802T083423Z.wav_chan0.xml	0	0
02/08/2015 8:42	AMAR379.9.20150802T084223Z.wav_chan0.xml	0	0
02/08/2015 8:50	AMAR379.9.20150802T085023Z.wav_chan0.xml	0	0
02/08/2015 8:58	AMAR379.9.20150802T085823Z.wav_chan0.xml	0	0
02/08/2015 9:06	AMAR379.9.20150802T090623Z.wav_chan0.xml	0	0
02/08/2015 9:14	AMAR379.9.20150802T091423Z.wav_chan0.xml	0	0
02/08/2015 9:22	AMAR379.9.20150802T092223Z.wav_chan0.xml	0	0
02/08/2015 9:30	AMAR379.9.20150802T093023Z.wav_chan0.xml	0	0
02/08/2015 9:38	AMAR379.9.20150802T093823Z.wav_chan0.xml	0	0
02/08/2015 9:46	AMAR379.9.20150802T094623Z.wav_chan0.xml	0	0
02/08/2015 9:54	AMAR379.9.20150802T095423Z.wav_chan0.xml	0	0
02/08/2015 10:02	AMAR379.9.20150802T100223Z.wav_chan0.xml	0	0
02/08/2015 10:10	AMAR379.9.20150802T101023Z.wav_chan0.xml	0	0
02/08/2015 10:18	AMAR379.9.20150802T101823Z.wav_chan0.xml	0	0
02/08/2015 10:26	AMAR379.9.20150802T102623Z.wav_chan0.xml	0	0
02/08/2015 10:34	AMAR379.9.20150802T103423Z.wav_chan0.xml	0	0
02/08/2015 10:42	AMAR379.9.20150802T104223Z.wav_chan0.xml	0	0
02/08/2015 10:50	AMAR379.9.20150802T105023Z.wav_chan0.xml	0	0
02/08/2015 10:58	AMAR379.9.20150802T105823Z.wav_chan0.xml	0	0
02/08/2015 11:06	AMAR379.9.20150802T110623Z.wav_chan0.xml	0	0
02/08/2015 11:14	AMAR379.9.20150802T111423Z.wav_chan0.xml	0	0
02/08/2015 11:22	AMAR379.9.20150802T112223Z.wav_chan0.xml	0	0
02/08/2015 11:30	AMAR379.9.20150802T113023Z.wav_chan0.xml	0	0
02/08/2015 11:38	AMAR379.9.20150802T113823Z.wav_chan0.xml	0	0
02/08/2015 11:46	AMAR379.9.20150802T114623Z.wav_chan0.xml	0	0
02/08/2015 11:54	AMAR379.9.20150802T115423Z.wav_chan0.xml	0	0
02/08/2015 12:02	AMAR379.9.20150802T120223Z.wav_chan0.xml	0	0
02/08/2015 12:10	AMAR379.9.20150802T121023Z.wav_chan0.xml	0	0
02/08/2015 12:18	AMAR379.9.20150802T121823Z.wav_chan0.xml	0	0
02/08/2015 12:26	AMAR379.9.20150802T122623Z.wav_chan0.xml	0	0
02/08/2015 12:34	AMAR379.9.20150802T123423Z.wav_chan0.xml	0	0
02/08/2015 12:42	AMAR379.9.20150802T124223Z.wav_chan0.xml	0	0
02/08/2015 12:50	AMAR379.9.20150802T125023Z.wav_chan0.xml	0	0
02/08/2015 12:58	AMAR379.9.20150802T125823Z.wav_chan0.xml	0	0
02/08/2015 13:06	AMAR379.9.20150802T130623Z.wav_chan0.xml	0	0
02/08/2015 13:14	AMAR379.9.20150802T131423Z.wav_chan0.xml	0	0
02/08/2015 13:22	AMAR379.9.20150802T132223Z.wav_chan0.xml	0	0
02/08/2015 13:30	AMAR379.9.20150802T133023Z.wav_chan0.xml	0	0
02/08/2015 13:38	AMAR379.9.20150802T133823Z.wav_chan0.xml	0	0
02/08/2015 13:46	AMAR379.9.20150802T134623Z.wav_chan0.xml	0	0
02/08/2015 13:54	AMAR379.9.20150802T135423Z.wav_chan0.xml	0	0
02/08/2015 14:02	AMAR379.9.20150802T140223Z.wav_chan0.xml	0	0
02/08/2015 14:10	AMAR379.9.20150802T141023Z.wav_chan0.xml	0	0
02/08/2015 14:18	AMAR379.9.20150802T141823Z.wav_chan0.xml	0	0
02/08/2015 14:26	AMAR379.9.20150802T142623Z.wav_chan0.xml	0	0
02/08/2015 14:34	AMAR379.9.20150802T143423Z.wav_chan0.xml	0	0
02/08/2015 14:42	AMAR379.9.20150802T144223Z.wav_chan0.xml	0	0
02/08/2015 14:50	AMAR379.9.20150802T145023Z.wav_chan0.xml	0	0
02/08/2015 14:58	AMAR379.9.20150802T145823Z.wav_chan0.xml	0	0
02/08/2015 15:06	AMAR379.9.20150802T150623Z.wav_chan0.xml	0	0
02/08/2015 15:14	AMAR379.9.20150802T151423Z.wav_chan0.xml	0	0
02/08/2015 15:22	AMAR379.9.20150802T152223Z.wav_chan0.xml	0	0
02/08/2015 15:30	AMAR379.9.20150802T153023Z.wav_chan0.xml	0	0
02/08/2015 15:38	AMAR379.9.20150802T153823Z.wav_chan0.xml	0	0
02/08/2015 15:46	AMAR379.9.20150802T154623Z.wav_chan0.xml	0	0
02/08/2015 15:54	AMAR379.9.20150802T155423Z.wav_chan0.xml	0	0
02/08/2015 16:02	AMAR379.9.20150802T160223Z.wav_chan0.xml	0	0
02/08/2015 16:10	AMAR379.9.20150802T161023Z.wav_chan0.xml	0	0
02/08/2015 16:18	AMAR379.9.20150802T161823Z.wav_chan0.xml	0	0
02/08/2015 16:26	AMAR379.9.20150802T162623Z.wav_chan0.xml	0	0
02/08/2015 16:34	AMAR379.9.20150802T163423Z.wav_chan0.xml	0	0
02/08/2015 16:42	AMAR379.9.20150802T164223Z.wav_chan0.xml	0	0
02/08/2015 16:50	AMAR379.9.20150802T165023Z.wav_chan0.xml	0	0
02/08/2015 16:58	AMAR379.9.20150802T165823Z.wav_chan0.xml	0	0
02/08/2015 17:06	AMAR379.9.20150802T170623Z.wav_chan0.xml	0	0
02/08/2015 17:14	AMAR379.9.20150802T171423Z.wav_chan0.xml	0	0
02/08/2015 17:22	AMAR379.9.20150802T172223Z.wav_chan0.xml	0	0
02/08/2015 17:30	AMAR379.9.20150802T173023Z.wav_chan0.xml	0	0
02/08/2015 17:38	AMAR379.9.20150802T173823Z.wav_chan0.xml	0	0
02/08/2015 17:46	AMAR379.9.20150802T174623Z.wav_chan0.xml	0	0
02/08/2015 17:54	AMAR379.9.20150802T175423Z.wav_chan0.xml	0	0
02/08/2015 18:02	AMAR379.9.20150802T180223Z.wav_chan0.xml	0	0
02/08/2015 18:10	AMAR379.9.20150802T181023Z.wav_chan0.xml	0	0
02/08/2015 18:18	AMAR379.9.20150802T181823Z.wav_chan0.xml	0	0
02/08/2015 18:26	AMAR379.9.20150802T182623Z.wav_chan0.xml	0	0
02/08/2015 18:34	AMAR379.9.20150802T183423Z.wav_chan0.xml	0	0
02/08/2015 18:42	AMAR379.9.20150802T184223Z.wav_chan0.xml	0	0
02/08/2015 18:50	AMAR379.9.20150802T185023Z.wav_chan0.xml	0	0
02/08/2015 18:58	AMAR379.9.20150802T185823Z.wav_chan0.xml	0	0
02/08/2015 19:06	AMAR379.9.20150802T190623Z.wav_chan0.xml	0	0
02/08/2015 19:14	AMAR379.9.20150802T191423Z.wav_chan0.xml	0	0
02/08/2015 19:22	AMAR379.9.20150802T192223Z.wav_chan0.xml	0	0
02/08/2015 19:30	AMAR379.9.20150802T193023Z.wav_chan0.xml	0	0
02/08/2015 19:38	AMAR379.9.20150802T193823Z.wav_chan0.xml	0	0
02/08/2015 19:46	AMAR379.9.20150802T194623Z.wav_chan0.xml	0	0
02/08/2015 19:54	AMAR379.9.20150802T195423Z.wav_chan0.xml	0	0
02/08/2015 20:02	AMAR379.9.20150802T200223Z.wav_chan0.xml	0	0
02/08/2015 20:10	AMAR379.9.20150802T201023Z.wav_chan0.xml	0	0
02/08/2015 20:18	AMAR379.9.20150802T201823Z.wav_chan0.xml	0	0
02/08/2015 20:26	AMAR379.9.20150802T202623Z.wav_chan0.xml	0	0
02/08/2015 20:34	AMAR379.9.20150802T203423Z.wav_chan0.xml	0	0
02/08/2015 20:42	AMAR379.9.20150802T204223Z.wav_chan0.xml	0	0
02/08/2015 20:50	AMAR379.9.20150802T205023Z.wav_chan0.xml	0	0
02/08/2015 20:58	AMAR379.9.20150802T205823Z.wav_chan0.xml	0	0
02/08/2015 21:06	AMAR379.9.20150802T210623Z.wav_chan0.xml	0	0
02/08/2015 21:14	AMAR379.9.20150802T211423Z.wav_chan0.xml	0	0
02/08/2015 21:22	AMAR379.9.20150802T212223Z.wav_chan0.xml	0	0
02/08/2015 21:30	AMAR379.9.20150802T213023Z.wav_chan0.xml	0	0
02/08/2015 21:38	AMAR379.9.20150802T213823Z.wav_chan0.xml	0	0
02/08/2015 21:46	AMAR379.9.20150802T214623Z.wav_chan0.xml	0	0
02/08/2015 21:54	AMAR379.9.20150802T215423Z.wav_chan0.xml	0	0
02/08/2015 22:02	AMAR379.9.20150802T220223Z.wav_chan0.xml	0	0
02/08/2015 22:10	AMAR379.9.20150802T221023Z.wav_chan0.xml	0	0
02/08/2015 22:18	AMAR379.9.20150802T221823Z.wav_chan0.xml	0	0
02/08/2015 22:26	AMAR379.9.20150802T222623Z.wav_chan0.xml	0	0
02/08/2015 22:34	AMAR379.9.20150802T223423Z.wav_chan0.xml	0	0
02/08/2015 22:42	AMAR379.9.20150802T224223Z.wav_chan0.xml	0	0
02/08/2015 22:50	AMAR379.9.20150802T225023Z.wav_chan0.xml	0	0
02/08/2015 22:58	AMAR379.9.20150802T225823Z.wav_chan0.xml	0	0
02/08/2015 23:06	AMAR379.9.20150802T230623Z.wav_chan0.xml	0	0
02/08/2015 23:14	AMAR379.9.20150802T231423Z.wav_chan0.xml	0	0
02/08/2015 23:22	AMAR379.9.20150802T232223Z.wav_chan0.xml	0	0
02/08/2015 23:30	AMAR379.9.20150802T233023Z.wav_chan0.xml	0	0
02/08/2015 23:38	AMAR379.9.20150802T233823Z.wav_chan0.xml	0	0
02/08/2015 23:46	AMAR379.9.20150802T234623Z.wav_chan0.xml	0	0
02/08/2015 23:54	AMAR379.9.20150802T235423Z.wav_chan0.xml	0	0
02/07/2015 0:02	AMAR379.9.20150702T000223Z.wav_chan0.xml	0	0
02/07/2015 0:10	AMAR379.9.20150702T001023Z.wav_chan0.xml	0	0
02/07/2015 0:18	AMAR379.9.20150702T001823Z.wav_chan0.xml	0	0
02/07/2015 0:26	AMAR379.9.20150702T002623Z.wav_chan0.xml	0	0
02/07/2015 0:34	AMAR379.9.20150702T003423Z.wav_chan0.xml	0	0
02/07/2015 0:42	AMAR379.9.20150702T004223Z.wav_chan0.xml	0	0
02/07/2015 0:50	AMAR379.9.20150702T005023Z.wav_chan0.xml	0	0
02/07/2015 0:58	AMAR379.9.20150702T005823Z.wav_chan0.xml	0	0
02/07/2015 1:06	AMAR379.9.20150702T010623Z.wav_chan0.xml	0	0
02/07/2015 1:14	AMAR379.9.20150702T011423Z.wav_chan0.xml	0	0
02/07/2015 1:22	AMAR379.9.20150702T012223Z.wav_chan0.xml	0	0
02/07/2015 1:30	AMAR379.9.20150702T013023Z.wav_chan0.xml	0	0
02/07/2015 1:38	AMAR379.9.20150702T013823Z.wav_chan0.xml	0	0
02/07/2015 1:46	AMAR379.9.20150702T014623Z.wav_chan0.xml	0	0
02/07/2015 1:54	AMAR379.9.20150702T015423Z.wav_chan0.xml	0	0
02/07/2015 2:02	AMAR379.9.20150702T020223Z.wav_chan0.xml	0	0
02/07/2015 2:10	AMAR379.9.20150702T021023Z.wav_chan0.xml	0	0
02/07/2015 2:18	AMAR379.9.20150702T021823Z.wav_chan0.xml	0	0
02/07/2015 2:26	AMAR379.9.20150702T022623Z.wav_chan0.xml	0	0
02/07/2015 2:34	AMAR379.9.20150702T023423Z.wav_chan0.xml	0	0
02/07/2015 2:42	AMAR379.9.20150702T024223Z.wav_chan0.xml	0	0
02/07/2015 2:50	AMAR379.9.20150702T025023Z.wav_chan0.xml	0	0
02/07/2015 2:58	AMAR379.9.20150702T025823Z.wav_chan0.xml	0	0
02/07/2015 3:06	AMAR379.9.20150702T030623Z.wav_chan0.xml	0	0
02/07/2015 3:14	AMAR379.9.20150702T031423Z.wav_chan0.xml	0	0
02/07/2015 3:22	AMAR379.9.20150702T032223Z.wav_chan0.xml	0	0
02/07/2015 3:30	AMAR379.9.20150702T033023Z.wav_chan0.xml	0	0
02/07/2015 3:38	AMAR379.9.20150702T033823Z.wav_chan0.xml	0	0
02/07/2015 3:46	AMAR379.9.20150702T034623Z.wav_chan0.xml	0	0
02/07/2015 3:54	AMAR379.9.20150702T035423Z.wav_chan0.xml	0	0
02/07/2015 4:02	AMAR379.9.20150702T040223Z.wav_chan0.xml	0	0
02/07/2015 4:10	AMAR379.9.20150702T041023Z.wav_chan0.xml	0	0
02/07/2015 4:18	AMAR379.9.20150702T041823Z.wav_chan0.xml	0	0
02/07/2015 4:26	AMAR379.9.20150702T042623Z.wav_chan0.xml	0	0
02/07/2015 4:34	AMAR379.9.20150702T043423Z.wav_chan0.xml	0	0
02/07/2015 4:42	AMAR379.9.20150702T044223Z.wav_chan0.xml	0	0
02/07/2015 4:50	AMAR379.9.20150702T045023Z.wav_chan0.xml	0	0
02/07/2015 4:58	AMAR379.9.20150702T045823Z.wav_chan0.xml	0	0
02/07/2015 5:06	AMAR379.9.20150702T050623Z.wav_chan0.xml	0	0
02/07/2015 5:14	AMAR379.9.20150702T051423Z.wav_chan0.xml	0	0
02/07/2015 5:22	AMAR379.9.20150702T052223Z.wav_chan0.xml	0	0
02/07/2015 5:30	AMAR379.9.20150702T053023Z.wav_chan0.xml	0	0
02/07/2015 5:38	AMAR379.9.20150702T053823Z.wav_chan0.xml	0	0
02/07/2015 5:46	AMAR379.9.20150702T054623Z.wav_chan0.xml	0	0
02/07/2015 5:54	AMAR379.9.20150702T055423Z.wav_chan0.xml	0	0
02/07/2015 6:02	AMAR379.9.20150702T060223Z.wav_chan0.xml	0	0
02/07/2015 6:10	AMAR379.9.20150702T061023Z.wav_chan0.xml	0	0
02/07/2015 6:18	AMAR379.9.20150702T061823Z.wav_chan0.xml	0	0
02/07/2015 6:26	AMAR379.9.20150702T062623Z.wav_chan0.xml	0	0
02/07/2015 6:34	AMAR379.9.20150702T063423Z.wav_chan0.xml	0	0
02/07/2015 6:42	AMAR379.9.20150702T064223Z.wav_chan0.xml	0	0
02/07/2015 6:50	AMAR379.9.20150702T065023Z.wav_chan0.xml	0	0
02/07/2015 6:58	AMAR379.9.20150702T065823Z.wav_chan0.xml	0	0
02/07/2015 7:06	AMAR379.9.20150702T070623Z.wav_chan0.xml	0	0
02/07/2015 7:14	AMAR379.9.20150702T071423Z.wav_chan0.xml	0	0
02/07/2015 7:22	AMAR379.9.20150702T072223Z.wav_chan0.xml	0	0
02/07/2015 7:30	AMAR379.9.20150702T073023Z.wav_chan0.xml	0	0
02/07/2015 7:38	AMAR379.9.20150702T073823Z.wav_chan0.xml	0	0
02/07/2015 7:46	AMAR379.9.20150702T074623Z.wav_chan0.xml	0	0
02/07/2015 7:54	AMAR379.9.20150702T075423Z.wav_chan0.xml	0	0
02/07/2015 8:02	AMAR379.9.20150702T080223Z.wav_chan0.xml	0	0
02/07/2015 8:10	AMAR379.9.20150702T081023Z.wav_chan0.xml	0	0
02/07/2015 8:18	AMAR379.9.20150702T081823Z.wav_chan0.xml	0	0
02/07/2015 8:26	AMAR379.9.20150702T082623Z.wav_chan0.xml	0	0
02/07/2015 8:34	AMAR379.9.20150702T083423Z.wav_chan0.xml	0	0
02/07/2015 8:42	AMAR379.9.20150702T084223Z.wav_chan0.xml	0	0
02/07/2015 8:50	AMAR379.9.20150702T085023Z.wav_chan0.xml	0	0
02/07/2015 8:58	AMAR379.9.20150702T085823Z.wav_chan0.xml	0	0
02/07/2015 9:06	AMAR379.9.20150702T090623Z.wav_chan0.xml	0	0
02/07/2015 9:14	AMAR379.9.20150702T091423Z.wav_chan0.xml	0	0
02/07/2015 9:22	AMAR379.9.20150702T092223Z.wav_chan0.xml	0	0
02/07/2015 9:30	AMAR379.9.20150702T093023Z.wav_chan0.xml	0	0
02/07/2015 9:38	AMAR379.9.20150702T093823Z.wav_chan0.xml	0	0
02/07/2015 9:46	AMAR379.9.20150702T094623Z.wav_chan0.xml	0	0
02/07/2015 9:54	AMAR379.9.20150702T095423Z.wav_chan0.xml	0	0
02/07/2015 10:02	AMAR379.9.20150702T100223Z.wav_chan0.xml	0	0
02/07/2015 10:10	AMAR379.9.20150702T101023Z.wav_chan0.xml	0	0
02/07/2015 10:18	AMAR379.9.20150702T101823Z.wav_chan0.xml	0	0
02/07/2015 10:26	AMAR379.9.20150702T102623Z.wav_chan0.xml	0	0
02/07/2015 10:34	AMAR379.9.20150702T103423Z.wav_chan0.xml	0	0
02/07/2015 10:42	AMAR379.9.20150702T104223Z.wav_chan0.xml	0	0
02/07/2015 10:50	AMAR379.9.20150702T105023Z.wav_chan0.xml	0	0
02/07/2015 10:58	AMAR379.9.20150702T105823Z.wav_chan0.xml	0	0
02/07/2015 11:06	AMAR379.9.20150702T110623Z.wav_chan0.xml	0	0
02/07/2015 11:14	AMAR379.9.20150702T111423Z.wav_chan0.xml	0	0
02/07/2015 11:22	AMAR379.9.20150702T112223Z.wav_chan0.xml	0	0
02/07/2015 11:30	AMAR379.9.20150702T113023Z.wav_chan0.xml	0	0
02/07/2015 11:38	AMAR379.9.20150702T113823Z.wav_chan0.xml	0	0
02/07/2015 11:46	AMAR379.9.20150702T114623Z.wav_chan0.xml	0	0
02/07/2015 11:54	AMAR379.9.20150702T115423Z.wav_chan0.xml	0	0
02/07/2015 12:02	AMAR379.9.20150702T120223Z.wav_chan0.xml	0	0
02/07/2015 12:10	AMAR379.9.20150702T121023Z.wav_chan0.xml	0	0
02/07/2015 12:18	AMAR379.9.20150702T121823Z.wav_chan0.xml	0	0
02/07/2015 12:26	AMAR379.9.20150702T122623Z.wav_chan0.xml	0	0
02/07/2015 12:34	AMAR379.9.20150702T123423Z.wav_chan0.xml	0	0
02/07/2015 12:42	AMAR379.9.20150702T124223Z.wav_chan0.xml	0	0
02/07/2015 12:50	AMAR379.9.20150702T125023Z.wav_chan0.xml	0	0
02/07/2015 12:58	AMAR379.9.20150702T125823Z.wav_chan0.xml	0	0
02/07/2015 13:06	AMAR379.9.20150702T130623Z.wav_chan0.xml	0	0
02/07/2015 13:14	AMAR379.9.20150702T131423Z.wav_chan0.xml	0	0
02/07/2015 13:22	AMAR379.9.20150702T132223Z.wav_chan0.xml	0	0
02/07/2015 13:30	AMAR379.9.20150702T133023Z.wav_chan0.xml	0	0
02/07/2015 13:38	AMAR379.9.20150702T133823Z.wav_chan0.xml	0	0
02/07/2015 13:46	AMAR379.9.20150702T134623Z.wav_chan0.xml	0	0
02/07/2015 13:54	AMAR379.9.20150702T135423Z.wav_chan0.xml	0	0
02/07/2015 14:02	AMAR379.9.20150702T140223Z.wav_chan0.xml	0	0
02/07/2015 14:10	AMAR379.9.20150702T141023Z.wav_chan0.xml	0	0
02/07/2015 14:18	AMAR379.9.20150702T141823Z.wav_chan0.xml	0	0
02/07/2015 14:26	AMAR379.9.20150702T142623Z.wav_chan0.xml	0	0
02/07/2015 14:34	AMAR379.9.20150702T143423Z.wav_chan0.xml	0	0
02/07/2015 14:42	AMAR379.9.20150702T144223Z.wav_chan0.xml	0	0
02/07/2015 14:50	AMAR379.9.20150702T145023Z.wav_chan0.xml	0	0
02/07/2015 14:58	AMAR379.9.20150702T145823Z.wav_chan0.xml	0	0
02/07/2015 15:06	AMAR379.9.20150702T150623Z.wav_chan0.xml	0	0
02/07/2015 15:14	AMAR379.9.20150702T151423Z.wav_chan0.xml	0	0
02/07/2015 15:22	AMAR379.9.20150702T152223Z.wav_chan0.xml	0	0
02/07/2015 15:30	AMAR379.9.20150702T153023Z.wav_chan0.xml	0	0
02/07/2015 15:38	AMAR379.9.20150702T153823Z.wav_chan0.xml	0	0
02/07/2015 15:46	AMAR379.9.20150702T154623Z.wav_chan0.xml	0	0
02/07/2015 15:54	AMAR379.9.20150702T155423Z.wav_chan0.xml	0	0
02/07/2015 16:02	AMAR379.9.20150702T160223Z.wav_chan0.xml	0	0
02/07/2015 16:10	AMAR379.9.20150702T161023Z.wav_chan0.xml	0	0
02/07/2015 16:18	AMAR379.9.20150702T161823Z.wav_chan0.xml	0	0
02/07/2015 16:26	AMAR379.9.20150702T162623Z.wav_chan0.xml	0	0
02/07/2015 16:34	AMAR379.9.20150702T163423Z.wav_chan0.xml	0	0
02/07/2015 16:42	AMAR379.9.20150702T164223Z.wav_chan0.xml	0	0
02/07/2015 16:50	AMAR379.9.20150702T165023Z.wav_chan0.xml	0	0
02/07/2015 16:58	AMAR379.9.20150702T165823Z.wav_chan0.xml	0	0
02/07/2015 17:06	AMAR379.9.20150702T170623Z.wav_chan0.xml	0	0
02/07/2015 17:14	AMAR379.9.20150702T171423Z.wav_chan0.xml	0	0
02/07/2015 17:22	AMAR379.9.20150702T172223Z.wav_chan0.xml	0	0
02/07/2015 17:30	AMAR379.9.20150702T173023Z.wav_chan0.xml	0	0
02/07/2015 17:38	AMAR379.9.20150702T173823Z.wav_chan0.xml	0	0
02/07/2015 17:46	AMAR379.9.20150702T174623Z.wav_chan0.xml	0	0
02/07/2015 17:54	AMAR379.9.20150702T175423Z.wav_chan0.xml	0	0
02/07/2015 18:02	AMAR379.9.20150702T180223Z.wav_chan0.xml	0	0
02/07/2015 18:10	AMAR379.9.20150702T181023Z.wav_chan0.xml	0	0
02/07/2015 18:18	AMAR379.9.20150702T181823Z.wav_chan0.xml	0	0
02/07/2015 18:26	AMAR379.9.20150702T182623Z.wav_chan0.xml	0	0
02/07/2015 18:34	AMAR379.9.20150702T183423Z.wav_chan0.xml	0	0
02/07/2015 18:42	AMAR379.9.20150702T184223Z.wav_chan0.xml	0	0
02/07/2015 18:50	AMAR379.9.20150702T185023Z.wav_chan0.xml	0	0
02/07/2015 18:58	AMAR379.9.20150702T185823Z.wav_chan0.xml	0	0
02/07/2015 19:06	AMAR379.9.20150702T190623Z.wav_chan0.xml	0	0
02/07/2015 19:14	AMAR379.9.20150702T191423Z.wav_chan0.xml	0	0
02/07/2015 19:22	AMAR379.9.20150702T192223Z.wav_chan0.xml	0	0
02/07/2015 19:30	AMAR379.9.20150702T193023Z.wav_chan0.xml	0	0
02/07/2015 19:38	AMAR379.9.20150702T193823Z.wav_chan0.xml	0	0
02/07/2015 19:46	AMAR379.9.20150702T194623Z.wav_chan0.xml	0	0
02/07/2015 19:54	AMAR379.9.20150702T195423Z.wav_chan0.xml	0	0
02/07/2015 20:02	AMAR379.9.20150702T200223Z.wav_chan0.xml	0	0
02/07/2015 20:10	AMAR379.9.20150702T201023Z.wav_chan0.xml	0	0
02/07/2015 20:18	AMAR379.9.20150702T201823Z.wav_chan0.xml	0	0
02/07/2015 20:26	AMAR379.9.20150702T202623Z.wav_chan0.xml	0	0
02/07/2015 20:34	AMAR379.9.20150702T203423Z.wav_chan0.xml	0	0
02/07/2015 20:42	AMAR379.9.20150702T204223Z.wav_chan0.xml	0	0
02/07/2015 20:50	AMAR379.9.20150702T205023Z.wav_chan0.xml	0	0
02/07/2015 20:58	AMAR379.9.20150702T205823Z.wav_chan0.xml	0	0
02/07/2015 21:06	AMAR379.9.20150702T210623Z.wav_chan0.xml	0	0
02/07/2015 21:14	AMAR379.9.20150702T211423Z.wav_chan0.xml	0	0
02/07/2015 21:22	AMAR379.9.20150702T212223Z.wav_chan0.xml	0	0
02/07/2015 21:30	AMAR379.9.20150702T213023Z.wav_chan0.xml	0	0
02/07/2015 21:38	AMAR379.9.20150702T213823Z.wav_chan0.xml	0	0
02/07/2015 21:46	AMAR379.9.20150702T214623Z.wav_chan0.xml	0	0
02/07/2015 21:54	AMAR379.9.20150702T215423Z.wav_chan0.xml	0	0
02/07/2015 22:02	AMAR379.9.20150702T220223Z.wav_chan0.xml	0	0
02/07/2015 22:10	AMAR379.9.20150702T221023Z.wav_chan0.xml	0	0
02/07/2015 22:18	AMAR379.9.20150702T221823Z.wav_chan0.xml	0	0
02/07/2015 22:26	AMAR379.9.20150702T222623Z.wav_chan0.xml	0	0
02/07/2015 22:34	AMAR379.9.20150702T223423Z.wav_chan0.xml	0	0
02/07/2015 22:42	AMAR379.9.20150702T224223Z.wav_chan0.xml	0	0
02/07/2015 22:50	AMAR379.9.20150702T225023Z.wav_chan0.xml	0	0
02/07/2015 22:58	AMAR379.9.20150702T225823Z.wav_chan0.xml	0	0
02/07/2015 23:06	AMAR379.9.20150702T230623Z.wav_chan0.xml	0	0
02/07/2015 23:14	AMAR379.9.20150702T231423Z.wav_chan0.xml	0	0
02/07/2015 23:22	AMAR379.9.20150702T232223Z.wav_chan0.xml	0	0
02/07/2015 23:30	AMAR379.9.20150702T233023Z.wav_chan0.xml	0	0
02/07/2015 23:38	AMAR379.9.20150702T233823Z.wav_chan0.xml	0	0
02/07/2015 23:46	AMAR379.9.20150702T234623Z.wav_chan0.xml	0	0
02/07/2015 23:54	AMAR379.9.20150702T235423Z.wav_chan0.xml	0	0
02/06/2015 0:02	AMAR379.9.20150602T000223Z.wav_chan0.xml	0	0
02/06/2015 0:10	AMAR379.9.20150602T001023Z.wav_chan0.xml	0	0
02/06/2015 0:18	AMAR379.9.20150602T001823Z.wav_chan0.xml	0	0
02/06/2015 0:26	AMAR379.9.20150602T002623Z.wav_chan0.xml	0	0
02/06/2015 0:34	AMAR379.9.20150602T003423Z.wav_chan0.xml	0	0
02/06/2015 0:42	AMAR379.9.20150602T004223Z.wav_chan0.xml	0	0
02/06/2015 0:50	AMAR379.9.20150602T005023Z.wav_chan0.xml	0	0
02/06/2015 0:58	AMAR379.9.20150602T005823Z.wav_chan0.xml	0	0
02/06/2015 1:06	AMAR379.9.20150602T010623Z.wav_chan0.xml	0	0
02/06/2015 1:14	AMAR379.9.20150602T011423Z.wav_chan0.xml	0	0
02/06/2015 1:22	AMAR379.9.20150602T012223Z.wav_chan0.xml	0	0
02/06/2015 1:30	AMAR379.9.20150602T013023Z.wav_chan0.xml	0	0
02/06/2015 1:38	AMAR379.9.20150602T013823Z.wav_chan0.xml	0	0
02/06/2015 1:46	AMAR379.9.20150602T014623Z.wav_chan0.xml	0	0
02/06/2015 1:54	AMAR379.9.20150602T015423Z.wav_chan0.xml	0	0
02/06/2015 2:02	AMAR379.9.20150602T020223Z.wav_chan0.xml	0	0
02/06/2015 2:10	AMAR379.9.20150602T021023Z.wav_chan0.xml	0	0
02/06/2015 2:18	AMAR379.9.20150602T021823Z.wav_chan0.xml	0	0
02/06/2015 2:26	AMAR379.9.20150602T022623Z.wav_chan0.xml	0	0
02/06/2015 2:34	AMAR379.9.20150602T023423Z.wav_chan0.xml	0	0
02/06/2015 2:42	AMAR379.9.20150602T024223Z.wav_chan0.xml	0	0
02/06/2015 2:50	AMAR379.9.20150602T025023Z.wav_chan0.xml	0	0
02/06/2015 2:58	AMAR379.9.20150602T025823Z.wav_chan0.xml	0	0
02/06/2015 3:06	AMAR379.9.20150602T030623Z.wav_chan0.xml	0	0
02/06/2015 3:14	AMAR379.9.20150602T031423Z.wav_chan0.xml	0	0
02/06/2015 3:22	AMAR379.9.20150602T032223Z.wav_chan0.xml	0	0
02/06/2015 3:30	AMAR379.9.20150602T033023Z.wav_chan0.xml	0	0
02/06/2015 3:38	AMAR379.9.20150602T033823Z.wav_chan0.xml	0	0
02/06/2015 3:46	AMAR379.9.20150602T034623Z.wav_chan0.xml	0	0
02/06/2015 3:54	AMAR379.9.20150602T035423Z.wav_chan0.xml	0	0
02/06/2015 4:02	AMAR379.9.20150602T040223Z.wav_chan0.xml	0	0
02/06/2015 4:10	AMAR379.9.20150602T041023Z.wav_chan0.xml	0	0
02/06/2015 4:18	AMAR379.9.20150602T041823Z.wav_chan0.xml	0	0
02/06/2015 4:26	AMAR379.9.20150602T042623Z.wav_chan0.xml	0	0
02/06/2015 4:34	AMAR379.9.20150602T043423Z.wav_chan0.xml	0	0
02/06/2015 4:42	AMAR379.9.20150602T044223Z.wav_chan0.xml	0	0
02/06/2015 4:50	AMAR379.9.20150602T045023Z.wav_chan0.xml	0	0
02/06/2015 4:58	AMAR379.9.20150602T045823Z.wav_chan0.xml	0	0
02/06/2015 5:06	AMAR379.9.20150602T050623Z.wav_chan0.xml	0	0
02/06/2015 5:14	AMAR379.9.20150602T051423Z.wav_chan0.xml	0	0
02/06/2015 5:22	AMAR379.9.20150602T052223Z.wav_chan0.xml	0	0
02/06/2015 5:30	AMAR379.9.20150602T053023Z.wav_chan0.xml	0	0
02/06/2015 5:38	AMAR379.9.20150602T053823Z.wav_chan0.xml	0	0
02/06/2015 5:46	AMAR379.9.20150602T054623Z.wav_chan0.xml	0	0
02/06/2015 5:54	AMAR379.9.20150602T055423Z.wav_chan0.xml	0	0
02/06/2015 6:02	AMAR379.9.20150602T060223Z.wav_chan0.xml	0	0
02/06/2015 6:10	AMAR379.9.20150602T061023Z.wav_chan0.xml	0	0
02/06/2015 6:18	AMAR379.9.20150602T061823Z.wav_chan0.xml	0	0
02/06/2015 6:26	AMAR379.9.20150602T062623Z.wav_chan0.xml	0	0
02/06/2015 6:34	AMAR379.9.20150602T063423Z.wav_chan0.xml	0	0
02/06/2015 6:42	AMAR379.9.20150602T064223Z.wav_chan0.xml	0	0
02/06/2015 6:50	AMAR379.9.20150602T065023Z.wav_chan0.xml	0	0
02/06/2015 6:58	AMAR379.9.20150602T065823Z.wav_chan0.xml	0	0
02/06/2015 7:06	AMAR379.9.20150602T070623Z.wav_chan0.xml	0	0
02/06/2015 7:14	AMAR379.9.20150602T071423Z.wav_chan0.xml	0	0
02/06/2015 7:22	AMAR379.9.20150602T072223Z.wav_chan0.xml	0	0
02/06/2015 7:30	AMAR379.9.20150602T073023Z.wav_chan0.xml	0	0
02/06/2015 7:38	AMAR379.9.20150602T073823Z.wav_chan0.xml	0	0
02/06/2015 7:46	AMAR379.9.20150602T074623Z.wav_chan0.xml	0	0
02/06/2015 7:54	AMAR379.9.20150602T075423Z.wav_chan0.xml	0	0
02/06/2015 8:02	AMAR379.9.20150602T080223Z.wav_chan0.xml	0	0
02/06/2015 8:10	AMAR379.9.20150602T081023Z.wav_chan0.xml	0	0
02/06/2015 8:18	AMAR379.9.20150602T081823Z.wav_chan0.xml	0	0
02/06/2015 8:26	AMAR379.9.20150602T082623Z.wav_chan0.xml	0	0
02/06/2015 8:34	AMAR379.9.20150602T083423Z.wav_chan0.xml	0	0
02/06/2015 8:42	AMAR379.9.20150602T084223Z.wav_chan0.xml	0	0
02/06/2015 8:50	AMAR379.9.20150602T085023Z.wav_chan0.xml	0	0
02/06/2015 8:58	AMAR379.9.20150602T085823Z.wav_chan0.xml	0	0
02/06/2015 9:06	AMAR379.9.20150602T090623Z.wav_chan0.xml	0	0
02/06/2015 9:14	AMAR379.9.20150602T091423Z.wav_chan0.xml	0	0
02/06/2015 9:22	AMAR379.9.20150602T092223Z.wav_chan0.xml	0	0
02/06/2015 9:30	AMAR379.9.20150602T093023Z.wav_chan0.xml	0	0
02/06/2015 9:38	AMAR379.9.20150602T093823Z.wav_chan0.xml	0	0
02/06/2015 9:46	AMAR379.9.20150602T094623Z.wav_chan0.xml	0	0
02/06/2015 9:54	AMAR379.9.20150602T095423Z.wav_chan0.xml	0	0
02/06/2015 10:02	AMAR379.9.20150602T100223Z.wav_chan0.xml	0	0
02/06/2015 10:10	AMAR379.9.20150602T101023Z.wav_chan0.xml	0	0
02/06/2015 10:18	AMAR379.9.20150602T101823Z.wav_chan0.xml	0	0
02/06/2015 10:26	AMAR379.9.20150602T102623Z.wav_chan0.xml	0	0
02/06/2015 10:34	AMAR379.9.20150602T103423Z.wav_chan0.xml	0	0
02/06/2015 10:42	AMAR379.9.20150602T104223Z.wav_chan0.xml	0	0
02/06/2015 10:50	AMAR379.9.20150602T105023Z.wav_chan0.xml	0	0
02/06/2015 10:58	AMAR379.9.20150602T105823Z.wav_chan0.xml	0	0
02/06/2015 11:06	AMAR379.9.20150602T110623Z.wav_chan0.xml	0	0
02/06/2015 11:14	AMAR379.9.20150602T111423Z.wav_chan0.xml	0	0
02/06/2015 11:22	AMAR379.9.20150602T112223Z.wav_chan0.xml	0	0
02/06/2015 11:30	AMAR379.9.20150602T113023Z.wav_chan0.xml	0	0
02/06/2015 11:38	AMAR379.9.20150602T113823Z.wav_chan0.xml	0	0
02/06/2015 11:46	AMAR379.9.20150602T114623Z.wav_chan0.xml	0	0
02/06/2015 11:54	AMAR379.9.20150602T115423Z.wav_chan0.xml	0	0
02/06/2015 12:02	AMAR379.9.20150602T120223Z.wav_chan0.xml	0	0
02/06/2015 12:10	AMAR379.9.20150602T121023Z.wav_chan0.xml	0	0
02/06/2015 12:18	AMAR379.9.20150602T121823Z.wav_chan0.xml	0	0
02/06/2015 12:26	AMAR379.9.20150602T122623Z.wav_chan0.xml	0	0
02/06/2015 12:34	AMAR379.9.20150602T123423Z.wav_chan0.xml	0	0
02/06/2015 12:42	AMAR379.9.20150602T124223Z.wav_chan0.xml	0	0
02/06/2015 12:50	AMAR379.9.20150602T125023Z.wav_chan0.xml	0	0
02/06/2015 12:58	AMAR379.9.20150602T125823Z.wav_chan0.xml	0	0
02/06/2015 13:06	AMAR379.9.20150602T130623Z.wav_chan0.xml	0	0
02/06/2015 13:14	AMAR379.9.20150602T131423Z.wav_chan0.xml	0	0
02/06/2015 13:22	AMAR379.9.20150602T132223Z.wav_chan0.xml	0	0
02/06/2015 13:30	AMAR379.9.20150602T133023Z.wav_chan0.xml	0	0
02/06/2015 13:38	AMAR379.9.20150602T133823Z.wav_chan0.xml	0	0
02/06/2015 13:46	AMAR379.9.20150602T134623Z.wav_chan0.xml	0	0
02/06/2015 13:54	AMAR379.9.20150602T135423Z.wav_chan0.xml	0	0
02/06/2015 14:02	AMAR379.9.20150602T140223Z.wav_chan0.xml	0	0
02/06/2015 14:10	AMAR379.9.20150602T141023Z.wav_chan0.xml	0	0
02/06/2015 14:18	AMAR379.9.20150602T141823Z.wav_chan0.xml	0	0
02/06/2015 14:26	AMAR379.9.20150602T142623Z.wav_chan0.xml	0	0
02/06/2015 14:34	AMAR379.9.20150602T143423Z.wav_chan0.xml	0	0
02/06/2015 14:42	AMAR379.9.20150602T144223Z.wav_chan0.xml	0	0
02/06/2015 14:50	AMAR379.9.20150602T145023Z.wav_chan0.xml	0	0
02/06/2015 14:58	AMAR379.9.20150602T145823Z.wav_chan0.xml	0	0
02/06/2015 15:06	AMAR379.9.20150602T150623Z.wav_chan0.xml	0	0
02/06/2015 15:14	AMAR379.9.20150602T151423Z.wav_chan0.xml	0	0
02/06/2015 15:22	AMAR379.9.20150602T152223Z.wav_chan0.xml	0	0
02/06/2015 15:30	AMAR379.9.20150602T153023Z.wav_chan0.xml	0	0
02/06/2015 15:38	AMAR379.9.20150602T153823Z.wav_chan0.xml	0	0
02/06/2015 15:46	AMAR379.9.20150602T154623Z.wav_chan0.xml	0	0
02/06/2015 15:54	AMAR379.9.20150602T155423Z.wav_chan0.xml	0	0
02/06/2015 16:02	AMAR379.9.20150602T160223Z.wav_chan0.xml	0	0
02/06/2015 16:10	AMAR379.9.20150602T161023Z.wav_chan0.xml	0	0
02/06/2015 16:18	AMAR379.9.20150602T161823Z.wav_chan0.xml	0	0
02/06/2015 16:26	AMAR379.9.20150602T162623Z.wav_chan0.xml	0	0
02/06/2015 16:34	AMAR379.9.20150602T163423Z.wav_chan0.xml	0	0
02/06/2015 16:42	AMAR379.9.20150602T164223Z.wav_chan0.xml	0	0
02/06/2015 16:50	AMAR379.9.20150602T165023Z.wav_chan0.xml	0	0
02/06/2015 16:58	AMAR379.9.20150602T165823Z.wav_chan0.xml	0	0
02/06/2015 17:06	AMAR379.9.20150602T170623Z.wav_chan0.xml	0	0
02/06/2015 17:14	AMAR379.9.20150602T171423Z.wav_chan0.xml	0	0
02/06/2015 17:22	AMAR379.9.20150602T172223Z.wav_chan0.xml	0	0
02/06/2015 17:30	AMAR379.9.20150602T173023Z.wav_chan0.xml	0	0
02/06/2015 17:38	AMAR379.9.20150602T173823Z.wav_chan0.xml	0	0
02/06/2015 17:46	AMAR379.9.20150602T174623Z.wav_chan0.xml	0	0
02/06/2015 17:54	AMAR379.9.20150602T175423Z.wav_chan0.xml	0	0
02/06/2015 18:02	AMAR379.9.20150602T180223Z.wav_chan0.xml	0	0
02/06/2015 18:10	AMAR379.9.20150602T181023Z.wav_chan0.xml	0	0
02/06/2015 18:18	AMAR379.9.20150602T181823Z.wav_chan0.xml	0	0
02/06/2015 18:26	AMAR379.9.20150602T182623Z.wav_chan0.xml	0	0
02/06/2015 18:34	AMAR379.9.20150602T183423Z.wav_chan0.xml	0	0
02/06/2015 18:42	AMAR379.9.20150602T184223Z.wav_chan0.xml	0	0
02/06/2015 18:50	AMAR379.9.20150602T185023Z.wav_chan0.xml	0	0
02/06/2015 18:58	AMAR379.9.20150602T185823Z.wav_chan0.xml	0	0
02/06/2015 19:06	AMAR379.9.20150602T190623Z.wav_chan0.xml	0	0
02/06/2015 19:14	AMAR379.9.20150602T191423Z.wav_chan0.xml	0	0
02/06/2015 19:22	AMAR379.9.20150602T192223Z.wav_chan0.xml	0	0
02/06/2015 19:30	AMAR379.9.20150602T193023Z.wav_chan0.xml	0	0
02/06/2015 19:38	AMAR379.9.20150602T193823Z.wav_chan0.xml	0	0
02/06/2015 19:46	AMAR379.9.20150602T194623Z.wav_chan0.xml	0	0
02/06/2015 19:54	AMAR379.9.20150602T195423Z.wav_chan0.xml	0	0
02/06/2015 20:02	AMAR379.9.20150602T200223Z.wav_chan0.xml	0	0
02/06/2015 20:10	AMAR379.9.20150602T201023Z.wav_chan0.xml	0	0
02/06/2015 20:18	AMAR379.9.20150602T201823Z.wav_chan0.xml	0	0
02/06/2015 20:26	AMAR379.9.20150602T202623Z.wav_chan0.xml	0	0
02/06/2015 20:34	AMAR379.9.20150602T203423Z.wav_chan0.xml	0	0
02/06/2015 20:42	AMAR379.9.20150602T204223Z.wav_chan0.xml	0	0
02/06/2015 20:50	AMAR379.9.20150602T205023Z.wav_chan0.xml	0	0
02/06/2015 20:58	AMAR379.9.20150602T205823Z.wav_chan0.xml	0	0
02/06/2015 21:06	AMAR379.9.20150602T210623Z.wav_chan0.xml	0	0
02/06/2015 21:14	AMAR379.9.20150602T211423Z.wav_chan0.xml	0	0
02/06/2015 21:22	AMAR379.9.20150602T212223Z.wav_chan0.xml	0	0
02/06/2015 21:30	AMAR379.9.20150602T213023Z.wav_chan0.xml	0	0
02/06/2015 21:38	AMAR379.9.20150602T213823Z.wav_chan0.xml	0	0
02/06/2015 21:46	AMAR379.9.20150602T214623Z.wav_chan0.xml	0	0
02/06/2015 21:54	AMAR379.9.20150602T215423Z.wav_chan0.xml	0	0
02/06/2015 22:02	AMAR379.9.20150602T220223Z.wav_chan0.xml	0	0
02/06/2015 22:10	AMAR379.9.20150602T221023Z.wav_chan0.xml	0	0
02/06/2015 22:18	AMAR379.9.20150602T221823Z.wav_chan0.xml	0	0
02/06/2015 22:26	AMAR379.9.20150602T222623Z.wav_chan0.xml	0	0
02/06/2015 22:34	AMAR379.9.20150602T223423Z.wav_chan0.xml	0	0
02/06/2015 22:42	AMAR379.9.20150602T224223Z.wav_chan0.xml	0	0
02/06/2015 22:50	AMAR379.9.20150602T225023Z.wav_chan0.xml	0	0
02/06/2015 22:58	AMAR379.9.20150602T225823Z.wav_chan0.xml	0	0
02/06/2015 23:06	AMAR379.9.20150602T230623Z.wav_chan0.xml	0	0
02/06/2015 23:14	AMAR379.9.20150602T231423Z.wav_chan0.xml	0	0
02/06/2015 23:22	AMAR379.9.20150602T232223Z.wav_chan0.xml	0	0
02/06/2015 23:30	AMAR379.9.20150602T233023Z.wav_chan0.xml	0	0
02/06/2015 23:38	AMAR379.9.20150602T233823Z.wav_chan0.xml	0	0
02/06/2015 23:46	AMAR379.9.20150602T234623Z.wav_chan0.xml	0	0
02/06/2015 23:54	AMAR379.9.20150602T235423Z.wav_chan0.xml	0	0
03/08/2015 0:02	AMAR379.9.20150803T000223Z.wav_chan0.xml	0	0
03/08/2015 0:10	AMAR379.9.20150803T001023Z.wav_chan0.xml	0	0
03/08/2015 0:18	AMAR379.9.20150803T001823Z.wav_chan0.xml	0	0
03/08/2015 0:26	AMAR379.9.20150803T002623Z.wav_chan0.xml	0	0
03/08/2015 0:34	AMAR379.9.20150803T003423Z.wav_chan0.xml	0	0
03/08/2015 0:42	AMAR379.9.20150803T004223Z.wav_chan0.xml	0	0
03/08/2015 0:50	AMAR379.9.20150803T005023Z.wav_chan0.xml	0	0
03/08/2015 0:58	AMAR379.9.20150803T005823Z.wav_chan0.xml	0	0
03/08/2015 1:06	AMAR379.9.20150803T010623Z.wav_chan0.xml	0	0
03/08/2015 1:14	AMAR379.9.20150803T011423Z.wav_chan0.xml	0	0
03/08/2015 1:22	AMAR379.9.20150803T012223Z.wav_chan0.xml	0	0
03/08/2015 1:30	AMAR379.9.20150803T013023Z.wav_chan0.xml	0	0
03/08/2015 1:38	AMAR379.9.20150803T013823Z.wav_chan0.xml	0	0
03/08/2015 1:46	AMAR379.9.20150803T014623Z.wav_chan0.xml	0	0
03/08/2015 1:54	AMAR379.9.20150803T015423Z.wav_chan0.xml	0	0
03/08/2015 2:02	AMAR379.9.20150803T020223Z.wav_chan0.xml	0	0
03/08/2015 2:10	AMAR379.9.20150803T021023Z.wav_chan0.xml	0	0
03/08/2015 2:18	AMAR379.9.20150803T021823Z.wav_chan0.xml	0	0
03/08/2015 2:26	AMAR379.9.20150803T022623Z.wav_chan0.xml	0	0
03/08/2015 2:34	AMAR379.9.20150803T023423Z.wav_chan0.xml	0	0
03/08/2015 2:42	AMAR379.9.20150803T024223Z.wav_chan0.xml	0	0
03/08/2015 2:50	AMAR379.9.20150803T025023Z.wav_chan0.xml	0	0
03/08/2015 2:58	AMAR379.9.20150803T025823Z.wav_chan0.xml	0	0
03/08/2015 3:06	AMAR379.9.20150803T030623Z.wav_chan0.xml	0	0
03/08/2015 3:14	AMAR379.9.20150803T031423Z.wav_chan0.xml	0	0
03/08/2015 3:22	AMAR379.9.20150803T032223Z.wav_chan0.xml	0	0
03/08/2015 3:30	AMAR379.9.20150803T033023Z.wav_chan0.xml	0	0
03/08/2015 3:38	AMAR379.9.20150803T033823Z.wav_chan0.xml	0	0
03/08/2015 3:46	AMAR379.9.20150803T034623Z.wav_chan0.xml	0	0
03/08/2015 3:54	AMAR379.9.20150803T035423Z.wav_chan0.xml	0	0
03/08/2015 4:02	AMAR379.9.20150803T040223Z.wav_chan0.xml	0	0
03/08/2015 4:10	AMAR379.9.20150803T041023Z.wav_chan0.xml	0	0
03/08/2015 4:18	AMAR379.9.20150803T041823Z.wav_chan0.xml	0	0
03/08/2015 4:26	AMAR379.9.20150803T042623Z.wav_chan0.xml	0	0
03/08/2015 4:34	AMAR379.9.20150803T043423Z.wav_chan0.xml	0	0
03/08/2015 4:42	AMAR379.9.20150803T044223Z.wav_chan0.xml	0	0
03/08/2015 4:50	AMAR379.9.20150803T045023Z.wav_chan0.xml	0	0
03/08/2015 4:58	AMAR379.9.20150803T045823Z.wav_chan0.xml	0	0
03/08/2015 5:06	AMAR379.9.20150803T050623Z.wav_chan0.xml	0	0
03/08/2015 5:14	AMAR379.9.20150803T051423Z.wav_chan0.xml	0	0
03/08/2015 5:22	AMAR379.9.20150803T052223Z.wav_chan0.xml	0	0
03/08/2015 5:30	AMAR379.9.20150803T053023Z.wav_chan0.xml	0	0
03/08/2015 5:38	AMAR379.9.20150803T053823Z.wav_chan0.xml	0	0
03/08/2015 5:46	AMAR379.9.20150803T054623Z.wav_chan0.xml	0	0
03/08/2015 5:54	AMAR379.9.20150803T055423Z.wav_chan0.xml	0	0
03/08/2015 6:02	AMAR379.9.20150803T060223Z.wav_chan0.xml	0	0
03/08/2015 6:10	AMAR379.9.20150803T061023Z.wav_chan0.xml	0	0
03/08/2015 6:18	AMAR379.9.20150803T061823Z.wav_chan0.xml	0	0
03/08/2015 6:26	AMAR379.9.20150803T062623Z.wav_chan0.xml	0	0
03/08/2015 6:34	AMAR379.9.20150803T063423Z.wav_chan0.xml	0	0
03/08/2015 6:42	AMAR379.9.20150803T064223Z.wav_chan0.xml	0	0
03/08/2015 6:50	AMAR379.9.20150803T065023Z.wav_chan0.xml	0	0
03/08/2015 6:58	AMAR379.9.20150803T065823Z.wav_chan0.xml	0	0
03/08/2015 7:06	AMAR379.9.20150803T070623Z.wav_chan0.xml	0	0
03/08/2015 7:14	AMAR379.9.20150803T071423Z.wav_chan0.xml	0	0
03/08/2015 7:22	AMAR379.9.20150803T072223Z.wav_chan0.xml	0	0
03/08/2015 7:30	AMAR379.9.20150803T073023Z.wav_chan0.xml	0	0
03/08/2015 7:38	AMAR379.9.20150803T073823Z.wav_chan0.xml	0	0
03/08/2015 7:46	AMAR379.9.20150803T074623Z.wav_chan0.xml	0	0
03/08/2015 7:54	AMAR379.9.20150803T075423Z.wav_chan0.xml	0	0
03/08/2015 8:02	AMAR379.9.20150803T080223Z.wav_chan0.xml	0	0
03/08/2015 8:10	AMAR379.9.20150803T081023Z.wav_chan0.xml	0	0
03/08/2015 8:18	AMAR379.9.20150803T081823Z.wav_chan0.xml	0	0
03/08/2015 8:26	AMAR379.9.20150803T082623Z.wav_chan0.xml	0	0
03/08/2015 8:34	AMAR379.9.20150803T083423Z.wav_chan0.xml	0	0
03/08/2015 8:42	AMAR379.9.20150803T084223Z.wav_chan0.xml	0	0
03/08/2015 8:50	AMAR379.9.20150803T085023Z.wav_chan0.xml	0	0
03/08/2015 8:58	AMAR379.9.20150803T085823Z.wav_chan0.xml	0	0
03/08/2015 9:06	AMAR379.9.20150803T090623Z.wav_chan0.xml	0	0
03/08/2015 9:14	AMAR379.9.20150803T091423Z.wav_chan0.xml	0	0
03/08/2015 9:22	AMAR379.9.20150803T092223Z.wav_chan0.xml	0	0
03/08/2015 9:30	AMAR379.9.20150803T093023Z.wav_chan0.xml	0	0
03/08/2015 9:38	AMAR379.9.20150803T093823Z.wav_chan0.xml	0	0
03/08/2015 9:46	AMAR379.9.20150803T094623Z.wav_chan0.xml	0	0
03/08/2015 9:54	AMAR379.9.20150803T095423Z.wav_chan0.xml	0	0
03/08/2015 10:02	AMAR379.9.20150803T100223Z.wav_chan0.xml	0	0
03/08/2015 10:10	AMAR379.9.20150803T101023Z.wav_chan0.xml	0	0
03/08/2015 10:18	AMAR379.9.20150803T101823Z.wav_chan0.xml	0	0
03/08/2015 10:26	AMAR379.9.20150803T102623Z.wav_chan0.xml	0	0
03/08/2015 10:34	AMAR379.9.20150803T103423Z.wav_chan0.xml	0	0
03/08/2015 10:42	AMAR379.9.20150803T104223Z.wav_chan0.xml	0	0
03/08/2015 10:50	AMAR379.9.20150803T105023Z.wav_chan0.xml	0	0
03/08/2015 10:58	AMAR379.9.20150803T105823Z.wav_chan0.xml	0	0
03/08/2015 11:06	AMAR379.9.20150803T110623Z.wav_chan0.xml	0	0
03/08/2015 11:14	AMAR379.9.20150803T111423Z.wav_chan0.xml	0	0
03/08/2015 11:22	AMAR379.9.20150803T112223Z.wav_chan0.xml	0	0
03/08/2015 11:30	AMAR379.9.20150803T113023Z.wav_chan0.xml	0	0
03/08/2015 11:38	AMAR379.9.20150803T113823Z.wav_chan0.xml	0	0
03/08/2015 11:46	AMAR379.9.20150803T114623Z.wav_chan0.xml	0	0
03/08/2015 11:54	AMAR379.9.20150803T115423Z.wav_chan0.xml	0	0
03/08/2015 12:02	AMAR379.9.20150803T120223Z.wav_chan0.xml	0	0
03/08/2015 12:10	AMAR379.9.20150803T121023Z.wav_chan0.xml	0	0
03/08/2015 12:18	AMAR379.9.20150803T121823Z.wav_chan0.xml	0	0
03/08/2015 12:26	AMAR379.9.20150803T122623Z.wav_chan0.xml	0	0
03/08/2015 12:34	AMAR379.9.20150803T123423Z.wav_chan0.xml	0	0
03/08/2015 12:42	AMAR379.9.20150803T124223Z.wav_chan0.xml	0	0
03/08/2015 12:50	AMAR379.9.20150803T125023Z.wav_chan0.xml	0	0
03/08/2015 12:58	AMAR379.9.20150803T125823Z.wav_chan0.xml	0	0
03/08/2015 13:06	AMAR379.9.20150803T130623Z.wav_chan0.xml	0	0
03/08/2015 13:14	AMAR379.9.20150803T131423Z.wav_chan0.xml	0	0
03/08/2015 13:22	AMAR379.9.20150803T132223Z.wav_chan0.xml	0	0
03/08/2015 13:30	AMAR379.9.20150803T133023Z.wav_chan0.xml	0	0
03/08/2015 13:38	AMAR379.9.20150803T133823Z.wav_chan0.xml	0	0
03/08/2015 13:46	AMAR379.9.20150803T134623Z.wav_chan0.xml	0	0
03/08/2015 13:54	AMAR379.9.20150803T135423Z.wav_chan0.xml	0	0
03/08/2015 14:02	AMAR379.9.20150803T140223Z.wav_chan0.xml	0	0
03/08/2015 14:10	AMAR379.9.20150803T141023Z.wav_chan0.xml	0	0
03/08/2015 14:18	AMAR379.9.20150803T141823Z.wav_chan0.xml	0	0
03/08/2015 14:26	AMAR379.9.20150803T142623Z.wav_chan0.xml	0	0
03/08/2015 14:34	AMAR379.9.20150803T143423Z.wav_chan0.xml	0	0
03/08/2015 14:42	AMAR379.9.20150803T144223Z.wav_chan0.xml	0	0
03/08/2015 14:50	AMAR379.9.20150803T145023Z.wav_chan0.xml	0	0
03/08/2015 14:58	AMAR379.9.20150803T145823Z.wav_chan0.xml	0	0
03/08/2015 15:06	AMAR379.9.20150803T150623Z.wav_chan0.xml	0	0
03/08/2015 15:14	AMAR379.9.20150803T151423Z.wav_chan0.xml	0	0
03/08/2015 15:22	AMAR379.9.20150803T152223Z.wav_chan0.xml	0	0
03/08/2015 15:30	AMAR379.9.20150803T153023Z.wav_chan0.xml	0	0
03/08/2015 15:38	AMAR379.9.20150803T153823Z.wav_chan0.xml	0	0
03/08/2015 15:46	AMAR379.9.20150803T154623Z.wav_chan0.xml	0	0
03/08/2015 15:54	AMAR379.9.20150803T155423Z.wav_chan0.xml	0	0
03/08/2015 16:02	AMAR379.9.20150803T160223Z.wav_chan0.xml	0	0
03/08/2015 16:10	AMAR379.9.20150803T161023Z.wav_chan0.xml	0	0
03/08/2015 16:18	AMAR379.9.20150803T161823Z.wav_chan0.xml	0	0
03/08/2015 16:26	AMAR379.9.20150803T162623Z.wav_chan0.xml	0	0
03/08/2015 16:34	AMAR379.9.20150803T163423Z.wav_chan0.xml	0	0
03/08/2015 16:42	AMAR379.9.20150803T164223Z.wav_chan0.xml	0	0
03/08/2015 16:50	AMAR379.9.20150803T165023Z.wav_chan0.xml	0	0
03/08/2015 16:58	AMAR379.9.20150803T165823Z.wav_chan0.xml	0	0
03/08/2015 17:06	AMAR379.9.20150803T170623Z.wav_chan0.xml	0	0
03/08/2015 17:14	AMAR379.9.20150803T171423Z.wav_chan0.xml	0	0
03/08/2015 17:22	AMAR379.9.20150803T172223Z.wav_chan0.xml	0	0
03/08/2015 17:30	AMAR379.9.20150803T173023Z.wav_chan0.xml	0	0
03/08/2015 17:38	AMAR379.9.20150803T173823Z.wav_chan0.xml	0	0
03/08/2015 17:46	AMAR379.9.20150803T174623Z.wav_chan0.xml	0	0
03/08/2015 17:54	AMAR379.9.20150803T175423Z.wav_chan0.xml	0	0
03/08/2015 18:02	AMAR379.9.20150803T180223Z.wav_chan0.xml	0	0
03/08/2015 18:10	AMAR379.9.20150803T181023Z.wav_chan0.xml	0	0
03/08/2015 18:18	AMAR379.9.20150803T181823Z.wav_chan0.xml	0	0
03/08/2015 18:26	AMAR379.9.20150803T182623Z.wav_chan0.xml	0	0
03/08/2015 18:34	AMAR379.9.20150803T183423Z.wav_chan0.xml	0	0
03/08/2015 18:42	AMAR379.9.20150803T184223Z.wav_chan0.xml	0	0
03/08/2015 18:50	AMAR379.9.20150803T185023Z.wav_chan0.xml	0	0
03/08/2015 18:58	AMAR379.9.20150803T185823Z.wav_chan0.xml	0	0
03/08/2015 19:06	AMAR379.9.20150803T190623Z.wav_chan0.xml	0	0
03/08/2015 19:14	AMAR379.9.20150803T191423Z.wav_chan0.xml	0	0
03/08/2015 19:22	AMAR379.9.20150803T192223Z.wav_chan0.xml	0	0
03/08/2015 19:30	AMAR379.9.20150803T193023Z.wav_chan0.xml	0	0
03/08/2015 19:38	AMAR379.9.20150803T193823Z.wav_chan0.xml	0	0
03/08/2015 19:46	AMAR379.9.20150803T194623Z.wav_chan0.xml	0	0
03/08/2015 19:54	AMAR379.9.20150803T195423Z.wav_chan0.xml	0	0
03/08/2015 20:02	AMAR379.9.20150803T200223Z.wav_chan0.xml	0	0
03/08/2015 20:10	AMAR379.9.20150803T201023Z.wav_chan0.xml	0	0
03/08/2015 20:18	AMAR379.9.20150803T201823Z.wav_chan0.xml	0	0
03/08/2015 20:26	AMAR379.9.20150803T202623Z.wav_chan0.xml	0	0
03/08/2015 20:34	AMAR379.9.20150803T203423Z.wav_chan0.xml	0	0
03/08/2015 20:42	AMAR379.9.20150803T204223Z.wav_chan0.xml	0	0
03/08/2015 20:50	AMAR379.9.20150803T205023Z.wav_chan0.xml	0	0
03/08/2015 20:58	AMAR379.9.20150803T205823Z.wav_chan0.xml	0	0
03/08/2015 21:06	AMAR379.9.20150803T210623Z.wav_chan0.xml	0	0
03/08/2015 21:14	AMAR379.9.20150803T211423Z.wav_chan0.xml	0	0
03/08/2015 21:22	AMAR379.9.20150803T212223Z.wav_chan0.xml	0	0
03/08/2015 21:30	AMAR379.9.20150803T213023Z.wav_chan0.xml	0	0
03/08/2015 21:38	AMAR379.9.20150803T213823Z.wav_chan0.xml	0	0
03/08/2015 21:46	AMAR379.9.20150803T214623Z.wav_chan0.xml	0	0
03/08/2015 21:54	AMAR379.9.20150803T215423Z.wav_chan0.xml	0	0
03/08/2015 22:02	AMAR379.9.20150803T220223Z.wav_chan0.xml	0	0
03/08/2015 22:10	AMAR379.9.20150803T221023Z.wav_chan0.xml	0	0
03/08/2015 22:18	AMAR379.9.20150803T221823Z.wav_chan0.xml	0	0
03/08/2015 22:26	AMAR379.9.20150803T222623Z.wav_chan0.xml	0	0
03/08/2015 22:34	AMAR379.9.20150803T223423Z.wav_chan0.xml	0	0
03/08/2015 22:42	AMAR379.9.20150803T224223Z.wav_chan0.xml	0	0
03/08/2015 22:50	AMAR379.9.20150803T225023Z.wav_chan0.xml	0	0
03/08/2015 22:58	AMAR379.9.20150803T225823Z.wav_chan0.xml	0	0
03/08/2015 23:06	AMAR379.9.20150803T230623Z.wav_chan0.xml	0	0
03/08/2015 23:14	AMAR379.9.20150803T231423Z.wav_chan0.xml	0	0
03/08/2015 23:22	AMAR379.9.20150803T232223Z.wav_chan0.xml	0	0
03/08/2015 23:30	AMAR379.9.20150803T233023Z.wav_chan0.xml	0	0
03/08/2015 23:38	AMAR379.9.20150803T233823Z.wav_chan0.xml	0	0
03/08/2015 23:46	AMAR379.9.20150803T234623Z.wav_chan0.xml	0	0
03/08/2015 23:54	AMAR379.9.20150803T235423Z.wav_chan0.xml	0	0
03/07/2015 0:02	AMAR379.9.20150703T000223Z.wav_chan0.xml	0	0
03/07/2015 0:10	AMAR379.9.20150703T001023Z.wav_chan0.xml	0	0
03/07/2015 0:18	AMAR379.9.20150703T001823Z.wav_chan0.xml	0	0
03/07/2015 0:26	AMAR379.9.20150703T002623Z.wav_chan0.xml	0	0
03/07/2015 0:34	AMAR379.9.20150703T003423Z.wav_chan0.xml	0	0
03/07/2015 0:42	AMAR379.9.20150703T004223Z.wav_chan0.xml	0	0
03/07/2015 0:50	AMAR379.9.20150703T005023Z.wav_chan0.xml	0	0
03/07/2015 0:58	AMAR379.9.20150703T005823Z.wav_chan0.xml	0	0
03/07/2015 1:06	AMAR379.9.20150703T010623Z.wav_chan0.xml	0	0
03/07/2015 1:14	AMAR379.9.20150703T011423Z.wav_chan0.xml	0	0
03/07/2015 1:22	AMAR379.9.20150703T012223Z.wav_chan0.xml	0	0
03/07/2015 1:30	AMAR379.9.20150703T013023Z.wav_chan0.xml	0	0
03/07/2015 1:38	AMAR379.9.20150703T013823Z.wav_chan0.xml	0	0
03/07/2015 1:46	AMAR379.9.20150703T014623Z.wav_chan0.xml	0	0
03/07/2015 1:54	AMAR379.9.20150703T015423Z.wav_chan0.xml	0	0
03/07/2015 2:02	AMAR379.9.20150703T020223Z.wav_chan0.xml	0	0
03/07/2015 2:10	AMAR379.9.20150703T021023Z.wav_chan0.xml	0	0
03/07/2015 2:18	AMAR379.9.20150703T021823Z.wav_chan0.xml	0	0
03/07/2015 2:26	AMAR379.9.20150703T022623Z.wav_chan0.xml	0	0
03/07/2015 2:34	AMAR379.9.20150703T023423Z.wav_chan0.xml	0	0
03/07/2015 2:42	AMAR379.9.20150703T024223Z.wav_chan0.xml	0	0
03/07/2015 2:50	AMAR379.9.20150703T025023Z.wav_chan0.xml	0	0
03/07/2015 2:58	AMAR379.9.20150703T025823Z.wav_chan0.xml	0	0
03/07/2015 3:06	AMAR379.9.20150703T030623Z.wav_chan0.xml	0	0
03/07/2015 3:14	AMAR379.9.20150703T031423Z.wav_chan0.xml	0	0
03/07/2015 3:22	AMAR379.9.20150703T032223Z.wav_chan0.xml	0	0
03/07/2015 3:30	AMAR379.9.20150703T033023Z.wav_chan0.xml	0	0
03/07/2015 3:38	AMAR379.9.20150703T033823Z.wav_chan0.xml	0	0
03/07/2015 3:46	AMAR379.9.20150703T034623Z.wav_chan0.xml	0	0
03/07/2015 3:54	AMAR379.9.20150703T035423Z.wav_chan0.xml	0	0
03/07/2015 4:02	AMAR379.9.20150703T040223Z.wav_chan0.xml	0	0
03/07/2015 4:10	AMAR379.9.20150703T041023Z.wav_chan0.xml	0	0
03/07/2015 4:18	AMAR379.9.20150703T041823Z.wav_chan0.xml	0	0
03/07/2015 4:26	AMAR379.9.20150703T042623Z.wav_chan0.xml	0	0
03/07/2015 4:34	AMAR379.9.20150703T043423Z.wav_chan0.xml	0	0
03/07/2015 4:42	AMAR379.9.20150703T044223Z.wav_chan0.xml	0	0
03/07/2015 4:50	AMAR379.9.20150703T045023Z.wav_chan0.xml	0	0
03/07/2015 4:58	AMAR379.9.20150703T045823Z.wav_chan0.xml	0	0
03/07/2015 5:06	AMAR379.9.20150703T050623Z.wav_chan0.xml	0	0
03/07/2015 5:14	AMAR379.9.20150703T051423Z.wav_chan0.xml	0	0
03/07/2015 5:22	AMAR379.9.20150703T052223Z.wav_chan0.xml	0	0
03/07/2015 5:30	AMAR379.9.20150703T053023Z.wav_chan0.xml	0	0
03/07/2015 5:38	AMAR379.9.20150703T053823Z.wav_chan0.xml	0	0
03/07/2015 5:46	AMAR379.9.20150703T054623Z.wav_chan0.xml	0	0
03/07/2015 5:54	AMAR379.9.20150703T055423Z.wav_chan0.xml	0	0
03/07/2015 6:02	AMAR379.9.20150703T060223Z.wav_chan0.xml	0	0
03/07/2015 6:10	AMAR379.9.20150703T061023Z.wav_chan0.xml	0	0
03/07/2015 6:18	AMAR379.9.20150703T061823Z.wav_chan0.xml	0	0
03/07/2015 6:26	AMAR379.9.20150703T062623Z.wav_chan0.xml	0	0
03/07/2015 6:34	AMAR379.9.20150703T063423Z.wav_chan0.xml	0	0
03/07/2015 6:42	AMAR379.9.20150703T064223Z.wav_chan0.xml	0	0
03/07/2015 6:50	AMAR379.9.20150703T065023Z.wav_chan0.xml	0	0
03/07/2015 6:58	AMAR379.9.20150703T065823Z.wav_chan0.xml	0	0
03/07/2015 7:06	AMAR379.9.20150703T070623Z.wav_chan0.xml	0	0
03/07/2015 7:14	AMAR379.9.20150703T071423Z.wav_chan0.xml	0	0
03/07/2015 7:22	AMAR379.9.20150703T072223Z.wav_chan0.xml	0	0
03/07/2015 7:30	AMAR379.9.20150703T073023Z.wav_chan0.xml	0	0
03/07/2015 7:38	AMAR379.9.20150703T073823Z.wav_chan0.xml	0	0
03/07/2015 7:46	AMAR379.9.20150703T074623Z.wav_chan0.xml	0	0
03/07/2015 7:54	AMAR379.9.20150703T075423Z.wav_chan0.xml	0	0
03/07/2015 8:02	AMAR379.9.20150703T080223Z.wav_chan0.xml	0	0
03/07/2015 8:10	AMAR379.9.20150703T081023Z.wav_chan0.xml	0	0
03/07/2015 8:18	AMAR379.9.20150703T081823Z.wav_chan0.xml	0	0
03/07/2015 8:26	AMAR379.9.20150703T082623Z.wav_chan0.xml	0	0
03/07/2015 8:34	AMAR379.9.20150703T083423Z.wav_chan0.xml	0	0
03/07/2015 8:42	AMAR379.9.20150703T084223Z.wav_chan0.xml	0	0
03/07/2015 8:50	AMAR379.9.20150703T085023Z.wav_chan0.xml	0	0
03/07/2015 8:58	AMAR379.9.20150703T085823Z.wav_chan0.xml	0	0
03/07/2015 9:06	AMAR379.9.20150703T090623Z.wav_chan0.xml	0	0
03/07/2015 9:14	AMAR379.9.20150703T091423Z.wav_chan0.xml	0	0
03/07/2015 9:22	AMAR379.9.20150703T092223Z.wav_chan0.xml	0	0
03/07/2015 9:30	AMAR379.9.20150703T093023Z.wav_chan0.xml	0	0
03/07/2015 9:38	AMAR379.9.20150703T093823Z.wav_chan0.xml	0	0
03/07/2015 9:46	AMAR379.9.20150703T094623Z.wav_chan0.xml	0	0
03/07/2015 9:54	AMAR379.9.20150703T095423Z.wav_chan0.xml	0	0
03/07/2015 10:02	AMAR379.9.20150703T100223Z.wav_chan0.xml	0	0
03/07/2015 10:10	AMAR379.9.20150703T101023Z.wav_chan0.xml	0	0
03/07/2015 10:18	AMAR379.9.20150703T101823Z.wav_chan0.xml	0	0
03/07/2015 10:26	AMAR379.9.20150703T102623Z.wav_chan0.xml	0	0
03/07/2015 10:34	AMAR379.9.20150703T103423Z.wav_chan0.xml	0	0
03/07/2015 10:42	AMAR379.9.20150703T104223Z.wav_chan0.xml	0	0
03/07/2015 10:50	AMAR379.9.20150703T105023Z.wav_chan0.xml	0	0
03/07/2015 10:58	AMAR379.9.20150703T105823Z.wav_chan0.xml	0	0
03/07/2015 11:06	AMAR379.9.20150703T110623Z.wav_chan0.xml	0	0
03/07/2015 11:14	AMAR379.9.20150703T111423Z.wav_chan0.xml	0	0
03/07/2015 11:22	AMAR379.9.20150703T112223Z.wav_chan0.xml	0	0
03/07/2015 11:30	AMAR379.9.20150703T113023Z.wav_chan0.xml	0	0
03/07/2015 11:38	AMAR379.9.20150703T113823Z.wav_chan0.xml	0	0
03/07/2015 11:46	AMAR379.9.20150703T114623Z.wav_chan0.xml	0	0
03/07/2015 11:54	AMAR379.9.20150703T115423Z.wav_chan0.xml	0	0
03/07/2015 12:02	AMAR379.9.20150703T120223Z.wav_chan0.xml	0	0
03/07/2015 12:10	AMAR379.9.20150703T121023Z.wav_chan0.xml	0	0
03/07/2015 12:18	AMAR379.9.20150703T121823Z.wav_chan0.xml	0	0
03/07/2015 12:26	AMAR379.9.20150703T122623Z.wav_chan0.xml	0	0
03/07/2015 12:34	AMAR379.9.20150703T123423Z.wav_chan0.xml	0	0
03/07/2015 12:42	AMAR379.9.20150703T124223Z.wav_chan0.xml	0	0
03/07/2015 12:50	AMAR379.9.20150703T125023Z.wav_chan0.xml	0	0
03/07/2015 12:58	AMAR379.9.20150703T125823Z.wav_chan0.xml	0	0
03/07/2015 13:06	AMAR379.9.20150703T130623Z.wav_chan0.xml	0	0
03/07/2015 13:14	AMAR379.9.20150703T131423Z.wav_chan0.xml	0	0
03/07/2015 13:22	AMAR379.9.20150703T132223Z.wav_chan0.xml	0	0
03/07/2015 13:30	AMAR379.9.20150703T133023Z.wav_chan0.xml	0	0
03/07/2015 13:38	AMAR379.9.20150703T133823Z.wav_chan0.xml	0	0
03/07/2015 13:46	AMAR379.9.20150703T134623Z.wav_chan0.xml	0	0
03/07/2015 13:54	AMAR379.9.20150703T135423Z.wav_chan0.xml	0	0
03/07/2015 14:02	AMAR379.9.20150703T140223Z.wav_chan0.xml	0	0
03/07/2015 14:10	AMAR379.9.20150703T141023Z.wav_chan0.xml	0	0
03/07/2015 14:18	AMAR379.9.20150703T141823Z.wav_chan0.xml	0	0
03/07/2015 14:26	AMAR379.9.20150703T142623Z.wav_chan0.xml	0	0
03/07/2015 14:34	AMAR379.9.20150703T143423Z.wav_chan0.xml	0	0
03/07/2015 14:42	AMAR379.9.20150703T144223Z.wav_chan0.xml	0	0
03/07/2015 14:50	AMAR379.9.20150703T145023Z.wav_chan0.xml	0	0
03/07/2015 14:58	AMAR379.9.20150703T145823Z.wav_chan0.xml	0	0
03/07/2015 15:06	AMAR379.9.20150703T150623Z.wav_chan0.xml	0	0
03/07/2015 15:14	AMAR379.9.20150703T151423Z.wav_chan0.xml	0	0
03/07/2015 15:22	AMAR379.9.20150703T152223Z.wav_chan0.xml	0	0
03/07/2015 15:30	AMAR379.9.20150703T153023Z.wav_chan0.xml	0	0
03/07/2015 15:38	AMAR379.9.20150703T153823Z.wav_chan0.xml	0	0
03/07/2015 15:46	AMAR379.9.20150703T154623Z.wav_chan0.xml	0	0
03/07/2015 15:54	AMAR379.9.20150703T155423Z.wav_chan0.xml	0	0
03/07/2015 16:02	AMAR379.9.20150703T160223Z.wav_chan0.xml	0	0
03/07/2015 16:10	AMAR379.9.20150703T161023Z.wav_chan0.xml	0	0
03/07/2015 16:18	AMAR379.9.20150703T161823Z.wav_chan0.xml	0	0
03/07/2015 16:26	AMAR379.9.20150703T162623Z.wav_chan0.xml	0	0
03/07/2015 16:34	AMAR379.9.20150703T163423Z.wav_chan0.xml	0	0
03/07/2015 16:42	AMAR379.9.20150703T164223Z.wav_chan0.xml	0	0
03/07/2015 16:50	AMAR379.9.20150703T165023Z.wav_chan0.xml	0	0
03/07/2015 16:58	AMAR379.9.20150703T165823Z.wav_chan0.xml	0	0
03/07/2015 17:06	AMAR379.9.20150703T170623Z.wav_chan0.xml	0	0
03/07/2015 17:14	AMAR379.9.20150703T171423Z.wav_chan0.xml	0	0
03/07/2015 17:22	AMAR379.9.20150703T172223Z.wav_chan0.xml	0	0
03/07/2015 17:30	AMAR379.9.20150703T173023Z.wav_chan0.xml	0	0
03/07/2015 17:38	AMAR379.9.20150703T173823Z.wav_chan0.xml	0	0
03/07/2015 17:46	AMAR379.9.20150703T174623Z.wav_chan0.xml	0	0
03/07/2015 17:54	AMAR379.9.20150703T175423Z.wav_chan0.xml	0	0
03/07/2015 18:02	AMAR379.9.20150703T180223Z.wav_chan0.xml	0	0
03/07/2015 18:10	AMAR379.9.20150703T181023Z.wav_chan0.xml	0	0
03/07/2015 18:18	AMAR379.9.20150703T181823Z.wav_chan0.xml	0	0
03/07/2015 18:26	AMAR379.9.20150703T182623Z.wav_chan0.xml	0	0
03/07/2015 18:34	AMAR379.9.20150703T183423Z.wav_chan0.xml	0	0
03/07/2015 18:42	AMAR379.9.20150703T184223Z.wav_chan0.xml	0	0
03/07/2015 18:50	AMAR379.9.20150703T185023Z.wav_chan0.xml	0	0
03/07/2015 18:58	AMAR379.9.20150703T185823Z.wav_chan0.xml	0	0
03/07/2015 19:06	AMAR379.9.20150703T190623Z.wav_chan0.xml	0	0
03/07/2015 19:14	AMAR379.9.20150703T191423Z.wav_chan0.xml	0	0
03/07/2015 19:22	AMAR379.9.20150703T192223Z.wav_chan0.xml	0	0
03/07/2015 19:30	AMAR379.9.20150703T193023Z.wav_chan0.xml	0	0
03/07/2015 19:38	AMAR379.9.20150703T193823Z.wav_chan0.xml	0	0
03/07/2015 19:46	AMAR379.9.20150703T194623Z.wav_chan0.xml	0	0
03/07/2015 19:54	AMAR379.9.20150703T195423Z.wav_chan0.xml	0	0
03/07/2015 20:02	AMAR379.9.20150703T200223Z.wav_chan0.xml	0	0
03/07/2015 20:10	AMAR379.9.20150703T201023Z.wav_chan0.xml	0	0
03/07/2015 20:18	AMAR379.9.20150703T201823Z.wav_chan0.xml	0	0
03/07/2015 20:26	AMAR379.9.20150703T202623Z.wav_chan0.xml	0	0
03/07/2015 20:34	AMAR379.9.20150703T203423Z.wav_chan0.xml	0	0
03/07/2015 20:42	AMAR379.9.20150703T204223Z.wav_chan0.xml	0	0
03/07/2015 20:50	AMAR379.9.20150703T205023Z.wav_chan0.xml	0	0
03/07/2015 20:58	AMAR379.9.20150703T205823Z.wav_chan0.xml	0	0
03/07/2015 21:06	AMAR379.9.20150703T210623Z.wav_chan0.xml	0	0
03/07/2015 21:14	AMAR379.9.20150703T211423Z.wav_chan0.xml	0	0
03/07/2015 21:22	AMAR379.9.20150703T212223Z.wav_chan0.xml	0	0
03/07/2015 21:30	AMAR379.9.20150703T213023Z.wav_chan0.xml	0	0
03/07/2015 21:38	AMAR379.9.20150703T213823Z.wav_chan0.xml	0	0
03/07/2015 21:46	AMAR379.9.20150703T214623Z.wav_chan0.xml	0	0
03/07/2015 21:54	AMAR379.9.20150703T215423Z.wav_chan0.xml	0	0
03/07/2015 22:02	AMAR379.9.20150703T220223Z.wav_chan0.xml	0	0
03/07/2015 22:10	AMAR379.9.20150703T221023Z.wav_chan0.xml	0	0
03/07/2015 22:18	AMAR379.9.20150703T221823Z.wav_chan0.xml	0	0
03/07/2015 22:26	AMAR379.9.20150703T222623Z.wav_chan0.xml	0	0
03/07/2015 22:34	AMAR379.9.20150703T223423Z.wav_chan0.xml	0	0
03/07/2015 22:42	AMAR379.9.20150703T224223Z.wav_chan0.xml	0	0
03/07/2015 22:50	AMAR379.9.20150703T225023Z.wav_chan0.xml	0	0
03/07/2015 22:58	AMAR379.9.20150703T225823Z.wav_chan0.xml	0	0
03/07/2015 23:06	AMAR379.9.20150703T230623Z.wav_chan0.xml	0	0
03/07/2015 23:14	AMAR379.9.20150703T231423Z.wav_chan0.xml	0	0
03/07/2015 23:22	AMAR379.9.20150703T232223Z.wav_chan0.xml	0	0
03/07/2015 23:30	AMAR379.9.20150703T233023Z.wav_chan0.xml	0	0
03/07/2015 23:38	AMAR379.9.20150703T233823Z.wav_chan0.xml	0	0
03/07/2015 23:46	AMAR379.9.20150703T234623Z.wav_chan0.xml	0	0
03/07/2015 23:54	AMAR379.9.20150703T235423Z.wav_chan0.xml	0	0
03/06/2015 0:02	AMAR379.9.20150603T000223Z.wav_chan0.xml	0	0
03/06/2015 0:10	AMAR379.9.20150603T001023Z.wav_chan0.xml	0	0
03/06/2015 0:18	AMAR379.9.20150603T001823Z.wav_chan0.xml	0	0
03/06/2015 0:26	AMAR379.9.20150603T002623Z.wav_chan0.xml	0	0
03/06/2015 0:34	AMAR379.9.20150603T003423Z.wav_chan0.xml	0	0
03/06/2015 0:42	AMAR379.9.20150603T004223Z.wav_chan0.xml	0	0
03/06/2015 0:50	AMAR379.9.20150603T005023Z.wav_chan0.xml	0	0
03/06/2015 0:58	AMAR379.9.20150603T005823Z.wav_chan0.xml	0	0
03/06/2015 1:06	AMAR379.9.20150603T010623Z.wav_chan0.xml	0	0
03/06/2015 1:14	AMAR379.9.20150603T011423Z.wav_chan0.xml	0	0
03/06/2015 1:22	AMAR379.9.20150603T012223Z.wav_chan0.xml	0	0
03/06/2015 1:30	AMAR379.9.20150603T013023Z.wav_chan0.xml	0	0
03/06/2015 1:38	AMAR379.9.20150603T013823Z.wav_chan0.xml	0	0
03/06/2015 1:46	AMAR379.9.20150603T014623Z.wav_chan0.xml	0	0
03/06/2015 1:54	AMAR379.9.20150603T015423Z.wav_chan0.xml	0	0
03/06/2015 2:02	AMAR379.9.20150603T020223Z.wav_chan0.xml	0	0
03/06/2015 2:10	AMAR379.9.20150603T021023Z.wav_chan0.xml	0	0
03/06/2015 2:18	AMAR379.9.20150603T021823Z.wav_chan0.xml	0	0
03/06/2015 2:26	AMAR379.9.20150603T022623Z.wav_chan0.xml	0	0
03/06/2015 2:34	AMAR379.9.20150603T023423Z.wav_chan0.xml	0	0
03/06/2015 2:42	AMAR379.9.20150603T024223Z.wav_chan0.xml	0	0
03/06/2015 2:50	AMAR379.9.20150603T025023Z.wav_chan0.xml	0	0
03/06/2015 2:58	AMAR379.9.20150603T025823Z.wav_chan0.xml	0	0
03/06/2015 3:06	AMAR379.9.20150603T030623Z.wav_chan0.xml	0	0
03/06/2015 3:14	AMAR379.9.20150603T031423Z.wav_chan0.xml	0	0
03/06/2015 3:22	AMAR379.9.20150603T032223Z.wav_chan0.xml	0	0
03/06/2015 3:30	AMAR379.9.20150603T033023Z.wav_chan0.xml	0	0
03/06/2015 3:38	AMAR379.9.20150603T033823Z.wav_chan0.xml	0	0
03/06/2015 3:46	AMAR379.9.20150603T034623Z.wav_chan0.xml	0	0
03/06/2015 3:54	AMAR379.9.20150603T035423Z.wav_chan0.xml	0	0
03/06/2015 4:02	AMAR379.9.20150603T040223Z.wav_chan0.xml	0	0
03/06/2015 4:10	AMAR379.9.20150603T041023Z.wav_chan0.xml	0	0
03/06/2015 4:18	AMAR379.9.20150603T041823Z.wav_chan0.xml	0	0
03/06/2015 4:26	AMAR379.9.20150603T042623Z.wav_chan0.xml	0	0
03/06/2015 4:34	AMAR379.9.20150603T043423Z.wav_chan0.xml	0	0
03/06/2015 4:42	AMAR379.9.20150603T044223Z.wav_chan0.xml	0	0
03/06/2015 4:50	AMAR379.9.20150603T045023Z.wav_chan0.xml	0	0
03/06/2015 4:58	AMAR379.9.20150603T045823Z.wav_chan0.xml	0	0
03/06/2015 5:06	AMAR379.9.20150603T050623Z.wav_chan0.xml	0	0
03/06/2015 5:14	AMAR379.9.20150603T051423Z.wav_chan0.xml	0	0
03/06/2015 5:22	AMAR379.9.20150603T052223Z.wav_chan0.xml	0	0
03/06/2015 5:30	AMAR379.9.20150603T053023Z.wav_chan0.xml	0	0
03/06/2015 5:38	AMAR379.9.20150603T053823Z.wav_chan0.xml	0	0
03/06/2015 5:46	AMAR379.9.20150603T054623Z.wav_chan0.xml	0	0
03/06/2015 5:54	AMAR379.9.20150603T055423Z.wav_chan0.xml	0	0
03/06/2015 6:02	AMAR379.9.20150603T060223Z.wav_chan0.xml	0	0
03/06/2015 6:10	AMAR379.9.20150603T061023Z.wav_chan0.xml	0	0
03/06/2015 6:18	AMAR379.9.20150603T061823Z.wav_chan0.xml	0	0
03/06/2015 6:26	AMAR379.9.20150603T062623Z.wav_chan0.xml	0	0
03/06/2015 6:34	AMAR379.9.20150603T063423Z.wav_chan0.xml	0	0
03/06/2015 6:42	AMAR379.9.20150603T064223Z.wav_chan0.xml	0	0
03/06/2015 6:50	AMAR379.9.20150603T065023Z.wav_chan0.xml	0	0
03/06/2015 6:58	AMAR379.9.20150603T065823Z.wav_chan0.xml	0	0
03/06/2015 7:06	AMAR379.9.20150603T070623Z.wav_chan0.xml	0	0
03/06/2015 7:14	AMAR379.9.20150603T071423Z.wav_chan0.xml	0	0
03/06/2015 7:22	AMAR379.9.20150603T072223Z.wav_chan0.xml	0	0
03/06/2015 7:30	AMAR379.9.20150603T073023Z.wav_chan0.xml	0	0
03/06/2015 7:38	AMAR379.9.20150603T073823Z.wav_chan0.xml	0	0
03/06/2015 7:46	AMAR379.9.20150603T074623Z.wav_chan0.xml	0	0
03/06/2015 7:54	AMAR379.9.20150603T075423Z.wav_chan0.xml	0	0
03/06/2015 8:02	AMAR379.9.20150603T080223Z.wav_chan0.xml	0	0
03/06/2015 8:10	AMAR379.9.20150603T081023Z.wav_chan0.xml	0	0
03/06/2015 8:18	AMAR379.9.20150603T081823Z.wav_chan0.xml	0	0
03/06/2015 8:26	AMAR379.9.20150603T082623Z.wav_chan0.xml	0	0
03/06/2015 8:34	AMAR379.9.20150603T083423Z.wav_chan0.xml	0	0
03/06/2015 8:42	AMAR379.9.20150603T084223Z.wav_chan0.xml	0	0
03/06/2015 8:50	AMAR379.9.20150603T085023Z.wav_chan0.xml	0	0
03/06/2015 8:58	AMAR379.9.20150603T085823Z.wav_chan0.xml	0	0
03/06/2015 9:06	AMAR379.9.20150603T090623Z.wav_chan0.xml	0	0
03/06/2015 9:14	AMAR379.9.20150603T091423Z.wav_chan0.xml	0	0
03/06/2015 9:22	AMAR379.9.20150603T092223Z.wav_chan0.xml	0	0
03/06/2015 9:30	AMAR379.9.20150603T093023Z.wav_chan0.xml	0	0
03/06/2015 9:38	AMAR379.9.20150603T093823Z.wav_chan0.xml	0	0
03/06/2015 9:46	AMAR379.9.20150603T094623Z.wav_chan0.xml	0	0
03/06/2015 9:54	AMAR379.9.20150603T095423Z.wav_chan0.xml	0	0
03/06/2015 10:02	AMAR379.9.20150603T100223Z.wav_chan0.xml	0	0
03/06/2015 10:10	AMAR379.9.20150603T101023Z.wav_chan0.xml	0	0
03/06/2015 10:18	AMAR379.9.20150603T101823Z.wav_chan0.xml	0	0
03/06/2015 10:26	AMAR379.9.20150603T102623Z.wav_chan0.xml	0	0
03/06/2015 10:34	AMAR379.9.20150603T103423Z.wav_chan0.xml	0	0
03/06/2015 10:42	AMAR379.9.20150603T104223Z.wav_chan0.xml	0	0
03/06/2015 10:50	AMAR379.9.20150603T105023Z.wav_chan0.xml	0	0
03/06/2015 10:58	AMAR379.9.20150603T105823Z.wav_chan0.xml	0	0
03/06/2015 11:06	AMAR379.9.20150603T110623Z.wav_chan0.xml	0	0
03/06/2015 11:14	AMAR379.9.20150603T111423Z.wav_chan0.xml	0	0
03/06/2015 11:22	AMAR379.9.20150603T112223Z.wav_chan0.xml	0	0
03/06/2015 11:30	AMAR379.9.20150603T113023Z.wav_chan0.xml	0	0
03/06/2015 11:38	AMAR379.9.20150603T113823Z.wav_chan0.xml	0	0
03/06/2015 11:46	AMAR379.9.20150603T114623Z.wav_chan0.xml	0	0
03/06/2015 11:54	AMAR379.9.20150603T115423Z.wav_chan0.xml	0	0
03/06/2015 12:02	AMAR379.9.20150603T120223Z.wav_chan0.xml	0	0
03/06/2015 12:10	AMAR379.9.20150603T121023Z.wav_chan0.xml	0	0
03/06/2015 12:18	AMAR379.9.20150603T121823Z.wav_chan0.xml	0	0
03/06/2015 12:26	AMAR379.9.20150603T122623Z.wav_chan0.xml	0	0
03/06/2015 12:34	AMAR379.9.20150603T123423Z.wav_chan0.xml	0	0
03/06/2015 12:42	AMAR379.9.20150603T124223Z.wav_chan0.xml	0	0
03/06/2015 12:50	AMAR379.9.20150603T125023Z.wav_chan0.xml	0	0
03/06/2015 12:58	AMAR379.9.20150603T125823Z.wav_chan0.xml	0	0
03/06/2015 13:06	AMAR379.9.20150603T130623Z.wav_chan0.xml	0	0
03/06/2015 13:14	AMAR379.9.20150603T131423Z.wav_chan0.xml	0	0
03/06/2015 13:22	AMAR379.9.20150603T132223Z.wav_chan0.xml	0	0
03/06/2015 13:30	AMAR379.9.20150603T133023Z.wav_chan0.xml	0	0
03/06/2015 13:38	AMAR379.9.20150603T133823Z.wav_chan0.xml	0	0
03/06/2015 13:46	AMAR379.9.20150603T134623Z.wav_chan0.xml	0	0
03/06/2015 13:54	AMAR379.9.20150603T135423Z.wav_chan0.xml	0	0
03/06/2015 14:02	AMAR379.9.20150603T140223Z.wav_chan0.xml	0	0
03/06/2015 14:10	AMAR379.9.20150603T141023Z.wav_chan0.xml	0	0
03/06/2015 14:18	AMAR379.9.20150603T141823Z.wav_chan0.xml	0	0
03/06/2015 14:26	AMAR379.9.20150603T142623Z.wav_chan0.xml	0	0
03/06/2015 14:34	AMAR379.9.20150603T143423Z.wav_chan0.xml	0	0
03/06/2015 14:42	AMAR379.9.20150603T144223Z.wav_chan0.xml	0	0
03/06/2015 14:50	AMAR379.9.20150603T145023Z.wav_chan0.xml	0	0
03/06/2015 14:58	AMAR379.9.20150603T145823Z.wav_chan0.xml	0	0
03/06/2015 15:06	AMAR379.9.20150603T150623Z.wav_chan0.xml	0	0
03/06/2015 15:14	AMAR379.9.20150603T151423Z.wav_chan0.xml	0	0
03/06/2015 15:22	AMAR379.9.20150603T152223Z.wav_chan0.xml	0	0
03/06/2015 15:30	AMAR379.9.20150603T153023Z.wav_chan0.xml	0	0
03/06/2015 15:38	AMAR379.9.20150603T153823Z.wav_chan0.xml	0	0
03/06/2015 15:46	AMAR379.9.20150603T154623Z.wav_chan0.xml	0	0
03/06/2015 15:54	AMAR379.9.20150603T155423Z.wav_chan0.xml	0	0
03/06/2015 16:02	AMAR379.9.20150603T160223Z.wav_chan0.xml	0	0
03/06/2015 16:10	AMAR379.9.20150603T161023Z.wav_chan0.xml	0	0
03/06/2015 16:18	AMAR379.9.20150603T161823Z.wav_chan0.xml	0	0
03/06/2015 16:26	AMAR379.9.20150603T162623Z.wav_chan0.xml	0	0
03/06/2015 16:34	AMAR379.9.20150603T163423Z.wav_chan0.xml	0	0
03/06/2015 16:42	AMAR379.9.20150603T164223Z.wav_chan0.xml	0	0
03/06/2015 16:50	AMAR379.9.20150603T165023Z.wav_chan0.xml	0	0
03/06/2015 16:58	AMAR379.9.20150603T165823Z.wav_chan0.xml	0	0
03/06/2015 17:06	AMAR379.9.20150603T170623Z.wav_chan0.xml	0	0
03/06/2015 17:14	AMAR379.9.20150603T171423Z.wav_chan0.xml	0	0
03/06/2015 17:22	AMAR379.9.20150603T172223Z.wav_chan0.xml	0	0
03/06/2015 17:30	AMAR379.9.20150603T173023Z.wav_chan0.xml	0	0
03/06/2015 17:38	AMAR379.9.20150603T173823Z.wav_chan0.xml	0	0
03/06/2015 17:46	AMAR379.9.20150603T174623Z.wav_chan0.xml	0	0
03/06/2015 17:54	AMAR379.9.20150603T175423Z.wav_chan0.xml	0	0
03/06/2015 18:02	AMAR379.9.20150603T180223Z.wav_chan0.xml	0	0
03/06/2015 18:10	AMAR379.9.20150603T181023Z.wav_chan0.xml	0	0
03/06/2015 18:18	AMAR379.9.20150603T181823Z.wav_chan0.xml	0	0
03/06/2015 18:26	AMAR379.9.20150603T182623Z.wav_chan0.xml	0	0
03/06/2015 18:34	AMAR379.9.20150603T183423Z.wav_chan0.xml	0	0
03/06/2015 18:42	AMAR379.9.20150603T184223Z.wav_chan0.xml	0	0
03/06/2015 18:50	AMAR379.9.20150603T185023Z.wav_chan0.xml	0	0
03/06/2015 18:58	AMAR379.9.20150603T185823Z.wav_chan0.xml	0	0
03/06/2015 19:06	AMAR379.9.20150603T190623Z.wav_chan0.xml	0	0
03/06/2015 19:14	AMAR379.9.20150603T191423Z.wav_chan0.xml	0	0
03/06/2015 19:22	AMAR379.9.20150603T192223Z.wav_chan0.xml	0	0
03/06/2015 19:30	AMAR379.9.20150603T193023Z.wav_chan0.xml	0	0
03/06/2015 19:38	AMAR379.9.20150603T193823Z.wav_chan0.xml	0	0
03/06/2015 19:46	AMAR379.9.20150603T194623Z.wav_chan0.xml	0	0
03/06/2015 19:54	AMAR379.9.20150603T195423Z.wav_chan0.xml	0	0
03/06/2015 20:02	AMAR379.9.20150603T200223Z.wav_chan0.xml	0	0
03/06/2015 20:10	AMAR379.9.20150603T201023Z.wav_chan0.xml	0	0
03/06/2015 20:18	AMAR379.9.20150603T201823Z.wav_chan0.xml	0	0
03/06/2015 20:26	AMAR379.9.20150603T202623Z.wav_chan0.xml	0	0
03/06/2015 20:34	AMAR379.9.20150603T203423Z.wav_chan0.xml	0	0
03/06/2015 20:42	AMAR379.9.20150603T204223Z.wav_chan0.xml	0	0
03/06/2015 20:50	AMAR379.9.20150603T205023Z.wav_chan0.xml	0	0
03/06/2015 20:58	AMAR379.9.20150603T205823Z.wav_chan0.xml	0	0
03/06/2015 21:06	AMAR379.9.20150603T210623Z.wav_chan0.xml	0	0
03/06/2015 21:14	AMAR379.9.20150603T211423Z.wav_chan0.xml	0	0
03/06/2015 21:22	AMAR379.9.20150603T212223Z.wav_chan0.xml	0	0
03/06/2015 21:30	AMAR379.9.20150603T213023Z.wav_chan0.xml	0	0
03/06/2015 21:38	AMAR379.9.20150603T213823Z.wav_chan0.xml	0	0
03/06/2015 21:46	AMAR379.9.20150603T214623Z.wav_chan0.xml	0	0
03/06/2015 21:54	AMAR379.9.20150603T215423Z.wav_chan0.xml	0	0
03/06/2015 22:02	AMAR379.9.20150603T220223Z.wav_chan0.xml	0	0
03/06/2015 22:10	AMAR379.9.20150603T221023Z.wav_chan0.xml	0	0
03/06/2015 22:18	AMAR379.9.20150603T221823Z.wav_chan0.xml	0	0
03/06/2015 22:26	AMAR379.9.20150603T222623Z.wav_chan0.xml	0	0
03/06/2015 22:34	AMAR379.9.20150603T223423Z.wav_chan0.xml	0	0
03/06/2015 22:42	AMAR379.9.20150603T224223Z.wav_chan0.xml	0	0
03/06/2015 22:50	AMAR379.9.20150603T225023Z.wav_chan0.xml	0	0
03/06/2015 22:58	AMAR379.9.20150603T225823Z.wav_chan0.xml	0	0
03/06/2015 23:06	AMAR379.9.20150603T230623Z.wav_chan0.xml	0	0
03/06/2015 23:14	AMAR379.9.20150603T231423Z.wav_chan0.xml	0	0
03/06/2015 23:22	AMAR379.9.20150603T232223Z.wav_chan0.xml	0	0
03/06/2015 23:30	AMAR379.9.20150603T233023Z.wav_chan0.xml	0	0
03/06/2015 23:38	AMAR379.9.20150603T233823Z.wav_chan0.xml	0	0
03/06/2015 23:46	AMAR379.9.20150603T234623Z.wav_chan0.xml	0	0
03/06/2015 23:54	AMAR379.9.20150603T235423Z.wav_chan0.xml	0	0
04/08/2015 0:02	AMAR379.9.20150804T000223Z.wav_chan0.xml	0	0
04/08/2015 0:10	AMAR379.9.20150804T001023Z.wav_chan0.xml	0	0
04/08/2015 0:18	AMAR379.9.20150804T001823Z.wav_chan0.xml	0	0
04/08/2015 0:26	AMAR379.9.20150804T002623Z.wav_chan0.xml	0	0
04/08/2015 0:34	AMAR379.9.20150804T003423Z.wav_chan0.xml	0	0
04/08/2015 0:42	AMAR379.9.20150804T004223Z.wav_chan0.xml	0	0
04/08/2015 0:50	AMAR379.9.20150804T005023Z.wav_chan0.xml	0	0
04/08/2015 0:58	AMAR379.9.20150804T005823Z.wav_chan0.xml	0	0
04/08/2015 1:06	AMAR379.9.20150804T010623Z.wav_chan0.xml	0	0
04/08/2015 1:14	AMAR379.9.20150804T011423Z.wav_chan0.xml	0	0
04/08/2015 1:22	AMAR379.9.20150804T012223Z.wav_chan0.xml	0	0
04/08/2015 1:30	AMAR379.9.20150804T013023Z.wav_chan0.xml	0	0
04/08/2015 1:38	AMAR379.9.20150804T013823Z.wav_chan0.xml	0	0
04/08/2015 1:46	AMAR379.9.20150804T014623Z.wav_chan0.xml	0	0
04/08/2015 1:54	AMAR379.9.20150804T015423Z.wav_chan0.xml	0	0
04/08/2015 2:02	AMAR379.9.20150804T020223Z.wav_chan0.xml	0	0
04/08/2015 2:10	AMAR379.9.20150804T021023Z.wav_chan0.xml	0	0
04/08/2015 2:18	AMAR379.9.20150804T021823Z.wav_chan0.xml	0	0
04/08/2015 2:26	AMAR379.9.20150804T022623Z.wav_chan0.xml	0	0
04/08/2015 2:34	AMAR379.9.20150804T023423Z.wav_chan0.xml	0	0
04/08/2015 2:42	AMAR379.9.20150804T024223Z.wav_chan0.xml	0	0
04/08/2015 2:50	AMAR379.9.20150804T025023Z.wav_chan0.xml	0	0
04/08/2015 2:58	AMAR379.9.20150804T025823Z.wav_chan0.xml	0	0
04/08/2015 3:06	AMAR379.9.20150804T030623Z.wav_chan0.xml	0	0
04/08/2015 3:14	AMAR379.9.20150804T031423Z.wav_chan0.xml	0	0
04/08/2015 3:22	AMAR379.9.20150804T032223Z.wav_chan0.xml	0	0
04/08/2015 3:30	AMAR379.9.20150804T033023Z.wav_chan0.xml	0	0
04/08/2015 3:38	AMAR379.9.20150804T033823Z.wav_chan0.xml	0	0
04/08/2015 3:46	AMAR379.9.20150804T034623Z.wav_chan0.xml	0	0
04/08/2015 3:54	AMAR379.9.20150804T035423Z.wav_chan0.xml	0	0
04/08/2015 4:02	AMAR379.9.20150804T040223Z.wav_chan0.xml	0	0
04/08/2015 4:10	AMAR379.9.20150804T041023Z.wav_chan0.xml	0	0
04/08/2015 4:18	AMAR379.9.20150804T041823Z.wav_chan0.xml	0	0
04/08/2015 4:26	AMAR379.9.20150804T042623Z.wav_chan0.xml	0	0
04/08/2015 4:34	AMAR379.9.20150804T043423Z.wav_chan0.xml	0	0
04/08/2015 4:42	AMAR379.9.20150804T044223Z.wav_chan0.xml	0	0
04/08/2015 4:50	AMAR379.9.20150804T045023Z.wav_chan0.xml	0	0
04/08/2015 4:58	AMAR379.9.20150804T045823Z.wav_chan0.xml	0	0
04/08/2015 5:06	AMAR379.9.20150804T050623Z.wav_chan0.xml	0	0
04/08/2015 5:14	AMAR379.9.20150804T051423Z.wav_chan0.xml	0	0
04/08/2015 5:22	AMAR379.9.20150804T052223Z.wav_chan0.xml	0	0
04/08/2015 5:30	AMAR379.9.20150804T053023Z.wav_chan0.xml	0	0
04/08/2015 5:38	AMAR379.9.20150804T053823Z.wav_chan0.xml	0	0
04/08/2015 5:46	AMAR379.9.20150804T054623Z.wav_chan0.xml	0	0
04/08/2015 5:54	AMAR379.9.20150804T055423Z.wav_chan0.xml	0	0
04/08/2015 6:02	AMAR379.9.20150804T060223Z.wav_chan0.xml	0	0
04/08/2015 6:10	AMAR379.9.20150804T061023Z.wav_chan0.xml	0	0
04/08/2015 6:18	AMAR379.9.20150804T061823Z.wav_chan0.xml	0	0
04/08/2015 6:26	AMAR379.9.20150804T062623Z.wav_chan0.xml	0	0
04/08/2015 6:34	AMAR379.9.20150804T063423Z.wav_chan0.xml	0	0
04/08/2015 6:42	AMAR379.9.20150804T064223Z.wav_chan0.xml	0	0
04/08/2015 6:50	AMAR379.9.20150804T065023Z.wav_chan0.xml	0	0
04/08/2015 6:58	AMAR379.9.20150804T065823Z.wav_chan0.xml	0	0
04/08/2015 7:06	AMAR379.9.20150804T070623Z.wav_chan0.xml	0	0
04/08/2015 7:14	AMAR379.9.20150804T071423Z.wav_chan0.xml	0	0
04/08/2015 7:22	AMAR379.9.20150804T072223Z.wav_chan0.xml	0	0
04/08/2015 7:30	AMAR379.9.20150804T073023Z.wav_chan0.xml	0	0
04/08/2015 7:38	AMAR379.9.20150804T073823Z.wav_chan0.xml	0	0
04/08/2015 7:46	AMAR379.9.20150804T074623Z.wav_chan0.xml	0	0
04/08/2015 7:54	AMAR379.9.20150804T075423Z.wav_chan0.xml	0	0
04/08/2015 8:02	AMAR379.9.20150804T080223Z.wav_chan0.xml	0	0
04/08/2015 8:10	AMAR379.9.20150804T081023Z.wav_chan0.xml	0	0
04/08/2015 8:18	AMAR379.9.20150804T081823Z.wav_chan0.xml	0	0
04/08/2015 8:26	AMAR379.9.20150804T082623Z.wav_chan0.xml	0	0
04/08/2015 8:34	AMAR379.9.20150804T083423Z.wav_chan0.xml	0	0
04/08/2015 8:42	AMAR379.9.20150804T084223Z.wav_chan0.xml	0	0
04/08/2015 8:50	AMAR379.9.20150804T085023Z.wav_chan0.xml	0	0
04/08/2015 8:58	AMAR379.9.20150804T085823Z.wav_chan0.xml	0	0
04/08/2015 9:06	AMAR379.9.20150804T090623Z.wav_chan0.xml	0	0
04/08/2015 9:14	AMAR379.9.20150804T091423Z.wav_chan0.xml	0	0
04/08/2015 9:22	AMAR379.9.20150804T092223Z.wav_chan0.xml	0	0
04/08/2015 9:30	AMAR379.9.20150804T093023Z.wav_chan0.xml	0	0
04/08/2015 9:38	AMAR379.9.20150804T093823Z.wav_chan0.xml	0	0
04/08/2015 9:46	AMAR379.9.20150804T094623Z.wav_chan0.xml	0	0
04/08/2015 9:54	AMAR379.9.20150804T095423Z.wav_chan0.xml	0	0
04/08/2015 10:02	AMAR379.9.20150804T100223Z.wav_chan0.xml	0	0
04/08/2015 10:10	AMAR379.9.20150804T101023Z.wav_chan0.xml	0	0
04/08/2015 10:18	AMAR379.9.20150804T101823Z.wav_chan0.xml	0	0
04/08/2015 10:26	AMAR379.9.20150804T102623Z.wav_chan0.xml	0	0
04/08/2015 10:34	AMAR379.9.20150804T103423Z.wav_chan0.xml	0	0
04/08/2015 10:42	AMAR379.9.20150804T104223Z.wav_chan0.xml	0	0
04/08/2015 10:50	AMAR379.9.20150804T105023Z.wav_chan0.xml	0	0
04/08/2015 10:58	AMAR379.9.20150804T105823Z.wav_chan0.xml	0	0
04/08/2015 11:06	AMAR379.9.20150804T110623Z.wav_chan0.xml	0	0
04/08/2015 11:14	AMAR379.9.20150804T111423Z.wav_chan0.xml	0	0
04/08/2015 11:22	AMAR379.9.20150804T112223Z.wav_chan0.xml	0	0
04/08/2015 11:30	AMAR379.9.20150804T113023Z.wav_chan0.xml	0	0
04/08/2015 11:38	AMAR379.9.20150804T113823Z.wav_chan0.xml	0	0
04/08/2015 11:46	AMAR379.9.20150804T114623Z.wav_chan0.xml	0	0
04/08/2015 11:54	AMAR379.9.20150804T115423Z.wav_chan0.xml	0	0
04/08/2015 12:02	AMAR379.9.20150804T120223Z.wav_chan0.xml	0	0
04/08/2015 12:10	AMAR379.9.20150804T121023Z.wav_chan0.xml	0	0
04/08/2015 12:18	AMAR379.9.20150804T121823Z.wav_chan0.xml	0	0
04/08/2015 12:26	AMAR379.9.20150804T122623Z.wav_chan0.xml	0	0
04/08/2015 12:34	AMAR379.9.20150804T123423Z.wav_chan0.xml	0	0
04/08/2015 12:42	AMAR379.9.20150804T124223Z.wav_chan0.xml	0	0
04/08/2015 12:50	AMAR379.9.20150804T125023Z.wav_chan0.xml	0	0
04/08/2015 12:58	AMAR379.9.20150804T125823Z.wav_chan0.xml	0	0
04/08/2015 13:06	AMAR379.9.20150804T130623Z.wav_chan0.xml	0	0
04/08/2015 13:14	AMAR379.9.20150804T131423Z.wav_chan0.xml	0	0
04/08/2015 13:22	AMAR379.9.20150804T132223Z.wav_chan0.xml	0	0
04/08/2015 13:30	AMAR379.9.20150804T133023Z.wav_chan0.xml	0	0
04/08/2015 13:38	AMAR379.9.20150804T133823Z.wav_chan0.xml	0	0
04/08/2015 13:46	AMAR379.9.20150804T134623Z.wav_chan0.xml	0	0
04/08/2015 13:54	AMAR379.9.20150804T135423Z.wav_chan0.xml	0	0
04/08/2015 14:02	AMAR379.9.20150804T140223Z.wav_chan0.xml	0	0
04/08/2015 14:10	AMAR379.9.20150804T141023Z.wav_chan0.xml	0	0
04/08/2015 14:18	AMAR379.9.20150804T141823Z.wav_chan0.xml	0	0
04/08/2015 14:26	AMAR379.9.20150804T142623Z.wav_chan0.xml	0	0
04/08/2015 14:34	AMAR379.9.20150804T143423Z.wav_chan0.xml	0	0
04/08/2015 14:42	AMAR379.9.20150804T144223Z.wav_chan0.xml	0	0
04/08/2015 14:50	AMAR379.9.20150804T145023Z.wav_chan0.xml	0	0
04/08/2015 14:58	AMAR379.9.20150804T145823Z.wav_chan0.xml	0	0
04/08/2015 15:06	AMAR379.9.20150804T150623Z.wav_chan0.xml	0	0
04/08/2015 15:14	AMAR379.9.20150804T151423Z.wav_chan0.xml	0	0
04/08/2015 15:22	AMAR379.9.20150804T152223Z.wav_chan0.xml	0	0
04/08/2015 15:30	AMAR379.9.20150804T153023Z.wav_chan0.xml	0	0
04/08/2015 15:38	AMAR379.9.20150804T153823Z.wav_chan0.xml	0	0
04/08/2015 15:46	AMAR379.9.20150804T154623Z.wav_chan0.xml	0	0
04/08/2015 15:54	AMAR379.9.20150804T155423Z.wav_chan0.xml	0	0
04/08/2015 16:02	AMAR379.9.20150804T160223Z.wav_chan0.xml	0	0
04/08/2015 16:10	AMAR379.9.20150804T161023Z.wav_chan0.xml	0	0
04/08/2015 16:18	AMAR379.9.20150804T161823Z.wav_chan0.xml	0	0
04/08/2015 16:26	AMAR379.9.20150804T162623Z.wav_chan0.xml	0	0
04/08/2015 16:34	AMAR379.9.20150804T163423Z.wav_chan0.xml	0	0
04/08/2015 16:42	AMAR379.9.20150804T164223Z.wav_chan0.xml	0	0
04/08/2015 16:50	AMAR379.9.20150804T165023Z.wav_chan0.xml	0	0
04/08/2015 16:58	AMAR379.9.20150804T165823Z.wav_chan0.xml	0	0
04/08/2015 17:06	AMAR379.9.20150804T170623Z.wav_chan0.xml	0	0
04/08/2015 17:14	AMAR379.9.20150804T171423Z.wav_chan0.xml	0	0
04/08/2015 17:22	AMAR379.9.20150804T172223Z.wav_chan0.xml	0	0
04/08/2015 17:30	AMAR379.9.20150804T173023Z.wav_chan0.xml	0	0
04/08/2015 17:38	AMAR379.9.20150804T173823Z.wav_chan0.xml	0	0
04/08/2015 17:46	AMAR379.9.20150804T174623Z.wav_chan0.xml	0	0
04/08/2015 17:54	AMAR379.9.20150804T175423Z.wav_chan0.xml	0	0
04/08/2015 18:02	AMAR379.9.20150804T180223Z.wav_chan0.xml	0	0
04/08/2015 18:10	AMAR379.9.20150804T181023Z.wav_chan0.xml	0	0
04/08/2015 18:18	AMAR379.9.20150804T181823Z.wav_chan0.xml	0	0
04/08/2015 18:26	AMAR379.9.20150804T182623Z.wav_chan0.xml	0	0
04/08/2015 18:34	AMAR379.9.20150804T183423Z.wav_chan0.xml	0	0
04/08/2015 18:42	AMAR379.9.20150804T184223Z.wav_chan0.xml	0	0
04/08/2015 18:50	AMAR379.9.20150804T185023Z.wav_chan0.xml	0	0
04/08/2015 18:58	AMAR379.9.20150804T185823Z.wav_chan0.xml	0	0
04/08/2015 19:06	AMAR379.9.20150804T190623Z.wav_chan0.xml	0	0
04/08/2015 19:14	AMAR379.9.20150804T191423Z.wav_chan0.xml	0	0
04/08/2015 19:22	AMAR379.9.20150804T192223Z.wav_chan0.xml	0	0
04/08/2015 19:30	AMAR379.9.20150804T193023Z.wav_chan0.xml	0	0
04/08/2015 19:38	AMAR379.9.20150804T193823Z.wav_chan0.xml	0	0
04/08/2015 19:46	AMAR379.9.20150804T194623Z.wav_chan0.xml	0	0
04/08/2015 19:54	AMAR379.9.20150804T195423Z.wav_chan0.xml	0	0
04/08/2015 20:02	AMAR379.9.20150804T200223Z.wav_chan0.xml	0	0
04/08/2015 20:10	AMAR379.9.20150804T201023Z.wav_chan0.xml	0	0
04/08/2015 20:18	AMAR379.9.20150804T201823Z.wav_chan0.xml	0	0
04/08/2015 20:26	AMAR379.9.20150804T202623Z.wav_chan0.xml	0	0
04/08/2015 20:34	AMAR379.9.20150804T203423Z.wav_chan0.xml	0	0
04/08/2015 20:42	AMAR379.9.20150804T204223Z.wav_chan0.xml	0	0
04/08/2015 20:50	AMAR379.9.20150804T205023Z.wav_chan0.xml	0	0
04/08/2015 20:58	AMAR379.9.20150804T205823Z.wav_chan0.xml	0	0
04/08/2015 21:06	AMAR379.9.20150804T210623Z.wav_chan0.xml	0	0
04/08/2015 21:14	AMAR379.9.20150804T211423Z.wav_chan0.xml	0	0
04/08/2015 21:22	AMAR379.9.20150804T212223Z.wav_chan0.xml	0	0
04/08/2015 21:30	AMAR379.9.20150804T213023Z.wav_chan0.xml	0	0
04/08/2015 21:38	AMAR379.9.20150804T213823Z.wav_chan0.xml	0	0
04/08/2015 21:46	AMAR379.9.20150804T214623Z.wav_chan0.xml	0	0
04/08/2015 21:54	AMAR379.9.20150804T215423Z.wav_chan0.xml	0	0
04/08/2015 22:02	AMAR379.9.20150804T220223Z.wav_chan0.xml	0	0
04/08/2015 22:10	AMAR379.9.20150804T221023Z.wav_chan0.xml	0	0
04/08/2015 22:18	AMAR379.9.20150804T221823Z.wav_chan0.xml	0	0
04/08/2015 22:26	AMAR379.9.20150804T222623Z.wav_chan0.xml	0	0
04/08/2015 22:34	AMAR379.9.20150804T223423Z.wav_chan0.xml	0	0
04/08/2015 22:42	AMAR379.9.20150804T224223Z.wav_chan0.xml	0	0
04/08/2015 22:50	AMAR379.9.20150804T225023Z.wav_chan0.xml	0	0
04/08/2015 22:58	AMAR379.9.20150804T225823Z.wav_chan0.xml	0	0
04/08/2015 23:06	AMAR379.9.20150804T230623Z.wav_chan0.xml	0	0
04/08/2015 23:14	AMAR379.9.20150804T231423Z.wav_chan0.xml	0	0
04/08/2015 23:22	AMAR379.9.20150804T232223Z.wav_chan0.xml	0	0
04/08/2015 23:30	AMAR379.9.20150804T233023Z.wav_chan0.xml	0	0
04/08/2015 23:38	AMAR379.9.20150804T233823Z.wav_chan0.xml	0	0
04/08/2015 23:46	AMAR379.9.20150804T234623Z.wav_chan0.xml	0	0
04/08/2015 23:54	AMAR379.9.20150804T235423Z.wav_chan0.xml	0	0
04/07/2015 0:02	AMAR379.9.20150704T000223Z.wav_chan0.xml	0	0
04/07/2015 0:10	AMAR379.9.20150704T001023Z.wav_chan0.xml	0	0
04/07/2015 0:18	AMAR379.9.20150704T001823Z.wav_chan0.xml	0	0
04/07/2015 0:26	AMAR379.9.20150704T002623Z.wav_chan0.xml	0	0
04/07/2015 0:34	AMAR379.9.20150704T003423Z.wav_chan0.xml	0	0
04/07/2015 0:42	AMAR379.9.20150704T004223Z.wav_chan0.xml	0	0
04/07/2015 0:50	AMAR379.9.20150704T005023Z.wav_chan0.xml	0	0
04/07/2015 0:58	AMAR379.9.20150704T005823Z.wav_chan0.xml	0	0
04/07/2015 1:06	AMAR379.9.20150704T010623Z.wav_chan0.xml	0	0
04/07/2015 1:14	AMAR379.9.20150704T011423Z.wav_chan0.xml	0	0
04/07/2015 1:22	AMAR379.9.20150704T012223Z.wav_chan0.xml	0	0
04/07/2015 1:30	AMAR379.9.20150704T013023Z.wav_chan0.xml	0	0
04/07/2015 1:38	AMAR379.9.20150704T013823Z.wav_chan0.xml	0	0
04/07/2015 1:46	AMAR379.9.20150704T014623Z.wav_chan0.xml	0	0
04/07/2015 1:54	AMAR379.9.20150704T015423Z.wav_chan0.xml	0	0
04/07/2015 2:02	AMAR379.9.20150704T020223Z.wav_chan0.xml	0	0
04/07/2015 2:10	AMAR379.9.20150704T021023Z.wav_chan0.xml	0	0
04/07/2015 2:18	AMAR379.9.20150704T021823Z.wav_chan0.xml	0	0
04/07/2015 2:26	AMAR379.9.20150704T022623Z.wav_chan0.xml	0	0
04/07/2015 2:34	AMAR379.9.20150704T023423Z.wav_chan0.xml	0	0
04/07/2015 2:42	AMAR379.9.20150704T024223Z.wav_chan0.xml	0	0
04/07/2015 2:50	AMAR379.9.20150704T025023Z.wav_chan0.xml	0	0
04/07/2015 2:58	AMAR379.9.20150704T025823Z.wav_chan0.xml	0	0
04/07/2015 3:06	AMAR379.9.20150704T030623Z.wav_chan0.xml	0	0
04/07/2015 3:14	AMAR379.9.20150704T031423Z.wav_chan0.xml	0	0
04/07/2015 3:22	AMAR379.9.20150704T032223Z.wav_chan0.xml	0	0
04/07/2015 3:30	AMAR379.9.20150704T033023Z.wav_chan0.xml	0	0
04/07/2015 3:38	AMAR379.9.20150704T033823Z.wav_chan0.xml	0	0
04/07/2015 3:46	AMAR379.9.20150704T034623Z.wav_chan0.xml	0	0
04/07/2015 3:54	AMAR379.9.20150704T035423Z.wav_chan0.xml	0	0
04/07/2015 4:02	AMAR379.9.20150704T040223Z.wav_chan0.xml	0	0
04/07/2015 4:10	AMAR379.9.20150704T041023Z.wav_chan0.xml	0	0
04/07/2015 4:18	AMAR379.9.20150704T041823Z.wav_chan0.xml	0	0
04/07/2015 4:26	AMAR379.9.20150704T042623Z.wav_chan0.xml	0	0
04/07/2015 4:34	AMAR379.9.20150704T043423Z.wav_chan0.xml	0	0
04/07/2015 4:42	AMAR379.9.20150704T044223Z.wav_chan0.xml	0	0
04/07/2015 4:50	AMAR379.9.20150704T045023Z.wav_chan0.xml	0	0
04/07/2015 4:58	AMAR379.9.20150704T045823Z.wav_chan0.xml	0	0
04/07/2015 5:06	AMAR379.9.20150704T050623Z.wav_chan0.xml	0	0
04/07/2015 5:14	AMAR379.9.20150704T051423Z.wav_chan0.xml	0	0
04/07/2015 5:22	AMAR379.9.20150704T052223Z.wav_chan0.xml	0	0
04/07/2015 5:30	AMAR379.9.20150704T053023Z.wav_chan0.xml	0	0
04/07/2015 5:38	AMAR379.9.20150704T053823Z.wav_chan0.xml	0	0
04/07/2015 5:46	AMAR379.9.20150704T054623Z.wav_chan0.xml	0	0
04/07/2015 5:54	AMAR379.9.20150704T055423Z.wav_chan0.xml	0	0
04/07/2015 6:02	AMAR379.9.20150704T060223Z.wav_chan0.xml	0	0
04/07/2015 6:10	AMAR379.9.20150704T061023Z.wav_chan0.xml	0	0
04/07/2015 6:18	AMAR379.9.20150704T061823Z.wav_chan0.xml	0	0
04/07/2015 6:26	AMAR379.9.20150704T062623Z.wav_chan0.xml	0	0
04/07/2015 6:34	AMAR379.9.20150704T063423Z.wav_chan0.xml	0	0
04/07/2015 6:42	AMAR379.9.20150704T064223Z.wav_chan0.xml	0	0
04/07/2015 6:50	AMAR379.9.20150704T065023Z.wav_chan0.xml	0	0
04/07/2015 6:58	AMAR379.9.20150704T065823Z.wav_chan0.xml	0	0
04/07/2015 7:06	AMAR379.9.20150704T070623Z.wav_chan0.xml	0	0
04/07/2015 7:14	AMAR379.9.20150704T071423Z.wav_chan0.xml	0	0
04/07/2015 7:22	AMAR379.9.20150704T072223Z.wav_chan0.xml	0	0
04/07/2015 7:30	AMAR379.9.20150704T073023Z.wav_chan0.xml	0	0
04/07/2015 7:38	AMAR379.9.20150704T073823Z.wav_chan0.xml	0	0
04/07/2015 7:46	AMAR379.9.20150704T074623Z.wav_chan0.xml	0	0
04/07/2015 7:54	AMAR379.9.20150704T075423Z.wav_chan0.xml	0	0
04/07/2015 8:02	AMAR379.9.20150704T080223Z.wav_chan0.xml	0	0
04/07/2015 8:10	AMAR379.9.20150704T081023Z.wav_chan0.xml	0	0
04/07/2015 8:18	AMAR379.9.20150704T081823Z.wav_chan0.xml	0	0
04/07/2015 8:26	AMAR379.9.20150704T082623Z.wav_chan0.xml	0	0
04/07/2015 8:34	AMAR379.9.20150704T083423Z.wav_chan0.xml	0	0
04/07/2015 8:42	AMAR379.9.20150704T084223Z.wav_chan0.xml	0	0
04/07/2015 8:50	AMAR379.9.20150704T085023Z.wav_chan0.xml	0	0
04/07/2015 8:58	AMAR379.9.20150704T085823Z.wav_chan0.xml	0	0
04/07/2015 9:06	AMAR379.9.20150704T090623Z.wav_chan0.xml	0	0
04/07/2015 9:14	AMAR379.9.20150704T091423Z.wav_chan0.xml	0	0
04/07/2015 9:22	AMAR379.9.20150704T092223Z.wav_chan0.xml	0	0
04/07/2015 9:30	AMAR379.9.20150704T093023Z.wav_chan0.xml	0	0
04/07/2015 9:38	AMAR379.9.20150704T093823Z.wav_chan0.xml	0	0
04/07/2015 9:46	AMAR379.9.20150704T094623Z.wav_chan0.xml	0	0
04/07/2015 9:54	AMAR379.9.20150704T095423Z.wav_chan0.xml	0	0
04/07/2015 10:02	AMAR379.9.20150704T100223Z.wav_chan0.xml	0	0
04/07/2015 10:10	AMAR379.9.20150704T101023Z.wav_chan0.xml	0	0
04/07/2015 10:18	AMAR379.9.20150704T101823Z.wav_chan0.xml	0	0
04/07/2015 10:26	AMAR379.9.20150704T102623Z.wav_chan0.xml	0	0
04/07/2015 10:34	AMAR379.9.20150704T103423Z.wav_chan0.xml	0	0
04/07/2015 10:42	AMAR379.9.20150704T104223Z.wav_chan0.xml	0	0
04/07/2015 10:50	AMAR379.9.20150704T105023Z.wav_chan0.xml	0	0
04/07/2015 10:58	AMAR379.9.20150704T105823Z.wav_chan0.xml	0	0
04/07/2015 11:06	AMAR379.9.20150704T110623Z.wav_chan0.xml	0	0
04/07/2015 11:14	AMAR379.9.20150704T111423Z.wav_chan0.xml	0	0
04/07/2015 11:22	AMAR379.9.20150704T112223Z.wav_chan0.xml	0	0
04/07/2015 11:30	AMAR379.9.20150704T113023Z.wav_chan0.xml	0	0
04/07/2015 11:38	AMAR379.9.20150704T113823Z.wav_chan0.xml	0	0
04/07/2015 11:46	AMAR379.9.20150704T114623Z.wav_chan0.xml	0	0
04/07/2015 11:54	AMAR379.9.20150704T115423Z.wav_chan0.xml	0	0
04/07/2015 12:02	AMAR379.9.20150704T120223Z.wav_chan0.xml	0	0
04/07/2015 12:10	AMAR379.9.20150704T121023Z.wav_chan0.xml	0	0
04/07/2015 12:18	AMAR379.9.20150704T121823Z.wav_chan0.xml	0	0
04/07/2015 12:26	AMAR379.9.20150704T122623Z.wav_chan0.xml	0	0
04/07/2015 12:34	AMAR379.9.20150704T123423Z.wav_chan0.xml	0	0
04/07/2015 12:42	AMAR379.9.20150704T124223Z.wav_chan0.xml	0	0
04/07/2015 12:50	AMAR379.9.20150704T125023Z.wav_chan0.xml	0	0
04/07/2015 12:58	AMAR379.9.20150704T125823Z.wav_chan0.xml	0	0
04/07/2015 13:06	AMAR379.9.20150704T130623Z.wav_chan0.xml	0	0
04/07/2015 13:14	AMAR379.9.20150704T131423Z.wav_chan0.xml	0	0
04/07/2015 13:22	AMAR379.9.20150704T132223Z.wav_chan0.xml	0	0
04/07/2015 13:30	AMAR379.9.20150704T133023Z.wav_chan0.xml	0	0
04/07/2015 13:38	AMAR379.9.20150704T133823Z.wav_chan0.xml	0	0
04/07/2015 13:46	AMAR379.9.20150704T134623Z.wav_chan0.xml	0	0
04/07/2015 13:54	AMAR379.9.20150704T135423Z.wav_chan0.xml	0	0
04/07/2015 14:02	AMAR379.9.20150704T140223Z.wav_chan0.xml	0	0
04/07/2015 14:10	AMAR379.9.20150704T141023Z.wav_chan0.xml	0	0
04/07/2015 14:18	AMAR379.9.20150704T141823Z.wav_chan0.xml	0	0
04/07/2015 14:26	AMAR379.9.20150704T142623Z.wav_chan0.xml	0	0
04/07/2015 14:34	AMAR379.9.20150704T143423Z.wav_chan0.xml	0	0
04/07/2015 14:42	AMAR379.9.20150704T144223Z.wav_chan0.xml	0	0
04/07/2015 14:50	AMAR379.9.20150704T145023Z.wav_chan0.xml	0	0
04/07/2015 14:58	AMAR379.9.20150704T145823Z.wav_chan0.xml	0	0
04/07/2015 15:06	AMAR379.9.20150704T150623Z.wav_chan0.xml	0	0
04/07/2015 15:14	AMAR379.9.20150704T151423Z.wav_chan0.xml	0	0
04/07/2015 15:22	AMAR379.9.20150704T152223Z.wav_chan0.xml	0	0
04/07/2015 15:30	AMAR379.9.20150704T153023Z.wav_chan0.xml	0	0
04/07/2015 15:38	AMAR379.9.20150704T153823Z.wav_chan0.xml	0	0
04/07/2015 15:46	AMAR379.9.20150704T154623Z.wav_chan0.xml	0	0
04/07/2015 15:54	AMAR379.9.20150704T155423Z.wav_chan0.xml	0	0
04/07/2015 16:02	AMAR379.9.20150704T160223Z.wav_chan0.xml	0	0
04/07/2015 16:10	AMAR379.9.20150704T161023Z.wav_chan0.xml	0	0
04/07/2015 16:18	AMAR379.9.20150704T161823Z.wav_chan0.xml	0	0
04/07/2015 16:26	AMAR379.9.20150704T162623Z.wav_chan0.xml	0	0
04/07/2015 16:34	AMAR379.9.20150704T163423Z.wav_chan0.xml	0	0
04/07/2015 16:42	AMAR379.9.20150704T164223Z.wav_chan0.xml	0	0
04/07/2015 16:50	AMAR379.9.20150704T165023Z.wav_chan0.xml	0	0
04/07/2015 16:58	AMAR379.9.20150704T165823Z.wav_chan0.xml	0	0
04/07/2015 17:06	AMAR379.9.20150704T170623Z.wav_chan0.xml	0	0
04/07/2015 17:14	AMAR379.9.20150704T171423Z.wav_chan0.xml	0	0
04/07/2015 17:22	AMAR379.9.20150704T172223Z.wav_chan0.xml	0	0
04/07/2015 17:30	AMAR379.9.20150704T173023Z.wav_chan0.xml	0	0
04/07/2015 17:38	AMAR379.9.20150704T173823Z.wav_chan0.xml	0	0
04/07/2015 17:46	AMAR379.9.20150704T174623Z.wav_chan0.xml	0	0
04/07/2015 17:54	AMAR379.9.20150704T175423Z.wav_chan0.xml	0	0
04/07/2015 18:02	AMAR379.9.20150704T180223Z.wav_chan0.xml	0	0
04/07/2015 18:10	AMAR379.9.20150704T181023Z.wav_chan0.xml	0	0
04/07/2015 18:18	AMAR379.9.20150704T181823Z.wav_chan0.xml	0	0
04/07/2015 18:26	AMAR379.9.20150704T182623Z.wav_chan0.xml	0	0
04/07/2015 18:34	AMAR379.9.20150704T183423Z.wav_chan0.xml	0	0
04/07/2015 18:42	AMAR379.9.20150704T184223Z.wav_chan0.xml	0	0
04/07/2015 18:50	AMAR379.9.20150704T185023Z.wav_chan0.xml	0	0
04/07/2015 18:58	AMAR379.9.20150704T185823Z.wav_chan0.xml	0	0
04/07/2015 19:06	AMAR379.9.20150704T190623Z.wav_chan0.xml	0	0
04/07/2015 19:14	AMAR379.9.20150704T191423Z.wav_chan0.xml	0	0
04/07/2015 19:22	AMAR379.9.20150704T192223Z.wav_chan0.xml	0	0
04/07/2015 19:30	AMAR379.9.20150704T193023Z.wav_chan0.xml	0	0
04/07/2015 19:38	AMAR379.9.20150704T193823Z.wav_chan0.xml	0	0
04/07/2015 19:46	AMAR379.9.20150704T194623Z.wav_chan0.xml	0	0
04/07/2015 19:54	AMAR379.9.20150704T195423Z.wav_chan0.xml	0	0
04/07/2015 20:02	AMAR379.9.20150704T200223Z.wav_chan0.xml	0	0
04/07/2015 20:10	AMAR379.9.20150704T201023Z.wav_chan0.xml	0	0
04/07/2015 20:18	AMAR379.9.20150704T201823Z.wav_chan0.xml	0	0
04/07/2015 20:26	AMAR379.9.20150704T202623Z.wav_chan0.xml	0	0
04/07/2015 20:34	AMAR379.9.20150704T203423Z.wav_chan0.xml	0	0
04/07/2015 20:42	AMAR379.9.20150704T204223Z.wav_chan0.xml	0	0
04/07/2015 20:50	AMAR379.9.20150704T205023Z.wav_chan0.xml	0	0
04/07/2015 20:58	AMAR379.9.20150704T205823Z.wav_chan0.xml	0	0
04/07/2015 21:06	AMAR379.9.20150704T210623Z.wav_chan0.xml	0	0
04/07/2015 21:14	AMAR379.9.20150704T211423Z.wav_chan0.xml	0	0
04/07/2015 21:22	AMAR379.9.20150704T212223Z.wav_chan0.xml	0	0
04/07/2015 21:30	AMAR379.9.20150704T213023Z.wav_chan0.xml	0	0
04/07/2015 21:38	AMAR379.9.20150704T213823Z.wav_chan0.xml	0	0
04/07/2015 21:46	AMAR379.9.20150704T214623Z.wav_chan0.xml	0	0
04/07/2015 21:54	AMAR379.9.20150704T215423Z.wav_chan0.xml	0	0
04/07/2015 22:02	AMAR379.9.20150704T220223Z.wav_chan0.xml	0	0
04/07/2015 22:10	AMAR379.9.20150704T221023Z.wav_chan0.xml	0	0
04/07/2015 22:18	AMAR379.9.20150704T221823Z.wav_chan0.xml	0	0
04/07/2015 22:26	AMAR379.9.20150704T222623Z.wav_chan0.xml	0	0
04/07/2015 22:34	AMAR379.9.20150704T223423Z.wav_chan0.xml	0	0
04/07/2015 22:42	AMAR379.9.20150704T224223Z.wav_chan0.xml	0	0
04/07/2015 22:50	AMAR379.9.20150704T225023Z.wav_chan0.xml	0	0
04/07/2015 22:58	AMAR379.9.20150704T225823Z.wav_chan0.xml	0	0
04/07/2015 23:06	AMAR379.9.20150704T230623Z.wav_chan0.xml	0	0
04/07/2015 23:14	AMAR379.9.20150704T231423Z.wav_chan0.xml	0	0
04/07/2015 23:22	AMAR379.9.20150704T232223Z.wav_chan0.xml	0	0
04/07/2015 23:30	AMAR379.9.20150704T233023Z.wav_chan0.xml	1	0
04/07/2015 23:38	AMAR379.9.20150704T233823Z.wav_chan0.xml	0	0
04/07/2015 23:46	AMAR379.9.20150704T234623Z.wav_chan0.xml	0	0
04/07/2015 23:54	AMAR379.9.20150704T235423Z.wav_chan0.xml	0	0
04/06/2015 0:02	AMAR379.9.20150604T000223Z.wav_chan0.xml	0	0
04/06/2015 0:10	AMAR379.9.20150604T001023Z.wav_chan0.xml	0	0
04/06/2015 0:18	AMAR379.9.20150604T001823Z.wav_chan0.xml	0	0
04/06/2015 0:26	AMAR379.9.20150604T002623Z.wav_chan0.xml	0	0
04/06/2015 0:34	AMAR379.9.20150604T003423Z.wav_chan0.xml	0	0
04/06/2015 0:42	AMAR379.9.20150604T004223Z.wav_chan0.xml	0	0
04/06/2015 0:50	AMAR379.9.20150604T005023Z.wav_chan0.xml	0	0
04/06/2015 0:58	AMAR379.9.20150604T005823Z.wav_chan0.xml	0	0
04/06/2015 1:06	AMAR379.9.20150604T010623Z.wav_chan0.xml	0	0
04/06/2015 1:14	AMAR379.9.20150604T011423Z.wav_chan0.xml	0	0
04/06/2015 1:22	AMAR379.9.20150604T012223Z.wav_chan0.xml	0	0
04/06/2015 1:30	AMAR379.9.20150604T013023Z.wav_chan0.xml	0	0
04/06/2015 1:38	AMAR379.9.20150604T013823Z.wav_chan0.xml	0	0
04/06/2015 1:46	AMAR379.9.20150604T014623Z.wav_chan0.xml	0	0
04/06/2015 1:54	AMAR379.9.20150604T015423Z.wav_chan0.xml	0	0
04/06/2015 2:02	AMAR379.9.20150604T020223Z.wav_chan0.xml	0	0
04/06/2015 2:10	AMAR379.9.20150604T021023Z.wav_chan0.xml	0	0
04/06/2015 2:18	AMAR379.9.20150604T021823Z.wav_chan0.xml	0	0
04/06/2015 2:26	AMAR379.9.20150604T022623Z.wav_chan0.xml	0	0
[truncated: 17,062 more rows]
