# Supplementary material for: Signals from the deep: Spatial and temporal acoustic occurrence of beaked whales off western Ireland
Source: PLoS One. 2018 Jun 21;13(6):e0199431. doi: 10.1371/journal.pone.0199431 (PMC6013249; doi:10.1371/journal.pone.0199431)
Supplement: S3 Dataset — (CSV) [file pone.0199431.s003.csv]

Time	File	Cuviers	northern bottlenose
01/12/2015 0:06	AMAR378.9.20151201T000628Z.wav_chan0.xml	0	0
01/12/2015 0:14	AMAR378.9.20151201T001428Z.wav_chan0.xml	0	0
01/12/2015 0:22	AMAR378.9.20151201T002228Z.wav_chan0.xml	0	0
01/12/2015 0:30	AMAR378.9.20151201T003028Z.wav_chan0.xml	0	0
01/12/2015 0:38	AMAR378.9.20151201T003828Z.wav_chan0.xml	0	0
01/12/2015 0:46	AMAR378.9.20151201T004628Z.wav_chan0.xml	0	0
01/12/2015 0:54	AMAR378.9.20151201T005428Z.wav_chan0.xml	0	0
01/12/2015 1:02	AMAR378.9.20151201T010228Z.wav_chan0.xml	0	0
01/12/2015 1:10	AMAR378.9.20151201T011028Z.wav_chan0.xml	0	0
01/12/2015 1:18	AMAR378.9.20151201T011828Z.wav_chan0.xml	0	0
01/12/2015 1:26	AMAR378.9.20151201T012628Z.wav_chan0.xml	0	0
01/12/2015 1:34	AMAR378.9.20151201T013428Z.wav_chan0.xml	0	0
01/12/2015 1:42	AMAR378.9.20151201T014228Z.wav_chan0.xml	0	0
01/12/2015 1:50	AMAR378.9.20151201T015028Z.wav_chan0.xml	0	0
01/12/2015 1:58	AMAR378.9.20151201T015828Z.wav_chan0.xml	0	0
01/12/2015 2:06	AMAR378.9.20151201T020628Z.wav_chan0.xml	0	0
01/12/2015 2:14	AMAR378.9.20151201T021428Z.wav_chan0.xml	0	0
01/12/2015 2:22	AMAR378.9.20151201T022228Z.wav_chan0.xml	0	0
01/12/2015 2:30	AMAR378.9.20151201T023028Z.wav_chan0.xml	0	0
01/12/2015 2:38	AMAR378.9.20151201T023828Z.wav_chan0.xml	0	0
01/12/2015 2:46	AMAR378.9.20151201T024628Z.wav_chan0.xml	0	0
01/12/2015 2:54	AMAR378.9.20151201T025428Z.wav_chan0.xml	0	0
01/12/2015 3:02	AMAR378.9.20151201T030228Z.wav_chan0.xml	0	0
01/12/2015 3:10	AMAR378.9.20151201T031028Z.wav_chan0.xml	0	0
01/12/2015 3:18	AMAR378.9.20151201T031828Z.wav_chan0.xml	0	0
01/12/2015 3:26	AMAR378.9.20151201T032628Z.wav_chan0.xml	0	0
01/12/2015 3:34	AMAR378.9.20151201T033428Z.wav_chan0.xml	0	0
01/12/2015 3:42	AMAR378.9.20151201T034228Z.wav_chan0.xml	0	0
01/12/2015 3:50	AMAR378.9.20151201T035028Z.wav_chan0.xml	0	0
01/12/2015 3:58	AMAR378.9.20151201T035828Z.wav_chan0.xml	0	0
01/12/2015 4:06	AMAR378.9.20151201T040628Z.wav_chan0.xml	0	0
01/12/2015 4:14	AMAR378.9.20151201T041428Z.wav_chan0.xml	0	0
01/12/2015 4:22	AMAR378.9.20151201T042228Z.wav_chan0.xml	0	0
01/12/2015 4:30	AMAR378.9.20151201T043028Z.wav_chan0.xml	0	0
01/12/2015 4:38	AMAR378.9.20151201T043828Z.wav_chan0.xml	0	0
01/12/2015 4:46	AMAR378.9.20151201T044628Z.wav_chan0.xml	0	0
01/12/2015 4:54	AMAR378.9.20151201T045428Z.wav_chan0.xml	0	0
01/12/2015 5:02	AMAR378.9.20151201T050228Z.wav_chan0.xml	0	0
01/12/2015 5:10	AMAR378.9.20151201T051028Z.wav_chan0.xml	0	0
01/12/2015 5:18	AMAR378.9.20151201T051828Z.wav_chan0.xml	0	0
01/12/2015 5:26	AMAR378.9.20151201T052628Z.wav_chan0.xml	0	0
01/12/2015 5:34	AMAR378.9.20151201T053428Z.wav_chan0.xml	0	0
01/12/2015 5:42	AMAR378.9.20151201T054228Z.wav_chan0.xml	0	0
01/12/2015 5:50	AMAR378.9.20151201T055028Z.wav_chan0.xml	0	0
01/12/2015 5:58	AMAR378.9.20151201T055828Z.wav_chan0.xml	0	0
01/12/2015 6:06	AMAR378.9.20151201T060628Z.wav_chan0.xml	0	0
01/12/2015 6:14	AMAR378.9.20151201T061428Z.wav_chan0.xml	0	0
01/12/2015 6:22	AMAR378.9.20151201T062228Z.wav_chan0.xml	0	0
01/12/2015 6:30	AMAR378.9.20151201T063028Z.wav_chan0.xml	0	0
01/12/2015 6:38	AMAR378.9.20151201T063828Z.wav_chan0.xml	0	0
01/12/2015 6:46	AMAR378.9.20151201T064628Z.wav_chan0.xml	0	0
01/12/2015 6:54	AMAR378.9.20151201T065428Z.wav_chan0.xml	0	0
01/12/2015 7:02	AMAR378.9.20151201T070228Z.wav_chan0.xml	0	0
01/12/2015 7:10	AMAR378.9.20151201T071028Z.wav_chan0.xml	0	0
01/12/2015 7:18	AMAR378.9.20151201T071828Z.wav_chan0.xml	0	0
01/12/2015 7:26	AMAR378.9.20151201T072628Z.wav_chan0.xml	0	0
01/12/2015 7:34	AMAR378.9.20151201T073428Z.wav_chan0.xml	0	0
01/12/2015 7:42	AMAR378.9.20151201T074228Z.wav_chan0.xml	0	0
01/12/2015 7:50	AMAR378.9.20151201T075028Z.wav_chan0.xml	0	0
01/12/2015 7:58	AMAR378.9.20151201T075828Z.wav_chan0.xml	0	0
01/12/2015 8:06	AMAR378.9.20151201T080628Z.wav_chan0.xml	0	0
01/12/2015 8:14	AMAR378.9.20151201T081428Z.wav_chan0.xml	0	0
01/12/2015 8:22	AMAR378.9.20151201T082228Z.wav_chan0.xml	0	0
01/12/2015 8:30	AMAR378.9.20151201T083028Z.wav_chan0.xml	0	0
01/12/2015 8:38	AMAR378.9.20151201T083828Z.wav_chan0.xml	0	0
01/12/2015 8:46	AMAR378.9.20151201T084628Z.wav_chan0.xml	0	0
01/12/2015 8:54	AMAR378.9.20151201T085428Z.wav_chan0.xml	0	0
01/12/2015 9:02	AMAR378.9.20151201T090228Z.wav_chan0.xml	0	0
01/12/2015 9:10	AMAR378.9.20151201T091028Z.wav_chan0.xml	0	0
01/12/2015 9:18	AMAR378.9.20151201T091828Z.wav_chan0.xml	0	0
01/12/2015 9:26	AMAR378.9.20151201T092628Z.wav_chan0.xml	0	0
01/12/2015 9:34	AMAR378.9.20151201T093428Z.wav_chan0.xml	0	0
01/12/2015 9:42	AMAR378.9.20151201T094228Z.wav_chan0.xml	0	0
01/12/2015 9:50	AMAR378.9.20151201T095028Z.wav_chan0.xml	0	0
01/12/2015 9:58	AMAR378.9.20151201T095828Z.wav_chan0.xml	1	0
01/12/2015 10:06	AMAR378.9.20151201T100628Z.wav_chan0.xml	0	0
01/12/2015 10:14	AMAR378.9.20151201T101428Z.wav_chan0.xml	0	0
01/12/2015 10:22	AMAR378.9.20151201T102228Z.wav_chan0.xml	0	0
01/12/2015 10:30	AMAR378.9.20151201T103028Z.wav_chan0.xml	0	0
01/12/2015 10:38	AMAR378.9.20151201T103828Z.wav_chan0.xml	0	0
01/12/2015 10:46	AMAR378.9.20151201T104628Z.wav_chan0.xml	0	0
01/12/2015 10:54	AMAR378.9.20151201T105428Z.wav_chan0.xml	0	0
01/12/2015 11:02	AMAR378.9.20151201T110228Z.wav_chan0.xml	0	0
01/12/2015 11:10	AMAR378.9.20151201T111028Z.wav_chan0.xml	0	0
01/12/2015 11:18	AMAR378.9.20151201T111828Z.wav_chan0.xml	0	0
01/12/2015 11:26	AMAR378.9.20151201T112628Z.wav_chan0.xml	0	0
01/12/2015 11:34	AMAR378.9.20151201T113428Z.wav_chan0.xml	0	0
01/12/2015 11:42	AMAR378.9.20151201T114228Z.wav_chan0.xml	0	0
01/12/2015 11:50	AMAR378.9.20151201T115028Z.wav_chan0.xml	0	0
01/12/2015 11:58	AMAR378.9.20151201T115828Z.wav_chan0.xml	0	0
01/12/2015 12:06	AMAR378.9.20151201T120628Z.wav_chan0.xml	0	0
01/12/2015 12:14	AMAR378.9.20151201T121428Z.wav_chan0.xml	0	0
01/12/2015 12:22	AMAR378.9.20151201T122228Z.wav_chan0.xml	0	0
01/12/2015 12:30	AMAR378.9.20151201T123028Z.wav_chan0.xml	0	0
01/12/2015 12:38	AMAR378.9.20151201T123828Z.wav_chan0.xml	0	0
01/12/2015 12:46	AMAR378.9.20151201T124628Z.wav_chan0.xml	0	0
01/12/2015 12:54	AMAR378.9.20151201T125428Z.wav_chan0.xml	0	0
01/12/2015 13:02	AMAR378.9.20151201T130228Z.wav_chan0.xml	0	0
01/12/2015 13:10	AMAR378.9.20151201T131028Z.wav_chan0.xml	0	0
01/12/2015 13:18	AMAR378.9.20151201T131828Z.wav_chan0.xml	0	0
01/12/2015 13:26	AMAR378.9.20151201T132628Z.wav_chan0.xml	0	0
01/12/2015 13:34	AMAR378.9.20151201T133428Z.wav_chan0.xml	0	0
01/12/2015 13:42	AMAR378.9.20151201T134228Z.wav_chan0.xml	0	0
01/12/2015 13:50	AMAR378.9.20151201T135028Z.wav_chan0.xml	0	0
01/12/2015 13:58	AMAR378.9.20151201T135828Z.wav_chan0.xml	0	0
01/12/2015 14:06	AMAR378.9.20151201T140628Z.wav_chan0.xml	0	0
01/12/2015 14:14	AMAR378.9.20151201T141428Z.wav_chan0.xml	0	0
01/12/2015 14:22	AMAR378.9.20151201T142228Z.wav_chan0.xml	0	0
01/12/2015 14:30	AMAR378.9.20151201T143028Z.wav_chan0.xml	0	0
01/12/2015 14:38	AMAR378.9.20151201T143828Z.wav_chan0.xml	0	0
01/12/2015 14:46	AMAR378.9.20151201T144628Z.wav_chan0.xml	0	0
01/12/2015 14:54	AMAR378.9.20151201T145428Z.wav_chan0.xml	0	0
01/12/2015 15:02	AMAR378.9.20151201T150228Z.wav_chan0.xml	0	0
01/12/2015 15:10	AMAR378.9.20151201T151028Z.wav_chan0.xml	0	0
01/12/2015 15:18	AMAR378.9.20151201T151828Z.wav_chan0.xml	0	0
01/12/2015 15:26	AMAR378.9.20151201T152628Z.wav_chan0.xml	0	0
01/12/2015 15:34	AMAR378.9.20151201T153428Z.wav_chan0.xml	0	0
01/12/2015 15:42	AMAR378.9.20151201T154228Z.wav_chan0.xml	0	0
01/12/2015 15:50	AMAR378.9.20151201T155028Z.wav_chan0.xml	0	0
01/12/2015 15:58	AMAR378.9.20151201T155828Z.wav_chan0.xml	0	0
01/12/2015 16:06	AMAR378.9.20151201T160628Z.wav_chan0.xml	0	0
01/12/2015 16:14	AMAR378.9.20151201T161428Z.wav_chan0.xml	0	0
01/12/2015 16:22	AMAR378.9.20151201T162228Z.wav_chan0.xml	0	0
01/12/2015 16:30	AMAR378.9.20151201T163028Z.wav_chan0.xml	0	0
01/12/2015 16:38	AMAR378.9.20151201T163828Z.wav_chan0.xml	0	0
01/12/2015 16:46	AMAR378.9.20151201T164628Z.wav_chan0.xml	0	0
01/12/2015 16:54	AMAR378.9.20151201T165428Z.wav_chan0.xml	0	0
01/12/2015 17:02	AMAR378.9.20151201T170228Z.wav_chan0.xml	0	0
01/12/2015 17:10	AMAR378.9.20151201T171028Z.wav_chan0.xml	0	0
01/12/2015 17:18	AMAR378.9.20151201T171828Z.wav_chan0.xml	0	0
01/12/2015 17:26	AMAR378.9.20151201T172628Z.wav_chan0.xml	0	0
01/12/2015 17:34	AMAR378.9.20151201T173428Z.wav_chan0.xml	0	0
01/12/2015 17:42	AMAR378.9.20151201T174228Z.wav_chan0.xml	0	0
01/12/2015 17:50	AMAR378.9.20151201T175028Z.wav_chan0.xml	0	0
01/12/2015 17:58	AMAR378.9.20151201T175828Z.wav_chan0.xml	0	0
01/12/2015 18:06	AMAR378.9.20151201T180628Z.wav_chan0.xml	0	0
01/12/2015 18:14	AMAR378.9.20151201T181428Z.wav_chan0.xml	0	0
01/12/2015 18:22	AMAR378.9.20151201T182228Z.wav_chan0.xml	0	0
01/12/2015 18:30	AMAR378.9.20151201T183028Z.wav_chan0.xml	0	0
01/12/2015 18:38	AMAR378.9.20151201T183828Z.wav_chan0.xml	0	0
01/12/2015 18:46	AMAR378.9.20151201T184628Z.wav_chan0.xml	0	0
01/12/2015 18:54	AMAR378.9.20151201T185428Z.wav_chan0.xml	0	0
01/12/2015 19:02	AMAR378.9.20151201T190228Z.wav_chan0.xml	0	0
01/12/2015 19:10	AMAR378.9.20151201T191028Z.wav_chan0.xml	0	0
01/12/2015 19:18	AMAR378.9.20151201T191828Z.wav_chan0.xml	0	0
01/12/2015 19:26	AMAR378.9.20151201T192628Z.wav_chan0.xml	0	0
01/12/2015 19:34	AMAR378.9.20151201T193428Z.wav_chan0.xml	0	0
01/12/2015 19:42	AMAR378.9.20151201T194228Z.wav_chan0.xml	0	0
01/12/2015 19:50	AMAR378.9.20151201T195028Z.wav_chan0.xml	0	0
01/12/2015 19:58	AMAR378.9.20151201T195828Z.wav_chan0.xml	0	0
01/12/2015 20:06	AMAR378.9.20151201T200628Z.wav_chan0.xml	0	0
01/12/2015 20:14	AMAR378.9.20151201T201428Z.wav_chan0.xml	0	0
01/12/2015 20:22	AMAR378.9.20151201T202228Z.wav_chan0.xml	0	0
01/12/2015 20:30	AMAR378.9.20151201T203028Z.wav_chan0.xml	0	0
01/12/2015 20:38	AMAR378.9.20151201T203828Z.wav_chan0.xml	0	0
01/12/2015 20:46	AMAR378.9.20151201T204628Z.wav_chan0.xml	0	0
01/12/2015 20:54	AMAR378.9.20151201T205428Z.wav_chan0.xml	0	0
01/12/2015 21:02	AMAR378.9.20151201T210228Z.wav_chan0.xml	0	0
01/12/2015 21:10	AMAR378.9.20151201T211028Z.wav_chan0.xml	0	0
01/12/2015 21:18	AMAR378.9.20151201T211828Z.wav_chan0.xml	0	0
01/12/2015 21:26	AMAR378.9.20151201T212628Z.wav_chan0.xml	0	0
01/12/2015 21:34	AMAR378.9.20151201T213428Z.wav_chan0.xml	0	0
01/12/2015 21:42	AMAR378.9.20151201T214228Z.wav_chan0.xml	0	0
01/12/2015 21:50	AMAR378.9.20151201T215028Z.wav_chan0.xml	0	0
01/12/2015 21:58	AMAR378.9.20151201T215828Z.wav_chan0.xml	0	0
01/12/2015 22:06	AMAR378.9.20151201T220628Z.wav_chan0.xml	0	0
01/12/2015 22:14	AMAR378.9.20151201T221428Z.wav_chan0.xml	0	0
01/12/2015 22:22	AMAR378.9.20151201T222228Z.wav_chan0.xml	0	0
01/12/2015 22:30	AMAR378.9.20151201T223028Z.wav_chan0.xml	0	0
01/12/2015 22:38	AMAR378.9.20151201T223828Z.wav_chan0.xml	0	0
01/12/2015 22:46	AMAR378.9.20151201T224628Z.wav_chan0.xml	0	0
01/12/2015 22:54	AMAR378.9.20151201T225428Z.wav_chan0.xml	0	0
01/12/2015 23:02	AMAR378.9.20151201T230228Z.wav_chan0.xml	0	0
01/12/2015 23:10	AMAR378.9.20151201T231028Z.wav_chan0.xml	0	0
01/12/2015 23:18	AMAR378.9.20151201T231828Z.wav_chan0.xml	0	0
01/12/2015 23:26	AMAR378.9.20151201T232628Z.wav_chan0.xml	0	0
01/12/2015 23:34	AMAR378.9.20151201T233428Z.wav_chan0.xml	0	0
01/12/2015 23:42	AMAR378.9.20151201T234228Z.wav_chan0.xml	0	0
01/12/2015 23:50	AMAR378.9.20151201T235028Z.wav_chan0.xml	0	0
01/12/2015 23:58	AMAR378.9.20151201T235828Z.wav_chan0.xml	0	0
01/11/2015 0:06	AMAR378.9.20151101T000628Z.wav_chan0.xml	0	0
01/11/2015 0:14	AMAR378.9.20151101T001428Z.wav_chan0.xml	0	0
01/11/2015 0:22	AMAR378.9.20151101T002228Z.wav_chan0.xml	0	0
01/11/2015 0:30	AMAR378.9.20151101T003028Z.wav_chan0.xml	0	0
01/11/2015 0:38	AMAR378.9.20151101T003828Z.wav_chan0.xml	0	0
01/11/2015 0:46	AMAR378.9.20151101T004628Z.wav_chan0.xml	0	0
01/11/2015 0:54	AMAR378.9.20151101T005428Z.wav_chan0.xml	0	0
01/11/2015 1:02	AMAR378.9.20151101T010228Z.wav_chan0.xml	0	0
01/11/2015 1:10	AMAR378.9.20151101T011028Z.wav_chan0.xml	0	0
01/11/2015 1:18	AMAR378.9.20151101T011828Z.wav_chan0.xml	0	0
01/11/2015 1:26	AMAR378.9.20151101T012628Z.wav_chan0.xml	0	0
01/11/2015 1:34	AMAR378.9.20151101T013428Z.wav_chan0.xml	0	0
01/11/2015 1:42	AMAR378.9.20151101T014228Z.wav_chan0.xml	0	0
01/11/2015 1:50	AMAR378.9.20151101T015028Z.wav_chan0.xml	0	0
01/11/2015 1:58	AMAR378.9.20151101T015828Z.wav_chan0.xml	0	0
01/11/2015 2:06	AMAR378.9.20151101T020628Z.wav_chan0.xml	0	0
01/11/2015 2:14	AMAR378.9.20151101T021428Z.wav_chan0.xml	0	0
01/11/2015 2:22	AMAR378.9.20151101T022228Z.wav_chan0.xml	0	0
01/11/2015 2:30	AMAR378.9.20151101T023028Z.wav_chan0.xml	0	0
01/11/2015 2:38	AMAR378.9.20151101T023828Z.wav_chan0.xml	0	0
01/11/2015 2:46	AMAR378.9.20151101T024628Z.wav_chan0.xml	0	0
01/11/2015 2:54	AMAR378.9.20151101T025428Z.wav_chan0.xml	0	0
01/11/2015 3:02	AMAR378.9.20151101T030228Z.wav_chan0.xml	0	0
01/11/2015 3:10	AMAR378.9.20151101T031028Z.wav_chan0.xml	0	0
01/11/2015 3:18	AMAR378.9.20151101T031828Z.wav_chan0.xml	0	0
01/11/2015 3:26	AMAR378.9.20151101T032628Z.wav_chan0.xml	0	0
01/11/2015 3:34	AMAR378.9.20151101T033428Z.wav_chan0.xml	0	0
01/11/2015 3:42	AMAR378.9.20151101T034228Z.wav_chan0.xml	0	0
01/11/2015 3:50	AMAR378.9.20151101T035028Z.wav_chan0.xml	0	0
01/11/2015 3:58	AMAR378.9.20151101T035828Z.wav_chan0.xml	0	0
01/11/2015 4:06	AMAR378.9.20151101T040628Z.wav_chan0.xml	0	0
01/11/2015 4:14	AMAR378.9.20151101T041428Z.wav_chan0.xml	0	0
01/11/2015 4:22	AMAR378.9.20151101T042228Z.wav_chan0.xml	0	0
01/11/2015 4:30	AMAR378.9.20151101T043028Z.wav_chan0.xml	0	0
01/11/2015 4:38	AMAR378.9.20151101T043828Z.wav_chan0.xml	0	0
01/11/2015 4:46	AMAR378.9.20151101T044628Z.wav_chan0.xml	0	0
01/11/2015 4:54	AMAR378.9.20151101T045428Z.wav_chan0.xml	0	0
01/11/2015 5:02	AMAR378.9.20151101T050228Z.wav_chan0.xml	0	0
01/11/2015 5:10	AMAR378.9.20151101T051028Z.wav_chan0.xml	0	0
01/11/2015 5:18	AMAR378.9.20151101T051828Z.wav_chan0.xml	0	0
01/11/2015 5:26	AMAR378.9.20151101T052628Z.wav_chan0.xml	0	0
01/11/2015 5:34	AMAR378.9.20151101T053428Z.wav_chan0.xml	0	0
01/11/2015 5:42	AMAR378.9.20151101T054228Z.wav_chan0.xml	0	0
01/11/2015 5:50	AMAR378.9.20151101T055028Z.wav_chan0.xml	0	0
01/11/2015 5:58	AMAR378.9.20151101T055828Z.wav_chan0.xml	0	0
01/11/2015 6:06	AMAR378.9.20151101T060628Z.wav_chan0.xml	0	0
01/11/2015 6:14	AMAR378.9.20151101T061428Z.wav_chan0.xml	0	0
01/11/2015 6:22	AMAR378.9.20151101T062228Z.wav_chan0.xml	0	0
01/11/2015 6:30	AMAR378.9.20151101T063028Z.wav_chan0.xml	0	0
01/11/2015 6:38	AMAR378.9.20151101T063828Z.wav_chan0.xml	0	0
01/11/2015 6:46	AMAR378.9.20151101T064628Z.wav_chan0.xml	0	0
01/11/2015 6:54	AMAR378.9.20151101T065428Z.wav_chan0.xml	0	0
01/11/2015 7:02	AMAR378.9.20151101T070228Z.wav_chan0.xml	0	0
01/11/2015 7:10	AMAR378.9.20151101T071028Z.wav_chan0.xml	0	0
01/11/2015 7:18	AMAR378.9.20151101T071828Z.wav_chan0.xml	0	0
01/11/2015 7:26	AMAR378.9.20151101T072628Z.wav_chan0.xml	0	0
01/11/2015 7:34	AMAR378.9.20151101T073428Z.wav_chan0.xml	0	0
01/11/2015 7:42	AMAR378.9.20151101T074228Z.wav_chan0.xml	0	0
01/11/2015 7:50	AMAR378.9.20151101T075028Z.wav_chan0.xml	0	0
01/11/2015 7:58	AMAR378.9.20151101T075828Z.wav_chan0.xml	0	0
01/11/2015 8:06	AMAR378.9.20151101T080628Z.wav_chan0.xml	0	0
01/11/2015 8:14	AMAR378.9.20151101T081428Z.wav_chan0.xml	0	0
01/11/2015 8:22	AMAR378.9.20151101T082228Z.wav_chan0.xml	0	0
01/11/2015 8:30	AMAR378.9.20151101T083028Z.wav_chan0.xml	0	0
01/11/2015 8:38	AMAR378.9.20151101T083828Z.wav_chan0.xml	0	0
01/11/2015 8:46	AMAR378.9.20151101T084628Z.wav_chan0.xml	0	0
01/11/2015 8:54	AMAR378.9.20151101T085428Z.wav_chan0.xml	0	0
01/11/2015 9:02	AMAR378.9.20151101T090228Z.wav_chan0.xml	0	0
01/11/2015 9:10	AMAR378.9.20151101T091028Z.wav_chan0.xml	0	0
01/11/2015 9:18	AMAR378.9.20151101T091828Z.wav_chan0.xml	0	0
01/11/2015 9:26	AMAR378.9.20151101T092628Z.wav_chan0.xml	0	0
01/11/2015 9:34	AMAR378.9.20151101T093428Z.wav_chan0.xml	0	0
01/11/2015 9:42	AMAR378.9.20151101T094228Z.wav_chan0.xml	0	0
01/11/2015 9:50	AMAR378.9.20151101T095028Z.wav_chan0.xml	0	0
01/11/2015 9:58	AMAR378.9.20151101T095828Z.wav_chan0.xml	0	0
01/11/2015 10:06	AMAR378.9.20151101T100628Z.wav_chan0.xml	0	0
01/11/2015 10:14	AMAR378.9.20151101T101428Z.wav_chan0.xml	0	0
01/11/2015 10:22	AMAR378.9.20151101T102228Z.wav_chan0.xml	0	0
01/11/2015 10:30	AMAR378.9.20151101T103028Z.wav_chan0.xml	0	0
01/11/2015 10:38	AMAR378.9.20151101T103828Z.wav_chan0.xml	0	0
01/11/2015 10:46	AMAR378.9.20151101T104628Z.wav_chan0.xml	0	0
01/11/2015 10:54	AMAR378.9.20151101T105428Z.wav_chan0.xml	0	0
01/11/2015 11:02	AMAR378.9.20151101T110228Z.wav_chan0.xml	0	0
01/11/2015 11:10	AMAR378.9.20151101T111028Z.wav_chan0.xml	0	0
01/11/2015 11:18	AMAR378.9.20151101T111828Z.wav_chan0.xml	0	0
01/11/2015 11:26	AMAR378.9.20151101T112628Z.wav_chan0.xml	0	0
01/11/2015 11:34	AMAR378.9.20151101T113428Z.wav_chan0.xml	0	0
01/11/2015 11:42	AMAR378.9.20151101T114228Z.wav_chan0.xml	0	0
01/11/2015 11:50	AMAR378.9.20151101T115028Z.wav_chan0.xml	0	0
01/11/2015 11:58	AMAR378.9.20151101T115828Z.wav_chan0.xml	0	0
01/11/2015 12:06	AMAR378.9.20151101T120628Z.wav_chan0.xml	0	0
01/11/2015 12:14	AMAR378.9.20151101T121428Z.wav_chan0.xml	0	0
01/11/2015 12:22	AMAR378.9.20151101T122228Z.wav_chan0.xml	0	0
01/11/2015 12:30	AMAR378.9.20151101T123028Z.wav_chan0.xml	0	0
01/11/2015 12:38	AMAR378.9.20151101T123828Z.wav_chan0.xml	0	0
01/11/2015 12:46	AMAR378.9.20151101T124628Z.wav_chan0.xml	0	0
01/11/2015 12:54	AMAR378.9.20151101T125428Z.wav_chan0.xml	0	0
01/11/2015 13:02	AMAR378.9.20151101T130228Z.wav_chan0.xml	0	0
01/11/2015 13:10	AMAR378.9.20151101T131028Z.wav_chan0.xml	0	0
01/11/2015 13:18	AMAR378.9.20151101T131828Z.wav_chan0.xml	0	0
01/11/2015 13:26	AMAR378.9.20151101T132628Z.wav_chan0.xml	0	0
01/11/2015 13:34	AMAR378.9.20151101T133428Z.wav_chan0.xml	0	0
01/11/2015 13:42	AMAR378.9.20151101T134228Z.wav_chan0.xml	0	0
01/11/2015 13:50	AMAR378.9.20151101T135028Z.wav_chan0.xml	0	0
01/11/2015 13:58	AMAR378.9.20151101T135828Z.wav_chan0.xml	0	0
01/11/2015 14:06	AMAR378.9.20151101T140628Z.wav_chan0.xml	0	0
01/11/2015 14:14	AMAR378.9.20151101T141428Z.wav_chan0.xml	0	0
01/11/2015 14:22	AMAR378.9.20151101T142228Z.wav_chan0.xml	0	0
01/11/2015 14:30	AMAR378.9.20151101T143028Z.wav_chan0.xml	0	0
01/11/2015 14:38	AMAR378.9.20151101T143828Z.wav_chan0.xml	0	0
01/11/2015 14:46	AMAR378.9.20151101T144628Z.wav_chan0.xml	0	0
01/11/2015 14:54	AMAR378.9.20151101T145428Z.wav_chan0.xml	0	0
01/11/2015 15:02	AMAR378.9.20151101T150228Z.wav_chan0.xml	0	0
01/11/2015 15:10	AMAR378.9.20151101T151028Z.wav_chan0.xml	0	0
01/11/2015 15:18	AMAR378.9.20151101T151828Z.wav_chan0.xml	0	0
01/11/2015 15:26	AMAR378.9.20151101T152628Z.wav_chan0.xml	0	0
01/11/2015 15:34	AMAR378.9.20151101T153428Z.wav_chan0.xml	0	0
01/11/2015 15:42	AMAR378.9.20151101T154228Z.wav_chan0.xml	0	0
01/11/2015 15:50	AMAR378.9.20151101T155028Z.wav_chan0.xml	0	0
01/11/2015 15:58	AMAR378.9.20151101T155828Z.wav_chan0.xml	0	0
01/11/2015 16:06	AMAR378.9.20151101T160628Z.wav_chan0.xml	0	0
01/11/2015 16:14	AMAR378.9.20151101T161428Z.wav_chan0.xml	0	0
01/11/2015 16:22	AMAR378.9.20151101T162228Z.wav_chan0.xml	0	0
01/11/2015 16:30	AMAR378.9.20151101T163028Z.wav_chan0.xml	0	0
01/11/2015 16:38	AMAR378.9.20151101T163828Z.wav_chan0.xml	0	0
01/11/2015 16:46	AMAR378.9.20151101T164628Z.wav_chan0.xml	0	0
01/11/2015 16:54	AMAR378.9.20151101T165428Z.wav_chan0.xml	0	0
01/11/2015 17:02	AMAR378.9.20151101T170228Z.wav_chan0.xml	0	0
01/11/2015 17:10	AMAR378.9.20151101T171028Z.wav_chan0.xml	0	0
01/11/2015 17:18	AMAR378.9.20151101T171828Z.wav_chan0.xml	0	0
01/11/2015 17:26	AMAR378.9.20151101T172628Z.wav_chan0.xml	0	0
01/11/2015 17:34	AMAR378.9.20151101T173428Z.wav_chan0.xml	0	0
01/11/2015 17:42	AMAR378.9.20151101T174228Z.wav_chan0.xml	0	0
01/11/2015 17:50	AMAR378.9.20151101T175028Z.wav_chan0.xml	0	0
01/11/2015 17:58	AMAR378.9.20151101T175828Z.wav_chan0.xml	0	0
01/11/2015 18:06	AMAR378.9.20151101T180628Z.wav_chan0.xml	0	0
01/11/2015 18:14	AMAR378.9.20151101T181428Z.wav_chan0.xml	0	0
01/11/2015 18:22	AMAR378.9.20151101T182228Z.wav_chan0.xml	0	0
01/11/2015 18:30	AMAR378.9.20151101T183028Z.wav_chan0.xml	0	0
01/11/2015 18:38	AMAR378.9.20151101T183828Z.wav_chan0.xml	0	0
01/11/2015 18:46	AMAR378.9.20151101T184628Z.wav_chan0.xml	0	0
01/11/2015 18:54	AMAR378.9.20151101T185428Z.wav_chan0.xml	0	0
01/11/2015 19:02	AMAR378.9.20151101T190228Z.wav_chan0.xml	0	0
01/11/2015 19:10	AMAR378.9.20151101T191028Z.wav_chan0.xml	0	0
01/11/2015 19:18	AMAR378.9.20151101T191828Z.wav_chan0.xml	0	0
01/11/2015 19:26	AMAR378.9.20151101T192628Z.wav_chan0.xml	0	0
01/11/2015 19:34	AMAR378.9.20151101T193428Z.wav_chan0.xml	0	0
01/11/2015 19:42	AMAR378.9.20151101T194228Z.wav_chan0.xml	0	0
01/11/2015 19:50	AMAR378.9.20151101T195028Z.wav_chan0.xml	0	0
01/11/2015 19:58	AMAR378.9.20151101T195828Z.wav_chan0.xml	0	0
01/11/2015 20:06	AMAR378.9.20151101T200628Z.wav_chan0.xml	0	0
01/11/2015 20:14	AMAR378.9.20151101T201428Z.wav_chan0.xml	0	0
01/11/2015 20:22	AMAR378.9.20151101T202228Z.wav_chan0.xml	0	0
01/11/2015 20:30	AMAR378.9.20151101T203028Z.wav_chan0.xml	0	0
01/11/2015 20:38	AMAR378.9.20151101T203828Z.wav_chan0.xml	0	0
01/11/2015 20:46	AMAR378.9.20151101T204628Z.wav_chan0.xml	0	0
01/11/2015 20:54	AMAR378.9.20151101T205428Z.wav_chan0.xml	0	0
01/11/2015 21:02	AMAR378.9.20151101T210228Z.wav_chan0.xml	0	0
01/11/2015 21:10	AMAR378.9.20151101T211028Z.wav_chan0.xml	0	0
01/11/2015 21:18	AMAR378.9.20151101T211828Z.wav_chan0.xml	0	0
01/11/2015 21:26	AMAR378.9.20151101T212628Z.wav_chan0.xml	0	0
01/11/2015 21:34	AMAR378.9.20151101T213428Z.wav_chan0.xml	0	0
01/11/2015 21:42	AMAR378.9.20151101T214228Z.wav_chan0.xml	0	0
01/11/2015 21:50	AMAR378.9.20151101T215028Z.wav_chan0.xml	0	0
01/11/2015 21:58	AMAR378.9.20151101T215828Z.wav_chan0.xml	0	0
01/11/2015 22:06	AMAR378.9.20151101T220628Z.wav_chan0.xml	0	0
01/11/2015 22:14	AMAR378.9.20151101T221428Z.wav_chan0.xml	0	0
01/11/2015 22:22	AMAR378.9.20151101T222228Z.wav_chan0.xml	0	0
01/11/2015 22:30	AMAR378.9.20151101T223028Z.wav_chan0.xml	0	0
01/11/2015 22:38	AMAR378.9.20151101T223828Z.wav_chan0.xml	0	0
01/11/2015 22:46	AMAR378.9.20151101T224628Z.wav_chan0.xml	0	0
01/11/2015 22:54	AMAR378.9.20151101T225428Z.wav_chan0.xml	0	0
01/11/2015 23:02	AMAR378.9.20151101T230228Z.wav_chan0.xml	0	0
01/11/2015 23:10	AMAR378.9.20151101T231028Z.wav_chan0.xml	0	0
01/11/2015 23:18	AMAR378.9.20151101T231828Z.wav_chan0.xml	0	0
01/11/2015 23:26	AMAR378.9.20151101T232628Z.wav_chan0.xml	0	0
01/11/2015 23:34	AMAR378.9.20151101T233428Z.wav_chan0.xml	0	0
01/11/2015 23:42	AMAR378.9.20151101T234228Z.wav_chan0.xml	0	0
01/11/2015 23:50	AMAR378.9.20151101T235028Z.wav_chan0.xml	0	0
01/11/2015 23:58	AMAR378.9.20151101T235828Z.wav_chan0.xml	0	0
01/10/2015 0:06	AMAR378.9.20151001T000628Z.wav_chan0.xml	0	0
01/10/2015 0:14	AMAR378.9.20151001T001428Z.wav_chan0.xml	0	0
01/10/2015 0:22	AMAR378.9.20151001T002228Z.wav_chan0.xml	0	0
01/10/2015 0:30	AMAR378.9.20151001T003028Z.wav_chan0.xml	0	0
01/10/2015 0:38	AMAR378.9.20151001T003828Z.wav_chan0.xml	0	0
01/10/2015 0:46	AMAR378.9.20151001T004628Z.wav_chan0.xml	0	0
01/10/2015 0:54	AMAR378.9.20151001T005428Z.wav_chan0.xml	0	0
01/10/2015 1:02	AMAR378.9.20151001T010228Z.wav_chan0.xml	0	0
01/10/2015 1:10	AMAR378.9.20151001T011028Z.wav_chan0.xml	0	0
01/10/2015 1:18	AMAR378.9.20151001T011828Z.wav_chan0.xml	0	0
01/10/2015 1:26	AMAR378.9.20151001T012628Z.wav_chan0.xml	0	0
01/10/2015 1:34	AMAR378.9.20151001T013428Z.wav_chan0.xml	0	0
01/10/2015 1:42	AMAR378.9.20151001T014228Z.wav_chan0.xml	0	0
01/10/2015 1:50	AMAR378.9.20151001T015028Z.wav_chan0.xml	0	0
01/10/2015 1:58	AMAR378.9.20151001T015828Z.wav_chan0.xml	0	0
01/10/2015 2:06	AMAR378.9.20151001T020628Z.wav_chan0.xml	0	0
01/10/2015 2:14	AMAR378.9.20151001T021428Z.wav_chan0.xml	0	0
01/10/2015 2:22	AMAR378.9.20151001T022228Z.wav_chan0.xml	0	0
01/10/2015 2:30	AMAR378.9.20151001T023028Z.wav_chan0.xml	0	0
01/10/2015 2:38	AMAR378.9.20151001T023828Z.wav_chan0.xml	0	0
01/10/2015 2:46	AMAR378.9.20151001T024628Z.wav_chan0.xml	0	0
01/10/2015 2:54	AMAR378.9.20151001T025428Z.wav_chan0.xml	0	0
01/10/2015 3:02	AMAR378.9.20151001T030228Z.wav_chan0.xml	0	0
01/10/2015 3:10	AMAR378.9.20151001T031028Z.wav_chan0.xml	0	0
01/10/2015 3:18	AMAR378.9.20151001T031828Z.wav_chan0.xml	0	0
01/10/2015 3:26	AMAR378.9.20151001T032628Z.wav_chan0.xml	0	0
01/10/2015 3:34	AMAR378.9.20151001T033428Z.wav_chan0.xml	0	0
01/10/2015 3:42	AMAR378.9.20151001T034228Z.wav_chan0.xml	0	0
01/10/2015 3:50	AMAR378.9.20151001T035028Z.wav_chan0.xml	0	0
01/10/2015 3:58	AMAR378.9.20151001T035828Z.wav_chan0.xml	0	0
01/10/2015 4:06	AMAR378.9.20151001T040628Z.wav_chan0.xml	0	0
01/10/2015 4:14	AMAR378.9.20151001T041428Z.wav_chan0.xml	0	0
01/10/2015 4:22	AMAR378.9.20151001T042228Z.wav_chan0.xml	0	0
01/10/2015 4:30	AMAR378.9.20151001T043028Z.wav_chan0.xml	0	0
01/10/2015 4:38	AMAR378.9.20151001T043828Z.wav_chan0.xml	0	0
01/10/2015 4:46	AMAR378.9.20151001T044628Z.wav_chan0.xml	0	0
01/10/2015 4:54	AMAR378.9.20151001T045428Z.wav_chan0.xml	0	0
01/10/2015 5:02	AMAR378.9.20151001T050228Z.wav_chan0.xml	0	0
01/10/2015 5:10	AMAR378.9.20151001T051028Z.wav_chan0.xml	0	0
01/10/2015 5:18	AMAR378.9.20151001T051828Z.wav_chan0.xml	0	0
01/10/2015 5:26	AMAR378.9.20151001T052628Z.wav_chan0.xml	0	0
01/10/2015 5:34	AMAR378.9.20151001T053428Z.wav_chan0.xml	0	0
01/10/2015 5:42	AMAR378.9.20151001T054228Z.wav_chan0.xml	0	0
01/10/2015 5:50	AMAR378.9.20151001T055028Z.wav_chan0.xml	0	0
01/10/2015 5:58	AMAR378.9.20151001T055828Z.wav_chan0.xml	0	0
01/10/2015 6:06	AMAR378.9.20151001T060628Z.wav_chan0.xml	0	0
01/10/2015 6:14	AMAR378.9.20151001T061428Z.wav_chan0.xml	0	0
01/10/2015 6:22	AMAR378.9.20151001T062228Z.wav_chan0.xml	0	0
01/10/2015 6:30	AMAR378.9.20151001T063028Z.wav_chan0.xml	0	0
01/10/2015 6:38	AMAR378.9.20151001T063828Z.wav_chan0.xml	0	0
01/10/2015 6:46	AMAR378.9.20151001T064628Z.wav_chan0.xml	0	0
01/10/2015 6:54	AMAR378.9.20151001T065428Z.wav_chan0.xml	0	0
01/10/2015 7:02	AMAR378.9.20151001T070228Z.wav_chan0.xml	0	0
01/10/2015 7:10	AMAR378.9.20151001T071028Z.wav_chan0.xml	0	0
01/10/2015 7:18	AMAR378.9.20151001T071828Z.wav_chan0.xml	0	0
01/10/2015 7:26	AMAR378.9.20151001T072628Z.wav_chan0.xml	0	0
01/10/2015 7:34	AMAR378.9.20151001T073428Z.wav_chan0.xml	0	0
01/10/2015 7:42	AMAR378.9.20151001T074228Z.wav_chan0.xml	0	0
01/10/2015 7:50	AMAR378.9.20151001T075028Z.wav_chan0.xml	0	0
01/10/2015 7:58	AMAR378.9.20151001T075828Z.wav_chan0.xml	0	0
01/10/2015 8:06	AMAR378.9.20151001T080628Z.wav_chan0.xml	0	0
01/10/2015 8:14	AMAR378.9.20151001T081428Z.wav_chan0.xml	0	0
01/10/2015 8:22	AMAR378.9.20151001T082228Z.wav_chan0.xml	0	0
01/10/2015 8:30	AMAR378.9.20151001T083028Z.wav_chan0.xml	0	0
01/10/2015 8:38	AMAR378.9.20151001T083828Z.wav_chan0.xml	0	0
01/10/2015 8:46	AMAR378.9.20151001T084628Z.wav_chan0.xml	0	0
01/10/2015 8:54	AMAR378.9.20151001T085428Z.wav_chan0.xml	0	0
01/10/2015 9:02	AMAR378.9.20151001T090228Z.wav_chan0.xml	0	0
01/10/2015 9:10	AMAR378.9.20151001T091028Z.wav_chan0.xml	0	0
01/10/2015 9:18	AMAR378.9.20151001T091828Z.wav_chan0.xml	0	0
01/10/2015 9:26	AMAR378.9.20151001T092628Z.wav_chan0.xml	0	0
01/10/2015 9:34	AMAR378.9.20151001T093428Z.wav_chan0.xml	0	0
01/10/2015 9:42	AMAR378.9.20151001T094228Z.wav_chan0.xml	0	0
01/10/2015 9:50	AMAR378.9.20151001T095028Z.wav_chan0.xml	0	0
01/10/2015 9:58	AMAR378.9.20151001T095828Z.wav_chan0.xml	0	0
01/10/2015 10:06	AMAR378.9.20151001T100628Z.wav_chan0.xml	0	0
01/10/2015 10:14	AMAR378.9.20151001T101428Z.wav_chan0.xml	0	0
01/10/2015 10:22	AMAR378.9.20151001T102228Z.wav_chan0.xml	0	0
01/10/2015 10:30	AMAR378.9.20151001T103028Z.wav_chan0.xml	0	0
01/10/2015 10:38	AMAR378.9.20151001T103828Z.wav_chan0.xml	0	0
01/10/2015 10:46	AMAR378.9.20151001T104628Z.wav_chan0.xml	0	0
01/10/2015 10:54	AMAR378.9.20151001T105428Z.wav_chan0.xml	0	0
01/10/2015 11:02	AMAR378.9.20151001T110228Z.wav_chan0.xml	0	0
01/10/2015 11:10	AMAR378.9.20151001T111028Z.wav_chan0.xml	0	0
01/10/2015 11:18	AMAR378.9.20151001T111828Z.wav_chan0.xml	0	0
01/10/2015 11:26	AMAR378.9.20151001T112628Z.wav_chan0.xml	0	0
01/10/2015 11:34	AMAR378.9.20151001T113428Z.wav_chan0.xml	0	0
01/10/2015 11:42	AMAR378.9.20151001T114228Z.wav_chan0.xml	0	0
01/10/2015 11:50	AMAR378.9.20151001T115028Z.wav_chan0.xml	0	0
01/10/2015 11:58	AMAR378.9.20151001T115828Z.wav_chan0.xml	0	0
01/10/2015 12:06	AMAR378.9.20151001T120628Z.wav_chan0.xml	0	0
01/10/2015 12:14	AMAR378.9.20151001T121428Z.wav_chan0.xml	0	0
01/10/2015 12:22	AMAR378.9.20151001T122228Z.wav_chan0.xml	0	0
01/10/2015 12:30	AMAR378.9.20151001T123028Z.wav_chan0.xml	0	0
01/10/2015 12:38	AMAR378.9.20151001T123828Z.wav_chan0.xml	0	0
01/10/2015 12:46	AMAR378.9.20151001T124628Z.wav_chan0.xml	0	0
01/10/2015 12:54	AMAR378.9.20151001T125428Z.wav_chan0.xml	0	0
01/10/2015 13:02	AMAR378.9.20151001T130228Z.wav_chan0.xml	0	0
01/10/2015 13:10	AMAR378.9.20151001T131028Z.wav_chan0.xml	0	0
01/10/2015 13:18	AMAR378.9.20151001T131828Z.wav_chan0.xml	0	0
01/10/2015 13:26	AMAR378.9.20151001T132628Z.wav_chan0.xml	0	0
01/10/2015 13:34	AMAR378.9.20151001T133428Z.wav_chan0.xml	0	0
01/10/2015 13:42	AMAR378.9.20151001T134228Z.wav_chan0.xml	0	0
01/10/2015 13:50	AMAR378.9.20151001T135028Z.wav_chan0.xml	0	0
01/10/2015 13:58	AMAR378.9.20151001T135828Z.wav_chan0.xml	0	0
01/10/2015 14:06	AMAR378.9.20151001T140628Z.wav_chan0.xml	0	0
01/10/2015 14:14	AMAR378.9.20151001T141428Z.wav_chan0.xml	0	0
01/10/2015 14:22	AMAR378.9.20151001T142228Z.wav_chan0.xml	0	0
01/10/2015 14:30	AMAR378.9.20151001T143028Z.wav_chan0.xml	0	0
01/10/2015 14:38	AMAR378.9.20151001T143828Z.wav_chan0.xml	0	0
01/10/2015 14:46	AMAR378.9.20151001T144628Z.wav_chan0.xml	0	0
01/10/2015 14:54	AMAR378.9.20151001T145428Z.wav_chan0.xml	0	0
01/10/2015 15:02	AMAR378.9.20151001T150228Z.wav_chan0.xml	0	0
01/10/2015 15:10	AMAR378.9.20151001T151028Z.wav_chan0.xml	0	0
01/10/2015 15:18	AMAR378.9.20151001T151828Z.wav_chan0.xml	0	0
01/10/2015 15:26	AMAR378.9.20151001T152628Z.wav_chan0.xml	0	0
01/10/2015 15:34	AMAR378.9.20151001T153428Z.wav_chan0.xml	0	0
01/10/2015 15:42	AMAR378.9.20151001T154228Z.wav_chan0.xml	0	0
01/10/2015 15:50	AMAR378.9.20151001T155028Z.wav_chan0.xml	0	0
01/10/2015 15:58	AMAR378.9.20151001T155828Z.wav_chan0.xml	0	0
01/10/2015 16:06	AMAR378.9.20151001T160628Z.wav_chan0.xml	0	0
01/10/2015 16:14	AMAR378.9.20151001T161428Z.wav_chan0.xml	0	0
01/10/2015 16:22	AMAR378.9.20151001T162228Z.wav_chan0.xml	0	0
01/10/2015 16:30	AMAR378.9.20151001T163028Z.wav_chan0.xml	0	0
01/10/2015 16:38	AMAR378.9.20151001T163828Z.wav_chan0.xml	0	0
01/10/2015 16:46	AMAR378.9.20151001T164628Z.wav_chan0.xml	0	0
01/10/2015 16:54	AMAR378.9.20151001T165428Z.wav_chan0.xml	0	0
01/10/2015 17:02	AMAR378.9.20151001T170228Z.wav_chan0.xml	0	0
01/10/2015 17:10	AMAR378.9.20151001T171028Z.wav_chan0.xml	0	0
01/10/2015 17:18	AMAR378.9.20151001T171828Z.wav_chan0.xml	0	0
01/10/2015 17:26	AMAR378.9.20151001T172628Z.wav_chan0.xml	0	0
01/10/2015 17:34	AMAR378.9.20151001T173428Z.wav_chan0.xml	0	0
01/10/2015 17:42	AMAR378.9.20151001T174228Z.wav_chan0.xml	0	0
01/10/2015 17:50	AMAR378.9.20151001T175028Z.wav_chan0.xml	0	0
01/10/2015 17:58	AMAR378.9.20151001T175828Z.wav_chan0.xml	0	0
01/10/2015 18:06	AMAR378.9.20151001T180628Z.wav_chan0.xml	0	0
01/10/2015 18:14	AMAR378.9.20151001T181428Z.wav_chan0.xml	0	0
01/10/2015 18:22	AMAR378.9.20151001T182228Z.wav_chan0.xml	0	0
01/10/2015 18:30	AMAR378.9.20151001T183028Z.wav_chan0.xml	0	0
01/10/2015 18:38	AMAR378.9.20151001T183828Z.wav_chan0.xml	0	0
01/10/2015 18:46	AMAR378.9.20151001T184628Z.wav_chan0.xml	0	0
01/10/2015 18:54	AMAR378.9.20151001T185428Z.wav_chan0.xml	0	0
01/10/2015 19:02	AMAR378.9.20151001T190228Z.wav_chan0.xml	0	0
01/10/2015 19:10	AMAR378.9.20151001T191028Z.wav_chan0.xml	0	0
01/10/2015 19:18	AMAR378.9.20151001T191828Z.wav_chan0.xml	0	0
01/10/2015 19:26	AMAR378.9.20151001T192628Z.wav_chan0.xml	0	0
01/10/2015 19:34	AMAR378.9.20151001T193428Z.wav_chan0.xml	0	0
01/10/2015 19:42	AMAR378.9.20151001T194228Z.wav_chan0.xml	0	0
01/10/2015 19:50	AMAR378.9.20151001T195028Z.wav_chan0.xml	0	0
01/10/2015 19:58	AMAR378.9.20151001T195828Z.wav_chan0.xml	0	0
01/10/2015 20:06	AMAR378.9.20151001T200628Z.wav_chan0.xml	0	0
01/10/2015 20:14	AMAR378.9.20151001T201428Z.wav_chan0.xml	0	0
01/10/2015 20:22	AMAR378.9.20151001T202228Z.wav_chan0.xml	0	0
01/10/2015 20:30	AMAR378.9.20151001T203028Z.wav_chan0.xml	0	0
01/10/2015 20:38	AMAR378.9.20151001T203828Z.wav_chan0.xml	0	0
01/10/2015 20:46	AMAR378.9.20151001T204628Z.wav_chan0.xml	0	0
01/10/2015 20:54	AMAR378.9.20151001T205428Z.wav_chan0.xml	0	0
01/10/2015 21:02	AMAR378.9.20151001T210228Z.wav_chan0.xml	0	0
01/10/2015 21:10	AMAR378.9.20151001T211028Z.wav_chan0.xml	0	0
01/10/2015 21:18	AMAR378.9.20151001T211828Z.wav_chan0.xml	0	0
01/10/2015 21:26	AMAR378.9.20151001T212628Z.wav_chan0.xml	0	0
01/10/2015 21:34	AMAR378.9.20151001T213428Z.wav_chan0.xml	0	0
01/10/2015 21:42	AMAR378.9.20151001T214228Z.wav_chan0.xml	0	0
01/10/2015 21:50	AMAR378.9.20151001T215028Z.wav_chan0.xml	0	0
01/10/2015 21:58	AMAR378.9.20151001T215828Z.wav_chan0.xml	0	0
01/10/2015 22:06	AMAR378.9.20151001T220628Z.wav_chan0.xml	0	0
01/10/2015 22:14	AMAR378.9.20151001T221428Z.wav_chan0.xml	0	0
01/10/2015 22:22	AMAR378.9.20151001T222228Z.wav_chan0.xml	0	0
01/10/2015 22:30	AMAR378.9.20151001T223028Z.wav_chan0.xml	0	0
01/10/2015 22:38	AMAR378.9.20151001T223828Z.wav_chan0.xml	0	0
01/10/2015 22:46	AMAR378.9.20151001T224628Z.wav_chan0.xml	0	0
01/10/2015 22:54	AMAR378.9.20151001T225428Z.wav_chan0.xml	0	0
01/10/2015 23:02	AMAR378.9.20151001T230228Z.wav_chan0.xml	0	0
01/10/2015 23:10	AMAR378.9.20151001T231028Z.wav_chan0.xml	0	0
01/10/2015 23:18	AMAR378.9.20151001T231828Z.wav_chan0.xml	0	0
01/10/2015 23:26	AMAR378.9.20151001T232628Z.wav_chan0.xml	0	0
01/10/2015 23:34	AMAR378.9.20151001T233428Z.wav_chan0.xml	0	0
01/10/2015 23:42	AMAR378.9.20151001T234228Z.wav_chan0.xml	0	0
01/10/2015 23:50	AMAR378.9.20151001T235028Z.wav_chan0.xml	0	0
01/10/2015 23:58	AMAR378.9.20151001T235828Z.wav_chan0.xml	0	0
01/09/2015 0:06	AMAR378.9.20150901T000628Z.wav_chan0.xml	0	0
01/09/2015 0:14	AMAR378.9.20150901T001428Z.wav_chan0.xml	0	0
01/09/2015 0:22	AMAR378.9.20150901T002228Z.wav_chan0.xml	0	0
01/09/2015 0:30	AMAR378.9.20150901T003028Z.wav_chan0.xml	0	0
01/09/2015 0:38	AMAR378.9.20150901T003828Z.wav_chan0.xml	0	0
01/09/2015 0:46	AMAR378.9.20150901T004628Z.wav_chan0.xml	0	0
01/09/2015 0:54	AMAR378.9.20150901T005428Z.wav_chan0.xml	0	0
01/09/2015 1:02	AMAR378.9.20150901T010228Z.wav_chan0.xml	0	0
01/09/2015 1:10	AMAR378.9.20150901T011028Z.wav_chan0.xml	0	0
01/09/2015 1:18	AMAR378.9.20150901T011828Z.wav_chan0.xml	0	0
01/09/2015 1:26	AMAR378.9.20150901T012628Z.wav_chan0.xml	0	0
01/09/2015 1:34	AMAR378.9.20150901T013428Z.wav_chan0.xml	0	0
01/09/2015 1:42	AMAR378.9.20150901T014228Z.wav_chan0.xml	0	0
01/09/2015 1:50	AMAR378.9.20150901T015028Z.wav_chan0.xml	0	0
01/09/2015 1:58	AMAR378.9.20150901T015828Z.wav_chan0.xml	0	0
01/09/2015 2:06	AMAR378.9.20150901T020628Z.wav_chan0.xml	0	0
01/09/2015 2:14	AMAR378.9.20150901T021428Z.wav_chan0.xml	0	0
01/09/2015 2:22	AMAR378.9.20150901T022228Z.wav_chan0.xml	0	0
01/09/2015 2:30	AMAR378.9.20150901T023028Z.wav_chan0.xml	0	0
01/09/2015 2:38	AMAR378.9.20150901T023828Z.wav_chan0.xml	0	0
01/09/2015 2:46	AMAR378.9.20150901T024628Z.wav_chan0.xml	0	0
01/09/2015 2:54	AMAR378.9.20150901T025428Z.wav_chan0.xml	0	0
01/09/2015 3:02	AMAR378.9.20150901T030228Z.wav_chan0.xml	0	0
01/09/2015 3:10	AMAR378.9.20150901T031028Z.wav_chan0.xml	0	0
01/09/2015 3:18	AMAR378.9.20150901T031828Z.wav_chan0.xml	0	0
01/09/2015 3:26	AMAR378.9.20150901T032628Z.wav_chan0.xml	0	0
01/09/2015 3:34	AMAR378.9.20150901T033428Z.wav_chan0.xml	0	0
01/09/2015 3:42	AMAR378.9.20150901T034228Z.wav_chan0.xml	0	0
01/09/2015 3:50	AMAR378.9.20150901T035028Z.wav_chan0.xml	0	0
01/09/2015 3:58	AMAR378.9.20150901T035828Z.wav_chan0.xml	0	0
01/09/2015 4:06	AMAR378.9.20150901T040628Z.wav_chan0.xml	0	0
01/09/2015 4:14	AMAR378.9.20150901T041428Z.wav_chan0.xml	0	0
01/09/2015 4:22	AMAR378.9.20150901T042228Z.wav_chan0.xml	0	0
01/09/2015 4:30	AMAR378.9.20150901T043028Z.wav_chan0.xml	0	0
01/09/2015 4:38	AMAR378.9.20150901T043828Z.wav_chan0.xml	0	0
01/09/2015 4:46	AMAR378.9.20150901T044628Z.wav_chan0.xml	0	0
01/09/2015 4:54	AMAR378.9.20150901T045428Z.wav_chan0.xml	0	0
01/09/2015 5:02	AMAR378.9.20150901T050228Z.wav_chan0.xml	0	0
01/09/2015 5:10	AMAR378.9.20150901T051028Z.wav_chan0.xml	0	0
01/09/2015 5:18	AMAR378.9.20150901T051828Z.wav_chan0.xml	0	0
01/09/2015 5:26	AMAR378.9.20150901T052628Z.wav_chan0.xml	0	0
01/09/2015 5:34	AMAR378.9.20150901T053428Z.wav_chan0.xml	0	0
01/09/2015 5:42	AMAR378.9.20150901T054228Z.wav_chan0.xml	0	0
01/09/2015 5:50	AMAR378.9.20150901T055028Z.wav_chan0.xml	0	0
01/09/2015 5:58	AMAR378.9.20150901T055828Z.wav_chan0.xml	0	0
01/09/2015 6:06	AMAR378.9.20150901T060628Z.wav_chan0.xml	0	0
01/09/2015 6:14	AMAR378.9.20150901T061428Z.wav_chan0.xml	0	0
01/09/2015 6:22	AMAR378.9.20150901T062228Z.wav_chan0.xml	0	0
01/09/2015 6:30	AMAR378.9.20150901T063028Z.wav_chan0.xml	0	0
01/09/2015 6:38	AMAR378.9.20150901T063828Z.wav_chan0.xml	0	0
01/09/2015 6:46	AMAR378.9.20150901T064628Z.wav_chan0.xml	0	0
01/09/2015 6:54	AMAR378.9.20150901T065428Z.wav_chan0.xml	0	0
01/09/2015 7:02	AMAR378.9.20150901T070228Z.wav_chan0.xml	0	0
01/09/2015 7:10	AMAR378.9.20150901T071028Z.wav_chan0.xml	0	0
01/09/2015 7:18	AMAR378.9.20150901T071828Z.wav_chan0.xml	0	0
01/09/2015 7:26	AMAR378.9.20150901T072628Z.wav_chan0.xml	0	0
01/09/2015 7:34	AMAR378.9.20150901T073428Z.wav_chan0.xml	0	0
01/09/2015 7:42	AMAR378.9.20150901T074228Z.wav_chan0.xml	0	0
01/09/2015 7:50	AMAR378.9.20150901T075028Z.wav_chan0.xml	0	0
01/09/2015 7:58	AMAR378.9.20150901T075828Z.wav_chan0.xml	0	0
01/09/2015 8:06	AMAR378.9.20150901T080628Z.wav_chan0.xml	0	0
01/09/2015 8:14	AMAR378.9.20150901T081428Z.wav_chan0.xml	0	0
01/09/2015 8:22	AMAR378.9.20150901T082228Z.wav_chan0.xml	0	0
01/09/2015 8:30	AMAR378.9.20150901T083028Z.wav_chan0.xml	0	0
01/09/2015 8:38	AMAR378.9.20150901T083828Z.wav_chan0.xml	0	0
01/09/2015 8:46	AMAR378.9.20150901T084628Z.wav_chan0.xml	0	0
01/09/2015 8:54	AMAR378.9.20150901T085428Z.wav_chan0.xml	0	0
01/09/2015 9:02	AMAR378.9.20150901T090228Z.wav_chan0.xml	0	0
01/09/2015 9:10	AMAR378.9.20150901T091028Z.wav_chan0.xml	0	0
01/09/2015 9:18	AMAR378.9.20150901T091828Z.wav_chan0.xml	0	0
01/09/2015 9:26	AMAR378.9.20150901T092628Z.wav_chan0.xml	0	0
01/09/2015 9:34	AMAR378.9.20150901T093428Z.wav_chan0.xml	0	0
01/09/2015 9:42	AMAR378.9.20150901T094228Z.wav_chan0.xml	0	0
01/09/2015 9:50	AMAR378.9.20150901T095028Z.wav_chan0.xml	0	0
01/09/2015 9:58	AMAR378.9.20150901T095828Z.wav_chan0.xml	0	0
01/09/2015 10:06	AMAR378.9.20150901T100628Z.wav_chan0.xml	0	0
01/09/2015 10:14	AMAR378.9.20150901T101428Z.wav_chan0.xml	0	0
01/09/2015 10:22	AMAR378.9.20150901T102228Z.wav_chan0.xml	0	0
01/09/2015 10:30	AMAR378.9.20150901T103028Z.wav_chan0.xml	0	0
01/09/2015 10:38	AMAR378.9.20150901T103828Z.wav_chan0.xml	0	0
01/09/2015 10:46	AMAR378.9.20150901T104628Z.wav_chan0.xml	0	0
01/09/2015 10:54	AMAR378.9.20150901T105428Z.wav_chan0.xml	0	0
01/09/2015 11:02	AMAR378.9.20150901T110228Z.wav_chan0.xml	0	0
01/09/2015 11:10	AMAR378.9.20150901T111028Z.wav_chan0.xml	0	0
01/09/2015 11:18	AMAR378.9.20150901T111828Z.wav_chan0.xml	0	0
01/09/2015 11:26	AMAR378.9.20150901T112628Z.wav_chan0.xml	0	0
01/09/2015 11:34	AMAR378.9.20150901T113428Z.wav_chan0.xml	0	0
01/09/2015 11:42	AMAR378.9.20150901T114228Z.wav_chan0.xml	0	0
01/09/2015 11:50	AMAR378.9.20150901T115028Z.wav_chan0.xml	0	0
01/09/2015 11:58	AMAR378.9.20150901T115828Z.wav_chan0.xml	0	0
01/09/2015 12:06	AMAR378.9.20150901T120628Z.wav_chan0.xml	0	0
01/09/2015 12:14	AMAR378.9.20150901T121428Z.wav_chan0.xml	0	0
01/09/2015 12:22	AMAR378.9.20150901T122228Z.wav_chan0.xml	0	0
01/09/2015 12:30	AMAR378.9.20150901T123028Z.wav_chan0.xml	0	0
01/09/2015 12:38	AMAR378.9.20150901T123828Z.wav_chan0.xml	0	0
01/09/2015 12:46	AMAR378.9.20150901T124628Z.wav_chan0.xml	0	0
01/09/2015 12:54	AMAR378.9.20150901T125428Z.wav_chan0.xml	0	0
01/09/2015 13:02	AMAR378.9.20150901T130228Z.wav_chan0.xml	0	0
01/09/2015 13:10	AMAR378.9.20150901T131028Z.wav_chan0.xml	0	0
01/09/2015 13:18	AMAR378.9.20150901T131828Z.wav_chan0.xml	0	0
01/09/2015 13:26	AMAR378.9.20150901T132628Z.wav_chan0.xml	0	0
01/09/2015 13:34	AMAR378.9.20150901T133428Z.wav_chan0.xml	0	0
01/09/2015 13:42	AMAR378.9.20150901T134228Z.wav_chan0.xml	0	0
01/09/2015 13:50	AMAR378.9.20150901T135028Z.wav_chan0.xml	0	0
01/09/2015 13:58	AMAR378.9.20150901T135828Z.wav_chan0.xml	0	0
01/09/2015 14:06	AMAR378.9.20150901T140628Z.wav_chan0.xml	0	0
01/09/2015 14:14	AMAR378.9.20150901T141428Z.wav_chan0.xml	0	0
01/09/2015 14:22	AMAR378.9.20150901T142228Z.wav_chan0.xml	0	0
01/09/2015 14:30	AMAR378.9.20150901T143028Z.wav_chan0.xml	0	0
01/09/2015 14:38	AMAR378.9.20150901T143828Z.wav_chan0.xml	0	0
01/09/2015 14:46	AMAR378.9.20150901T144628Z.wav_chan0.xml	0	0
01/09/2015 14:54	AMAR378.9.20150901T145428Z.wav_chan0.xml	0	0
01/09/2015 15:02	AMAR378.9.20150901T150228Z.wav_chan0.xml	0	0
01/09/2015 15:10	AMAR378.9.20150901T151028Z.wav_chan0.xml	0	0
01/09/2015 15:18	AMAR378.9.20150901T151828Z.wav_chan0.xml	0	0
01/09/2015 15:26	AMAR378.9.20150901T152628Z.wav_chan0.xml	0	0
01/09/2015 15:34	AMAR378.9.20150901T153428Z.wav_chan0.xml	0	0
01/09/2015 15:42	AMAR378.9.20150901T154228Z.wav_chan0.xml	0	0
01/09/2015 15:50	AMAR378.9.20150901T155028Z.wav_chan0.xml	0	0
01/09/2015 15:58	AMAR378.9.20150901T155828Z.wav_chan0.xml	0	0
01/09/2015 16:06	AMAR378.9.20150901T160628Z.wav_chan0.xml	0	0
01/09/2015 16:14	AMAR378.9.20150901T161428Z.wav_chan0.xml	0	0
01/09/2015 16:22	AMAR378.9.20150901T162228Z.wav_chan0.xml	0	0
01/09/2015 16:30	AMAR378.9.20150901T163028Z.wav_chan0.xml	0	0
01/09/2015 16:38	AMAR378.9.20150901T163828Z.wav_chan0.xml	0	0
01/09/2015 16:46	AMAR378.9.20150901T164628Z.wav_chan0.xml	0	0
01/09/2015 16:54	AMAR378.9.20150901T165428Z.wav_chan0.xml	0	0
01/09/2015 17:02	AMAR378.9.20150901T170228Z.wav_chan0.xml	0	0
01/09/2015 17:10	AMAR378.9.20150901T171028Z.wav_chan0.xml	0	0
01/09/2015 17:18	AMAR378.9.20150901T171828Z.wav_chan0.xml	0	0
01/09/2015 17:26	AMAR378.9.20150901T172628Z.wav_chan0.xml	0	0
01/09/2015 17:34	AMAR378.9.20150901T173428Z.wav_chan0.xml	0	0
01/09/2015 17:42	AMAR378.9.20150901T174228Z.wav_chan0.xml	0	0
01/09/2015 17:50	AMAR378.9.20150901T175028Z.wav_chan0.xml	0	0
01/09/2015 17:58	AMAR378.9.20150901T175828Z.wav_chan0.xml	0	0
01/09/2015 18:06	AMAR378.9.20150901T180628Z.wav_chan0.xml	0	0
01/09/2015 18:14	AMAR378.9.20150901T181428Z.wav_chan0.xml	0	0
01/09/2015 18:22	AMAR378.9.20150901T182228Z.wav_chan0.xml	0	0
01/09/2015 18:30	AMAR378.9.20150901T183028Z.wav_chan0.xml	0	0
01/09/2015 18:38	AMAR378.9.20150901T183828Z.wav_chan0.xml	0	0
01/09/2015 18:46	AMAR378.9.20150901T184628Z.wav_chan0.xml	0	0
01/09/2015 18:54	AMAR378.9.20150901T185428Z.wav_chan0.xml	0	0
01/09/2015 19:02	AMAR378.9.20150901T190228Z.wav_chan0.xml	0	0
01/09/2015 19:10	AMAR378.9.20150901T191028Z.wav_chan0.xml	0	0
01/09/2015 19:18	AMAR378.9.20150901T191828Z.wav_chan0.xml	0	0
01/09/2015 19:26	AMAR378.9.20150901T192628Z.wav_chan0.xml	0	0
01/09/2015 19:34	AMAR378.9.20150901T193428Z.wav_chan0.xml	0	0
01/09/2015 19:42	AMAR378.9.20150901T194228Z.wav_chan0.xml	0	0
01/09/2015 19:50	AMAR378.9.20150901T195028Z.wav_chan0.xml	0	0
01/09/2015 19:58	AMAR378.9.20150901T195828Z.wav_chan0.xml	0	0
01/09/2015 20:06	AMAR378.9.20150901T200628Z.wav_chan0.xml	0	0
01/09/2015 20:14	AMAR378.9.20150901T201428Z.wav_chan0.xml	0	0
01/09/2015 20:22	AMAR378.9.20150901T202228Z.wav_chan0.xml	0	0
01/09/2015 20:30	AMAR378.9.20150901T203028Z.wav_chan0.xml	0	0
01/09/2015 20:38	AMAR378.9.20150901T203828Z.wav_chan0.xml	0	0
01/09/2015 20:46	AMAR378.9.20150901T204628Z.wav_chan0.xml	0	0
01/09/2015 20:54	AMAR378.9.20150901T205428Z.wav_chan0.xml	0	0
01/09/2015 21:02	AMAR378.9.20150901T210228Z.wav_chan0.xml	0	0
01/09/2015 21:10	AMAR378.9.20150901T211028Z.wav_chan0.xml	0	0
01/09/2015 21:18	AMAR378.9.20150901T211828Z.wav_chan0.xml	0	0
01/09/2015 21:26	AMAR378.9.20150901T212628Z.wav_chan0.xml	0	0
01/09/2015 21:34	AMAR378.9.20150901T213428Z.wav_chan0.xml	0	0
01/09/2015 21:42	AMAR378.9.20150901T214228Z.wav_chan0.xml	0	0
01/09/2015 21:50	AMAR378.9.20150901T215028Z.wav_chan0.xml	0	0
01/09/2015 21:58	AMAR378.9.20150901T215828Z.wav_chan0.xml	0	0
01/09/2015 22:06	AMAR378.9.20150901T220628Z.wav_chan0.xml	0	0
01/09/2015 22:14	AMAR378.9.20150901T221428Z.wav_chan0.xml	0	0
01/09/2015 22:22	AMAR378.9.20150901T222228Z.wav_chan0.xml	0	0
01/09/2015 22:30	AMAR378.9.20150901T223028Z.wav_chan0.xml	0	0
01/09/2015 22:38	AMAR378.9.20150901T223828Z.wav_chan0.xml	0	0
01/09/2015 22:46	AMAR378.9.20150901T224628Z.wav_chan0.xml	0	0
01/09/2015 22:54	AMAR378.9.20150901T225428Z.wav_chan0.xml	0	0
01/09/2015 23:02	AMAR378.9.20150901T230228Z.wav_chan0.xml	0	0
01/09/2015 23:10	AMAR378.9.20150901T231028Z.wav_chan0.xml	0	0
01/09/2015 23:18	AMAR378.9.20150901T231828Z.wav_chan0.xml	0	0
01/09/2015 23:26	AMAR378.9.20150901T232628Z.wav_chan0.xml	0	0
01/09/2015 23:34	AMAR378.9.20150901T233428Z.wav_chan0.xml	0	0
01/09/2015 23:42	AMAR378.9.20150901T234228Z.wav_chan0.xml	0	0
01/09/2015 23:50	AMAR378.9.20150901T235028Z.wav_chan0.xml	0	0
01/09/2015 23:58	AMAR378.9.20150901T235828Z.wav_chan0.xml	0	0
02/12/2015 0:06	AMAR378.9.20151202T000628Z.wav_chan0.xml	0	0
02/12/2015 0:14	AMAR378.9.20151202T001428Z.wav_chan0.xml	0	0
02/12/2015 0:22	AMAR378.9.20151202T002228Z.wav_chan0.xml	0	0
02/12/2015 0:30	AMAR378.9.20151202T003028Z.wav_chan0.xml	0	0
02/12/2015 0:38	AMAR378.9.20151202T003828Z.wav_chan0.xml	0	0
02/12/2015 0:46	AMAR378.9.20151202T004628Z.wav_chan0.xml	0	0
02/12/2015 0:54	AMAR378.9.20151202T005428Z.wav_chan0.xml	0	0
02/12/2015 1:02	AMAR378.9.20151202T010228Z.wav_chan0.xml	0	0
02/12/2015 1:10	AMAR378.9.20151202T011028Z.wav_chan0.xml	0	0
02/12/2015 1:18	AMAR378.9.20151202T011828Z.wav_chan0.xml	0	0
02/12/2015 1:26	AMAR378.9.20151202T012628Z.wav_chan0.xml	0	0
02/12/2015 1:34	AMAR378.9.20151202T013428Z.wav_chan0.xml	0	0
02/12/2015 1:42	AMAR378.9.20151202T014228Z.wav_chan0.xml	0	0
02/12/2015 1:50	AMAR378.9.20151202T015028Z.wav_chan0.xml	0	0
02/12/2015 1:58	AMAR378.9.20151202T015828Z.wav_chan0.xml	0	0
02/12/2015 2:06	AMAR378.9.20151202T020628Z.wav_chan0.xml	0	0
02/12/2015 2:14	AMAR378.9.20151202T021428Z.wav_chan0.xml	0	0
02/12/2015 2:22	AMAR378.9.20151202T022228Z.wav_chan0.xml	0	0
02/12/2015 2:30	AMAR378.9.20151202T023028Z.wav_chan0.xml	0	0
02/12/2015 2:38	AMAR378.9.20151202T023828Z.wav_chan0.xml	0	0
02/12/2015 2:46	AMAR378.9.20151202T024628Z.wav_chan0.xml	0	0
02/12/2015 2:54	AMAR378.9.20151202T025428Z.wav_chan0.xml	0	0
02/12/2015 3:02	AMAR378.9.20151202T030228Z.wav_chan0.xml	0	0
02/12/2015 3:10	AMAR378.9.20151202T031028Z.wav_chan0.xml	0	0
02/12/2015 3:18	AMAR378.9.20151202T031828Z.wav_chan0.xml	0	0
02/12/2015 3:26	AMAR378.9.20151202T032628Z.wav_chan0.xml	0	0
02/12/2015 3:34	AMAR378.9.20151202T033428Z.wav_chan0.xml	0	0
02/12/2015 3:42	AMAR378.9.20151202T034228Z.wav_chan0.xml	0	0
02/12/2015 3:50	AMAR378.9.20151202T035028Z.wav_chan0.xml	0	0
02/12/2015 3:58	AMAR378.9.20151202T035828Z.wav_chan0.xml	0	0
02/12/2015 4:06	AMAR378.9.20151202T040628Z.wav_chan0.xml	0	0
02/12/2015 4:14	AMAR378.9.20151202T041428Z.wav_chan0.xml	0	0
02/12/2015 4:22	AMAR378.9.20151202T042228Z.wav_chan0.xml	0	0
02/12/2015 4:30	AMAR378.9.20151202T043028Z.wav_chan0.xml	0	0
02/12/2015 4:38	AMAR378.9.20151202T043828Z.wav_chan0.xml	0	0
02/12/2015 4:46	AMAR378.9.20151202T044628Z.wav_chan0.xml	0	0
02/12/2015 4:54	AMAR378.9.20151202T045428Z.wav_chan0.xml	0	0
02/12/2015 5:02	AMAR378.9.20151202T050228Z.wav_chan0.xml	0	0
02/12/2015 5:10	AMAR378.9.20151202T051028Z.wav_chan0.xml	0	0
02/12/2015 5:18	AMAR378.9.20151202T051828Z.wav_chan0.xml	0	0
02/12/2015 5:26	AMAR378.9.20151202T052628Z.wav_chan0.xml	0	0
02/12/2015 5:34	AMAR378.9.20151202T053428Z.wav_chan0.xml	0	0
02/12/2015 5:42	AMAR378.9.20151202T054228Z.wav_chan0.xml	0	0
02/12/2015 5:50	AMAR378.9.20151202T055028Z.wav_chan0.xml	0	0
02/12/2015 5:58	AMAR378.9.20151202T055828Z.wav_chan0.xml	0	0
02/12/2015 6:06	AMAR378.9.20151202T060628Z.wav_chan0.xml	0	0
02/12/2015 6:14	AMAR378.9.20151202T061428Z.wav_chan0.xml	0	0
02/12/2015 6:22	AMAR378.9.20151202T062228Z.wav_chan0.xml	0	0
02/12/2015 6:30	AMAR378.9.20151202T063028Z.wav_chan0.xml	0	0
02/12/2015 6:38	AMAR378.9.20151202T063828Z.wav_chan0.xml	0	0
02/12/2015 6:46	AMAR378.9.20151202T064628Z.wav_chan0.xml	0	0
02/12/2015 6:54	AMAR378.9.20151202T065428Z.wav_chan0.xml	0	0
02/12/2015 7:02	AMAR378.9.20151202T070228Z.wav_chan0.xml	0	0
02/12/2015 7:10	AMAR378.9.20151202T071028Z.wav_chan0.xml	0	0
02/12/2015 7:18	AMAR378.9.20151202T071828Z.wav_chan0.xml	0	0
02/12/2015 7:26	AMAR378.9.20151202T072628Z.wav_chan0.xml	0	0
02/12/2015 7:34	AMAR378.9.20151202T073428Z.wav_chan0.xml	0	0
02/12/2015 7:42	AMAR378.9.20151202T074228Z.wav_chan0.xml	0	0
02/12/2015 7:50	AMAR378.9.20151202T075028Z.wav_chan0.xml	0	0
02/12/2015 7:58	AMAR378.9.20151202T075828Z.wav_chan0.xml	0	0
02/12/2015 8:06	AMAR378.9.20151202T080628Z.wav_chan0.xml	0	0
02/12/2015 8:14	AMAR378.9.20151202T081428Z.wav_chan0.xml	0	0
02/12/2015 8:22	AMAR378.9.20151202T082228Z.wav_chan0.xml	0	0
02/12/2015 8:30	AMAR378.9.20151202T083028Z.wav_chan0.xml	0	0
02/12/2015 8:38	AMAR378.9.20151202T083828Z.wav_chan0.xml	0	0
02/12/2015 8:46	AMAR378.9.20151202T084628Z.wav_chan0.xml	0	0
02/12/2015 8:54	AMAR378.9.20151202T085428Z.wav_chan0.xml	0	0
02/12/2015 9:02	AMAR378.9.20151202T090228Z.wav_chan0.xml	0	0
02/12/2015 9:10	AMAR378.9.20151202T091028Z.wav_chan0.xml	0	0
02/12/2015 9:18	AMAR378.9.20151202T091828Z.wav_chan0.xml	0	0
02/12/2015 9:26	AMAR378.9.20151202T092628Z.wav_chan0.xml	0	0
02/12/2015 9:34	AMAR378.9.20151202T093428Z.wav_chan0.xml	0	0
02/12/2015 9:42	AMAR378.9.20151202T094228Z.wav_chan0.xml	0	0
02/12/2015 9:50	AMAR378.9.20151202T095028Z.wav_chan0.xml	0	0
02/12/2015 9:58	AMAR378.9.20151202T095828Z.wav_chan0.xml	0	0
02/12/2015 10:06	AMAR378.9.20151202T100628Z.wav_chan0.xml	0	0
02/12/2015 10:14	AMAR378.9.20151202T101428Z.wav_chan0.xml	0	0
02/12/2015 10:22	AMAR378.9.20151202T102228Z.wav_chan0.xml	0	0
02/12/2015 10:30	AMAR378.9.20151202T103028Z.wav_chan0.xml	0	0
02/12/2015 10:38	AMAR378.9.20151202T103828Z.wav_chan0.xml	0	0
02/12/2015 10:46	AMAR378.9.20151202T104628Z.wav_chan0.xml	0	0
02/12/2015 10:54	AMAR378.9.20151202T105428Z.wav_chan0.xml	0	0
02/12/2015 11:02	AMAR378.9.20151202T110228Z.wav_chan0.xml	0	0
02/12/2015 11:10	AMAR378.9.20151202T111028Z.wav_chan0.xml	0	0
02/12/2015 11:18	AMAR378.9.20151202T111828Z.wav_chan0.xml	0	0
02/12/2015 11:26	AMAR378.9.20151202T112628Z.wav_chan0.xml	0	0
02/12/2015 11:34	AMAR378.9.20151202T113428Z.wav_chan0.xml	0	0
02/12/2015 11:42	AMAR378.9.20151202T114228Z.wav_chan0.xml	0	0
02/12/2015 11:50	AMAR378.9.20151202T115028Z.wav_chan0.xml	0	0
02/12/2015 11:58	AMAR378.9.20151202T115828Z.wav_chan0.xml	0	0
02/12/2015 12:06	AMAR378.9.20151202T120628Z.wav_chan0.xml	0	0
02/12/2015 12:14	AMAR378.9.20151202T121428Z.wav_chan0.xml	0	0
02/12/2015 12:22	AMAR378.9.20151202T122228Z.wav_chan0.xml	0	0
02/12/2015 12:30	AMAR378.9.20151202T123028Z.wav_chan0.xml	0	0
02/12/2015 12:38	AMAR378.9.20151202T123828Z.wav_chan0.xml	0	0
02/12/2015 12:46	AMAR378.9.20151202T124628Z.wav_chan0.xml	0	0
02/12/2015 12:54	AMAR378.9.20151202T125428Z.wav_chan0.xml	0	0
02/12/2015 13:02	AMAR378.9.20151202T130228Z.wav_chan0.xml	0	0
02/12/2015 13:10	AMAR378.9.20151202T131028Z.wav_chan0.xml	0	0
02/12/2015 13:18	AMAR378.9.20151202T131828Z.wav_chan0.xml	0	0
02/12/2015 13:26	AMAR378.9.20151202T132628Z.wav_chan0.xml	0	0
02/12/2015 13:34	AMAR378.9.20151202T133428Z.wav_chan0.xml	0	0
02/12/2015 13:42	AMAR378.9.20151202T134228Z.wav_chan0.xml	0	0
02/12/2015 13:50	AMAR378.9.20151202T135028Z.wav_chan0.xml	0	0
02/12/2015 13:58	AMAR378.9.20151202T135828Z.wav_chan0.xml	0	0
02/12/2015 14:06	AMAR378.9.20151202T140628Z.wav_chan0.xml	0	0
02/12/2015 14:14	AMAR378.9.20151202T141428Z.wav_chan0.xml	0	0
02/12/2015 14:22	AMAR378.9.20151202T142228Z.wav_chan0.xml	0	0
02/12/2015 14:30	AMAR378.9.20151202T143028Z.wav_chan0.xml	0	0
02/12/2015 14:38	AMAR378.9.20151202T143828Z.wav_chan0.xml	0	0
02/12/2015 14:46	AMAR378.9.20151202T144628Z.wav_chan0.xml	0	0
02/12/2015 14:54	AMAR378.9.20151202T145428Z.wav_chan0.xml	0	0
02/12/2015 15:02	AMAR378.9.20151202T150228Z.wav_chan0.xml	0	0
02/12/2015 15:10	AMAR378.9.20151202T151028Z.wav_chan0.xml	0	0
02/12/2015 15:18	AMAR378.9.20151202T151828Z.wav_chan0.xml	0	0
02/12/2015 15:26	AMAR378.9.20151202T152628Z.wav_chan0.xml	0	0
02/12/2015 15:34	AMAR378.9.20151202T153428Z.wav_chan0.xml	0	0
02/12/2015 15:42	AMAR378.9.20151202T154228Z.wav_chan0.xml	0	0
02/12/2015 15:50	AMAR378.9.20151202T155028Z.wav_chan0.xml	0	0
02/12/2015 15:58	AMAR378.9.20151202T155828Z.wav_chan0.xml	0	0
02/12/2015 16:06	AMAR378.9.20151202T160628Z.wav_chan0.xml	0	0
02/12/2015 16:14	AMAR378.9.20151202T161428Z.wav_chan0.xml	0	0
02/12/2015 16:22	AMAR378.9.20151202T162228Z.wav_chan0.xml	0	0
02/12/2015 16:30	AMAR378.9.20151202T163028Z.wav_chan0.xml	0	0
02/12/2015 16:38	AMAR378.9.20151202T163828Z.wav_chan0.xml	0	0
02/12/2015 16:46	AMAR378.9.20151202T164628Z.wav_chan0.xml	0	0
02/12/2015 16:54	AMAR378.9.20151202T165428Z.wav_chan0.xml	0	0
02/12/2015 17:02	AMAR378.9.20151202T170228Z.wav_chan0.xml	0	0
02/12/2015 17:10	AMAR378.9.20151202T171028Z.wav_chan0.xml	0	0
02/12/2015 17:18	AMAR378.9.20151202T171828Z.wav_chan0.xml	0	0
02/12/2015 17:26	AMAR378.9.20151202T172628Z.wav_chan0.xml	0	0
02/12/2015 17:34	AMAR378.9.20151202T173428Z.wav_chan0.xml	0	0
02/12/2015 17:42	AMAR378.9.20151202T174228Z.wav_chan0.xml	0	0
02/12/2015 17:50	AMAR378.9.20151202T175028Z.wav_chan0.xml	0	0
02/12/2015 17:58	AMAR378.9.20151202T175828Z.wav_chan0.xml	0	0
02/12/2015 18:06	AMAR378.9.20151202T180628Z.wav_chan0.xml	0	0
02/12/2015 18:14	AMAR378.9.20151202T181428Z.wav_chan0.xml	0	0
02/12/2015 18:22	AMAR378.9.20151202T182228Z.wav_chan0.xml	0	0
02/12/2015 18:30	AMAR378.9.20151202T183028Z.wav_chan0.xml	0	0
02/12/2015 18:38	AMAR378.9.20151202T183828Z.wav_chan0.xml	0	0
02/12/2015 18:46	AMAR378.9.20151202T184628Z.wav_chan0.xml	0	0
02/12/2015 18:54	AMAR378.9.20151202T185428Z.wav_chan0.xml	0	0
02/12/2015 19:02	AMAR378.9.20151202T190228Z.wav_chan0.xml	0	0
02/12/2015 19:10	AMAR378.9.20151202T191028Z.wav_chan0.xml	0	0
02/12/2015 19:18	AMAR378.9.20151202T191828Z.wav_chan0.xml	0	0
02/12/2015 19:26	AMAR378.9.20151202T192628Z.wav_chan0.xml	0	0
02/12/2015 19:34	AMAR378.9.20151202T193428Z.wav_chan0.xml	0	0
02/12/2015 19:42	AMAR378.9.20151202T194228Z.wav_chan0.xml	0	0
02/12/2015 19:50	AMAR378.9.20151202T195028Z.wav_chan0.xml	0	0
02/12/2015 19:58	AMAR378.9.20151202T195828Z.wav_chan0.xml	0	0
02/12/2015 20:06	AMAR378.9.20151202T200628Z.wav_chan0.xml	0	0
02/12/2015 20:14	AMAR378.9.20151202T201428Z.wav_chan0.xml	0	0
02/12/2015 20:22	AMAR378.9.20151202T202228Z.wav_chan0.xml	0	0
02/12/2015 20:30	AMAR378.9.20151202T203028Z.wav_chan0.xml	0	0
02/12/2015 20:38	AMAR378.9.20151202T203828Z.wav_chan0.xml	0	0
02/12/2015 20:46	AMAR378.9.20151202T204628Z.wav_chan0.xml	0	0
02/12/2015 20:54	AMAR378.9.20151202T205428Z.wav_chan0.xml	0	0
02/12/2015 21:02	AMAR378.9.20151202T210228Z.wav_chan0.xml	0	0
02/12/2015 21:10	AMAR378.9.20151202T211028Z.wav_chan0.xml	0	0
02/12/2015 21:18	AMAR378.9.20151202T211828Z.wav_chan0.xml	0	0
02/12/2015 21:26	AMAR378.9.20151202T212628Z.wav_chan0.xml	0	0
02/12/2015 21:34	AMAR378.9.20151202T213428Z.wav_chan0.xml	0	0
02/12/2015 21:42	AMAR378.9.20151202T214228Z.wav_chan0.xml	0	0
02/12/2015 21:50	AMAR378.9.20151202T215028Z.wav_chan0.xml	0	0
02/12/2015 21:58	AMAR378.9.20151202T215828Z.wav_chan0.xml	0	0
02/12/2015 22:06	AMAR378.9.20151202T220628Z.wav_chan0.xml	0	0
02/12/2015 22:14	AMAR378.9.20151202T221428Z.wav_chan0.xml	0	0
02/12/2015 22:22	AMAR378.9.20151202T222228Z.wav_chan0.xml	0	0
02/12/2015 22:30	AMAR378.9.20151202T223028Z.wav_chan0.xml	0	0
02/12/2015 22:38	AMAR378.9.20151202T223828Z.wav_chan0.xml	0	0
02/12/2015 22:46	AMAR378.9.20151202T224628Z.wav_chan0.xml	0	0
02/12/2015 22:54	AMAR378.9.20151202T225428Z.wav_chan0.xml	0	0
02/12/2015 23:02	AMAR378.9.20151202T230228Z.wav_chan0.xml	0	0
02/12/2015 23:10	AMAR378.9.20151202T231028Z.wav_chan0.xml	0	0
02/12/2015 23:18	AMAR378.9.20151202T231828Z.wav_chan0.xml	0	0
02/12/2015 23:26	AMAR378.9.20151202T232628Z.wav_chan0.xml	0	0
02/12/2015 23:34	AMAR378.9.20151202T233428Z.wav_chan0.xml	0	0
02/12/2015 23:42	AMAR378.9.20151202T234228Z.wav_chan0.xml	0	0
02/12/2015 23:50	AMAR378.9.20151202T235028Z.wav_chan0.xml	0	0
02/12/2015 23:58	AMAR378.9.20151202T235828Z.wav_chan0.xml	0	0
02/11/2015 0:06	AMAR378.9.20151102T000628Z.wav_chan0.xml	0	0
02/11/2015 0:14	AMAR378.9.20151102T001428Z.wav_chan0.xml	0	0
02/11/2015 0:22	AMAR378.9.20151102T002228Z.wav_chan0.xml	0	0
02/11/2015 0:30	AMAR378.9.20151102T003028Z.wav_chan0.xml	0	0
02/11/2015 0:38	AMAR378.9.20151102T003828Z.wav_chan0.xml	0	0
02/11/2015 0:46	AMAR378.9.20151102T004628Z.wav_chan0.xml	0	0
02/11/2015 0:54	AMAR378.9.20151102T005428Z.wav_chan0.xml	0	0
02/11/2015 1:02	AMAR378.9.20151102T010228Z.wav_chan0.xml	0	0
02/11/2015 1:10	AMAR378.9.20151102T011028Z.wav_chan0.xml	0	0
02/11/2015 1:18	AMAR378.9.20151102T011828Z.wav_chan0.xml	0	0
02/11/2015 1:26	AMAR378.9.20151102T012628Z.wav_chan0.xml	0	0
02/11/2015 1:34	AMAR378.9.20151102T013428Z.wav_chan0.xml	0	0
02/11/2015 1:42	AMAR378.9.20151102T014228Z.wav_chan0.xml	0	0
02/11/2015 1:50	AMAR378.9.20151102T015028Z.wav_chan0.xml	0	0
02/11/2015 1:58	AMAR378.9.20151102T015828Z.wav_chan0.xml	0	0
02/11/2015 2:06	AMAR378.9.20151102T020628Z.wav_chan0.xml	0	0
02/11/2015 2:14	AMAR378.9.20151102T021428Z.wav_chan0.xml	0	0
02/11/2015 2:22	AMAR378.9.20151102T022228Z.wav_chan0.xml	0	0
02/11/2015 2:30	AMAR378.9.20151102T023028Z.wav_chan0.xml	0	0
02/11/2015 2:38	AMAR378.9.20151102T023828Z.wav_chan0.xml	0	0
02/11/2015 2:46	AMAR378.9.20151102T024628Z.wav_chan0.xml	0	0
02/11/2015 2:54	AMAR378.9.20151102T025428Z.wav_chan0.xml	0	0
02/11/2015 3:02	AMAR378.9.20151102T030228Z.wav_chan0.xml	0	0
02/11/2015 3:10	AMAR378.9.20151102T031028Z.wav_chan0.xml	0	0
02/11/2015 3:18	AMAR378.9.20151102T031828Z.wav_chan0.xml	0	0
02/11/2015 3:26	AMAR378.9.20151102T032628Z.wav_chan0.xml	0	0
02/11/2015 3:34	AMAR378.9.20151102T033428Z.wav_chan0.xml	0	0
02/11/2015 3:42	AMAR378.9.20151102T034228Z.wav_chan0.xml	0	0
02/11/2015 3:50	AMAR378.9.20151102T035028Z.wav_chan0.xml	0	0
02/11/2015 3:58	AMAR378.9.20151102T035828Z.wav_chan0.xml	0	0
02/11/2015 4:06	AMAR378.9.20151102T040628Z.wav_chan0.xml	0	0
02/11/2015 4:14	AMAR378.9.20151102T041428Z.wav_chan0.xml	0	0
02/11/2015 4:22	AMAR378.9.20151102T042228Z.wav_chan0.xml	0	0
02/11/2015 4:30	AMAR378.9.20151102T043028Z.wav_chan0.xml	0	0
02/11/2015 4:38	AMAR378.9.20151102T043828Z.wav_chan0.xml	0	0
02/11/2015 4:46	AMAR378.9.20151102T044628Z.wav_chan0.xml	0	0
02/11/2015 4:54	AMAR378.9.20151102T045428Z.wav_chan0.xml	0	0
02/11/2015 5:02	AMAR378.9.20151102T050228Z.wav_chan0.xml	0	0
02/11/2015 5:10	AMAR378.9.20151102T051028Z.wav_chan0.xml	0	0
02/11/2015 5:18	AMAR378.9.20151102T051828Z.wav_chan0.xml	0	0
02/11/2015 5:26	AMAR378.9.20151102T052628Z.wav_chan0.xml	0	0
02/11/2015 5:34	AMAR378.9.20151102T053428Z.wav_chan0.xml	0	0
02/11/2015 5:42	AMAR378.9.20151102T054228Z.wav_chan0.xml	0	0
02/11/2015 5:50	AMAR378.9.20151102T055028Z.wav_chan0.xml	0	0
02/11/2015 5:58	AMAR378.9.20151102T055828Z.wav_chan0.xml	0	0
02/11/2015 6:06	AMAR378.9.20151102T060628Z.wav_chan0.xml	0	0
02/11/2015 6:14	AMAR378.9.20151102T061428Z.wav_chan0.xml	0	0
02/11/2015 6:22	AMAR378.9.20151102T062228Z.wav_chan0.xml	0	0
02/11/2015 6:30	AMAR378.9.20151102T063028Z.wav_chan0.xml	0	0
02/11/2015 6:38	AMAR378.9.20151102T063828Z.wav_chan0.xml	0	0
02/11/2015 6:46	AMAR378.9.20151102T064628Z.wav_chan0.xml	0	0
02/11/2015 6:54	AMAR378.9.20151102T065428Z.wav_chan0.xml	0	0
02/11/2015 7:02	AMAR378.9.20151102T070228Z.wav_chan0.xml	0	0
02/11/2015 7:10	AMAR378.9.20151102T071028Z.wav_chan0.xml	0	0
02/11/2015 7:18	AMAR378.9.20151102T071828Z.wav_chan0.xml	0	0
02/11/2015 7:26	AMAR378.9.20151102T072628Z.wav_chan0.xml	0	0
02/11/2015 7:34	AMAR378.9.20151102T073428Z.wav_chan0.xml	0	0
02/11/2015 7:42	AMAR378.9.20151102T074228Z.wav_chan0.xml	0	0
02/11/2015 7:50	AMAR378.9.20151102T075028Z.wav_chan0.xml	0	0
02/11/2015 7:58	AMAR378.9.20151102T075828Z.wav_chan0.xml	0	0
02/11/2015 8:06	AMAR378.9.20151102T080628Z.wav_chan0.xml	0	0
02/11/2015 8:14	AMAR378.9.20151102T081428Z.wav_chan0.xml	0	0
02/11/2015 8:22	AMAR378.9.20151102T082228Z.wav_chan0.xml	0	0
02/11/2015 8:30	AMAR378.9.20151102T083028Z.wav_chan0.xml	0	0
02/11/2015 8:38	AMAR378.9.20151102T083828Z.wav_chan0.xml	0	0
02/11/2015 8:46	AMAR378.9.20151102T084628Z.wav_chan0.xml	0	0
02/11/2015 8:54	AMAR378.9.20151102T085428Z.wav_chan0.xml	0	0
02/11/2015 9:02	AMAR378.9.20151102T090228Z.wav_chan0.xml	0	0
02/11/2015 9:10	AMAR378.9.20151102T091028Z.wav_chan0.xml	0	0
02/11/2015 9:18	AMAR378.9.20151102T091828Z.wav_chan0.xml	0	0
02/11/2015 9:26	AMAR378.9.20151102T092628Z.wav_chan0.xml	0	0
02/11/2015 9:34	AMAR378.9.20151102T093428Z.wav_chan0.xml	0	0
02/11/2015 9:42	AMAR378.9.20151102T094228Z.wav_chan0.xml	0	0
02/11/2015 9:50	AMAR378.9.20151102T095028Z.wav_chan0.xml	0	0
02/11/2015 9:58	AMAR378.9.20151102T095828Z.wav_chan0.xml	0	0
02/11/2015 10:06	AMAR378.9.20151102T100628Z.wav_chan0.xml	0	0
02/11/2015 10:14	AMAR378.9.20151102T101428Z.wav_chan0.xml	0	0
02/11/2015 10:22	AMAR378.9.20151102T102228Z.wav_chan0.xml	0	0
02/11/2015 10:30	AMAR378.9.20151102T103028Z.wav_chan0.xml	0	0
02/11/2015 10:38	AMAR378.9.20151102T103828Z.wav_chan0.xml	0	0
02/11/2015 10:46	AMAR378.9.20151102T104628Z.wav_chan0.xml	0	0
02/11/2015 10:54	AMAR378.9.20151102T105428Z.wav_chan0.xml	0	0
02/11/2015 11:02	AMAR378.9.20151102T110228Z.wav_chan0.xml	0	0
02/11/2015 11:10	AMAR378.9.20151102T111028Z.wav_chan0.xml	0	0
02/11/2015 11:18	AMAR378.9.20151102T111828Z.wav_chan0.xml	0	0
02/11/2015 11:26	AMAR378.9.20151102T112628Z.wav_chan0.xml	0	0
02/11/2015 11:34	AMAR378.9.20151102T113428Z.wav_chan0.xml	0	0
02/11/2015 11:42	AMAR378.9.20151102T114228Z.wav_chan0.xml	0	0
02/11/2015 11:50	AMAR378.9.20151102T115028Z.wav_chan0.xml	0	0
02/11/2015 11:58	AMAR378.9.20151102T115828Z.wav_chan0.xml	0	0
02/11/2015 12:06	AMAR378.9.20151102T120628Z.wav_chan0.xml	0	0
02/11/2015 12:14	AMAR378.9.20151102T121428Z.wav_chan0.xml	0	0
02/11/2015 12:22	AMAR378.9.20151102T122228Z.wav_chan0.xml	0	0
02/11/2015 12:30	AMAR378.9.20151102T123028Z.wav_chan0.xml	0	0
02/11/2015 12:38	AMAR378.9.20151102T123828Z.wav_chan0.xml	0	0
02/11/2015 12:46	AMAR378.9.20151102T124628Z.wav_chan0.xml	0	0
02/11/2015 12:54	AMAR378.9.20151102T125428Z.wav_chan0.xml	0	0
02/11/2015 13:02	AMAR378.9.20151102T130228Z.wav_chan0.xml	0	0
02/11/2015 13:10	AMAR378.9.20151102T131028Z.wav_chan0.xml	0	0
02/11/2015 13:18	AMAR378.9.20151102T131828Z.wav_chan0.xml	0	0
02/11/2015 13:26	AMAR378.9.20151102T132628Z.wav_chan0.xml	0	0
02/11/2015 13:34	AMAR378.9.20151102T133428Z.wav_chan0.xml	0	0
02/11/2015 13:42	AMAR378.9.20151102T134228Z.wav_chan0.xml	0	0
02/11/2015 13:50	AMAR378.9.20151102T135028Z.wav_chan0.xml	0	0
02/11/2015 13:58	AMAR378.9.20151102T135828Z.wav_chan0.xml	0	0
02/11/2015 14:06	AMAR378.9.20151102T140628Z.wav_chan0.xml	0	0
02/11/2015 14:14	AMAR378.9.20151102T141428Z.wav_chan0.xml	0	0
02/11/2015 14:22	AMAR378.9.20151102T142228Z.wav_chan0.xml	0	0
02/11/2015 14:30	AMAR378.9.20151102T143028Z.wav_chan0.xml	0	0
02/11/2015 14:38	AMAR378.9.20151102T143828Z.wav_chan0.xml	0	0
02/11/2015 14:46	AMAR378.9.20151102T144628Z.wav_chan0.xml	0	0
02/11/2015 14:54	AMAR378.9.20151102T145428Z.wav_chan0.xml	0	0
02/11/2015 15:02	AMAR378.9.20151102T150228Z.wav_chan0.xml	0	0
02/11/2015 15:10	AMAR378.9.20151102T151028Z.wav_chan0.xml	0	0
02/11/2015 15:18	AMAR378.9.20151102T151828Z.wav_chan0.xml	0	0
02/11/2015 15:26	AMAR378.9.20151102T152628Z.wav_chan0.xml	0	0
02/11/2015 15:34	AMAR378.9.20151102T153428Z.wav_chan0.xml	0	0
02/11/2015 15:42	AMAR378.9.20151102T154228Z.wav_chan0.xml	0	0
02/11/2015 15:50	AMAR378.9.20151102T155028Z.wav_chan0.xml	0	0
02/11/2015 15:58	AMAR378.9.20151102T155828Z.wav_chan0.xml	0	0
02/11/2015 16:06	AMAR378.9.20151102T160628Z.wav_chan0.xml	0	0
02/11/2015 16:14	AMAR378.9.20151102T161428Z.wav_chan0.xml	0	0
02/11/2015 16:22	AMAR378.9.20151102T162228Z.wav_chan0.xml	0	0
02/11/2015 16:30	AMAR378.9.20151102T163028Z.wav_chan0.xml	0	0
02/11/2015 16:38	AMAR378.9.20151102T163828Z.wav_chan0.xml	0	0
02/11/2015 16:46	AMAR378.9.20151102T164628Z.wav_chan0.xml	0	0
02/11/2015 16:54	AMAR378.9.20151102T165428Z.wav_chan0.xml	0	0
02/11/2015 17:02	AMAR378.9.20151102T170228Z.wav_chan0.xml	0	0
02/11/2015 17:10	AMAR378.9.20151102T171028Z.wav_chan0.xml	0	0
02/11/2015 17:18	AMAR378.9.20151102T171828Z.wav_chan0.xml	0	0
02/11/2015 17:26	AMAR378.9.20151102T172628Z.wav_chan0.xml	0	0
02/11/2015 17:34	AMAR378.9.20151102T173428Z.wav_chan0.xml	0	0
02/11/2015 17:42	AMAR378.9.20151102T174228Z.wav_chan0.xml	0	0
02/11/2015 17:50	AMAR378.9.20151102T175028Z.wav_chan0.xml	0	0
02/11/2015 17:58	AMAR378.9.20151102T175828Z.wav_chan0.xml	0	0
02/11/2015 18:06	AMAR378.9.20151102T180628Z.wav_chan0.xml	0	0
02/11/2015 18:14	AMAR378.9.20151102T181428Z.wav_chan0.xml	0	0
02/11/2015 18:22	AMAR378.9.20151102T182228Z.wav_chan0.xml	0	0
02/11/2015 18:30	AMAR378.9.20151102T183028Z.wav_chan0.xml	0	0
02/11/2015 18:38	AMAR378.9.20151102T183828Z.wav_chan0.xml	0	0
02/11/2015 18:46	AMAR378.9.20151102T184628Z.wav_chan0.xml	0	0
02/11/2015 18:54	AMAR378.9.20151102T185428Z.wav_chan0.xml	0	0
02/11/2015 19:02	AMAR378.9.20151102T190228Z.wav_chan0.xml	0	0
02/11/2015 19:10	AMAR378.9.20151102T191028Z.wav_chan0.xml	0	0
02/11/2015 19:18	AMAR378.9.20151102T191828Z.wav_chan0.xml	0	0
02/11/2015 19:26	AMAR378.9.20151102T192628Z.wav_chan0.xml	0	0
02/11/2015 19:34	AMAR378.9.20151102T193428Z.wav_chan0.xml	0	0
02/11/2015 19:42	AMAR378.9.20151102T194228Z.wav_chan0.xml	0	0
02/11/2015 19:50	AMAR378.9.20151102T195028Z.wav_chan0.xml	0	0
02/11/2015 19:58	AMAR378.9.20151102T195828Z.wav_chan0.xml	0	0
02/11/2015 20:06	AMAR378.9.20151102T200628Z.wav_chan0.xml	0	0
02/11/2015 20:14	AMAR378.9.20151102T201428Z.wav_chan0.xml	0	0
02/11/2015 20:22	AMAR378.9.20151102T202228Z.wav_chan0.xml	0	0
02/11/2015 20:30	AMAR378.9.20151102T203028Z.wav_chan0.xml	0	0
02/11/2015 20:38	AMAR378.9.20151102T203828Z.wav_chan0.xml	0	0
02/11/2015 20:46	AMAR378.9.20151102T204628Z.wav_chan0.xml	0	0
02/11/2015 20:54	AMAR378.9.20151102T205428Z.wav_chan0.xml	0	0
02/11/2015 21:02	AMAR378.9.20151102T210228Z.wav_chan0.xml	0	0
02/11/2015 21:10	AMAR378.9.20151102T211028Z.wav_chan0.xml	0	0
02/11/2015 21:18	AMAR378.9.20151102T211828Z.wav_chan0.xml	0	0
02/11/2015 21:26	AMAR378.9.20151102T212628Z.wav_chan0.xml	0	0
02/11/2015 21:34	AMAR378.9.20151102T213428Z.wav_chan0.xml	0	0
02/11/2015 21:42	AMAR378.9.20151102T214228Z.wav_chan0.xml	0	0
02/11/2015 21:50	AMAR378.9.20151102T215028Z.wav_chan0.xml	0	0
02/11/2015 21:58	AMAR378.9.20151102T215828Z.wav_chan0.xml	0	0
02/11/2015 22:06	AMAR378.9.20151102T220628Z.wav_chan0.xml	0	0
02/11/2015 22:14	AMAR378.9.20151102T221428Z.wav_chan0.xml	0	0
02/11/2015 22:22	AMAR378.9.20151102T222228Z.wav_chan0.xml	0	0
02/11/2015 22:30	AMAR378.9.20151102T223028Z.wav_chan0.xml	0	0
02/11/2015 22:38	AMAR378.9.20151102T223828Z.wav_chan0.xml	0	0
02/11/2015 22:46	AMAR378.9.20151102T224628Z.wav_chan0.xml	0	0
02/11/2015 22:54	AMAR378.9.20151102T225428Z.wav_chan0.xml	0	0
02/11/2015 23:02	AMAR378.9.20151102T230228Z.wav_chan0.xml	0	0
02/11/2015 23:10	AMAR378.9.20151102T231028Z.wav_chan0.xml	0	0
02/11/2015 23:18	AMAR378.9.20151102T231828Z.wav_chan0.xml	0	0
02/11/2015 23:26	AMAR378.9.20151102T232628Z.wav_chan0.xml	0	0
02/11/2015 23:34	AMAR378.9.20151102T233428Z.wav_chan0.xml	0	0
02/11/2015 23:42	AMAR378.9.20151102T234228Z.wav_chan0.xml	0	0
02/11/2015 23:50	AMAR378.9.20151102T235028Z.wav_chan0.xml	0	0
02/11/2015 23:58	AMAR378.9.20151102T235828Z.wav_chan0.xml	0	0
02/10/2015 0:06	AMAR378.9.20151002T000628Z.wav_chan0.xml	0	0
02/10/2015 0:14	AMAR378.9.20151002T001428Z.wav_chan0.xml	0	0
02/10/2015 0:22	AMAR378.9.20151002T002228Z.wav_chan0.xml	0	0
02/10/2015 0:30	AMAR378.9.20151002T003028Z.wav_chan0.xml	0	0
02/10/2015 0:38	AMAR378.9.20151002T003828Z.wav_chan0.xml	0	0
02/10/2015 0:46	AMAR378.9.20151002T004628Z.wav_chan0.xml	0	0
02/10/2015 0:54	AMAR378.9.20151002T005428Z.wav_chan0.xml	0	0
02/10/2015 1:02	AMAR378.9.20151002T010228Z.wav_chan0.xml	0	0
02/10/2015 1:10	AMAR378.9.20151002T011028Z.wav_chan0.xml	0	0
02/10/2015 1:18	AMAR378.9.20151002T011828Z.wav_chan0.xml	0	0
02/10/2015 1:26	AMAR378.9.20151002T012628Z.wav_chan0.xml	0	0
02/10/2015 1:34	AMAR378.9.20151002T013428Z.wav_chan0.xml	0	0
02/10/2015 1:42	AMAR378.9.20151002T014228Z.wav_chan0.xml	0	0
02/10/2015 1:50	AMAR378.9.20151002T015028Z.wav_chan0.xml	0	0
02/10/2015 1:58	AMAR378.9.20151002T015828Z.wav_chan0.xml	0	0
02/10/2015 2:06	AMAR378.9.20151002T020628Z.wav_chan0.xml	0	0
02/10/2015 2:14	AMAR378.9.20151002T021428Z.wav_chan0.xml	0	0
02/10/2015 2:22	AMAR378.9.20151002T022228Z.wav_chan0.xml	0	0
02/10/2015 2:30	AMAR378.9.20151002T023028Z.wav_chan0.xml	0	0
02/10/2015 2:38	AMAR378.9.20151002T023828Z.wav_chan0.xml	0	0
02/10/2015 2:46	AMAR378.9.20151002T024628Z.wav_chan0.xml	0	0
02/10/2015 2:54	AMAR378.9.20151002T025428Z.wav_chan0.xml	0	0
02/10/2015 3:02	AMAR378.9.20151002T030228Z.wav_chan0.xml	0	0
02/10/2015 3:10	AMAR378.9.20151002T031028Z.wav_chan0.xml	0	0
02/10/2015 3:18	AMAR378.9.20151002T031828Z.wav_chan0.xml	0	0
02/10/2015 3:26	AMAR378.9.20151002T032628Z.wav_chan0.xml	0	0
02/10/2015 3:34	AMAR378.9.20151002T033428Z.wav_chan0.xml	0	0
02/10/2015 3:42	AMAR378.9.20151002T034228Z.wav_chan0.xml	0	0
02/10/2015 3:50	AMAR378.9.20151002T035028Z.wav_chan0.xml	0	0
02/10/2015 3:58	AMAR378.9.20151002T035828Z.wav_chan0.xml	0	0
02/10/2015 4:06	AMAR378.9.20151002T040628Z.wav_chan0.xml	0	0
02/10/2015 4:14	AMAR378.9.20151002T041428Z.wav_chan0.xml	0	0
02/10/2015 4:22	AMAR378.9.20151002T042228Z.wav_chan0.xml	0	0
02/10/2015 4:30	AMAR378.9.20151002T043028Z.wav_chan0.xml	0	0
02/10/2015 4:38	AMAR378.9.20151002T043828Z.wav_chan0.xml	0	0
02/10/2015 4:46	AMAR378.9.20151002T044628Z.wav_chan0.xml	0	0
02/10/2015 4:54	AMAR378.9.20151002T045428Z.wav_chan0.xml	0	0
02/10/2015 5:02	AMAR378.9.20151002T050228Z.wav_chan0.xml	0	0
02/10/2015 5:10	AMAR378.9.20151002T051028Z.wav_chan0.xml	0	0
02/10/2015 5:18	AMAR378.9.20151002T051828Z.wav_chan0.xml	0	0
02/10/2015 5:26	AMAR378.9.20151002T052628Z.wav_chan0.xml	0	0
02/10/2015 5:34	AMAR378.9.20151002T053428Z.wav_chan0.xml	0	0
02/10/2015 5:42	AMAR378.9.20151002T054228Z.wav_chan0.xml	0	0
02/10/2015 5:50	AMAR378.9.20151002T055028Z.wav_chan0.xml	0	0
02/10/2015 5:58	AMAR378.9.20151002T055828Z.wav_chan0.xml	0	0
02/10/2015 6:06	AMAR378.9.20151002T060628Z.wav_chan0.xml	0	0
02/10/2015 6:14	AMAR378.9.20151002T061428Z.wav_chan0.xml	0	0
02/10/2015 6:22	AMAR378.9.20151002T062228Z.wav_chan0.xml	0	0
02/10/2015 6:30	AMAR378.9.20151002T063028Z.wav_chan0.xml	0	0
02/10/2015 6:38	AMAR378.9.20151002T063828Z.wav_chan0.xml	0	0
02/10/2015 6:46	AMAR378.9.20151002T064628Z.wav_chan0.xml	0	0
02/10/2015 6:54	AMAR378.9.20151002T065428Z.wav_chan0.xml	0	0
02/10/2015 7:02	AMAR378.9.20151002T070228Z.wav_chan0.xml	0	0
02/10/2015 7:10	AMAR378.9.20151002T071028Z.wav_chan0.xml	0	0
02/10/2015 7:18	AMAR378.9.20151002T071828Z.wav_chan0.xml	0	0
02/10/2015 7:26	AMAR378.9.20151002T072628Z.wav_chan0.xml	0	0
02/10/2015 7:34	AMAR378.9.20151002T073428Z.wav_chan0.xml	0	0
02/10/2015 7:42	AMAR378.9.20151002T074228Z.wav_chan0.xml	0	0
02/10/2015 7:50	AMAR378.9.20151002T075028Z.wav_chan0.xml	0	0
02/10/2015 7:58	AMAR378.9.20151002T075828Z.wav_chan0.xml	0	0
02/10/2015 8:06	AMAR378.9.20151002T080628Z.wav_chan0.xml	0	0
02/10/2015 8:14	AMAR378.9.20151002T081428Z.wav_chan0.xml	0	0
02/10/2015 8:22	AMAR378.9.20151002T082228Z.wav_chan0.xml	0	0
02/10/2015 8:30	AMAR378.9.20151002T083028Z.wav_chan0.xml	0	0
02/10/2015 8:38	AMAR378.9.20151002T083828Z.wav_chan0.xml	0	0
02/10/2015 8:46	AMAR378.9.20151002T084628Z.wav_chan0.xml	0	0
02/10/2015 8:54	AMAR378.9.20151002T085428Z.wav_chan0.xml	0	0
02/10/2015 9:02	AMAR378.9.20151002T090228Z.wav_chan0.xml	0	0
02/10/2015 9:10	AMAR378.9.20151002T091028Z.wav_chan0.xml	0	0
02/10/2015 9:18	AMAR378.9.20151002T091828Z.wav_chan0.xml	0	0
02/10/2015 9:26	AMAR378.9.20151002T092628Z.wav_chan0.xml	0	0
02/10/2015 9:34	AMAR378.9.20151002T093428Z.wav_chan0.xml	0	0
02/10/2015 9:42	AMAR378.9.20151002T094228Z.wav_chan0.xml	0	0
02/10/2015 9:50	AMAR378.9.20151002T095028Z.wav_chan0.xml	0	0
02/10/2015 9:58	AMAR378.9.20151002T095828Z.wav_chan0.xml	0	0
02/10/2015 10:06	AMAR378.9.20151002T100628Z.wav_chan0.xml	0	0
02/10/2015 10:14	AMAR378.9.20151002T101428Z.wav_chan0.xml	0	0
02/10/2015 10:22	AMAR378.9.20151002T102228Z.wav_chan0.xml	0	0
02/10/2015 10:30	AMAR378.9.20151002T103028Z.wav_chan0.xml	0	0
02/10/2015 10:38	AMAR378.9.20151002T103828Z.wav_chan0.xml	0	0
02/10/2015 10:46	AMAR378.9.20151002T104628Z.wav_chan0.xml	0	0
02/10/2015 10:54	AMAR378.9.20151002T105428Z.wav_chan0.xml	0	0
02/10/2015 11:02	AMAR378.9.20151002T110228Z.wav_chan0.xml	0	0
02/10/2015 11:10	AMAR378.9.20151002T111028Z.wav_chan0.xml	0	0
02/10/2015 11:18	AMAR378.9.20151002T111828Z.wav_chan0.xml	0	0
02/10/2015 11:26	AMAR378.9.20151002T112628Z.wav_chan0.xml	0	0
02/10/2015 11:34	AMAR378.9.20151002T113428Z.wav_chan0.xml	0	0
02/10/2015 11:42	AMAR378.9.20151002T114228Z.wav_chan0.xml	0	0
02/10/2015 11:50	AMAR378.9.20151002T115028Z.wav_chan0.xml	0	0
02/10/2015 11:58	AMAR378.9.20151002T115828Z.wav_chan0.xml	0	0
02/10/2015 12:06	AMAR378.9.20151002T120628Z.wav_chan0.xml	0	0
02/10/2015 12:14	AMAR378.9.20151002T121428Z.wav_chan0.xml	0	0
02/10/2015 12:22	AMAR378.9.20151002T122228Z.wav_chan0.xml	0	0
02/10/2015 12:30	AMAR378.9.20151002T123028Z.wav_chan0.xml	0	0
02/10/2015 12:38	AMAR378.9.20151002T123828Z.wav_chan0.xml	0	0
02/10/2015 12:46	AMAR378.9.20151002T124628Z.wav_chan0.xml	0	0
02/10/2015 12:54	AMAR378.9.20151002T125428Z.wav_chan0.xml	0	0
02/10/2015 13:02	AMAR378.9.20151002T130228Z.wav_chan0.xml	0	0
02/10/2015 13:10	AMAR378.9.20151002T131028Z.wav_chan0.xml	0	0
02/10/2015 13:18	AMAR378.9.20151002T131828Z.wav_chan0.xml	0	0
02/10/2015 13:26	AMAR378.9.20151002T132628Z.wav_chan0.xml	0	0
02/10/2015 13:34	AMAR378.9.20151002T133428Z.wav_chan0.xml	0	0
02/10/2015 13:42	AMAR378.9.20151002T134228Z.wav_chan0.xml	0	0
02/10/2015 13:50	AMAR378.9.20151002T135028Z.wav_chan0.xml	0	0
02/10/2015 13:58	AMAR378.9.20151002T135828Z.wav_chan0.xml	0	0
02/10/2015 14:06	AMAR378.9.20151002T140628Z.wav_chan0.xml	0	0
02/10/2015 14:14	AMAR378.9.20151002T141428Z.wav_chan0.xml	0	0
02/10/2015 14:22	AMAR378.9.20151002T142228Z.wav_chan0.xml	0	0
02/10/2015 14:30	AMAR378.9.20151002T143028Z.wav_chan0.xml	0	0
02/10/2015 14:38	AMAR378.9.20151002T143828Z.wav_chan0.xml	0	0
02/10/2015 14:46	AMAR378.9.20151002T144628Z.wav_chan0.xml	0	0
02/10/2015 14:54	AMAR378.9.20151002T145428Z.wav_chan0.xml	0	0
02/10/2015 15:02	AMAR378.9.20151002T150228Z.wav_chan0.xml	0	0
02/10/2015 15:10	AMAR378.9.20151002T151028Z.wav_chan0.xml	0	0
02/10/2015 15:18	AMAR378.9.20151002T151828Z.wav_chan0.xml	0	0
02/10/2015 15:26	AMAR378.9.20151002T152628Z.wav_chan0.xml	0	0
02/10/2015 15:34	AMAR378.9.20151002T153428Z.wav_chan0.xml	0	0
02/10/2015 15:42	AMAR378.9.20151002T154228Z.wav_chan0.xml	0	0
02/10/2015 15:50	AMAR378.9.20151002T155028Z.wav_chan0.xml	0	0
02/10/2015 15:58	AMAR378.9.20151002T155828Z.wav_chan0.xml	0	0
02/10/2015 16:06	AMAR378.9.20151002T160628Z.wav_chan0.xml	0	0
02/10/2015 16:14	AMAR378.9.20151002T161428Z.wav_chan0.xml	0	0
02/10/2015 16:22	AMAR378.9.20151002T162228Z.wav_chan0.xml	0	0
02/10/2015 16:30	AMAR378.9.20151002T163028Z.wav_chan0.xml	0	0
02/10/2015 16:38	AMAR378.9.20151002T163828Z.wav_chan0.xml	0	0
02/10/2015 16:46	AMAR378.9.20151002T164628Z.wav_chan0.xml	0	0
02/10/2015 16:54	AMAR378.9.20151002T165428Z.wav_chan0.xml	0	0
02/10/2015 17:02	AMAR378.9.20151002T170228Z.wav_chan0.xml	0	0
02/10/2015 17:10	AMAR378.9.20151002T171028Z.wav_chan0.xml	0	0
02/10/2015 17:18	AMAR378.9.20151002T171828Z.wav_chan0.xml	0	0
02/10/2015 17:26	AMAR378.9.20151002T172628Z.wav_chan0.xml	0	0
02/10/2015 17:34	AMAR378.9.20151002T173428Z.wav_chan0.xml	0	0
02/10/2015 17:42	AMAR378.9.20151002T174228Z.wav_chan0.xml	0	0
02/10/2015 17:50	AMAR378.9.20151002T175028Z.wav_chan0.xml	0	0
02/10/2015 17:58	AMAR378.9.20151002T175828Z.wav_chan0.xml	0	0
02/10/2015 18:06	AMAR378.9.20151002T180628Z.wav_chan0.xml	0	0
02/10/2015 18:14	AMAR378.9.20151002T181428Z.wav_chan0.xml	0	0
02/10/2015 18:22	AMAR378.9.20151002T182228Z.wav_chan0.xml	0	0
02/10/2015 18:30	AMAR378.9.20151002T183028Z.wav_chan0.xml	0	0
02/10/2015 18:38	AMAR378.9.20151002T183828Z.wav_chan0.xml	0	0
02/10/2015 18:46	AMAR378.9.20151002T184628Z.wav_chan0.xml	0	0
02/10/2015 18:54	AMAR378.9.20151002T185428Z.wav_chan0.xml	0	0
02/10/2015 19:02	AMAR378.9.20151002T190228Z.wav_chan0.xml	0	0
02/10/2015 19:10	AMAR378.9.20151002T191028Z.wav_chan0.xml	0	0
02/10/2015 19:18	AMAR378.9.20151002T191828Z.wav_chan0.xml	0	0
02/10/2015 19:26	AMAR378.9.20151002T192628Z.wav_chan0.xml	0	0
02/10/2015 19:34	AMAR378.9.20151002T193428Z.wav_chan0.xml	0	0
02/10/2015 19:42	AMAR378.9.20151002T194228Z.wav_chan0.xml	0	0
02/10/2015 19:50	AMAR378.9.20151002T195028Z.wav_chan0.xml	0	0
02/10/2015 19:58	AMAR378.9.20151002T195828Z.wav_chan0.xml	0	0
02/10/2015 20:06	AMAR378.9.20151002T200628Z.wav_chan0.xml	0	0
02/10/2015 20:14	AMAR378.9.20151002T201428Z.wav_chan0.xml	0	0
02/10/2015 20:22	AMAR378.9.20151002T202228Z.wav_chan0.xml	0	0
02/10/2015 20:30	AMAR378.9.20151002T203028Z.wav_chan0.xml	0	0
02/10/2015 20:38	AMAR378.9.20151002T203828Z.wav_chan0.xml	0	0
02/10/2015 20:46	AMAR378.9.20151002T204628Z.wav_chan0.xml	0	0
02/10/2015 20:54	AMAR378.9.20151002T205428Z.wav_chan0.xml	0	0
02/10/2015 21:02	AMAR378.9.20151002T210228Z.wav_chan0.xml	0	0
02/10/2015 21:10	AMAR378.9.20151002T211028Z.wav_chan0.xml	0	0
02/10/2015 21:18	AMAR378.9.20151002T211828Z.wav_chan0.xml	0	0
02/10/2015 21:26	AMAR378.9.20151002T212628Z.wav_chan0.xml	0	0
02/10/2015 21:34	AMAR378.9.20151002T213428Z.wav_chan0.xml	0	0
02/10/2015 21:42	AMAR378.9.20151002T214228Z.wav_chan0.xml	0	0
02/10/2015 21:50	AMAR378.9.20151002T215028Z.wav_chan0.xml	0	0
02/10/2015 21:58	AMAR378.9.20151002T215828Z.wav_chan0.xml	0	0
02/10/2015 22:06	AMAR378.9.20151002T220628Z.wav_chan0.xml	0	0
02/10/2015 22:14	AMAR378.9.20151002T221428Z.wav_chan0.xml	0	0
02/10/2015 22:22	AMAR378.9.20151002T222228Z.wav_chan0.xml	0	0
02/10/2015 22:30	AMAR378.9.20151002T223028Z.wav_chan0.xml	0	0
02/10/2015 22:38	AMAR378.9.20151002T223828Z.wav_chan0.xml	0	0
02/10/2015 22:46	AMAR378.9.20151002T224628Z.wav_chan0.xml	0	0
02/10/2015 22:54	AMAR378.9.20151002T225428Z.wav_chan0.xml	0	0
02/10/2015 23:02	AMAR378.9.20151002T230228Z.wav_chan0.xml	0	0
02/10/2015 23:10	AMAR378.9.20151002T231028Z.wav_chan0.xml	0	0
02/10/2015 23:18	AMAR378.9.20151002T231828Z.wav_chan0.xml	0	0
02/10/2015 23:26	AMAR378.9.20151002T232628Z.wav_chan0.xml	0	0
02/10/2015 23:34	AMAR378.9.20151002T233428Z.wav_chan0.xml	0	0
02/10/2015 23:42	AMAR378.9.20151002T234228Z.wav_chan0.xml	0	0
02/10/2015 23:50	AMAR378.9.20151002T235028Z.wav_chan0.xml	0	0
02/10/2015 23:58	AMAR378.9.20151002T235828Z.wav_chan0.xml	0	0
02/09/2015 0:06	AMAR378.9.20150902T000628Z.wav_chan0.xml	0	0
02/09/2015 0:14	AMAR378.9.20150902T001428Z.wav_chan0.xml	0	0
02/09/2015 0:22	AMAR378.9.20150902T002228Z.wav_chan0.xml	0	0
02/09/2015 0:30	AMAR378.9.20150902T003028Z.wav_chan0.xml	0	0
02/09/2015 0:38	AMAR378.9.20150902T003828Z.wav_chan0.xml	0	0
02/09/2015 0:46	AMAR378.9.20150902T004628Z.wav_chan0.xml	0	0
02/09/2015 0:54	AMAR378.9.20150902T005428Z.wav_chan0.xml	0	0
02/09/2015 1:02	AMAR378.9.20150902T010228Z.wav_chan0.xml	0	0
02/09/2015 1:10	AMAR378.9.20150902T011028Z.wav_chan0.xml	0	0
02/09/2015 1:18	AMAR378.9.20150902T011828Z.wav_chan0.xml	0	0
02/09/2015 1:26	AMAR378.9.20150902T012628Z.wav_chan0.xml	0	0
02/09/2015 1:34	AMAR378.9.20150902T013428Z.wav_chan0.xml	0	0
02/09/2015 1:42	AMAR378.9.20150902T014228Z.wav_chan0.xml	0	0
02/09/2015 1:50	AMAR378.9.20150902T015028Z.wav_chan0.xml	0	0
02/09/2015 1:58	AMAR378.9.20150902T015828Z.wav_chan0.xml	0	0
02/09/2015 2:06	AMAR378.9.20150902T020628Z.wav_chan0.xml	0	0
02/09/2015 2:14	AMAR378.9.20150902T021428Z.wav_chan0.xml	0	0
02/09/2015 2:22	AMAR378.9.20150902T022228Z.wav_chan0.xml	0	0
02/09/2015 2:30	AMAR378.9.20150902T023028Z.wav_chan0.xml	0	0
02/09/2015 2:38	AMAR378.9.20150902T023828Z.wav_chan0.xml	0	0
02/09/2015 2:46	AMAR378.9.20150902T024628Z.wav_chan0.xml	0	0
02/09/2015 2:54	AMAR378.9.20150902T025428Z.wav_chan0.xml	0	0
02/09/2015 3:02	AMAR378.9.20150902T030228Z.wav_chan0.xml	0	0
02/09/2015 3:10	AMAR378.9.20150902T031028Z.wav_chan0.xml	0	0
02/09/2015 3:18	AMAR378.9.20150902T031828Z.wav_chan0.xml	0	0
02/09/2015 3:26	AMAR378.9.20150902T032628Z.wav_chan0.xml	0	0
02/09/2015 3:34	AMAR378.9.20150902T033428Z.wav_chan0.xml	0	0
02/09/2015 3:42	AMAR378.9.20150902T034228Z.wav_chan0.xml	0	0
02/09/2015 3:50	AMAR378.9.20150902T035028Z.wav_chan0.xml	0	0
02/09/2015 3:58	AMAR378.9.20150902T035828Z.wav_chan0.xml	0	0
02/09/2015 4:06	AMAR378.9.20150902T040628Z.wav_chan0.xml	0	0
02/09/2015 4:14	AMAR378.9.20150902T041428Z.wav_chan0.xml	0	0
02/09/2015 4:22	AMAR378.9.20150902T042228Z.wav_chan0.xml	0	0
02/09/2015 4:30	AMAR378.9.20150902T043028Z.wav_chan0.xml	0	0
02/09/2015 4:38	AMAR378.9.20150902T043828Z.wav_chan0.xml	0	0
02/09/2015 4:46	AMAR378.9.20150902T044628Z.wav_chan0.xml	0	0
02/09/2015 4:54	AMAR378.9.20150902T045428Z.wav_chan0.xml	0	0
02/09/2015 5:02	AMAR378.9.20150902T050228Z.wav_chan0.xml	0	0
02/09/2015 5:10	AMAR378.9.20150902T051028Z.wav_chan0.xml	0	0
02/09/2015 5:18	AMAR378.9.20150902T051828Z.wav_chan0.xml	0	0
02/09/2015 5:26	AMAR378.9.20150902T052628Z.wav_chan0.xml	0	0
02/09/2015 5:34	AMAR378.9.20150902T053428Z.wav_chan0.xml	0	0
02/09/2015 5:42	AMAR378.9.20150902T054228Z.wav_chan0.xml	0	0
02/09/2015 5:50	AMAR378.9.20150902T055028Z.wav_chan0.xml	0	0
02/09/2015 5:58	AMAR378.9.20150902T055828Z.wav_chan0.xml	0	0
02/09/2015 6:06	AMAR378.9.20150902T060628Z.wav_chan0.xml	0	0
02/09/2015 6:14	AMAR378.9.20150902T061428Z.wav_chan0.xml	0	0
02/09/2015 6:22	AMAR378.9.20150902T062228Z.wav_chan0.xml	0	0
02/09/2015 6:30	AMAR378.9.20150902T063028Z.wav_chan0.xml	0	0
02/09/2015 6:38	AMAR378.9.20150902T063828Z.wav_chan0.xml	0	0
02/09/2015 6:46	AMAR378.9.20150902T064628Z.wav_chan0.xml	0	0
02/09/2015 6:54	AMAR378.9.20150902T065428Z.wav_chan0.xml	0	0
02/09/2015 7:02	AMAR378.9.20150902T070228Z.wav_chan0.xml	0	0
02/09/2015 7:10	AMAR378.9.20150902T071028Z.wav_chan0.xml	0	0
02/09/2015 7:18	AMAR378.9.20150902T071828Z.wav_chan0.xml	0	0
02/09/2015 7:26	AMAR378.9.20150902T072628Z.wav_chan0.xml	0	0
02/09/2015 7:34	AMAR378.9.20150902T073428Z.wav_chan0.xml	0	0
02/09/2015 7:42	AMAR378.9.20150902T074228Z.wav_chan0.xml	0	0
02/09/2015 7:50	AMAR378.9.20150902T075028Z.wav_chan0.xml	0	0
02/09/2015 7:58	AMAR378.9.20150902T075828Z.wav_chan0.xml	0	0
02/09/2015 8:06	AMAR378.9.20150902T080628Z.wav_chan0.xml	0	0
02/09/2015 8:14	AMAR378.9.20150902T081428Z.wav_chan0.xml	0	0
02/09/2015 8:22	AMAR378.9.20150902T082228Z.wav_chan0.xml	0	0
02/09/2015 8:30	AMAR378.9.20150902T083028Z.wav_chan0.xml	0	0
02/09/2015 8:38	AMAR378.9.20150902T083828Z.wav_chan0.xml	0	0
02/09/2015 8:46	AMAR378.9.20150902T084628Z.wav_chan0.xml	0	0
02/09/2015 8:54	AMAR378.9.20150902T085428Z.wav_chan0.xml	0	0
02/09/2015 9:02	AMAR378.9.20150902T090228Z.wav_chan0.xml	0	0
02/09/2015 9:10	AMAR378.9.20150902T091028Z.wav_chan0.xml	0	0
02/09/2015 9:18	AMAR378.9.20150902T091828Z.wav_chan0.xml	0	0
02/09/2015 9:26	AMAR378.9.20150902T092628Z.wav_chan0.xml	0	0
02/09/2015 9:34	AMAR378.9.20150902T093428Z.wav_chan0.xml	0	0
02/09/2015 9:42	AMAR378.9.20150902T094228Z.wav_chan0.xml	0	0
02/09/2015 9:50	AMAR378.9.20150902T095028Z.wav_chan0.xml	0	0
02/09/2015 9:58	AMAR378.9.20150902T095828Z.wav_chan0.xml	0	0
02/09/2015 10:06	AMAR378.9.20150902T100628Z.wav_chan0.xml	0	0
02/09/2015 10:14	AMAR378.9.20150902T101428Z.wav_chan0.xml	0	0
02/09/2015 10:22	AMAR378.9.20150902T102228Z.wav_chan0.xml	0	0
02/09/2015 10:30	AMAR378.9.20150902T103028Z.wav_chan0.xml	0	0
02/09/2015 10:38	AMAR378.9.20150902T103828Z.wav_chan0.xml	0	0
02/09/2015 10:46	AMAR378.9.20150902T104628Z.wav_chan0.xml	0	0
02/09/2015 10:54	AMAR378.9.20150902T105428Z.wav_chan0.xml	0	0
02/09/2015 11:02	AMAR378.9.20150902T110228Z.wav_chan0.xml	0	0
02/09/2015 11:10	AMAR378.9.20150902T111028Z.wav_chan0.xml	0	0
02/09/2015 11:18	AMAR378.9.20150902T111828Z.wav_chan0.xml	0	0
02/09/2015 11:26	AMAR378.9.20150902T112628Z.wav_chan0.xml	0	0
02/09/2015 11:34	AMAR378.9.20150902T113428Z.wav_chan0.xml	0	0
02/09/2015 11:42	AMAR378.9.20150902T114228Z.wav_chan0.xml	0	0
02/09/2015 11:50	AMAR378.9.20150902T115028Z.wav_chan0.xml	0	0
02/09/2015 11:58	AMAR378.9.20150902T115828Z.wav_chan0.xml	0	0
02/09/2015 12:06	AMAR378.9.20150902T120628Z.wav_chan0.xml	0	0
02/09/2015 12:14	AMAR378.9.20150902T121428Z.wav_chan0.xml	0	0
02/09/2015 12:22	AMAR378.9.20150902T122228Z.wav_chan0.xml	0	0
02/09/2015 12:30	AMAR378.9.20150902T123028Z.wav_chan0.xml	0	0
02/09/2015 12:38	AMAR378.9.20150902T123828Z.wav_chan0.xml	0	0
02/09/2015 12:46	AMAR378.9.20150902T124628Z.wav_chan0.xml	0	0
02/09/2015 12:54	AMAR378.9.20150902T125428Z.wav_chan0.xml	0	0
02/09/2015 13:02	AMAR378.9.20150902T130228Z.wav_chan0.xml	0	0
02/09/2015 13:10	AMAR378.9.20150902T131028Z.wav_chan0.xml	0	0
02/09/2015 13:18	AMAR378.9.20150902T131828Z.wav_chan0.xml	0	0
02/09/2015 13:26	AMAR378.9.20150902T132628Z.wav_chan0.xml	0	0
02/09/2015 13:34	AMAR378.9.20150902T133428Z.wav_chan0.xml	0	0
02/09/2015 13:42	AMAR378.9.20150902T134228Z.wav_chan0.xml	0	0
02/09/2015 13:50	AMAR378.9.20150902T135028Z.wav_chan0.xml	0	0
02/09/2015 13:58	AMAR378.9.20150902T135828Z.wav_chan0.xml	0	0
02/09/2015 14:06	AMAR378.9.20150902T140628Z.wav_chan0.xml	0	0
02/09/2015 14:14	AMAR378.9.20150902T141428Z.wav_chan0.xml	0	0
02/09/2015 14:22	AMAR378.9.20150902T142228Z.wav_chan0.xml	0	0
02/09/2015 14:30	AMAR378.9.20150902T143028Z.wav_chan0.xml	0	0
02/09/2015 14:38	AMAR378.9.20150902T143828Z.wav_chan0.xml	0	0
02/09/2015 14:46	AMAR378.9.20150902T144628Z.wav_chan0.xml	0	0
02/09/2015 14:54	AMAR378.9.20150902T145428Z.wav_chan0.xml	0	0
02/09/2015 15:02	AMAR378.9.20150902T150228Z.wav_chan0.xml	0	0
02/09/2015 15:10	AMAR378.9.20150902T151028Z.wav_chan0.xml	0	0
02/09/2015 15:18	AMAR378.9.20150902T151828Z.wav_chan0.xml	0	0
02/09/2015 15:26	AMAR378.9.20150902T152628Z.wav_chan0.xml	0	0
02/09/2015 15:34	AMAR378.9.20150902T153428Z.wav_chan0.xml	0	0
02/09/2015 15:42	AMAR378.9.20150902T154228Z.wav_chan0.xml	0	0
02/09/2015 15:50	AMAR378.9.20150902T155028Z.wav_chan0.xml	0	0
02/09/2015 15:58	AMAR378.9.20150902T155828Z.wav_chan0.xml	0	0
02/09/2015 16:06	AMAR378.9.20150902T160628Z.wav_chan0.xml	0	0
02/09/2015 16:14	AMAR378.9.20150902T161428Z.wav_chan0.xml	0	0
02/09/2015 16:22	AMAR378.9.20150902T162228Z.wav_chan0.xml	0	0
02/09/2015 16:30	AMAR378.9.20150902T163028Z.wav_chan0.xml	0	0
02/09/2015 16:38	AMAR378.9.20150902T163828Z.wav_chan0.xml	0	0
02/09/2015 16:46	AMAR378.9.20150902T164628Z.wav_chan0.xml	0	0
02/09/2015 16:54	AMAR378.9.20150902T165428Z.wav_chan0.xml	0	0
02/09/2015 17:02	AMAR378.9.20150902T170228Z.wav_chan0.xml	0	0
02/09/2015 17:10	AMAR378.9.20150902T171028Z.wav_chan0.xml	0	0
02/09/2015 17:18	AMAR378.9.20150902T171828Z.wav_chan0.xml	0	0
02/09/2015 17:26	AMAR378.9.20150902T172628Z.wav_chan0.xml	0	0
02/09/2015 17:34	AMAR378.9.20150902T173428Z.wav_chan0.xml	0	0
02/09/2015 17:42	AMAR378.9.20150902T174228Z.wav_chan0.xml	0	0
02/09/2015 17:50	AMAR378.9.20150902T175028Z.wav_chan0.xml	0	0
02/09/2015 17:58	AMAR378.9.20150902T175828Z.wav_chan0.xml	0	0
02/09/2015 18:06	AMAR378.9.20150902T180628Z.wav_chan0.xml	0	0
02/09/2015 18:14	AMAR378.9.20150902T181428Z.wav_chan0.xml	0	0
02/09/2015 18:22	AMAR378.9.20150902T182228Z.wav_chan0.xml	0	0
02/09/2015 18:30	AMAR378.9.20150902T183028Z.wav_chan0.xml	0	0
02/09/2015 18:38	AMAR378.9.20150902T183828Z.wav_chan0.xml	0	0
02/09/2015 18:46	AMAR378.9.20150902T184628Z.wav_chan0.xml	0	0
02/09/2015 18:54	AMAR378.9.20150902T185428Z.wav_chan0.xml	0	0
02/09/2015 19:02	AMAR378.9.20150902T190228Z.wav_chan0.xml	0	0
02/09/2015 19:10	AMAR378.9.20150902T191028Z.wav_chan0.xml	0	0
02/09/2015 19:18	AMAR378.9.20150902T191828Z.wav_chan0.xml	0	0
02/09/2015 19:26	AMAR378.9.20150902T192628Z.wav_chan0.xml	0	0
02/09/2015 19:34	AMAR378.9.20150902T193428Z.wav_chan0.xml	0	0
02/09/2015 19:42	AMAR378.9.20150902T194228Z.wav_chan0.xml	0	0
02/09/2015 19:50	AMAR378.9.20150902T195028Z.wav_chan0.xml	0	0
02/09/2015 19:58	AMAR378.9.20150902T195828Z.wav_chan0.xml	0	0
02/09/2015 20:06	AMAR378.9.20150902T200628Z.wav_chan0.xml	0	0
02/09/2015 20:14	AMAR378.9.20150902T201428Z.wav_chan0.xml	0	0
02/09/2015 20:22	AMAR378.9.20150902T202228Z.wav_chan0.xml	0	0
02/09/2015 20:30	AMAR378.9.20150902T203028Z.wav_chan0.xml	0	0
02/09/2015 20:38	AMAR378.9.20150902T203828Z.wav_chan0.xml	0	0
02/09/2015 20:46	AMAR378.9.20150902T204628Z.wav_chan0.xml	0	0
02/09/2015 20:54	AMAR378.9.20150902T205428Z.wav_chan0.xml	0	0
02/09/2015 21:02	AMAR378.9.20150902T210228Z.wav_chan0.xml	0	0
02/09/2015 21:10	AMAR378.9.20150902T211028Z.wav_chan0.xml	0	0
02/09/2015 21:18	AMAR378.9.20150902T211828Z.wav_chan0.xml	0	0
02/09/2015 21:26	AMAR378.9.20150902T212628Z.wav_chan0.xml	0	0
02/09/2015 21:34	AMAR378.9.20150902T213428Z.wav_chan0.xml	0	0
02/09/2015 21:42	AMAR378.9.20150902T214228Z.wav_chan0.xml	0	0
02/09/2015 21:50	AMAR378.9.20150902T215028Z.wav_chan0.xml	0	0
02/09/2015 21:58	AMAR378.9.20150902T215828Z.wav_chan0.xml	0	0
02/09/2015 22:06	AMAR378.9.20150902T220628Z.wav_chan0.xml	0	0
02/09/2015 22:14	AMAR378.9.20150902T221428Z.wav_chan0.xml	0	0
02/09/2015 22:22	AMAR378.9.20150902T222228Z.wav_chan0.xml	0	0
02/09/2015 22:30	AMAR378.9.20150902T223028Z.wav_chan0.xml	0	0
02/09/2015 22:38	AMAR378.9.20150902T223828Z.wav_chan0.xml	0	0
02/09/2015 22:46	AMAR378.9.20150902T224628Z.wav_chan0.xml	0	0
02/09/2015 22:54	AMAR378.9.20150902T225428Z.wav_chan0.xml	0	0
02/09/2015 23:02	AMAR378.9.20150902T230228Z.wav_chan0.xml	0	0
02/09/2015 23:10	AMAR378.9.20150902T231028Z.wav_chan0.xml	0	0
02/09/2015 23:18	AMAR378.9.20150902T231828Z.wav_chan0.xml	0	0
02/09/2015 23:26	AMAR378.9.20150902T232628Z.wav_chan0.xml	0	0
02/09/2015 23:34	AMAR378.9.20150902T233428Z.wav_chan0.xml	0	0
02/09/2015 23:42	AMAR378.9.20150902T234228Z.wav_chan0.xml	0	0
02/09/2015 23:50	AMAR378.9.20150902T235028Z.wav_chan0.xml	0	0
02/09/2015 23:58	AMAR378.9.20150902T235828Z.wav_chan0.xml	0	0
03/12/2015 0:06	AMAR378.9.20151203T000628Z.wav_chan0.xml	0	0
03/12/2015 0:14	AMAR378.9.20151203T001428Z.wav_chan0.xml	0	0
03/12/2015 0:22	AMAR378.9.20151203T002228Z.wav_chan0.xml	0	0
03/12/2015 0:30	AMAR378.9.20151203T003028Z.wav_chan0.xml	0	0
03/12/2015 0:38	AMAR378.9.20151203T003828Z.wav_chan0.xml	0	0
03/12/2015 0:46	AMAR378.9.20151203T004628Z.wav_chan0.xml	0	0
03/12/2015 0:54	AMAR378.9.20151203T005428Z.wav_chan0.xml	0	0
03/12/2015 1:02	AMAR378.9.20151203T010228Z.wav_chan0.xml	0	0
03/12/2015 1:10	AMAR378.9.20151203T011028Z.wav_chan0.xml	0	0
03/12/2015 1:18	AMAR378.9.20151203T011828Z.wav_chan0.xml	0	0
03/12/2015 1:26	AMAR378.9.20151203T012628Z.wav_chan0.xml	0	0
03/12/2015 1:34	AMAR378.9.20151203T013428Z.wav_chan0.xml	0	0
03/12/2015 1:42	AMAR378.9.20151203T014228Z.wav_chan0.xml	0	0
03/12/2015 1:50	AMAR378.9.20151203T015028Z.wav_chan0.xml	0	0
03/12/2015 1:58	AMAR378.9.20151203T015828Z.wav_chan0.xml	0	0
03/12/2015 2:06	AMAR378.9.20151203T020628Z.wav_chan0.xml	0	0
03/12/2015 2:14	AMAR378.9.20151203T021428Z.wav_chan0.xml	0	0
03/12/2015 2:22	AMAR378.9.20151203T022228Z.wav_chan0.xml	0	0
03/12/2015 2:30	AMAR378.9.20151203T023028Z.wav_chan0.xml	0	0
03/12/2015 2:38	AMAR378.9.20151203T023828Z.wav_chan0.xml	0	0
03/12/2015 2:46	AMAR378.9.20151203T024628Z.wav_chan0.xml	0	0
03/12/2015 2:54	AMAR378.9.20151203T025428Z.wav_chan0.xml	0	0
03/12/2015 3:02	AMAR378.9.20151203T030228Z.wav_chan0.xml	0	0
03/12/2015 3:10	AMAR378.9.20151203T031028Z.wav_chan0.xml	0	0
03/12/2015 3:18	AMAR378.9.20151203T031828Z.wav_chan0.xml	0	0
03/12/2015 3:26	AMAR378.9.20151203T032628Z.wav_chan0.xml	0	0
03/12/2015 3:34	AMAR378.9.20151203T033428Z.wav_chan0.xml	0	0
03/12/2015 3:42	AMAR378.9.20151203T034228Z.wav_chan0.xml	0	0
03/12/2015 3:50	AMAR378.9.20151203T035028Z.wav_chan0.xml	0	0
03/12/2015 3:58	AMAR378.9.20151203T035828Z.wav_chan0.xml	0	0
03/12/2015 4:06	AMAR378.9.20151203T040628Z.wav_chan0.xml	0	0
03/12/2015 4:14	AMAR378.9.20151203T041428Z.wav_chan0.xml	0	0
03/12/2015 4:22	AMAR378.9.20151203T042228Z.wav_chan0.xml	0	0
03/12/2015 4:30	AMAR378.9.20151203T043028Z.wav_chan0.xml	0	0
03/12/2015 4:38	AMAR378.9.20151203T043828Z.wav_chan0.xml	0	0
03/12/2015 4:46	AMAR378.9.20151203T044628Z.wav_chan0.xml	0	0
03/12/2015 4:54	AMAR378.9.20151203T045428Z.wav_chan0.xml	0	0
03/12/2015 5:02	AMAR378.9.20151203T050228Z.wav_chan0.xml	0	0
03/12/2015 5:10	AMAR378.9.20151203T051028Z.wav_chan0.xml	0	0
03/12/2015 5:18	AMAR378.9.20151203T051828Z.wav_chan0.xml	0	0
03/12/2015 5:26	AMAR378.9.20151203T052628Z.wav_chan0.xml	0	0
03/12/2015 5:34	AMAR378.9.20151203T053428Z.wav_chan0.xml	0	0
03/12/2015 5:42	AMAR378.9.20151203T054228Z.wav_chan0.xml	0	0
03/12/2015 5:50	AMAR378.9.20151203T055028Z.wav_chan0.xml	0	0
03/12/2015 5:58	AMAR378.9.20151203T055828Z.wav_chan0.xml	0	0
03/12/2015 6:06	AMAR378.9.20151203T060628Z.wav_chan0.xml	0	0
03/12/2015 6:14	AMAR378.9.20151203T061428Z.wav_chan0.xml	0	0
03/12/2015 6:22	AMAR378.9.20151203T062228Z.wav_chan0.xml	0	0
03/12/2015 6:30	AMAR378.9.20151203T063028Z.wav_chan0.xml	0	0
03/12/2015 6:38	AMAR378.9.20151203T063828Z.wav_chan0.xml	0	0
03/12/2015 6:46	AMAR378.9.20151203T064628Z.wav_chan0.xml	0	0
03/12/2015 6:54	AMAR378.9.20151203T065428Z.wav_chan0.xml	0	0
03/12/2015 7:02	AMAR378.9.20151203T070228Z.wav_chan0.xml	0	0
03/12/2015 7:10	AMAR378.9.20151203T071028Z.wav_chan0.xml	0	0
03/12/2015 7:18	AMAR378.9.20151203T071828Z.wav_chan0.xml	0	0
03/12/2015 7:26	AMAR378.9.20151203T072628Z.wav_chan0.xml	0	0
03/12/2015 7:34	AMAR378.9.20151203T073428Z.wav_chan0.xml	0	0
03/12/2015 7:42	AMAR378.9.20151203T074228Z.wav_chan0.xml	0	0
03/12/2015 7:50	AMAR378.9.20151203T075028Z.wav_chan0.xml	0	0
03/12/2015 7:58	AMAR378.9.20151203T075828Z.wav_chan0.xml	0	0
03/12/2015 8:06	AMAR378.9.20151203T080628Z.wav_chan0.xml	0	0
03/12/2015 8:14	AMAR378.9.20151203T081428Z.wav_chan0.xml	0	0
03/12/2015 8:22	AMAR378.9.20151203T082228Z.wav_chan0.xml	0	0
03/12/2015 8:30	AMAR378.9.20151203T083028Z.wav_chan0.xml	0	0
03/12/2015 8:38	AMAR378.9.20151203T083828Z.wav_chan0.xml	0	0
03/12/2015 8:46	AMAR378.9.20151203T084628Z.wav_chan0.xml	0	0
03/12/2015 8:54	AMAR378.9.20151203T085428Z.wav_chan0.xml	0	0
03/12/2015 9:02	AMAR378.9.20151203T090228Z.wav_chan0.xml	0	0
03/12/2015 9:10	AMAR378.9.20151203T091028Z.wav_chan0.xml	0	0
03/12/2015 9:18	AMAR378.9.20151203T091828Z.wav_chan0.xml	0	0
03/12/2015 9:26	AMAR378.9.20151203T092628Z.wav_chan0.xml	0	0
03/12/2015 9:34	AMAR378.9.20151203T093428Z.wav_chan0.xml	0	0
03/12/2015 9:42	AMAR378.9.20151203T094228Z.wav_chan0.xml	0	0
03/12/2015 9:50	AMAR378.9.20151203T095028Z.wav_chan0.xml	0	0
03/12/2015 9:58	AMAR378.9.20151203T095828Z.wav_chan0.xml	0	0
03/12/2015 10:06	AMAR378.9.20151203T100628Z.wav_chan0.xml	0	0
03/12/2015 10:14	AMAR378.9.20151203T101428Z.wav_chan0.xml	0	0
03/12/2015 10:22	AMAR378.9.20151203T102228Z.wav_chan0.xml	0	0
03/12/2015 10:30	AMAR378.9.20151203T103028Z.wav_chan0.xml	0	0
03/12/2015 10:38	AMAR378.9.20151203T103828Z.wav_chan0.xml	0	0
03/12/2015 10:46	AMAR378.9.20151203T104628Z.wav_chan0.xml	0	0
03/12/2015 10:54	AMAR378.9.20151203T105428Z.wav_chan0.xml	0	0
03/12/2015 11:02	AMAR378.9.20151203T110228Z.wav_chan0.xml	0	0
03/12/2015 11:10	AMAR378.9.20151203T111028Z.wav_chan0.xml	0	0
03/12/2015 11:18	AMAR378.9.20151203T111828Z.wav_chan0.xml	0	0
03/12/2015 11:26	AMAR378.9.20151203T112628Z.wav_chan0.xml	0	0
03/12/2015 11:34	AMAR378.9.20151203T113428Z.wav_chan0.xml	0	0
03/12/2015 11:42	AMAR378.9.20151203T114228Z.wav_chan0.xml	0	0
03/12/2015 11:50	AMAR378.9.20151203T115028Z.wav_chan0.xml	0	0
03/12/2015 11:58	AMAR378.9.20151203T115828Z.wav_chan0.xml	0	0
03/12/2015 12:06	AMAR378.9.20151203T120628Z.wav_chan0.xml	0	1
03/12/2015 12:14	AMAR378.9.20151203T121428Z.wav_chan0.xml	0	0
03/12/2015 12:22	AMAR378.9.20151203T122228Z.wav_chan0.xml	2	2
03/12/2015 12:30	AMAR378.9.20151203T123028Z.wav_chan0.xml	0	0
03/12/2015 12:38	AMAR378.9.20151203T123828Z.wav_chan0.xml	0	0
03/12/2015 12:46	AMAR378.9.20151203T124628Z.wav_chan0.xml	0	0
03/12/2015 12:54	AMAR378.9.20151203T125428Z.wav_chan0.xml	0	0
03/12/2015 13:02	AMAR378.9.20151203T130228Z.wav_chan0.xml	0	0
03/12/2015 13:10	AMAR378.9.20151203T131028Z.wav_chan0.xml	0	0
03/12/2015 13:18	AMAR378.9.20151203T131828Z.wav_chan0.xml	0	0
03/12/2015 13:26	AMAR378.9.20151203T132628Z.wav_chan0.xml	0	0
03/12/2015 13:34	AMAR378.9.20151203T133428Z.wav_chan0.xml	0	0
03/12/2015 13:42	AMAR378.9.20151203T134228Z.wav_chan0.xml	0	0
03/12/2015 13:50	AMAR378.9.20151203T135028Z.wav_chan0.xml	0	0
03/12/2015 13:58	AMAR378.9.20151203T135828Z.wav_chan0.xml	0	0
03/12/2015 14:06	AMAR378.9.20151203T140628Z.wav_chan0.xml	0	0
03/12/2015 14:14	AMAR378.9.20151203T141428Z.wav_chan0.xml	0	0
03/12/2015 14:22	AMAR378.9.20151203T142228Z.wav_chan0.xml	0	0
03/12/2015 14:30	AMAR378.9.20151203T143028Z.wav_chan0.xml	0	0
03/12/2015 14:38	AMAR378.9.20151203T143828Z.wav_chan0.xml	0	0
03/12/2015 14:46	AMAR378.9.20151203T144628Z.wav_chan0.xml	0	0
03/12/2015 14:54	AMAR378.9.20151203T145428Z.wav_chan0.xml	0	0
03/12/2015 15:02	AMAR378.9.20151203T150228Z.wav_chan0.xml	0	0
03/12/2015 15:10	AMAR378.9.20151203T151028Z.wav_chan0.xml	0	0
03/12/2015 15:18	AMAR378.9.20151203T151828Z.wav_chan0.xml	0	0
03/12/2015 15:26	AMAR378.9.20151203T152628Z.wav_chan0.xml	0	0
03/12/2015 15:34	AMAR378.9.20151203T153428Z.wav_chan0.xml	0	0
03/12/2015 15:42	AMAR378.9.20151203T154228Z.wav_chan0.xml	0	0
03/12/2015 15:50	AMAR378.9.20151203T155028Z.wav_chan0.xml	0	0
03/12/2015 15:58	AMAR378.9.20151203T155828Z.wav_chan0.xml	0	0
03/12/2015 16:06	AMAR378.9.20151203T160628Z.wav_chan0.xml	0	0
03/12/2015 16:14	AMAR378.9.20151203T161428Z.wav_chan0.xml	0	0
03/12/2015 16:22	AMAR378.9.20151203T162228Z.wav_chan0.xml	0	0
03/12/2015 16:30	AMAR378.9.20151203T163028Z.wav_chan0.xml	0	0
03/12/2015 16:38	AMAR378.9.20151203T163828Z.wav_chan0.xml	0	0
03/12/2015 16:46	AMAR378.9.20151203T164628Z.wav_chan0.xml	0	0
03/12/2015 16:54	AMAR378.9.20151203T165428Z.wav_chan0.xml	0	0
03/12/2015 17:02	AMAR378.9.20151203T170228Z.wav_chan0.xml	0	0
03/12/2015 17:10	AMAR378.9.20151203T171028Z.wav_chan0.xml	0	0
03/12/2015 17:18	AMAR378.9.20151203T171828Z.wav_chan0.xml	0	0
03/12/2015 17:26	AMAR378.9.20151203T172628Z.wav_chan0.xml	0	0
03/12/2015 17:34	AMAR378.9.20151203T173428Z.wav_chan0.xml	0	0
03/12/2015 17:42	AMAR378.9.20151203T174228Z.wav_chan0.xml	0	0
03/12/2015 17:50	AMAR378.9.20151203T175028Z.wav_chan0.xml	0	0
03/12/2015 17:58	AMAR378.9.20151203T175828Z.wav_chan0.xml	0	0
03/12/2015 18:06	AMAR378.9.20151203T180628Z.wav_chan0.xml	0	0
03/12/2015 18:14	AMAR378.9.20151203T181428Z.wav_chan0.xml	0	0
03/12/2015 18:22	AMAR378.9.20151203T182228Z.wav_chan0.xml	0	0
03/12/2015 18:30	AMAR378.9.20151203T183028Z.wav_chan0.xml	0	0
03/12/2015 18:38	AMAR378.9.20151203T183828Z.wav_chan0.xml	0	0
03/12/2015 18:46	AMAR378.9.20151203T184628Z.wav_chan0.xml	0	0
03/12/2015 18:54	AMAR378.9.20151203T185428Z.wav_chan0.xml	0	0
03/12/2015 19:02	AMAR378.9.20151203T190228Z.wav_chan0.xml	0	0
03/12/2015 19:10	AMAR378.9.20151203T191028Z.wav_chan0.xml	0	0
03/12/2015 19:18	AMAR378.9.20151203T191828Z.wav_chan0.xml	0	0
03/12/2015 19:26	AMAR378.9.20151203T192628Z.wav_chan0.xml	0	0
03/12/2015 19:34	AMAR378.9.20151203T193428Z.wav_chan0.xml	0	0
03/12/2015 19:42	AMAR378.9.20151203T194228Z.wav_chan0.xml	0	0
03/12/2015 19:50	AMAR378.9.20151203T195028Z.wav_chan0.xml	0	0
03/12/2015 19:58	AMAR378.9.20151203T195828Z.wav_chan0.xml	0	0
03/12/2015 20:06	AMAR378.9.20151203T200628Z.wav_chan0.xml	0	0
03/12/2015 20:14	AMAR378.9.20151203T201428Z.wav_chan0.xml	0	0
03/12/2015 20:22	AMAR378.9.20151203T202228Z.wav_chan0.xml	0	0
03/12/2015 20:30	AMAR378.9.20151203T203028Z.wav_chan0.xml	0	0
03/12/2015 20:38	AMAR378.9.20151203T203828Z.wav_chan0.xml	0	0
03/12/2015 20:46	AMAR378.9.20151203T204628Z.wav_chan0.xml	0	0
03/12/2015 20:54	AMAR378.9.20151203T205428Z.wav_chan0.xml	0	0
03/12/2015 21:02	AMAR378.9.20151203T210228Z.wav_chan0.xml	0	0
03/12/2015 21:10	AMAR378.9.20151203T211028Z.wav_chan0.xml	0	0
03/12/2015 21:18	AMAR378.9.20151203T211828Z.wav_chan0.xml	0	0
03/12/2015 21:26	AMAR378.9.20151203T212628Z.wav_chan0.xml	0	0
03/12/2015 21:34	AMAR378.9.20151203T213428Z.wav_chan0.xml	0	0
03/12/2015 21:42	AMAR378.9.20151203T214228Z.wav_chan0.xml	0	0
03/12/2015 21:50	AMAR378.9.20151203T215028Z.wav_chan0.xml	0	0
03/12/2015 21:58	AMAR378.9.20151203T215828Z.wav_chan0.xml	0	0
03/12/2015 22:06	AMAR378.9.20151203T220628Z.wav_chan0.xml	0	0
03/12/2015 22:14	AMAR378.9.20151203T221428Z.wav_chan0.xml	0	0
03/12/2015 22:22	AMAR378.9.20151203T222228Z.wav_chan0.xml	0	0
03/12/2015 22:30	AMAR378.9.20151203T223028Z.wav_chan0.xml	0	0
03/12/2015 22:38	AMAR378.9.20151203T223828Z.wav_chan0.xml	0	0
03/12/2015 22:46	AMAR378.9.20151203T224628Z.wav_chan0.xml	0	0
03/12/2015 22:54	AMAR378.9.20151203T225428Z.wav_chan0.xml	0	0
03/12/2015 23:02	AMAR378.9.20151203T230228Z.wav_chan0.xml	0	0
03/12/2015 23:10	AMAR378.9.20151203T231028Z.wav_chan0.xml	0	0
03/12/2015 23:18	AMAR378.9.20151203T231828Z.wav_chan0.xml	0	0
03/12/2015 23:26	AMAR378.9.20151203T232628Z.wav_chan0.xml	0	0
03/12/2015 23:34	AMAR378.9.20151203T233428Z.wav_chan0.xml	0	0
03/12/2015 23:42	AMAR378.9.20151203T234228Z.wav_chan0.xml	0	0
03/12/2015 23:50	AMAR378.9.20151203T235028Z.wav_chan0.xml	0	0
03/12/2015 23:58	AMAR378.9.20151203T235828Z.wav_chan0.xml	0	0
03/11/2015 0:06	AMAR378.9.20151103T000628Z.wav_chan0.xml	0	0
03/11/2015 0:14	AMAR378.9.20151103T001428Z.wav_chan0.xml	0	0
03/11/2015 0:22	AMAR378.9.20151103T002228Z.wav_chan0.xml	0	0
03/11/2015 0:30	AMAR378.9.20151103T003028Z.wav_chan0.xml	0	0
03/11/2015 0:38	AMAR378.9.20151103T003828Z.wav_chan0.xml	0	0
03/11/2015 0:46	AMAR378.9.20151103T004628Z.wav_chan0.xml	0	0
03/11/2015 0:54	AMAR378.9.20151103T005428Z.wav_chan0.xml	0	0
03/11/2015 1:02	AMAR378.9.20151103T010228Z.wav_chan0.xml	0	0
03/11/2015 1:10	AMAR378.9.20151103T011028Z.wav_chan0.xml	0	0
03/11/2015 1:18	AMAR378.9.20151103T011828Z.wav_chan0.xml	0	0
03/11/2015 1:26	AMAR378.9.20151103T012628Z.wav_chan0.xml	0	0
03/11/2015 1:34	AMAR378.9.20151103T013428Z.wav_chan0.xml	0	0
03/11/2015 1:42	AMAR378.9.20151103T014228Z.wav_chan0.xml	0	0
03/11/2015 1:50	AMAR378.9.20151103T015028Z.wav_chan0.xml	0	0
03/11/2015 1:58	AMAR378.9.20151103T015828Z.wav_chan0.xml	0	0
03/11/2015 2:06	AMAR378.9.20151103T020628Z.wav_chan0.xml	0	0
03/11/2015 2:14	AMAR378.9.20151103T021428Z.wav_chan0.xml	0	0
03/11/2015 2:22	AMAR378.9.20151103T022228Z.wav_chan0.xml	0	0
03/11/2015 2:30	AMAR378.9.20151103T023028Z.wav_chan0.xml	0	0
03/11/2015 2:38	AMAR378.9.20151103T023828Z.wav_chan0.xml	0	0
03/11/2015 2:46	AMAR378.9.20151103T024628Z.wav_chan0.xml	0	0
03/11/2015 2:54	AMAR378.9.20151103T025428Z.wav_chan0.xml	0	0
03/11/2015 3:02	AMAR378.9.20151103T030228Z.wav_chan0.xml	0	0
03/11/2015 3:10	AMAR378.9.20151103T031028Z.wav_chan0.xml	0	0
03/11/2015 3:18	AMAR378.9.20151103T031828Z.wav_chan0.xml	0	0
03/11/2015 3:26	AMAR378.9.20151103T032628Z.wav_chan0.xml	0	0
03/11/2015 3:34	AMAR378.9.20151103T033428Z.wav_chan0.xml	0	0
03/11/2015 3:42	AMAR378.9.20151103T034228Z.wav_chan0.xml	0	0
03/11/2015 3:50	AMAR378.9.20151103T035028Z.wav_chan0.xml	0	0
03/11/2015 3:58	AMAR378.9.20151103T035828Z.wav_chan0.xml	0	0
03/11/2015 4:06	AMAR378.9.20151103T040628Z.wav_chan0.xml	0	0
03/11/2015 4:14	AMAR378.9.20151103T041428Z.wav_chan0.xml	0	0
03/11/2015 4:22	AMAR378.9.20151103T042228Z.wav_chan0.xml	0	0
03/11/2015 4:30	AMAR378.9.20151103T043028Z.wav_chan0.xml	0	0
03/11/2015 4:38	AMAR378.9.20151103T043828Z.wav_chan0.xml	0	0
03/11/2015 4:46	AMAR378.9.20151103T044628Z.wav_chan0.xml	0	0
03/11/2015 4:54	AMAR378.9.20151103T045428Z.wav_chan0.xml	0	0
03/11/2015 5:02	AMAR378.9.20151103T050228Z.wav_chan0.xml	0	0
03/11/2015 5:10	AMAR378.9.20151103T051028Z.wav_chan0.xml	0	0
03/11/2015 5:18	AMAR378.9.20151103T051828Z.wav_chan0.xml	0	0
03/11/2015 5:26	AMAR378.9.20151103T052628Z.wav_chan0.xml	0	0
03/11/2015 5:34	AMAR378.9.20151103T053428Z.wav_chan0.xml	0	0
03/11/2015 5:42	AMAR378.9.20151103T054228Z.wav_chan0.xml	0	0
03/11/2015 5:50	AMAR378.9.20151103T055028Z.wav_chan0.xml	0	0
03/11/2015 5:58	AMAR378.9.20151103T055828Z.wav_chan0.xml	0	0
03/11/2015 6:06	AMAR378.9.20151103T060628Z.wav_chan0.xml	0	0
03/11/2015 6:14	AMAR378.9.20151103T061428Z.wav_chan0.xml	0	0
03/11/2015 6:22	AMAR378.9.20151103T062228Z.wav_chan0.xml	0	0
03/11/2015 6:30	AMAR378.9.20151103T063028Z.wav_chan0.xml	0	0
03/11/2015 6:38	AMAR378.9.20151103T063828Z.wav_chan0.xml	0	0
03/11/2015 6:46	AMAR378.9.20151103T064628Z.wav_chan0.xml	0	0
03/11/2015 6:54	AMAR378.9.20151103T065428Z.wav_chan0.xml	0	0
03/11/2015 7:02	AMAR378.9.20151103T070228Z.wav_chan0.xml	0	0
03/11/2015 7:10	AMAR378.9.20151103T071028Z.wav_chan0.xml	0	0
03/11/2015 7:18	AMAR378.9.20151103T071828Z.wav_chan0.xml	0	0
03/11/2015 7:26	AMAR378.9.20151103T072628Z.wav_chan0.xml	0	0
03/11/2015 7:34	AMAR378.9.20151103T073428Z.wav_chan0.xml	0	0
03/11/2015 7:42	AMAR378.9.20151103T074228Z.wav_chan0.xml	0	0
03/11/2015 7:50	AMAR378.9.20151103T075028Z.wav_chan0.xml	0	0
03/11/2015 7:58	AMAR378.9.20151103T075828Z.wav_chan0.xml	0	0
03/11/2015 8:06	AMAR378.9.20151103T080628Z.wav_chan0.xml	0	0
03/11/2015 8:14	AMAR378.9.20151103T081428Z.wav_chan0.xml	0	0
03/11/2015 8:22	AMAR378.9.20151103T082228Z.wav_chan0.xml	0	0
03/11/2015 8:30	AMAR378.9.20151103T083028Z.wav_chan0.xml	0	0
03/11/2015 8:38	AMAR378.9.20151103T083828Z.wav_chan0.xml	0	0
03/11/2015 8:46	AMAR378.9.20151103T084628Z.wav_chan0.xml	0	0
03/11/2015 8:54	AMAR378.9.20151103T085428Z.wav_chan0.xml	0	0
03/11/2015 9:02	AMAR378.9.20151103T090228Z.wav_chan0.xml	0	0
03/11/2015 9:10	AMAR378.9.20151103T091028Z.wav_chan0.xml	0	0
03/11/2015 9:18	AMAR378.9.20151103T091828Z.wav_chan0.xml	0	0
03/11/2015 9:26	AMAR378.9.20151103T092628Z.wav_chan0.xml	0	0
03/11/2015 9:34	AMAR378.9.20151103T093428Z.wav_chan0.xml	0	0
03/11/2015 9:42	AMAR378.9.20151103T094228Z.wav_chan0.xml	0	0
03/11/2015 9:50	AMAR378.9.20151103T095028Z.wav_chan0.xml	0	0
03/11/2015 9:58	AMAR378.9.20151103T095828Z.wav_chan0.xml	0	0
03/11/2015 10:06	AMAR378.9.20151103T100628Z.wav_chan0.xml	0	0
03/11/2015 10:14	AMAR378.9.20151103T101428Z.wav_chan0.xml	0	0
03/11/2015 10:22	AMAR378.9.20151103T102228Z.wav_chan0.xml	0	0
03/11/2015 10:30	AMAR378.9.20151103T103028Z.wav_chan0.xml	0	0
03/11/2015 10:38	AMAR378.9.20151103T103828Z.wav_chan0.xml	0	0
03/11/2015 10:46	AMAR378.9.20151103T104628Z.wav_chan0.xml	0	0
03/11/2015 10:54	AMAR378.9.20151103T105428Z.wav_chan0.xml	0	0
03/11/2015 11:02	AMAR378.9.20151103T110228Z.wav_chan0.xml	0	0
03/11/2015 11:10	AMAR378.9.20151103T111028Z.wav_chan0.xml	0	0
03/11/2015 11:18	AMAR378.9.20151103T111828Z.wav_chan0.xml	0	0
03/11/2015 11:26	AMAR378.9.20151103T112628Z.wav_chan0.xml	0	0
03/11/2015 11:34	AMAR378.9.20151103T113428Z.wav_chan0.xml	0	0
03/11/2015 11:42	AMAR378.9.20151103T114228Z.wav_chan0.xml	0	0
03/11/2015 11:50	AMAR378.9.20151103T115028Z.wav_chan0.xml	0	0
03/11/2015 11:58	AMAR378.9.20151103T115828Z.wav_chan0.xml	0	0
03/11/2015 12:06	AMAR378.9.20151103T120628Z.wav_chan0.xml	0	0
03/11/2015 12:14	AMAR378.9.20151103T121428Z.wav_chan0.xml	0	0
03/11/2015 12:22	AMAR378.9.20151103T122228Z.wav_chan0.xml	0	0
03/11/2015 12:30	AMAR378.9.20151103T123028Z.wav_chan0.xml	0	0
03/11/2015 12:38	AMAR378.9.20151103T123828Z.wav_chan0.xml	0	0
03/11/2015 12:46	AMAR378.9.20151103T124628Z.wav_chan0.xml	0	0
03/11/2015 12:54	AMAR378.9.20151103T125428Z.wav_chan0.xml	0	0
03/11/2015 13:02	AMAR378.9.20151103T130228Z.wav_chan0.xml	0	0
03/11/2015 13:10	AMAR378.9.20151103T131028Z.wav_chan0.xml	0	0
03/11/2015 13:18	AMAR378.9.20151103T131828Z.wav_chan0.xml	0	0
03/11/2015 13:26	AMAR378.9.20151103T132628Z.wav_chan0.xml	0	0
03/11/2015 13:34	AMAR378.9.20151103T133428Z.wav_chan0.xml	0	0
03/11/2015 13:42	AMAR378.9.20151103T134228Z.wav_chan0.xml	0	0
03/11/2015 13:50	AMAR378.9.20151103T135028Z.wav_chan0.xml	0	0
03/11/2015 13:58	AMAR378.9.20151103T135828Z.wav_chan0.xml	0	0
03/11/2015 14:06	AMAR378.9.20151103T140628Z.wav_chan0.xml	0	0
03/11/2015 14:14	AMAR378.9.20151103T141428Z.wav_chan0.xml	0	0
03/11/2015 14:22	AMAR378.9.20151103T142228Z.wav_chan0.xml	0	0
03/11/2015 14:30	AMAR378.9.20151103T143028Z.wav_chan0.xml	0	0
03/11/2015 14:38	AMAR378.9.20151103T143828Z.wav_chan0.xml	0	0
03/11/2015 14:46	AMAR378.9.20151103T144628Z.wav_chan0.xml	0	0
03/11/2015 14:54	AMAR378.9.20151103T145428Z.wav_chan0.xml	0	0
03/11/2015 15:02	AMAR378.9.20151103T150228Z.wav_chan0.xml	0	0
03/11/2015 15:10	AMAR378.9.20151103T151028Z.wav_chan0.xml	0	0
03/11/2015 15:18	AMAR378.9.20151103T151828Z.wav_chan0.xml	0	0
03/11/2015 15:26	AMAR378.9.20151103T152628Z.wav_chan0.xml	0	0
03/11/2015 15:34	AMAR378.9.20151103T153428Z.wav_chan0.xml	0	0
03/11/2015 15:42	AMAR378.9.20151103T154228Z.wav_chan0.xml	0	0
03/11/2015 15:50	AMAR378.9.20151103T155028Z.wav_chan0.xml	0	0
03/11/2015 15:58	AMAR378.9.20151103T155828Z.wav_chan0.xml	0	0
03/11/2015 16:06	AMAR378.9.20151103T160628Z.wav_chan0.xml	0	0
03/11/2015 16:14	AMAR378.9.20151103T161428Z.wav_chan0.xml	0	0
03/11/2015 16:22	AMAR378.9.20151103T162228Z.wav_chan0.xml	0	0
03/11/2015 16:30	AMAR378.9.20151103T163028Z.wav_chan0.xml	0	0
03/11/2015 16:38	AMAR378.9.20151103T163828Z.wav_chan0.xml	0	0
03/11/2015 16:46	AMAR378.9.20151103T164628Z.wav_chan0.xml	0	0
03/11/2015 16:54	AMAR378.9.20151103T165428Z.wav_chan0.xml	0	0
03/11/2015 17:02	AMAR378.9.20151103T170228Z.wav_chan0.xml	0	0
03/11/2015 17:10	AMAR378.9.20151103T171028Z.wav_chan0.xml	0	0
03/11/2015 17:18	AMAR378.9.20151103T171828Z.wav_chan0.xml	0	0
03/11/2015 17:26	AMAR378.9.20151103T172628Z.wav_chan0.xml	0	0
03/11/2015 17:34	AMAR378.9.20151103T173428Z.wav_chan0.xml	0	0
03/11/2015 17:42	AMAR378.9.20151103T174228Z.wav_chan0.xml	0	0
03/11/2015 17:50	AMAR378.9.20151103T175028Z.wav_chan0.xml	0	0
03/11/2015 17:58	AMAR378.9.20151103T175828Z.wav_chan0.xml	0	0
03/11/2015 18:06	AMAR378.9.20151103T180628Z.wav_chan0.xml	0	0
03/11/2015 18:14	AMAR378.9.20151103T181428Z.wav_chan0.xml	0	0
03/11/2015 18:22	AMAR378.9.20151103T182228Z.wav_chan0.xml	0	0
03/11/2015 18:30	AMAR378.9.20151103T183028Z.wav_chan0.xml	0	0
03/11/2015 18:38	AMAR378.9.20151103T183828Z.wav_chan0.xml	0	0
03/11/2015 18:46	AMAR378.9.20151103T184628Z.wav_chan0.xml	0	0
03/11/2015 18:54	AMAR378.9.20151103T185428Z.wav_chan0.xml	0	0
03/11/2015 19:02	AMAR378.9.20151103T190228Z.wav_chan0.xml	0	0
03/11/2015 19:10	AMAR378.9.20151103T191028Z.wav_chan0.xml	0	0
03/11/2015 19:18	AMAR378.9.20151103T191828Z.wav_chan0.xml	0	0
03/11/2015 19:26	AMAR378.9.20151103T192628Z.wav_chan0.xml	0	0
03/11/2015 19:34	AMAR378.9.20151103T193428Z.wav_chan0.xml	0	0
03/11/2015 19:42	AMAR378.9.20151103T194228Z.wav_chan0.xml	0	0
03/11/2015 19:50	AMAR378.9.20151103T195028Z.wav_chan0.xml	0	0
03/11/2015 19:58	AMAR378.9.20151103T195828Z.wav_chan0.xml	0	0
03/11/2015 20:06	AMAR378.9.20151103T200628Z.wav_chan0.xml	0	0
03/11/2015 20:14	AMAR378.9.20151103T201428Z.wav_chan0.xml	0	0
03/11/2015 20:22	AMAR378.9.20151103T202228Z.wav_chan0.xml	0	0
03/11/2015 20:30	AMAR378.9.20151103T203028Z.wav_chan0.xml	0	0
03/11/2015 20:38	AMAR378.9.20151103T203828Z.wav_chan0.xml	0	0
03/11/2015 20:46	AMAR378.9.20151103T204628Z.wav_chan0.xml	0	0
03/11/2015 20:54	AMAR378.9.20151103T205428Z.wav_chan0.xml	0	0
03/11/2015 21:02	AMAR378.9.20151103T210228Z.wav_chan0.xml	0	0
03/11/2015 21:10	AMAR378.9.20151103T211028Z.wav_chan0.xml	0	0
03/11/2015 21:18	AMAR378.9.20151103T211828Z.wav_chan0.xml	0	0
03/11/2015 21:26	AMAR378.9.20151103T212628Z.wav_chan0.xml	0	0
03/11/2015 21:34	AMAR378.9.20151103T213428Z.wav_chan0.xml	0	0
03/11/2015 21:42	AMAR378.9.20151103T214228Z.wav_chan0.xml	0	0
03/11/2015 21:50	AMAR378.9.20151103T215028Z.wav_chan0.xml	0	0
03/11/2015 21:58	AMAR378.9.20151103T215828Z.wav_chan0.xml	0	0
03/11/2015 22:06	AMAR378.9.20151103T220628Z.wav_chan0.xml	0	0
03/11/2015 22:14	AMAR378.9.20151103T221428Z.wav_chan0.xml	0	0
03/11/2015 22:22	AMAR378.9.20151103T222228Z.wav_chan0.xml	0	0
03/11/2015 22:30	AMAR378.9.20151103T223028Z.wav_chan0.xml	0	0
03/11/2015 22:38	AMAR378.9.20151103T223828Z.wav_chan0.xml	0	0
03/11/2015 22:46	AMAR378.9.20151103T224628Z.wav_chan0.xml	0	0
03/11/2015 22:54	AMAR378.9.20151103T225428Z.wav_chan0.xml	0	0
03/11/2015 23:02	AMAR378.9.20151103T230228Z.wav_chan0.xml	0	0
03/11/2015 23:10	AMAR378.9.20151103T231028Z.wav_chan0.xml	0	0
03/11/2015 23:18	AMAR378.9.20151103T231828Z.wav_chan0.xml	0	0
03/11/2015 23:26	AMAR378.9.20151103T232628Z.wav_chan0.xml	0	0
03/11/2015 23:34	AMAR378.9.20151103T233428Z.wav_chan0.xml	0	0
03/11/2015 23:42	AMAR378.9.20151103T234228Z.wav_chan0.xml	0	0
03/11/2015 23:50	AMAR378.9.20151103T235028Z.wav_chan0.xml	0	0
03/11/2015 23:58	AMAR378.9.20151103T235828Z.wav_chan0.xml	0	0
03/10/2015 0:06	AMAR378.9.20151003T000628Z.wav_chan0.xml	0	0
03/10/2015 0:14	AMAR378.9.20151003T001428Z.wav_chan0.xml	0	0
03/10/2015 0:22	AMAR378.9.20151003T002228Z.wav_chan0.xml	0	0
03/10/2015 0:30	AMAR378.9.20151003T003028Z.wav_chan0.xml	0	0
03/10/2015 0:38	AMAR378.9.20151003T003828Z.wav_chan0.xml	0	0
03/10/2015 0:46	AMAR378.9.20151003T004628Z.wav_chan0.xml	0	0
03/10/2015 0:54	AMAR378.9.20151003T005428Z.wav_chan0.xml	0	0
03/10/2015 1:02	AMAR378.9.20151003T010228Z.wav_chan0.xml	0	0
03/10/2015 1:10	AMAR378.9.20151003T011028Z.wav_chan0.xml	0	0
03/10/2015 1:18	AMAR378.9.20151003T011828Z.wav_chan0.xml	0	0
03/10/2015 1:26	AMAR378.9.20151003T012628Z.wav_chan0.xml	0	0
03/10/2015 1:34	AMAR378.9.20151003T013428Z.wav_chan0.xml	0	0
03/10/2015 1:42	AMAR378.9.20151003T014228Z.wav_chan0.xml	0	0
03/10/2015 1:50	AMAR378.9.20151003T015028Z.wav_chan0.xml	0	0
03/10/2015 1:58	AMAR378.9.20151003T015828Z.wav_chan0.xml	0	0
03/10/2015 2:06	AMAR378.9.20151003T020628Z.wav_chan0.xml	0	0
03/10/2015 2:14	AMAR378.9.20151003T021428Z.wav_chan0.xml	0	0
03/10/2015 2:22	AMAR378.9.20151003T022228Z.wav_chan0.xml	0	0
03/10/2015 2:30	AMAR378.9.20151003T023028Z.wav_chan0.xml	0	0
03/10/2015 2:38	AMAR378.9.20151003T023828Z.wav_chan0.xml	0	0
03/10/2015 2:46	AMAR378.9.20151003T024628Z.wav_chan0.xml	0	0
03/10/2015 2:54	AMAR378.9.20151003T025428Z.wav_chan0.xml	0	0
03/10/2015 3:02	AMAR378.9.20151003T030228Z.wav_chan0.xml	0	0
03/10/2015 3:10	AMAR378.9.20151003T031028Z.wav_chan0.xml	0	0
03/10/2015 3:18	AMAR378.9.20151003T031828Z.wav_chan0.xml	0	0
03/10/2015 3:26	AMAR378.9.20151003T032628Z.wav_chan0.xml	0	0
03/10/2015 3:34	AMAR378.9.20151003T033428Z.wav_chan0.xml	0	0
03/10/2015 3:42	AMAR378.9.20151003T034228Z.wav_chan0.xml	0	0
03/10/2015 3:50	AMAR378.9.20151003T035028Z.wav_chan0.xml	0	0
03/10/2015 3:58	AMAR378.9.20151003T035828Z.wav_chan0.xml	0	0
03/10/2015 4:06	AMAR378.9.20151003T040628Z.wav_chan0.xml	0	0
03/10/2015 4:14	AMAR378.9.20151003T041428Z.wav_chan0.xml	0	0
03/10/2015 4:22	AMAR378.9.20151003T042228Z.wav_chan0.xml	0	0
03/10/2015 4:30	AMAR378.9.20151003T043028Z.wav_chan0.xml	0	0
03/10/2015 4:38	AMAR378.9.20151003T043828Z.wav_chan0.xml	0	0
03/10/2015 4:46	AMAR378.9.20151003T044628Z.wav_chan0.xml	0	0
03/10/2015 4:54	AMAR378.9.20151003T045428Z.wav_chan0.xml	0	0
03/10/2015 5:02	AMAR378.9.20151003T050228Z.wav_chan0.xml	0	0
03/10/2015 5:10	AMAR378.9.20151003T051028Z.wav_chan0.xml	0	0
03/10/2015 5:18	AMAR378.9.20151003T051828Z.wav_chan0.xml	0	0
03/10/2015 5:26	AMAR378.9.20151003T052628Z.wav_chan0.xml	0	0
03/10/2015 5:34	AMAR378.9.20151003T053428Z.wav_chan0.xml	0	0
03/10/2015 5:42	AMAR378.9.20151003T054228Z.wav_chan0.xml	0	0
03/10/2015 5:50	AMAR378.9.20151003T055028Z.wav_chan0.xml	0	0
03/10/2015 5:58	AMAR378.9.20151003T055828Z.wav_chan0.xml	0	0
03/10/2015 6:06	AMAR378.9.20151003T060628Z.wav_chan0.xml	0	0
03/10/2015 6:14	AMAR378.9.20151003T061428Z.wav_chan0.xml	0	0
03/10/2015 6:22	AMAR378.9.20151003T062228Z.wav_chan0.xml	0	0
03/10/2015 6:30	AMAR378.9.20151003T063028Z.wav_chan0.xml	0	0
03/10/2015 6:38	AMAR378.9.20151003T063828Z.wav_chan0.xml	0	0
03/10/2015 6:46	AMAR378.9.20151003T064628Z.wav_chan0.xml	0	0
03/10/2015 6:54	AMAR378.9.20151003T065428Z.wav_chan0.xml	0	0
03/10/2015 7:02	AMAR378.9.20151003T070228Z.wav_chan0.xml	0	0
03/10/2015 7:10	AMAR378.9.20151003T071028Z.wav_chan0.xml	0	0
03/10/2015 7:18	AMAR378.9.20151003T071828Z.wav_chan0.xml	0	0
03/10/2015 7:26	AMAR378.9.20151003T072628Z.wav_chan0.xml	0	0
03/10/2015 7:34	AMAR378.9.20151003T073428Z.wav_chan0.xml	0	0
03/10/2015 7:42	AMAR378.9.20151003T074228Z.wav_chan0.xml	0	0
03/10/2015 7:50	AMAR378.9.20151003T075028Z.wav_chan0.xml	0	0
03/10/2015 7:58	AMAR378.9.20151003T075828Z.wav_chan0.xml	0	0
03/10/2015 8:06	AMAR378.9.20151003T080628Z.wav_chan0.xml	0	0
03/10/2015 8:14	AMAR378.9.20151003T081428Z.wav_chan0.xml	0	0
03/10/2015 8:22	AMAR378.9.20151003T082228Z.wav_chan0.xml	0	0
03/10/2015 8:30	AMAR378.9.20151003T083028Z.wav_chan0.xml	0	0
03/10/2015 8:38	AMAR378.9.20151003T083828Z.wav_chan0.xml	0	0
03/10/2015 8:46	AMAR378.9.20151003T084628Z.wav_chan0.xml	0	0
03/10/2015 8:54	AMAR378.9.20151003T085428Z.wav_chan0.xml	0	0
03/10/2015 9:02	AMAR378.9.20151003T090228Z.wav_chan0.xml	0	0
03/10/2015 9:10	AMAR378.9.20151003T091028Z.wav_chan0.xml	0	0
03/10/2015 9:18	AMAR378.9.20151003T091828Z.wav_chan0.xml	0	0
03/10/2015 9:26	AMAR378.9.20151003T092628Z.wav_chan0.xml	0	0
03/10/2015 9:34	AMAR378.9.20151003T093428Z.wav_chan0.xml	0	0
03/10/2015 9:42	AMAR378.9.20151003T094228Z.wav_chan0.xml	0	0
03/10/2015 9:50	AMAR378.9.20151003T095028Z.wav_chan0.xml	0	0
03/10/2015 9:58	AMAR378.9.20151003T095828Z.wav_chan0.xml	0	0
03/10/2015 10:06	AMAR378.9.20151003T100628Z.wav_chan0.xml	0	0
03/10/2015 10:14	AMAR378.9.20151003T101428Z.wav_chan0.xml	0	0
03/10/2015 10:22	AMAR378.9.20151003T102228Z.wav_chan0.xml	0	0
03/10/2015 10:30	AMAR378.9.20151003T103028Z.wav_chan0.xml	0	0
03/10/2015 10:38	AMAR378.9.20151003T103828Z.wav_chan0.xml	0	0
03/10/2015 10:46	AMAR378.9.20151003T104628Z.wav_chan0.xml	0	0
03/10/2015 10:54	AMAR378.9.20151003T105428Z.wav_chan0.xml	0	0
03/10/2015 11:02	AMAR378.9.20151003T110228Z.wav_chan0.xml	0	0
03/10/2015 11:10	AMAR378.9.20151003T111028Z.wav_chan0.xml	0	0
03/10/2015 11:18	AMAR378.9.20151003T111828Z.wav_chan0.xml	0	0
03/10/2015 11:26	AMAR378.9.20151003T112628Z.wav_chan0.xml	0	0
03/10/2015 11:34	AMAR378.9.20151003T113428Z.wav_chan0.xml	0	0
03/10/2015 11:42	AMAR378.9.20151003T114228Z.wav_chan0.xml	0	0
03/10/2015 11:50	AMAR378.9.20151003T115028Z.wav_chan0.xml	0	0
03/10/2015 11:58	AMAR378.9.20151003T115828Z.wav_chan0.xml	0	0
03/10/2015 12:06	AMAR378.9.20151003T120628Z.wav_chan0.xml	0	0
03/10/2015 12:14	AMAR378.9.20151003T121428Z.wav_chan0.xml	0	0
03/10/2015 12:22	AMAR378.9.20151003T122228Z.wav_chan0.xml	0	0
03/10/2015 12:30	AMAR378.9.20151003T123028Z.wav_chan0.xml	0	0
03/10/2015 12:38	AMAR378.9.20151003T123828Z.wav_chan0.xml	0	0
03/10/2015 12:46	AMAR378.9.20151003T124628Z.wav_chan0.xml	0	0
03/10/2015 12:54	AMAR378.9.20151003T125428Z.wav_chan0.xml	0	0
03/10/2015 13:02	AMAR378.9.20151003T130228Z.wav_chan0.xml	0	0
03/10/2015 13:10	AMAR378.9.20151003T131028Z.wav_chan0.xml	0	0
03/10/2015 13:18	AMAR378.9.20151003T131828Z.wav_chan0.xml	0	0
03/10/2015 13:26	AMAR378.9.20151003T132628Z.wav_chan0.xml	0	0
03/10/2015 13:34	AMAR378.9.20151003T133428Z.wav_chan0.xml	0	0
03/10/2015 13:42	AMAR378.9.20151003T134228Z.wav_chan0.xml	0	0
03/10/2015 13:50	AMAR378.9.20151003T135028Z.wav_chan0.xml	0	0
03/10/2015 13:58	AMAR378.9.20151003T135828Z.wav_chan0.xml	0	0
03/10/2015 14:06	AMAR378.9.20151003T140628Z.wav_chan0.xml	0	0
03/10/2015 14:14	AMAR378.9.20151003T141428Z.wav_chan0.xml	0	0
03/10/2015 14:22	AMAR378.9.20151003T142228Z.wav_chan0.xml	0	0
03/10/2015 14:30	AMAR378.9.20151003T143028Z.wav_chan0.xml	0	0
03/10/2015 14:38	AMAR378.9.20151003T143828Z.wav_chan0.xml	0	0
03/10/2015 14:46	AMAR378.9.20151003T144628Z.wav_chan0.xml	0	0
03/10/2015 14:54	AMAR378.9.20151003T145428Z.wav_chan0.xml	0	0
03/10/2015 15:02	AMAR378.9.20151003T150228Z.wav_chan0.xml	0	0
03/10/2015 15:10	AMAR378.9.20151003T151028Z.wav_chan0.xml	0	0
03/10/2015 15:18	AMAR378.9.20151003T151828Z.wav_chan0.xml	0	0
03/10/2015 15:26	AMAR378.9.20151003T152628Z.wav_chan0.xml	0	0
03/10/2015 15:34	AMAR378.9.20151003T153428Z.wav_chan0.xml	0	0
03/10/2015 15:42	AMAR378.9.20151003T154228Z.wav_chan0.xml	0	0
03/10/2015 15:50	AMAR378.9.20151003T155028Z.wav_chan0.xml	0	0
03/10/2015 15:58	AMAR378.9.20151003T155828Z.wav_chan0.xml	0	0
03/10/2015 16:06	AMAR378.9.20151003T160628Z.wav_chan0.xml	0	0
03/10/2015 16:14	AMAR378.9.20151003T161428Z.wav_chan0.xml	0	0
03/10/2015 16:22	AMAR378.9.20151003T162228Z.wav_chan0.xml	0	0
03/10/2015 16:30	AMAR378.9.20151003T163028Z.wav_chan0.xml	0	0
03/10/2015 16:38	AMAR378.9.20151003T163828Z.wav_chan0.xml	0	0
03/10/2015 16:46	AMAR378.9.20151003T164628Z.wav_chan0.xml	0	0
03/10/2015 16:54	AMAR378.9.20151003T165428Z.wav_chan0.xml	0	0
03/10/2015 17:02	AMAR378.9.20151003T170228Z.wav_chan0.xml	0	0
03/10/2015 17:10	AMAR378.9.20151003T171028Z.wav_chan0.xml	0	0
03/10/2015 17:18	AMAR378.9.20151003T171828Z.wav_chan0.xml	0	0
03/10/2015 17:26	AMAR378.9.20151003T172628Z.wav_chan0.xml	0	1
03/10/2015 17:34	AMAR378.9.20151003T173428Z.wav_chan0.xml	0	0
03/10/2015 17:42	AMAR378.9.20151003T174228Z.wav_chan0.xml	0	0
03/10/2015 17:50	AMAR378.9.20151003T175028Z.wav_chan0.xml	0	0
03/10/2015 17:58	AMAR378.9.20151003T175828Z.wav_chan0.xml	0	0
03/10/2015 18:06	AMAR378.9.20151003T180628Z.wav_chan0.xml	0	0
03/10/2015 18:14	AMAR378.9.20151003T181428Z.wav_chan0.xml	0	0
03/10/2015 18:22	AMAR378.9.20151003T182228Z.wav_chan0.xml	0	0
03/10/2015 18:30	AMAR378.9.20151003T183028Z.wav_chan0.xml	0	0
03/10/2015 18:38	AMAR378.9.20151003T183828Z.wav_chan0.xml	0	0
03/10/2015 18:46	AMAR378.9.20151003T184628Z.wav_chan0.xml	0	0
03/10/2015 18:54	AMAR378.9.20151003T185428Z.wav_chan0.xml	0	0
03/10/2015 19:02	AMAR378.9.20151003T190228Z.wav_chan0.xml	0	0
03/10/2015 19:10	AMAR378.9.20151003T191028Z.wav_chan0.xml	0	0
03/10/2015 19:18	AMAR378.9.20151003T191828Z.wav_chan0.xml	0	0
03/10/2015 19:26	AMAR378.9.20151003T192628Z.wav_chan0.xml	0	0
03/10/2015 19:34	AMAR378.9.20151003T193428Z.wav_chan0.xml	0	0
03/10/2015 19:42	AMAR378.9.20151003T194228Z.wav_chan0.xml	0	0
03/10/2015 19:50	AMAR378.9.20151003T195028Z.wav_chan0.xml	0	0
03/10/2015 19:58	AMAR378.9.20151003T195828Z.wav_chan0.xml	0	0
03/10/2015 20:06	AMAR378.9.20151003T200628Z.wav_chan0.xml	0	0
03/10/2015 20:14	AMAR378.9.20151003T201428Z.wav_chan0.xml	0	0
03/10/2015 20:22	AMAR378.9.20151003T202228Z.wav_chan0.xml	0	0
03/10/2015 20:30	AMAR378.9.20151003T203028Z.wav_chan0.xml	0	0
03/10/2015 20:38	AMAR378.9.20151003T203828Z.wav_chan0.xml	0	0
03/10/2015 20:46	AMAR378.9.20151003T204628Z.wav_chan0.xml	0	0
03/10/2015 20:54	AMAR378.9.20151003T205428Z.wav_chan0.xml	0	0
03/10/2015 21:02	AMAR378.9.20151003T210228Z.wav_chan0.xml	0	0
03/10/2015 21:10	AMAR378.9.20151003T211028Z.wav_chan0.xml	0	0
03/10/2015 21:18	AMAR378.9.20151003T211828Z.wav_chan0.xml	0	0
03/10/2015 21:26	AMAR378.9.20151003T212628Z.wav_chan0.xml	0	0
03/10/2015 21:34	AMAR378.9.20151003T213428Z.wav_chan0.xml	0	0
03/10/2015 21:42	AMAR378.9.20151003T214228Z.wav_chan0.xml	0	0
03/10/2015 21:50	AMAR378.9.20151003T215028Z.wav_chan0.xml	0	0
03/10/2015 21:58	AMAR378.9.20151003T215828Z.wav_chan0.xml	0	0
03/10/2015 22:06	AMAR378.9.20151003T220628Z.wav_chan0.xml	0	0
03/10/2015 22:14	AMAR378.9.20151003T221428Z.wav_chan0.xml	0	0
03/10/2015 22:22	AMAR378.9.20151003T222228Z.wav_chan0.xml	0	0
03/10/2015 22:30	AMAR378.9.20151003T223028Z.wav_chan0.xml	0	0
03/10/2015 22:38	AMAR378.9.20151003T223828Z.wav_chan0.xml	0	0
03/10/2015 22:46	AMAR378.9.20151003T224628Z.wav_chan0.xml	0	0
03/10/2015 22:54	AMAR378.9.20151003T225428Z.wav_chan0.xml	0	0
03/10/2015 23:02	AMAR378.9.20151003T230228Z.wav_chan0.xml	0	0
03/10/2015 23:10	AMAR378.9.20151003T231028Z.wav_chan0.xml	0	0
03/10/2015 23:18	AMAR378.9.20151003T231828Z.wav_chan0.xml	0	0
03/10/2015 23:26	AMAR378.9.20151003T232628Z.wav_chan0.xml	0	0
03/10/2015 23:34	AMAR378.9.20151003T233428Z.wav_chan0.xml	0	0
03/10/2015 23:42	AMAR378.9.20151003T234228Z.wav_chan0.xml	0	0
03/10/2015 23:50	AMAR378.9.20151003T235028Z.wav_chan0.xml	0	0
03/10/2015 23:58	AMAR378.9.20151003T235828Z.wav_chan0.xml	0	0
03/09/2015 0:06	AMAR378.9.20150903T000628Z.wav_chan0.xml	0	0
03/09/2015 0:14	AMAR378.9.20150903T001428Z.wav_chan0.xml	0	0
03/09/2015 0:22	AMAR378.9.20150903T002228Z.wav_chan0.xml	0	0
03/09/2015 0:30	AMAR378.9.20150903T003028Z.wav_chan0.xml	0	0
03/09/2015 0:38	AMAR378.9.20150903T003828Z.wav_chan0.xml	0	0
03/09/2015 0:46	AMAR378.9.20150903T004628Z.wav_chan0.xml	0	0
03/09/2015 0:54	AMAR378.9.20150903T005428Z.wav_chan0.xml	0	0
03/09/2015 1:02	AMAR378.9.20150903T010228Z.wav_chan0.xml	0	0
03/09/2015 1:10	AMAR378.9.20150903T011028Z.wav_chan0.xml	0	0
03/09/2015 1:18	AMAR378.9.20150903T011828Z.wav_chan0.xml	0	0
03/09/2015 1:26	AMAR378.9.20150903T012628Z.wav_chan0.xml	0	0
03/09/2015 1:34	AMAR378.9.20150903T013428Z.wav_chan0.xml	0	0
03/09/2015 1:42	AMAR378.9.20150903T014228Z.wav_chan0.xml	0	0
03/09/2015 1:50	AMAR378.9.20150903T015028Z.wav_chan0.xml	0	0
03/09/2015 1:58	AMAR378.9.20150903T015828Z.wav_chan0.xml	0	0
03/09/2015 2:06	AMAR378.9.20150903T020628Z.wav_chan0.xml	0	0
03/09/2015 2:14	AMAR378.9.20150903T021428Z.wav_chan0.xml	0	0
03/09/2015 2:22	AMAR378.9.20150903T022228Z.wav_chan0.xml	0	0
03/09/2015 2:30	AMAR378.9.20150903T023028Z.wav_chan0.xml	0	0
[truncated: 17,079 more rows]
