# Supplementary material for: Signals from the deep: Spatial and temporal acoustic occurrence of beaked whales off western Ireland
Source: PLoS One. 2018 Jun 21;13(6):e0199431. doi: 10.1371/journal.pone.0199431 (PMC6013249; doi:10.1371/journal.pone.0199431)
Supplement: S4 Dataset — (CSV) [file pone.0199431.s004.csv]

Time	File	Cuviers	northern bottlenose
01/12/2015 0:04	AMAR371.9.20151201T000431Z.wav_chan0.xml	0	0
01/12/2015 0:12	AMAR371.9.20151201T001231Z.wav_chan0.xml	0	0
01/12/2015 0:20	AMAR371.9.20151201T002031Z.wav_chan0.xml	0	0
01/12/2015 0:28	AMAR371.9.20151201T002831Z.wav_chan0.xml	0	0
01/12/2015 0:36	AMAR371.9.20151201T003631Z.wav_chan0.xml	0	0
01/12/2015 0:44	AMAR371.9.20151201T004431Z.wav_chan0.xml	0	0
01/12/2015 0:52	AMAR371.9.20151201T005231Z.wav_chan0.xml	0	0
01/12/2015 1:00	AMAR371.9.20151201T010031Z.wav_chan0.xml	0	0
01/12/2015 1:08	AMAR371.9.20151201T010831Z.wav_chan0.xml	4	0
01/12/2015 1:16	AMAR371.9.20151201T011631Z.wav_chan0.xml	8	0
01/12/2015 1:24	AMAR371.9.20151201T012431Z.wav_chan0.xml	2	0
01/12/2015 1:32	AMAR371.9.20151201T013231Z.wav_chan0.xml	1	0
01/12/2015 1:40	AMAR371.9.20151201T014031Z.wav_chan0.xml	0	0
01/12/2015 1:48	AMAR371.9.20151201T014831Z.wav_chan0.xml	0	0
01/12/2015 1:56	AMAR371.9.20151201T015631Z.wav_chan0.xml	0	0
01/12/2015 2:04	AMAR371.9.20151201T020431Z.wav_chan0.xml	0	0
01/12/2015 2:12	AMAR371.9.20151201T021231Z.wav_chan0.xml	0	0
01/12/2015 2:20	AMAR371.9.20151201T022031Z.wav_chan0.xml	0	0
01/12/2015 2:28	AMAR371.9.20151201T022831Z.wav_chan0.xml	0	0
01/12/2015 2:36	AMAR371.9.20151201T023631Z.wav_chan0.xml	0	0
01/12/2015 2:44	AMAR371.9.20151201T024431Z.wav_chan0.xml	0	0
01/12/2015 2:52	AMAR371.9.20151201T025231Z.wav_chan0.xml	0	0
01/12/2015 3:00	AMAR371.9.20151201T030031Z.wav_chan0.xml	0	0
01/12/2015 3:08	AMAR371.9.20151201T030831Z.wav_chan0.xml	0	0
01/12/2015 3:16	AMAR371.9.20151201T031631Z.wav_chan0.xml	0	0
01/12/2015 3:24	AMAR371.9.20151201T032431Z.wav_chan0.xml	0	0
01/12/2015 3:32	AMAR371.9.20151201T033231Z.wav_chan0.xml	0	0
01/12/2015 3:40	AMAR371.9.20151201T034031Z.wav_chan0.xml	0	0
01/12/2015 3:48	AMAR371.9.20151201T034831Z.wav_chan0.xml	0	0
01/12/2015 3:56	AMAR371.9.20151201T035631Z.wav_chan0.xml	0	0
01/12/2015 4:04	AMAR371.9.20151201T040431Z.wav_chan0.xml	0	0
01/12/2015 4:12	AMAR371.9.20151201T041231Z.wav_chan0.xml	0	0
01/12/2015 4:20	AMAR371.9.20151201T042031Z.wav_chan0.xml	0	0
01/12/2015 4:28	AMAR371.9.20151201T042831Z.wav_chan0.xml	0	0
01/12/2015 4:36	AMAR371.9.20151201T043631Z.wav_chan0.xml	0	0
01/12/2015 4:44	AMAR371.9.20151201T044431Z.wav_chan0.xml	0	0
01/12/2015 4:52	AMAR371.9.20151201T045231Z.wav_chan0.xml	0	0
01/12/2015 5:00	AMAR371.9.20151201T050031Z.wav_chan0.xml	0	0
01/12/2015 5:08	AMAR371.9.20151201T050831Z.wav_chan0.xml	0	0
01/12/2015 5:16	AMAR371.9.20151201T051631Z.wav_chan0.xml	0	0
01/12/2015 5:24	AMAR371.9.20151201T052431Z.wav_chan0.xml	0	0
01/12/2015 5:32	AMAR371.9.20151201T053231Z.wav_chan0.xml	0	0
01/12/2015 5:40	AMAR371.9.20151201T054031Z.wav_chan0.xml	0	0
01/12/2015 5:48	AMAR371.9.20151201T054831Z.wav_chan0.xml	0	0
01/12/2015 5:56	AMAR371.9.20151201T055631Z.wav_chan0.xml	0	0
01/12/2015 6:04	AMAR371.9.20151201T060431Z.wav_chan0.xml	0	0
01/12/2015 6:12	AMAR371.9.20151201T061231Z.wav_chan0.xml	0	0
01/12/2015 6:20	AMAR371.9.20151201T062031Z.wav_chan0.xml	0	0
01/12/2015 6:28	AMAR371.9.20151201T062831Z.wav_chan0.xml	0	0
01/12/2015 6:36	AMAR371.9.20151201T063631Z.wav_chan0.xml	0	0
01/12/2015 6:44	AMAR371.9.20151201T064431Z.wav_chan0.xml	0	0
01/12/2015 6:52	AMAR371.9.20151201T065231Z.wav_chan0.xml	0	0
01/12/2015 7:00	AMAR371.9.20151201T070031Z.wav_chan0.xml	0	0
01/12/2015 7:08	AMAR371.9.20151201T070831Z.wav_chan0.xml	0	0
01/12/2015 7:16	AMAR371.9.20151201T071631Z.wav_chan0.xml	0	0
01/12/2015 7:24	AMAR371.9.20151201T072431Z.wav_chan0.xml	0	0
01/12/2015 7:32	AMAR371.9.20151201T073231Z.wav_chan0.xml	0	0
01/12/2015 7:40	AMAR371.9.20151201T074031Z.wav_chan0.xml	0	0
01/12/2015 7:48	AMAR371.9.20151201T074831Z.wav_chan0.xml	0	0
01/12/2015 7:56	AMAR371.9.20151201T075631Z.wav_chan0.xml	0	0
01/12/2015 8:04	AMAR371.9.20151201T080431Z.wav_chan0.xml	0	0
01/12/2015 8:12	AMAR371.9.20151201T081231Z.wav_chan0.xml	0	0
01/12/2015 8:20	AMAR371.9.20151201T082031Z.wav_chan0.xml	0	0
01/12/2015 8:28	AMAR371.9.20151201T082831Z.wav_chan0.xml	0	0
01/12/2015 8:36	AMAR371.9.20151201T083631Z.wav_chan0.xml	0	0
01/12/2015 8:44	AMAR371.9.20151201T084431Z.wav_chan0.xml	0	0
01/12/2015 8:52	AMAR371.9.20151201T085231Z.wav_chan0.xml	0	0
01/12/2015 9:00	AMAR371.9.20151201T090031Z.wav_chan0.xml	0	0
01/12/2015 9:08	AMAR371.9.20151201T090831Z.wav_chan0.xml	0	0
01/12/2015 9:16	AMAR371.9.20151201T091631Z.wav_chan0.xml	0	0
01/12/2015 9:24	AMAR371.9.20151201T092431Z.wav_chan0.xml	0	0
01/12/2015 9:32	AMAR371.9.20151201T093231Z.wav_chan0.xml	0	0
01/12/2015 9:40	AMAR371.9.20151201T094031Z.wav_chan0.xml	0	0
01/12/2015 9:48	AMAR371.9.20151201T094831Z.wav_chan0.xml	0	0
01/12/2015 9:56	AMAR371.9.20151201T095631Z.wav_chan0.xml	0	0
01/12/2015 10:04	AMAR371.9.20151201T100431Z.wav_chan0.xml	0	0
01/12/2015 10:12	AMAR371.9.20151201T101231Z.wav_chan0.xml	0	0
01/12/2015 10:20	AMAR371.9.20151201T102031Z.wav_chan0.xml	0	0
01/12/2015 10:28	AMAR371.9.20151201T102831Z.wav_chan0.xml	0	0
01/12/2015 10:36	AMAR371.9.20151201T103631Z.wav_chan0.xml	0	0
01/12/2015 10:44	AMAR371.9.20151201T104431Z.wav_chan0.xml	0	0
01/12/2015 10:52	AMAR371.9.20151201T105231Z.wav_chan0.xml	0	0
01/12/2015 11:00	AMAR371.9.20151201T110031Z.wav_chan0.xml	0	0
01/12/2015 11:08	AMAR371.9.20151201T110831Z.wav_chan0.xml	0	0
01/12/2015 11:16	AMAR371.9.20151201T111631Z.wav_chan0.xml	0	0
01/12/2015 11:24	AMAR371.9.20151201T112431Z.wav_chan0.xml	0	0
01/12/2015 11:32	AMAR371.9.20151201T113231Z.wav_chan0.xml	0	0
01/12/2015 11:40	AMAR371.9.20151201T114031Z.wav_chan0.xml	0	0
01/12/2015 11:48	AMAR371.9.20151201T114831Z.wav_chan0.xml	0	0
01/12/2015 11:56	AMAR371.9.20151201T115631Z.wav_chan0.xml	0	0
01/12/2015 12:04	AMAR371.9.20151201T120431Z.wav_chan0.xml	0	0
01/12/2015 12:12	AMAR371.9.20151201T121231Z.wav_chan0.xml	0	0
01/12/2015 12:20	AMAR371.9.20151201T122031Z.wav_chan0.xml	0	0
01/12/2015 12:28	AMAR371.9.20151201T122831Z.wav_chan0.xml	0	0
01/12/2015 12:36	AMAR371.9.20151201T123631Z.wav_chan0.xml	0	0
01/12/2015 12:44	AMAR371.9.20151201T124431Z.wav_chan0.xml	0	0
01/12/2015 12:52	AMAR371.9.20151201T125231Z.wav_chan0.xml	0	0
01/12/2015 13:00	AMAR371.9.20151201T130031Z.wav_chan0.xml	0	0
01/12/2015 13:08	AMAR371.9.20151201T130831Z.wav_chan0.xml	0	0
01/12/2015 13:16	AMAR371.9.20151201T131631Z.wav_chan0.xml	0	0
01/12/2015 13:24	AMAR371.9.20151201T132431Z.wav_chan0.xml	0	0
01/12/2015 13:32	AMAR371.9.20151201T133231Z.wav_chan0.xml	0	0
01/12/2015 13:40	AMAR371.9.20151201T134031Z.wav_chan0.xml	0	0
01/12/2015 13:48	AMAR371.9.20151201T134831Z.wav_chan0.xml	0	0
01/12/2015 13:56	AMAR371.9.20151201T135631Z.wav_chan0.xml	0	0
01/12/2015 14:04	AMAR371.9.20151201T140431Z.wav_chan0.xml	0	1
01/12/2015 14:12	AMAR371.9.20151201T141231Z.wav_chan0.xml	0	0
01/12/2015 14:20	AMAR371.9.20151201T142031Z.wav_chan0.xml	0	0
01/12/2015 14:28	AMAR371.9.20151201T142831Z.wav_chan0.xml	0	0
01/12/2015 14:36	AMAR371.9.20151201T143631Z.wav_chan0.xml	0	0
01/12/2015 14:44	AMAR371.9.20151201T144431Z.wav_chan0.xml	0	0
01/12/2015 14:52	AMAR371.9.20151201T145231Z.wav_chan0.xml	0	0
01/12/2015 15:00	AMAR371.9.20151201T150031Z.wav_chan0.xml	0	0
01/12/2015 15:08	AMAR371.9.20151201T150831Z.wav_chan0.xml	0	0
01/12/2015 15:16	AMAR371.9.20151201T151631Z.wav_chan0.xml	0	0
01/12/2015 15:24	AMAR371.9.20151201T152431Z.wav_chan0.xml	0	0
01/12/2015 15:32	AMAR371.9.20151201T153231Z.wav_chan0.xml	0	0
01/12/2015 15:40	AMAR371.9.20151201T154031Z.wav_chan0.xml	0	0
01/12/2015 15:48	AMAR371.9.20151201T154831Z.wav_chan0.xml	0	0
01/12/2015 15:56	AMAR371.9.20151201T155631Z.wav_chan0.xml	0	0
01/12/2015 16:04	AMAR371.9.20151201T160431Z.wav_chan0.xml	0	0
01/12/2015 16:12	AMAR371.9.20151201T161231Z.wav_chan0.xml	0	0
01/12/2015 16:20	AMAR371.9.20151201T162031Z.wav_chan0.xml	0	0
01/12/2015 16:28	AMAR371.9.20151201T162831Z.wav_chan0.xml	0	0
01/12/2015 16:36	AMAR371.9.20151201T163631Z.wav_chan0.xml	0	0
01/12/2015 16:44	AMAR371.9.20151201T164431Z.wav_chan0.xml	0	0
01/12/2015 16:52	AMAR371.9.20151201T165231Z.wav_chan0.xml	0	0
01/12/2015 17:00	AMAR371.9.20151201T170031Z.wav_chan0.xml	0	0
01/12/2015 17:08	AMAR371.9.20151201T170831Z.wav_chan0.xml	0	0
01/12/2015 17:16	AMAR371.9.20151201T171631Z.wav_chan0.xml	0	0
01/12/2015 17:24	AMAR371.9.20151201T172431Z.wav_chan0.xml	0	0
01/12/2015 17:32	AMAR371.9.20151201T173231Z.wav_chan0.xml	0	0
01/12/2015 17:40	AMAR371.9.20151201T174031Z.wav_chan0.xml	0	0
01/12/2015 17:48	AMAR371.9.20151201T174831Z.wav_chan0.xml	0	0
01/12/2015 17:56	AMAR371.9.20151201T175631Z.wav_chan0.xml	0	0
01/12/2015 18:04	AMAR371.9.20151201T180431Z.wav_chan0.xml	0	0
01/12/2015 18:12	AMAR371.9.20151201T181231Z.wav_chan0.xml	0	0
01/12/2015 18:20	AMAR371.9.20151201T182031Z.wav_chan0.xml	0	0
01/12/2015 18:28	AMAR371.9.20151201T182831Z.wav_chan0.xml	0	0
01/12/2015 18:36	AMAR371.9.20151201T183631Z.wav_chan0.xml	0	0
01/12/2015 18:44	AMAR371.9.20151201T184431Z.wav_chan0.xml	0	0
01/12/2015 18:52	AMAR371.9.20151201T185231Z.wav_chan0.xml	0	0
01/12/2015 19:00	AMAR371.9.20151201T190031Z.wav_chan0.xml	0	0
01/12/2015 19:08	AMAR371.9.20151201T190831Z.wav_chan0.xml	0	0
01/12/2015 19:16	AMAR371.9.20151201T191631Z.wav_chan0.xml	0	0
01/12/2015 19:24	AMAR371.9.20151201T192431Z.wav_chan0.xml	0	0
01/12/2015 19:32	AMAR371.9.20151201T193231Z.wav_chan0.xml	0	0
01/12/2015 19:40	AMAR371.9.20151201T194031Z.wav_chan0.xml	0	0
01/12/2015 19:48	AMAR371.9.20151201T194831Z.wav_chan0.xml	0	0
01/12/2015 19:56	AMAR371.9.20151201T195631Z.wav_chan0.xml	0	0
01/12/2015 20:04	AMAR371.9.20151201T200431Z.wav_chan0.xml	0	0
01/12/2015 20:12	AMAR371.9.20151201T201231Z.wav_chan0.xml	0	0
01/12/2015 20:20	AMAR371.9.20151201T202031Z.wav_chan0.xml	0	0
01/12/2015 20:28	AMAR371.9.20151201T202831Z.wav_chan0.xml	0	0
01/12/2015 20:36	AMAR371.9.20151201T203631Z.wav_chan0.xml	0	0
01/12/2015 20:44	AMAR371.9.20151201T204431Z.wav_chan0.xml	0	0
01/12/2015 20:52	AMAR371.9.20151201T205231Z.wav_chan0.xml	0	0
01/12/2015 21:00	AMAR371.9.20151201T210031Z.wav_chan0.xml	0	0
01/12/2015 21:08	AMAR371.9.20151201T210831Z.wav_chan0.xml	0	0
01/12/2015 21:16	AMAR371.9.20151201T211631Z.wav_chan0.xml	0	0
01/12/2015 21:24	AMAR371.9.20151201T212431Z.wav_chan0.xml	0	0
01/12/2015 21:32	AMAR371.9.20151201T213231Z.wav_chan0.xml	0	0
01/12/2015 21:40	AMAR371.9.20151201T214031Z.wav_chan0.xml	0	0
01/12/2015 21:48	AMAR371.9.20151201T214831Z.wav_chan0.xml	0	0
01/12/2015 21:56	AMAR371.9.20151201T215631Z.wav_chan0.xml	0	0
01/12/2015 22:04	AMAR371.9.20151201T220431Z.wav_chan0.xml	0	0
01/12/2015 22:12	AMAR371.9.20151201T221231Z.wav_chan0.xml	0	0
01/12/2015 22:20	AMAR371.9.20151201T222031Z.wav_chan0.xml	0	0
01/12/2015 22:28	AMAR371.9.20151201T222831Z.wav_chan0.xml	0	0
01/12/2015 22:36	AMAR371.9.20151201T223631Z.wav_chan0.xml	0	0
01/12/2015 22:44	AMAR371.9.20151201T224431Z.wav_chan0.xml	0	0
01/12/2015 22:52	AMAR371.9.20151201T225231Z.wav_chan0.xml	0	0
01/12/2015 23:00	AMAR371.9.20151201T230031Z.wav_chan0.xml	0	0
01/12/2015 23:08	AMAR371.9.20151201T230831Z.wav_chan0.xml	0	0
01/12/2015 23:16	AMAR371.9.20151201T231631Z.wav_chan0.xml	0	0
01/12/2015 23:24	AMAR371.9.20151201T232431Z.wav_chan0.xml	0	0
01/12/2015 23:32	AMAR371.9.20151201T233231Z.wav_chan0.xml	0	0
01/12/2015 23:40	AMAR371.9.20151201T234031Z.wav_chan0.xml	0	0
01/12/2015 23:48	AMAR371.9.20151201T234831Z.wav_chan0.xml	0	0
01/12/2015 23:56	AMAR371.9.20151201T235631Z.wav_chan0.xml	0	0
01/11/2015 0:04	AMAR371.9.20151101T000431Z.wav_chan0.xml	0	0
01/11/2015 0:12	AMAR371.9.20151101T001231Z.wav_chan0.xml	0	0
01/11/2015 0:20	AMAR371.9.20151101T002031Z.wav_chan0.xml	0	0
01/11/2015 0:28	AMAR371.9.20151101T002831Z.wav_chan0.xml	0	0
01/11/2015 0:36	AMAR371.9.20151101T003631Z.wav_chan0.xml	0	0
01/11/2015 0:44	AMAR371.9.20151101T004431Z.wav_chan0.xml	0	0
01/11/2015 0:52	AMAR371.9.20151101T005231Z.wav_chan0.xml	0	0
01/11/2015 1:00	AMAR371.9.20151101T010031Z.wav_chan0.xml	0	0
01/11/2015 1:08	AMAR371.9.20151101T010831Z.wav_chan0.xml	0	0
01/11/2015 1:16	AMAR371.9.20151101T011631Z.wav_chan0.xml	0	0
01/11/2015 1:24	AMAR371.9.20151101T012431Z.wav_chan0.xml	0	0
01/11/2015 1:32	AMAR371.9.20151101T013231Z.wav_chan0.xml	0	0
01/11/2015 1:40	AMAR371.9.20151101T014031Z.wav_chan0.xml	0	0
01/11/2015 1:48	AMAR371.9.20151101T014831Z.wav_chan0.xml	0	0
01/11/2015 1:56	AMAR371.9.20151101T015631Z.wav_chan0.xml	0	0
01/11/2015 2:04	AMAR371.9.20151101T020431Z.wav_chan0.xml	0	0
01/11/2015 2:12	AMAR371.9.20151101T021231Z.wav_chan0.xml	0	0
01/11/2015 2:20	AMAR371.9.20151101T022031Z.wav_chan0.xml	0	0
01/11/2015 2:28	AMAR371.9.20151101T022831Z.wav_chan0.xml	0	0
01/11/2015 2:36	AMAR371.9.20151101T023631Z.wav_chan0.xml	0	0
01/11/2015 2:44	AMAR371.9.20151101T024431Z.wav_chan0.xml	0	0
01/11/2015 2:52	AMAR371.9.20151101T025231Z.wav_chan0.xml	0	0
01/11/2015 3:00	AMAR371.9.20151101T030031Z.wav_chan0.xml	0	0
01/11/2015 3:08	AMAR371.9.20151101T030831Z.wav_chan0.xml	0	0
01/11/2015 3:16	AMAR371.9.20151101T031631Z.wav_chan0.xml	0	0
01/11/2015 3:24	AMAR371.9.20151101T032431Z.wav_chan0.xml	0	0
01/11/2015 3:32	AMAR371.9.20151101T033231Z.wav_chan0.xml	0	0
01/11/2015 3:40	AMAR371.9.20151101T034031Z.wav_chan0.xml	0	0
01/11/2015 3:48	AMAR371.9.20151101T034831Z.wav_chan0.xml	0	0
01/11/2015 3:56	AMAR371.9.20151101T035631Z.wav_chan0.xml	0	0
01/11/2015 4:04	AMAR371.9.20151101T040431Z.wav_chan0.xml	4	0
01/11/2015 4:12	AMAR371.9.20151101T041231Z.wav_chan0.xml	2	0
01/11/2015 4:20	AMAR371.9.20151101T042031Z.wav_chan0.xml	1	0
01/11/2015 4:28	AMAR371.9.20151101T042831Z.wav_chan0.xml	3	0
01/11/2015 4:36	AMAR371.9.20151101T043631Z.wav_chan0.xml	0	0
01/11/2015 4:44	AMAR371.9.20151101T044431Z.wav_chan0.xml	0	0
01/11/2015 4:52	AMAR371.9.20151101T045231Z.wav_chan0.xml	0	0
01/11/2015 5:00	AMAR371.9.20151101T050031Z.wav_chan0.xml	0	0
01/11/2015 5:08	AMAR371.9.20151101T050831Z.wav_chan0.xml	0	0
01/11/2015 5:16	AMAR371.9.20151101T051631Z.wav_chan0.xml	0	0
01/11/2015 5:24	AMAR371.9.20151101T052431Z.wav_chan0.xml	2	0
01/11/2015 5:32	AMAR371.9.20151101T053231Z.wav_chan0.xml	0	0
01/11/2015 5:40	AMAR371.9.20151101T054031Z.wav_chan0.xml	10	0
01/11/2015 5:48	AMAR371.9.20151101T054831Z.wav_chan0.xml	0	0
01/11/2015 5:56	AMAR371.9.20151101T055631Z.wav_chan0.xml	0	0
01/11/2015 6:04	AMAR371.9.20151101T060431Z.wav_chan0.xml	0	0
01/11/2015 6:12	AMAR371.9.20151101T061231Z.wav_chan0.xml	0	0
01/11/2015 6:20	AMAR371.9.20151101T062031Z.wav_chan0.xml	0	0
01/11/2015 6:28	AMAR371.9.20151101T062831Z.wav_chan0.xml	0	0
01/11/2015 6:36	AMAR371.9.20151101T063631Z.wav_chan0.xml	0	0
01/11/2015 6:44	AMAR371.9.20151101T064431Z.wav_chan0.xml	0	0
01/11/2015 6:52	AMAR371.9.20151101T065231Z.wav_chan0.xml	0	0
01/11/2015 7:00	AMAR371.9.20151101T070031Z.wav_chan0.xml	0	0
01/11/2015 7:08	AMAR371.9.20151101T070831Z.wav_chan0.xml	0	0
01/11/2015 7:16	AMAR371.9.20151101T071631Z.wav_chan0.xml	0	0
01/11/2015 7:24	AMAR371.9.20151101T072431Z.wav_chan0.xml	2	0
01/11/2015 7:32	AMAR371.9.20151101T073231Z.wav_chan0.xml	3	0
01/11/2015 7:40	AMAR371.9.20151101T074031Z.wav_chan0.xml	3	0
01/11/2015 7:48	AMAR371.9.20151101T074831Z.wav_chan0.xml	0	0
01/11/2015 7:56	AMAR371.9.20151101T075631Z.wav_chan0.xml	8	0
01/11/2015 8:04	AMAR371.9.20151101T080431Z.wav_chan0.xml	0	0
01/11/2015 8:12	AMAR371.9.20151101T081231Z.wav_chan0.xml	0	0
01/11/2015 8:20	AMAR371.9.20151101T082031Z.wav_chan0.xml	0	0
01/11/2015 8:28	AMAR371.9.20151101T082831Z.wav_chan0.xml	0	0
01/11/2015 8:36	AMAR371.9.20151101T083631Z.wav_chan0.xml	0	0
01/11/2015 8:44	AMAR371.9.20151101T084431Z.wav_chan0.xml	0	0
01/11/2015 8:52	AMAR371.9.20151101T085231Z.wav_chan0.xml	0	0
01/11/2015 9:00	AMAR371.9.20151101T090031Z.wav_chan0.xml	0	0
01/11/2015 9:08	AMAR371.9.20151101T090831Z.wav_chan0.xml	0	0
01/11/2015 9:16	AMAR371.9.20151101T091631Z.wav_chan0.xml	0	0
01/11/2015 9:24	AMAR371.9.20151101T092431Z.wav_chan0.xml	0	0
01/11/2015 9:32	AMAR371.9.20151101T093231Z.wav_chan0.xml	0	0
01/11/2015 9:40	AMAR371.9.20151101T094031Z.wav_chan0.xml	0	0
01/11/2015 9:48	AMAR371.9.20151101T094831Z.wav_chan0.xml	0	0
01/11/2015 9:56	AMAR371.9.20151101T095631Z.wav_chan0.xml	0	0
01/11/2015 10:04	AMAR371.9.20151101T100431Z.wav_chan0.xml	0	0
01/11/2015 10:12	AMAR371.9.20151101T101231Z.wav_chan0.xml	0	0
01/11/2015 10:20	AMAR371.9.20151101T102031Z.wav_chan0.xml	0	0
01/11/2015 10:28	AMAR371.9.20151101T102831Z.wav_chan0.xml	0	0
01/11/2015 10:36	AMAR371.9.20151101T103631Z.wav_chan0.xml	0	0
01/11/2015 10:44	AMAR371.9.20151101T104431Z.wav_chan0.xml	0	0
01/11/2015 10:52	AMAR371.9.20151101T105231Z.wav_chan0.xml	0	0
01/11/2015 11:00	AMAR371.9.20151101T110031Z.wav_chan0.xml	0	0
01/11/2015 11:08	AMAR371.9.20151101T110831Z.wav_chan0.xml	0	0
01/11/2015 11:16	AMAR371.9.20151101T111631Z.wav_chan0.xml	1	0
01/11/2015 11:24	AMAR371.9.20151101T112431Z.wav_chan0.xml	0	0
01/11/2015 11:32	AMAR371.9.20151101T113231Z.wav_chan0.xml	0	0
01/11/2015 11:40	AMAR371.9.20151101T114031Z.wav_chan0.xml	0	0
01/11/2015 11:48	AMAR371.9.20151101T114831Z.wav_chan0.xml	0	0
01/11/2015 11:56	AMAR371.9.20151101T115631Z.wav_chan0.xml	0	0
01/11/2015 12:04	AMAR371.9.20151101T120431Z.wav_chan0.xml	0	0
01/11/2015 12:12	AMAR371.9.20151101T121231Z.wav_chan0.xml	0	0
01/11/2015 12:20	AMAR371.9.20151101T122031Z.wav_chan0.xml	0	0
01/11/2015 12:28	AMAR371.9.20151101T122831Z.wav_chan0.xml	0	0
01/11/2015 12:36	AMAR371.9.20151101T123631Z.wav_chan0.xml	0	0
01/11/2015 12:44	AMAR371.9.20151101T124431Z.wav_chan0.xml	0	0
01/11/2015 12:52	AMAR371.9.20151101T125231Z.wav_chan0.xml	0	0
01/11/2015 13:00	AMAR371.9.20151101T130031Z.wav_chan0.xml	0	1
01/11/2015 13:08	AMAR371.9.20151101T130831Z.wav_chan0.xml	0	0
01/11/2015 13:16	AMAR371.9.20151101T131631Z.wav_chan0.xml	0	0
01/11/2015 13:24	AMAR371.9.20151101T132431Z.wav_chan0.xml	0	0
01/11/2015 13:32	AMAR371.9.20151101T133231Z.wav_chan0.xml	0	0
01/11/2015 13:40	AMAR371.9.20151101T134031Z.wav_chan0.xml	0	0
01/11/2015 13:48	AMAR371.9.20151101T134831Z.wav_chan0.xml	0	0
01/11/2015 13:56	AMAR371.9.20151101T135631Z.wav_chan0.xml	0	0
01/11/2015 14:04	AMAR371.9.20151101T140431Z.wav_chan0.xml	0	0
01/11/2015 14:12	AMAR371.9.20151101T141231Z.wav_chan0.xml	0	0
01/11/2015 14:20	AMAR371.9.20151101T142031Z.wav_chan0.xml	0	0
01/11/2015 14:28	AMAR371.9.20151101T142831Z.wav_chan0.xml	0	0
01/11/2015 14:36	AMAR371.9.20151101T143631Z.wav_chan0.xml	0	0
01/11/2015 14:44	AMAR371.9.20151101T144431Z.wav_chan0.xml	0	0
01/11/2015 14:52	AMAR371.9.20151101T145231Z.wav_chan0.xml	0	0
01/11/2015 15:00	AMAR371.9.20151101T150031Z.wav_chan0.xml	0	0
01/11/2015 15:08	AMAR371.9.20151101T150831Z.wav_chan0.xml	0	0
01/11/2015 15:16	AMAR371.9.20151101T151631Z.wav_chan0.xml	0	0
01/11/2015 15:24	AMAR371.9.20151101T152431Z.wav_chan0.xml	0	0
01/11/2015 15:32	AMAR371.9.20151101T153231Z.wav_chan0.xml	0	0
01/11/2015 15:40	AMAR371.9.20151101T154031Z.wav_chan0.xml	0	0
01/11/2015 15:48	AMAR371.9.20151101T154831Z.wav_chan0.xml	0	0
01/11/2015 15:56	AMAR371.9.20151101T155631Z.wav_chan0.xml	0	0
01/11/2015 16:04	AMAR371.9.20151101T160431Z.wav_chan0.xml	0	0
01/11/2015 16:12	AMAR371.9.20151101T161231Z.wav_chan0.xml	0	0
01/11/2015 16:20	AMAR371.9.20151101T162031Z.wav_chan0.xml	0	0
01/11/2015 16:28	AMAR371.9.20151101T162831Z.wav_chan0.xml	0	0
01/11/2015 16:36	AMAR371.9.20151101T163631Z.wav_chan0.xml	0	0
01/11/2015 16:44	AMAR371.9.20151101T164431Z.wav_chan0.xml	0	0
01/11/2015 16:52	AMAR371.9.20151101T165231Z.wav_chan0.xml	0	0
01/11/2015 17:00	AMAR371.9.20151101T170031Z.wav_chan0.xml	0	0
01/11/2015 17:08	AMAR371.9.20151101T170831Z.wav_chan0.xml	0	0
01/11/2015 17:16	AMAR371.9.20151101T171631Z.wav_chan0.xml	0	0
01/11/2015 17:24	AMAR371.9.20151101T172431Z.wav_chan0.xml	1	0
01/11/2015 17:32	AMAR371.9.20151101T173231Z.wav_chan0.xml	1	0
01/11/2015 17:40	AMAR371.9.20151101T174031Z.wav_chan0.xml	8	0
01/11/2015 17:48	AMAR371.9.20151101T174831Z.wav_chan0.xml	0	0
01/11/2015 17:56	AMAR371.9.20151101T175631Z.wav_chan0.xml	0	0
01/11/2015 18:04	AMAR371.9.20151101T180431Z.wav_chan0.xml	0	0
01/11/2015 18:12	AMAR371.9.20151101T181231Z.wav_chan0.xml	0	0
01/11/2015 18:20	AMAR371.9.20151101T182031Z.wav_chan0.xml	0	0
01/11/2015 18:28	AMAR371.9.20151101T182831Z.wav_chan0.xml	0	0
01/11/2015 18:36	AMAR371.9.20151101T183631Z.wav_chan0.xml	0	0
01/11/2015 18:44	AMAR371.9.20151101T184431Z.wav_chan0.xml	0	0
01/11/2015 18:52	AMAR371.9.20151101T185231Z.wav_chan0.xml	0	0
01/11/2015 19:00	AMAR371.9.20151101T190031Z.wav_chan0.xml	0	0
01/11/2015 19:08	AMAR371.9.20151101T190831Z.wav_chan0.xml	0	0
01/11/2015 19:16	AMAR371.9.20151101T191631Z.wav_chan0.xml	0	0
01/11/2015 19:24	AMAR371.9.20151101T192431Z.wav_chan0.xml	0	0
01/11/2015 19:32	AMAR371.9.20151101T193231Z.wav_chan0.xml	0	0
01/11/2015 19:40	AMAR371.9.20151101T194031Z.wav_chan0.xml	0	0
01/11/2015 19:48	AMAR371.9.20151101T194831Z.wav_chan0.xml	0	0
01/11/2015 19:56	AMAR371.9.20151101T195631Z.wav_chan0.xml	0	0
01/11/2015 20:04	AMAR371.9.20151101T200431Z.wav_chan0.xml	0	0
01/11/2015 20:12	AMAR371.9.20151101T201231Z.wav_chan0.xml	0	0
01/11/2015 20:20	AMAR371.9.20151101T202031Z.wav_chan0.xml	0	0
01/11/2015 20:28	AMAR371.9.20151101T202831Z.wav_chan0.xml	0	0
01/11/2015 20:36	AMAR371.9.20151101T203631Z.wav_chan0.xml	0	0
01/11/2015 20:44	AMAR371.9.20151101T204431Z.wav_chan0.xml	0	0
01/11/2015 20:52	AMAR371.9.20151101T205231Z.wav_chan0.xml	0	0
01/11/2015 21:00	AMAR371.9.20151101T210031Z.wav_chan0.xml	0	0
01/11/2015 21:08	AMAR371.9.20151101T210831Z.wav_chan0.xml	0	0
01/11/2015 21:16	AMAR371.9.20151101T211631Z.wav_chan0.xml	0	0
01/11/2015 21:24	AMAR371.9.20151101T212431Z.wav_chan0.xml	0	0
01/11/2015 21:32	AMAR371.9.20151101T213231Z.wav_chan0.xml	0	0
01/11/2015 21:40	AMAR371.9.20151101T214031Z.wav_chan0.xml	0	0
01/11/2015 21:48	AMAR371.9.20151101T214831Z.wav_chan0.xml	0	0
01/11/2015 21:56	AMAR371.9.20151101T215631Z.wav_chan0.xml	0	0
01/11/2015 22:04	AMAR371.9.20151101T220431Z.wav_chan0.xml	0	0
01/11/2015 22:12	AMAR371.9.20151101T221231Z.wav_chan0.xml	0	0
01/11/2015 22:20	AMAR371.9.20151101T222031Z.wav_chan0.xml	0	0
01/11/2015 22:28	AMAR371.9.20151101T222831Z.wav_chan0.xml	0	0
01/11/2015 22:36	AMAR371.9.20151101T223631Z.wav_chan0.xml	0	0
01/11/2015 22:44	AMAR371.9.20151101T224431Z.wav_chan0.xml	0	0
01/11/2015 22:52	AMAR371.9.20151101T225231Z.wav_chan0.xml	0	0
01/11/2015 23:00	AMAR371.9.20151101T230031Z.wav_chan0.xml	0	0
01/11/2015 23:08	AMAR371.9.20151101T230831Z.wav_chan0.xml	0	0
01/11/2015 23:16	AMAR371.9.20151101T231631Z.wav_chan0.xml	0	0
01/11/2015 23:24	AMAR371.9.20151101T232431Z.wav_chan0.xml	0	0
01/11/2015 23:32	AMAR371.9.20151101T233231Z.wav_chan0.xml	0	0
01/11/2015 23:40	AMAR371.9.20151101T234031Z.wav_chan0.xml	0	0
01/11/2015 23:48	AMAR371.9.20151101T234831Z.wav_chan0.xml	0	0
01/11/2015 23:56	AMAR371.9.20151101T235631Z.wav_chan0.xml	0	0
01/10/2015 0:04	AMAR371.9.20151001T000431Z.wav_chan0.xml	0	0
01/10/2015 0:12	AMAR371.9.20151001T001231Z.wav_chan0.xml	0	0
01/10/2015 0:20	AMAR371.9.20151001T002031Z.wav_chan0.xml	0	0
01/10/2015 0:28	AMAR371.9.20151001T002831Z.wav_chan0.xml	0	0
01/10/2015 0:36	AMAR371.9.20151001T003631Z.wav_chan0.xml	0	0
01/10/2015 0:44	AMAR371.9.20151001T004431Z.wav_chan0.xml	0	0
01/10/2015 0:52	AMAR371.9.20151001T005231Z.wav_chan0.xml	0	0
01/10/2015 1:00	AMAR371.9.20151001T010031Z.wav_chan0.xml	0	0
01/10/2015 1:08	AMAR371.9.20151001T010831Z.wav_chan0.xml	0	0
01/10/2015 1:16	AMAR371.9.20151001T011631Z.wav_chan0.xml	0	0
01/10/2015 1:24	AMAR371.9.20151001T012431Z.wav_chan0.xml	0	0
01/10/2015 1:32	AMAR371.9.20151001T013231Z.wav_chan0.xml	0	0
01/10/2015 1:40	AMAR371.9.20151001T014031Z.wav_chan0.xml	0	0
01/10/2015 1:48	AMAR371.9.20151001T014831Z.wav_chan0.xml	0	0
01/10/2015 1:56	AMAR371.9.20151001T015631Z.wav_chan0.xml	0	0
01/10/2015 2:04	AMAR371.9.20151001T020431Z.wav_chan0.xml	0	0
01/10/2015 2:12	AMAR371.9.20151001T021231Z.wav_chan0.xml	0	0
01/10/2015 2:20	AMAR371.9.20151001T022031Z.wav_chan0.xml	0	0
01/10/2015 2:28	AMAR371.9.20151001T022831Z.wav_chan0.xml	0	0
01/10/2015 2:36	AMAR371.9.20151001T023631Z.wav_chan0.xml	0	0
01/10/2015 2:44	AMAR371.9.20151001T024431Z.wav_chan0.xml	0	0
01/10/2015 2:52	AMAR371.9.20151001T025231Z.wav_chan0.xml	0	0
01/10/2015 3:00	AMAR371.9.20151001T030031Z.wav_chan0.xml	0	0
01/10/2015 3:08	AMAR371.9.20151001T030831Z.wav_chan0.xml	0	0
01/10/2015 3:16	AMAR371.9.20151001T031631Z.wav_chan0.xml	2	0
01/10/2015 3:24	AMAR371.9.20151001T032431Z.wav_chan0.xml	0	0
01/10/2015 3:32	AMAR371.9.20151001T033231Z.wav_chan0.xml	0	0
01/10/2015 3:40	AMAR371.9.20151001T034031Z.wav_chan0.xml	0	0
01/10/2015 3:48	AMAR371.9.20151001T034831Z.wav_chan0.xml	0	0
01/10/2015 3:56	AMAR371.9.20151001T035631Z.wav_chan0.xml	0	0
01/10/2015 4:04	AMAR371.9.20151001T040431Z.wav_chan0.xml	0	0
01/10/2015 4:12	AMAR371.9.20151001T041231Z.wav_chan0.xml	0	0
01/10/2015 4:20	AMAR371.9.20151001T042031Z.wav_chan0.xml	0	0
01/10/2015 4:28	AMAR371.9.20151001T042831Z.wav_chan0.xml	0	0
01/10/2015 4:36	AMAR371.9.20151001T043631Z.wav_chan0.xml	0	0
01/10/2015 4:44	AMAR371.9.20151001T044431Z.wav_chan0.xml	0	0
01/10/2015 4:52	AMAR371.9.20151001T045231Z.wav_chan0.xml	0	0
01/10/2015 5:00	AMAR371.9.20151001T050031Z.wav_chan0.xml	0	1
01/10/2015 5:08	AMAR371.9.20151001T050831Z.wav_chan0.xml	0	0
01/10/2015 5:16	AMAR371.9.20151001T051631Z.wav_chan0.xml	0	0
01/10/2015 5:24	AMAR371.9.20151001T052431Z.wav_chan0.xml	0	0
01/10/2015 5:32	AMAR371.9.20151001T053231Z.wav_chan0.xml	0	0
01/10/2015 5:40	AMAR371.9.20151001T054031Z.wav_chan0.xml	0	0
01/10/2015 5:48	AMAR371.9.20151001T054831Z.wav_chan0.xml	0	0
01/10/2015 5:56	AMAR371.9.20151001T055631Z.wav_chan0.xml	0	0
01/10/2015 6:04	AMAR371.9.20151001T060431Z.wav_chan0.xml	0	0
01/10/2015 6:12	AMAR371.9.20151001T061231Z.wav_chan0.xml	0	0
01/10/2015 6:20	AMAR371.9.20151001T062031Z.wav_chan0.xml	0	0
01/10/2015 6:28	AMAR371.9.20151001T062831Z.wav_chan0.xml	0	0
01/10/2015 6:36	AMAR371.9.20151001T063631Z.wav_chan0.xml	0	0
01/10/2015 6:44	AMAR371.9.20151001T064431Z.wav_chan0.xml	0	0
01/10/2015 6:52	AMAR371.9.20151001T065231Z.wav_chan0.xml	0	0
01/10/2015 7:00	AMAR371.9.20151001T070031Z.wav_chan0.xml	0	0
01/10/2015 7:08	AMAR371.9.20151001T070831Z.wav_chan0.xml	0	0
01/10/2015 7:16	AMAR371.9.20151001T071631Z.wav_chan0.xml	0	0
01/10/2015 7:24	AMAR371.9.20151001T072431Z.wav_chan0.xml	0	0
01/10/2015 7:32	AMAR371.9.20151001T073231Z.wav_chan0.xml	0	0
01/10/2015 7:40	AMAR371.9.20151001T074031Z.wav_chan0.xml	0	0
01/10/2015 7:48	AMAR371.9.20151001T074831Z.wav_chan0.xml	0	0
01/10/2015 7:56	AMAR371.9.20151001T075631Z.wav_chan0.xml	0	0
01/10/2015 8:04	AMAR371.9.20151001T080431Z.wav_chan0.xml	0	0
01/10/2015 8:12	AMAR371.9.20151001T081231Z.wav_chan0.xml	0	0
01/10/2015 8:20	AMAR371.9.20151001T082031Z.wav_chan0.xml	0	0
01/10/2015 8:28	AMAR371.9.20151001T082831Z.wav_chan0.xml	0	0
01/10/2015 8:36	AMAR371.9.20151001T083631Z.wav_chan0.xml	0	0
01/10/2015 8:44	AMAR371.9.20151001T084431Z.wav_chan0.xml	0	0
01/10/2015 8:52	AMAR371.9.20151001T085231Z.wav_chan0.xml	0	0
01/10/2015 9:00	AMAR371.9.20151001T090031Z.wav_chan0.xml	0	0
01/10/2015 9:08	AMAR371.9.20151001T090831Z.wav_chan0.xml	0	0
01/10/2015 9:16	AMAR371.9.20151001T091631Z.wav_chan0.xml	0	0
01/10/2015 9:24	AMAR371.9.20151001T092431Z.wav_chan0.xml	0	0
01/10/2015 9:32	AMAR371.9.20151001T093231Z.wav_chan0.xml	0	0
01/10/2015 9:40	AMAR371.9.20151001T094031Z.wav_chan0.xml	0	0
01/10/2015 9:48	AMAR371.9.20151001T094831Z.wav_chan0.xml	0	0
01/10/2015 9:56	AMAR371.9.20151001T095631Z.wav_chan0.xml	0	0
01/10/2015 10:04	AMAR371.9.20151001T100431Z.wav_chan0.xml	0	0
01/10/2015 10:12	AMAR371.9.20151001T101231Z.wav_chan0.xml	0	0
01/10/2015 10:20	AMAR371.9.20151001T102031Z.wav_chan0.xml	0	0
01/10/2015 10:28	AMAR371.9.20151001T102831Z.wav_chan0.xml	0	0
01/10/2015 10:36	AMAR371.9.20151001T103631Z.wav_chan0.xml	0	0
01/10/2015 10:44	AMAR371.9.20151001T104431Z.wav_chan0.xml	0	0
01/10/2015 10:52	AMAR371.9.20151001T105231Z.wav_chan0.xml	0	0
01/10/2015 11:00	AMAR371.9.20151001T110031Z.wav_chan0.xml	0	0
01/10/2015 11:08	AMAR371.9.20151001T110831Z.wav_chan0.xml	0	0
01/10/2015 11:16	AMAR371.9.20151001T111631Z.wav_chan0.xml	0	0
01/10/2015 11:24	AMAR371.9.20151001T112431Z.wav_chan0.xml	0	0
01/10/2015 11:32	AMAR371.9.20151001T113231Z.wav_chan0.xml	0	0
01/10/2015 11:40	AMAR371.9.20151001T114031Z.wav_chan0.xml	0	0
01/10/2015 11:48	AMAR371.9.20151001T114831Z.wav_chan0.xml	0	0
01/10/2015 11:56	AMAR371.9.20151001T115631Z.wav_chan0.xml	0	0
01/10/2015 12:04	AMAR371.9.20151001T120431Z.wav_chan0.xml	0	0
01/10/2015 12:12	AMAR371.9.20151001T121231Z.wav_chan0.xml	0	0
01/10/2015 12:20	AMAR371.9.20151001T122031Z.wav_chan0.xml	0	0
01/10/2015 12:28	AMAR371.9.20151001T122831Z.wav_chan0.xml	0	0
01/10/2015 12:36	AMAR371.9.20151001T123631Z.wav_chan0.xml	0	0
01/10/2015 12:44	AMAR371.9.20151001T124431Z.wav_chan0.xml	0	0
01/10/2015 12:52	AMAR371.9.20151001T125231Z.wav_chan0.xml	0	0
01/10/2015 13:00	AMAR371.9.20151001T130031Z.wav_chan0.xml	0	0
01/10/2015 13:08	AMAR371.9.20151001T130831Z.wav_chan0.xml	0	0
01/10/2015 13:16	AMAR371.9.20151001T131631Z.wav_chan0.xml	0	0
01/10/2015 13:24	AMAR371.9.20151001T132431Z.wav_chan0.xml	0	0
01/10/2015 13:32	AMAR371.9.20151001T133231Z.wav_chan0.xml	0	0
01/10/2015 13:40	AMAR371.9.20151001T134031Z.wav_chan0.xml	0	0
01/10/2015 13:48	AMAR371.9.20151001T134831Z.wav_chan0.xml	0	0
01/10/2015 13:56	AMAR371.9.20151001T135631Z.wav_chan0.xml	0	0
01/10/2015 14:04	AMAR371.9.20151001T140431Z.wav_chan0.xml	0	0
01/10/2015 14:12	AMAR371.9.20151001T141231Z.wav_chan0.xml	0	0
01/10/2015 14:20	AMAR371.9.20151001T142031Z.wav_chan0.xml	0	0
01/10/2015 14:28	AMAR371.9.20151001T142831Z.wav_chan0.xml	0	0
01/10/2015 14:36	AMAR371.9.20151001T143631Z.wav_chan0.xml	0	0
01/10/2015 14:44	AMAR371.9.20151001T144431Z.wav_chan0.xml	0	0
01/10/2015 14:52	AMAR371.9.20151001T145231Z.wav_chan0.xml	0	0
01/10/2015 15:00	AMAR371.9.20151001T150031Z.wav_chan0.xml	0	0
01/10/2015 15:08	AMAR371.9.20151001T150831Z.wav_chan0.xml	0	0
01/10/2015 15:16	AMAR371.9.20151001T151631Z.wav_chan0.xml	0	0
01/10/2015 15:24	AMAR371.9.20151001T152431Z.wav_chan0.xml	0	0
01/10/2015 15:32	AMAR371.9.20151001T153231Z.wav_chan0.xml	0	0
01/10/2015 15:40	AMAR371.9.20151001T154031Z.wav_chan0.xml	0	0
01/10/2015 15:48	AMAR371.9.20151001T154831Z.wav_chan0.xml	0	0
01/10/2015 15:56	AMAR371.9.20151001T155631Z.wav_chan0.xml	0	0
01/10/2015 16:04	AMAR371.9.20151001T160431Z.wav_chan0.xml	0	0
01/10/2015 16:12	AMAR371.9.20151001T161231Z.wav_chan0.xml	0	0
01/10/2015 16:20	AMAR371.9.20151001T162031Z.wav_chan0.xml	0	0
01/10/2015 16:28	AMAR371.9.20151001T162831Z.wav_chan0.xml	0	0
01/10/2015 16:36	AMAR371.9.20151001T163631Z.wav_chan0.xml	0	0
01/10/2015 16:44	AMAR371.9.20151001T164431Z.wav_chan0.xml	0	0
01/10/2015 16:52	AMAR371.9.20151001T165231Z.wav_chan0.xml	0	0
01/10/2015 17:00	AMAR371.9.20151001T170031Z.wav_chan0.xml	0	0
01/10/2015 17:08	AMAR371.9.20151001T170831Z.wav_chan0.xml	0	0
01/10/2015 17:16	AMAR371.9.20151001T171631Z.wav_chan0.xml	0	0
01/10/2015 17:24	AMAR371.9.20151001T172431Z.wav_chan0.xml	0	0
01/10/2015 17:32	AMAR371.9.20151001T173231Z.wav_chan0.xml	0	0
01/10/2015 17:40	AMAR371.9.20151001T174031Z.wav_chan0.xml	0	0
01/10/2015 17:48	AMAR371.9.20151001T174831Z.wav_chan0.xml	0	0
01/10/2015 17:56	AMAR371.9.20151001T175631Z.wav_chan0.xml	0	0
01/10/2015 18:04	AMAR371.9.20151001T180431Z.wav_chan0.xml	0	0
01/10/2015 18:12	AMAR371.9.20151001T181231Z.wav_chan0.xml	0	0
01/10/2015 18:20	AMAR371.9.20151001T182031Z.wav_chan0.xml	0	0
01/10/2015 18:28	AMAR371.9.20151001T182831Z.wav_chan0.xml	0	0
01/10/2015 18:36	AMAR371.9.20151001T183631Z.wav_chan0.xml	0	0
01/10/2015 18:44	AMAR371.9.20151001T184431Z.wav_chan0.xml	0	0
01/10/2015 18:52	AMAR371.9.20151001T185231Z.wav_chan0.xml	0	0
01/10/2015 19:00	AMAR371.9.20151001T190031Z.wav_chan0.xml	0	0
01/10/2015 19:08	AMAR371.9.20151001T190831Z.wav_chan0.xml	0	0
01/10/2015 19:16	AMAR371.9.20151001T191631Z.wav_chan0.xml	0	0
01/10/2015 19:24	AMAR371.9.20151001T192431Z.wav_chan0.xml	0	0
01/10/2015 19:32	AMAR371.9.20151001T193231Z.wav_chan0.xml	0	0
01/10/2015 19:40	AMAR371.9.20151001T194031Z.wav_chan0.xml	0	0
01/10/2015 19:48	AMAR371.9.20151001T194831Z.wav_chan0.xml	0	0
01/10/2015 19:56	AMAR371.9.20151001T195631Z.wav_chan0.xml	0	0
01/10/2015 20:04	AMAR371.9.20151001T200431Z.wav_chan0.xml	0	0
01/10/2015 20:12	AMAR371.9.20151001T201231Z.wav_chan0.xml	0	0
01/10/2015 20:20	AMAR371.9.20151001T202031Z.wav_chan0.xml	0	0
01/10/2015 20:28	AMAR371.9.20151001T202831Z.wav_chan0.xml	0	0
01/10/2015 20:36	AMAR371.9.20151001T203631Z.wav_chan0.xml	0	0
01/10/2015 20:44	AMAR371.9.20151001T204431Z.wav_chan0.xml	0	0
01/10/2015 20:52	AMAR371.9.20151001T205231Z.wav_chan0.xml	0	0
01/10/2015 21:00	AMAR371.9.20151001T210031Z.wav_chan0.xml	0	0
01/10/2015 21:08	AMAR371.9.20151001T210831Z.wav_chan0.xml	0	0
01/10/2015 21:16	AMAR371.9.20151001T211631Z.wav_chan0.xml	0	0
01/10/2015 21:24	AMAR371.9.20151001T212431Z.wav_chan0.xml	0	0
01/10/2015 21:32	AMAR371.9.20151001T213231Z.wav_chan0.xml	0	0
01/10/2015 21:40	AMAR371.9.20151001T214031Z.wav_chan0.xml	0	0
01/10/2015 21:48	AMAR371.9.20151001T214831Z.wav_chan0.xml	0	0
01/10/2015 21:56	AMAR371.9.20151001T215631Z.wav_chan0.xml	0	0
01/10/2015 22:04	AMAR371.9.20151001T220431Z.wav_chan0.xml	0	0
01/10/2015 22:12	AMAR371.9.20151001T221231Z.wav_chan0.xml	0	0
01/10/2015 22:20	AMAR371.9.20151001T222031Z.wav_chan0.xml	0	0
01/10/2015 22:28	AMAR371.9.20151001T222831Z.wav_chan0.xml	0	0
01/10/2015 22:36	AMAR371.9.20151001T223631Z.wav_chan0.xml	0	0
01/10/2015 22:44	AMAR371.9.20151001T224431Z.wav_chan0.xml	0	0
01/10/2015 22:52	AMAR371.9.20151001T225231Z.wav_chan0.xml	9	0
01/10/2015 23:00	AMAR371.9.20151001T230031Z.wav_chan0.xml	10	0
01/10/2015 23:08	AMAR371.9.20151001T230831Z.wav_chan0.xml	7	0
01/10/2015 23:16	AMAR371.9.20151001T231631Z.wav_chan0.xml	0	0
01/10/2015 23:24	AMAR371.9.20151001T232431Z.wav_chan0.xml	0	0
01/10/2015 23:32	AMAR371.9.20151001T233231Z.wav_chan0.xml	0	0
01/10/2015 23:40	AMAR371.9.20151001T234031Z.wav_chan0.xml	0	0
01/10/2015 23:48	AMAR371.9.20151001T234831Z.wav_chan0.xml	0	0
01/10/2015 23:56	AMAR371.9.20151001T235631Z.wav_chan0.xml	0	0
01/09/2015 0:04	AMAR371.9.20150901T000431Z.wav_chan0.xml	0	0
01/09/2015 0:12	AMAR371.9.20150901T001231Z.wav_chan0.xml	0	0
01/09/2015 0:20	AMAR371.9.20150901T002031Z.wav_chan0.xml	0	0
01/09/2015 0:28	AMAR371.9.20150901T002831Z.wav_chan0.xml	0	0
01/09/2015 0:36	AMAR371.9.20150901T003631Z.wav_chan0.xml	0	0
01/09/2015 0:44	AMAR371.9.20150901T004431Z.wav_chan0.xml	1	0
01/09/2015 0:52	AMAR371.9.20150901T005231Z.wav_chan0.xml	0	0
01/09/2015 1:00	AMAR371.9.20150901T010031Z.wav_chan0.xml	0	0
01/09/2015 1:08	AMAR371.9.20150901T010831Z.wav_chan0.xml	0	0
01/09/2015 1:16	AMAR371.9.20150901T011631Z.wav_chan0.xml	0	0
01/09/2015 1:24	AMAR371.9.20150901T012431Z.wav_chan0.xml	0	0
01/09/2015 1:32	AMAR371.9.20150901T013231Z.wav_chan0.xml	0	0
01/09/2015 1:40	AMAR371.9.20150901T014031Z.wav_chan0.xml	0	0
01/09/2015 1:48	AMAR371.9.20150901T014831Z.wav_chan0.xml	0	0
01/09/2015 1:56	AMAR371.9.20150901T015631Z.wav_chan0.xml	0	0
01/09/2015 2:04	AMAR371.9.20150901T020431Z.wav_chan0.xml	0	0
01/09/2015 2:12	AMAR371.9.20150901T021231Z.wav_chan0.xml	0	0
01/09/2015 2:20	AMAR371.9.20150901T022031Z.wav_chan0.xml	0	0
01/09/2015 2:28	AMAR371.9.20150901T022831Z.wav_chan0.xml	0	0
01/09/2015 2:36	AMAR371.9.20150901T023631Z.wav_chan0.xml	0	0
01/09/2015 2:44	AMAR371.9.20150901T024431Z.wav_chan0.xml	0	0
01/09/2015 2:52	AMAR371.9.20150901T025231Z.wav_chan0.xml	0	0
01/09/2015 3:00	AMAR371.9.20150901T030031Z.wav_chan0.xml	0	0
01/09/2015 3:08	AMAR371.9.20150901T030831Z.wav_chan0.xml	0	0
01/09/2015 3:16	AMAR371.9.20150901T031631Z.wav_chan0.xml	0	0
01/09/2015 3:24	AMAR371.9.20150901T032431Z.wav_chan0.xml	0	0
01/09/2015 3:32	AMAR371.9.20150901T033231Z.wav_chan0.xml	0	0
01/09/2015 3:40	AMAR371.9.20150901T034031Z.wav_chan0.xml	0	0
01/09/2015 3:48	AMAR371.9.20150901T034831Z.wav_chan0.xml	0	0
01/09/2015 3:56	AMAR371.9.20150901T035631Z.wav_chan0.xml	0	0
01/09/2015 4:04	AMAR371.9.20150901T040431Z.wav_chan0.xml	0	0
01/09/2015 4:12	AMAR371.9.20150901T041231Z.wav_chan0.xml	0	0
01/09/2015 4:20	AMAR371.9.20150901T042031Z.wav_chan0.xml	0	0
01/09/2015 4:28	AMAR371.9.20150901T042831Z.wav_chan0.xml	0	0
01/09/2015 4:36	AMAR371.9.20150901T043631Z.wav_chan0.xml	0	0
01/09/2015 4:44	AMAR371.9.20150901T044431Z.wav_chan0.xml	0	0
01/09/2015 4:52	AMAR371.9.20150901T045231Z.wav_chan0.xml	0	0
01/09/2015 5:00	AMAR371.9.20150901T050031Z.wav_chan0.xml	0	0
01/09/2015 5:08	AMAR371.9.20150901T050831Z.wav_chan0.xml	0	0
01/09/2015 5:16	AMAR371.9.20150901T051631Z.wav_chan0.xml	0	0
01/09/2015 5:24	AMAR371.9.20150901T052431Z.wav_chan0.xml	0	0
01/09/2015 5:32	AMAR371.9.20150901T053231Z.wav_chan0.xml	0	0
01/09/2015 5:40	AMAR371.9.20150901T054031Z.wav_chan0.xml	0	0
01/09/2015 5:48	AMAR371.9.20150901T054831Z.wav_chan0.xml	0	0
01/09/2015 5:56	AMAR371.9.20150901T055631Z.wav_chan0.xml	0	0
01/09/2015 6:04	AMAR371.9.20150901T060431Z.wav_chan0.xml	0	0
01/09/2015 6:12	AMAR371.9.20150901T061231Z.wav_chan0.xml	0	0
01/09/2015 6:20	AMAR371.9.20150901T062031Z.wav_chan0.xml	0	0
01/09/2015 6:28	AMAR371.9.20150901T062831Z.wav_chan0.xml	0	0
01/09/2015 6:36	AMAR371.9.20150901T063631Z.wav_chan0.xml	0	0
01/09/2015 6:44	AMAR371.9.20150901T064431Z.wav_chan0.xml	0	0
01/09/2015 6:52	AMAR371.9.20150901T065231Z.wav_chan0.xml	0	0
01/09/2015 7:00	AMAR371.9.20150901T070031Z.wav_chan0.xml	0	0
01/09/2015 7:08	AMAR371.9.20150901T070831Z.wav_chan0.xml	0	0
01/09/2015 7:16	AMAR371.9.20150901T071631Z.wav_chan0.xml	0	0
01/09/2015 7:24	AMAR371.9.20150901T072431Z.wav_chan0.xml	0	0
01/09/2015 7:32	AMAR371.9.20150901T073231Z.wav_chan0.xml	0	0
01/09/2015 7:40	AMAR371.9.20150901T074031Z.wav_chan0.xml	0	0
01/09/2015 7:48	AMAR371.9.20150901T074831Z.wav_chan0.xml	0	0
01/09/2015 7:56	AMAR371.9.20150901T075631Z.wav_chan0.xml	0	0
01/09/2015 8:04	AMAR371.9.20150901T080431Z.wav_chan0.xml	0	0
01/09/2015 8:12	AMAR371.9.20150901T081231Z.wav_chan0.xml	0	0
01/09/2015 8:20	AMAR371.9.20150901T082031Z.wav_chan0.xml	0	0
01/09/2015 8:28	AMAR371.9.20150901T082831Z.wav_chan0.xml	0	0
01/09/2015 8:36	AMAR371.9.20150901T083631Z.wav_chan0.xml	0	0
01/09/2015 8:44	AMAR371.9.20150901T084431Z.wav_chan0.xml	0	0
01/09/2015 8:52	AMAR371.9.20150901T085231Z.wav_chan0.xml	0	0
01/09/2015 9:00	AMAR371.9.20150901T090031Z.wav_chan0.xml	0	0
01/09/2015 9:08	AMAR371.9.20150901T090831Z.wav_chan0.xml	0	0
01/09/2015 9:16	AMAR371.9.20150901T091631Z.wav_chan0.xml	0	0
01/09/2015 9:24	AMAR371.9.20150901T092431Z.wav_chan0.xml	0	0
01/09/2015 9:32	AMAR371.9.20150901T093231Z.wav_chan0.xml	0	0
01/09/2015 9:40	AMAR371.9.20150901T094031Z.wav_chan0.xml	0	0
01/09/2015 9:48	AMAR371.9.20150901T094831Z.wav_chan0.xml	0	0
01/09/2015 9:56	AMAR371.9.20150901T095631Z.wav_chan0.xml	0	0
01/09/2015 10:04	AMAR371.9.20150901T100431Z.wav_chan0.xml	0	0
01/09/2015 10:12	AMAR371.9.20150901T101231Z.wav_chan0.xml	0	0
01/09/2015 10:20	AMAR371.9.20150901T102031Z.wav_chan0.xml	0	0
01/09/2015 10:28	AMAR371.9.20150901T102831Z.wav_chan0.xml	0	0
01/09/2015 10:36	AMAR371.9.20150901T103631Z.wav_chan0.xml	0	0
01/09/2015 10:44	AMAR371.9.20150901T104431Z.wav_chan0.xml	0	0
01/09/2015 10:52	AMAR371.9.20150901T105231Z.wav_chan0.xml	0	0
01/09/2015 11:00	AMAR371.9.20150901T110031Z.wav_chan0.xml	0	0
01/09/2015 11:08	AMAR371.9.20150901T110831Z.wav_chan0.xml	0	0
01/09/2015 11:16	AMAR371.9.20150901T111631Z.wav_chan0.xml	0	0
01/09/2015 11:24	AMAR371.9.20150901T112431Z.wav_chan0.xml	0	0
01/09/2015 11:32	AMAR371.9.20150901T113231Z.wav_chan0.xml	0	0
01/09/2015 11:40	AMAR371.9.20150901T114031Z.wav_chan0.xml	0	1
01/09/2015 11:48	AMAR371.9.20150901T114831Z.wav_chan0.xml	0	0
01/09/2015 11:56	AMAR371.9.20150901T115631Z.wav_chan0.xml	0	0
01/09/2015 12:04	AMAR371.9.20150901T120431Z.wav_chan0.xml	0	0
01/09/2015 12:12	AMAR371.9.20150901T121231Z.wav_chan0.xml	0	0
01/09/2015 12:20	AMAR371.9.20150901T122031Z.wav_chan0.xml	0	0
01/09/2015 12:28	AMAR371.9.20150901T122831Z.wav_chan0.xml	0	0
01/09/2015 12:36	AMAR371.9.20150901T123631Z.wav_chan0.xml	0	0
01/09/2015 12:44	AMAR371.9.20150901T124431Z.wav_chan0.xml	0	0
01/09/2015 12:52	AMAR371.9.20150901T125231Z.wav_chan0.xml	0	0
01/09/2015 13:00	AMAR371.9.20150901T130031Z.wav_chan0.xml	0	0
01/09/2015 13:08	AMAR371.9.20150901T130831Z.wav_chan0.xml	0	0
01/09/2015 13:16	AMAR371.9.20150901T131631Z.wav_chan0.xml	0	0
01/09/2015 13:24	AMAR371.9.20150901T132431Z.wav_chan0.xml	0	0
01/09/2015 13:32	AMAR371.9.20150901T133231Z.wav_chan0.xml	0	0
01/09/2015 13:40	AMAR371.9.20150901T134031Z.wav_chan0.xml	0	0
01/09/2015 13:48	AMAR371.9.20150901T134831Z.wav_chan0.xml	0	0
01/09/2015 13:56	AMAR371.9.20150901T135631Z.wav_chan0.xml	0	0
01/09/2015 14:04	AMAR371.9.20150901T140431Z.wav_chan0.xml	0	0
01/09/2015 14:12	AMAR371.9.20150901T141231Z.wav_chan0.xml	0	0
01/09/2015 14:20	AMAR371.9.20150901T142031Z.wav_chan0.xml	0	0
01/09/2015 14:28	AMAR371.9.20150901T142831Z.wav_chan0.xml	0	0
01/09/2015 14:36	AMAR371.9.20150901T143631Z.wav_chan0.xml	0	0
01/09/2015 14:44	AMAR371.9.20150901T144431Z.wav_chan0.xml	0	0
01/09/2015 14:52	AMAR371.9.20150901T145231Z.wav_chan0.xml	0	0
01/09/2015 15:00	AMAR371.9.20150901T150031Z.wav_chan0.xml	0	0
01/09/2015 15:08	AMAR371.9.20150901T150831Z.wav_chan0.xml	0	0
01/09/2015 15:16	AMAR371.9.20150901T151631Z.wav_chan0.xml	0	0
01/09/2015 15:24	AMAR371.9.20150901T152431Z.wav_chan0.xml	0	0
01/09/2015 15:32	AMAR371.9.20150901T153231Z.wav_chan0.xml	0	0
01/09/2015 15:40	AMAR371.9.20150901T154031Z.wav_chan0.xml	0	0
01/09/2015 15:48	AMAR371.9.20150901T154831Z.wav_chan0.xml	0	0
01/09/2015 15:56	AMAR371.9.20150901T155631Z.wav_chan0.xml	0	0
01/09/2015 16:04	AMAR371.9.20150901T160431Z.wav_chan0.xml	0	0
01/09/2015 16:12	AMAR371.9.20150901T161231Z.wav_chan0.xml	0	0
01/09/2015 16:20	AMAR371.9.20150901T162031Z.wav_chan0.xml	0	0
01/09/2015 16:28	AMAR371.9.20150901T162831Z.wav_chan0.xml	0	1
01/09/2015 16:36	AMAR371.9.20150901T163631Z.wav_chan0.xml	0	0
01/09/2015 16:44	AMAR371.9.20150901T164431Z.wav_chan0.xml	0	0
01/09/2015 16:52	AMAR371.9.20150901T165231Z.wav_chan0.xml	0	0
01/09/2015 17:00	AMAR371.9.20150901T170031Z.wav_chan0.xml	0	0
01/09/2015 17:08	AMAR371.9.20150901T170831Z.wav_chan0.xml	0	0
01/09/2015 17:16	AMAR371.9.20150901T171631Z.wav_chan0.xml	0	0
01/09/2015 17:24	AMAR371.9.20150901T172431Z.wav_chan0.xml	0	0
01/09/2015 17:32	AMAR371.9.20150901T173231Z.wav_chan0.xml	0	0
01/09/2015 17:40	AMAR371.9.20150901T174031Z.wav_chan0.xml	0	0
01/09/2015 17:48	AMAR371.9.20150901T174831Z.wav_chan0.xml	0	0
01/09/2015 17:56	AMAR371.9.20150901T175631Z.wav_chan0.xml	0	0
01/09/2015 18:04	AMAR371.9.20150901T180431Z.wav_chan0.xml	0	0
01/09/2015 18:12	AMAR371.9.20150901T181231Z.wav_chan0.xml	0	0
01/09/2015 18:20	AMAR371.9.20150901T182031Z.wav_chan0.xml	0	0
01/09/2015 18:28	AMAR371.9.20150901T182831Z.wav_chan0.xml	0	0
01/09/2015 18:36	AMAR371.9.20150901T183631Z.wav_chan0.xml	0	0
01/09/2015 18:44	AMAR371.9.20150901T184431Z.wav_chan0.xml	0	0
01/09/2015 18:52	AMAR371.9.20150901T185231Z.wav_chan0.xml	0	0
01/09/2015 19:00	AMAR371.9.20150901T190031Z.wav_chan0.xml	0	0
01/09/2015 19:08	AMAR371.9.20150901T190831Z.wav_chan0.xml	0	0
01/09/2015 19:16	AMAR371.9.20150901T191631Z.wav_chan0.xml	0	0
01/09/2015 19:24	AMAR371.9.20150901T192431Z.wav_chan0.xml	0	0
01/09/2015 19:32	AMAR371.9.20150901T193231Z.wav_chan0.xml	0	0
01/09/2015 19:40	AMAR371.9.20150901T194031Z.wav_chan0.xml	0	0
01/09/2015 19:48	AMAR371.9.20150901T194831Z.wav_chan0.xml	0	0
01/09/2015 19:56	AMAR371.9.20150901T195631Z.wav_chan0.xml	0	0
01/09/2015 20:04	AMAR371.9.20150901T200431Z.wav_chan0.xml	0	0
01/09/2015 20:12	AMAR371.9.20150901T201231Z.wav_chan0.xml	0	0
01/09/2015 20:20	AMAR371.9.20150901T202031Z.wav_chan0.xml	0	0
01/09/2015 20:28	AMAR371.9.20150901T202831Z.wav_chan0.xml	0	0
01/09/2015 20:36	AMAR371.9.20150901T203631Z.wav_chan0.xml	0	0
01/09/2015 20:44	AMAR371.9.20150901T204431Z.wav_chan0.xml	0	0
01/09/2015 20:52	AMAR371.9.20150901T205231Z.wav_chan0.xml	0	0
01/09/2015 21:00	AMAR371.9.20150901T210031Z.wav_chan0.xml	0	0
01/09/2015 21:08	AMAR371.9.20150901T210831Z.wav_chan0.xml	0	0
01/09/2015 21:16	AMAR371.9.20150901T211631Z.wav_chan0.xml	0	0
01/09/2015 21:24	AMAR371.9.20150901T212431Z.wav_chan0.xml	0	0
01/09/2015 21:32	AMAR371.9.20150901T213231Z.wav_chan0.xml	0	0
01/09/2015 21:40	AMAR371.9.20150901T214031Z.wav_chan0.xml	0	1
01/09/2015 21:48	AMAR371.9.20150901T214831Z.wav_chan0.xml	0	2
01/09/2015 21:56	AMAR371.9.20150901T215631Z.wav_chan0.xml	0	0
01/09/2015 22:04	AMAR371.9.20150901T220431Z.wav_chan0.xml	0	0
01/09/2015 22:12	AMAR371.9.20150901T221231Z.wav_chan0.xml	0	0
01/09/2015 22:20	AMAR371.9.20150901T222031Z.wav_chan0.xml	0	0
01/09/2015 22:28	AMAR371.9.20150901T222831Z.wav_chan0.xml	0	0
01/09/2015 22:36	AMAR371.9.20150901T223631Z.wav_chan0.xml	1	0
01/09/2015 22:44	AMAR371.9.20150901T224431Z.wav_chan0.xml	0	1
01/09/2015 22:52	AMAR371.9.20150901T225231Z.wav_chan0.xml	0	0
01/09/2015 23:00	AMAR371.9.20150901T230031Z.wav_chan0.xml	0	0
01/09/2015 23:08	AMAR371.9.20150901T230831Z.wav_chan0.xml	0	0
01/09/2015 23:16	AMAR371.9.20150901T231631Z.wav_chan0.xml	0	0
01/09/2015 23:24	AMAR371.9.20150901T232431Z.wav_chan0.xml	0	0
01/09/2015 23:32	AMAR371.9.20150901T233231Z.wav_chan0.xml	0	0
01/09/2015 23:40	AMAR371.9.20150901T234031Z.wav_chan0.xml	0	0
01/09/2015 23:48	AMAR371.9.20150901T234831Z.wav_chan0.xml	0	0
01/09/2015 23:56	AMAR371.9.20150901T235631Z.wav_chan0.xml	0	0
02/12/2015 0:04	AMAR371.9.20151202T000431Z.wav_chan0.xml	0	0
02/12/2015 0:12	AMAR371.9.20151202T001231Z.wav_chan0.xml	0	0
02/12/2015 0:20	AMAR371.9.20151202T002031Z.wav_chan0.xml	0	0
02/12/2015 0:28	AMAR371.9.20151202T002831Z.wav_chan0.xml	0	0
02/12/2015 0:36	AMAR371.9.20151202T003631Z.wav_chan0.xml	0	0
02/12/2015 0:44	AMAR371.9.20151202T004431Z.wav_chan0.xml	0	0
02/12/2015 0:52	AMAR371.9.20151202T005231Z.wav_chan0.xml	0	0
02/12/2015 1:00	AMAR371.9.20151202T010031Z.wav_chan0.xml	0	0
02/12/2015 1:08	AMAR371.9.20151202T010831Z.wav_chan0.xml	0	0
02/12/2015 1:16	AMAR371.9.20151202T011631Z.wav_chan0.xml	0	0
02/12/2015 1:24	AMAR371.9.20151202T012431Z.wav_chan0.xml	0	0
02/12/2015 1:32	AMAR371.9.20151202T013231Z.wav_chan0.xml	0	0
02/12/2015 1:40	AMAR371.9.20151202T014031Z.wav_chan0.xml	0	0
02/12/2015 1:48	AMAR371.9.20151202T014831Z.wav_chan0.xml	0	0
02/12/2015 1:56	AMAR371.9.20151202T015631Z.wav_chan0.xml	0	0
02/12/2015 2:04	AMAR371.9.20151202T020431Z.wav_chan0.xml	0	0
02/12/2015 2:12	AMAR371.9.20151202T021231Z.wav_chan0.xml	0	0
02/12/2015 2:20	AMAR371.9.20151202T022031Z.wav_chan0.xml	0	0
02/12/2015 2:28	AMAR371.9.20151202T022831Z.wav_chan0.xml	0	0
02/12/2015 2:36	AMAR371.9.20151202T023631Z.wav_chan0.xml	0	0
02/12/2015 2:44	AMAR371.9.20151202T024431Z.wav_chan0.xml	0	0
02/12/2015 2:52	AMAR371.9.20151202T025231Z.wav_chan0.xml	0	0
02/12/2015 3:00	AMAR371.9.20151202T030031Z.wav_chan0.xml	0	0
02/12/2015 3:08	AMAR371.9.20151202T030831Z.wav_chan0.xml	0	0
02/12/2015 3:16	AMAR371.9.20151202T031631Z.wav_chan0.xml	0	0
02/12/2015 3:24	AMAR371.9.20151202T032431Z.wav_chan0.xml	0	0
02/12/2015 3:32	AMAR371.9.20151202T033231Z.wav_chan0.xml	0	0
02/12/2015 3:40	AMAR371.9.20151202T034031Z.wav_chan0.xml	0	0
02/12/2015 3:48	AMAR371.9.20151202T034831Z.wav_chan0.xml	0	0
02/12/2015 3:56	AMAR371.9.20151202T035631Z.wav_chan0.xml	0	0
02/12/2015 4:04	AMAR371.9.20151202T040431Z.wav_chan0.xml	0	0
02/12/2015 4:12	AMAR371.9.20151202T041231Z.wav_chan0.xml	0	0
02/12/2015 4:20	AMAR371.9.20151202T042031Z.wav_chan0.xml	0	0
02/12/2015 4:28	AMAR371.9.20151202T042831Z.wav_chan0.xml	0	0
02/12/2015 4:36	AMAR371.9.20151202T043631Z.wav_chan0.xml	0	0
02/12/2015 4:44	AMAR371.9.20151202T044431Z.wav_chan0.xml	0	0
02/12/2015 4:52	AMAR371.9.20151202T045231Z.wav_chan0.xml	0	0
02/12/2015 5:00	AMAR371.9.20151202T050031Z.wav_chan0.xml	0	0
02/12/2015 5:08	AMAR371.9.20151202T050831Z.wav_chan0.xml	0	0
02/12/2015 5:16	AMAR371.9.20151202T051631Z.wav_chan0.xml	0	0
02/12/2015 5:24	AMAR371.9.20151202T052431Z.wav_chan0.xml	0	0
02/12/2015 5:32	AMAR371.9.20151202T053231Z.wav_chan0.xml	0	0
02/12/2015 5:40	AMAR371.9.20151202T054031Z.wav_chan0.xml	0	0
02/12/2015 5:48	AMAR371.9.20151202T054831Z.wav_chan0.xml	0	0
02/12/2015 5:56	AMAR371.9.20151202T055631Z.wav_chan0.xml	0	0
02/12/2015 6:04	AMAR371.9.20151202T060431Z.wav_chan0.xml	0	0
02/12/2015 6:12	AMAR371.9.20151202T061231Z.wav_chan0.xml	0	0
02/12/2015 6:20	AMAR371.9.20151202T062031Z.wav_chan0.xml	0	0
02/12/2015 6:28	AMAR371.9.20151202T062831Z.wav_chan0.xml	0	0
02/12/2015 6:36	AMAR371.9.20151202T063631Z.wav_chan0.xml	0	0
02/12/2015 6:44	AMAR371.9.20151202T064431Z.wav_chan0.xml	0	0
02/12/2015 6:52	AMAR371.9.20151202T065231Z.wav_chan0.xml	0	0
02/12/2015 7:00	AMAR371.9.20151202T070031Z.wav_chan0.xml	0	0
02/12/2015 7:08	AMAR371.9.20151202T070831Z.wav_chan0.xml	0	0
02/12/2015 7:16	AMAR371.9.20151202T071631Z.wav_chan0.xml	0	0
02/12/2015 7:24	AMAR371.9.20151202T072431Z.wav_chan0.xml	0	0
02/12/2015 7:32	AMAR371.9.20151202T073231Z.wav_chan0.xml	0	0
02/12/2015 7:40	AMAR371.9.20151202T074031Z.wav_chan0.xml	0	0
02/12/2015 7:48	AMAR371.9.20151202T074831Z.wav_chan0.xml	0	0
02/12/2015 7:56	AMAR371.9.20151202T075631Z.wav_chan0.xml	0	0
02/12/2015 8:04	AMAR371.9.20151202T080431Z.wav_chan0.xml	8	0
02/12/2015 8:12	AMAR371.9.20151202T081231Z.wav_chan0.xml	0	0
02/12/2015 8:20	AMAR371.9.20151202T082031Z.wav_chan0.xml	0	0
02/12/2015 8:28	AMAR371.9.20151202T082831Z.wav_chan0.xml	0	0
02/12/2015 8:36	AMAR371.9.20151202T083631Z.wav_chan0.xml	0	0
02/12/2015 8:44	AMAR371.9.20151202T084431Z.wav_chan0.xml	0	0
02/12/2015 8:52	AMAR371.9.20151202T085231Z.wav_chan0.xml	0	0
02/12/2015 9:00	AMAR371.9.20151202T090031Z.wav_chan0.xml	0	0
02/12/2015 9:08	AMAR371.9.20151202T090831Z.wav_chan0.xml	0	0
02/12/2015 9:16	AMAR371.9.20151202T091631Z.wav_chan0.xml	0	0
02/12/2015 9:24	AMAR371.9.20151202T092431Z.wav_chan0.xml	0	0
02/12/2015 9:32	AMAR371.9.20151202T093231Z.wav_chan0.xml	0	0
02/12/2015 9:40	AMAR371.9.20151202T094031Z.wav_chan0.xml	0	0
02/12/2015 9:48	AMAR371.9.20151202T094831Z.wav_chan0.xml	0	0
02/12/2015 9:56	AMAR371.9.20151202T095631Z.wav_chan0.xml	0	0
02/12/2015 10:04	AMAR371.9.20151202T100431Z.wav_chan0.xml	0	0
02/12/2015 10:12	AMAR371.9.20151202T101231Z.wav_chan0.xml	0	0
02/12/2015 10:20	AMAR371.9.20151202T102031Z.wav_chan0.xml	0	0
02/12/2015 10:28	AMAR371.9.20151202T102831Z.wav_chan0.xml	0	0
02/12/2015 10:36	AMAR371.9.20151202T103631Z.wav_chan0.xml	0	0
02/12/2015 10:44	AMAR371.9.20151202T104431Z.wav_chan0.xml	0	0
02/12/2015 10:52	AMAR371.9.20151202T105231Z.wav_chan0.xml	0	0
02/12/2015 11:00	AMAR371.9.20151202T110031Z.wav_chan0.xml	0	0
02/12/2015 11:08	AMAR371.9.20151202T110831Z.wav_chan0.xml	0	0
02/12/2015 11:16	AMAR371.9.20151202T111631Z.wav_chan0.xml	0	0
02/12/2015 11:24	AMAR371.9.20151202T112431Z.wav_chan0.xml	0	0
02/12/2015 11:32	AMAR371.9.20151202T113231Z.wav_chan0.xml	0	0
02/12/2015 11:40	AMAR371.9.20151202T114031Z.wav_chan0.xml	0	0
02/12/2015 11:48	AMAR371.9.20151202T114831Z.wav_chan0.xml	0	0
02/12/2015 11:56	AMAR371.9.20151202T115631Z.wav_chan0.xml	0	0
02/12/2015 12:04	AMAR371.9.20151202T120431Z.wav_chan0.xml	1	0
02/12/2015 12:12	AMAR371.9.20151202T121231Z.wav_chan0.xml	0	0
02/12/2015 12:20	AMAR371.9.20151202T122031Z.wav_chan0.xml	0	0
02/12/2015 12:28	AMAR371.9.20151202T122831Z.wav_chan0.xml	0	0
02/12/2015 12:36	AMAR371.9.20151202T123631Z.wav_chan0.xml	0	0
02/12/2015 12:44	AMAR371.9.20151202T124431Z.wav_chan0.xml	0	0
02/12/2015 12:52	AMAR371.9.20151202T125231Z.wav_chan0.xml	0	0
02/12/2015 13:00	AMAR371.9.20151202T130031Z.wav_chan0.xml	0	0
02/12/2015 13:08	AMAR371.9.20151202T130831Z.wav_chan0.xml	0	0
02/12/2015 13:16	AMAR371.9.20151202T131631Z.wav_chan0.xml	0	0
02/12/2015 13:24	AMAR371.9.20151202T132431Z.wav_chan0.xml	0	0
02/12/2015 13:32	AMAR371.9.20151202T133231Z.wav_chan0.xml	0	0
02/12/2015 13:40	AMAR371.9.20151202T134031Z.wav_chan0.xml	0	0
02/12/2015 13:48	AMAR371.9.20151202T134831Z.wav_chan0.xml	0	0
02/12/2015 13:56	AMAR371.9.20151202T135631Z.wav_chan0.xml	0	0
02/12/2015 14:04	AMAR371.9.20151202T140431Z.wav_chan0.xml	0	0
02/12/2015 14:12	AMAR371.9.20151202T141231Z.wav_chan0.xml	0	0
02/12/2015 14:20	AMAR371.9.20151202T142031Z.wav_chan0.xml	0	0
02/12/2015 14:28	AMAR371.9.20151202T142831Z.wav_chan0.xml	0	0
02/12/2015 14:36	AMAR371.9.20151202T143631Z.wav_chan0.xml	0	0
02/12/2015 14:44	AMAR371.9.20151202T144431Z.wav_chan0.xml	0	0
02/12/2015 14:52	AMAR371.9.20151202T145231Z.wav_chan0.xml	0	0
02/12/2015 15:00	AMAR371.9.20151202T150031Z.wav_chan0.xml	0	0
02/12/2015 15:08	AMAR371.9.20151202T150831Z.wav_chan0.xml	0	0
02/12/2015 15:16	AMAR371.9.20151202T151631Z.wav_chan0.xml	0	0
02/12/2015 15:24	AMAR371.9.20151202T152431Z.wav_chan0.xml	0	0
02/12/2015 15:32	AMAR371.9.20151202T153231Z.wav_chan0.xml	0	0
02/12/2015 15:40	AMAR371.9.20151202T154031Z.wav_chan0.xml	0	0
02/12/2015 15:48	AMAR371.9.20151202T154831Z.wav_chan0.xml	0	0
02/12/2015 15:56	AMAR371.9.20151202T155631Z.wav_chan0.xml	0	0
02/12/2015 16:04	AMAR371.9.20151202T160431Z.wav_chan0.xml	0	0
02/12/2015 16:12	AMAR371.9.20151202T161231Z.wav_chan0.xml	0	0
02/12/2015 16:20	AMAR371.9.20151202T162031Z.wav_chan0.xml	0	0
02/12/2015 16:28	AMAR371.9.20151202T162831Z.wav_chan0.xml	0	0
02/12/2015 16:36	AMAR371.9.20151202T163631Z.wav_chan0.xml	0	0
02/12/2015 16:44	AMAR371.9.20151202T164431Z.wav_chan0.xml	0	0
02/12/2015 16:52	AMAR371.9.20151202T165231Z.wav_chan0.xml	0	0
02/12/2015 17:00	AMAR371.9.20151202T170031Z.wav_chan0.xml	0	0
02/12/2015 17:08	AMAR371.9.20151202T170831Z.wav_chan0.xml	0	0
02/12/2015 17:16	AMAR371.9.20151202T171631Z.wav_chan0.xml	0	0
02/12/2015 17:24	AMAR371.9.20151202T172431Z.wav_chan0.xml	0	0
02/12/2015 17:32	AMAR371.9.20151202T173231Z.wav_chan0.xml	0	0
02/12/2015 17:40	AMAR371.9.20151202T174031Z.wav_chan0.xml	0	0
02/12/2015 17:48	AMAR371.9.20151202T174831Z.wav_chan0.xml	0	0
02/12/2015 17:56	AMAR371.9.20151202T175631Z.wav_chan0.xml	1	1
02/12/2015 18:04	AMAR371.9.20151202T180431Z.wav_chan0.xml	0	1
02/12/2015 18:12	AMAR371.9.20151202T181231Z.wav_chan0.xml	0	0
02/12/2015 18:20	AMAR371.9.20151202T182031Z.wav_chan0.xml	0	0
02/12/2015 18:28	AMAR371.9.20151202T182831Z.wav_chan0.xml	0	0
02/12/2015 18:36	AMAR371.9.20151202T183631Z.wav_chan0.xml	0	0
02/12/2015 18:44	AMAR371.9.20151202T184431Z.wav_chan0.xml	0	0
02/12/2015 18:52	AMAR371.9.20151202T185231Z.wav_chan0.xml	0	0
02/12/2015 19:00	AMAR371.9.20151202T190031Z.wav_chan0.xml	7	0
02/12/2015 19:08	AMAR371.9.20151202T190831Z.wav_chan0.xml	0	0
02/12/2015 19:16	AMAR371.9.20151202T191631Z.wav_chan0.xml	0	0
02/12/2015 19:24	AMAR371.9.20151202T192431Z.wav_chan0.xml	0	0
02/12/2015 19:32	AMAR371.9.20151202T193231Z.wav_chan0.xml	0	0
02/12/2015 19:40	AMAR371.9.20151202T194031Z.wav_chan0.xml	0	0
02/12/2015 19:48	AMAR371.9.20151202T194831Z.wav_chan0.xml	0	0
02/12/2015 19:56	AMAR371.9.20151202T195631Z.wav_chan0.xml	0	0
02/12/2015 20:04	AMAR371.9.20151202T200431Z.wav_chan0.xml	0	0
02/12/2015 20:12	AMAR371.9.20151202T201231Z.wav_chan0.xml	0	0
02/12/2015 20:20	AMAR371.9.20151202T202031Z.wav_chan0.xml	0	0
02/12/2015 20:28	AMAR371.9.20151202T202831Z.wav_chan0.xml	0	0
02/12/2015 20:36	AMAR371.9.20151202T203631Z.wav_chan0.xml	0	0
02/12/2015 20:44	AMAR371.9.20151202T204431Z.wav_chan0.xml	0	0
02/12/2015 20:52	AMAR371.9.20151202T205231Z.wav_chan0.xml	0	0
02/12/2015 21:00	AMAR371.9.20151202T210031Z.wav_chan0.xml	0	0
02/12/2015 21:08	AMAR371.9.20151202T210831Z.wav_chan0.xml	0	0
02/12/2015 21:16	AMAR371.9.20151202T211631Z.wav_chan0.xml	0	0
02/12/2015 21:24	AMAR371.9.20151202T212431Z.wav_chan0.xml	0	0
02/12/2015 21:32	AMAR371.9.20151202T213231Z.wav_chan0.xml	0	0
02/12/2015 21:40	AMAR371.9.20151202T214031Z.wav_chan0.xml	0	0
02/12/2015 21:48	AMAR371.9.20151202T214831Z.wav_chan0.xml	0	0
02/12/2015 21:56	AMAR371.9.20151202T215631Z.wav_chan0.xml	0	0
02/12/2015 22:04	AMAR371.9.20151202T220431Z.wav_chan0.xml	0	0
02/12/2015 22:12	AMAR371.9.20151202T221231Z.wav_chan0.xml	0	0
02/12/2015 22:20	AMAR371.9.20151202T222031Z.wav_chan0.xml	0	0
02/12/2015 22:28	AMAR371.9.20151202T222831Z.wav_chan0.xml	0	0
02/12/2015 22:36	AMAR371.9.20151202T223631Z.wav_chan0.xml	0	0
02/12/2015 22:44	AMAR371.9.20151202T224431Z.wav_chan0.xml	0	0
02/12/2015 22:52	AMAR371.9.20151202T225231Z.wav_chan0.xml	0	0
02/12/2015 23:00	AMAR371.9.20151202T230031Z.wav_chan0.xml	0	0
02/12/2015 23:08	AMAR371.9.20151202T230831Z.wav_chan0.xml	0	0
02/12/2015 23:16	AMAR371.9.20151202T231631Z.wav_chan0.xml	0	0
02/12/2015 23:24	AMAR371.9.20151202T232431Z.wav_chan0.xml	0	0
02/12/2015 23:32	AMAR371.9.20151202T233231Z.wav_chan0.xml	0	0
02/12/2015 23:40	AMAR371.9.20151202T234031Z.wav_chan0.xml	0	0
02/12/2015 23:48	AMAR371.9.20151202T234831Z.wav_chan0.xml	0	0
02/12/2015 23:56	AMAR371.9.20151202T235631Z.wav_chan0.xml	0	0
02/11/2015 0:04	AMAR371.9.20151102T000431Z.wav_chan0.xml	0	0
02/11/2015 0:12	AMAR371.9.20151102T001231Z.wav_chan0.xml	0	0
02/11/2015 0:20	AMAR371.9.20151102T002031Z.wav_chan0.xml	0	0
02/11/2015 0:28	AMAR371.9.20151102T002831Z.wav_chan0.xml	0	0
02/11/2015 0:36	AMAR371.9.20151102T003631Z.wav_chan0.xml	0	0
02/11/2015 0:44	AMAR371.9.20151102T004431Z.wav_chan0.xml	0	0
02/11/2015 0:52	AMAR371.9.20151102T005231Z.wav_chan0.xml	0	0
02/11/2015 1:00	AMAR371.9.20151102T010031Z.wav_chan0.xml	0	0
02/11/2015 1:08	AMAR371.9.20151102T010831Z.wav_chan0.xml	0	0
02/11/2015 1:16	AMAR371.9.20151102T011631Z.wav_chan0.xml	0	0
02/11/2015 1:24	AMAR371.9.20151102T012431Z.wav_chan0.xml	0	0
02/11/2015 1:32	AMAR371.9.20151102T013231Z.wav_chan0.xml	0	0
02/11/2015 1:40	AMAR371.9.20151102T014031Z.wav_chan0.xml	0	0
02/11/2015 1:48	AMAR371.9.20151102T014831Z.wav_chan0.xml	0	0
02/11/2015 1:56	AMAR371.9.20151102T015631Z.wav_chan0.xml	2	0
02/11/2015 2:04	AMAR371.9.20151102T020431Z.wav_chan0.xml	0	0
02/11/2015 2:12	AMAR371.9.20151102T021231Z.wav_chan0.xml	9	0
02/11/2015 2:20	AMAR371.9.20151102T022031Z.wav_chan0.xml	0	0
02/11/2015 2:28	AMAR371.9.20151102T022831Z.wav_chan0.xml	0	0
02/11/2015 2:36	AMAR371.9.20151102T023631Z.wav_chan0.xml	0	0
02/11/2015 2:44	AMAR371.9.20151102T024431Z.wav_chan0.xml	0	0
02/11/2015 2:52	AMAR371.9.20151102T025231Z.wav_chan0.xml	0	0
02/11/2015 3:00	AMAR371.9.20151102T030031Z.wav_chan0.xml	0	0
02/11/2015 3:08	AMAR371.9.20151102T030831Z.wav_chan0.xml	0	0
02/11/2015 3:16	AMAR371.9.20151102T031631Z.wav_chan0.xml	0	0
02/11/2015 3:24	AMAR371.9.20151102T032431Z.wav_chan0.xml	0	0
02/11/2015 3:32	AMAR371.9.20151102T033231Z.wav_chan0.xml	0	0
02/11/2015 3:40	AMAR371.9.20151102T034031Z.wav_chan0.xml	0	0
02/11/2015 3:48	AMAR371.9.20151102T034831Z.wav_chan0.xml	0	0
02/11/2015 3:56	AMAR371.9.20151102T035631Z.wav_chan0.xml	0	0
02/11/2015 4:04	AMAR371.9.20151102T040431Z.wav_chan0.xml	0	0
02/11/2015 4:12	AMAR371.9.20151102T041231Z.wav_chan0.xml	0	0
02/11/2015 4:20	AMAR371.9.20151102T042031Z.wav_chan0.xml	0	0
02/11/2015 4:28	AMAR371.9.20151102T042831Z.wav_chan0.xml	0	0
02/11/2015 4:36	AMAR371.9.20151102T043631Z.wav_chan0.xml	0	0
02/11/2015 4:44	AMAR371.9.20151102T044431Z.wav_chan0.xml	0	0
02/11/2015 4:52	AMAR371.9.20151102T045231Z.wav_chan0.xml	0	0
02/11/2015 5:00	AMAR371.9.20151102T050031Z.wav_chan0.xml	0	0
02/11/2015 5:08	AMAR371.9.20151102T050831Z.wav_chan0.xml	0	0
02/11/2015 5:16	AMAR371.9.20151102T051631Z.wav_chan0.xml	0	0
02/11/2015 5:24	AMAR371.9.20151102T052431Z.wav_chan0.xml	0	0
02/11/2015 5:32	AMAR371.9.20151102T053231Z.wav_chan0.xml	0	0
02/11/2015 5:40	AMAR371.9.20151102T054031Z.wav_chan0.xml	0	0
02/11/2015 5:48	AMAR371.9.20151102T054831Z.wav_chan0.xml	0	0
02/11/2015 5:56	AMAR371.9.20151102T055631Z.wav_chan0.xml	0	0
02/11/2015 6:04	AMAR371.9.20151102T060431Z.wav_chan0.xml	0	0
02/11/2015 6:12	AMAR371.9.20151102T061231Z.wav_chan0.xml	0	0
02/11/2015 6:20	AMAR371.9.20151102T062031Z.wav_chan0.xml	0	0
02/11/2015 6:28	AMAR371.9.20151102T062831Z.wav_chan0.xml	0	0
02/11/2015 6:36	AMAR371.9.20151102T063631Z.wav_chan0.xml	0	0
02/11/2015 6:44	AMAR371.9.20151102T064431Z.wav_chan0.xml	0	0
02/11/2015 6:52	AMAR371.9.20151102T065231Z.wav_chan0.xml	0	0
02/11/2015 7:00	AMAR371.9.20151102T070031Z.wav_chan0.xml	0	0
02/11/2015 7:08	AMAR371.9.20151102T070831Z.wav_chan0.xml	0	0
02/11/2015 7:16	AMAR371.9.20151102T071631Z.wav_chan0.xml	0	0
02/11/2015 7:24	AMAR371.9.20151102T072431Z.wav_chan0.xml	0	0
02/11/2015 7:32	AMAR371.9.20151102T073231Z.wav_chan0.xml	0	0
02/11/2015 7:40	AMAR371.9.20151102T074031Z.wav_chan0.xml	0	0
02/11/2015 7:48	AMAR371.9.20151102T074831Z.wav_chan0.xml	0	0
02/11/2015 7:56	AMAR371.9.20151102T075631Z.wav_chan0.xml	0	0
02/11/2015 8:04	AMAR371.9.20151102T080431Z.wav_chan0.xml	0	0
02/11/2015 8:12	AMAR371.9.20151102T081231Z.wav_chan0.xml	0	0
02/11/2015 8:20	AMAR371.9.20151102T082031Z.wav_chan0.xml	0	0
02/11/2015 8:28	AMAR371.9.20151102T082831Z.wav_chan0.xml	0	0
02/11/2015 8:36	AMAR371.9.20151102T083631Z.wav_chan0.xml	0	1
02/11/2015 8:44	AMAR371.9.20151102T084431Z.wav_chan0.xml	0	0
02/11/2015 8:52	AMAR371.9.20151102T085231Z.wav_chan0.xml	0	0
02/11/2015 9:00	AMAR371.9.20151102T090031Z.wav_chan0.xml	0	0
02/11/2015 9:08	AMAR371.9.20151102T090831Z.wav_chan0.xml	0	0
02/11/2015 9:16	AMAR371.9.20151102T091631Z.wav_chan0.xml	0	0
02/11/2015 9:24	AMAR371.9.20151102T092431Z.wav_chan0.xml	0	0
02/11/2015 9:32	AMAR371.9.20151102T093231Z.wav_chan0.xml	0	0
02/11/2015 9:40	AMAR371.9.20151102T094031Z.wav_chan0.xml	0	0
02/11/2015 9:48	AMAR371.9.20151102T094831Z.wav_chan0.xml	0	0
02/11/2015 9:56	AMAR371.9.20151102T095631Z.wav_chan0.xml	0	0
02/11/2015 10:04	AMAR371.9.20151102T100431Z.wav_chan0.xml	0	0
02/11/2015 10:12	AMAR371.9.20151102T101231Z.wav_chan0.xml	0	0
02/11/2015 10:20	AMAR371.9.20151102T102031Z.wav_chan0.xml	0	0
02/11/2015 10:28	AMAR371.9.20151102T102831Z.wav_chan0.xml	0	0
02/11/2015 10:36	AMAR371.9.20151102T103631Z.wav_chan0.xml	0	0
02/11/2015 10:44	AMAR371.9.20151102T104431Z.wav_chan0.xml	0	0
02/11/2015 10:52	AMAR371.9.20151102T105231Z.wav_chan0.xml	0	0
02/11/2015 11:00	AMAR371.9.20151102T110031Z.wav_chan0.xml	0	0
02/11/2015 11:08	AMAR371.9.20151102T110831Z.wav_chan0.xml	0	0
02/11/2015 11:16	AMAR371.9.20151102T111631Z.wav_chan0.xml	0	0
02/11/2015 11:24	AMAR371.9.20151102T112431Z.wav_chan0.xml	3	0
02/11/2015 11:32	AMAR371.9.20151102T113231Z.wav_chan0.xml	0	0
02/11/2015 11:40	AMAR371.9.20151102T114031Z.wav_chan0.xml	0	0
02/11/2015 11:48	AMAR371.9.20151102T114831Z.wav_chan0.xml	0	0
02/11/2015 11:56	AMAR371.9.20151102T115631Z.wav_chan0.xml	0	0
02/11/2015 12:04	AMAR371.9.20151102T120431Z.wav_chan0.xml	0	0
02/11/2015 12:12	AMAR371.9.20151102T121231Z.wav_chan0.xml	0	0
02/11/2015 12:20	AMAR371.9.20151102T122031Z.wav_chan0.xml	0	0
02/11/2015 12:28	AMAR371.9.20151102T122831Z.wav_chan0.xml	0	0
02/11/2015 12:36	AMAR371.9.20151102T123631Z.wav_chan0.xml	0	0
02/11/2015 12:44	AMAR371.9.20151102T124431Z.wav_chan0.xml	0	0
02/11/2015 12:52	AMAR371.9.20151102T125231Z.wav_chan0.xml	0	0
02/11/2015 13:00	AMAR371.9.20151102T130031Z.wav_chan0.xml	0	0
02/11/2015 13:08	AMAR371.9.20151102T130831Z.wav_chan0.xml	0	0
02/11/2015 13:16	AMAR371.9.20151102T131631Z.wav_chan0.xml	0	0
02/11/2015 13:24	AMAR371.9.20151102T132431Z.wav_chan0.xml	0	0
02/11/2015 13:32	AMAR371.9.20151102T133231Z.wav_chan0.xml	0	0
02/11/2015 13:40	AMAR371.9.20151102T134031Z.wav_chan0.xml	0	0
02/11/2015 13:48	AMAR371.9.20151102T134831Z.wav_chan0.xml	0	0
02/11/2015 13:56	AMAR371.9.20151102T135631Z.wav_chan0.xml	0	0
02/11/2015 14:04	AMAR371.9.20151102T140431Z.wav_chan0.xml	0	0
02/11/2015 14:12	AMAR371.9.20151102T141231Z.wav_chan0.xml	0	0
02/11/2015 14:20	AMAR371.9.20151102T142031Z.wav_chan0.xml	0	0
02/11/2015 14:28	AMAR371.9.20151102T142831Z.wav_chan0.xml	0	0
02/11/2015 14:36	AMAR371.9.20151102T143631Z.wav_chan0.xml	0	0
02/11/2015 14:44	AMAR371.9.20151102T144431Z.wav_chan0.xml	0	0
02/11/2015 14:52	AMAR371.9.20151102T145231Z.wav_chan0.xml	0	0
02/11/2015 15:00	AMAR371.9.20151102T150031Z.wav_chan0.xml	0	0
02/11/2015 15:08	AMAR371.9.20151102T150831Z.wav_chan0.xml	0	0
02/11/2015 15:16	AMAR371.9.20151102T151631Z.wav_chan0.xml	0	0
02/11/2015 15:24	AMAR371.9.20151102T152431Z.wav_chan0.xml	0	0
02/11/2015 15:32	AMAR371.9.20151102T153231Z.wav_chan0.xml	0	0
02/11/2015 15:40	AMAR371.9.20151102T154031Z.wav_chan0.xml	0	0
02/11/2015 15:48	AMAR371.9.20151102T154831Z.wav_chan0.xml	0	0
02/11/2015 15:56	AMAR371.9.20151102T155631Z.wav_chan0.xml	0	0
02/11/2015 16:04	AMAR371.9.20151102T160431Z.wav_chan0.xml	0	0
02/11/2015 16:12	AMAR371.9.20151102T161231Z.wav_chan0.xml	0	0
02/11/2015 16:20	AMAR371.9.20151102T162031Z.wav_chan0.xml	0	0
02/11/2015 16:28	AMAR371.9.20151102T162831Z.wav_chan0.xml	0	0
02/11/2015 16:36	AMAR371.9.20151102T163631Z.wav_chan0.xml	0	0
02/11/2015 16:44	AMAR371.9.20151102T164431Z.wav_chan0.xml	0	0
02/11/2015 16:52	AMAR371.9.20151102T165231Z.wav_chan0.xml	0	0
02/11/2015 17:00	AMAR371.9.20151102T170031Z.wav_chan0.xml	0	0
02/11/2015 17:08	AMAR371.9.20151102T170831Z.wav_chan0.xml	0	0
02/11/2015 17:16	AMAR371.9.20151102T171631Z.wav_chan0.xml	0	0
02/11/2015 17:24	AMAR371.9.20151102T172431Z.wav_chan0.xml	0	0
02/11/2015 17:32	AMAR371.9.20151102T173231Z.wav_chan0.xml	0	0
02/11/2015 17:40	AMAR371.9.20151102T174031Z.wav_chan0.xml	1	0
02/11/2015 17:48	AMAR371.9.20151102T174831Z.wav_chan0.xml	0	2
02/11/2015 17:56	AMAR371.9.20151102T175631Z.wav_chan0.xml	0	0
02/11/2015 18:04	AMAR371.9.20151102T180431Z.wav_chan0.xml	0	0
02/11/2015 18:12	AMAR371.9.20151102T181231Z.wav_chan0.xml	0	0
02/11/2015 18:20	AMAR371.9.20151102T182031Z.wav_chan0.xml	0	0
02/11/2015 18:28	AMAR371.9.20151102T182831Z.wav_chan0.xml	0	0
02/11/2015 18:36	AMAR371.9.20151102T183631Z.wav_chan0.xml	0	0
02/11/2015 18:44	AMAR371.9.20151102T184431Z.wav_chan0.xml	0	0
02/11/2015 18:52	AMAR371.9.20151102T185231Z.wav_chan0.xml	0	0
02/11/2015 19:00	AMAR371.9.20151102T190031Z.wav_chan0.xml	0	0
02/11/2015 19:08	AMAR371.9.20151102T190831Z.wav_chan0.xml	0	0
02/11/2015 19:16	AMAR371.9.20151102T191631Z.wav_chan0.xml	0	0
02/11/2015 19:24	AMAR371.9.20151102T192431Z.wav_chan0.xml	0	0
02/11/2015 19:32	AMAR371.9.20151102T193231Z.wav_chan0.xml	0	0
02/11/2015 19:40	AMAR371.9.20151102T194031Z.wav_chan0.xml	0	0
02/11/2015 19:48	AMAR371.9.20151102T194831Z.wav_chan0.xml	0	0
02/11/2015 19:56	AMAR371.9.20151102T195631Z.wav_chan0.xml	0	0
02/11/2015 20:04	AMAR371.9.20151102T200431Z.wav_chan0.xml	0	0
02/11/2015 20:12	AMAR371.9.20151102T201231Z.wav_chan0.xml	0	0
02/11/2015 20:20	AMAR371.9.20151102T202031Z.wav_chan0.xml	0	0
02/11/2015 20:28	AMAR371.9.20151102T202831Z.wav_chan0.xml	0	0
02/11/2015 20:36	AMAR371.9.20151102T203631Z.wav_chan0.xml	0	0
02/11/2015 20:44	AMAR371.9.20151102T204431Z.wav_chan0.xml	0	0
02/11/2015 20:52	AMAR371.9.20151102T205231Z.wav_chan0.xml	0	0
02/11/2015 21:00	AMAR371.9.20151102T210031Z.wav_chan0.xml	0	0
02/11/2015 21:08	AMAR371.9.20151102T210831Z.wav_chan0.xml	0	0
02/11/2015 21:16	AMAR371.9.20151102T211631Z.wav_chan0.xml	0	0
02/11/2015 21:24	AMAR371.9.20151102T212431Z.wav_chan0.xml	0	0
02/11/2015 21:32	AMAR371.9.20151102T213231Z.wav_chan0.xml	0	0
02/11/2015 21:40	AMAR371.9.20151102T214031Z.wav_chan0.xml	0	0
02/11/2015 21:48	AMAR371.9.20151102T214831Z.wav_chan0.xml	0	0
02/11/2015 21:56	AMAR371.9.20151102T215631Z.wav_chan0.xml	0	0
02/11/2015 22:04	AMAR371.9.20151102T220431Z.wav_chan0.xml	0	0
02/11/2015 22:12	AMAR371.9.20151102T221231Z.wav_chan0.xml	0	0
02/11/2015 22:20	AMAR371.9.20151102T222031Z.wav_chan0.xml	0	0
02/11/2015 22:28	AMAR371.9.20151102T222831Z.wav_chan0.xml	0	0
02/11/2015 22:36	AMAR371.9.20151102T223631Z.wav_chan0.xml	0	0
02/11/2015 22:44	AMAR371.9.20151102T224431Z.wav_chan0.xml	0	0
02/11/2015 22:52	AMAR371.9.20151102T225231Z.wav_chan0.xml	0	0
02/11/2015 23:00	AMAR371.9.20151102T230031Z.wav_chan0.xml	0	0
02/11/2015 23:08	AMAR371.9.20151102T230831Z.wav_chan0.xml	0	0
02/11/2015 23:16	AMAR371.9.20151102T231631Z.wav_chan0.xml	0	0
02/11/2015 23:24	AMAR371.9.20151102T232431Z.wav_chan0.xml	0	0
02/11/2015 23:32	AMAR371.9.20151102T233231Z.wav_chan0.xml	0	0
02/11/2015 23:40	AMAR371.9.20151102T234031Z.wav_chan0.xml	0	0
02/11/2015 23:48	AMAR371.9.20151102T234831Z.wav_chan0.xml	0	0
02/11/2015 23:56	AMAR371.9.20151102T235631Z.wav_chan0.xml	0	0
02/10/2015 0:04	AMAR371.9.20151002T000431Z.wav_chan0.xml	0	0
02/10/2015 0:12	AMAR371.9.20151002T001231Z.wav_chan0.xml	0	0
02/10/2015 0:20	AMAR371.9.20151002T002031Z.wav_chan0.xml	0	0
02/10/2015 0:28	AMAR371.9.20151002T002831Z.wav_chan0.xml	0	0
02/10/2015 0:36	AMAR371.9.20151002T003631Z.wav_chan0.xml	0	0
02/10/2015 0:44	AMAR371.9.20151002T004431Z.wav_chan0.xml	0	0
02/10/2015 0:52	AMAR371.9.20151002T005231Z.wav_chan0.xml	0	0
02/10/2015 1:00	AMAR371.9.20151002T010031Z.wav_chan0.xml	0	2
02/10/2015 1:08	AMAR371.9.20151002T010831Z.wav_chan0.xml	0	1
02/10/2015 1:16	AMAR371.9.20151002T011631Z.wav_chan0.xml	0	0
02/10/2015 1:24	AMAR371.9.20151002T012431Z.wav_chan0.xml	0	0
02/10/2015 1:32	AMAR371.9.20151002T013231Z.wav_chan0.xml	0	0
02/10/2015 1:40	AMAR371.9.20151002T014031Z.wav_chan0.xml	0	0
02/10/2015 1:48	AMAR371.9.20151002T014831Z.wav_chan0.xml	0	0
02/10/2015 1:56	AMAR371.9.20151002T015631Z.wav_chan0.xml	0	0
02/10/2015 2:04	AMAR371.9.20151002T020431Z.wav_chan0.xml	0	0
02/10/2015 2:12	AMAR371.9.20151002T021231Z.wav_chan0.xml	0	0
02/10/2015 2:20	AMAR371.9.20151002T022031Z.wav_chan0.xml	0	0
02/10/2015 2:28	AMAR371.9.20151002T022831Z.wav_chan0.xml	0	0
02/10/2015 2:36	AMAR371.9.20151002T023631Z.wav_chan0.xml	0	0
02/10/2015 2:44	AMAR371.9.20151002T024431Z.wav_chan0.xml	0	0
02/10/2015 2:52	AMAR371.9.20151002T025231Z.wav_chan0.xml	0	0
02/10/2015 3:00	AMAR371.9.20151002T030031Z.wav_chan0.xml	0	0
02/10/2015 3:08	AMAR371.9.20151002T030831Z.wav_chan0.xml	0	0
02/10/2015 3:16	AMAR371.9.20151002T031631Z.wav_chan0.xml	0	0
02/10/2015 3:24	AMAR371.9.20151002T032431Z.wav_chan0.xml	0	0
02/10/2015 3:32	AMAR371.9.20151002T033231Z.wav_chan0.xml	0	0
02/10/2015 3:40	AMAR371.9.20151002T034031Z.wav_chan0.xml	0	0
02/10/2015 3:48	AMAR371.9.20151002T034831Z.wav_chan0.xml	0	0
02/10/2015 3:56	AMAR371.9.20151002T035631Z.wav_chan0.xml	0	0
02/10/2015 4:04	AMAR371.9.20151002T040431Z.wav_chan0.xml	0	0
02/10/2015 4:12	AMAR371.9.20151002T041231Z.wav_chan0.xml	0	0
02/10/2015 4:20	AMAR371.9.20151002T042031Z.wav_chan0.xml	0	0
02/10/2015 4:28	AMAR371.9.20151002T042831Z.wav_chan0.xml	0	0
02/10/2015 4:36	AMAR371.9.20151002T043631Z.wav_chan0.xml	0	0
02/10/2015 4:44	AMAR371.9.20151002T044431Z.wav_chan0.xml	0	0
02/10/2015 4:52	AMAR371.9.20151002T045231Z.wav_chan0.xml	0	0
02/10/2015 5:00	AMAR371.9.20151002T050031Z.wav_chan0.xml	0	0
02/10/2015 5:08	AMAR371.9.20151002T050831Z.wav_chan0.xml	0	0
02/10/2015 5:16	AMAR371.9.20151002T051631Z.wav_chan0.xml	0	0
02/10/2015 5:24	AMAR371.9.20151002T052431Z.wav_chan0.xml	0	0
02/10/2015 5:32	AMAR371.9.20151002T053231Z.wav_chan0.xml	0	1
02/10/2015 5:40	AMAR371.9.20151002T054031Z.wav_chan0.xml	0	0
02/10/2015 5:48	AMAR371.9.20151002T054831Z.wav_chan0.xml	0	0
02/10/2015 5:56	AMAR371.9.20151002T055631Z.wav_chan0.xml	0	0
02/10/2015 6:04	AMAR371.9.20151002T060431Z.wav_chan0.xml	0	0
02/10/2015 6:12	AMAR371.9.20151002T061231Z.wav_chan0.xml	0	0
02/10/2015 6:20	AMAR371.9.20151002T062031Z.wav_chan0.xml	0	0
02/10/2015 6:28	AMAR371.9.20151002T062831Z.wav_chan0.xml	0	0
02/10/2015 6:36	AMAR371.9.20151002T063631Z.wav_chan0.xml	0	0
02/10/2015 6:44	AMAR371.9.20151002T064431Z.wav_chan0.xml	0	0
02/10/2015 6:52	AMAR371.9.20151002T065231Z.wav_chan0.xml	0	0
02/10/2015 7:00	AMAR371.9.20151002T070031Z.wav_chan0.xml	0	0
02/10/2015 7:08	AMAR371.9.20151002T070831Z.wav_chan0.xml	0	0
02/10/2015 7:16	AMAR371.9.20151002T071631Z.wav_chan0.xml	4	0
02/10/2015 7:24	AMAR371.9.20151002T072431Z.wav_chan0.xml	0	0
02/10/2015 7:32	AMAR371.9.20151002T073231Z.wav_chan0.xml	0	0
02/10/2015 7:40	AMAR371.9.20151002T074031Z.wav_chan0.xml	0	0
02/10/2015 7:48	AMAR371.9.20151002T074831Z.wav_chan0.xml	0	0
02/10/2015 7:56	AMAR371.9.20151002T075631Z.wav_chan0.xml	0	0
02/10/2015 8:04	AMAR371.9.20151002T080431Z.wav_chan0.xml	0	0
02/10/2015 8:12	AMAR371.9.20151002T081231Z.wav_chan0.xml	0	0
02/10/2015 8:20	AMAR371.9.20151002T082031Z.wav_chan0.xml	0	0
02/10/2015 8:28	AMAR371.9.20151002T082831Z.wav_chan0.xml	0	0
02/10/2015 8:36	AMAR371.9.20151002T083631Z.wav_chan0.xml	0	0
02/10/2015 8:44	AMAR371.9.20151002T084431Z.wav_chan0.xml	0	0
02/10/2015 8:52	AMAR371.9.20151002T085231Z.wav_chan0.xml	0	0
02/10/2015 9:00	AMAR371.9.20151002T090031Z.wav_chan0.xml	0	0
02/10/2015 9:08	AMAR371.9.20151002T090831Z.wav_chan0.xml	0	0
02/10/2015 9:16	AMAR371.9.20151002T091631Z.wav_chan0.xml	0	0
02/10/2015 9:24	AMAR371.9.20151002T092431Z.wav_chan0.xml	0	0
02/10/2015 9:32	AMAR371.9.20151002T093231Z.wav_chan0.xml	0	0
02/10/2015 9:40	AMAR371.9.20151002T094031Z.wav_chan0.xml	0	0
02/10/2015 9:48	AMAR371.9.20151002T094831Z.wav_chan0.xml	0	0
02/10/2015 9:56	AMAR371.9.20151002T095631Z.wav_chan0.xml	0	0
02/10/2015 10:04	AMAR371.9.20151002T100431Z.wav_chan0.xml	0	0
02/10/2015 10:12	AMAR371.9.20151002T101231Z.wav_chan0.xml	0	0
02/10/2015 10:20	AMAR371.9.20151002T102031Z.wav_chan0.xml	0	0
02/10/2015 10:28	AMAR371.9.20151002T102831Z.wav_chan0.xml	0	0
02/10/2015 10:36	AMAR371.9.20151002T103631Z.wav_chan0.xml	0	0
02/10/2015 10:44	AMAR371.9.20151002T104431Z.wav_chan0.xml	0	0
02/10/2015 10:52	AMAR371.9.20151002T105231Z.wav_chan0.xml	0	0
02/10/2015 11:00	AMAR371.9.20151002T110031Z.wav_chan0.xml	0	0
02/10/2015 11:08	AMAR371.9.20151002T110831Z.wav_chan0.xml	0	0
02/10/2015 11:16	AMAR371.9.20151002T111631Z.wav_chan0.xml	0	0
02/10/2015 11:24	AMAR371.9.20151002T112431Z.wav_chan0.xml	0	0
02/10/2015 11:32	AMAR371.9.20151002T113231Z.wav_chan0.xml	0	0
02/10/2015 11:40	AMAR371.9.20151002T114031Z.wav_chan0.xml	0	0
02/10/2015 11:48	AMAR371.9.20151002T114831Z.wav_chan0.xml	0	0
02/10/2015 11:56	AMAR371.9.20151002T115631Z.wav_chan0.xml	0	0
02/10/2015 12:04	AMAR371.9.20151002T120431Z.wav_chan0.xml	0	0
02/10/2015 12:12	AMAR371.9.20151002T121231Z.wav_chan0.xml	0	0
02/10/2015 12:20	AMAR371.9.20151002T122031Z.wav_chan0.xml	0	0
02/10/2015 12:28	AMAR371.9.20151002T122831Z.wav_chan0.xml	0	0
02/10/2015 12:36	AMAR371.9.20151002T123631Z.wav_chan0.xml	0	0
02/10/2015 12:44	AMAR371.9.20151002T124431Z.wav_chan0.xml	0	0
02/10/2015 12:52	AMAR371.9.20151002T125231Z.wav_chan0.xml	0	0
02/10/2015 13:00	AMAR371.9.20151002T130031Z.wav_chan0.xml	0	0
02/10/2015 13:08	AMAR371.9.20151002T130831Z.wav_chan0.xml	0	0
02/10/2015 13:16	AMAR371.9.20151002T131631Z.wav_chan0.xml	0	0
02/10/2015 13:24	AMAR371.9.20151002T132431Z.wav_chan0.xml	0	0
02/10/2015 13:32	AMAR371.9.20151002T133231Z.wav_chan0.xml	0	0
02/10/2015 13:40	AMAR371.9.20151002T134031Z.wav_chan0.xml	0	0
02/10/2015 13:48	AMAR371.9.20151002T134831Z.wav_chan0.xml	0	0
02/10/2015 13:56	AMAR371.9.20151002T135631Z.wav_chan0.xml	0	0
02/10/2015 14:04	AMAR371.9.20151002T140431Z.wav_chan0.xml	0	0
02/10/2015 14:12	AMAR371.9.20151002T141231Z.wav_chan0.xml	0	0
02/10/2015 14:20	AMAR371.9.20151002T142031Z.wav_chan0.xml	0	0
02/10/2015 14:28	AMAR371.9.20151002T142831Z.wav_chan0.xml	0	0
02/10/2015 14:36	AMAR371.9.20151002T143631Z.wav_chan0.xml	0	0
02/10/2015 14:44	AMAR371.9.20151002T144431Z.wav_chan0.xml	0	0
02/10/2015 14:52	AMAR371.9.20151002T145231Z.wav_chan0.xml	0	0
02/10/2015 15:00	AMAR371.9.20151002T150031Z.wav_chan0.xml	0	0
02/10/2015 15:08	AMAR371.9.20151002T150831Z.wav_chan0.xml	0	0
02/10/2015 15:16	AMAR371.9.20151002T151631Z.wav_chan0.xml	0	0
02/10/2015 15:24	AMAR371.9.20151002T152431Z.wav_chan0.xml	0	0
02/10/2015 15:32	AMAR371.9.20151002T153231Z.wav_chan0.xml	0	0
02/10/2015 15:40	AMAR371.9.20151002T154031Z.wav_chan0.xml	0	0
02/10/2015 15:48	AMAR371.9.20151002T154831Z.wav_chan0.xml	0	0
02/10/2015 15:56	AMAR371.9.20151002T155631Z.wav_chan0.xml	0	0
02/10/2015 16:04	AMAR371.9.20151002T160431Z.wav_chan0.xml	1	0
02/10/2015 16:12	AMAR371.9.20151002T161231Z.wav_chan0.xml	0	0
02/10/2015 16:20	AMAR371.9.20151002T162031Z.wav_chan0.xml	0	0
02/10/2015 16:28	AMAR371.9.20151002T162831Z.wav_chan0.xml	0	0
02/10/2015 16:36	AMAR371.9.20151002T163631Z.wav_chan0.xml	0	0
02/10/2015 16:44	AMAR371.9.20151002T164431Z.wav_chan0.xml	0	0
02/10/2015 16:52	AMAR371.9.20151002T165231Z.wav_chan0.xml	0	0
02/10/2015 17:00	AMAR371.9.20151002T170031Z.wav_chan0.xml	0	0
02/10/2015 17:08	AMAR371.9.20151002T170831Z.wav_chan0.xml	0	0
02/10/2015 17:16	AMAR371.9.20151002T171631Z.wav_chan0.xml	0	0
02/10/2015 17:24	AMAR371.9.20151002T172431Z.wav_chan0.xml	0	0
02/10/2015 17:32	AMAR371.9.20151002T173231Z.wav_chan0.xml	0	0
02/10/2015 17:40	AMAR371.9.20151002T174031Z.wav_chan0.xml	0	0
02/10/2015 17:48	AMAR371.9.20151002T174831Z.wav_chan0.xml	0	0
02/10/2015 17:56	AMAR371.9.20151002T175631Z.wav_chan0.xml	0	0
02/10/2015 18:04	AMAR371.9.20151002T180431Z.wav_chan0.xml	0	0
02/10/2015 18:12	AMAR371.9.20151002T181231Z.wav_chan0.xml	0	1
02/10/2015 18:20	AMAR371.9.20151002T182031Z.wav_chan0.xml	0	0
02/10/2015 18:28	AMAR371.9.20151002T182831Z.wav_chan0.xml	0	1
02/10/2015 18:36	AMAR371.9.20151002T183631Z.wav_chan0.xml	0	0
02/10/2015 18:44	AMAR371.9.20151002T184431Z.wav_chan0.xml	0	2
02/10/2015 18:52	AMAR371.9.20151002T185231Z.wav_chan0.xml	0	0
02/10/2015 19:00	AMAR371.9.20151002T190031Z.wav_chan0.xml	0	0
02/10/2015 19:08	AMAR371.9.20151002T190831Z.wav_chan0.xml	0	0
02/10/2015 19:16	AMAR371.9.20151002T191631Z.wav_chan0.xml	0	0
02/10/2015 19:24	AMAR371.9.20151002T192431Z.wav_chan0.xml	0	0
02/10/2015 19:32	AMAR371.9.20151002T193231Z.wav_chan0.xml	0	0
02/10/2015 19:40	AMAR371.9.20151002T194031Z.wav_chan0.xml	0	0
02/10/2015 19:48	AMAR371.9.20151002T194831Z.wav_chan0.xml	0	0
02/10/2015 19:56	AMAR371.9.20151002T195631Z.wav_chan0.xml	0	0
02/10/2015 20:04	AMAR371.9.20151002T200431Z.wav_chan0.xml	11	0
02/10/2015 20:12	AMAR371.9.20151002T201231Z.wav_chan0.xml	0	0
02/10/2015 20:20	AMAR371.9.20151002T202031Z.wav_chan0.xml	0	0
02/10/2015 20:28	AMAR371.9.20151002T202831Z.wav_chan0.xml	0	0
02/10/2015 20:36	AMAR371.9.20151002T203631Z.wav_chan0.xml	0	0
02/10/2015 20:44	AMAR371.9.20151002T204431Z.wav_chan0.xml	0	0
02/10/2015 20:52	AMAR371.9.20151002T205231Z.wav_chan0.xml	0	0
02/10/2015 21:00	AMAR371.9.20151002T210031Z.wav_chan0.xml	0	0
02/10/2015 21:08	AMAR371.9.20151002T210831Z.wav_chan0.xml	0	0
02/10/2015 21:16	AMAR371.9.20151002T211631Z.wav_chan0.xml	0	0
02/10/2015 21:24	AMAR371.9.20151002T212431Z.wav_chan0.xml	0	0
02/10/2015 21:32	AMAR371.9.20151002T213231Z.wav_chan0.xml	0	0
02/10/2015 21:40	AMAR371.9.20151002T214031Z.wav_chan0.xml	0	0
02/10/2015 21:48	AMAR371.9.20151002T214831Z.wav_chan0.xml	0	0
02/10/2015 21:56	AMAR371.9.20151002T215631Z.wav_chan0.xml	0	0
02/10/2015 22:04	AMAR371.9.20151002T220431Z.wav_chan0.xml	0	0
02/10/2015 22:12	AMAR371.9.20151002T221231Z.wav_chan0.xml	0	0
02/10/2015 22:20	AMAR371.9.20151002T222031Z.wav_chan0.xml	0	0
02/10/2015 22:28	AMAR371.9.20151002T222831Z.wav_chan0.xml	0	0
02/10/2015 22:36	AMAR371.9.20151002T223631Z.wav_chan0.xml	0	0
02/10/2015 22:44	AMAR371.9.20151002T224431Z.wav_chan0.xml	0	0
02/10/2015 22:52	AMAR371.9.20151002T225231Z.wav_chan0.xml	0	0
02/10/2015 23:00	AMAR371.9.20151002T230031Z.wav_chan0.xml	0	0
02/10/2015 23:08	AMAR371.9.20151002T230831Z.wav_chan0.xml	0	0
02/10/2015 23:16	AMAR371.9.20151002T231631Z.wav_chan0.xml	0	0
02/10/2015 23:24	AMAR371.9.20151002T232431Z.wav_chan0.xml	0	0
02/10/2015 23:32	AMAR371.9.20151002T233231Z.wav_chan0.xml	0	0
02/10/2015 23:40	AMAR371.9.20151002T234031Z.wav_chan0.xml	0	0
02/10/2015 23:48	AMAR371.9.20151002T234831Z.wav_chan0.xml	0	0
02/10/2015 23:56	AMAR371.9.20151002T235631Z.wav_chan0.xml	0	0
02/09/2015 0:04	AMAR371.9.20150902T000431Z.wav_chan0.xml	0	0
02/09/2015 0:12	AMAR371.9.20150902T001231Z.wav_chan0.xml	0	0
02/09/2015 0:20	AMAR371.9.20150902T002031Z.wav_chan0.xml	0	0
02/09/2015 0:28	AMAR371.9.20150902T002831Z.wav_chan0.xml	0	0
02/09/2015 0:36	AMAR371.9.20150902T003631Z.wav_chan0.xml	0	0
02/09/2015 0:44	AMAR371.9.20150902T004431Z.wav_chan0.xml	0	0
02/09/2015 0:52	AMAR371.9.20150902T005231Z.wav_chan0.xml	0	0
02/09/2015 1:00	AMAR371.9.20150902T010031Z.wav_chan0.xml	0	0
02/09/2015 1:08	AMAR371.9.20150902T010831Z.wav_chan0.xml	0	0
02/09/2015 1:16	AMAR371.9.20150902T011631Z.wav_chan0.xml	0	0
02/09/2015 1:24	AMAR371.9.20150902T012431Z.wav_chan0.xml	1	0
02/09/2015 1:32	AMAR371.9.20150902T013231Z.wav_chan0.xml	11	0
02/09/2015 1:40	AMAR371.9.20150902T014031Z.wav_chan0.xml	0	0
02/09/2015 1:48	AMAR371.9.20150902T014831Z.wav_chan0.xml	0	0
02/09/2015 1:56	AMAR371.9.20150902T015631Z.wav_chan0.xml	0	0
02/09/2015 2:04	AMAR371.9.20150902T020431Z.wav_chan0.xml	0	0
02/09/2015 2:12	AMAR371.9.20150902T021231Z.wav_chan0.xml	0	0
02/09/2015 2:20	AMAR371.9.20150902T022031Z.wav_chan0.xml	0	0
02/09/2015 2:28	AMAR371.9.20150902T022831Z.wav_chan0.xml	0	0
02/09/2015 2:36	AMAR371.9.20150902T023631Z.wav_chan0.xml	0	0
02/09/2015 2:44	AMAR371.9.20150902T024431Z.wav_chan0.xml	0	0
02/09/2015 2:52	AMAR371.9.20150902T025231Z.wav_chan0.xml	0	0
02/09/2015 3:00	AMAR371.9.20150902T030031Z.wav_chan0.xml	0	0
02/09/2015 3:08	AMAR371.9.20150902T030831Z.wav_chan0.xml	0	0
02/09/2015 3:16	AMAR371.9.20150902T031631Z.wav_chan0.xml	0	0
02/09/2015 3:24	AMAR371.9.20150902T032431Z.wav_chan0.xml	0	0
02/09/2015 3:32	AMAR371.9.20150902T033231Z.wav_chan0.xml	0	0
02/09/2015 3:40	AMAR371.9.20150902T034031Z.wav_chan0.xml	0	0
02/09/2015 3:48	AMAR371.9.20150902T034831Z.wav_chan0.xml	0	0
02/09/2015 3:56	AMAR371.9.20150902T035631Z.wav_chan0.xml	0	0
02/09/2015 4:04	AMAR371.9.20150902T040431Z.wav_chan0.xml	0	0
02/09/2015 4:12	AMAR371.9.20150902T041231Z.wav_chan0.xml	0	0
02/09/2015 4:20	AMAR371.9.20150902T042031Z.wav_chan0.xml	0	0
02/09/2015 4:28	AMAR371.9.20150902T042831Z.wav_chan0.xml	0	0
02/09/2015 4:36	AMAR371.9.20150902T043631Z.wav_chan0.xml	0	0
02/09/2015 4:44	AMAR371.9.20150902T044431Z.wav_chan0.xml	0	0
02/09/2015 4:52	AMAR371.9.20150902T045231Z.wav_chan0.xml	0	0
02/09/2015 5:00	AMAR371.9.20150902T050031Z.wav_chan0.xml	0	0
02/09/2015 5:08	AMAR371.9.20150902T050831Z.wav_chan0.xml	0	0
02/09/2015 5:16	AMAR371.9.20150902T051631Z.wav_chan0.xml	0	0
02/09/2015 5:24	AMAR371.9.20150902T052431Z.wav_chan0.xml	0	0
02/09/2015 5:32	AMAR371.9.20150902T053231Z.wav_chan0.xml	0	0
02/09/2015 5:40	AMAR371.9.20150902T054031Z.wav_chan0.xml	0	0
02/09/2015 5:48	AMAR371.9.20150902T054831Z.wav_chan0.xml	0	0
02/09/2015 5:56	AMAR371.9.20150902T055631Z.wav_chan0.xml	0	0
02/09/2015 6:04	AMAR371.9.20150902T060431Z.wav_chan0.xml	0	0
02/09/2015 6:12	AMAR371.9.20150902T061231Z.wav_chan0.xml	0	0
02/09/2015 6:20	AMAR371.9.20150902T062031Z.wav_chan0.xml	0	0
02/09/2015 6:28	AMAR371.9.20150902T062831Z.wav_chan0.xml	0	0
02/09/2015 6:36	AMAR371.9.20150902T063631Z.wav_chan0.xml	0	0
02/09/2015 6:44	AMAR371.9.20150902T064431Z.wav_chan0.xml	0	0
02/09/2015 6:52	AMAR371.9.20150902T065231Z.wav_chan0.xml	0	0
02/09/2015 7:00	AMAR371.9.20150902T070031Z.wav_chan0.xml	0	0
02/09/2015 7:08	AMAR371.9.20150902T070831Z.wav_chan0.xml	0	0
02/09/2015 7:16	AMAR371.9.20150902T071631Z.wav_chan0.xml	0	1
02/09/2015 7:24	AMAR371.9.20150902T072431Z.wav_chan0.xml	0	0
02/09/2015 7:32	AMAR371.9.20150902T073231Z.wav_chan0.xml	0	0
02/09/2015 7:40	AMAR371.9.20150902T074031Z.wav_chan0.xml	0	0
02/09/2015 7:48	AMAR371.9.20150902T074831Z.wav_chan0.xml	0	0
02/09/2015 7:56	AMAR371.9.20150902T075631Z.wav_chan0.xml	0	0
02/09/2015 8:04	AMAR371.9.20150902T080431Z.wav_chan0.xml	0	0
02/09/2015 8:12	AMAR371.9.20150902T081231Z.wav_chan0.xml	0	0
02/09/2015 8:20	AMAR371.9.20150902T082031Z.wav_chan0.xml	0	0
02/09/2015 8:28	AMAR371.9.20150902T082831Z.wav_chan0.xml	0	0
02/09/2015 8:36	AMAR371.9.20150902T083631Z.wav_chan0.xml	0	0
02/09/2015 8:44	AMAR371.9.20150902T084431Z.wav_chan0.xml	0	0
02/09/2015 8:52	AMAR371.9.20150902T085231Z.wav_chan0.xml	0	0
02/09/2015 9:00	AMAR371.9.20150902T090031Z.wav_chan0.xml	0	0
02/09/2015 9:08	AMAR371.9.20150902T090831Z.wav_chan0.xml	0	0
02/09/2015 9:16	AMAR371.9.20150902T091631Z.wav_chan0.xml	0	0
02/09/2015 9:24	AMAR371.9.20150902T092431Z.wav_chan0.xml	0	0
02/09/2015 9:32	AMAR371.9.20150902T093231Z.wav_chan0.xml	0	0
02/09/2015 9:40	AMAR371.9.20150902T094031Z.wav_chan0.xml	0	0
02/09/2015 9:48	AMAR371.9.20150902T094831Z.wav_chan0.xml	0	0
02/09/2015 9:56	AMAR371.9.20150902T095631Z.wav_chan0.xml	0	0
02/09/2015 10:04	AMAR371.9.20150902T100431Z.wav_chan0.xml	0	0
02/09/2015 10:12	AMAR371.9.20150902T101231Z.wav_chan0.xml	0	0
02/09/2015 10:20	AMAR371.9.20150902T102031Z.wav_chan0.xml	0	0
02/09/2015 10:28	AMAR371.9.20150902T102831Z.wav_chan0.xml	0	0
02/09/2015 10:36	AMAR371.9.20150902T103631Z.wav_chan0.xml	0	0
02/09/2015 10:44	AMAR371.9.20150902T104431Z.wav_chan0.xml	0	0
02/09/2015 10:52	AMAR371.9.20150902T105231Z.wav_chan0.xml	0	0
02/09/2015 11:00	AMAR371.9.20150902T110031Z.wav_chan0.xml	0	0
02/09/2015 11:08	AMAR371.9.20150902T110831Z.wav_chan0.xml	0	0
02/09/2015 11:16	AMAR371.9.20150902T111631Z.wav_chan0.xml	0	0
02/09/2015 11:24	AMAR371.9.20150902T112431Z.wav_chan0.xml	0	0
02/09/2015 11:32	AMAR371.9.20150902T113231Z.wav_chan0.xml	0	0
02/09/2015 11:40	AMAR371.9.20150902T114031Z.wav_chan0.xml	0	0
02/09/2015 11:48	AMAR371.9.20150902T114831Z.wav_chan0.xml	0	0
02/09/2015 11:56	AMAR371.9.20150902T115631Z.wav_chan0.xml	0	0
02/09/2015 12:04	AMAR371.9.20150902T120431Z.wav_chan0.xml	0	0
02/09/2015 12:12	AMAR371.9.20150902T121231Z.wav_chan0.xml	0	0
02/09/2015 12:20	AMAR371.9.20150902T122031Z.wav_chan0.xml	0	0
02/09/2015 12:28	AMAR371.9.20150902T122831Z.wav_chan0.xml	14	0
02/09/2015 12:36	AMAR371.9.20150902T123631Z.wav_chan0.xml	14	0
02/09/2015 12:44	AMAR371.9.20150902T124431Z.wav_chan0.xml	0	0
02/09/2015 12:52	AMAR371.9.20150902T125231Z.wav_chan0.xml	0	0
02/09/2015 13:00	AMAR371.9.20150902T130031Z.wav_chan0.xml	0	0
02/09/2015 13:08	AMAR371.9.20150902T130831Z.wav_chan0.xml	0	0
02/09/2015 13:16	AMAR371.9.20150902T131631Z.wav_chan0.xml	0	0
02/09/2015 13:24	AMAR371.9.20150902T132431Z.wav_chan0.xml	0	0
02/09/2015 13:32	AMAR371.9.20150902T133231Z.wav_chan0.xml	0	0
02/09/2015 13:40	AMAR371.9.20150902T134031Z.wav_chan0.xml	0	0
02/09/2015 13:48	AMAR371.9.20150902T134831Z.wav_chan0.xml	0	0
02/09/2015 13:56	AMAR371.9.20150902T135631Z.wav_chan0.xml	0	0
02/09/2015 14:04	AMAR371.9.20150902T140431Z.wav_chan0.xml	0	0
02/09/2015 14:12	AMAR371.9.20150902T141231Z.wav_chan0.xml	0	0
02/09/2015 14:20	AMAR371.9.20150902T142031Z.wav_chan0.xml	0	0
02/09/2015 14:28	AMAR371.9.20150902T142831Z.wav_chan0.xml	0	0
02/09/2015 14:36	AMAR371.9.20150902T143631Z.wav_chan0.xml	0	0
02/09/2015 14:44	AMAR371.9.20150902T144431Z.wav_chan0.xml	0	0
02/09/2015 14:52	AMAR371.9.20150902T145231Z.wav_chan0.xml	0	0
02/09/2015 15:00	AMAR371.9.20150902T150031Z.wav_chan0.xml	0	0
02/09/2015 15:08	AMAR371.9.20150902T150831Z.wav_chan0.xml	0	0
02/09/2015 15:16	AMAR371.9.20150902T151631Z.wav_chan0.xml	0	0
02/09/2015 15:24	AMAR371.9.20150902T152431Z.wav_chan0.xml	0	0
02/09/2015 15:32	AMAR371.9.20150902T153231Z.wav_chan0.xml	0	0
02/09/2015 15:40	AMAR371.9.20150902T154031Z.wav_chan0.xml	0	0
02/09/2015 15:48	AMAR371.9.20150902T154831Z.wav_chan0.xml	0	0
02/09/2015 15:56	AMAR371.9.20150902T155631Z.wav_chan0.xml	0	0
02/09/2015 16:04	AMAR371.9.20150902T160431Z.wav_chan0.xml	0	0
02/09/2015 16:12	AMAR371.9.20150902T161231Z.wav_chan0.xml	0	0
02/09/2015 16:20	AMAR371.9.20150902T162031Z.wav_chan0.xml	0	0
02/09/2015 16:28	AMAR371.9.20150902T162831Z.wav_chan0.xml	0	1
02/09/2015 16:36	AMAR371.9.20150902T163631Z.wav_chan0.xml	0	0
02/09/2015 16:44	AMAR371.9.20150902T164431Z.wav_chan0.xml	0	0
02/09/2015 16:52	AMAR371.9.20150902T165231Z.wav_chan0.xml	0	0
02/09/2015 17:00	AMAR371.9.20150902T170031Z.wav_chan0.xml	0	0
02/09/2015 17:08	AMAR371.9.20150902T170831Z.wav_chan0.xml	0	0
02/09/2015 17:16	AMAR371.9.20150902T171631Z.wav_chan0.xml	0	0
02/09/2015 17:24	AMAR371.9.20150902T172431Z.wav_chan0.xml	0	0
02/09/2015 17:32	AMAR371.9.20150902T173231Z.wav_chan0.xml	0	0
02/09/2015 17:40	AMAR371.9.20150902T174031Z.wav_chan0.xml	0	0
02/09/2015 17:48	AMAR371.9.20150902T174831Z.wav_chan0.xml	0	0
02/09/2015 17:56	AMAR371.9.20150902T175631Z.wav_chan0.xml	0	0
02/09/2015 18:04	AMAR371.9.20150902T180431Z.wav_chan0.xml	0	0
02/09/2015 18:12	AMAR371.9.20150902T181231Z.wav_chan0.xml	0	0
02/09/2015 18:20	AMAR371.9.20150902T182031Z.wav_chan0.xml	0	0
02/09/2015 18:28	AMAR371.9.20150902T182831Z.wav_chan0.xml	0	0
02/09/2015 18:36	AMAR371.9.20150902T183631Z.wav_chan0.xml	0	0
02/09/2015 18:44	AMAR371.9.20150902T184431Z.wav_chan0.xml	0	0
02/09/2015 18:52	AMAR371.9.20150902T185231Z.wav_chan0.xml	0	0
02/09/2015 19:00	AMAR371.9.20150902T190031Z.wav_chan0.xml	0	0
02/09/2015 19:08	AMAR371.9.20150902T190831Z.wav_chan0.xml	0	0
02/09/2015 19:16	AMAR371.9.20150902T191631Z.wav_chan0.xml	0	0
02/09/2015 19:24	AMAR371.9.20150902T192431Z.wav_chan0.xml	0	0
02/09/2015 19:32	AMAR371.9.20150902T193231Z.wav_chan0.xml	0	0
02/09/2015 19:40	AMAR371.9.20150902T194031Z.wav_chan0.xml	0	0
02/09/2015 19:48	AMAR371.9.20150902T194831Z.wav_chan0.xml	0	0
02/09/2015 19:56	AMAR371.9.20150902T195631Z.wav_chan0.xml	0	0
02/09/2015 20:04	AMAR371.9.20150902T200431Z.wav_chan0.xml	0	0
02/09/2015 20:12	AMAR371.9.20150902T201231Z.wav_chan0.xml	0	0
02/09/2015 20:20	AMAR371.9.20150902T202031Z.wav_chan0.xml	0	0
02/09/2015 20:28	AMAR371.9.20150902T202831Z.wav_chan0.xml	0	0
02/09/2015 20:36	AMAR371.9.20150902T203631Z.wav_chan0.xml	0	0
02/09/2015 20:44	AMAR371.9.20150902T204431Z.wav_chan0.xml	0	0
02/09/2015 20:52	AMAR371.9.20150902T205231Z.wav_chan0.xml	0	0
02/09/2015 21:00	AMAR371.9.20150902T210031Z.wav_chan0.xml	0	0
02/09/2015 21:08	AMAR371.9.20150902T210831Z.wav_chan0.xml	0	0
02/09/2015 21:16	AMAR371.9.20150902T211631Z.wav_chan0.xml	0	0
02/09/2015 21:24	AMAR371.9.20150902T212431Z.wav_chan0.xml	0	0
02/09/2015 21:32	AMAR371.9.20150902T213231Z.wav_chan0.xml	0	0
02/09/2015 21:40	AMAR371.9.20150902T214031Z.wav_chan0.xml	0	0
02/09/2015 21:48	AMAR371.9.20150902T214831Z.wav_chan0.xml	0	0
02/09/2015 21:56	AMAR371.9.20150902T215631Z.wav_chan0.xml	0	0
02/09/2015 22:04	AMAR371.9.20150902T220431Z.wav_chan0.xml	0	0
02/09/2015 22:12	AMAR371.9.20150902T221231Z.wav_chan0.xml	0	0
02/09/2015 22:20	AMAR371.9.20150902T222031Z.wav_chan0.xml	0	0
02/09/2015 22:28	AMAR371.9.20150902T222831Z.wav_chan0.xml	0	0
02/09/2015 22:36	AMAR371.9.20150902T223631Z.wav_chan0.xml	0	0
02/09/2015 22:44	AMAR371.9.20150902T224431Z.wav_chan0.xml	0	0
02/09/2015 22:52	AMAR371.9.20150902T225231Z.wav_chan0.xml	0	0
02/09/2015 23:00	AMAR371.9.20150902T230031Z.wav_chan0.xml	0	0
02/09/2015 23:08	AMAR371.9.20150902T230831Z.wav_chan0.xml	0	0
02/09/2015 23:16	AMAR371.9.20150902T231631Z.wav_chan0.xml	0	0
02/09/2015 23:24	AMAR371.9.20150902T232431Z.wav_chan0.xml	0	0
02/09/2015 23:32	AMAR371.9.20150902T233231Z.wav_chan0.xml	0	0
02/09/2015 23:40	AMAR371.9.20150902T234031Z.wav_chan0.xml	0	0
02/09/2015 23:48	AMAR371.9.20150902T234831Z.wav_chan0.xml	0	0
02/09/2015 23:56	AMAR371.9.20150902T235631Z.wav_chan0.xml	0	0
03/12/2015 0:04	AMAR371.9.20151203T000431Z.wav_chan0.xml	0	0
03/12/2015 0:12	AMAR371.9.20151203T001231Z.wav_chan0.xml	0	0
03/12/2015 0:20	AMAR371.9.20151203T002031Z.wav_chan0.xml	0	0
03/12/2015 0:28	AMAR371.9.20151203T002831Z.wav_chan0.xml	0	0
03/12/2015 0:36	AMAR371.9.20151203T003631Z.wav_chan0.xml	0	0
03/12/2015 0:44	AMAR371.9.20151203T004431Z.wav_chan0.xml	0	0
03/12/2015 0:52	AMAR371.9.20151203T005231Z.wav_chan0.xml	0	0
03/12/2015 1:00	AMAR371.9.20151203T010031Z.wav_chan0.xml	0	0
03/12/2015 1:08	AMAR371.9.20151203T010831Z.wav_chan0.xml	0	0
03/12/2015 1:16	AMAR371.9.20151203T011631Z.wav_chan0.xml	0	0
03/12/2015 1:24	AMAR371.9.20151203T012431Z.wav_chan0.xml	0	0
03/12/2015 1:32	AMAR371.9.20151203T013231Z.wav_chan0.xml	0	0
03/12/2015 1:40	AMAR371.9.20151203T014031Z.wav_chan0.xml	0	0
03/12/2015 1:48	AMAR371.9.20151203T014831Z.wav_chan0.xml	0	0
03/12/2015 1:56	AMAR371.9.20151203T015631Z.wav_chan0.xml	0	0
03/12/2015 2:04	AMAR371.9.20151203T020431Z.wav_chan0.xml	0	0
03/12/2015 2:12	AMAR371.9.20151203T021231Z.wav_chan0.xml	0	0
03/12/2015 2:20	AMAR371.9.20151203T022031Z.wav_chan0.xml	0	0
03/12/2015 2:28	AMAR371.9.20151203T022831Z.wav_chan0.xml	0	0
03/12/2015 2:36	AMAR371.9.20151203T023631Z.wav_chan0.xml	0	0
03/12/2015 2:44	AMAR371.9.20151203T024431Z.wav_chan0.xml	0	0
03/12/2015 2:52	AMAR371.9.20151203T025231Z.wav_chan0.xml	0	0
03/12/2015 3:00	AMAR371.9.20151203T030031Z.wav_chan0.xml	0	0
03/12/2015 3:08	AMAR371.9.20151203T030831Z.wav_chan0.xml	0	0
03/12/2015 3:16	AMAR371.9.20151203T031631Z.wav_chan0.xml	0	0
03/12/2015 3:24	AMAR371.9.20151203T032431Z.wav_chan0.xml	0	0
03/12/2015 3:32	AMAR371.9.20151203T033231Z.wav_chan0.xml	0	0
03/12/2015 3:40	AMAR371.9.20151203T034031Z.wav_chan0.xml	0	0
03/12/2015 3:48	AMAR371.9.20151203T034831Z.wav_chan0.xml	0	0
03/12/2015 3:56	AMAR371.9.20151203T035631Z.wav_chan0.xml	0	0
03/12/2015 4:04	AMAR371.9.20151203T040431Z.wav_chan0.xml	0	0
03/12/2015 4:12	AMAR371.9.20151203T041231Z.wav_chan0.xml	0	0
03/12/2015 4:20	AMAR371.9.20151203T042031Z.wav_chan0.xml	0	0
03/12/2015 4:28	AMAR371.9.20151203T042831Z.wav_chan0.xml	0	0
03/12/2015 4:36	AMAR371.9.20151203T043631Z.wav_chan0.xml	0	0
03/12/2015 4:44	AMAR371.9.20151203T044431Z.wav_chan0.xml	0	0
03/12/2015 4:52	AMAR371.9.20151203T045231Z.wav_chan0.xml	0	0
03/12/2015 5:00	AMAR371.9.20151203T050031Z.wav_chan0.xml	0	0
03/12/2015 5:08	AMAR371.9.20151203T050831Z.wav_chan0.xml	5	0
03/12/2015 5:16	AMAR371.9.20151203T051631Z.wav_chan0.xml	0	0
03/12/2015 5:24	AMAR371.9.20151203T052431Z.wav_chan0.xml	0	0
03/12/2015 5:32	AMAR371.9.20151203T053231Z.wav_chan0.xml	0	0
03/12/2015 5:40	AMAR371.9.20151203T054031Z.wav_chan0.xml	0	0
03/12/2015 5:48	AMAR371.9.20151203T054831Z.wav_chan0.xml	0	0
03/12/2015 5:56	AMAR371.9.20151203T055631Z.wav_chan0.xml	0	0
03/12/2015 6:04	AMAR371.9.20151203T060431Z.wav_chan0.xml	0	0
03/12/2015 6:12	AMAR371.9.20151203T061231Z.wav_chan0.xml	0	0
03/12/2015 6:20	AMAR371.9.20151203T062031Z.wav_chan0.xml	0	0
03/12/2015 6:28	AMAR371.9.20151203T062831Z.wav_chan0.xml	0	0
03/12/2015 6:36	AMAR371.9.20151203T063631Z.wav_chan0.xml	0	0
03/12/2015 6:44	AMAR371.9.20151203T064431Z.wav_chan0.xml	0	0
03/12/2015 6:52	AMAR371.9.20151203T065231Z.wav_chan0.xml	0	0
03/12/2015 7:00	AMAR371.9.20151203T070031Z.wav_chan0.xml	0	0
03/12/2015 7:08	AMAR371.9.20151203T070831Z.wav_chan0.xml	0	0
03/12/2015 7:16	AMAR371.9.20151203T071631Z.wav_chan0.xml	0	0
03/12/2015 7:24	AMAR371.9.20151203T072431Z.wav_chan0.xml	0	0
03/12/2015 7:32	AMAR371.9.20151203T073231Z.wav_chan0.xml	0	0
03/12/2015 7:40	AMAR371.9.20151203T074031Z.wav_chan0.xml	0	0
03/12/2015 7:48	AMAR371.9.20151203T074831Z.wav_chan0.xml	0	0
03/12/2015 7:56	AMAR371.9.20151203T075631Z.wav_chan0.xml	0	0
03/12/2015 8:04	AMAR371.9.20151203T080431Z.wav_chan0.xml	0	0
03/12/2015 8:12	AMAR371.9.20151203T081231Z.wav_chan0.xml	0	0
03/12/2015 8:20	AMAR371.9.20151203T082031Z.wav_chan0.xml	0	0
03/12/2015 8:28	AMAR371.9.20151203T082831Z.wav_chan0.xml	0	0
03/12/2015 8:36	AMAR371.9.20151203T083631Z.wav_chan0.xml	0	0
03/12/2015 8:44	AMAR371.9.20151203T084431Z.wav_chan0.xml	0	0
03/12/2015 8:52	AMAR371.9.20151203T085231Z.wav_chan0.xml	0	0
03/12/2015 9:00	AMAR371.9.20151203T090031Z.wav_chan0.xml	0	0
03/12/2015 9:08	AMAR371.9.20151203T090831Z.wav_chan0.xml	0	0
03/12/2015 9:16	AMAR371.9.20151203T091631Z.wav_chan0.xml	0	0
03/12/2015 9:24	AMAR371.9.20151203T092431Z.wav_chan0.xml	0	0
03/12/2015 9:32	AMAR371.9.20151203T093231Z.wav_chan0.xml	0	0
03/12/2015 9:40	AMAR371.9.20151203T094031Z.wav_chan0.xml	0	0
03/12/2015 9:48	AMAR371.9.20151203T094831Z.wav_chan0.xml	0	0
03/12/2015 9:56	AMAR371.9.20151203T095631Z.wav_chan0.xml	0	0
03/12/2015 10:04	AMAR371.9.20151203T100431Z.wav_chan0.xml	0	0
03/12/2015 10:12	AMAR371.9.20151203T101231Z.wav_chan0.xml	0	0
03/12/2015 10:20	AMAR371.9.20151203T102031Z.wav_chan0.xml	0	0
03/12/2015 10:28	AMAR371.9.20151203T102831Z.wav_chan0.xml	0	0
03/12/2015 10:36	AMAR371.9.20151203T103631Z.wav_chan0.xml	0	0
03/12/2015 10:44	AMAR371.9.20151203T104431Z.wav_chan0.xml	0	0
03/12/2015 10:52	AMAR371.9.20151203T105231Z.wav_chan0.xml	0	0
03/12/2015 11:00	AMAR371.9.20151203T110031Z.wav_chan0.xml	0	0
03/12/2015 11:08	AMAR371.9.20151203T110831Z.wav_chan0.xml	0	0
03/12/2015 11:16	AMAR371.9.20151203T111631Z.wav_chan0.xml	0	0
03/12/2015 11:24	AMAR371.9.20151203T112431Z.wav_chan0.xml	0	0
03/12/2015 11:32	AMAR371.9.20151203T113231Z.wav_chan0.xml	0	0
03/12/2015 11:40	AMAR371.9.20151203T114031Z.wav_chan0.xml	0	0
03/12/2015 11:48	AMAR371.9.20151203T114831Z.wav_chan0.xml	0	0
03/12/2015 11:56	AMAR371.9.20151203T115631Z.wav_chan0.xml	0	1
03/12/2015 12:04	AMAR371.9.20151203T120431Z.wav_chan0.xml	0	0
03/12/2015 12:12	AMAR371.9.20151203T121231Z.wav_chan0.xml	0	0
03/12/2015 12:20	AMAR371.9.20151203T122031Z.wav_chan0.xml	0	0
03/12/2015 12:28	AMAR371.9.20151203T122831Z.wav_chan0.xml	0	0
03/12/2015 12:36	AMAR371.9.20151203T123631Z.wav_chan0.xml	0	0
03/12/2015 12:44	AMAR371.9.20151203T124431Z.wav_chan0.xml	0	0
03/12/2015 12:52	AMAR371.9.20151203T125231Z.wav_chan0.xml	0	0
03/12/2015 13:00	AMAR371.9.20151203T130031Z.wav_chan0.xml	0	0
03/12/2015 13:08	AMAR371.9.20151203T130831Z.wav_chan0.xml	0	0
03/12/2015 13:16	AMAR371.9.20151203T131631Z.wav_chan0.xml	0	0
03/12/2015 13:24	AMAR371.9.20151203T132431Z.wav_chan0.xml	0	0
03/12/2015 13:32	AMAR371.9.20151203T133231Z.wav_chan0.xml	0	0
03/12/2015 13:40	AMAR371.9.20151203T134031Z.wav_chan0.xml	0	0
03/12/2015 13:48	AMAR371.9.20151203T134831Z.wav_chan0.xml	0	0
03/12/2015 13:56	AMAR371.9.20151203T135631Z.wav_chan0.xml	0	0
03/12/2015 14:04	AMAR371.9.20151203T140431Z.wav_chan0.xml	0	0
03/12/2015 14:12	AMAR371.9.20151203T141231Z.wav_chan0.xml	0	0
03/12/2015 14:20	AMAR371.9.20151203T142031Z.wav_chan0.xml	0	0
03/12/2015 14:28	AMAR371.9.20151203T142831Z.wav_chan0.xml	0	0
03/12/2015 14:36	AMAR371.9.20151203T143631Z.wav_chan0.xml	0	0
03/12/2015 14:44	AMAR371.9.20151203T144431Z.wav_chan0.xml	0	0
03/12/2015 14:52	AMAR371.9.20151203T145231Z.wav_chan0.xml	0	0
03/12/2015 15:00	AMAR371.9.20151203T150031Z.wav_chan0.xml	0	0
03/12/2015 15:08	AMAR371.9.20151203T150831Z.wav_chan0.xml	0	0
03/12/2015 15:16	AMAR371.9.20151203T151631Z.wav_chan0.xml	0	0
03/12/2015 15:24	AMAR371.9.20151203T152431Z.wav_chan0.xml	0	0
03/12/2015 15:32	AMAR371.9.20151203T153231Z.wav_chan0.xml	0	0
03/12/2015 15:40	AMAR371.9.20151203T154031Z.wav_chan0.xml	0	0
03/12/2015 15:48	AMAR371.9.20151203T154831Z.wav_chan0.xml	0	0
03/12/2015 15:56	AMAR371.9.20151203T155631Z.wav_chan0.xml	0	0
03/12/2015 16:04	AMAR371.9.20151203T160431Z.wav_chan0.xml	0	0
03/12/2015 16:12	AMAR371.9.20151203T161231Z.wav_chan0.xml	0	0
03/12/2015 16:20	AMAR371.9.20151203T162031Z.wav_chan0.xml	0	0
03/12/2015 16:28	AMAR371.9.20151203T162831Z.wav_chan0.xml	0	0
03/12/2015 16:36	AMAR371.9.20151203T163631Z.wav_chan0.xml	0	0
03/12/2015 16:44	AMAR371.9.20151203T164431Z.wav_chan0.xml	0	0
03/12/2015 16:52	AMAR371.9.20151203T165231Z.wav_chan0.xml	1	3
03/12/2015 17:00	AMAR371.9.20151203T170031Z.wav_chan0.xml	0	0
03/12/2015 17:08	AMAR371.9.20151203T170831Z.wav_chan0.xml	0	0
03/12/2015 17:16	AMAR371.9.20151203T171631Z.wav_chan0.xml	0	0
03/12/2015 17:24	AMAR371.9.20151203T172431Z.wav_chan0.xml	0	0
03/12/2015 17:32	AMAR371.9.20151203T173231Z.wav_chan0.xml	0	0
03/12/2015 17:40	AMAR371.9.20151203T174031Z.wav_chan0.xml	0	0
03/12/2015 17:48	AMAR371.9.20151203T174831Z.wav_chan0.xml	0	0
03/12/2015 17:56	AMAR371.9.20151203T175631Z.wav_chan0.xml	0	0
03/12/2015 18:04	AMAR371.9.20151203T180431Z.wav_chan0.xml	0	0
03/12/2015 18:12	AMAR371.9.20151203T181231Z.wav_chan0.xml	0	0
03/12/2015 18:20	AMAR371.9.20151203T182031Z.wav_chan0.xml	0	0
03/12/2015 18:28	AMAR371.9.20151203T182831Z.wav_chan0.xml	0	0
03/12/2015 18:36	AMAR371.9.20151203T183631Z.wav_chan0.xml	0	0
03/12/2015 18:44	AMAR371.9.20151203T184431Z.wav_chan0.xml	0	0
03/12/2015 18:52	AMAR371.9.20151203T185231Z.wav_chan0.xml	0	0
03/12/2015 19:00	AMAR371.9.20151203T190031Z.wav_chan0.xml	0	0
03/12/2015 19:08	AMAR371.9.20151203T190831Z.wav_chan0.xml	0	0
03/12/2015 19:16	AMAR371.9.20151203T191631Z.wav_chan0.xml	0	0
03/12/2015 19:24	AMAR371.9.20151203T192431Z.wav_chan0.xml	0	0
03/12/2015 19:32	AMAR371.9.20151203T193231Z.wav_chan0.xml	0	0
03/12/2015 19:40	AMAR371.9.20151203T194031Z.wav_chan0.xml	0	0
03/12/2015 19:48	AMAR371.9.20151203T194831Z.wav_chan0.xml	0	0
03/12/2015 19:56	AMAR371.9.20151203T195631Z.wav_chan0.xml	0	0
03/12/2015 20:04	AMAR371.9.20151203T200431Z.wav_chan0.xml	0	0
03/12/2015 20:12	AMAR371.9.20151203T201231Z.wav_chan0.xml	0	0
03/12/2015 20:20	AMAR371.9.20151203T202031Z.wav_chan0.xml	0	0
03/12/2015 20:28	AMAR371.9.20151203T202831Z.wav_chan0.xml	0	0
03/12/2015 20:36	AMAR371.9.20151203T203631Z.wav_chan0.xml	0	0
03/12/2015 20:44	AMAR371.9.20151203T204431Z.wav_chan0.xml	0	0
03/12/2015 20:52	AMAR371.9.20151203T205231Z.wav_chan0.xml	0	0
03/12/2015 21:00	AMAR371.9.20151203T210031Z.wav_chan0.xml	0	0
03/12/2015 21:08	AMAR371.9.20151203T210831Z.wav_chan0.xml	0	0
03/12/2015 21:16	AMAR371.9.20151203T211631Z.wav_chan0.xml	0	0
03/12/2015 21:24	AMAR371.9.20151203T212431Z.wav_chan0.xml	0	0
03/12/2015 21:32	AMAR371.9.20151203T213231Z.wav_chan0.xml	0	0
03/12/2015 21:40	AMAR371.9.20151203T214031Z.wav_chan0.xml	0	0
03/12/2015 21:48	AMAR371.9.20151203T214831Z.wav_chan0.xml	0	0
03/12/2015 21:56	AMAR371.9.20151203T215631Z.wav_chan0.xml	0	0
03/12/2015 22:04	AMAR371.9.20151203T220431Z.wav_chan0.xml	0	0
03/12/2015 22:12	AMAR371.9.20151203T221231Z.wav_chan0.xml	0	0
03/12/2015 22:20	AMAR371.9.20151203T222031Z.wav_chan0.xml	0	0
03/12/2015 22:28	AMAR371.9.20151203T222831Z.wav_chan0.xml	0	0
03/12/2015 22:36	AMAR371.9.20151203T223631Z.wav_chan0.xml	0	0
03/12/2015 22:44	AMAR371.9.20151203T224431Z.wav_chan0.xml	0	0
03/12/2015 22:52	AMAR371.9.20151203T225231Z.wav_chan0.xml	0	0
03/12/2015 23:00	AMAR371.9.20151203T230031Z.wav_chan0.xml	0	0
03/12/2015 23:08	AMAR371.9.20151203T230831Z.wav_chan0.xml	0	0
03/12/2015 23:16	AMAR371.9.20151203T231631Z.wav_chan0.xml	0	0
03/12/2015 23:24	AMAR371.9.20151203T232431Z.wav_chan0.xml	0	0
03/12/2015 23:32	AMAR371.9.20151203T233231Z.wav_chan0.xml	0	0
03/12/2015 23:40	AMAR371.9.20151203T234031Z.wav_chan0.xml	0	0
03/12/2015 23:48	AMAR371.9.20151203T234831Z.wav_chan0.xml	0	0
03/12/2015 23:56	AMAR371.9.20151203T235631Z.wav_chan0.xml	0	0
03/11/2015 0:04	AMAR371.9.20151103T000431Z.wav_chan0.xml	0	0
03/11/2015 0:12	AMAR371.9.20151103T001231Z.wav_chan0.xml	0	0
03/11/2015 0:20	AMAR371.9.20151103T002031Z.wav_chan0.xml	0	0
03/11/2015 0:28	AMAR371.9.20151103T002831Z.wav_chan0.xml	0	0
03/11/2015 0:36	AMAR371.9.20151103T003631Z.wav_chan0.xml	0	0
03/11/2015 0:44	AMAR371.9.20151103T004431Z.wav_chan0.xml	0	0
03/11/2015 0:52	AMAR371.9.20151103T005231Z.wav_chan0.xml	0	0
03/11/2015 1:00	AMAR371.9.20151103T010031Z.wav_chan0.xml	0	0
03/11/2015 1:08	AMAR371.9.20151103T010831Z.wav_chan0.xml	0	0
03/11/2015 1:16	AMAR371.9.20151103T011631Z.wav_chan0.xml	0	0
03/11/2015 1:24	AMAR371.9.20151103T012431Z.wav_chan0.xml	0	0
03/11/2015 1:32	AMAR371.9.20151103T013231Z.wav_chan0.xml	0	0
03/11/2015 1:40	AMAR371.9.20151103T014031Z.wav_chan0.xml	0	0
03/11/2015 1:48	AMAR371.9.20151103T014831Z.wav_chan0.xml	0	0
03/11/2015 1:56	AMAR371.9.20151103T015631Z.wav_chan0.xml	0	0
03/11/2015 2:04	AMAR371.9.20151103T020431Z.wav_chan0.xml	0	0
03/11/2015 2:12	AMAR371.9.20151103T021231Z.wav_chan0.xml	0	0
03/11/2015 2:20	AMAR371.9.20151103T022031Z.wav_chan0.xml	0	0
03/11/2015 2:28	AMAR371.9.20151103T022831Z.wav_chan0.xml	1	0
03/11/2015 2:36	AMAR371.9.20151103T023631Z.wav_chan0.xml	0	0
03/11/2015 2:44	AMAR371.9.20151103T024431Z.wav_chan0.xml	0	0
03/11/2015 2:52	AMAR371.9.20151103T025231Z.wav_chan0.xml	0	0
03/11/2015 3:00	AMAR371.9.20151103T030031Z.wav_chan0.xml	0	0
03/11/2015 3:08	AMAR371.9.20151103T030831Z.wav_chan0.xml	0	0
03/11/2015 3:16	AMAR371.9.20151103T031631Z.wav_chan0.xml	0	0
03/11/2015 3:24	AMAR371.9.20151103T032431Z.wav_chan0.xml	0	0
03/11/2015 3:32	AMAR371.9.20151103T033231Z.wav_chan0.xml	0	0
03/11/2015 3:40	AMAR371.9.20151103T034031Z.wav_chan0.xml	0	0
03/11/2015 3:48	AMAR371.9.20151103T034831Z.wav_chan0.xml	0	0
03/11/2015 3:56	AMAR371.9.20151103T035631Z.wav_chan0.xml	0	0
03/11/2015 4:04	AMAR371.9.20151103T040431Z.wav_chan0.xml	0	0
03/11/2015 4:12	AMAR371.9.20151103T041231Z.wav_chan0.xml	0	0
03/11/2015 4:20	AMAR371.9.20151103T042031Z.wav_chan0.xml	0	0
03/11/2015 4:28	AMAR371.9.20151103T042831Z.wav_chan0.xml	0	0
03/11/2015 4:36	AMAR371.9.20151103T043631Z.wav_chan0.xml	0	0
03/11/2015 4:44	AMAR371.9.20151103T044431Z.wav_chan0.xml	0	0
03/11/2015 4:52	AMAR371.9.20151103T045231Z.wav_chan0.xml	0	0
03/11/2015 5:00	AMAR371.9.20151103T050031Z.wav_chan0.xml	0	0
03/11/2015 5:08	AMAR371.9.20151103T050831Z.wav_chan0.xml	0	0
03/11/2015 5:16	AMAR371.9.20151103T051631Z.wav_chan0.xml	0	0
03/11/2015 5:24	AMAR371.9.20151103T052431Z.wav_chan0.xml	0	0
03/11/2015 5:32	AMAR371.9.20151103T053231Z.wav_chan0.xml	0	0
03/11/2015 5:40	AMAR371.9.20151103T054031Z.wav_chan0.xml	0	0
03/11/2015 5:48	AMAR371.9.20151103T054831Z.wav_chan0.xml	0	0
03/11/2015 5:56	AMAR371.9.20151103T055631Z.wav_chan0.xml	0	0
03/11/2015 6:04	AMAR371.9.20151103T060431Z.wav_chan0.xml	0	0
03/11/2015 6:12	AMAR371.9.20151103T061231Z.wav_chan0.xml	0	0
03/11/2015 6:20	AMAR371.9.20151103T062031Z.wav_chan0.xml	0	0
03/11/2015 6:28	AMAR371.9.20151103T062831Z.wav_chan0.xml	0	0
03/11/2015 6:36	AMAR371.9.20151103T063631Z.wav_chan0.xml	0	0
03/11/2015 6:44	AMAR371.9.20151103T064431Z.wav_chan0.xml	0	0
03/11/2015 6:52	AMAR371.9.20151103T065231Z.wav_chan0.xml	0	0
03/11/2015 7:00	AMAR371.9.20151103T070031Z.wav_chan0.xml	0	0
03/11/2015 7:08	AMAR371.9.20151103T070831Z.wav_chan0.xml	0	0
03/11/2015 7:16	AMAR371.9.20151103T071631Z.wav_chan0.xml	0	0
03/11/2015 7:24	AMAR371.9.20151103T072431Z.wav_chan0.xml	0	0
03/11/2015 7:32	AMAR371.9.20151103T073231Z.wav_chan0.xml	0	0
03/11/2015 7:40	AMAR371.9.20151103T074031Z.wav_chan0.xml	0	0
03/11/2015 7:48	AMAR371.9.20151103T074831Z.wav_chan0.xml	0	0
03/11/2015 7:56	AMAR371.9.20151103T075631Z.wav_chan0.xml	0	0
03/11/2015 8:04	AMAR371.9.20151103T080431Z.wav_chan0.xml	0	0
03/11/2015 8:12	AMAR371.9.20151103T081231Z.wav_chan0.xml	0	0
03/11/2015 8:20	AMAR371.9.20151103T082031Z.wav_chan0.xml	0	0
03/11/2015 8:28	AMAR371.9.20151103T082831Z.wav_chan0.xml	0	0
03/11/2015 8:36	AMAR371.9.20151103T083631Z.wav_chan0.xml	0	0
03/11/2015 8:44	AMAR371.9.20151103T084431Z.wav_chan0.xml	0	0
03/11/2015 8:52	AMAR371.9.20151103T085231Z.wav_chan0.xml	0	0
03/11/2015 9:00	AMAR371.9.20151103T090031Z.wav_chan0.xml	0	0
03/11/2015 9:08	AMAR371.9.20151103T090831Z.wav_chan0.xml	0	0
03/11/2015 9:16	AMAR371.9.20151103T091631Z.wav_chan0.xml	0	0
03/11/2015 9:24	AMAR371.9.20151103T092431Z.wav_chan0.xml	0	0
03/11/2015 9:32	AMAR371.9.20151103T093231Z.wav_chan0.xml	0	0
03/11/2015 9:40	AMAR371.9.20151103T094031Z.wav_chan0.xml	0	0
03/11/2015 9:48	AMAR371.9.20151103T094831Z.wav_chan0.xml	0	0
03/11/2015 9:56	AMAR371.9.20151103T095631Z.wav_chan0.xml	0	0
03/11/2015 10:04	AMAR371.9.20151103T100431Z.wav_chan0.xml	0	0
03/11/2015 10:12	AMAR371.9.20151103T101231Z.wav_chan0.xml	0	0
03/11/2015 10:20	AMAR371.9.20151103T102031Z.wav_chan0.xml	0	0
03/11/2015 10:28	AMAR371.9.20151103T102831Z.wav_chan0.xml	0	1
03/11/2015 10:36	AMAR371.9.20151103T103631Z.wav_chan0.xml	0	0
03/11/2015 10:44	AMAR371.9.20151103T104431Z.wav_chan0.xml	0	0
03/11/2015 10:52	AMAR371.9.20151103T105231Z.wav_chan0.xml	0	0
03/11/2015 11:00	AMAR371.9.20151103T110031Z.wav_chan0.xml	0	0
03/11/2015 11:08	AMAR371.9.20151103T110831Z.wav_chan0.xml	0	0
03/11/2015 11:16	AMAR371.9.20151103T111631Z.wav_chan0.xml	0	0
03/11/2015 11:24	AMAR371.9.20151103T112431Z.wav_chan0.xml	0	0
03/11/2015 11:32	AMAR371.9.20151103T113231Z.wav_chan0.xml	0	0
03/11/2015 11:40	AMAR371.9.20151103T114031Z.wav_chan0.xml	0	0
03/11/2015 11:48	AMAR371.9.20151103T114831Z.wav_chan0.xml	0	0
03/11/2015 11:56	AMAR371.9.20151103T115631Z.wav_chan0.xml	0	0
03/11/2015 12:04	AMAR371.9.20151103T120431Z.wav_chan0.xml	0	0
03/11/2015 12:12	AMAR371.9.20151103T121231Z.wav_chan0.xml	0	0
03/11/2015 12:20	AMAR371.9.20151103T122031Z.wav_chan0.xml	0	0
03/11/2015 12:28	AMAR371.9.20151103T122831Z.wav_chan0.xml	0	0
03/11/2015 12:36	AMAR371.9.20151103T123631Z.wav_chan0.xml	0	0
03/11/2015 12:44	AMAR371.9.20151103T124431Z.wav_chan0.xml	0	0
03/11/2015 12:52	AMAR371.9.20151103T125231Z.wav_chan0.xml	0	0
03/11/2015 13:00	AMAR371.9.20151103T130031Z.wav_chan0.xml	0	0
03/11/2015 13:08	AMAR371.9.20151103T130831Z.wav_chan0.xml	0	0
03/11/2015 13:16	AMAR371.9.20151103T131631Z.wav_chan0.xml	0	0
03/11/2015 13:24	AMAR371.9.20151103T132431Z.wav_chan0.xml	0	0
03/11/2015 13:32	AMAR371.9.20151103T133231Z.wav_chan0.xml	0	0
03/11/2015 13:40	AMAR371.9.20151103T134031Z.wav_chan0.xml	0	0
03/11/2015 13:48	AMAR371.9.20151103T134831Z.wav_chan0.xml	0	0
03/11/2015 13:56	AMAR371.9.20151103T135631Z.wav_chan0.xml	0	0
03/11/2015 14:04	AMAR371.9.20151103T140431Z.wav_chan0.xml	0	0
03/11/2015 14:12	AMAR371.9.20151103T141231Z.wav_chan0.xml	0	0
03/11/2015 14:20	AMAR371.9.20151103T142031Z.wav_chan0.xml	0	0
03/11/2015 14:28	AMAR371.9.20151103T142831Z.wav_chan0.xml	0	0
03/11/2015 14:36	AMAR371.9.20151103T143631Z.wav_chan0.xml	0	0
03/11/2015 14:44	AMAR371.9.20151103T144431Z.wav_chan0.xml	0	0
03/11/2015 14:52	AMAR371.9.20151103T145231Z.wav_chan0.xml	0	0
03/11/2015 15:00	AMAR371.9.20151103T150031Z.wav_chan0.xml	0	1
03/11/2015 15:08	AMAR371.9.20151103T150831Z.wav_chan0.xml	0	0
03/11/2015 15:16	AMAR371.9.20151103T151631Z.wav_chan0.xml	0	0
03/11/2015 15:24	AMAR371.9.20151103T152431Z.wav_chan0.xml	0	0
03/11/2015 15:32	AMAR371.9.20151103T153231Z.wav_chan0.xml	0	0
03/11/2015 15:40	AMAR371.9.20151103T154031Z.wav_chan0.xml	0	0
03/11/2015 15:48	AMAR371.9.20151103T154831Z.wav_chan0.xml	0	0
03/11/2015 15:56	AMAR371.9.20151103T155631Z.wav_chan0.xml	0	0
03/11/2015 16:04	AMAR371.9.20151103T160431Z.wav_chan0.xml	0	0
03/11/2015 16:12	AMAR371.9.20151103T161231Z.wav_chan0.xml	0	0
03/11/2015 16:20	AMAR371.9.20151103T162031Z.wav_chan0.xml	0	0
03/11/2015 16:28	AMAR371.9.20151103T162831Z.wav_chan0.xml	0	0
03/11/2015 16:36	AMAR371.9.20151103T163631Z.wav_chan0.xml	0	0
03/11/2015 16:44	AMAR371.9.20151103T164431Z.wav_chan0.xml	0	0
03/11/2015 16:52	AMAR371.9.20151103T165231Z.wav_chan0.xml	0	0
03/11/2015 17:00	AMAR371.9.20151103T170031Z.wav_chan0.xml	0	0
03/11/2015 17:08	AMAR371.9.20151103T170831Z.wav_chan0.xml	0	0
03/11/2015 17:16	AMAR371.9.20151103T171631Z.wav_chan0.xml	0	0
03/11/2015 17:24	AMAR371.9.20151103T172431Z.wav_chan0.xml	0	0
03/11/2015 17:32	AMAR371.9.20151103T173231Z.wav_chan0.xml	0	0
03/11/2015 17:40	AMAR371.9.20151103T174031Z.wav_chan0.xml	0	0
03/11/2015 17:48	AMAR371.9.20151103T174831Z.wav_chan0.xml	0	0
03/11/2015 17:56	AMAR371.9.20151103T175631Z.wav_chan0.xml	0	0
03/11/2015 18:04	AMAR371.9.20151103T180431Z.wav_chan0.xml	0	0
03/11/2015 18:12	AMAR371.9.20151103T181231Z.wav_chan0.xml	0	0
03/11/2015 18:20	AMAR371.9.20151103T182031Z.wav_chan0.xml	0	0
03/11/2015 18:28	AMAR371.9.20151103T182831Z.wav_chan0.xml	0	0
03/11/2015 18:36	AMAR371.9.20151103T183631Z.wav_chan0.xml	0	0
03/11/2015 18:44	AMAR371.9.20151103T184431Z.wav_chan0.xml	0	0
03/11/2015 18:52	AMAR371.9.20151103T185231Z.wav_chan0.xml	0	0
03/11/2015 19:00	AMAR371.9.20151103T190031Z.wav_chan0.xml	0	0
03/11/2015 19:08	AMAR371.9.20151103T190831Z.wav_chan0.xml	0	0
03/11/2015 19:16	AMAR371.9.20151103T191631Z.wav_chan0.xml	0	0
03/11/2015 19:24	AMAR371.9.20151103T192431Z.wav_chan0.xml	0	0
03/11/2015 19:32	AMAR371.9.20151103T193231Z.wav_chan0.xml	0	0
03/11/2015 19:40	AMAR371.9.20151103T194031Z.wav_chan0.xml	2	0
03/11/2015 19:48	AMAR371.9.20151103T194831Z.wav_chan0.xml	24	0
03/11/2015 19:56	AMAR371.9.20151103T195631Z.wav_chan0.xml	0	0
03/11/2015 20:04	AMAR371.9.20151103T200431Z.wav_chan0.xml	0	0
03/11/2015 20:12	AMAR371.9.20151103T201231Z.wav_chan0.xml	0	0
03/11/2015 20:20	AMAR371.9.20151103T202031Z.wav_chan0.xml	0	0
03/11/2015 20:28	AMAR371.9.20151103T202831Z.wav_chan0.xml	0	0
03/11/2015 20:36	AMAR371.9.20151103T203631Z.wav_chan0.xml	0	0
03/11/2015 20:44	AMAR371.9.20151103T204431Z.wav_chan0.xml	0	0
03/11/2015 20:52	AMAR371.9.20151103T205231Z.wav_chan0.xml	0	0
03/11/2015 21:00	AMAR371.9.20151103T210031Z.wav_chan0.xml	0	0
03/11/2015 21:08	AMAR371.9.20151103T210831Z.wav_chan0.xml	0	0
03/11/2015 21:16	AMAR371.9.20151103T211631Z.wav_chan0.xml	2	0
03/11/2015 21:24	AMAR371.9.20151103T212431Z.wav_chan0.xml	0	0
03/11/2015 21:32	AMAR371.9.20151103T213231Z.wav_chan0.xml	0	0
03/11/2015 21:40	AMAR371.9.20151103T214031Z.wav_chan0.xml	0	0
03/11/2015 21:48	AMAR371.9.20151103T214831Z.wav_chan0.xml	0	0
03/11/2015 21:56	AMAR371.9.20151103T215631Z.wav_chan0.xml	0	0
03/11/2015 22:04	AMAR371.9.20151103T220431Z.wav_chan0.xml	0	0
03/11/2015 22:12	AMAR371.9.20151103T221231Z.wav_chan0.xml	0	1
03/11/2015 22:20	AMAR371.9.20151103T222031Z.wav_chan0.xml	0	0
03/11/2015 22:28	AMAR371.9.20151103T222831Z.wav_chan0.xml	0	0
03/11/2015 22:36	AMAR371.9.20151103T223631Z.wav_chan0.xml	0	0
03/11/2015 22:44	AMAR371.9.20151103T224431Z.wav_chan0.xml	0	0
03/11/2015 22:52	AMAR371.9.20151103T225231Z.wav_chan0.xml	0	0
03/11/2015 23:00	AMAR371.9.20151103T230031Z.wav_chan0.xml	0	0
03/11/2015 23:08	AMAR371.9.20151103T230831Z.wav_chan0.xml	0	0
03/11/2015 23:16	AMAR371.9.20151103T231631Z.wav_chan0.xml	0	0
03/11/2015 23:24	AMAR371.9.20151103T232431Z.wav_chan0.xml	0	0
03/11/2015 23:32	AMAR371.9.20151103T233231Z.wav_chan0.xml	0	0
03/11/2015 23:40	AMAR371.9.20151103T234031Z.wav_chan0.xml	0	0
03/11/2015 23:48	AMAR371.9.20151103T234831Z.wav_chan0.xml	0	0
03/11/2015 23:56	AMAR371.9.20151103T235631Z.wav_chan0.xml	0	0
03/10/2015 0:04	AMAR371.9.20151003T000431Z.wav_chan0.xml	0	0
03/10/2015 0:12	AMAR371.9.20151003T001231Z.wav_chan0.xml	0	0
03/10/2015 0:20	AMAR371.9.20151003T002031Z.wav_chan0.xml	0	0
03/10/2015 0:28	AMAR371.9.20151003T002831Z.wav_chan0.xml	0	0
03/10/2015 0:36	AMAR371.9.20151003T003631Z.wav_chan0.xml	0	0
03/10/2015 0:44	AMAR371.9.20151003T004431Z.wav_chan0.xml	0	0
03/10/2015 0:52	AMAR371.9.20151003T005231Z.wav_chan0.xml	0	0
03/10/2015 1:00	AMAR371.9.20151003T010031Z.wav_chan0.xml	0	0
03/10/2015 1:08	AMAR371.9.20151003T010831Z.wav_chan0.xml	0	0
03/10/2015 1:16	AMAR371.9.20151003T011631Z.wav_chan0.xml	0	0
03/10/2015 1:24	AMAR371.9.20151003T012431Z.wav_chan0.xml	0	0
03/10/2015 1:32	AMAR371.9.20151003T013231Z.wav_chan0.xml	0	0
03/10/2015 1:40	AMAR371.9.20151003T014031Z.wav_chan0.xml	0	0
03/10/2015 1:48	AMAR371.9.20151003T014831Z.wav_chan0.xml	5	0
03/10/2015 1:56	AMAR371.9.20151003T015631Z.wav_chan0.xml	0	0
03/10/2015 2:04	AMAR371.9.20151003T020431Z.wav_chan0.xml	0	0
03/10/2015 2:12	AMAR371.9.20151003T021231Z.wav_chan0.xml	0	0
03/10/2015 2:20	AMAR371.9.20151003T022031Z.wav_chan0.xml	0	0
03/10/2015 2:28	AMAR371.9.20151003T022831Z.wav_chan0.xml	0	0
03/10/2015 2:36	AMAR371.9.20151003T023631Z.wav_chan0.xml	0	0
03/10/2015 2:44	AMAR371.9.20151003T024431Z.wav_chan0.xml	0	0
03/10/2015 2:52	AMAR371.9.20151003T025231Z.wav_chan0.xml	0	0
03/10/2015 3:00	AMAR371.9.20151003T030031Z.wav_chan0.xml	0	0
03/10/2015 3:08	AMAR371.9.20151003T030831Z.wav_chan0.xml	0	0
03/10/2015 3:16	AMAR371.9.20151003T031631Z.wav_chan0.xml	0	0
03/10/2015 3:24	AMAR371.9.20151003T032431Z.wav_chan0.xml	0	0
03/10/2015 3:32	AMAR371.9.20151003T033231Z.wav_chan0.xml	0	0
03/10/2015 3:40	AMAR371.9.20151003T034031Z.wav_chan0.xml	0	0
03/10/2015 3:48	AMAR371.9.20151003T034831Z.wav_chan0.xml	0	0
03/10/2015 3:56	AMAR371.9.20151003T035631Z.wav_chan0.xml	0	0
03/10/2015 4:04	AMAR371.9.20151003T040431Z.wav_chan0.xml	0	0
03/10/2015 4:12	AMAR371.9.20151003T041231Z.wav_chan0.xml	0	0
03/10/2015 4:20	AMAR371.9.20151003T042031Z.wav_chan0.xml	0	0
03/10/2015 4:28	AMAR371.9.20151003T042831Z.wav_chan0.xml	0	0
03/10/2015 4:36	AMAR371.9.20151003T043631Z.wav_chan0.xml	3	0
03/10/2015 4:44	AMAR371.9.20151003T044431Z.wav_chan0.xml	0	0
03/10/2015 4:52	AMAR371.9.20151003T045231Z.wav_chan0.xml	0	0
03/10/2015 5:00	AMAR371.9.20151003T050031Z.wav_chan0.xml	0	0
03/10/2015 5:08	AMAR371.9.20151003T050831Z.wav_chan0.xml	0	0
03/10/2015 5:16	AMAR371.9.20151003T051631Z.wav_chan0.xml	0	0
03/10/2015 5:24	AMAR371.9.20151003T052431Z.wav_chan0.xml	0	0
03/10/2015 5:32	AMAR371.9.20151003T053231Z.wav_chan0.xml	0	0
03/10/2015 5:40	AMAR371.9.20151003T054031Z.wav_chan0.xml	0	0
03/10/2015 5:48	AMAR371.9.20151003T054831Z.wav_chan0.xml	0	0
03/10/2015 5:56	AMAR371.9.20151003T055631Z.wav_chan0.xml	0	0
03/10/2015 6:04	AMAR371.9.20151003T060431Z.wav_chan0.xml	0	0
03/10/2015 6:12	AMAR371.9.20151003T061231Z.wav_chan0.xml	0	0
03/10/2015 6:20	AMAR371.9.20151003T062031Z.wav_chan0.xml	0	0
03/10/2015 6:28	AMAR371.9.20151003T062831Z.wav_chan0.xml	0	0
03/10/2015 6:36	AMAR371.9.20151003T063631Z.wav_chan0.xml	0	0
03/10/2015 6:44	AMAR371.9.20151003T064431Z.wav_chan0.xml	0	0
03/10/2015 6:52	AMAR371.9.20151003T065231Z.wav_chan0.xml	0	0
03/10/2015 7:00	AMAR371.9.20151003T070031Z.wav_chan0.xml	0	0
03/10/2015 7:08	AMAR371.9.20151003T070831Z.wav_chan0.xml	0	0
03/10/2015 7:16	AMAR371.9.20151003T071631Z.wav_chan0.xml	0	0
03/10/2015 7:24	AMAR371.9.20151003T072431Z.wav_chan0.xml	0	0
03/10/2015 7:32	AMAR371.9.20151003T073231Z.wav_chan0.xml	0	0
03/10/2015 7:40	AMAR371.9.20151003T074031Z.wav_chan0.xml	0	0
03/10/2015 7:48	AMAR371.9.20151003T074831Z.wav_chan0.xml	0	0
03/10/2015 7:56	AMAR371.9.20151003T075631Z.wav_chan0.xml	0	0
03/10/2015 8:04	AMAR371.9.20151003T080431Z.wav_chan0.xml	0	0
03/10/2015 8:12	AMAR371.9.20151003T081231Z.wav_chan0.xml	0	0
03/10/2015 8:20	AMAR371.9.20151003T082031Z.wav_chan0.xml	0	0
03/10/2015 8:28	AMAR371.9.20151003T082831Z.wav_chan0.xml	0	0
03/10/2015 8:36	AMAR371.9.20151003T083631Z.wav_chan0.xml	0	0
03/10/2015 8:44	AMAR371.9.20151003T084431Z.wav_chan0.xml	0	0
03/10/2015 8:52	AMAR371.9.20151003T085231Z.wav_chan0.xml	0	0
03/10/2015 9:00	AMAR371.9.20151003T090031Z.wav_chan0.xml	0	0
03/10/2015 9:08	AMAR371.9.20151003T090831Z.wav_chan0.xml	0	0
03/10/2015 9:16	AMAR371.9.20151003T091631Z.wav_chan0.xml	0	0
03/10/2015 9:24	AMAR371.9.20151003T092431Z.wav_chan0.xml	0	0
03/10/2015 9:32	AMAR371.9.20151003T093231Z.wav_chan0.xml	0	0
03/10/2015 9:40	AMAR371.9.20151003T094031Z.wav_chan0.xml	0	0
03/10/2015 9:48	AMAR371.9.20151003T094831Z.wav_chan0.xml	0	0
03/10/2015 9:56	AMAR371.9.20151003T095631Z.wav_chan0.xml	0	0
03/10/2015 10:04	AMAR371.9.20151003T100431Z.wav_chan0.xml	0	0
03/10/2015 10:12	AMAR371.9.20151003T101231Z.wav_chan0.xml	0	0
03/10/2015 10:20	AMAR371.9.20151003T102031Z.wav_chan0.xml	0	0
03/10/2015 10:28	AMAR371.9.20151003T102831Z.wav_chan0.xml	0	0
03/10/2015 10:36	AMAR371.9.20151003T103631Z.wav_chan0.xml	0	0
03/10/2015 10:44	AMAR371.9.20151003T104431Z.wav_chan0.xml	0	0
03/10/2015 10:52	AMAR371.9.20151003T105231Z.wav_chan0.xml	0	0
03/10/2015 11:00	AMAR371.9.20151003T110031Z.wav_chan0.xml	0	0
03/10/2015 11:08	AMAR371.9.20151003T110831Z.wav_chan0.xml	0	0
03/10/2015 11:16	AMAR371.9.20151003T111631Z.wav_chan0.xml	0	0
03/10/2015 11:24	AMAR371.9.20151003T112431Z.wav_chan0.xml	0	0
03/10/2015 11:32	AMAR371.9.20151003T113231Z.wav_chan0.xml	0	0
03/10/2015 11:40	AMAR371.9.20151003T114031Z.wav_chan0.xml	0	0
03/10/2015 11:48	AMAR371.9.20151003T114831Z.wav_chan0.xml	0	0
03/10/2015 11:56	AMAR371.9.20151003T115631Z.wav_chan0.xml	0	0
03/10/2015 12:04	AMAR371.9.20151003T120431Z.wav_chan0.xml	1	0
03/10/2015 12:12	AMAR371.9.20151003T121231Z.wav_chan0.xml	1	0
03/10/2015 12:20	AMAR371.9.20151003T122031Z.wav_chan0.xml	0	0
03/10/2015 12:28	AMAR371.9.20151003T122831Z.wav_chan0.xml	0	0
03/10/2015 12:36	AMAR371.9.20151003T123631Z.wav_chan0.xml	0	0
03/10/2015 12:44	AMAR371.9.20151003T124431Z.wav_chan0.xml	0	0
03/10/2015 12:52	AMAR371.9.20151003T125231Z.wav_chan0.xml	0	0
03/10/2015 13:00	AMAR371.9.20151003T130031Z.wav_chan0.xml	0	0
03/10/2015 13:08	AMAR371.9.20151003T130831Z.wav_chan0.xml	0	0
03/10/2015 13:16	AMAR371.9.20151003T131631Z.wav_chan0.xml	0	0
03/10/2015 13:24	AMAR371.9.20151003T132431Z.wav_chan0.xml	0	0
03/10/2015 13:32	AMAR371.9.20151003T133231Z.wav_chan0.xml	0	0
03/10/2015 13:40	AMAR371.9.20151003T134031Z.wav_chan0.xml	0	0
03/10/2015 13:48	AMAR371.9.20151003T134831Z.wav_chan0.xml	0	0
03/10/2015 13:56	AMAR371.9.20151003T135631Z.wav_chan0.xml	0	0
03/10/2015 14:04	AMAR371.9.20151003T140431Z.wav_chan0.xml	0	0
03/10/2015 14:12	AMAR371.9.20151003T141231Z.wav_chan0.xml	0	0
03/10/2015 14:20	AMAR371.9.20151003T142031Z.wav_chan0.xml	0	0
03/10/2015 14:28	AMAR371.9.20151003T142831Z.wav_chan0.xml	0	0
03/10/2015 14:36	AMAR371.9.20151003T143631Z.wav_chan0.xml	0	0
03/10/2015 14:44	AMAR371.9.20151003T144431Z.wav_chan0.xml	0	0
03/10/2015 14:52	AMAR371.9.20151003T145231Z.wav_chan0.xml	0	0
03/10/2015 15:00	AMAR371.9.20151003T150031Z.wav_chan0.xml	0	0
03/10/2015 15:08	AMAR371.9.20151003T150831Z.wav_chan0.xml	0	0
03/10/2015 15:16	AMAR371.9.20151003T151631Z.wav_chan0.xml	0	0
03/10/2015 15:24	AMAR371.9.20151003T152431Z.wav_chan0.xml	0	0
03/10/2015 15:32	AMAR371.9.20151003T153231Z.wav_chan0.xml	0	0
03/10/2015 15:40	AMAR371.9.20151003T154031Z.wav_chan0.xml	0	0
03/10/2015 15:48	AMAR371.9.20151003T154831Z.wav_chan0.xml	0	0
03/10/2015 15:56	AMAR371.9.20151003T155631Z.wav_chan0.xml	0	0
03/10/2015 16:04	AMAR371.9.20151003T160431Z.wav_chan0.xml	0	0
03/10/2015 16:12	AMAR371.9.20151003T161231Z.wav_chan0.xml	0	0
03/10/2015 16:20	AMAR371.9.20151003T162031Z.wav_chan0.xml	0	0
03/10/2015 16:28	AMAR371.9.20151003T162831Z.wav_chan0.xml	0	0
03/10/2015 16:36	AMAR371.9.20151003T163631Z.wav_chan0.xml	0	0
03/10/2015 16:44	AMAR371.9.20151003T164431Z.wav_chan0.xml	0	0
03/10/2015 16:52	AMAR371.9.20151003T165231Z.wav_chan0.xml	0	0
03/10/2015 17:00	AMAR371.9.20151003T170031Z.wav_chan0.xml	0	0
03/10/2015 17:08	AMAR371.9.20151003T170831Z.wav_chan0.xml	0	0
03/10/2015 17:16	AMAR371.9.20151003T171631Z.wav_chan0.xml	0	0
03/10/2015 17:24	AMAR371.9.20151003T172431Z.wav_chan0.xml	0	0
03/10/2015 17:32	AMAR371.9.20151003T173231Z.wav_chan0.xml	0	0
03/10/2015 17:40	AMAR371.9.20151003T174031Z.wav_chan0.xml	0	0
03/10/2015 17:48	AMAR371.9.20151003T174831Z.wav_chan0.xml	0	0
03/10/2015 17:56	AMAR371.9.20151003T175631Z.wav_chan0.xml	0	0
03/10/2015 18:04	AMAR371.9.20151003T180431Z.wav_chan0.xml	0	0
03/10/2015 18:12	AMAR371.9.20151003T181231Z.wav_chan0.xml	0	0
03/10/2015 18:20	AMAR371.9.20151003T182031Z.wav_chan0.xml	0	0
03/10/2015 18:28	AMAR371.9.20151003T182831Z.wav_chan0.xml	0	0
03/10/2015 18:36	AMAR371.9.20151003T183631Z.wav_chan0.xml	0	0
03/10/2015 18:44	AMAR371.9.20151003T184431Z.wav_chan0.xml	0	0
03/10/2015 18:52	AMAR371.9.20151003T185231Z.wav_chan0.xml	0	0
03/10/2015 19:00	AMAR371.9.20151003T190031Z.wav_chan0.xml	0	0
03/10/2015 19:08	AMAR371.9.20151003T190831Z.wav_chan0.xml	0	0
03/10/2015 19:16	AMAR371.9.20151003T191631Z.wav_chan0.xml	0	0
03/10/2015 19:24	AMAR371.9.20151003T192431Z.wav_chan0.xml	0	0
03/10/2015 19:32	AMAR371.9.20151003T193231Z.wav_chan0.xml	0	0
03/10/2015 19:40	AMAR371.9.20151003T194031Z.wav_chan0.xml	0	0
03/10/2015 19:48	AMAR371.9.20151003T194831Z.wav_chan0.xml	0	0
03/10/2015 19:56	AMAR371.9.20151003T195631Z.wav_chan0.xml	0	0
03/10/2015 20:04	AMAR371.9.20151003T200431Z.wav_chan0.xml	0	0
03/10/2015 20:12	AMAR371.9.20151003T201231Z.wav_chan0.xml	0	0
03/10/2015 20:20	AMAR371.9.20151003T202031Z.wav_chan0.xml	0	0
03/10/2015 20:28	AMAR371.9.20151003T202831Z.wav_chan0.xml	0	0
03/10/2015 20:36	AMAR371.9.20151003T203631Z.wav_chan0.xml	0	0
03/10/2015 20:44	AMAR371.9.20151003T204431Z.wav_chan0.xml	0	0
03/10/2015 20:52	AMAR371.9.20151003T205231Z.wav_chan0.xml	0	0
03/10/2015 21:00	AMAR371.9.20151003T210031Z.wav_chan0.xml	0	0
03/10/2015 21:08	AMAR371.9.20151003T210831Z.wav_chan0.xml	0	0
03/10/2015 21:16	AMAR371.9.20151003T211631Z.wav_chan0.xml	0	0
03/10/2015 21:24	AMAR371.9.20151003T212431Z.wav_chan0.xml	0	0
03/10/2015 21:32	AMAR371.9.20151003T213231Z.wav_chan0.xml	0	0
03/10/2015 21:40	AMAR371.9.20151003T214031Z.wav_chan0.xml	0	0
03/10/2015 21:48	AMAR371.9.20151003T214831Z.wav_chan0.xml	0	0
03/10/2015 21:56	AMAR371.9.20151003T215631Z.wav_chan0.xml	0	0
03/10/2015 22:04	AMAR371.9.20151003T220431Z.wav_chan0.xml	0	0
03/10/2015 22:12	AMAR371.9.20151003T221231Z.wav_chan0.xml	0	0
03/10/2015 22:20	AMAR371.9.20151003T222031Z.wav_chan0.xml	0	0
03/10/2015 22:28	AMAR371.9.20151003T222831Z.wav_chan0.xml	0	0
03/10/2015 22:36	AMAR371.9.20151003T223631Z.wav_chan0.xml	0	0
03/10/2015 22:44	AMAR371.9.20151003T224431Z.wav_chan0.xml	0	0
03/10/2015 22:52	AMAR371.9.20151003T225231Z.wav_chan0.xml	0	0
03/10/2015 23:00	AMAR371.9.20151003T230031Z.wav_chan0.xml	0	0
03/10/2015 23:08	AMAR371.9.20151003T230831Z.wav_chan0.xml	0	0
03/10/2015 23:16	AMAR371.9.20151003T231631Z.wav_chan0.xml	0	0
03/10/2015 23:24	AMAR371.9.20151003T232431Z.wav_chan0.xml	0	0
03/10/2015 23:32	AMAR371.9.20151003T233231Z.wav_chan0.xml	0	0
03/10/2015 23:40	AMAR371.9.20151003T234031Z.wav_chan0.xml	0	0
03/10/2015 23:48	AMAR371.9.20151003T234831Z.wav_chan0.xml	0	0
03/10/2015 23:56	AMAR371.9.20151003T235631Z.wav_chan0.xml	0	0
03/09/2015 0:04	AMAR371.9.20150903T000431Z.wav_chan0.xml	0	0
03/09/2015 0:12	AMAR371.9.20150903T001231Z.wav_chan0.xml	0	0
03/09/2015 0:20	AMAR371.9.20150903T002031Z.wav_chan0.xml	0	0
03/09/2015 0:28	AMAR371.9.20150903T002831Z.wav_chan0.xml	0	0
03/09/2015 0:36	AMAR371.9.20150903T003631Z.wav_chan0.xml	0	0
03/09/2015 0:44	AMAR371.9.20150903T004431Z.wav_chan0.xml	0	0
03/09/2015 0:52	AMAR371.9.20150903T005231Z.wav_chan0.xml	0	0
03/09/2015 1:00	AMAR371.9.20150903T010031Z.wav_chan0.xml	0	0
03/09/2015 1:08	AMAR371.9.20150903T010831Z.wav_chan0.xml	0	0
03/09/2015 1:16	AMAR371.9.20150903T011631Z.wav_chan0.xml	0	0
03/09/2015 1:24	AMAR371.9.20150903T012431Z.wav_chan0.xml	0	0
03/09/2015 1:32	AMAR371.9.20150903T013231Z.wav_chan0.xml	0	0
03/09/2015 1:40	AMAR371.9.20150903T014031Z.wav_chan0.xml	0	0
03/09/2015 1:48	AMAR371.9.20150903T014831Z.wav_chan0.xml	0	0
03/09/2015 1:56	AMAR371.9.20150903T015631Z.wav_chan0.xml	0	0
03/09/2015 2:04	AMAR371.9.20150903T020431Z.wav_chan0.xml	0	0
03/09/2015 2:12	AMAR371.9.20150903T021231Z.wav_chan0.xml	0	0
03/09/2015 2:20	AMAR371.9.20150903T022031Z.wav_chan0.xml	0	0
03/09/2015 2:28	AMAR371.9.20150903T022831Z.wav_chan0.xml	0	0
[truncated: 17,068 more rows]
