# Supplementary material for: Signals from the deep: Spatial and temporal acoustic occurrence of beaked whales off western Ireland
Source: PLoS One. 2018 Jun 21;13(6):e0199431. doi: 10.1371/journal.pone.0199431 (PMC6013249; doi:10.1371/journal.pone.0199431)
Supplement: S7 Dataset — (CSV) [file pone.0199431.s007.csv]

Time	File	Sowerbys
01/08/2015 0:06	AMAR382.9.20150801T000646Z.wav_chan0.xml	0
01/08/2015 0:14	AMAR382.9.20150801T001446Z.wav_chan0.xml	0
01/08/2015 0:22	AMAR382.9.20150801T002246Z.wav_chan0.xml	0
01/08/2015 0:30	AMAR382.9.20150801T003046Z.wav_chan0.xml	0
01/08/2015 0:38	AMAR382.9.20150801T003846Z.wav_chan0.xml	0
01/08/2015 0:46	AMAR382.9.20150801T004646Z.wav_chan0.xml	0
01/08/2015 0:54	AMAR382.9.20150801T005446Z.wav_chan0.xml	0
01/08/2015 1:02	AMAR382.9.20150801T010246Z.wav_chan0.xml	0
01/08/2015 1:10	AMAR382.9.20150801T011046Z.wav_chan0.xml	0
01/08/2015 1:18	AMAR382.9.20150801T011846Z.wav_chan0.xml	0
01/08/2015 1:26	AMAR382.9.20150801T012646Z.wav_chan0.xml	0
01/08/2015 1:34	AMAR382.9.20150801T013446Z.wav_chan0.xml	0
01/08/2015 1:42	AMAR382.9.20150801T014246Z.wav_chan0.xml	0
01/08/2015 1:50	AMAR382.9.20150801T015046Z.wav_chan0.xml	0
01/08/2015 1:58	AMAR382.9.20150801T015846Z.wav_chan0.xml	0
01/08/2015 2:06	AMAR382.9.20150801T020646Z.wav_chan0.xml	0
01/08/2015 2:14	AMAR382.9.20150801T021446Z.wav_chan0.xml	0
01/08/2015 2:22	AMAR382.9.20150801T022246Z.wav_chan0.xml	0
01/08/2015 2:30	AMAR382.9.20150801T023046Z.wav_chan0.xml	0
01/08/2015 2:38	AMAR382.9.20150801T023846Z.wav_chan0.xml	0
01/08/2015 2:46	AMAR382.9.20150801T024646Z.wav_chan0.xml	0
01/08/2015 2:54	AMAR382.9.20150801T025446Z.wav_chan0.xml	0
01/08/2015 3:02	AMAR382.9.20150801T030246Z.wav_chan0.xml	0
01/08/2015 3:10	AMAR382.9.20150801T031046Z.wav_chan0.xml	0
01/08/2015 3:18	AMAR382.9.20150801T031846Z.wav_chan0.xml	0
01/08/2015 3:26	AMAR382.9.20150801T032646Z.wav_chan0.xml	0
01/08/2015 3:34	AMAR382.9.20150801T033446Z.wav_chan0.xml	0
01/08/2015 3:42	AMAR382.9.20150801T034246Z.wav_chan0.xml	0
01/08/2015 3:50	AMAR382.9.20150801T035046Z.wav_chan0.xml	0
01/08/2015 3:58	AMAR382.9.20150801T035846Z.wav_chan0.xml	0
01/08/2015 4:06	AMAR382.9.20150801T040646Z.wav_chan0.xml	0
01/08/2015 4:14	AMAR382.9.20150801T041446Z.wav_chan0.xml	0
01/08/2015 4:22	AMAR382.9.20150801T042246Z.wav_chan0.xml	0
01/08/2015 4:30	AMAR382.9.20150801T043046Z.wav_chan0.xml	0
01/08/2015 4:38	AMAR382.9.20150801T043846Z.wav_chan0.xml	0
01/08/2015 4:46	AMAR382.9.20150801T044646Z.wav_chan0.xml	0
01/08/2015 4:54	AMAR382.9.20150801T045446Z.wav_chan0.xml	0
01/08/2015 5:02	AMAR382.9.20150801T050246Z.wav_chan0.xml	0
01/08/2015 5:10	AMAR382.9.20150801T051046Z.wav_chan0.xml	0
01/08/2015 5:18	AMAR382.9.20150801T051846Z.wav_chan0.xml	0
01/08/2015 5:26	AMAR382.9.20150801T052646Z.wav_chan0.xml	0
01/08/2015 5:34	AMAR382.9.20150801T053446Z.wav_chan0.xml	0
01/08/2015 5:42	AMAR382.9.20150801T054246Z.wav_chan0.xml	0
01/08/2015 5:50	AMAR382.9.20150801T055046Z.wav_chan0.xml	0
01/08/2015 5:58	AMAR382.9.20150801T055846Z.wav_chan0.xml	0
01/08/2015 6:06	AMAR382.9.20150801T060646Z.wav_chan0.xml	0
01/08/2015 6:14	AMAR382.9.20150801T061446Z.wav_chan0.xml	0
01/08/2015 6:22	AMAR382.9.20150801T062246Z.wav_chan0.xml	0
01/08/2015 6:30	AMAR382.9.20150801T063046Z.wav_chan0.xml	0
01/08/2015 6:38	AMAR382.9.20150801T063846Z.wav_chan0.xml	0
01/08/2015 6:46	AMAR382.9.20150801T064646Z.wav_chan0.xml	0
01/08/2015 6:54	AMAR382.9.20150801T065446Z.wav_chan0.xml	0
01/08/2015 7:02	AMAR382.9.20150801T070246Z.wav_chan0.xml	0
01/08/2015 7:10	AMAR382.9.20150801T071046Z.wav_chan0.xml	0
01/08/2015 7:18	AMAR382.9.20150801T071846Z.wav_chan0.xml	0
01/08/2015 7:26	AMAR382.9.20150801T072646Z.wav_chan0.xml	0
01/08/2015 7:34	AMAR382.9.20150801T073446Z.wav_chan0.xml	0
01/08/2015 7:42	AMAR382.9.20150801T074246Z.wav_chan0.xml	0
01/08/2015 7:50	AMAR382.9.20150801T075046Z.wav_chan0.xml	0
01/08/2015 7:58	AMAR382.9.20150801T075846Z.wav_chan0.xml	0
01/08/2015 8:06	AMAR382.9.20150801T080646Z.wav_chan0.xml	0
01/08/2015 8:14	AMAR382.9.20150801T081446Z.wav_chan0.xml	0
01/08/2015 8:22	AMAR382.9.20150801T082246Z.wav_chan0.xml	0
01/08/2015 8:30	AMAR382.9.20150801T083046Z.wav_chan0.xml	0
01/08/2015 8:38	AMAR382.9.20150801T083846Z.wav_chan0.xml	0
01/08/2015 8:46	AMAR382.9.20150801T084646Z.wav_chan0.xml	0
01/08/2015 8:54	AMAR382.9.20150801T085446Z.wav_chan0.xml	0
01/08/2015 9:02	AMAR382.9.20150801T090246Z.wav_chan0.xml	0
01/08/2015 9:10	AMAR382.9.20150801T091046Z.wav_chan0.xml	0
01/08/2015 9:18	AMAR382.9.20150801T091846Z.wav_chan0.xml	0
01/08/2015 9:26	AMAR382.9.20150801T092646Z.wav_chan0.xml	0
01/08/2015 9:34	AMAR382.9.20150801T093446Z.wav_chan0.xml	0
01/08/2015 9:42	AMAR382.9.20150801T094246Z.wav_chan0.xml	0
01/08/2015 9:50	AMAR382.9.20150801T095046Z.wav_chan0.xml	0
01/08/2015 9:58	AMAR382.9.20150801T095846Z.wav_chan0.xml	0
01/08/2015 10:06	AMAR382.9.20150801T100646Z.wav_chan0.xml	0
01/08/2015 10:14	AMAR382.9.20150801T101446Z.wav_chan0.xml	0
01/08/2015 10:22	AMAR382.9.20150801T102246Z.wav_chan0.xml	0
01/08/2015 10:30	AMAR382.9.20150801T103046Z.wav_chan0.xml	0
01/08/2015 10:38	AMAR382.9.20150801T103846Z.wav_chan0.xml	0
01/08/2015 10:46	AMAR382.9.20150801T104646Z.wav_chan0.xml	0
01/08/2015 10:54	AMAR382.9.20150801T105446Z.wav_chan0.xml	0
01/08/2015 11:02	AMAR382.9.20150801T110246Z.wav_chan0.xml	0
01/08/2015 11:10	AMAR382.9.20150801T111046Z.wav_chan0.xml	0
01/08/2015 11:18	AMAR382.9.20150801T111846Z.wav_chan0.xml	0
01/08/2015 11:26	AMAR382.9.20150801T112646Z.wav_chan0.xml	0
01/08/2015 11:34	AMAR382.9.20150801T113446Z.wav_chan0.xml	0
01/08/2015 11:42	AMAR382.9.20150801T114246Z.wav_chan0.xml	0
01/08/2015 11:50	AMAR382.9.20150801T115046Z.wav_chan0.xml	0
01/08/2015 11:58	AMAR382.9.20150801T115846Z.wav_chan0.xml	0
01/08/2015 12:06	AMAR382.9.20150801T120646Z.wav_chan0.xml	0
01/08/2015 12:14	AMAR382.9.20150801T121446Z.wav_chan0.xml	0
01/08/2015 12:22	AMAR382.9.20150801T122246Z.wav_chan0.xml	0
01/08/2015 12:30	AMAR382.9.20150801T123046Z.wav_chan0.xml	0
01/08/2015 12:38	AMAR382.9.20150801T123846Z.wav_chan0.xml	0
01/08/2015 12:46	AMAR382.9.20150801T124646Z.wav_chan0.xml	0
01/08/2015 12:54	AMAR382.9.20150801T125446Z.wav_chan0.xml	0
01/08/2015 13:02	AMAR382.9.20150801T130246Z.wav_chan0.xml	0
01/08/2015 13:10	AMAR382.9.20150801T131046Z.wav_chan0.xml	0
01/08/2015 13:18	AMAR382.9.20150801T131846Z.wav_chan0.xml	0
01/08/2015 13:26	AMAR382.9.20150801T132646Z.wav_chan0.xml	0
01/08/2015 13:34	AMAR382.9.20150801T133446Z.wav_chan0.xml	0
01/08/2015 13:42	AMAR382.9.20150801T134246Z.wav_chan0.xml	0
01/08/2015 13:50	AMAR382.9.20150801T135046Z.wav_chan0.xml	0
01/08/2015 13:58	AMAR382.9.20150801T135846Z.wav_chan0.xml	0
01/08/2015 14:06	AMAR382.9.20150801T140646Z.wav_chan0.xml	0
01/08/2015 14:14	AMAR382.9.20150801T141446Z.wav_chan0.xml	0
01/08/2015 14:22	AMAR382.9.20150801T142246Z.wav_chan0.xml	0
01/08/2015 14:30	AMAR382.9.20150801T143046Z.wav_chan0.xml	0
01/08/2015 14:38	AMAR382.9.20150801T143846Z.wav_chan0.xml	16
01/08/2015 14:46	AMAR382.9.20150801T144646Z.wav_chan0.xml	0
01/08/2015 14:54	AMAR382.9.20150801T145446Z.wav_chan0.xml	0
01/08/2015 15:02	AMAR382.9.20150801T150246Z.wav_chan0.xml	0
01/08/2015 15:10	AMAR382.9.20150801T151046Z.wav_chan0.xml	0
01/08/2015 15:18	AMAR382.9.20150801T151846Z.wav_chan0.xml	0
01/08/2015 15:26	AMAR382.9.20150801T152646Z.wav_chan0.xml	0
01/08/2015 15:34	AMAR382.9.20150801T153446Z.wav_chan0.xml	0
01/08/2015 15:42	AMAR382.9.20150801T154246Z.wav_chan0.xml	0
01/08/2015 15:50	AMAR382.9.20150801T155046Z.wav_chan0.xml	0
01/08/2015 15:58	AMAR382.9.20150801T155846Z.wav_chan0.xml	0
01/08/2015 16:06	AMAR382.9.20150801T160646Z.wav_chan0.xml	0
01/08/2015 16:14	AMAR382.9.20150801T161446Z.wav_chan0.xml	0
01/08/2015 16:22	AMAR382.9.20150801T162246Z.wav_chan0.xml	0
01/08/2015 16:30	AMAR382.9.20150801T163046Z.wav_chan0.xml	0
01/08/2015 16:38	AMAR382.9.20150801T163846Z.wav_chan0.xml	0
01/08/2015 16:46	AMAR382.9.20150801T164646Z.wav_chan0.xml	0
01/08/2015 16:54	AMAR382.9.20150801T165446Z.wav_chan0.xml	0
01/08/2015 17:02	AMAR382.9.20150801T170246Z.wav_chan0.xml	0
01/08/2015 17:10	AMAR382.9.20150801T171046Z.wav_chan0.xml	0
01/08/2015 17:18	AMAR382.9.20150801T171846Z.wav_chan0.xml	0
01/08/2015 17:26	AMAR382.9.20150801T172646Z.wav_chan0.xml	0
01/08/2015 17:34	AMAR382.9.20150801T173446Z.wav_chan0.xml	0
01/08/2015 17:42	AMAR382.9.20150801T174246Z.wav_chan0.xml	0
01/08/2015 17:50	AMAR382.9.20150801T175046Z.wav_chan0.xml	0
01/08/2015 17:58	AMAR382.9.20150801T175846Z.wav_chan0.xml	0
01/08/2015 18:06	AMAR382.9.20150801T180646Z.wav_chan0.xml	0
01/08/2015 18:14	AMAR382.9.20150801T181446Z.wav_chan0.xml	0
01/08/2015 18:22	AMAR382.9.20150801T182246Z.wav_chan0.xml	0
01/08/2015 18:30	AMAR382.9.20150801T183046Z.wav_chan0.xml	0
01/08/2015 18:38	AMAR382.9.20150801T183846Z.wav_chan0.xml	0
01/08/2015 18:46	AMAR382.9.20150801T184646Z.wav_chan0.xml	0
01/08/2015 18:54	AMAR382.9.20150801T185446Z.wav_chan0.xml	0
01/08/2015 19:02	AMAR382.9.20150801T190246Z.wav_chan0.xml	0
01/08/2015 19:10	AMAR382.9.20150801T191046Z.wav_chan0.xml	0
01/08/2015 19:18	AMAR382.9.20150801T191846Z.wav_chan0.xml	0
01/08/2015 19:26	AMAR382.9.20150801T192646Z.wav_chan0.xml	0
01/08/2015 19:34	AMAR382.9.20150801T193446Z.wav_chan0.xml	0
01/08/2015 19:42	AMAR382.9.20150801T194246Z.wav_chan0.xml	0
01/08/2015 19:50	AMAR382.9.20150801T195046Z.wav_chan0.xml	0
01/08/2015 19:58	AMAR382.9.20150801T195846Z.wav_chan0.xml	0
01/08/2015 20:06	AMAR382.9.20150801T200646Z.wav_chan0.xml	0
01/08/2015 20:14	AMAR382.9.20150801T201446Z.wav_chan0.xml	0
01/08/2015 20:22	AMAR382.9.20150801T202246Z.wav_chan0.xml	0
01/08/2015 20:30	AMAR382.9.20150801T203046Z.wav_chan0.xml	0
01/08/2015 20:38	AMAR382.9.20150801T203846Z.wav_chan0.xml	0
01/08/2015 20:46	AMAR382.9.20150801T204646Z.wav_chan0.xml	0
01/08/2015 20:54	AMAR382.9.20150801T205446Z.wav_chan0.xml	0
01/08/2015 21:02	AMAR382.9.20150801T210246Z.wav_chan0.xml	0
01/08/2015 21:10	AMAR382.9.20150801T211046Z.wav_chan0.xml	0
01/08/2015 21:18	AMAR382.9.20150801T211846Z.wav_chan0.xml	0
01/08/2015 21:26	AMAR382.9.20150801T212646Z.wav_chan0.xml	0
01/08/2015 21:34	AMAR382.9.20150801T213446Z.wav_chan0.xml	0
01/08/2015 21:42	AMAR382.9.20150801T214246Z.wav_chan0.xml	0
01/08/2015 21:50	AMAR382.9.20150801T215046Z.wav_chan0.xml	0
01/08/2015 21:58	AMAR382.9.20150801T215846Z.wav_chan0.xml	0
01/08/2015 22:06	AMAR382.9.20150801T220646Z.wav_chan0.xml	0
01/08/2015 22:14	AMAR382.9.20150801T221446Z.wav_chan0.xml	0
01/08/2015 22:22	AMAR382.9.20150801T222246Z.wav_chan0.xml	0
01/08/2015 22:30	AMAR382.9.20150801T223046Z.wav_chan0.xml	0
01/08/2015 22:38	AMAR382.9.20150801T223846Z.wav_chan0.xml	0
01/08/2015 22:46	AMAR382.9.20150801T224646Z.wav_chan0.xml	0
01/08/2015 22:54	AMAR382.9.20150801T225446Z.wav_chan0.xml	0
01/08/2015 23:02	AMAR382.9.20150801T230246Z.wav_chan0.xml	0
01/08/2015 23:10	AMAR382.9.20150801T231046Z.wav_chan0.xml	0
01/08/2015 23:18	AMAR382.9.20150801T231846Z.wav_chan0.xml	0
01/08/2015 23:26	AMAR382.9.20150801T232646Z.wav_chan0.xml	0
01/08/2015 23:34	AMAR382.9.20150801T233446Z.wav_chan0.xml	0
01/08/2015 23:42	AMAR382.9.20150801T234246Z.wav_chan0.xml	0
01/08/2015 23:50	AMAR382.9.20150801T235046Z.wav_chan0.xml	0
01/08/2015 23:58	AMAR382.9.20150801T235846Z.wav_chan0.xml	0
01/07/2015 0:06	AMAR382.9.20150701T000646Z.wav_chan0.xml	0
01/07/2015 0:14	AMAR382.9.20150701T001446Z.wav_chan0.xml	0
01/07/2015 0:22	AMAR382.9.20150701T002246Z.wav_chan0.xml	0
01/07/2015 0:30	AMAR382.9.20150701T003046Z.wav_chan0.xml	0
01/07/2015 0:38	AMAR382.9.20150701T003846Z.wav_chan0.xml	0
01/07/2015 0:46	AMAR382.9.20150701T004646Z.wav_chan0.xml	0
01/07/2015 0:54	AMAR382.9.20150701T005446Z.wav_chan0.xml	0
01/07/2015 1:02	AMAR382.9.20150701T010246Z.wav_chan0.xml	0
01/07/2015 1:10	AMAR382.9.20150701T011046Z.wav_chan0.xml	0
01/07/2015 1:18	AMAR382.9.20150701T011846Z.wav_chan0.xml	0
01/07/2015 1:26	AMAR382.9.20150701T012646Z.wav_chan0.xml	0
01/07/2015 1:34	AMAR382.9.20150701T013446Z.wav_chan0.xml	0
01/07/2015 1:42	AMAR382.9.20150701T014246Z.wav_chan0.xml	0
01/07/2015 1:50	AMAR382.9.20150701T015046Z.wav_chan0.xml	0
01/07/2015 1:58	AMAR382.9.20150701T015846Z.wav_chan0.xml	0
01/07/2015 2:06	AMAR382.9.20150701T020646Z.wav_chan0.xml	0
01/07/2015 2:14	AMAR382.9.20150701T021446Z.wav_chan0.xml	0
01/07/2015 2:22	AMAR382.9.20150701T022246Z.wav_chan0.xml	0
01/07/2015 2:30	AMAR382.9.20150701T023046Z.wav_chan0.xml	0
01/07/2015 2:38	AMAR382.9.20150701T023846Z.wav_chan0.xml	0
01/07/2015 2:46	AMAR382.9.20150701T024646Z.wav_chan0.xml	0
01/07/2015 2:54	AMAR382.9.20150701T025446Z.wav_chan0.xml	0
01/07/2015 3:02	AMAR382.9.20150701T030246Z.wav_chan0.xml	0
01/07/2015 3:10	AMAR382.9.20150701T031046Z.wav_chan0.xml	0
01/07/2015 3:18	AMAR382.9.20150701T031846Z.wav_chan0.xml	0
01/07/2015 3:26	AMAR382.9.20150701T032646Z.wav_chan0.xml	0
01/07/2015 3:34	AMAR382.9.20150701T033446Z.wav_chan0.xml	0
01/07/2015 3:42	AMAR382.9.20150701T034246Z.wav_chan0.xml	0
01/07/2015 3:50	AMAR382.9.20150701T035046Z.wav_chan0.xml	0
01/07/2015 3:58	AMAR382.9.20150701T035846Z.wav_chan0.xml	0
01/07/2015 4:06	AMAR382.9.20150701T040646Z.wav_chan0.xml	0
01/07/2015 4:14	AMAR382.9.20150701T041446Z.wav_chan0.xml	0
01/07/2015 4:22	AMAR382.9.20150701T042246Z.wav_chan0.xml	0
01/07/2015 4:30	AMAR382.9.20150701T043046Z.wav_chan0.xml	0
01/07/2015 4:38	AMAR382.9.20150701T043846Z.wav_chan0.xml	0
01/07/2015 4:46	AMAR382.9.20150701T044646Z.wav_chan0.xml	0
01/07/2015 4:54	AMAR382.9.20150701T045446Z.wav_chan0.xml	0
01/07/2015 5:02	AMAR382.9.20150701T050246Z.wav_chan0.xml	0
01/07/2015 5:10	AMAR382.9.20150701T051046Z.wav_chan0.xml	0
01/07/2015 5:18	AMAR382.9.20150701T051846Z.wav_chan0.xml	0
01/07/2015 5:26	AMAR382.9.20150701T052646Z.wav_chan0.xml	0
01/07/2015 5:34	AMAR382.9.20150701T053446Z.wav_chan0.xml	0
01/07/2015 5:42	AMAR382.9.20150701T054246Z.wav_chan0.xml	0
01/07/2015 5:50	AMAR382.9.20150701T055046Z.wav_chan0.xml	0
01/07/2015 5:58	AMAR382.9.20150701T055846Z.wav_chan0.xml	0
01/07/2015 6:06	AMAR382.9.20150701T060646Z.wav_chan0.xml	0
01/07/2015 6:14	AMAR382.9.20150701T061446Z.wav_chan0.xml	0
01/07/2015 6:22	AMAR382.9.20150701T062246Z.wav_chan0.xml	0
01/07/2015 6:30	AMAR382.9.20150701T063046Z.wav_chan0.xml	0
01/07/2015 6:38	AMAR382.9.20150701T063846Z.wav_chan0.xml	0
01/07/2015 6:46	AMAR382.9.20150701T064646Z.wav_chan0.xml	0
01/07/2015 6:54	AMAR382.9.20150701T065446Z.wav_chan0.xml	0
01/07/2015 7:02	AMAR382.9.20150701T070246Z.wav_chan0.xml	0
01/07/2015 7:10	AMAR382.9.20150701T071046Z.wav_chan0.xml	0
01/07/2015 7:18	AMAR382.9.20150701T071846Z.wav_chan0.xml	0
01/07/2015 7:26	AMAR382.9.20150701T072646Z.wav_chan0.xml	0
01/07/2015 7:34	AMAR382.9.20150701T073446Z.wav_chan0.xml	0
01/07/2015 7:42	AMAR382.9.20150701T074246Z.wav_chan0.xml	0
01/07/2015 7:50	AMAR382.9.20150701T075046Z.wav_chan0.xml	0
01/07/2015 7:58	AMAR382.9.20150701T075846Z.wav_chan0.xml	0
01/07/2015 8:06	AMAR382.9.20150701T080646Z.wav_chan0.xml	0
01/07/2015 8:14	AMAR382.9.20150701T081446Z.wav_chan0.xml	0
01/07/2015 8:22	AMAR382.9.20150701T082246Z.wav_chan0.xml	0
01/07/2015 8:30	AMAR382.9.20150701T083046Z.wav_chan0.xml	0
01/07/2015 8:38	AMAR382.9.20150701T083846Z.wav_chan0.xml	0
01/07/2015 8:46	AMAR382.9.20150701T084646Z.wav_chan0.xml	0
01/07/2015 8:54	AMAR382.9.20150701T085446Z.wav_chan0.xml	0
01/07/2015 9:02	AMAR382.9.20150701T090246Z.wav_chan0.xml	0
01/07/2015 9:10	AMAR382.9.20150701T091046Z.wav_chan0.xml	0
01/07/2015 9:18	AMAR382.9.20150701T091846Z.wav_chan0.xml	0
01/07/2015 9:26	AMAR382.9.20150701T092646Z.wav_chan0.xml	0
01/07/2015 9:34	AMAR382.9.20150701T093446Z.wav_chan0.xml	0
01/07/2015 9:42	AMAR382.9.20150701T094246Z.wav_chan0.xml	0
01/07/2015 9:50	AMAR382.9.20150701T095046Z.wav_chan0.xml	0
01/07/2015 9:58	AMAR382.9.20150701T095846Z.wav_chan0.xml	0
01/07/2015 10:06	AMAR382.9.20150701T100646Z.wav_chan0.xml	0
01/07/2015 10:14	AMAR382.9.20150701T101446Z.wav_chan0.xml	0
01/07/2015 10:22	AMAR382.9.20150701T102246Z.wav_chan0.xml	0
01/07/2015 10:30	AMAR382.9.20150701T103046Z.wav_chan0.xml	0
01/07/2015 10:38	AMAR382.9.20150701T103846Z.wav_chan0.xml	0
01/07/2015 10:46	AMAR382.9.20150701T104646Z.wav_chan0.xml	0
01/07/2015 10:54	AMAR382.9.20150701T105446Z.wav_chan0.xml	0
01/07/2015 11:02	AMAR382.9.20150701T110246Z.wav_chan0.xml	0
01/07/2015 11:10	AMAR382.9.20150701T111046Z.wav_chan0.xml	0
01/07/2015 11:18	AMAR382.9.20150701T111846Z.wav_chan0.xml	0
01/07/2015 11:26	AMAR382.9.20150701T112646Z.wav_chan0.xml	0
01/07/2015 11:34	AMAR382.9.20150701T113446Z.wav_chan0.xml	0
01/07/2015 11:42	AMAR382.9.20150701T114246Z.wav_chan0.xml	0
01/07/2015 11:50	AMAR382.9.20150701T115046Z.wav_chan0.xml	0
01/07/2015 11:58	AMAR382.9.20150701T115846Z.wav_chan0.xml	0
01/07/2015 12:06	AMAR382.9.20150701T120646Z.wav_chan0.xml	0
01/07/2015 12:14	AMAR382.9.20150701T121446Z.wav_chan0.xml	0
01/07/2015 12:22	AMAR382.9.20150701T122246Z.wav_chan0.xml	0
01/07/2015 12:30	AMAR382.9.20150701T123046Z.wav_chan0.xml	0
01/07/2015 12:38	AMAR382.9.20150701T123846Z.wav_chan0.xml	0
01/07/2015 12:46	AMAR382.9.20150701T124646Z.wav_chan0.xml	0
01/07/2015 12:54	AMAR382.9.20150701T125446Z.wav_chan0.xml	0
01/07/2015 13:02	AMAR382.9.20150701T130246Z.wav_chan0.xml	0
01/07/2015 13:10	AMAR382.9.20150701T131046Z.wav_chan0.xml	0
01/07/2015 13:18	AMAR382.9.20150701T131846Z.wav_chan0.xml	0
01/07/2015 13:26	AMAR382.9.20150701T132646Z.wav_chan0.xml	0
01/07/2015 13:34	AMAR382.9.20150701T133446Z.wav_chan0.xml	0
01/07/2015 13:42	AMAR382.9.20150701T134246Z.wav_chan0.xml	0
01/07/2015 13:50	AMAR382.9.20150701T135046Z.wav_chan0.xml	0
01/07/2015 13:58	AMAR382.9.20150701T135846Z.wav_chan0.xml	0
01/07/2015 14:06	AMAR382.9.20150701T140646Z.wav_chan0.xml	0
01/07/2015 14:14	AMAR382.9.20150701T141446Z.wav_chan0.xml	0
01/07/2015 14:22	AMAR382.9.20150701T142246Z.wav_chan0.xml	0
01/07/2015 14:30	AMAR382.9.20150701T143046Z.wav_chan0.xml	0
01/07/2015 14:38	AMAR382.9.20150701T143846Z.wav_chan0.xml	0
01/07/2015 14:46	AMAR382.9.20150701T144646Z.wav_chan0.xml	0
01/07/2015 14:54	AMAR382.9.20150701T145446Z.wav_chan0.xml	0
01/07/2015 15:02	AMAR382.9.20150701T150246Z.wav_chan0.xml	0
01/07/2015 15:10	AMAR382.9.20150701T151046Z.wav_chan0.xml	0
01/07/2015 15:18	AMAR382.9.20150701T151846Z.wav_chan0.xml	0
01/07/2015 15:26	AMAR382.9.20150701T152646Z.wav_chan0.xml	0
01/07/2015 15:34	AMAR382.9.20150701T153446Z.wav_chan0.xml	0
01/07/2015 15:42	AMAR382.9.20150701T154246Z.wav_chan0.xml	0
01/07/2015 15:50	AMAR382.9.20150701T155046Z.wav_chan0.xml	0
01/07/2015 15:58	AMAR382.9.20150701T155846Z.wav_chan0.xml	0
01/07/2015 16:06	AMAR382.9.20150701T160646Z.wav_chan0.xml	0
01/07/2015 16:14	AMAR382.9.20150701T161446Z.wav_chan0.xml	2
01/07/2015 16:22	AMAR382.9.20150701T162246Z.wav_chan0.xml	0
01/07/2015 16:30	AMAR382.9.20150701T163046Z.wav_chan0.xml	0
01/07/2015 16:38	AMAR382.9.20150701T163846Z.wav_chan0.xml	0
01/07/2015 16:46	AMAR382.9.20150701T164646Z.wav_chan0.xml	0
01/07/2015 16:54	AMAR382.9.20150701T165446Z.wav_chan0.xml	0
01/07/2015 17:02	AMAR382.9.20150701T170246Z.wav_chan0.xml	0
01/07/2015 17:10	AMAR382.9.20150701T171046Z.wav_chan0.xml	0
01/07/2015 17:18	AMAR382.9.20150701T171846Z.wav_chan0.xml	0
01/07/2015 17:26	AMAR382.9.20150701T172646Z.wav_chan0.xml	0
01/07/2015 17:34	AMAR382.9.20150701T173446Z.wav_chan0.xml	0
01/07/2015 17:42	AMAR382.9.20150701T174246Z.wav_chan0.xml	0
01/07/2015 17:50	AMAR382.9.20150701T175046Z.wav_chan0.xml	0
01/07/2015 17:58	AMAR382.9.20150701T175846Z.wav_chan0.xml	0
01/07/2015 18:06	AMAR382.9.20150701T180646Z.wav_chan0.xml	0
01/07/2015 18:14	AMAR382.9.20150701T181446Z.wav_chan0.xml	0
01/07/2015 18:22	AMAR382.9.20150701T182246Z.wav_chan0.xml	0
01/07/2015 18:30	AMAR382.9.20150701T183046Z.wav_chan0.xml	0
01/07/2015 18:38	AMAR382.9.20150701T183846Z.wav_chan0.xml	0
01/07/2015 18:46	AMAR382.9.20150701T184646Z.wav_chan0.xml	0
01/07/2015 18:54	AMAR382.9.20150701T185446Z.wav_chan0.xml	0
01/07/2015 19:02	AMAR382.9.20150701T190246Z.wav_chan0.xml	0
01/07/2015 19:10	AMAR382.9.20150701T191046Z.wav_chan0.xml	0
01/07/2015 19:18	AMAR382.9.20150701T191846Z.wav_chan0.xml	0
01/07/2015 19:26	AMAR382.9.20150701T192646Z.wav_chan0.xml	0
01/07/2015 19:34	AMAR382.9.20150701T193446Z.wav_chan0.xml	0
01/07/2015 19:42	AMAR382.9.20150701T194246Z.wav_chan0.xml	0
01/07/2015 19:50	AMAR382.9.20150701T195046Z.wav_chan0.xml	0
01/07/2015 19:58	AMAR382.9.20150701T195846Z.wav_chan0.xml	0
01/07/2015 20:06	AMAR382.9.20150701T200646Z.wav_chan0.xml	0
01/07/2015 20:14	AMAR382.9.20150701T201446Z.wav_chan0.xml	0
01/07/2015 20:22	AMAR382.9.20150701T202246Z.wav_chan0.xml	0
01/07/2015 20:30	AMAR382.9.20150701T203046Z.wav_chan0.xml	0
01/07/2015 20:38	AMAR382.9.20150701T203846Z.wav_chan0.xml	0
01/07/2015 20:46	AMAR382.9.20150701T204646Z.wav_chan0.xml	0
01/07/2015 20:54	AMAR382.9.20150701T205446Z.wav_chan0.xml	0
01/07/2015 21:02	AMAR382.9.20150701T210246Z.wav_chan0.xml	0
01/07/2015 21:10	AMAR382.9.20150701T211046Z.wav_chan0.xml	0
01/07/2015 21:18	AMAR382.9.20150701T211846Z.wav_chan0.xml	0
01/07/2015 21:26	AMAR382.9.20150701T212646Z.wav_chan0.xml	0
01/07/2015 21:34	AMAR382.9.20150701T213446Z.wav_chan0.xml	0
01/07/2015 21:42	AMAR382.9.20150701T214246Z.wav_chan0.xml	0
01/07/2015 21:50	AMAR382.9.20150701T215046Z.wav_chan0.xml	0
01/07/2015 21:58	AMAR382.9.20150701T215846Z.wav_chan0.xml	0
01/07/2015 22:06	AMAR382.9.20150701T220646Z.wav_chan0.xml	0
01/07/2015 22:14	AMAR382.9.20150701T221446Z.wav_chan0.xml	0
01/07/2015 22:22	AMAR382.9.20150701T222246Z.wav_chan0.xml	0
01/07/2015 22:30	AMAR382.9.20150701T223046Z.wav_chan0.xml	0
01/07/2015 22:38	AMAR382.9.20150701T223846Z.wav_chan0.xml	0
01/07/2015 22:46	AMAR382.9.20150701T224646Z.wav_chan0.xml	0
01/07/2015 22:54	AMAR382.9.20150701T225446Z.wav_chan0.xml	0
01/07/2015 23:02	AMAR382.9.20150701T230246Z.wav_chan0.xml	0
01/07/2015 23:10	AMAR382.9.20150701T231046Z.wav_chan0.xml	0
01/07/2015 23:18	AMAR382.9.20150701T231846Z.wav_chan0.xml	0
01/07/2015 23:26	AMAR382.9.20150701T232646Z.wav_chan0.xml	0
01/07/2015 23:34	AMAR382.9.20150701T233446Z.wav_chan0.xml	0
01/07/2015 23:42	AMAR382.9.20150701T234246Z.wav_chan0.xml	0
01/07/2015 23:50	AMAR382.9.20150701T235046Z.wav_chan0.xml	0
01/07/2015 23:58	AMAR382.9.20150701T235846Z.wav_chan0.xml	0
01/06/2015 0:06	AMAR382.9.20150601T000646Z.wav_chan0.xml	0
01/06/2015 0:14	AMAR382.9.20150601T001446Z.wav_chan0.xml	0
01/06/2015 0:22	AMAR382.9.20150601T002246Z.wav_chan0.xml	0
01/06/2015 0:30	AMAR382.9.20150601T003046Z.wav_chan0.xml	0
01/06/2015 0:38	AMAR382.9.20150601T003846Z.wav_chan0.xml	0
01/06/2015 0:46	AMAR382.9.20150601T004646Z.wav_chan0.xml	0
01/06/2015 0:54	AMAR382.9.20150601T005446Z.wav_chan0.xml	0
01/06/2015 1:02	AMAR382.9.20150601T010246Z.wav_chan0.xml	0
01/06/2015 1:10	AMAR382.9.20150601T011046Z.wav_chan0.xml	0
01/06/2015 1:18	AMAR382.9.20150601T011846Z.wav_chan0.xml	0
01/06/2015 1:26	AMAR382.9.20150601T012646Z.wav_chan0.xml	0
01/06/2015 1:34	AMAR382.9.20150601T013446Z.wav_chan0.xml	0
01/06/2015 1:42	AMAR382.9.20150601T014246Z.wav_chan0.xml	0
01/06/2015 1:50	AMAR382.9.20150601T015046Z.wav_chan0.xml	0
01/06/2015 1:58	AMAR382.9.20150601T015846Z.wav_chan0.xml	0
01/06/2015 2:06	AMAR382.9.20150601T020646Z.wav_chan0.xml	0
01/06/2015 2:14	AMAR382.9.20150601T021446Z.wav_chan0.xml	0
01/06/2015 2:22	AMAR382.9.20150601T022246Z.wav_chan0.xml	0
01/06/2015 2:30	AMAR382.9.20150601T023046Z.wav_chan0.xml	0
01/06/2015 2:38	AMAR382.9.20150601T023846Z.wav_chan0.xml	0
01/06/2015 2:46	AMAR382.9.20150601T024646Z.wav_chan0.xml	0
01/06/2015 2:54	AMAR382.9.20150601T025446Z.wav_chan0.xml	0
01/06/2015 3:02	AMAR382.9.20150601T030246Z.wav_chan0.xml	0
01/06/2015 3:10	AMAR382.9.20150601T031046Z.wav_chan0.xml	0
01/06/2015 3:18	AMAR382.9.20150601T031846Z.wav_chan0.xml	0
01/06/2015 3:26	AMAR382.9.20150601T032646Z.wav_chan0.xml	0
01/06/2015 3:34	AMAR382.9.20150601T033446Z.wav_chan0.xml	0
01/06/2015 3:42	AMAR382.9.20150601T034246Z.wav_chan0.xml	0
01/06/2015 3:50	AMAR382.9.20150601T035046Z.wav_chan0.xml	0
01/06/2015 3:58	AMAR382.9.20150601T035846Z.wav_chan0.xml	0
01/06/2015 4:06	AMAR382.9.20150601T040646Z.wav_chan0.xml	0
01/06/2015 4:14	AMAR382.9.20150601T041446Z.wav_chan0.xml	0
01/06/2015 4:22	AMAR382.9.20150601T042246Z.wav_chan0.xml	0
01/06/2015 4:30	AMAR382.9.20150601T043046Z.wav_chan0.xml	0
01/06/2015 4:38	AMAR382.9.20150601T043846Z.wav_chan0.xml	0
01/06/2015 4:46	AMAR382.9.20150601T044646Z.wav_chan0.xml	0
01/06/2015 4:54	AMAR382.9.20150601T045446Z.wav_chan0.xml	0
01/06/2015 5:02	AMAR382.9.20150601T050246Z.wav_chan0.xml	0
01/06/2015 5:10	AMAR382.9.20150601T051046Z.wav_chan0.xml	0
01/06/2015 5:18	AMAR382.9.20150601T051846Z.wav_chan0.xml	0
01/06/2015 5:26	AMAR382.9.20150601T052646Z.wav_chan0.xml	0
01/06/2015 5:34	AMAR382.9.20150601T053446Z.wav_chan0.xml	0
01/06/2015 5:42	AMAR382.9.20150601T054246Z.wav_chan0.xml	0
01/06/2015 5:50	AMAR382.9.20150601T055046Z.wav_chan0.xml	0
01/06/2015 5:58	AMAR382.9.20150601T055846Z.wav_chan0.xml	0
01/06/2015 6:06	AMAR382.9.20150601T060646Z.wav_chan0.xml	0
01/06/2015 6:14	AMAR382.9.20150601T061446Z.wav_chan0.xml	0
01/06/2015 6:22	AMAR382.9.20150601T062246Z.wav_chan0.xml	0
01/06/2015 6:30	AMAR382.9.20150601T063046Z.wav_chan0.xml	0
01/06/2015 6:38	AMAR382.9.20150601T063846Z.wav_chan0.xml	0
01/06/2015 6:46	AMAR382.9.20150601T064646Z.wav_chan0.xml	0
01/06/2015 6:54	AMAR382.9.20150601T065446Z.wav_chan0.xml	0
01/06/2015 7:02	AMAR382.9.20150601T070246Z.wav_chan0.xml	0
01/06/2015 7:10	AMAR382.9.20150601T071046Z.wav_chan0.xml	0
01/06/2015 7:18	AMAR382.9.20150601T071846Z.wav_chan0.xml	0
01/06/2015 7:26	AMAR382.9.20150601T072646Z.wav_chan0.xml	0
01/06/2015 7:34	AMAR382.9.20150601T073446Z.wav_chan0.xml	0
01/06/2015 7:42	AMAR382.9.20150601T074246Z.wav_chan0.xml	0
01/06/2015 7:50	AMAR382.9.20150601T075046Z.wav_chan0.xml	0
01/06/2015 7:58	AMAR382.9.20150601T075846Z.wav_chan0.xml	0
01/06/2015 8:06	AMAR382.9.20150601T080646Z.wav_chan0.xml	0
01/06/2015 8:14	AMAR382.9.20150601T081446Z.wav_chan0.xml	0
01/06/2015 8:22	AMAR382.9.20150601T082246Z.wav_chan0.xml	0
01/06/2015 8:30	AMAR382.9.20150601T083046Z.wav_chan0.xml	0
01/06/2015 8:38	AMAR382.9.20150601T083846Z.wav_chan0.xml	0
01/06/2015 8:46	AMAR382.9.20150601T084646Z.wav_chan0.xml	0
01/06/2015 8:54	AMAR382.9.20150601T085446Z.wav_chan0.xml	0
01/06/2015 9:02	AMAR382.9.20150601T090246Z.wav_chan0.xml	0
01/06/2015 9:10	AMAR382.9.20150601T091046Z.wav_chan0.xml	0
01/06/2015 9:18	AMAR382.9.20150601T091846Z.wav_chan0.xml	0
01/06/2015 9:26	AMAR382.9.20150601T092646Z.wav_chan0.xml	0
01/06/2015 9:34	AMAR382.9.20150601T093446Z.wav_chan0.xml	0
01/06/2015 9:42	AMAR382.9.20150601T094246Z.wav_chan0.xml	0
01/06/2015 9:50	AMAR382.9.20150601T095046Z.wav_chan0.xml	0
01/06/2015 9:58	AMAR382.9.20150601T095846Z.wav_chan0.xml	0
01/06/2015 10:06	AMAR382.9.20150601T100646Z.wav_chan0.xml	0
01/06/2015 10:14	AMAR382.9.20150601T101446Z.wav_chan0.xml	0
01/06/2015 10:22	AMAR382.9.20150601T102246Z.wav_chan0.xml	0
01/06/2015 10:30	AMAR382.9.20150601T103046Z.wav_chan0.xml	0
01/06/2015 10:38	AMAR382.9.20150601T103846Z.wav_chan0.xml	0
01/06/2015 10:46	AMAR382.9.20150601T104646Z.wav_chan0.xml	0
01/06/2015 10:54	AMAR382.9.20150601T105446Z.wav_chan0.xml	0
01/06/2015 11:02	AMAR382.9.20150601T110246Z.wav_chan0.xml	0
01/06/2015 11:10	AMAR382.9.20150601T111046Z.wav_chan0.xml	0
01/06/2015 11:18	AMAR382.9.20150601T111846Z.wav_chan0.xml	0
01/06/2015 11:26	AMAR382.9.20150601T112646Z.wav_chan0.xml	0
01/06/2015 11:34	AMAR382.9.20150601T113446Z.wav_chan0.xml	0
01/06/2015 11:42	AMAR382.9.20150601T114246Z.wav_chan0.xml	0
01/06/2015 11:50	AMAR382.9.20150601T115046Z.wav_chan0.xml	0
01/06/2015 11:58	AMAR382.9.20150601T115846Z.wav_chan0.xml	0
01/06/2015 12:06	AMAR382.9.20150601T120646Z.wav_chan0.xml	0
01/06/2015 12:14	AMAR382.9.20150601T121446Z.wav_chan0.xml	0
01/06/2015 12:22	AMAR382.9.20150601T122246Z.wav_chan0.xml	0
01/06/2015 12:30	AMAR382.9.20150601T123046Z.wav_chan0.xml	0
01/06/2015 12:38	AMAR382.9.20150601T123846Z.wav_chan0.xml	0
01/06/2015 12:46	AMAR382.9.20150601T124646Z.wav_chan0.xml	0
01/06/2015 12:54	AMAR382.9.20150601T125446Z.wav_chan0.xml	0
01/06/2015 13:02	AMAR382.9.20150601T130246Z.wav_chan0.xml	0
01/06/2015 13:10	AMAR382.9.20150601T131046Z.wav_chan0.xml	0
01/06/2015 13:18	AMAR382.9.20150601T131846Z.wav_chan0.xml	0
01/06/2015 13:26	AMAR382.9.20150601T132646Z.wav_chan0.xml	0
01/06/2015 13:34	AMAR382.9.20150601T133446Z.wav_chan0.xml	0
01/06/2015 13:42	AMAR382.9.20150601T134246Z.wav_chan0.xml	0
01/06/2015 13:50	AMAR382.9.20150601T135046Z.wav_chan0.xml	0
01/06/2015 13:58	AMAR382.9.20150601T135846Z.wav_chan0.xml	0
01/06/2015 14:06	AMAR382.9.20150601T140646Z.wav_chan0.xml	0
01/06/2015 14:14	AMAR382.9.20150601T141446Z.wav_chan0.xml	0
01/06/2015 14:22	AMAR382.9.20150601T142246Z.wav_chan0.xml	0
01/06/2015 14:30	AMAR382.9.20150601T143046Z.wav_chan0.xml	0
01/06/2015 14:38	AMAR382.9.20150601T143846Z.wav_chan0.xml	0
01/06/2015 14:46	AMAR382.9.20150601T144646Z.wav_chan0.xml	0
01/06/2015 14:54	AMAR382.9.20150601T145446Z.wav_chan0.xml	0
01/06/2015 15:02	AMAR382.9.20150601T150246Z.wav_chan0.xml	0
01/06/2015 15:10	AMAR382.9.20150601T151046Z.wav_chan0.xml	0
01/06/2015 15:18	AMAR382.9.20150601T151846Z.wav_chan0.xml	0
01/06/2015 15:26	AMAR382.9.20150601T152646Z.wav_chan0.xml	0
01/06/2015 15:34	AMAR382.9.20150601T153446Z.wav_chan0.xml	0
01/06/2015 15:42	AMAR382.9.20150601T154246Z.wav_chan0.xml	0
01/06/2015 15:50	AMAR382.9.20150601T155046Z.wav_chan0.xml	0
01/06/2015 15:58	AMAR382.9.20150601T155846Z.wav_chan0.xml	0
01/06/2015 16:06	AMAR382.9.20150601T160646Z.wav_chan0.xml	0
01/06/2015 16:14	AMAR382.9.20150601T161446Z.wav_chan0.xml	0
01/06/2015 16:22	AMAR382.9.20150601T162246Z.wav_chan0.xml	0
01/06/2015 16:30	AMAR382.9.20150601T163046Z.wav_chan0.xml	0
01/06/2015 16:38	AMAR382.9.20150601T163846Z.wav_chan0.xml	0
01/06/2015 16:46	AMAR382.9.20150601T164646Z.wav_chan0.xml	0
01/06/2015 16:54	AMAR382.9.20150601T165446Z.wav_chan0.xml	0
01/06/2015 17:02	AMAR382.9.20150601T170246Z.wav_chan0.xml	0
01/06/2015 17:10	AMAR382.9.20150601T171046Z.wav_chan0.xml	0
01/06/2015 17:18	AMAR382.9.20150601T171846Z.wav_chan0.xml	0
01/06/2015 17:26	AMAR382.9.20150601T172646Z.wav_chan0.xml	0
01/06/2015 17:34	AMAR382.9.20150601T173446Z.wav_chan0.xml	0
01/06/2015 17:42	AMAR382.9.20150601T174246Z.wav_chan0.xml	0
01/06/2015 17:50	AMAR382.9.20150601T175046Z.wav_chan0.xml	0
01/06/2015 17:58	AMAR382.9.20150601T175846Z.wav_chan0.xml	0
01/06/2015 18:06	AMAR382.9.20150601T180646Z.wav_chan0.xml	0
01/06/2015 18:14	AMAR382.9.20150601T181446Z.wav_chan0.xml	0
01/06/2015 18:22	AMAR382.9.20150601T182246Z.wav_chan0.xml	0
01/06/2015 18:30	AMAR382.9.20150601T183046Z.wav_chan0.xml	0
01/06/2015 18:38	AMAR382.9.20150601T183846Z.wav_chan0.xml	0
01/06/2015 18:46	AMAR382.9.20150601T184646Z.wav_chan0.xml	0
01/06/2015 18:54	AMAR382.9.20150601T185446Z.wav_chan0.xml	0
01/06/2015 19:02	AMAR382.9.20150601T190246Z.wav_chan0.xml	0
01/06/2015 19:10	AMAR382.9.20150601T191046Z.wav_chan0.xml	0
01/06/2015 19:18	AMAR382.9.20150601T191846Z.wav_chan0.xml	0
01/06/2015 19:26	AMAR382.9.20150601T192646Z.wav_chan0.xml	0
01/06/2015 19:34	AMAR382.9.20150601T193446Z.wav_chan0.xml	0
01/06/2015 19:42	AMAR382.9.20150601T194246Z.wav_chan0.xml	0
01/06/2015 19:50	AMAR382.9.20150601T195046Z.wav_chan0.xml	0
01/06/2015 19:58	AMAR382.9.20150601T195846Z.wav_chan0.xml	0
01/06/2015 20:06	AMAR382.9.20150601T200646Z.wav_chan0.xml	0
01/06/2015 20:14	AMAR382.9.20150601T201446Z.wav_chan0.xml	0
01/06/2015 20:22	AMAR382.9.20150601T202246Z.wav_chan0.xml	0
01/06/2015 20:30	AMAR382.9.20150601T203046Z.wav_chan0.xml	0
01/06/2015 20:38	AMAR382.9.20150601T203846Z.wav_chan0.xml	0
01/06/2015 20:46	AMAR382.9.20150601T204646Z.wav_chan0.xml	0
01/06/2015 20:54	AMAR382.9.20150601T205446Z.wav_chan0.xml	0
01/06/2015 21:02	AMAR382.9.20150601T210246Z.wav_chan0.xml	0
01/06/2015 21:10	AMAR382.9.20150601T211046Z.wav_chan0.xml	0
01/06/2015 21:18	AMAR382.9.20150601T211846Z.wav_chan0.xml	0
01/06/2015 21:26	AMAR382.9.20150601T212646Z.wav_chan0.xml	0
01/06/2015 21:34	AMAR382.9.20150601T213446Z.wav_chan0.xml	0
01/06/2015 21:42	AMAR382.9.20150601T214246Z.wav_chan0.xml	0
01/06/2015 21:50	AMAR382.9.20150601T215046Z.wav_chan0.xml	0
01/06/2015 21:58	AMAR382.9.20150601T215846Z.wav_chan0.xml	0
01/06/2015 22:06	AMAR382.9.20150601T220646Z.wav_chan0.xml	0
01/06/2015 22:14	AMAR382.9.20150601T221446Z.wav_chan0.xml	0
01/06/2015 22:22	AMAR382.9.20150601T222246Z.wav_chan0.xml	0
01/06/2015 22:30	AMAR382.9.20150601T223046Z.wav_chan0.xml	0
01/06/2015 22:38	AMAR382.9.20150601T223846Z.wav_chan0.xml	0
01/06/2015 22:46	AMAR382.9.20150601T224646Z.wav_chan0.xml	0
01/06/2015 22:54	AMAR382.9.20150601T225446Z.wav_chan0.xml	0
01/06/2015 23:02	AMAR382.9.20150601T230246Z.wav_chan0.xml	0
01/06/2015 23:10	AMAR382.9.20150601T231046Z.wav_chan0.xml	0
01/06/2015 23:18	AMAR382.9.20150601T231846Z.wav_chan0.xml	0
01/06/2015 23:26	AMAR382.9.20150601T232646Z.wav_chan0.xml	0
01/06/2015 23:34	AMAR382.9.20150601T233446Z.wav_chan0.xml	0
01/06/2015 23:42	AMAR382.9.20150601T234246Z.wav_chan0.xml	0
01/06/2015 23:50	AMAR382.9.20150601T235046Z.wav_chan0.xml	0
01/06/2015 23:58	AMAR382.9.20150601T235846Z.wav_chan0.xml	0
02/08/2015 0:06	AMAR382.9.20150802T000646Z.wav_chan0.xml	0
02/08/2015 0:14	AMAR382.9.20150802T001446Z.wav_chan0.xml	0
02/08/2015 0:22	AMAR382.9.20150802T002246Z.wav_chan0.xml	0
02/08/2015 0:30	AMAR382.9.20150802T003046Z.wav_chan0.xml	0
02/08/2015 0:38	AMAR382.9.20150802T003846Z.wav_chan0.xml	0
02/08/2015 0:46	AMAR382.9.20150802T004646Z.wav_chan0.xml	0
02/08/2015 0:54	AMAR382.9.20150802T005446Z.wav_chan0.xml	0
02/08/2015 1:02	AMAR382.9.20150802T010246Z.wav_chan0.xml	0
02/08/2015 1:10	AMAR382.9.20150802T011046Z.wav_chan0.xml	0
02/08/2015 1:18	AMAR382.9.20150802T011846Z.wav_chan0.xml	0
02/08/2015 1:26	AMAR382.9.20150802T012646Z.wav_chan0.xml	0
02/08/2015 1:34	AMAR382.9.20150802T013446Z.wav_chan0.xml	0
02/08/2015 1:42	AMAR382.9.20150802T014246Z.wav_chan0.xml	0
02/08/2015 1:50	AMAR382.9.20150802T015046Z.wav_chan0.xml	0
02/08/2015 1:58	AMAR382.9.20150802T015846Z.wav_chan0.xml	0
02/08/2015 2:06	AMAR382.9.20150802T020646Z.wav_chan0.xml	0
02/08/2015 2:14	AMAR382.9.20150802T021446Z.wav_chan0.xml	0
02/08/2015 2:22	AMAR382.9.20150802T022246Z.wav_chan0.xml	0
02/08/2015 2:30	AMAR382.9.20150802T023046Z.wav_chan0.xml	0
02/08/2015 2:38	AMAR382.9.20150802T023846Z.wav_chan0.xml	0
02/08/2015 2:46	AMAR382.9.20150802T024646Z.wav_chan0.xml	0
02/08/2015 2:54	AMAR382.9.20150802T025446Z.wav_chan0.xml	0
02/08/2015 3:02	AMAR382.9.20150802T030246Z.wav_chan0.xml	0
02/08/2015 3:10	AMAR382.9.20150802T031046Z.wav_chan0.xml	0
02/08/2015 3:18	AMAR382.9.20150802T031846Z.wav_chan0.xml	0
02/08/2015 3:26	AMAR382.9.20150802T032646Z.wav_chan0.xml	0
02/08/2015 3:34	AMAR382.9.20150802T033446Z.wav_chan0.xml	0
02/08/2015 3:42	AMAR382.9.20150802T034246Z.wav_chan0.xml	0
02/08/2015 3:50	AMAR382.9.20150802T035046Z.wav_chan0.xml	0
02/08/2015 3:58	AMAR382.9.20150802T035846Z.wav_chan0.xml	0
02/08/2015 4:06	AMAR382.9.20150802T040646Z.wav_chan0.xml	0
02/08/2015 4:14	AMAR382.9.20150802T041446Z.wav_chan0.xml	0
02/08/2015 4:22	AMAR382.9.20150802T042246Z.wav_chan0.xml	0
02/08/2015 4:30	AMAR382.9.20150802T043046Z.wav_chan0.xml	0
02/08/2015 4:38	AMAR382.9.20150802T043846Z.wav_chan0.xml	0
02/08/2015 4:46	AMAR382.9.20150802T044646Z.wav_chan0.xml	0
02/08/2015 4:54	AMAR382.9.20150802T045446Z.wav_chan0.xml	0
02/08/2015 5:02	AMAR382.9.20150802T050246Z.wav_chan0.xml	0
02/08/2015 5:10	AMAR382.9.20150802T051046Z.wav_chan0.xml	0
02/08/2015 5:18	AMAR382.9.20150802T051846Z.wav_chan0.xml	0
02/08/2015 5:26	AMAR382.9.20150802T052646Z.wav_chan0.xml	0
02/08/2015 5:34	AMAR382.9.20150802T053446Z.wav_chan0.xml	0
02/08/2015 5:42	AMAR382.9.20150802T054246Z.wav_chan0.xml	0
02/08/2015 5:50	AMAR382.9.20150802T055046Z.wav_chan0.xml	0
02/08/2015 5:58	AMAR382.9.20150802T055846Z.wav_chan0.xml	0
02/08/2015 6:06	AMAR382.9.20150802T060646Z.wav_chan0.xml	0
02/08/2015 6:14	AMAR382.9.20150802T061446Z.wav_chan0.xml	0
02/08/2015 6:22	AMAR382.9.20150802T062246Z.wav_chan0.xml	0
02/08/2015 6:30	AMAR382.9.20150802T063046Z.wav_chan0.xml	0
02/08/2015 6:38	AMAR382.9.20150802T063846Z.wav_chan0.xml	0
02/08/2015 6:46	AMAR382.9.20150802T064646Z.wav_chan0.xml	0
02/08/2015 6:54	AMAR382.9.20150802T065446Z.wav_chan0.xml	0
02/08/2015 7:02	AMAR382.9.20150802T070246Z.wav_chan0.xml	0
02/08/2015 7:10	AMAR382.9.20150802T071046Z.wav_chan0.xml	0
02/08/2015 7:18	AMAR382.9.20150802T071846Z.wav_chan0.xml	0
02/08/2015 7:26	AMAR382.9.20150802T072646Z.wav_chan0.xml	0
02/08/2015 7:34	AMAR382.9.20150802T073446Z.wav_chan0.xml	0
02/08/2015 7:42	AMAR382.9.20150802T074246Z.wav_chan0.xml	0
02/08/2015 7:50	AMAR382.9.20150802T075046Z.wav_chan0.xml	0
02/08/2015 7:58	AMAR382.9.20150802T075846Z.wav_chan0.xml	0
02/08/2015 8:06	AMAR382.9.20150802T080646Z.wav_chan0.xml	0
02/08/2015 8:14	AMAR382.9.20150802T081446Z.wav_chan0.xml	0
02/08/2015 8:22	AMAR382.9.20150802T082246Z.wav_chan0.xml	0
02/08/2015 8:30	AMAR382.9.20150802T083046Z.wav_chan0.xml	0
02/08/2015 8:38	AMAR382.9.20150802T083846Z.wav_chan0.xml	0
02/08/2015 8:46	AMAR382.9.20150802T084646Z.wav_chan0.xml	0
02/08/2015 8:54	AMAR382.9.20150802T085446Z.wav_chan0.xml	0
02/08/2015 9:02	AMAR382.9.20150802T090246Z.wav_chan0.xml	0
02/08/2015 9:10	AMAR382.9.20150802T091046Z.wav_chan0.xml	0
02/08/2015 9:18	AMAR382.9.20150802T091846Z.wav_chan0.xml	0
02/08/2015 9:26	AMAR382.9.20150802T092646Z.wav_chan0.xml	0
02/08/2015 9:34	AMAR382.9.20150802T093446Z.wav_chan0.xml	0
02/08/2015 9:42	AMAR382.9.20150802T094246Z.wav_chan0.xml	0
02/08/2015 9:50	AMAR382.9.20150802T095046Z.wav_chan0.xml	0
02/08/2015 9:58	AMAR382.9.20150802T095846Z.wav_chan0.xml	0
02/08/2015 10:06	AMAR382.9.20150802T100646Z.wav_chan0.xml	0
02/08/2015 10:14	AMAR382.9.20150802T101446Z.wav_chan0.xml	0
02/08/2015 10:22	AMAR382.9.20150802T102246Z.wav_chan0.xml	0
02/08/2015 10:30	AMAR382.9.20150802T103046Z.wav_chan0.xml	0
02/08/2015 10:38	AMAR382.9.20150802T103846Z.wav_chan0.xml	0
02/08/2015 10:46	AMAR382.9.20150802T104646Z.wav_chan0.xml	0
02/08/2015 10:54	AMAR382.9.20150802T105446Z.wav_chan0.xml	0
02/08/2015 11:02	AMAR382.9.20150802T110246Z.wav_chan0.xml	0
02/08/2015 11:10	AMAR382.9.20150802T111046Z.wav_chan0.xml	0
02/08/2015 11:18	AMAR382.9.20150802T111846Z.wav_chan0.xml	0
02/08/2015 11:26	AMAR382.9.20150802T112646Z.wav_chan0.xml	0
02/08/2015 11:34	AMAR382.9.20150802T113446Z.wav_chan0.xml	0
02/08/2015 11:42	AMAR382.9.20150802T114246Z.wav_chan0.xml	0
02/08/2015 11:50	AMAR382.9.20150802T115046Z.wav_chan0.xml	0
02/08/2015 11:58	AMAR382.9.20150802T115846Z.wav_chan0.xml	0
02/08/2015 12:06	AMAR382.9.20150802T120646Z.wav_chan0.xml	0
02/08/2015 12:14	AMAR382.9.20150802T121446Z.wav_chan0.xml	0
02/08/2015 12:22	AMAR382.9.20150802T122246Z.wav_chan0.xml	0
02/08/2015 12:30	AMAR382.9.20150802T123046Z.wav_chan0.xml	0
02/08/2015 12:38	AMAR382.9.20150802T123846Z.wav_chan0.xml	0
02/08/2015 12:46	AMAR382.9.20150802T124646Z.wav_chan0.xml	0
02/08/2015 12:54	AMAR382.9.20150802T125446Z.wav_chan0.xml	0
02/08/2015 13:02	AMAR382.9.20150802T130246Z.wav_chan0.xml	0
02/08/2015 13:10	AMAR382.9.20150802T131046Z.wav_chan0.xml	0
02/08/2015 13:18	AMAR382.9.20150802T131846Z.wav_chan0.xml	0
02/08/2015 13:26	AMAR382.9.20150802T132646Z.wav_chan0.xml	0
02/08/2015 13:34	AMAR382.9.20150802T133446Z.wav_chan0.xml	0
02/08/2015 13:42	AMAR382.9.20150802T134246Z.wav_chan0.xml	0
02/08/2015 13:50	AMAR382.9.20150802T135046Z.wav_chan0.xml	0
02/08/2015 13:58	AMAR382.9.20150802T135846Z.wav_chan0.xml	0
02/08/2015 14:06	AMAR382.9.20150802T140646Z.wav_chan0.xml	0
02/08/2015 14:14	AMAR382.9.20150802T141446Z.wav_chan0.xml	0
02/08/2015 14:22	AMAR382.9.20150802T142246Z.wav_chan0.xml	0
02/08/2015 14:30	AMAR382.9.20150802T143046Z.wav_chan0.xml	0
02/08/2015 14:38	AMAR382.9.20150802T143846Z.wav_chan0.xml	0
02/08/2015 14:46	AMAR382.9.20150802T144646Z.wav_chan0.xml	0
02/08/2015 14:54	AMAR382.9.20150802T145446Z.wav_chan0.xml	0
02/08/2015 15:02	AMAR382.9.20150802T150246Z.wav_chan0.xml	0
02/08/2015 15:10	AMAR382.9.20150802T151046Z.wav_chan0.xml	0
02/08/2015 15:18	AMAR382.9.20150802T151846Z.wav_chan0.xml	0
02/08/2015 15:26	AMAR382.9.20150802T152646Z.wav_chan0.xml	0
02/08/2015 15:34	AMAR382.9.20150802T153446Z.wav_chan0.xml	0
02/08/2015 15:42	AMAR382.9.20150802T154246Z.wav_chan0.xml	0
02/08/2015 15:50	AMAR382.9.20150802T155046Z.wav_chan0.xml	0
02/08/2015 15:58	AMAR382.9.20150802T155846Z.wav_chan0.xml	0
02/08/2015 16:06	AMAR382.9.20150802T160646Z.wav_chan0.xml	0
02/08/2015 16:14	AMAR382.9.20150802T161446Z.wav_chan0.xml	0
02/08/2015 16:22	AMAR382.9.20150802T162246Z.wav_chan0.xml	0
02/08/2015 16:30	AMAR382.9.20150802T163046Z.wav_chan0.xml	0
02/08/2015 16:38	AMAR382.9.20150802T163846Z.wav_chan0.xml	0
02/08/2015 16:46	AMAR382.9.20150802T164646Z.wav_chan0.xml	0
02/08/2015 16:54	AMAR382.9.20150802T165446Z.wav_chan0.xml	0
02/08/2015 17:02	AMAR382.9.20150802T170246Z.wav_chan0.xml	0
02/08/2015 17:10	AMAR382.9.20150802T171046Z.wav_chan0.xml	0
02/08/2015 17:18	AMAR382.9.20150802T171846Z.wav_chan0.xml	0
02/08/2015 17:26	AMAR382.9.20150802T172646Z.wav_chan0.xml	0
02/08/2015 17:34	AMAR382.9.20150802T173446Z.wav_chan0.xml	0
02/08/2015 17:42	AMAR382.9.20150802T174246Z.wav_chan0.xml	0
02/08/2015 17:50	AMAR382.9.20150802T175046Z.wav_chan0.xml	0
02/08/2015 17:58	AMAR382.9.20150802T175846Z.wav_chan0.xml	0
02/08/2015 18:06	AMAR382.9.20150802T180646Z.wav_chan0.xml	0
02/08/2015 18:14	AMAR382.9.20150802T181446Z.wav_chan0.xml	0
02/08/2015 18:22	AMAR382.9.20150802T182246Z.wav_chan0.xml	0
02/08/2015 18:30	AMAR382.9.20150802T183046Z.wav_chan0.xml	0
02/08/2015 18:38	AMAR382.9.20150802T183846Z.wav_chan0.xml	0
02/08/2015 18:46	AMAR382.9.20150802T184646Z.wav_chan0.xml	0
02/08/2015 18:54	AMAR382.9.20150802T185446Z.wav_chan0.xml	0
02/08/2015 19:02	AMAR382.9.20150802T190246Z.wav_chan0.xml	0
02/08/2015 19:10	AMAR382.9.20150802T191046Z.wav_chan0.xml	0
02/08/2015 19:18	AMAR382.9.20150802T191846Z.wav_chan0.xml	0
02/08/2015 19:26	AMAR382.9.20150802T192646Z.wav_chan0.xml	0
02/08/2015 19:34	AMAR382.9.20150802T193446Z.wav_chan0.xml	0
02/08/2015 19:42	AMAR382.9.20150802T194246Z.wav_chan0.xml	0
02/08/2015 19:50	AMAR382.9.20150802T195046Z.wav_chan0.xml	0
02/08/2015 19:58	AMAR382.9.20150802T195846Z.wav_chan0.xml	0
02/08/2015 20:06	AMAR382.9.20150802T200646Z.wav_chan0.xml	0
02/08/2015 20:14	AMAR382.9.20150802T201446Z.wav_chan0.xml	0
02/08/2015 20:22	AMAR382.9.20150802T202246Z.wav_chan0.xml	0
02/08/2015 20:30	AMAR382.9.20150802T203046Z.wav_chan0.xml	0
02/08/2015 20:38	AMAR382.9.20150802T203846Z.wav_chan0.xml	0
02/08/2015 20:46	AMAR382.9.20150802T204646Z.wav_chan0.xml	0
02/08/2015 20:54	AMAR382.9.20150802T205446Z.wav_chan0.xml	0
02/08/2015 21:02	AMAR382.9.20150802T210246Z.wav_chan0.xml	0
02/08/2015 21:10	AMAR382.9.20150802T211046Z.wav_chan0.xml	0
02/08/2015 21:18	AMAR382.9.20150802T211846Z.wav_chan0.xml	0
02/08/2015 21:26	AMAR382.9.20150802T212646Z.wav_chan0.xml	0
02/08/2015 21:34	AMAR382.9.20150802T213446Z.wav_chan0.xml	0
02/08/2015 21:42	AMAR382.9.20150802T214246Z.wav_chan0.xml	0
02/08/2015 21:50	AMAR382.9.20150802T215046Z.wav_chan0.xml	0
02/08/2015 21:58	AMAR382.9.20150802T215846Z.wav_chan0.xml	0
02/08/2015 22:06	AMAR382.9.20150802T220646Z.wav_chan0.xml	0
02/08/2015 22:14	AMAR382.9.20150802T221446Z.wav_chan0.xml	0
02/08/2015 22:22	AMAR382.9.20150802T222246Z.wav_chan0.xml	0
02/08/2015 22:30	AMAR382.9.20150802T223046Z.wav_chan0.xml	0
02/08/2015 22:38	AMAR382.9.20150802T223846Z.wav_chan0.xml	0
02/08/2015 22:46	AMAR382.9.20150802T224646Z.wav_chan0.xml	0
02/08/2015 22:54	AMAR382.9.20150802T225446Z.wav_chan0.xml	0
02/08/2015 23:02	AMAR382.9.20150802T230246Z.wav_chan0.xml	0
02/08/2015 23:10	AMAR382.9.20150802T231046Z.wav_chan0.xml	0
02/08/2015 23:18	AMAR382.9.20150802T231846Z.wav_chan0.xml	0
02/08/2015 23:26	AMAR382.9.20150802T232646Z.wav_chan0.xml	0
02/08/2015 23:34	AMAR382.9.20150802T233446Z.wav_chan0.xml	0
02/08/2015 23:42	AMAR382.9.20150802T234246Z.wav_chan0.xml	0
02/08/2015 23:50	AMAR382.9.20150802T235046Z.wav_chan0.xml	0
02/08/2015 23:58	AMAR382.9.20150802T235846Z.wav_chan0.xml	0
02/07/2015 0:06	AMAR382.9.20150702T000646Z.wav_chan0.xml	0
02/07/2015 0:14	AMAR382.9.20150702T001446Z.wav_chan0.xml	0
02/07/2015 0:22	AMAR382.9.20150702T002246Z.wav_chan0.xml	0
02/07/2015 0:30	AMAR382.9.20150702T003046Z.wav_chan0.xml	0
02/07/2015 0:38	AMAR382.9.20150702T003846Z.wav_chan0.xml	0
02/07/2015 0:46	AMAR382.9.20150702T004646Z.wav_chan0.xml	0
02/07/2015 0:54	AMAR382.9.20150702T005446Z.wav_chan0.xml	0
02/07/2015 1:02	AMAR382.9.20150702T010246Z.wav_chan0.xml	0
02/07/2015 1:10	AMAR382.9.20150702T011046Z.wav_chan0.xml	0
02/07/2015 1:18	AMAR382.9.20150702T011846Z.wav_chan0.xml	0
02/07/2015 1:26	AMAR382.9.20150702T012646Z.wav_chan0.xml	0
02/07/2015 1:34	AMAR382.9.20150702T013446Z.wav_chan0.xml	0
02/07/2015 1:42	AMAR382.9.20150702T014246Z.wav_chan0.xml	0
02/07/2015 1:50	AMAR382.9.20150702T015046Z.wav_chan0.xml	0
02/07/2015 1:58	AMAR382.9.20150702T015846Z.wav_chan0.xml	0
02/07/2015 2:06	AMAR382.9.20150702T020646Z.wav_chan0.xml	0
02/07/2015 2:14	AMAR382.9.20150702T021446Z.wav_chan0.xml	0
02/07/2015 2:22	AMAR382.9.20150702T022246Z.wav_chan0.xml	0
02/07/2015 2:30	AMAR382.9.20150702T023046Z.wav_chan0.xml	0
02/07/2015 2:38	AMAR382.9.20150702T023846Z.wav_chan0.xml	0
02/07/2015 2:46	AMAR382.9.20150702T024646Z.wav_chan0.xml	0
02/07/2015 2:54	AMAR382.9.20150702T025446Z.wav_chan0.xml	0
02/07/2015 3:02	AMAR382.9.20150702T030246Z.wav_chan0.xml	0
02/07/2015 3:10	AMAR382.9.20150702T031046Z.wav_chan0.xml	0
02/07/2015 3:18	AMAR382.9.20150702T031846Z.wav_chan0.xml	0
02/07/2015 3:26	AMAR382.9.20150702T032646Z.wav_chan0.xml	0
02/07/2015 3:34	AMAR382.9.20150702T033446Z.wav_chan0.xml	0
02/07/2015 3:42	AMAR382.9.20150702T034246Z.wav_chan0.xml	0
02/07/2015 3:50	AMAR382.9.20150702T035046Z.wav_chan0.xml	0
02/07/2015 3:58	AMAR382.9.20150702T035846Z.wav_chan0.xml	0
02/07/2015 4:06	AMAR382.9.20150702T040646Z.wav_chan0.xml	0
02/07/2015 4:14	AMAR382.9.20150702T041446Z.wav_chan0.xml	0
02/07/2015 4:22	AMAR382.9.20150702T042246Z.wav_chan0.xml	0
02/07/2015 4:30	AMAR382.9.20150702T043046Z.wav_chan0.xml	0
02/07/2015 4:38	AMAR382.9.20150702T043846Z.wav_chan0.xml	0
02/07/2015 4:46	AMAR382.9.20150702T044646Z.wav_chan0.xml	0
02/07/2015 4:54	AMAR382.9.20150702T045446Z.wav_chan0.xml	0
02/07/2015 5:02	AMAR382.9.20150702T050246Z.wav_chan0.xml	0
02/07/2015 5:10	AMAR382.9.20150702T051046Z.wav_chan0.xml	0
02/07/2015 5:18	AMAR382.9.20150702T051846Z.wav_chan0.xml	0
02/07/2015 5:26	AMAR382.9.20150702T052646Z.wav_chan0.xml	0
02/07/2015 5:34	AMAR382.9.20150702T053446Z.wav_chan0.xml	0
02/07/2015 5:42	AMAR382.9.20150702T054246Z.wav_chan0.xml	0
02/07/2015 5:50	AMAR382.9.20150702T055046Z.wav_chan0.xml	0
02/07/2015 5:58	AMAR382.9.20150702T055846Z.wav_chan0.xml	0
02/07/2015 6:06	AMAR382.9.20150702T060646Z.wav_chan0.xml	0
02/07/2015 6:14	AMAR382.9.20150702T061446Z.wav_chan0.xml	0
02/07/2015 6:22	AMAR382.9.20150702T062246Z.wav_chan0.xml	0
02/07/2015 6:30	AMAR382.9.20150702T063046Z.wav_chan0.xml	0
02/07/2015 6:38	AMAR382.9.20150702T063846Z.wav_chan0.xml	0
02/07/2015 6:46	AMAR382.9.20150702T064646Z.wav_chan0.xml	0
02/07/2015 6:54	AMAR382.9.20150702T065446Z.wav_chan0.xml	0
02/07/2015 7:02	AMAR382.9.20150702T070246Z.wav_chan0.xml	0
02/07/2015 7:10	AMAR382.9.20150702T071046Z.wav_chan0.xml	0
02/07/2015 7:18	AMAR382.9.20150702T071846Z.wav_chan0.xml	0
02/07/2015 7:26	AMAR382.9.20150702T072646Z.wav_chan0.xml	0
02/07/2015 7:34	AMAR382.9.20150702T073446Z.wav_chan0.xml	0
02/07/2015 7:42	AMAR382.9.20150702T074246Z.wav_chan0.xml	0
02/07/2015 7:50	AMAR382.9.20150702T075046Z.wav_chan0.xml	0
02/07/2015 7:58	AMAR382.9.20150702T075846Z.wav_chan0.xml	0
02/07/2015 8:06	AMAR382.9.20150702T080646Z.wav_chan0.xml	0
02/07/2015 8:14	AMAR382.9.20150702T081446Z.wav_chan0.xml	0
02/07/2015 8:22	AMAR382.9.20150702T082246Z.wav_chan0.xml	0
02/07/2015 8:30	AMAR382.9.20150702T083046Z.wav_chan0.xml	0
02/07/2015 8:38	AMAR382.9.20150702T083846Z.wav_chan0.xml	0
02/07/2015 8:46	AMAR382.9.20150702T084646Z.wav_chan0.xml	0
02/07/2015 8:54	AMAR382.9.20150702T085446Z.wav_chan0.xml	0
02/07/2015 9:02	AMAR382.9.20150702T090246Z.wav_chan0.xml	0
02/07/2015 9:10	AMAR382.9.20150702T091046Z.wav_chan0.xml	0
02/07/2015 9:18	AMAR382.9.20150702T091846Z.wav_chan0.xml	0
02/07/2015 9:26	AMAR382.9.20150702T092646Z.wav_chan0.xml	0
02/07/2015 9:34	AMAR382.9.20150702T093446Z.wav_chan0.xml	0
02/07/2015 9:42	AMAR382.9.20150702T094246Z.wav_chan0.xml	0
02/07/2015 9:50	AMAR382.9.20150702T095046Z.wav_chan0.xml	0
02/07/2015 9:58	AMAR382.9.20150702T095846Z.wav_chan0.xml	0
02/07/2015 10:06	AMAR382.9.20150702T100646Z.wav_chan0.xml	0
02/07/2015 10:14	AMAR382.9.20150702T101446Z.wav_chan0.xml	0
02/07/2015 10:22	AMAR382.9.20150702T102246Z.wav_chan0.xml	0
02/07/2015 10:30	AMAR382.9.20150702T103046Z.wav_chan0.xml	0
02/07/2015 10:38	AMAR382.9.20150702T103846Z.wav_chan0.xml	0
02/07/2015 10:46	AMAR382.9.20150702T104646Z.wav_chan0.xml	0
02/07/2015 10:54	AMAR382.9.20150702T105446Z.wav_chan0.xml	0
02/07/2015 11:02	AMAR382.9.20150702T110246Z.wav_chan0.xml	0
02/07/2015 11:10	AMAR382.9.20150702T111046Z.wav_chan0.xml	0
02/07/2015 11:18	AMAR382.9.20150702T111846Z.wav_chan0.xml	0
02/07/2015 11:26	AMAR382.9.20150702T112646Z.wav_chan0.xml	0
02/07/2015 11:34	AMAR382.9.20150702T113446Z.wav_chan0.xml	0
02/07/2015 11:42	AMAR382.9.20150702T114246Z.wav_chan0.xml	0
02/07/2015 11:50	AMAR382.9.20150702T115046Z.wav_chan0.xml	0
02/07/2015 11:58	AMAR382.9.20150702T115846Z.wav_chan0.xml	0
02/07/2015 12:06	AMAR382.9.20150702T120646Z.wav_chan0.xml	0
02/07/2015 12:14	AMAR382.9.20150702T121446Z.wav_chan0.xml	0
02/07/2015 12:22	AMAR382.9.20150702T122246Z.wav_chan0.xml	0
02/07/2015 12:30	AMAR382.9.20150702T123046Z.wav_chan0.xml	0
02/07/2015 12:38	AMAR382.9.20150702T123846Z.wav_chan0.xml	0
02/07/2015 12:46	AMAR382.9.20150702T124646Z.wav_chan0.xml	0
02/07/2015 12:54	AMAR382.9.20150702T125446Z.wav_chan0.xml	0
02/07/2015 13:02	AMAR382.9.20150702T130246Z.wav_chan0.xml	0
02/07/2015 13:10	AMAR382.9.20150702T131046Z.wav_chan0.xml	0
02/07/2015 13:18	AMAR382.9.20150702T131846Z.wav_chan0.xml	0
02/07/2015 13:26	AMAR382.9.20150702T132646Z.wav_chan0.xml	0
02/07/2015 13:34	AMAR382.9.20150702T133446Z.wav_chan0.xml	0
02/07/2015 13:42	AMAR382.9.20150702T134246Z.wav_chan0.xml	0
02/07/2015 13:50	AMAR382.9.20150702T135046Z.wav_chan0.xml	0
02/07/2015 13:58	AMAR382.9.20150702T135846Z.wav_chan0.xml	0
02/07/2015 14:06	AMAR382.9.20150702T140646Z.wav_chan0.xml	0
02/07/2015 14:14	AMAR382.9.20150702T141446Z.wav_chan0.xml	0
02/07/2015 14:22	AMAR382.9.20150702T142246Z.wav_chan0.xml	0
02/07/2015 14:30	AMAR382.9.20150702T143046Z.wav_chan0.xml	0
02/07/2015 14:38	AMAR382.9.20150702T143846Z.wav_chan0.xml	0
02/07/2015 14:46	AMAR382.9.20150702T144646Z.wav_chan0.xml	0
02/07/2015 14:54	AMAR382.9.20150702T145446Z.wav_chan0.xml	0
02/07/2015 15:02	AMAR382.9.20150702T150246Z.wav_chan0.xml	0
02/07/2015 15:10	AMAR382.9.20150702T151046Z.wav_chan0.xml	0
02/07/2015 15:18	AMAR382.9.20150702T151846Z.wav_chan0.xml	0
02/07/2015 15:26	AMAR382.9.20150702T152646Z.wav_chan0.xml	0
02/07/2015 15:34	AMAR382.9.20150702T153446Z.wav_chan0.xml	0
02/07/2015 15:42	AMAR382.9.20150702T154246Z.wav_chan0.xml	0
02/07/2015 15:50	AMAR382.9.20150702T155046Z.wav_chan0.xml	0
02/07/2015 15:58	AMAR382.9.20150702T155846Z.wav_chan0.xml	0
02/07/2015 16:06	AMAR382.9.20150702T160646Z.wav_chan0.xml	0
02/07/2015 16:14	AMAR382.9.20150702T161446Z.wav_chan0.xml	0
02/07/2015 16:22	AMAR382.9.20150702T162246Z.wav_chan0.xml	0
02/07/2015 16:30	AMAR382.9.20150702T163046Z.wav_chan0.xml	0
02/07/2015 16:38	AMAR382.9.20150702T163846Z.wav_chan0.xml	0
02/07/2015 16:46	AMAR382.9.20150702T164646Z.wav_chan0.xml	0
02/07/2015 16:54	AMAR382.9.20150702T165446Z.wav_chan0.xml	0
02/07/2015 17:02	AMAR382.9.20150702T170246Z.wav_chan0.xml	0
02/07/2015 17:10	AMAR382.9.20150702T171046Z.wav_chan0.xml	0
02/07/2015 17:18	AMAR382.9.20150702T171846Z.wav_chan0.xml	0
02/07/2015 17:26	AMAR382.9.20150702T172646Z.wav_chan0.xml	0
02/07/2015 17:34	AMAR382.9.20150702T173446Z.wav_chan0.xml	0
02/07/2015 17:42	AMAR382.9.20150702T174246Z.wav_chan0.xml	0
02/07/2015 17:50	AMAR382.9.20150702T175046Z.wav_chan0.xml	0
02/07/2015 17:58	AMAR382.9.20150702T175846Z.wav_chan0.xml	0
02/07/2015 18:06	AMAR382.9.20150702T180646Z.wav_chan0.xml	0
02/07/2015 18:14	AMAR382.9.20150702T181446Z.wav_chan0.xml	0
02/07/2015 18:22	AMAR382.9.20150702T182246Z.wav_chan0.xml	0
02/07/2015 18:30	AMAR382.9.20150702T183046Z.wav_chan0.xml	0
02/07/2015 18:38	AMAR382.9.20150702T183846Z.wav_chan0.xml	0
02/07/2015 18:46	AMAR382.9.20150702T184646Z.wav_chan0.xml	0
02/07/2015 18:54	AMAR382.9.20150702T185446Z.wav_chan0.xml	0
02/07/2015 19:02	AMAR382.9.20150702T190246Z.wav_chan0.xml	0
02/07/2015 19:10	AMAR382.9.20150702T191046Z.wav_chan0.xml	0
02/07/2015 19:18	AMAR382.9.20150702T191846Z.wav_chan0.xml	0
02/07/2015 19:26	AMAR382.9.20150702T192646Z.wav_chan0.xml	0
02/07/2015 19:34	AMAR382.9.20150702T193446Z.wav_chan0.xml	0
02/07/2015 19:42	AMAR382.9.20150702T194246Z.wav_chan0.xml	0
02/07/2015 19:50	AMAR382.9.20150702T195046Z.wav_chan0.xml	0
02/07/2015 19:58	AMAR382.9.20150702T195846Z.wav_chan0.xml	0
02/07/2015 20:06	AMAR382.9.20150702T200646Z.wav_chan0.xml	0
02/07/2015 20:14	AMAR382.9.20150702T201446Z.wav_chan0.xml	0
02/07/2015 20:22	AMAR382.9.20150702T202246Z.wav_chan0.xml	0
02/07/2015 20:30	AMAR382.9.20150702T203046Z.wav_chan0.xml	0
02/07/2015 20:38	AMAR382.9.20150702T203846Z.wav_chan0.xml	0
02/07/2015 20:46	AMAR382.9.20150702T204646Z.wav_chan0.xml	0
02/07/2015 20:54	AMAR382.9.20150702T205446Z.wav_chan0.xml	0
02/07/2015 21:02	AMAR382.9.20150702T210246Z.wav_chan0.xml	0
02/07/2015 21:10	AMAR382.9.20150702T211046Z.wav_chan0.xml	0
02/07/2015 21:18	AMAR382.9.20150702T211846Z.wav_chan0.xml	0
02/07/2015 21:26	AMAR382.9.20150702T212646Z.wav_chan0.xml	0
02/07/2015 21:34	AMAR382.9.20150702T213446Z.wav_chan0.xml	0
02/07/2015 21:42	AMAR382.9.20150702T214246Z.wav_chan0.xml	0
02/07/2015 21:50	AMAR382.9.20150702T215046Z.wav_chan0.xml	0
02/07/2015 21:58	AMAR382.9.20150702T215846Z.wav_chan0.xml	0
02/07/2015 22:06	AMAR382.9.20150702T220646Z.wav_chan0.xml	0
02/07/2015 22:14	AMAR382.9.20150702T221446Z.wav_chan0.xml	0
02/07/2015 22:22	AMAR382.9.20150702T222246Z.wav_chan0.xml	0
02/07/2015 22:30	AMAR382.9.20150702T223046Z.wav_chan0.xml	0
02/07/2015 22:38	AMAR382.9.20150702T223846Z.wav_chan0.xml	0
02/07/2015 22:46	AMAR382.9.20150702T224646Z.wav_chan0.xml	0
02/07/2015 22:54	AMAR382.9.20150702T225446Z.wav_chan0.xml	0
02/07/2015 23:02	AMAR382.9.20150702T230246Z.wav_chan0.xml	0
02/07/2015 23:10	AMAR382.9.20150702T231046Z.wav_chan0.xml	0
02/07/2015 23:18	AMAR382.9.20150702T231846Z.wav_chan0.xml	0
02/07/2015 23:26	AMAR382.9.20150702T232646Z.wav_chan0.xml	0
02/07/2015 23:34	AMAR382.9.20150702T233446Z.wav_chan0.xml	0
02/07/2015 23:42	AMAR382.9.20150702T234246Z.wav_chan0.xml	0
02/07/2015 23:50	AMAR382.9.20150702T235046Z.wav_chan0.xml	0
02/07/2015 23:58	AMAR382.9.20150702T235846Z.wav_chan0.xml	0
02/06/2015 0:06	AMAR382.9.20150602T000646Z.wav_chan0.xml	0
02/06/2015 0:14	AMAR382.9.20150602T001446Z.wav_chan0.xml	0
02/06/2015 0:22	AMAR382.9.20150602T002246Z.wav_chan0.xml	0
02/06/2015 0:30	AMAR382.9.20150602T003046Z.wav_chan0.xml	0
02/06/2015 0:38	AMAR382.9.20150602T003846Z.wav_chan0.xml	0
02/06/2015 0:46	AMAR382.9.20150602T004646Z.wav_chan0.xml	0
02/06/2015 0:54	AMAR382.9.20150602T005446Z.wav_chan0.xml	0
02/06/2015 1:02	AMAR382.9.20150602T010246Z.wav_chan0.xml	0
02/06/2015 1:10	AMAR382.9.20150602T011046Z.wav_chan0.xml	0
02/06/2015 1:18	AMAR382.9.20150602T011846Z.wav_chan0.xml	0
02/06/2015 1:26	AMAR382.9.20150602T012646Z.wav_chan0.xml	0
02/06/2015 1:34	AMAR382.9.20150602T013446Z.wav_chan0.xml	0
02/06/2015 1:42	AMAR382.9.20150602T014246Z.wav_chan0.xml	0
02/06/2015 1:50	AMAR382.9.20150602T015046Z.wav_chan0.xml	0
02/06/2015 1:58	AMAR382.9.20150602T015846Z.wav_chan0.xml	0
02/06/2015 2:06	AMAR382.9.20150602T020646Z.wav_chan0.xml	0
02/06/2015 2:14	AMAR382.9.20150602T021446Z.wav_chan0.xml	0
02/06/2015 2:22	AMAR382.9.20150602T022246Z.wav_chan0.xml	0
02/06/2015 2:30	AMAR382.9.20150602T023046Z.wav_chan0.xml	0
02/06/2015 2:38	AMAR382.9.20150602T023846Z.wav_chan0.xml	0
02/06/2015 2:46	AMAR382.9.20150602T024646Z.wav_chan0.xml	0
02/06/2015 2:54	AMAR382.9.20150602T025446Z.wav_chan0.xml	0
02/06/2015 3:02	AMAR382.9.20150602T030246Z.wav_chan0.xml	0
02/06/2015 3:10	AMAR382.9.20150602T031046Z.wav_chan0.xml	0
02/06/2015 3:18	AMAR382.9.20150602T031846Z.wav_chan0.xml	0
02/06/2015 3:26	AMAR382.9.20150602T032646Z.wav_chan0.xml	0
02/06/2015 3:34	AMAR382.9.20150602T033446Z.wav_chan0.xml	0
02/06/2015 3:42	AMAR382.9.20150602T034246Z.wav_chan0.xml	0
02/06/2015 3:50	AMAR382.9.20150602T035046Z.wav_chan0.xml	0
02/06/2015 3:58	AMAR382.9.20150602T035846Z.wav_chan0.xml	0
02/06/2015 4:06	AMAR382.9.20150602T040646Z.wav_chan0.xml	0
02/06/2015 4:14	AMAR382.9.20150602T041446Z.wav_chan0.xml	0
02/06/2015 4:22	AMAR382.9.20150602T042246Z.wav_chan0.xml	0
02/06/2015 4:30	AMAR382.9.20150602T043046Z.wav_chan0.xml	0
02/06/2015 4:38	AMAR382.9.20150602T043846Z.wav_chan0.xml	0
02/06/2015 4:46	AMAR382.9.20150602T044646Z.wav_chan0.xml	0
02/06/2015 4:54	AMAR382.9.20150602T045446Z.wav_chan0.xml	0
02/06/2015 5:02	AMAR382.9.20150602T050246Z.wav_chan0.xml	0
02/06/2015 5:10	AMAR382.9.20150602T051046Z.wav_chan0.xml	0
02/06/2015 5:18	AMAR382.9.20150602T051846Z.wav_chan0.xml	0
02/06/2015 5:26	AMAR382.9.20150602T052646Z.wav_chan0.xml	0
02/06/2015 5:34	AMAR382.9.20150602T053446Z.wav_chan0.xml	0
02/06/2015 5:42	AMAR382.9.20150602T054246Z.wav_chan0.xml	0
02/06/2015 5:50	AMAR382.9.20150602T055046Z.wav_chan0.xml	0
02/06/2015 5:58	AMAR382.9.20150602T055846Z.wav_chan0.xml	0
02/06/2015 6:06	AMAR382.9.20150602T060646Z.wav_chan0.xml	0
02/06/2015 6:14	AMAR382.9.20150602T061446Z.wav_chan0.xml	0
02/06/2015 6:22	AMAR382.9.20150602T062246Z.wav_chan0.xml	0
02/06/2015 6:30	AMAR382.9.20150602T063046Z.wav_chan0.xml	0
02/06/2015 6:38	AMAR382.9.20150602T063846Z.wav_chan0.xml	0
02/06/2015 6:46	AMAR382.9.20150602T064646Z.wav_chan0.xml	0
02/06/2015 6:54	AMAR382.9.20150602T065446Z.wav_chan0.xml	0
02/06/2015 7:02	AMAR382.9.20150602T070246Z.wav_chan0.xml	0
02/06/2015 7:10	AMAR382.9.20150602T071046Z.wav_chan0.xml	0
02/06/2015 7:18	AMAR382.9.20150602T071846Z.wav_chan0.xml	0
02/06/2015 7:26	AMAR382.9.20150602T072646Z.wav_chan0.xml	0
02/06/2015 7:34	AMAR382.9.20150602T073446Z.wav_chan0.xml	0
02/06/2015 7:42	AMAR382.9.20150602T074246Z.wav_chan0.xml	0
02/06/2015 7:50	AMAR382.9.20150602T075046Z.wav_chan0.xml	0
02/06/2015 7:58	AMAR382.9.20150602T075846Z.wav_chan0.xml	0
02/06/2015 8:06	AMAR382.9.20150602T080646Z.wav_chan0.xml	0
02/06/2015 8:14	AMAR382.9.20150602T081446Z.wav_chan0.xml	0
02/06/2015 8:22	AMAR382.9.20150602T082246Z.wav_chan0.xml	0
02/06/2015 8:30	AMAR382.9.20150602T083046Z.wav_chan0.xml	0
02/06/2015 8:38	AMAR382.9.20150602T083846Z.wav_chan0.xml	0
02/06/2015 8:46	AMAR382.9.20150602T084646Z.wav_chan0.xml	0
02/06/2015 8:54	AMAR382.9.20150602T085446Z.wav_chan0.xml	0
02/06/2015 9:02	AMAR382.9.20150602T090246Z.wav_chan0.xml	0
02/06/2015 9:10	AMAR382.9.20150602T091046Z.wav_chan0.xml	0
02/06/2015 9:18	AMAR382.9.20150602T091846Z.wav_chan0.xml	0
02/06/2015 9:26	AMAR382.9.20150602T092646Z.wav_chan0.xml	0
02/06/2015 9:34	AMAR382.9.20150602T093446Z.wav_chan0.xml	3
02/06/2015 9:42	AMAR382.9.20150602T094246Z.wav_chan0.xml	0
02/06/2015 9:50	AMAR382.9.20150602T095046Z.wav_chan0.xml	0
02/06/2015 9:58	AMAR382.9.20150602T095846Z.wav_chan0.xml	0
02/06/2015 10:06	AMAR382.9.20150602T100646Z.wav_chan0.xml	0
02/06/2015 10:14	AMAR382.9.20150602T101446Z.wav_chan0.xml	0
02/06/2015 10:22	AMAR382.9.20150602T102246Z.wav_chan0.xml	0
02/06/2015 10:30	AMAR382.9.20150602T103046Z.wav_chan0.xml	0
02/06/2015 10:38	AMAR382.9.20150602T103846Z.wav_chan0.xml	0
02/06/2015 10:46	AMAR382.9.20150602T104646Z.wav_chan0.xml	0
02/06/2015 10:54	AMAR382.9.20150602T105446Z.wav_chan0.xml	0
02/06/2015 11:02	AMAR382.9.20150602T110246Z.wav_chan0.xml	0
02/06/2015 11:10	AMAR382.9.20150602T111046Z.wav_chan0.xml	0
02/06/2015 11:18	AMAR382.9.20150602T111846Z.wav_chan0.xml	0
02/06/2015 11:26	AMAR382.9.20150602T112646Z.wav_chan0.xml	0
02/06/2015 11:34	AMAR382.9.20150602T113446Z.wav_chan0.xml	0
02/06/2015 11:42	AMAR382.9.20150602T114246Z.wav_chan0.xml	0
02/06/2015 11:50	AMAR382.9.20150602T115046Z.wav_chan0.xml	0
02/06/2015 11:58	AMAR382.9.20150602T115846Z.wav_chan0.xml	0
02/06/2015 12:06	AMAR382.9.20150602T120646Z.wav_chan0.xml	0
02/06/2015 12:14	AMAR382.9.20150602T121446Z.wav_chan0.xml	0
02/06/2015 12:22	AMAR382.9.20150602T122246Z.wav_chan0.xml	0
02/06/2015 12:30	AMAR382.9.20150602T123046Z.wav_chan0.xml	0
02/06/2015 12:38	AMAR382.9.20150602T123846Z.wav_chan0.xml	0
02/06/2015 12:46	AMAR382.9.20150602T124646Z.wav_chan0.xml	0
02/06/2015 12:54	AMAR382.9.20150602T125446Z.wav_chan0.xml	0
02/06/2015 13:02	AMAR382.9.20150602T130246Z.wav_chan0.xml	0
02/06/2015 13:10	AMAR382.9.20150602T131046Z.wav_chan0.xml	0
02/06/2015 13:18	AMAR382.9.20150602T131846Z.wav_chan0.xml	0
02/06/2015 13:26	AMAR382.9.20150602T132646Z.wav_chan0.xml	0
02/06/2015 13:34	AMAR382.9.20150602T133446Z.wav_chan0.xml	4
02/06/2015 13:42	AMAR382.9.20150602T134246Z.wav_chan0.xml	0
02/06/2015 13:50	AMAR382.9.20150602T135046Z.wav_chan0.xml	0
02/06/2015 13:58	AMAR382.9.20150602T135846Z.wav_chan0.xml	0
02/06/2015 14:06	AMAR382.9.20150602T140646Z.wav_chan0.xml	0
02/06/2015 14:14	AMAR382.9.20150602T141446Z.wav_chan0.xml	0
02/06/2015 14:22	AMAR382.9.20150602T142246Z.wav_chan0.xml	0
02/06/2015 14:30	AMAR382.9.20150602T143046Z.wav_chan0.xml	0
02/06/2015 14:38	AMAR382.9.20150602T143846Z.wav_chan0.xml	0
02/06/2015 14:46	AMAR382.9.20150602T144646Z.wav_chan0.xml	0
02/06/2015 14:54	AMAR382.9.20150602T145446Z.wav_chan0.xml	0
02/06/2015 15:02	AMAR382.9.20150602T150246Z.wav_chan0.xml	0
02/06/2015 15:10	AMAR382.9.20150602T151046Z.wav_chan0.xml	0
02/06/2015 15:18	AMAR382.9.20150602T151846Z.wav_chan0.xml	0
02/06/2015 15:26	AMAR382.9.20150602T152646Z.wav_chan0.xml	0
02/06/2015 15:34	AMAR382.9.20150602T153446Z.wav_chan0.xml	0
02/06/2015 15:42	AMAR382.9.20150602T154246Z.wav_chan0.xml	0
02/06/2015 15:50	AMAR382.9.20150602T155046Z.wav_chan0.xml	0
02/06/2015 15:58	AMAR382.9.20150602T155846Z.wav_chan0.xml	0
02/06/2015 16:06	AMAR382.9.20150602T160646Z.wav_chan0.xml	0
02/06/2015 16:14	AMAR382.9.20150602T161446Z.wav_chan0.xml	0
02/06/2015 16:22	AMAR382.9.20150602T162246Z.wav_chan0.xml	0
02/06/2015 16:30	AMAR382.9.20150602T163046Z.wav_chan0.xml	0
02/06/2015 16:38	AMAR382.9.20150602T163846Z.wav_chan0.xml	0
02/06/2015 16:46	AMAR382.9.20150602T164646Z.wav_chan0.xml	0
02/06/2015 16:54	AMAR382.9.20150602T165446Z.wav_chan0.xml	0
02/06/2015 17:02	AMAR382.9.20150602T170246Z.wav_chan0.xml	0
02/06/2015 17:10	AMAR382.9.20150602T171046Z.wav_chan0.xml	0
02/06/2015 17:18	AMAR382.9.20150602T171846Z.wav_chan0.xml	0
02/06/2015 17:26	AMAR382.9.20150602T172646Z.wav_chan0.xml	0
02/06/2015 17:34	AMAR382.9.20150602T173446Z.wav_chan0.xml	0
02/06/2015 17:42	AMAR382.9.20150602T174246Z.wav_chan0.xml	0
02/06/2015 17:50	AMAR382.9.20150602T175046Z.wav_chan0.xml	0
02/06/2015 17:58	AMAR382.9.20150602T175846Z.wav_chan0.xml	1
02/06/2015 18:06	AMAR382.9.20150602T180646Z.wav_chan0.xml	4
02/06/2015 18:14	AMAR382.9.20150602T181446Z.wav_chan0.xml	0
02/06/2015 18:22	AMAR382.9.20150602T182246Z.wav_chan0.xml	0
02/06/2015 18:30	AMAR382.9.20150602T183046Z.wav_chan0.xml	0
02/06/2015 18:38	AMAR382.9.20150602T183846Z.wav_chan0.xml	0
02/06/2015 18:46	AMAR382.9.20150602T184646Z.wav_chan0.xml	0
02/06/2015 18:54	AMAR382.9.20150602T185446Z.wav_chan0.xml	0
02/06/2015 19:02	AMAR382.9.20150602T190246Z.wav_chan0.xml	0
02/06/2015 19:10	AMAR382.9.20150602T191046Z.wav_chan0.xml	0
02/06/2015 19:18	AMAR382.9.20150602T191846Z.wav_chan0.xml	0
02/06/2015 19:26	AMAR382.9.20150602T192646Z.wav_chan0.xml	0
02/06/2015 19:34	AMAR382.9.20150602T193446Z.wav_chan0.xml	0
02/06/2015 19:42	AMAR382.9.20150602T194246Z.wav_chan0.xml	0
02/06/2015 19:50	AMAR382.9.20150602T195046Z.wav_chan0.xml	0
02/06/2015 19:58	AMAR382.9.20150602T195846Z.wav_chan0.xml	0
02/06/2015 20:06	AMAR382.9.20150602T200646Z.wav_chan0.xml	0
02/06/2015 20:14	AMAR382.9.20150602T201446Z.wav_chan0.xml	0
02/06/2015 20:22	AMAR382.9.20150602T202246Z.wav_chan0.xml	0
02/06/2015 20:30	AMAR382.9.20150602T203046Z.wav_chan0.xml	0
02/06/2015 20:38	AMAR382.9.20150602T203846Z.wav_chan0.xml	0
02/06/2015 20:46	AMAR382.9.20150602T204646Z.wav_chan0.xml	0
02/06/2015 20:54	AMAR382.9.20150602T205446Z.wav_chan0.xml	0
02/06/2015 21:02	AMAR382.9.20150602T210246Z.wav_chan0.xml	0
02/06/2015 21:10	AMAR382.9.20150602T211046Z.wav_chan0.xml	0
02/06/2015 21:18	AMAR382.9.20150602T211846Z.wav_chan0.xml	0
02/06/2015 21:26	AMAR382.9.20150602T212646Z.wav_chan0.xml	0
02/06/2015 21:34	AMAR382.9.20150602T213446Z.wav_chan0.xml	0
02/06/2015 21:42	AMAR382.9.20150602T214246Z.wav_chan0.xml	0
02/06/2015 21:50	AMAR382.9.20150602T215046Z.wav_chan0.xml	0
02/06/2015 21:58	AMAR382.9.20150602T215846Z.wav_chan0.xml	0
02/06/2015 22:06	AMAR382.9.20150602T220646Z.wav_chan0.xml	0
02/06/2015 22:14	AMAR382.9.20150602T221446Z.wav_chan0.xml	0
02/06/2015 22:22	AMAR382.9.20150602T222246Z.wav_chan0.xml	0
02/06/2015 22:30	AMAR382.9.20150602T223046Z.wav_chan0.xml	0
02/06/2015 22:38	AMAR382.9.20150602T223846Z.wav_chan0.xml	0
02/06/2015 22:46	AMAR382.9.20150602T224646Z.wav_chan0.xml	0
02/06/2015 22:54	AMAR382.9.20150602T225446Z.wav_chan0.xml	0
02/06/2015 23:02	AMAR382.9.20150602T230246Z.wav_chan0.xml	0
02/06/2015 23:10	AMAR382.9.20150602T231046Z.wav_chan0.xml	0
02/06/2015 23:18	AMAR382.9.20150602T231846Z.wav_chan0.xml	0
02/06/2015 23:26	AMAR382.9.20150602T232646Z.wav_chan0.xml	0
02/06/2015 23:34	AMAR382.9.20150602T233446Z.wav_chan0.xml	0
02/06/2015 23:42	AMAR382.9.20150602T234246Z.wav_chan0.xml	0
02/06/2015 23:50	AMAR382.9.20150602T235046Z.wav_chan0.xml	0
02/06/2015 23:58	AMAR382.9.20150602T235846Z.wav_chan0.xml	0
03/08/2015 0:06	AMAR382.9.20150803T000646Z.wav_chan0.xml	0
03/08/2015 0:14	AMAR382.9.20150803T001446Z.wav_chan0.xml	0
03/08/2015 0:22	AMAR382.9.20150803T002246Z.wav_chan0.xml	0
03/08/2015 0:30	AMAR382.9.20150803T003046Z.wav_chan0.xml	0
03/08/2015 0:38	AMAR382.9.20150803T003846Z.wav_chan0.xml	0
03/08/2015 0:46	AMAR382.9.20150803T004646Z.wav_chan0.xml	0
03/08/2015 0:54	AMAR382.9.20150803T005446Z.wav_chan0.xml	0
03/08/2015 1:02	AMAR382.9.20150803T010246Z.wav_chan0.xml	0
03/08/2015 1:10	AMAR382.9.20150803T011046Z.wav_chan0.xml	0
03/08/2015 1:18	AMAR382.9.20150803T011846Z.wav_chan0.xml	0
03/08/2015 1:26	AMAR382.9.20150803T012646Z.wav_chan0.xml	0
03/08/2015 1:34	AMAR382.9.20150803T013446Z.wav_chan0.xml	0
03/08/2015 1:42	AMAR382.9.20150803T014246Z.wav_chan0.xml	0
03/08/2015 1:50	AMAR382.9.20150803T015046Z.wav_chan0.xml	0
03/08/2015 1:58	AMAR382.9.20150803T015846Z.wav_chan0.xml	0
03/08/2015 2:06	AMAR382.9.20150803T020646Z.wav_chan0.xml	0
03/08/2015 2:14	AMAR382.9.20150803T021446Z.wav_chan0.xml	0
03/08/2015 2:22	AMAR382.9.20150803T022246Z.wav_chan0.xml	0
03/08/2015 2:30	AMAR382.9.20150803T023046Z.wav_chan0.xml	0
03/08/2015 2:38	AMAR382.9.20150803T023846Z.wav_chan0.xml	0
03/08/2015 2:46	AMAR382.9.20150803T024646Z.wav_chan0.xml	0
03/08/2015 2:54	AMAR382.9.20150803T025446Z.wav_chan0.xml	0
03/08/2015 3:02	AMAR382.9.20150803T030246Z.wav_chan0.xml	0
03/08/2015 3:10	AMAR382.9.20150803T031046Z.wav_chan0.xml	0
03/08/2015 3:18	AMAR382.9.20150803T031846Z.wav_chan0.xml	0
03/08/2015 3:26	AMAR382.9.20150803T032646Z.wav_chan0.xml	0
03/08/2015 3:34	AMAR382.9.20150803T033446Z.wav_chan0.xml	0
03/08/2015 3:42	AMAR382.9.20150803T034246Z.wav_chan0.xml	0
03/08/2015 3:50	AMAR382.9.20150803T035046Z.wav_chan0.xml	0
03/08/2015 3:58	AMAR382.9.20150803T035846Z.wav_chan0.xml	0
03/08/2015 4:06	AMAR382.9.20150803T040646Z.wav_chan0.xml	0
03/08/2015 4:14	AMAR382.9.20150803T041446Z.wav_chan0.xml	0
03/08/2015 4:22	AMAR382.9.20150803T042246Z.wav_chan0.xml	0
03/08/2015 4:30	AMAR382.9.20150803T043046Z.wav_chan0.xml	0
03/08/2015 4:38	AMAR382.9.20150803T043846Z.wav_chan0.xml	0
03/08/2015 4:46	AMAR382.9.20150803T044646Z.wav_chan0.xml	0
03/08/2015 4:54	AMAR382.9.20150803T045446Z.wav_chan0.xml	0
03/08/2015 5:02	AMAR382.9.20150803T050246Z.wav_chan0.xml	0
03/08/2015 5:10	AMAR382.9.20150803T051046Z.wav_chan0.xml	0
03/08/2015 5:18	AMAR382.9.20150803T051846Z.wav_chan0.xml	0
03/08/2015 5:26	AMAR382.9.20150803T052646Z.wav_chan0.xml	0
03/08/2015 5:34	AMAR382.9.20150803T053446Z.wav_chan0.xml	0
03/08/2015 5:42	AMAR382.9.20150803T054246Z.wav_chan0.xml	0
03/08/2015 5:50	AMAR382.9.20150803T055046Z.wav_chan0.xml	0
03/08/2015 5:58	AMAR382.9.20150803T055846Z.wav_chan0.xml	0
03/08/2015 6:06	AMAR382.9.20150803T060646Z.wav_chan0.xml	0
03/08/2015 6:14	AMAR382.9.20150803T061446Z.wav_chan0.xml	0
03/08/2015 6:22	AMAR382.9.20150803T062246Z.wav_chan0.xml	0
03/08/2015 6:30	AMAR382.9.20150803T063046Z.wav_chan0.xml	0
03/08/2015 6:38	AMAR382.9.20150803T063846Z.wav_chan0.xml	0
03/08/2015 6:46	AMAR382.9.20150803T064646Z.wav_chan0.xml	0
03/08/2015 6:54	AMAR382.9.20150803T065446Z.wav_chan0.xml	0
03/08/2015 7:02	AMAR382.9.20150803T070246Z.wav_chan0.xml	0
03/08/2015 7:10	AMAR382.9.20150803T071046Z.wav_chan0.xml	0
03/08/2015 7:18	AMAR382.9.20150803T071846Z.wav_chan0.xml	0
03/08/2015 7:26	AMAR382.9.20150803T072646Z.wav_chan0.xml	0
03/08/2015 7:34	AMAR382.9.20150803T073446Z.wav_chan0.xml	0
03/08/2015 7:42	AMAR382.9.20150803T074246Z.wav_chan0.xml	0
03/08/2015 7:50	AMAR382.9.20150803T075046Z.wav_chan0.xml	0
03/08/2015 7:58	AMAR382.9.20150803T075846Z.wav_chan0.xml	0
03/08/2015 8:06	AMAR382.9.20150803T080646Z.wav_chan0.xml	0
03/08/2015 8:14	AMAR382.9.20150803T081446Z.wav_chan0.xml	0
03/08/2015 8:22	AMAR382.9.20150803T082246Z.wav_chan0.xml	0
03/08/2015 8:30	AMAR382.9.20150803T083046Z.wav_chan0.xml	0
03/08/2015 8:38	AMAR382.9.20150803T083846Z.wav_chan0.xml	0
03/08/2015 8:46	AMAR382.9.20150803T084646Z.wav_chan0.xml	0
03/08/2015 8:54	AMAR382.9.20150803T085446Z.wav_chan0.xml	0
03/08/2015 9:02	AMAR382.9.20150803T090246Z.wav_chan0.xml	0
03/08/2015 9:10	AMAR382.9.20150803T091046Z.wav_chan0.xml	0
03/08/2015 9:18	AMAR382.9.20150803T091846Z.wav_chan0.xml	0
03/08/2015 9:26	AMAR382.9.20150803T092646Z.wav_chan0.xml	0
03/08/2015 9:34	AMAR382.9.20150803T093446Z.wav_chan0.xml	0
03/08/2015 9:42	AMAR382.9.20150803T094246Z.wav_chan0.xml	0
03/08/2015 9:50	AMAR382.9.20150803T095046Z.wav_chan0.xml	0
03/08/2015 9:58	AMAR382.9.20150803T095846Z.wav_chan0.xml	0
03/08/2015 10:06	AMAR382.9.20150803T100646Z.wav_chan0.xml	0
03/08/2015 10:14	AMAR382.9.20150803T101446Z.wav_chan0.xml	0
03/08/2015 10:22	AMAR382.9.20150803T102246Z.wav_chan0.xml	0
03/08/2015 10:30	AMAR382.9.20150803T103046Z.wav_chan0.xml	0
03/08/2015 10:38	AMAR382.9.20150803T103846Z.wav_chan0.xml	0
03/08/2015 10:46	AMAR382.9.20150803T104646Z.wav_chan0.xml	0
03/08/2015 10:54	AMAR382.9.20150803T105446Z.wav_chan0.xml	0
03/08/2015 11:02	AMAR382.9.20150803T110246Z.wav_chan0.xml	0
03/08/2015 11:10	AMAR382.9.20150803T111046Z.wav_chan0.xml	0
03/08/2015 11:18	AMAR382.9.20150803T111846Z.wav_chan0.xml	0
03/08/2015 11:26	AMAR382.9.20150803T112646Z.wav_chan0.xml	0
03/08/2015 11:34	AMAR382.9.20150803T113446Z.wav_chan0.xml	0
03/08/2015 11:42	AMAR382.9.20150803T114246Z.wav_chan0.xml	0
03/08/2015 11:50	AMAR382.9.20150803T115046Z.wav_chan0.xml	0
03/08/2015 11:58	AMAR382.9.20150803T115846Z.wav_chan0.xml	0
03/08/2015 12:06	AMAR382.9.20150803T120646Z.wav_chan0.xml	0
03/08/2015 12:14	AMAR382.9.20150803T121446Z.wav_chan0.xml	0
03/08/2015 12:22	AMAR382.9.20150803T122246Z.wav_chan0.xml	0
03/08/2015 12:30	AMAR382.9.20150803T123046Z.wav_chan0.xml	0
03/08/2015 12:38	AMAR382.9.20150803T123846Z.wav_chan0.xml	0
03/08/2015 12:46	AMAR382.9.20150803T124646Z.wav_chan0.xml	0
03/08/2015 12:54	AMAR382.9.20150803T125446Z.wav_chan0.xml	0
03/08/2015 13:02	AMAR382.9.20150803T130246Z.wav_chan0.xml	0
03/08/2015 13:10	AMAR382.9.20150803T131046Z.wav_chan0.xml	0
03/08/2015 13:18	AMAR382.9.20150803T131846Z.wav_chan0.xml	0
03/08/2015 13:26	AMAR382.9.20150803T132646Z.wav_chan0.xml	0
03/08/2015 13:34	AMAR382.9.20150803T133446Z.wav_chan0.xml	0
03/08/2015 13:42	AMAR382.9.20150803T134246Z.wav_chan0.xml	0
03/08/2015 13:50	AMAR382.9.20150803T135046Z.wav_chan0.xml	0
03/08/2015 13:58	AMAR382.9.20150803T135846Z.wav_chan0.xml	0
03/08/2015 14:06	AMAR382.9.20150803T140646Z.wav_chan0.xml	0
03/08/2015 14:14	AMAR382.9.20150803T141446Z.wav_chan0.xml	0
03/08/2015 14:22	AMAR382.9.20150803T142246Z.wav_chan0.xml	0
03/08/2015 14:30	AMAR382.9.20150803T143046Z.wav_chan0.xml	0
03/08/2015 14:38	AMAR382.9.20150803T143846Z.wav_chan0.xml	0
03/08/2015 14:46	AMAR382.9.20150803T144646Z.wav_chan0.xml	0
03/08/2015 14:54	AMAR382.9.20150803T145446Z.wav_chan0.xml	0
03/08/2015 15:02	AMAR382.9.20150803T150246Z.wav_chan0.xml	0
03/08/2015 15:10	AMAR382.9.20150803T151046Z.wav_chan0.xml	0
03/08/2015 15:18	AMAR382.9.20150803T151846Z.wav_chan0.xml	0
03/08/2015 15:26	AMAR382.9.20150803T152646Z.wav_chan0.xml	0
03/08/2015 15:34	AMAR382.9.20150803T153446Z.wav_chan0.xml	0
03/08/2015 15:42	AMAR382.9.20150803T154246Z.wav_chan0.xml	0
03/08/2015 15:50	AMAR382.9.20150803T155046Z.wav_chan0.xml	0
03/08/2015 15:58	AMAR382.9.20150803T155846Z.wav_chan0.xml	0
03/08/2015 16:06	AMAR382.9.20150803T160646Z.wav_chan0.xml	0
03/08/2015 16:14	AMAR382.9.20150803T161446Z.wav_chan0.xml	0
03/08/2015 16:22	AMAR382.9.20150803T162246Z.wav_chan0.xml	0
03/08/2015 16:30	AMAR382.9.20150803T163046Z.wav_chan0.xml	0
03/08/2015 16:38	AMAR382.9.20150803T163846Z.wav_chan0.xml	0
03/08/2015 16:46	AMAR382.9.20150803T164646Z.wav_chan0.xml	0
03/08/2015 16:54	AMAR382.9.20150803T165446Z.wav_chan0.xml	0
03/08/2015 17:02	AMAR382.9.20150803T170246Z.wav_chan0.xml	0
03/08/2015 17:10	AMAR382.9.20150803T171046Z.wav_chan0.xml	0
03/08/2015 17:18	AMAR382.9.20150803T171846Z.wav_chan0.xml	0
03/08/2015 17:26	AMAR382.9.20150803T172646Z.wav_chan0.xml	0
03/08/2015 17:34	AMAR382.9.20150803T173446Z.wav_chan0.xml	0
03/08/2015 17:42	AMAR382.9.20150803T174246Z.wav_chan0.xml	0
03/08/2015 17:50	AMAR382.9.20150803T175046Z.wav_chan0.xml	0
03/08/2015 17:58	AMAR382.9.20150803T175846Z.wav_chan0.xml	0
03/08/2015 18:06	AMAR382.9.20150803T180646Z.wav_chan0.xml	0
03/08/2015 18:14	AMAR382.9.20150803T181446Z.wav_chan0.xml	0
03/08/2015 18:22	AMAR382.9.20150803T182246Z.wav_chan0.xml	0
03/08/2015 18:30	AMAR382.9.20150803T183046Z.wav_chan0.xml	0
03/08/2015 18:38	AMAR382.9.20150803T183846Z.wav_chan0.xml	0
03/08/2015 18:46	AMAR382.9.20150803T184646Z.wav_chan0.xml	0
03/08/2015 18:54	AMAR382.9.20150803T185446Z.wav_chan0.xml	0
03/08/2015 19:02	AMAR382.9.20150803T190246Z.wav_chan0.xml	0
03/08/2015 19:10	AMAR382.9.20150803T191046Z.wav_chan0.xml	0
03/08/2015 19:18	AMAR382.9.20150803T191846Z.wav_chan0.xml	0
03/08/2015 19:26	AMAR382.9.20150803T192646Z.wav_chan0.xml	0
03/08/2015 19:34	AMAR382.9.20150803T193446Z.wav_chan0.xml	0
03/08/2015 19:42	AMAR382.9.20150803T194246Z.wav_chan0.xml	0
03/08/2015 19:50	AMAR382.9.20150803T195046Z.wav_chan0.xml	0
03/08/2015 19:58	AMAR382.9.20150803T195846Z.wav_chan0.xml	0
03/08/2015 20:06	AMAR382.9.20150803T200646Z.wav_chan0.xml	0
03/08/2015 20:14	AMAR382.9.20150803T201446Z.wav_chan0.xml	0
03/08/2015 20:22	AMAR382.9.20150803T202246Z.wav_chan0.xml	0
03/08/2015 20:30	AMAR382.9.20150803T203046Z.wav_chan0.xml	0
03/08/2015 20:38	AMAR382.9.20150803T203846Z.wav_chan0.xml	0
03/08/2015 20:46	AMAR382.9.20150803T204646Z.wav_chan0.xml	0
03/08/2015 20:54	AMAR382.9.20150803T205446Z.wav_chan0.xml	0
03/08/2015 21:02	AMAR382.9.20150803T210246Z.wav_chan0.xml	0
03/08/2015 21:10	AMAR382.9.20150803T211046Z.wav_chan0.xml	0
03/08/2015 21:18	AMAR382.9.20150803T211846Z.wav_chan0.xml	0
03/08/2015 21:26	AMAR382.9.20150803T212646Z.wav_chan0.xml	0
03/08/2015 21:34	AMAR382.9.20150803T213446Z.wav_chan0.xml	0
03/08/2015 21:42	AMAR382.9.20150803T214246Z.wav_chan0.xml	0
03/08/2015 21:50	AMAR382.9.20150803T215046Z.wav_chan0.xml	0
03/08/2015 21:58	AMAR382.9.20150803T215846Z.wav_chan0.xml	0
03/08/2015 22:06	AMAR382.9.20150803T220646Z.wav_chan0.xml	0
03/08/2015 22:14	AMAR382.9.20150803T221446Z.wav_chan0.xml	0
03/08/2015 22:22	AMAR382.9.20150803T222246Z.wav_chan0.xml	0
03/08/2015 22:30	AMAR382.9.20150803T223046Z.wav_chan0.xml	0
03/08/2015 22:38	AMAR382.9.20150803T223846Z.wav_chan0.xml	0
03/08/2015 22:46	AMAR382.9.20150803T224646Z.wav_chan0.xml	0
03/08/2015 22:54	AMAR382.9.20150803T225446Z.wav_chan0.xml	0
03/08/2015 23:02	AMAR382.9.20150803T230246Z.wav_chan0.xml	0
03/08/2015 23:10	AMAR382.9.20150803T231046Z.wav_chan0.xml	0
03/08/2015 23:18	AMAR382.9.20150803T231846Z.wav_chan0.xml	0
03/08/2015 23:26	AMAR382.9.20150803T232646Z.wav_chan0.xml	0
03/08/2015 23:34	AMAR382.9.20150803T233446Z.wav_chan0.xml	0
03/08/2015 23:42	AMAR382.9.20150803T234246Z.wav_chan0.xml	0
03/08/2015 23:50	AMAR382.9.20150803T235046Z.wav_chan0.xml	0
03/08/2015 23:58	AMAR382.9.20150803T235846Z.wav_chan0.xml	0
03/07/2015 0:06	AMAR382.9.20150703T000646Z.wav_chan0.xml	0
03/07/2015 0:14	AMAR382.9.20150703T001446Z.wav_chan0.xml	0
03/07/2015 0:22	AMAR382.9.20150703T002246Z.wav_chan0.xml	0
03/07/2015 0:30	AMAR382.9.20150703T003046Z.wav_chan0.xml	0
03/07/2015 0:38	AMAR382.9.20150703T003846Z.wav_chan0.xml	0
03/07/2015 0:46	AMAR382.9.20150703T004646Z.wav_chan0.xml	0
03/07/2015 0:54	AMAR382.9.20150703T005446Z.wav_chan0.xml	0
03/07/2015 1:02	AMAR382.9.20150703T010246Z.wav_chan0.xml	0
03/07/2015 1:10	AMAR382.9.20150703T011046Z.wav_chan0.xml	0
03/07/2015 1:18	AMAR382.9.20150703T011846Z.wav_chan0.xml	0
03/07/2015 1:26	AMAR382.9.20150703T012646Z.wav_chan0.xml	0
03/07/2015 1:34	AMAR382.9.20150703T013446Z.wav_chan0.xml	0
03/07/2015 1:42	AMAR382.9.20150703T014246Z.wav_chan0.xml	0
03/07/2015 1:50	AMAR382.9.20150703T015046Z.wav_chan0.xml	0
03/07/2015 1:58	AMAR382.9.20150703T015846Z.wav_chan0.xml	0
03/07/2015 2:06	AMAR382.9.20150703T020646Z.wav_chan0.xml	0
03/07/2015 2:14	AMAR382.9.20150703T021446Z.wav_chan0.xml	0
03/07/2015 2:22	AMAR382.9.20150703T022246Z.wav_chan0.xml	0
03/07/2015 2:30	AMAR382.9.20150703T023046Z.wav_chan0.xml	0
03/07/2015 2:38	AMAR382.9.20150703T023846Z.wav_chan0.xml	0
03/07/2015 2:46	AMAR382.9.20150703T024646Z.wav_chan0.xml	0
03/07/2015 2:54	AMAR382.9.20150703T025446Z.wav_chan0.xml	0
03/07/2015 3:02	AMAR382.9.20150703T030246Z.wav_chan0.xml	0
03/07/2015 3:10	AMAR382.9.20150703T031046Z.wav_chan0.xml	0
03/07/2015 3:18	AMAR382.9.20150703T031846Z.wav_chan0.xml	0
03/07/2015 3:26	AMAR382.9.20150703T032646Z.wav_chan0.xml	0
03/07/2015 3:34	AMAR382.9.20150703T033446Z.wav_chan0.xml	0
03/07/2015 3:42	AMAR382.9.20150703T034246Z.wav_chan0.xml	0
03/07/2015 3:50	AMAR382.9.20150703T035046Z.wav_chan0.xml	0
03/07/2015 3:58	AMAR382.9.20150703T035846Z.wav_chan0.xml	0
03/07/2015 4:06	AMAR382.9.20150703T040646Z.wav_chan0.xml	0
03/07/2015 4:14	AMAR382.9.20150703T041446Z.wav_chan0.xml	0
03/07/2015 4:22	AMAR382.9.20150703T042246Z.wav_chan0.xml	0
03/07/2015 4:30	AMAR382.9.20150703T043046Z.wav_chan0.xml	0
03/07/2015 4:38	AMAR382.9.20150703T043846Z.wav_chan0.xml	0
03/07/2015 4:46	AMAR382.9.20150703T044646Z.wav_chan0.xml	0
03/07/2015 4:54	AMAR382.9.20150703T045446Z.wav_chan0.xml	0
03/07/2015 5:02	AMAR382.9.20150703T050246Z.wav_chan0.xml	0
03/07/2015 5:10	AMAR382.9.20150703T051046Z.wav_chan0.xml	0
03/07/2015 5:18	AMAR382.9.20150703T051846Z.wav_chan0.xml	0
03/07/2015 5:26	AMAR382.9.20150703T052646Z.wav_chan0.xml	0
03/07/2015 5:34	AMAR382.9.20150703T053446Z.wav_chan0.xml	0
03/07/2015 5:42	AMAR382.9.20150703T054246Z.wav_chan0.xml	0
03/07/2015 5:50	AMAR382.9.20150703T055046Z.wav_chan0.xml	0
03/07/2015 5:58	AMAR382.9.20150703T055846Z.wav_chan0.xml	0
03/07/2015 6:06	AMAR382.9.20150703T060646Z.wav_chan0.xml	0
03/07/2015 6:14	AMAR382.9.20150703T061446Z.wav_chan0.xml	0
03/07/2015 6:22	AMAR382.9.20150703T062246Z.wav_chan0.xml	0
03/07/2015 6:30	AMAR382.9.20150703T063046Z.wav_chan0.xml	0
03/07/2015 6:38	AMAR382.9.20150703T063846Z.wav_chan0.xml	0
03/07/2015 6:46	AMAR382.9.20150703T064646Z.wav_chan0.xml	0
03/07/2015 6:54	AMAR382.9.20150703T065446Z.wav_chan0.xml	0
03/07/2015 7:02	AMAR382.9.20150703T070246Z.wav_chan0.xml	0
03/07/2015 7:10	AMAR382.9.20150703T071046Z.wav_chan0.xml	0
03/07/2015 7:18	AMAR382.9.20150703T071846Z.wav_chan0.xml	0
03/07/2015 7:26	AMAR382.9.20150703T072646Z.wav_chan0.xml	0
03/07/2015 7:34	AMAR382.9.20150703T073446Z.wav_chan0.xml	0
03/07/2015 7:42	AMAR382.9.20150703T074246Z.wav_chan0.xml	0
03/07/2015 7:50	AMAR382.9.20150703T075046Z.wav_chan0.xml	0
03/07/2015 7:58	AMAR382.9.20150703T075846Z.wav_chan0.xml	0
03/07/2015 8:06	AMAR382.9.20150703T080646Z.wav_chan0.xml	0
03/07/2015 8:14	AMAR382.9.20150703T081446Z.wav_chan0.xml	0
03/07/2015 8:22	AMAR382.9.20150703T082246Z.wav_chan0.xml	0
03/07/2015 8:30	AMAR382.9.20150703T083046Z.wav_chan0.xml	0
03/07/2015 8:38	AMAR382.9.20150703T083846Z.wav_chan0.xml	0
03/07/2015 8:46	AMAR382.9.20150703T084646Z.wav_chan0.xml	0
03/07/2015 8:54	AMAR382.9.20150703T085446Z.wav_chan0.xml	0
03/07/2015 9:02	AMAR382.9.20150703T090246Z.wav_chan0.xml	0
03/07/2015 9:10	AMAR382.9.20150703T091046Z.wav_chan0.xml	0
03/07/2015 9:18	AMAR382.9.20150703T091846Z.wav_chan0.xml	0
03/07/2015 9:26	AMAR382.9.20150703T092646Z.wav_chan0.xml	0
03/07/2015 9:34	AMAR382.9.20150703T093446Z.wav_chan0.xml	0
03/07/2015 9:42	AMAR382.9.20150703T094246Z.wav_chan0.xml	0
03/07/2015 9:50	AMAR382.9.20150703T095046Z.wav_chan0.xml	0
03/07/2015 9:58	AMAR382.9.20150703T095846Z.wav_chan0.xml	0
03/07/2015 10:06	AMAR382.9.20150703T100646Z.wav_chan0.xml	0
03/07/2015 10:14	AMAR382.9.20150703T101446Z.wav_chan0.xml	0
03/07/2015 10:22	AMAR382.9.20150703T102246Z.wav_chan0.xml	0
03/07/2015 10:30	AMAR382.9.20150703T103046Z.wav_chan0.xml	0
03/07/2015 10:38	AMAR382.9.20150703T103846Z.wav_chan0.xml	0
03/07/2015 10:46	AMAR382.9.20150703T104646Z.wav_chan0.xml	0
03/07/2015 10:54	AMAR382.9.20150703T105446Z.wav_chan0.xml	0
03/07/2015 11:02	AMAR382.9.20150703T110246Z.wav_chan0.xml	0
03/07/2015 11:10	AMAR382.9.20150703T111046Z.wav_chan0.xml	0
03/07/2015 11:18	AMAR382.9.20150703T111846Z.wav_chan0.xml	0
03/07/2015 11:26	AMAR382.9.20150703T112646Z.wav_chan0.xml	0
03/07/2015 11:34	AMAR382.9.20150703T113446Z.wav_chan0.xml	0
03/07/2015 11:42	AMAR382.9.20150703T114246Z.wav_chan0.xml	0
03/07/2015 11:50	AMAR382.9.20150703T115046Z.wav_chan0.xml	0
03/07/2015 11:58	AMAR382.9.20150703T115846Z.wav_chan0.xml	0
03/07/2015 12:06	AMAR382.9.20150703T120646Z.wav_chan0.xml	0
03/07/2015 12:14	AMAR382.9.20150703T121446Z.wav_chan0.xml	0
03/07/2015 12:22	AMAR382.9.20150703T122246Z.wav_chan0.xml	0
03/07/2015 12:30	AMAR382.9.20150703T123046Z.wav_chan0.xml	0
03/07/2015 12:38	AMAR382.9.20150703T123846Z.wav_chan0.xml	0
03/07/2015 12:46	AMAR382.9.20150703T124646Z.wav_chan0.xml	0
03/07/2015 12:54	AMAR382.9.20150703T125446Z.wav_chan0.xml	0
03/07/2015 13:02	AMAR382.9.20150703T130246Z.wav_chan0.xml	0
03/07/2015 13:10	AMAR382.9.20150703T131046Z.wav_chan0.xml	0
03/07/2015 13:18	AMAR382.9.20150703T131846Z.wav_chan0.xml	0
03/07/2015 13:26	AMAR382.9.20150703T132646Z.wav_chan0.xml	0
03/07/2015 13:34	AMAR382.9.20150703T133446Z.wav_chan0.xml	0
03/07/2015 13:42	AMAR382.9.20150703T134246Z.wav_chan0.xml	0
03/07/2015 13:50	AMAR382.9.20150703T135046Z.wav_chan0.xml	0
03/07/2015 13:58	AMAR382.9.20150703T135846Z.wav_chan0.xml	0
03/07/2015 14:06	AMAR382.9.20150703T140646Z.wav_chan0.xml	0
03/07/2015 14:14	AMAR382.9.20150703T141446Z.wav_chan0.xml	0
03/07/2015 14:22	AMAR382.9.20150703T142246Z.wav_chan0.xml	0
03/07/2015 14:30	AMAR382.9.20150703T143046Z.wav_chan0.xml	0
03/07/2015 14:38	AMAR382.9.20150703T143846Z.wav_chan0.xml	0
03/07/2015 14:46	AMAR382.9.20150703T144646Z.wav_chan0.xml	0
03/07/2015 14:54	AMAR382.9.20150703T145446Z.wav_chan0.xml	0
03/07/2015 15:02	AMAR382.9.20150703T150246Z.wav_chan0.xml	0
03/07/2015 15:10	AMAR382.9.20150703T151046Z.wav_chan0.xml	0
03/07/2015 15:18	AMAR382.9.20150703T151846Z.wav_chan0.xml	0
03/07/2015 15:26	AMAR382.9.20150703T152646Z.wav_chan0.xml	0
03/07/2015 15:34	AMAR382.9.20150703T153446Z.wav_chan0.xml	0
03/07/2015 15:42	AMAR382.9.20150703T154246Z.wav_chan0.xml	0
03/07/2015 15:50	AMAR382.9.20150703T155046Z.wav_chan0.xml	0
03/07/2015 15:58	AMAR382.9.20150703T155846Z.wav_chan0.xml	0
03/07/2015 16:06	AMAR382.9.20150703T160646Z.wav_chan0.xml	0
03/07/2015 16:14	AMAR382.9.20150703T161446Z.wav_chan0.xml	0
03/07/2015 16:22	AMAR382.9.20150703T162246Z.wav_chan0.xml	0
03/07/2015 16:30	AMAR382.9.20150703T163046Z.wav_chan0.xml	0
03/07/2015 16:38	AMAR382.9.20150703T163846Z.wav_chan0.xml	0
03/07/2015 16:46	AMAR382.9.20150703T164646Z.wav_chan0.xml	0
03/07/2015 16:54	AMAR382.9.20150703T165446Z.wav_chan0.xml	0
03/07/2015 17:02	AMAR382.9.20150703T170246Z.wav_chan0.xml	3
03/07/2015 17:10	AMAR382.9.20150703T171046Z.wav_chan0.xml	0
03/07/2015 17:18	AMAR382.9.20150703T171846Z.wav_chan0.xml	0
03/07/2015 17:26	AMAR382.9.20150703T172646Z.wav_chan0.xml	0
03/07/2015 17:34	AMAR382.9.20150703T173446Z.wav_chan0.xml	0
03/07/2015 17:42	AMAR382.9.20150703T174246Z.wav_chan0.xml	0
03/07/2015 17:50	AMAR382.9.20150703T175046Z.wav_chan0.xml	0
03/07/2015 17:58	AMAR382.9.20150703T175846Z.wav_chan0.xml	0
03/07/2015 18:06	AMAR382.9.20150703T180646Z.wav_chan0.xml	0
03/07/2015 18:14	AMAR382.9.20150703T181446Z.wav_chan0.xml	0
03/07/2015 18:22	AMAR382.9.20150703T182246Z.wav_chan0.xml	0
03/07/2015 18:30	AMAR382.9.20150703T183046Z.wav_chan0.xml	0
03/07/2015 18:38	AMAR382.9.20150703T183846Z.wav_chan0.xml	0
03/07/2015 18:46	AMAR382.9.20150703T184646Z.wav_chan0.xml	0
03/07/2015 18:54	AMAR382.9.20150703T185446Z.wav_chan0.xml	0
03/07/2015 19:02	AMAR382.9.20150703T190246Z.wav_chan0.xml	0
03/07/2015 19:10	AMAR382.9.20150703T191046Z.wav_chan0.xml	0
03/07/2015 19:18	AMAR382.9.20150703T191846Z.wav_chan0.xml	0
03/07/2015 19:26	AMAR382.9.20150703T192646Z.wav_chan0.xml	0
03/07/2015 19:34	AMAR382.9.20150703T193446Z.wav_chan0.xml	0
03/07/2015 19:42	AMAR382.9.20150703T194246Z.wav_chan0.xml	8
03/07/2015 19:50	AMAR382.9.20150703T195046Z.wav_chan0.xml	0
03/07/2015 19:58	AMAR382.9.20150703T195846Z.wav_chan0.xml	0
03/07/2015 20:06	AMAR382.9.20150703T200646Z.wav_chan0.xml	0
03/07/2015 20:14	AMAR382.9.20150703T201446Z.wav_chan0.xml	0
03/07/2015 20:22	AMAR382.9.20150703T202246Z.wav_chan0.xml	0
03/07/2015 20:30	AMAR382.9.20150703T203046Z.wav_chan0.xml	0
03/07/2015 20:38	AMAR382.9.20150703T203846Z.wav_chan0.xml	0
03/07/2015 20:46	AMAR382.9.20150703T204646Z.wav_chan0.xml	0
03/07/2015 20:54	AMAR382.9.20150703T205446Z.wav_chan0.xml	0
03/07/2015 21:02	AMAR382.9.20150703T210246Z.wav_chan0.xml	0
03/07/2015 21:10	AMAR382.9.20150703T211046Z.wav_chan0.xml	0
03/07/2015 21:18	AMAR382.9.20150703T211846Z.wav_chan0.xml	0
03/07/2015 21:26	AMAR382.9.20150703T212646Z.wav_chan0.xml	0
03/07/2015 21:34	AMAR382.9.20150703T213446Z.wav_chan0.xml	0
03/07/2015 21:42	AMAR382.9.20150703T214246Z.wav_chan0.xml	0
03/07/2015 21:50	AMAR382.9.20150703T215046Z.wav_chan0.xml	0
03/07/2015 21:58	AMAR382.9.20150703T215846Z.wav_chan0.xml	0
03/07/2015 22:06	AMAR382.9.20150703T220646Z.wav_chan0.xml	0
03/07/2015 22:14	AMAR382.9.20150703T221446Z.wav_chan0.xml	0
03/07/2015 22:22	AMAR382.9.20150703T222246Z.wav_chan0.xml	0
03/07/2015 22:30	AMAR382.9.20150703T223046Z.wav_chan0.xml	0
03/07/2015 22:38	AMAR382.9.20150703T223846Z.wav_chan0.xml	0
03/07/2015 22:46	AMAR382.9.20150703T224646Z.wav_chan0.xml	0
03/07/2015 22:54	AMAR382.9.20150703T225446Z.wav_chan0.xml	0
03/07/2015 23:02	AMAR382.9.20150703T230246Z.wav_chan0.xml	0
03/07/2015 23:10	AMAR382.9.20150703T231046Z.wav_chan0.xml	0
03/07/2015 23:18	AMAR382.9.20150703T231846Z.wav_chan0.xml	0
03/07/2015 23:26	AMAR382.9.20150703T232646Z.wav_chan0.xml	0
03/07/2015 23:34	AMAR382.9.20150703T233446Z.wav_chan0.xml	0
03/07/2015 23:42	AMAR382.9.20150703T234246Z.wav_chan0.xml	0
03/07/2015 23:50	AMAR382.9.20150703T235046Z.wav_chan0.xml	0
03/07/2015 23:58	AMAR382.9.20150703T235846Z.wav_chan0.xml	0
03/06/2015 0:06	AMAR382.9.20150603T000646Z.wav_chan0.xml	0
03/06/2015 0:14	AMAR382.9.20150603T001446Z.wav_chan0.xml	0
03/06/2015 0:22	AMAR382.9.20150603T002246Z.wav_chan0.xml	0
03/06/2015 0:30	AMAR382.9.20150603T003046Z.wav_chan0.xml	0
03/06/2015 0:38	AMAR382.9.20150603T003846Z.wav_chan0.xml	0
03/06/2015 0:46	AMAR382.9.20150603T004646Z.wav_chan0.xml	0
03/06/2015 0:54	AMAR382.9.20150603T005446Z.wav_chan0.xml	0
03/06/2015 1:02	AMAR382.9.20150603T010246Z.wav_chan0.xml	0
03/06/2015 1:10	AMAR382.9.20150603T011046Z.wav_chan0.xml	0
03/06/2015 1:18	AMAR382.9.20150603T011846Z.wav_chan0.xml	0
03/06/2015 1:26	AMAR382.9.20150603T012646Z.wav_chan0.xml	0
03/06/2015 1:34	AMAR382.9.20150603T013446Z.wav_chan0.xml	0
03/06/2015 1:42	AMAR382.9.20150603T014246Z.wav_chan0.xml	0
03/06/2015 1:50	AMAR382.9.20150603T015046Z.wav_chan0.xml	0
03/06/2015 1:58	AMAR382.9.20150603T015846Z.wav_chan0.xml	0
03/06/2015 2:06	AMAR382.9.20150603T020646Z.wav_chan0.xml	0
03/06/2015 2:14	AMAR382.9.20150603T021446Z.wav_chan0.xml	0
03/06/2015 2:22	AMAR382.9.20150603T022246Z.wav_chan0.xml	0
03/06/2015 2:30	AMAR382.9.20150603T023046Z.wav_chan0.xml	0
03/06/2015 2:38	AMAR382.9.20150603T023846Z.wav_chan0.xml	0
03/06/2015 2:46	AMAR382.9.20150603T024646Z.wav_chan0.xml	0
03/06/2015 2:54	AMAR382.9.20150603T025446Z.wav_chan0.xml	0
03/06/2015 3:02	AMAR382.9.20150603T030246Z.wav_chan0.xml	0
03/06/2015 3:10	AMAR382.9.20150603T031046Z.wav_chan0.xml	0
03/06/2015 3:18	AMAR382.9.20150603T031846Z.wav_chan0.xml	0
03/06/2015 3:26	AMAR382.9.20150603T032646Z.wav_chan0.xml	0
03/06/2015 3:34	AMAR382.9.20150603T033446Z.wav_chan0.xml	0
03/06/2015 3:42	AMAR382.9.20150603T034246Z.wav_chan0.xml	0
03/06/2015 3:50	AMAR382.9.20150603T035046Z.wav_chan0.xml	0
03/06/2015 3:58	AMAR382.9.20150603T035846Z.wav_chan0.xml	0
03/06/2015 4:06	AMAR382.9.20150603T040646Z.wav_chan0.xml	0
03/06/2015 4:14	AMAR382.9.20150603T041446Z.wav_chan0.xml	0
03/06/2015 4:22	AMAR382.9.20150603T042246Z.wav_chan0.xml	0
03/06/2015 4:30	AMAR382.9.20150603T043046Z.wav_chan0.xml	0
03/06/2015 4:38	AMAR382.9.20150603T043846Z.wav_chan0.xml	0
03/06/2015 4:46	AMAR382.9.20150603T044646Z.wav_chan0.xml	0
03/06/2015 4:54	AMAR382.9.20150603T045446Z.wav_chan0.xml	0
03/06/2015 5:02	AMAR382.9.20150603T050246Z.wav_chan0.xml	0
03/06/2015 5:10	AMAR382.9.20150603T051046Z.wav_chan0.xml	0
03/06/2015 5:18	AMAR382.9.20150603T051846Z.wav_chan0.xml	0
03/06/2015 5:26	AMAR382.9.20150603T052646Z.wav_chan0.xml	0
03/06/2015 5:34	AMAR382.9.20150603T053446Z.wav_chan0.xml	0
03/06/2015 5:42	AMAR382.9.20150603T054246Z.wav_chan0.xml	0
03/06/2015 5:50	AMAR382.9.20150603T055046Z.wav_chan0.xml	0
03/06/2015 5:58	AMAR382.9.20150603T055846Z.wav_chan0.xml	0
03/06/2015 6:06	AMAR382.9.20150603T060646Z.wav_chan0.xml	0
03/06/2015 6:14	AMAR382.9.20150603T061446Z.wav_chan0.xml	0
03/06/2015 6:22	AMAR382.9.20150603T062246Z.wav_chan0.xml	0
03/06/2015 6:30	AMAR382.9.20150603T063046Z.wav_chan0.xml	0
03/06/2015 6:38	AMAR382.9.20150603T063846Z.wav_chan0.xml	0
03/06/2015 6:46	AMAR382.9.20150603T064646Z.wav_chan0.xml	0
03/06/2015 6:54	AMAR382.9.20150603T065446Z.wav_chan0.xml	0
03/06/2015 7:02	AMAR382.9.20150603T070246Z.wav_chan0.xml	0
03/06/2015 7:10	AMAR382.9.20150603T071046Z.wav_chan0.xml	0
03/06/2015 7:18	AMAR382.9.20150603T071846Z.wav_chan0.xml	0
03/06/2015 7:26	AMAR382.9.20150603T072646Z.wav_chan0.xml	0
03/06/2015 7:34	AMAR382.9.20150603T073446Z.wav_chan0.xml	0
03/06/2015 7:42	AMAR382.9.20150603T074246Z.wav_chan0.xml	0
03/06/2015 7:50	AMAR382.9.20150603T075046Z.wav_chan0.xml	0
03/06/2015 7:58	AMAR382.9.20150603T075846Z.wav_chan0.xml	0
03/06/2015 8:06	AMAR382.9.20150603T080646Z.wav_chan0.xml	0
03/06/2015 8:14	AMAR382.9.20150603T081446Z.wav_chan0.xml	0
03/06/2015 8:22	AMAR382.9.20150603T082246Z.wav_chan0.xml	0
03/06/2015 8:30	AMAR382.9.20150603T083046Z.wav_chan0.xml	0
03/06/2015 8:38	AMAR382.9.20150603T083846Z.wav_chan0.xml	0
03/06/2015 8:46	AMAR382.9.20150603T084646Z.wav_chan0.xml	0
03/06/2015 8:54	AMAR382.9.20150603T085446Z.wav_chan0.xml	0
03/06/2015 9:02	AMAR382.9.20150603T090246Z.wav_chan0.xml	0
03/06/2015 9:10	AMAR382.9.20150603T091046Z.wav_chan0.xml	0
03/06/2015 9:18	AMAR382.9.20150603T091846Z.wav_chan0.xml	0
03/06/2015 9:26	AMAR382.9.20150603T092646Z.wav_chan0.xml	0
03/06/2015 9:34	AMAR382.9.20150603T093446Z.wav_chan0.xml	0
03/06/2015 9:42	AMAR382.9.20150603T094246Z.wav_chan0.xml	0
03/06/2015 9:50	AMAR382.9.20150603T095046Z.wav_chan0.xml	0
03/06/2015 9:58	AMAR382.9.20150603T095846Z.wav_chan0.xml	0
03/06/2015 10:06	AMAR382.9.20150603T100646Z.wav_chan0.xml	0
03/06/2015 10:14	AMAR382.9.20150603T101446Z.wav_chan0.xml	0
03/06/2015 10:22	AMAR382.9.20150603T102246Z.wav_chan0.xml	0
03/06/2015 10:30	AMAR382.9.20150603T103046Z.wav_chan0.xml	0
03/06/2015 10:38	AMAR382.9.20150603T103846Z.wav_chan0.xml	0
03/06/2015 10:46	AMAR382.9.20150603T104646Z.wav_chan0.xml	0
03/06/2015 10:54	AMAR382.9.20150603T105446Z.wav_chan0.xml	0
03/06/2015 11:02	AMAR382.9.20150603T110246Z.wav_chan0.xml	0
03/06/2015 11:10	AMAR382.9.20150603T111046Z.wav_chan0.xml	0
03/06/2015 11:18	AMAR382.9.20150603T111846Z.wav_chan0.xml	0
03/06/2015 11:26	AMAR382.9.20150603T112646Z.wav_chan0.xml	0
03/06/2015 11:34	AMAR382.9.20150603T113446Z.wav_chan0.xml	0
03/06/2015 11:42	AMAR382.9.20150603T114246Z.wav_chan0.xml	0
03/06/2015 11:50	AMAR382.9.20150603T115046Z.wav_chan0.xml	0
03/06/2015 11:58	AMAR382.9.20150603T115846Z.wav_chan0.xml	0
03/06/2015 12:06	AMAR382.9.20150603T120646Z.wav_chan0.xml	0
03/06/2015 12:14	AMAR382.9.20150603T121446Z.wav_chan0.xml	0
03/06/2015 12:22	AMAR382.9.20150603T122246Z.wav_chan0.xml	0
03/06/2015 12:30	AMAR382.9.20150603T123046Z.wav_chan0.xml	0
03/06/2015 12:38	AMAR382.9.20150603T123846Z.wav_chan0.xml	0
03/06/2015 12:46	AMAR382.9.20150603T124646Z.wav_chan0.xml	0
03/06/2015 12:54	AMAR382.9.20150603T125446Z.wav_chan0.xml	0
03/06/2015 13:02	AMAR382.9.20150603T130246Z.wav_chan0.xml	0
03/06/2015 13:10	AMAR382.9.20150603T131046Z.wav_chan0.xml	0
03/06/2015 13:18	AMAR382.9.20150603T131846Z.wav_chan0.xml	0
03/06/2015 13:26	AMAR382.9.20150603T132646Z.wav_chan0.xml	0
03/06/2015 13:34	AMAR382.9.20150603T133446Z.wav_chan0.xml	0
03/06/2015 13:42	AMAR382.9.20150603T134246Z.wav_chan0.xml	0
03/06/2015 13:50	AMAR382.9.20150603T135046Z.wav_chan0.xml	0
03/06/2015 13:58	AMAR382.9.20150603T135846Z.wav_chan0.xml	0
03/06/2015 14:06	AMAR382.9.20150603T140646Z.wav_chan0.xml	0
03/06/2015 14:14	AMAR382.9.20150603T141446Z.wav_chan0.xml	0
03/06/2015 14:22	AMAR382.9.20150603T142246Z.wav_chan0.xml	0
03/06/2015 14:30	AMAR382.9.20150603T143046Z.wav_chan0.xml	0
03/06/2015 14:38	AMAR382.9.20150603T143846Z.wav_chan0.xml	0
03/06/2015 14:46	AMAR382.9.20150603T144646Z.wav_chan0.xml	0
03/06/2015 14:54	AMAR382.9.20150603T145446Z.wav_chan0.xml	0
03/06/2015 15:02	AMAR382.9.20150603T150246Z.wav_chan0.xml	0
03/06/2015 15:10	AMAR382.9.20150603T151046Z.wav_chan0.xml	0
03/06/2015 15:18	AMAR382.9.20150603T151846Z.wav_chan0.xml	0
03/06/2015 15:26	AMAR382.9.20150603T152646Z.wav_chan0.xml	0
03/06/2015 15:34	AMAR382.9.20150603T153446Z.wav_chan0.xml	0
03/06/2015 15:42	AMAR382.9.20150603T154246Z.wav_chan0.xml	0
03/06/2015 15:50	AMAR382.9.20150603T155046Z.wav_chan0.xml	0
03/06/2015 15:58	AMAR382.9.20150603T155846Z.wav_chan0.xml	0
03/06/2015 16:06	AMAR382.9.20150603T160646Z.wav_chan0.xml	0
03/06/2015 16:14	AMAR382.9.20150603T161446Z.wav_chan0.xml	0
03/06/2015 16:22	AMAR382.9.20150603T162246Z.wav_chan0.xml	0
03/06/2015 16:30	AMAR382.9.20150603T163046Z.wav_chan0.xml	0
03/06/2015 16:38	AMAR382.9.20150603T163846Z.wav_chan0.xml	0
03/06/2015 16:46	AMAR382.9.20150603T164646Z.wav_chan0.xml	0
03/06/2015 16:54	AMAR382.9.20150603T165446Z.wav_chan0.xml	0
03/06/2015 17:02	AMAR382.9.20150603T170246Z.wav_chan0.xml	0
03/06/2015 17:10	AMAR382.9.20150603T171046Z.wav_chan0.xml	0
03/06/2015 17:18	AMAR382.9.20150603T171846Z.wav_chan0.xml	0
03/06/2015 17:26	AMAR382.9.20150603T172646Z.wav_chan0.xml	0
03/06/2015 17:34	AMAR382.9.20150603T173446Z.wav_chan0.xml	0
03/06/2015 17:42	AMAR382.9.20150603T174246Z.wav_chan0.xml	0
03/06/2015 17:50	AMAR382.9.20150603T175046Z.wav_chan0.xml	0
03/06/2015 17:58	AMAR382.9.20150603T175846Z.wav_chan0.xml	0
03/06/2015 18:06	AMAR382.9.20150603T180646Z.wav_chan0.xml	0
03/06/2015 18:14	AMAR382.9.20150603T181446Z.wav_chan0.xml	0
03/06/2015 18:22	AMAR382.9.20150603T182246Z.wav_chan0.xml	0
03/06/2015 18:30	AMAR382.9.20150603T183046Z.wav_chan0.xml	0
03/06/2015 18:38	AMAR382.9.20150603T183846Z.wav_chan0.xml	0
03/06/2015 18:46	AMAR382.9.20150603T184646Z.wav_chan0.xml	0
03/06/2015 18:54	AMAR382.9.20150603T185446Z.wav_chan0.xml	0
03/06/2015 19:02	AMAR382.9.20150603T190246Z.wav_chan0.xml	0
03/06/2015 19:10	AMAR382.9.20150603T191046Z.wav_chan0.xml	0
03/06/2015 19:18	AMAR382.9.20150603T191846Z.wav_chan0.xml	0
03/06/2015 19:26	AMAR382.9.20150603T192646Z.wav_chan0.xml	0
03/06/2015 19:34	AMAR382.9.20150603T193446Z.wav_chan0.xml	0
03/06/2015 19:42	AMAR382.9.20150603T194246Z.wav_chan0.xml	0
03/06/2015 19:50	AMAR382.9.20150603T195046Z.wav_chan0.xml	0
03/06/2015 19:58	AMAR382.9.20150603T195846Z.wav_chan0.xml	0
03/06/2015 20:06	AMAR382.9.20150603T200646Z.wav_chan0.xml	0
03/06/2015 20:14	AMAR382.9.20150603T201446Z.wav_chan0.xml	0
03/06/2015 20:22	AMAR382.9.20150603T202246Z.wav_chan0.xml	0
03/06/2015 20:30	AMAR382.9.20150603T203046Z.wav_chan0.xml	0
03/06/2015 20:38	AMAR382.9.20150603T203846Z.wav_chan0.xml	0
03/06/2015 20:46	AMAR382.9.20150603T204646Z.wav_chan0.xml	0
03/06/2015 20:54	AMAR382.9.20150603T205446Z.wav_chan0.xml	0
03/06/2015 21:02	AMAR382.9.20150603T210246Z.wav_chan0.xml	0
03/06/2015 21:10	AMAR382.9.20150603T211046Z.wav_chan0.xml	0
03/06/2015 21:18	AMAR382.9.20150603T211846Z.wav_chan0.xml	0
03/06/2015 21:26	AMAR382.9.20150603T212646Z.wav_chan0.xml	0
03/06/2015 21:34	AMAR382.9.20150603T213446Z.wav_chan0.xml	0
03/06/2015 21:42	AMAR382.9.20150603T214246Z.wav_chan0.xml	0
03/06/2015 21:50	AMAR382.9.20150603T215046Z.wav_chan0.xml	0
03/06/2015 21:58	AMAR382.9.20150603T215846Z.wav_chan0.xml	0
03/06/2015 22:06	AMAR382.9.20150603T220646Z.wav_chan0.xml	0
03/06/2015 22:14	AMAR382.9.20150603T221446Z.wav_chan0.xml	0
03/06/2015 22:22	AMAR382.9.20150603T222246Z.wav_chan0.xml	0
03/06/2015 22:30	AMAR382.9.20150603T223046Z.wav_chan0.xml	0
03/06/2015 22:38	AMAR382.9.20150603T223846Z.wav_chan0.xml	0
03/06/2015 22:46	AMAR382.9.20150603T224646Z.wav_chan0.xml	0
03/06/2015 22:54	AMAR382.9.20150603T225446Z.wav_chan0.xml	0
03/06/2015 23:02	AMAR382.9.20150603T230246Z.wav_chan0.xml	0
03/06/2015 23:10	AMAR382.9.20150603T231046Z.wav_chan0.xml	0
03/06/2015 23:18	AMAR382.9.20150603T231846Z.wav_chan0.xml	0
03/06/2015 23:26	AMAR382.9.20150603T232646Z.wav_chan0.xml	0
03/06/2015 23:34	AMAR382.9.20150603T233446Z.wav_chan0.xml	0
03/06/2015 23:42	AMAR382.9.20150603T234246Z.wav_chan0.xml	0
03/06/2015 23:50	AMAR382.9.20150603T235046Z.wav_chan0.xml	0
03/06/2015 23:58	AMAR382.9.20150603T235846Z.wav_chan0.xml	0
04/08/2015 0:06	AMAR382.9.20150804T000646Z.wav_chan0.xml	0
04/08/2015 0:14	AMAR382.9.20150804T001446Z.wav_chan0.xml	0
04/08/2015 0:22	AMAR382.9.20150804T002246Z.wav_chan0.xml	0
04/08/2015 0:30	AMAR382.9.20150804T003046Z.wav_chan0.xml	0
04/08/2015 0:38	AMAR382.9.20150804T003846Z.wav_chan0.xml	0
04/08/2015 0:46	AMAR382.9.20150804T004646Z.wav_chan0.xml	0
04/08/2015 0:54	AMAR382.9.20150804T005446Z.wav_chan0.xml	0
04/08/2015 1:02	AMAR382.9.20150804T010246Z.wav_chan0.xml	0
04/08/2015 1:10	AMAR382.9.20150804T011046Z.wav_chan0.xml	0
04/08/2015 1:18	AMAR382.9.20150804T011846Z.wav_chan0.xml	0
04/08/2015 1:26	AMAR382.9.20150804T012646Z.wav_chan0.xml	0
04/08/2015 1:34	AMAR382.9.20150804T013446Z.wav_chan0.xml	0
04/08/2015 1:42	AMAR382.9.20150804T014246Z.wav_chan0.xml	0
04/08/2015 1:50	AMAR382.9.20150804T015046Z.wav_chan0.xml	0
04/08/2015 1:58	AMAR382.9.20150804T015846Z.wav_chan0.xml	0
04/08/2015 2:06	AMAR382.9.20150804T020646Z.wav_chan0.xml	0
04/08/2015 2:14	AMAR382.9.20150804T021446Z.wav_chan0.xml	0
04/08/2015 2:22	AMAR382.9.20150804T022246Z.wav_chan0.xml	0
04/08/2015 2:30	AMAR382.9.20150804T023046Z.wav_chan0.xml	0
04/08/2015 2:38	AMAR382.9.20150804T023846Z.wav_chan0.xml	0
04/08/2015 2:46	AMAR382.9.20150804T024646Z.wav_chan0.xml	0
04/08/2015 2:54	AMAR382.9.20150804T025446Z.wav_chan0.xml	0
04/08/2015 3:02	AMAR382.9.20150804T030246Z.wav_chan0.xml	0
04/08/2015 3:10	AMAR382.9.20150804T031046Z.wav_chan0.xml	0
04/08/2015 3:18	AMAR382.9.20150804T031846Z.wav_chan0.xml	0
04/08/2015 3:26	AMAR382.9.20150804T032646Z.wav_chan0.xml	0
04/08/2015 3:34	AMAR382.9.20150804T033446Z.wav_chan0.xml	0
04/08/2015 3:42	AMAR382.9.20150804T034246Z.wav_chan0.xml	0
04/08/2015 3:50	AMAR382.9.20150804T035046Z.wav_chan0.xml	0
04/08/2015 3:58	AMAR382.9.20150804T035846Z.wav_chan0.xml	0
04/08/2015 4:06	AMAR382.9.20150804T040646Z.wav_chan0.xml	0
04/08/2015 4:14	AMAR382.9.20150804T041446Z.wav_chan0.xml	0
04/08/2015 4:22	AMAR382.9.20150804T042246Z.wav_chan0.xml	0
04/08/2015 4:30	AMAR382.9.20150804T043046Z.wav_chan0.xml	0
04/08/2015 4:38	AMAR382.9.20150804T043846Z.wav_chan0.xml	0
04/08/2015 4:46	AMAR382.9.20150804T044646Z.wav_chan0.xml	0
04/08/2015 4:54	AMAR382.9.20150804T045446Z.wav_chan0.xml	0
04/08/2015 5:02	AMAR382.9.20150804T050246Z.wav_chan0.xml	0
04/08/2015 5:10	AMAR382.9.20150804T051046Z.wav_chan0.xml	0
04/08/2015 5:18	AMAR382.9.20150804T051846Z.wav_chan0.xml	0
04/08/2015 5:26	AMAR382.9.20150804T052646Z.wav_chan0.xml	0
04/08/2015 5:34	AMAR382.9.20150804T053446Z.wav_chan0.xml	0
04/08/2015 5:42	AMAR382.9.20150804T054246Z.wav_chan0.xml	0
04/08/2015 5:50	AMAR382.9.20150804T055046Z.wav_chan0.xml	0
04/08/2015 5:58	AMAR382.9.20150804T055846Z.wav_chan0.xml	0
04/08/2015 6:06	AMAR382.9.20150804T060646Z.wav_chan0.xml	0
04/08/2015 6:14	AMAR382.9.20150804T061446Z.wav_chan0.xml	0
04/08/2015 6:22	AMAR382.9.20150804T062246Z.wav_chan0.xml	0
04/08/2015 6:30	AMAR382.9.20150804T063046Z.wav_chan0.xml	0
04/08/2015 6:38	AMAR382.9.20150804T063846Z.wav_chan0.xml	0
04/08/2015 6:46	AMAR382.9.20150804T064646Z.wav_chan0.xml	0
04/08/2015 6:54	AMAR382.9.20150804T065446Z.wav_chan0.xml	0
04/08/2015 7:02	AMAR382.9.20150804T070246Z.wav_chan0.xml	0
04/08/2015 7:10	AMAR382.9.20150804T071046Z.wav_chan0.xml	0
04/08/2015 7:18	AMAR382.9.20150804T071846Z.wav_chan0.xml	0
04/08/2015 7:26	AMAR382.9.20150804T072646Z.wav_chan0.xml	0
04/08/2015 7:34	AMAR382.9.20150804T073446Z.wav_chan0.xml	0
04/08/2015 7:42	AMAR382.9.20150804T074246Z.wav_chan0.xml	0
04/08/2015 7:50	AMAR382.9.20150804T075046Z.wav_chan0.xml	0
04/08/2015 7:58	AMAR382.9.20150804T075846Z.wav_chan0.xml	0
04/08/2015 8:06	AMAR382.9.20150804T080646Z.wav_chan0.xml	0
04/08/2015 8:14	AMAR382.9.20150804T081446Z.wav_chan0.xml	0
04/08/2015 8:22	AMAR382.9.20150804T082246Z.wav_chan0.xml	0
04/08/2015 8:30	AMAR382.9.20150804T083046Z.wav_chan0.xml	0
04/08/2015 8:38	AMAR382.9.20150804T083846Z.wav_chan0.xml	0
04/08/2015 8:46	AMAR382.9.20150804T084646Z.wav_chan0.xml	0
04/08/2015 8:54	AMAR382.9.20150804T085446Z.wav_chan0.xml	0
04/08/2015 9:02	AMAR382.9.20150804T090246Z.wav_chan0.xml	0
04/08/2015 9:10	AMAR382.9.20150804T091046Z.wav_chan0.xml	0
04/08/2015 9:18	AMAR382.9.20150804T091846Z.wav_chan0.xml	0
04/08/2015 9:26	AMAR382.9.20150804T092646Z.wav_chan0.xml	0
04/08/2015 9:34	AMAR382.9.20150804T093446Z.wav_chan0.xml	0
04/08/2015 9:42	AMAR382.9.20150804T094246Z.wav_chan0.xml	0
04/08/2015 9:50	AMAR382.9.20150804T095046Z.wav_chan0.xml	0
04/08/2015 9:58	AMAR382.9.20150804T095846Z.wav_chan0.xml	0
04/08/2015 10:06	AMAR382.9.20150804T100646Z.wav_chan0.xml	0
04/08/2015 10:14	AMAR382.9.20150804T101446Z.wav_chan0.xml	0
04/08/2015 10:22	AMAR382.9.20150804T102246Z.wav_chan0.xml	0
04/08/2015 10:30	AMAR382.9.20150804T103046Z.wav_chan0.xml	0
04/08/2015 10:38	AMAR382.9.20150804T103846Z.wav_chan0.xml	0
04/08/2015 10:46	AMAR382.9.20150804T104646Z.wav_chan0.xml	0
04/08/2015 10:54	AMAR382.9.20150804T105446Z.wav_chan0.xml	0
04/08/2015 11:02	AMAR382.9.20150804T110246Z.wav_chan0.xml	0
04/08/2015 11:10	AMAR382.9.20150804T111046Z.wav_chan0.xml	0
04/08/2015 11:18	AMAR382.9.20150804T111846Z.wav_chan0.xml	0
04/08/2015 11:26	AMAR382.9.20150804T112646Z.wav_chan0.xml	0
04/08/2015 11:34	AMAR382.9.20150804T113446Z.wav_chan0.xml	0
04/08/2015 11:42	AMAR382.9.20150804T114246Z.wav_chan0.xml	0
04/08/2015 11:50	AMAR382.9.20150804T115046Z.wav_chan0.xml	0
04/08/2015 11:58	AMAR382.9.20150804T115846Z.wav_chan0.xml	0
04/08/2015 12:06	AMAR382.9.20150804T120646Z.wav_chan0.xml	0
04/08/2015 12:14	AMAR382.9.20150804T121446Z.wav_chan0.xml	0
04/08/2015 12:22	AMAR382.9.20150804T122246Z.wav_chan0.xml	0
04/08/2015 12:30	AMAR382.9.20150804T123046Z.wav_chan0.xml	0
04/08/2015 12:38	AMAR382.9.20150804T123846Z.wav_chan0.xml	0
04/08/2015 12:46	AMAR382.9.20150804T124646Z.wav_chan0.xml	0
04/08/2015 12:54	AMAR382.9.20150804T125446Z.wav_chan0.xml	0
04/08/2015 13:02	AMAR382.9.20150804T130246Z.wav_chan0.xml	0
04/08/2015 13:10	AMAR382.9.20150804T131046Z.wav_chan0.xml	0
04/08/2015 13:18	AMAR382.9.20150804T131846Z.wav_chan0.xml	0
04/08/2015 13:26	AMAR382.9.20150804T132646Z.wav_chan0.xml	0
04/08/2015 13:34	AMAR382.9.20150804T133446Z.wav_chan0.xml	0
04/08/2015 13:42	AMAR382.9.20150804T134246Z.wav_chan0.xml	0
04/08/2015 13:50	AMAR382.9.20150804T135046Z.wav_chan0.xml	0
04/08/2015 13:58	AMAR382.9.20150804T135846Z.wav_chan0.xml	0
04/08/2015 14:06	AMAR382.9.20150804T140646Z.wav_chan0.xml	0
04/08/2015 14:14	AMAR382.9.20150804T141446Z.wav_chan0.xml	0
04/08/2015 14:22	AMAR382.9.20150804T142246Z.wav_chan0.xml	0
04/08/2015 14:30	AMAR382.9.20150804T143046Z.wav_chan0.xml	0
04/08/2015 14:38	AMAR382.9.20150804T143846Z.wav_chan0.xml	0
04/08/2015 14:46	AMAR382.9.20150804T144646Z.wav_chan0.xml	0
04/08/2015 14:54	AMAR382.9.20150804T145446Z.wav_chan0.xml	0
04/08/2015 15:02	AMAR382.9.20150804T150246Z.wav_chan0.xml	0
04/08/2015 15:10	AMAR382.9.20150804T151046Z.wav_chan0.xml	0
04/08/2015 15:18	AMAR382.9.20150804T151846Z.wav_chan0.xml	0
04/08/2015 15:26	AMAR382.9.20150804T152646Z.wav_chan0.xml	0
04/08/2015 15:34	AMAR382.9.20150804T153446Z.wav_chan0.xml	0
04/08/2015 15:42	AMAR382.9.20150804T154246Z.wav_chan0.xml	0
04/08/2015 15:50	AMAR382.9.20150804T155046Z.wav_chan0.xml	0
04/08/2015 15:58	AMAR382.9.20150804T155846Z.wav_chan0.xml	0
04/08/2015 16:06	AMAR382.9.20150804T160646Z.wav_chan0.xml	0
04/08/2015 16:14	AMAR382.9.20150804T161446Z.wav_chan0.xml	0
04/08/2015 16:22	AMAR382.9.20150804T162246Z.wav_chan0.xml	0
04/08/2015 16:30	AMAR382.9.20150804T163046Z.wav_chan0.xml	0
04/08/2015 16:38	AMAR382.9.20150804T163846Z.wav_chan0.xml	0
04/08/2015 16:46	AMAR382.9.20150804T164646Z.wav_chan0.xml	0
04/08/2015 16:54	AMAR382.9.20150804T165446Z.wav_chan0.xml	0
04/08/2015 17:02	AMAR382.9.20150804T170246Z.wav_chan0.xml	0
04/08/2015 17:10	AMAR382.9.20150804T171046Z.wav_chan0.xml	0
04/08/2015 17:18	AMAR382.9.20150804T171846Z.wav_chan0.xml	0
04/08/2015 17:26	AMAR382.9.20150804T172646Z.wav_chan0.xml	0
04/08/2015 17:34	AMAR382.9.20150804T173446Z.wav_chan0.xml	0
04/08/2015 17:42	AMAR382.9.20150804T174246Z.wav_chan0.xml	0
04/08/2015 17:50	AMAR382.9.20150804T175046Z.wav_chan0.xml	0
04/08/2015 17:58	AMAR382.9.20150804T175846Z.wav_chan0.xml	0
04/08/2015 18:06	AMAR382.9.20150804T180646Z.wav_chan0.xml	0
04/08/2015 18:14	AMAR382.9.20150804T181446Z.wav_chan0.xml	0
04/08/2015 18:22	AMAR382.9.20150804T182246Z.wav_chan0.xml	0
04/08/2015 18:30	AMAR382.9.20150804T183046Z.wav_chan0.xml	0
04/08/2015 18:38	AMAR382.9.20150804T183846Z.wav_chan0.xml	0
04/08/2015 18:46	AMAR382.9.20150804T184646Z.wav_chan0.xml	0
04/08/2015 18:54	AMAR382.9.20150804T185446Z.wav_chan0.xml	0
04/08/2015 19:02	AMAR382.9.20150804T190246Z.wav_chan0.xml	0
04/08/2015 19:10	AMAR382.9.20150804T191046Z.wav_chan0.xml	0
04/08/2015 19:18	AMAR382.9.20150804T191846Z.wav_chan0.xml	0
04/08/2015 19:26	AMAR382.9.20150804T192646Z.wav_chan0.xml	0
04/08/2015 19:34	AMAR382.9.20150804T193446Z.wav_chan0.xml	0
04/08/2015 19:42	AMAR382.9.20150804T194246Z.wav_chan0.xml	0
04/08/2015 19:50	AMAR382.9.20150804T195046Z.wav_chan0.xml	0
04/08/2015 19:58	AMAR382.9.20150804T195846Z.wav_chan0.xml	0
04/08/2015 20:06	AMAR382.9.20150804T200646Z.wav_chan0.xml	0
04/08/2015 20:14	AMAR382.9.20150804T201446Z.wav_chan0.xml	0
04/08/2015 20:22	AMAR382.9.20150804T202246Z.wav_chan0.xml	0
04/08/2015 20:30	AMAR382.9.20150804T203046Z.wav_chan0.xml	0
04/08/2015 20:38	AMAR382.9.20150804T203846Z.wav_chan0.xml	0
04/08/2015 20:46	AMAR382.9.20150804T204646Z.wav_chan0.xml	0
04/08/2015 20:54	AMAR382.9.20150804T205446Z.wav_chan0.xml	0
04/08/2015 21:02	AMAR382.9.20150804T210246Z.wav_chan0.xml	0
04/08/2015 21:10	AMAR382.9.20150804T211046Z.wav_chan0.xml	0
04/08/2015 21:18	AMAR382.9.20150804T211846Z.wav_chan0.xml	0
04/08/2015 21:26	AMAR382.9.20150804T212646Z.wav_chan0.xml	0
04/08/2015 21:34	AMAR382.9.20150804T213446Z.wav_chan0.xml	0
04/08/2015 21:42	AMAR382.9.20150804T214246Z.wav_chan0.xml	0
04/08/2015 21:50	AMAR382.9.20150804T215046Z.wav_chan0.xml	0
04/08/2015 21:58	AMAR382.9.20150804T215846Z.wav_chan0.xml	0
04/08/2015 22:06	AMAR382.9.20150804T220646Z.wav_chan0.xml	0
04/08/2015 22:14	AMAR382.9.20150804T221446Z.wav_chan0.xml	0
04/08/2015 22:22	AMAR382.9.20150804T222246Z.wav_chan0.xml	0
04/08/2015 22:30	AMAR382.9.20150804T223046Z.wav_chan0.xml	0
04/08/2015 22:38	AMAR382.9.20150804T223846Z.wav_chan0.xml	0
04/08/2015 22:46	AMAR382.9.20150804T224646Z.wav_chan0.xml	0
04/08/2015 22:54	AMAR382.9.20150804T225446Z.wav_chan0.xml	0
04/08/2015 23:02	AMAR382.9.20150804T230246Z.wav_chan0.xml	0
04/08/2015 23:10	AMAR382.9.20150804T231046Z.wav_chan0.xml	0
04/08/2015 23:18	AMAR382.9.20150804T231846Z.wav_chan0.xml	0
04/08/2015 23:26	AMAR382.9.20150804T232646Z.wav_chan0.xml	0
04/08/2015 23:34	AMAR382.9.20150804T233446Z.wav_chan0.xml	0
04/08/2015 23:42	AMAR382.9.20150804T234246Z.wav_chan0.xml	0
04/08/2015 23:50	AMAR382.9.20150804T235046Z.wav_chan0.xml	0
04/08/2015 23:58	AMAR382.9.20150804T235846Z.wav_chan0.xml	0
04/07/2015 0:06	AMAR382.9.20150704T000646Z.wav_chan0.xml	0
04/07/2015 0:14	AMAR382.9.20150704T001446Z.wav_chan0.xml	0
04/07/2015 0:22	AMAR382.9.20150704T002246Z.wav_chan0.xml	0
04/07/2015 0:30	AMAR382.9.20150704T003046Z.wav_chan0.xml	0
04/07/2015 0:38	AMAR382.9.20150704T003846Z.wav_chan0.xml	0
04/07/2015 0:46	AMAR382.9.20150704T004646Z.wav_chan0.xml	0
04/07/2015 0:54	AMAR382.9.20150704T005446Z.wav_chan0.xml	0
04/07/2015 1:02	AMAR382.9.20150704T010246Z.wav_chan0.xml	0
04/07/2015 1:10	AMAR382.9.20150704T011046Z.wav_chan0.xml	0
04/07/2015 1:18	AMAR382.9.20150704T011846Z.wav_chan0.xml	0
04/07/2015 1:26	AMAR382.9.20150704T012646Z.wav_chan0.xml	0
04/07/2015 1:34	AMAR382.9.20150704T013446Z.wav_chan0.xml	0
04/07/2015 1:42	AMAR382.9.20150704T014246Z.wav_chan0.xml	0
04/07/2015 1:50	AMAR382.9.20150704T015046Z.wav_chan0.xml	0
04/07/2015 1:58	AMAR382.9.20150704T015846Z.wav_chan0.xml	0
04/07/2015 2:06	AMAR382.9.20150704T020646Z.wav_chan0.xml	0
04/07/2015 2:14	AMAR382.9.20150704T021446Z.wav_chan0.xml	0
04/07/2015 2:22	AMAR382.9.20150704T022246Z.wav_chan0.xml	0
04/07/2015 2:30	AMAR382.9.20150704T023046Z.wav_chan0.xml	0
04/07/2015 2:38	AMAR382.9.20150704T023846Z.wav_chan0.xml	0
04/07/2015 2:46	AMAR382.9.20150704T024646Z.wav_chan0.xml	0
04/07/2015 2:54	AMAR382.9.20150704T025446Z.wav_chan0.xml	0
04/07/2015 3:02	AMAR382.9.20150704T030246Z.wav_chan0.xml	0
04/07/2015 3:10	AMAR382.9.20150704T031046Z.wav_chan0.xml	0
04/07/2015 3:18	AMAR382.9.20150704T031846Z.wav_chan0.xml	0
04/07/2015 3:26	AMAR382.9.20150704T032646Z.wav_chan0.xml	0
04/07/2015 3:34	AMAR382.9.20150704T033446Z.wav_chan0.xml	0
04/07/2015 3:42	AMAR382.9.20150704T034246Z.wav_chan0.xml	0
04/07/2015 3:50	AMAR382.9.20150704T035046Z.wav_chan0.xml	0
04/07/2015 3:58	AMAR382.9.20150704T035846Z.wav_chan0.xml	0
04/07/2015 4:06	AMAR382.9.20150704T040646Z.wav_chan0.xml	0
04/07/2015 4:14	AMAR382.9.20150704T041446Z.wav_chan0.xml	0
04/07/2015 4:22	AMAR382.9.20150704T042246Z.wav_chan0.xml	0
04/07/2015 4:30	AMAR382.9.20150704T043046Z.wav_chan0.xml	0
04/07/2015 4:38	AMAR382.9.20150704T043846Z.wav_chan0.xml	0
04/07/2015 4:46	AMAR382.9.20150704T044646Z.wav_chan0.xml	0
04/07/2015 4:54	AMAR382.9.20150704T045446Z.wav_chan0.xml	0
04/07/2015 5:02	AMAR382.9.20150704T050246Z.wav_chan0.xml	0
04/07/2015 5:10	AMAR382.9.20150704T051046Z.wav_chan0.xml	0
04/07/2015 5:18	AMAR382.9.20150704T051846Z.wav_chan0.xml	0
04/07/2015 5:26	AMAR382.9.20150704T052646Z.wav_chan0.xml	0
04/07/2015 5:34	AMAR382.9.20150704T053446Z.wav_chan0.xml	0
04/07/2015 5:42	AMAR382.9.20150704T054246Z.wav_chan0.xml	0
04/07/2015 5:50	AMAR382.9.20150704T055046Z.wav_chan0.xml	0
04/07/2015 5:58	AMAR382.9.20150704T055846Z.wav_chan0.xml	0
04/07/2015 6:06	AMAR382.9.20150704T060646Z.wav_chan0.xml	0
04/07/2015 6:14	AMAR382.9.20150704T061446Z.wav_chan0.xml	0
04/07/2015 6:22	AMAR382.9.20150704T062246Z.wav_chan0.xml	0
04/07/2015 6:30	AMAR382.9.20150704T063046Z.wav_chan0.xml	0
04/07/2015 6:38	AMAR382.9.20150704T063846Z.wav_chan0.xml	0
04/07/2015 6:46	AMAR382.9.20150704T064646Z.wav_chan0.xml	0
04/07/2015 6:54	AMAR382.9.20150704T065446Z.wav_chan0.xml	0
04/07/2015 7:02	AMAR382.9.20150704T070246Z.wav_chan0.xml	0
04/07/2015 7:10	AMAR382.9.20150704T071046Z.wav_chan0.xml	0
04/07/2015 7:18	AMAR382.9.20150704T071846Z.wav_chan0.xml	0
04/07/2015 7:26	AMAR382.9.20150704T072646Z.wav_chan0.xml	0
04/07/2015 7:34	AMAR382.9.20150704T073446Z.wav_chan0.xml	0
04/07/2015 7:42	AMAR382.9.20150704T074246Z.wav_chan0.xml	0
04/07/2015 7:50	AMAR382.9.20150704T075046Z.wav_chan0.xml	1
04/07/2015 7:58	AMAR382.9.20150704T075846Z.wav_chan0.xml	2
04/07/2015 8:06	AMAR382.9.20150704T080646Z.wav_chan0.xml	0
04/07/2015 8:14	AMAR382.9.20150704T081446Z.wav_chan0.xml	0
04/07/2015 8:22	AMAR382.9.20150704T082246Z.wav_chan0.xml	0
04/07/2015 8:30	AMAR382.9.20150704T083046Z.wav_chan0.xml	0
04/07/2015 8:38	AMAR382.9.20150704T083846Z.wav_chan0.xml	0
04/07/2015 8:46	AMAR382.9.20150704T084646Z.wav_chan0.xml	0
04/07/2015 8:54	AMAR382.9.20150704T085446Z.wav_chan0.xml	0
04/07/2015 9:02	AMAR382.9.20150704T090246Z.wav_chan0.xml	0
04/07/2015 9:10	AMAR382.9.20150704T091046Z.wav_chan0.xml	0
04/07/2015 9:18	AMAR382.9.20150704T091846Z.wav_chan0.xml	0
04/07/2015 9:26	AMAR382.9.20150704T092646Z.wav_chan0.xml	0
04/07/2015 9:34	AMAR382.9.20150704T093446Z.wav_chan0.xml	0
04/07/2015 9:42	AMAR382.9.20150704T094246Z.wav_chan0.xml	0
04/07/2015 9:50	AMAR382.9.20150704T095046Z.wav_chan0.xml	0
04/07/2015 9:58	AMAR382.9.20150704T095846Z.wav_chan0.xml	0
04/07/2015 10:06	AMAR382.9.20150704T100646Z.wav_chan0.xml	0
04/07/2015 10:14	AMAR382.9.20150704T101446Z.wav_chan0.xml	0
04/07/2015 10:22	AMAR382.9.20150704T102246Z.wav_chan0.xml	0
04/07/2015 10:30	AMAR382.9.20150704T103046Z.wav_chan0.xml	0
04/07/2015 10:38	AMAR382.9.20150704T103846Z.wav_chan0.xml	0
04/07/2015 10:46	AMAR382.9.20150704T104646Z.wav_chan0.xml	0
04/07/2015 10:54	AMAR382.9.20150704T105446Z.wav_chan0.xml	0
04/07/2015 11:02	AMAR382.9.20150704T110246Z.wav_chan0.xml	0
04/07/2015 11:10	AMAR382.9.20150704T111046Z.wav_chan0.xml	0
04/07/2015 11:18	AMAR382.9.20150704T111846Z.wav_chan0.xml	0
04/07/2015 11:26	AMAR382.9.20150704T112646Z.wav_chan0.xml	0
04/07/2015 11:34	AMAR382.9.20150704T113446Z.wav_chan0.xml	0
04/07/2015 11:42	AMAR382.9.20150704T114246Z.wav_chan0.xml	0
04/07/2015 11:50	AMAR382.9.20150704T115046Z.wav_chan0.xml	0
04/07/2015 11:58	AMAR382.9.20150704T115846Z.wav_chan0.xml	0
04/07/2015 12:06	AMAR382.9.20150704T120646Z.wav_chan0.xml	0
04/07/2015 12:14	AMAR382.9.20150704T121446Z.wav_chan0.xml	0
04/07/2015 12:22	AMAR382.9.20150704T122246Z.wav_chan0.xml	0
04/07/2015 12:30	AMAR382.9.20150704T123046Z.wav_chan0.xml	0
04/07/2015 12:38	AMAR382.9.20150704T123846Z.wav_chan0.xml	0
04/07/2015 12:46	AMAR382.9.20150704T124646Z.wav_chan0.xml	0
04/07/2015 12:54	AMAR382.9.20150704T125446Z.wav_chan0.xml	0
04/07/2015 13:02	AMAR382.9.20150704T130246Z.wav_chan0.xml	0
04/07/2015 13:10	AMAR382.9.20150704T131046Z.wav_chan0.xml	0
04/07/2015 13:18	AMAR382.9.20150704T131846Z.wav_chan0.xml	0
04/07/2015 13:26	AMAR382.9.20150704T132646Z.wav_chan0.xml	0
04/07/2015 13:34	AMAR382.9.20150704T133446Z.wav_chan0.xml	0
04/07/2015 13:42	AMAR382.9.20150704T134246Z.wav_chan0.xml	0
04/07/2015 13:50	AMAR382.9.20150704T135046Z.wav_chan0.xml	0
04/07/2015 13:58	AMAR382.9.20150704T135846Z.wav_chan0.xml	0
04/07/2015 14:06	AMAR382.9.20150704T140646Z.wav_chan0.xml	0
04/07/2015 14:14	AMAR382.9.20150704T141446Z.wav_chan0.xml	0
04/07/2015 14:22	AMAR382.9.20150704T142246Z.wav_chan0.xml	0
04/07/2015 14:30	AMAR382.9.20150704T143046Z.wav_chan0.xml	0
04/07/2015 14:38	AMAR382.9.20150704T143846Z.wav_chan0.xml	0
04/07/2015 14:46	AMAR382.9.20150704T144646Z.wav_chan0.xml	0
04/07/2015 14:54	AMAR382.9.20150704T145446Z.wav_chan0.xml	0
04/07/2015 15:02	AMAR382.9.20150704T150246Z.wav_chan0.xml	0
04/07/2015 15:10	AMAR382.9.20150704T151046Z.wav_chan0.xml	0
04/07/2015 15:18	AMAR382.9.20150704T151846Z.wav_chan0.xml	0
04/07/2015 15:26	AMAR382.9.20150704T152646Z.wav_chan0.xml	0
04/07/2015 15:34	AMAR382.9.20150704T153446Z.wav_chan0.xml	0
04/07/2015 15:42	AMAR382.9.20150704T154246Z.wav_chan0.xml	0
04/07/2015 15:50	AMAR382.9.20150704T155046Z.wav_chan0.xml	0
04/07/2015 15:58	AMAR382.9.20150704T155846Z.wav_chan0.xml	0
04/07/2015 16:06	AMAR382.9.20150704T160646Z.wav_chan0.xml	0
04/07/2015 16:14	AMAR382.9.20150704T161446Z.wav_chan0.xml	0
04/07/2015 16:22	AMAR382.9.20150704T162246Z.wav_chan0.xml	0
04/07/2015 16:30	AMAR382.9.20150704T163046Z.wav_chan0.xml	0
04/07/2015 16:38	AMAR382.9.20150704T163846Z.wav_chan0.xml	0
04/07/2015 16:46	AMAR382.9.20150704T164646Z.wav_chan0.xml	0
04/07/2015 16:54	AMAR382.9.20150704T165446Z.wav_chan0.xml	0
04/07/2015 17:02	AMAR382.9.20150704T170246Z.wav_chan0.xml	0
04/07/2015 17:10	AMAR382.9.20150704T171046Z.wav_chan0.xml	0
04/07/2015 17:18	AMAR382.9.20150704T171846Z.wav_chan0.xml	0
04/07/2015 17:26	AMAR382.9.20150704T172646Z.wav_chan0.xml	0
04/07/2015 17:34	AMAR382.9.20150704T173446Z.wav_chan0.xml	0
04/07/2015 17:42	AMAR382.9.20150704T174246Z.wav_chan0.xml	0
04/07/2015 17:50	AMAR382.9.20150704T175046Z.wav_chan0.xml	0
04/07/2015 17:58	AMAR382.9.20150704T175846Z.wav_chan0.xml	0
04/07/2015 18:06	AMAR382.9.20150704T180646Z.wav_chan0.xml	0
04/07/2015 18:14	AMAR382.9.20150704T181446Z.wav_chan0.xml	0
04/07/2015 18:22	AMAR382.9.20150704T182246Z.wav_chan0.xml	0
04/07/2015 18:30	AMAR382.9.20150704T183046Z.wav_chan0.xml	0
04/07/2015 18:38	AMAR382.9.20150704T183846Z.wav_chan0.xml	0
04/07/2015 18:46	AMAR382.9.20150704T184646Z.wav_chan0.xml	0
04/07/2015 18:54	AMAR382.9.20150704T185446Z.wav_chan0.xml	0
04/07/2015 19:02	AMAR382.9.20150704T190246Z.wav_chan0.xml	0
04/07/2015 19:10	AMAR382.9.20150704T191046Z.wav_chan0.xml	0
04/07/2015 19:18	AMAR382.9.20150704T191846Z.wav_chan0.xml	0
04/07/2015 19:26	AMAR382.9.20150704T192646Z.wav_chan0.xml	0
04/07/2015 19:34	AMAR382.9.20150704T193446Z.wav_chan0.xml	0
04/07/2015 19:42	AMAR382.9.20150704T194246Z.wav_chan0.xml	0
04/07/2015 19:50	AMAR382.9.20150704T195046Z.wav_chan0.xml	0
04/07/2015 19:58	AMAR382.9.20150704T195846Z.wav_chan0.xml	0
04/07/2015 20:06	AMAR382.9.20150704T200646Z.wav_chan0.xml	0
04/07/2015 20:14	AMAR382.9.20150704T201446Z.wav_chan0.xml	0
04/07/2015 20:22	AMAR382.9.20150704T202246Z.wav_chan0.xml	0
04/07/2015 20:30	AMAR382.9.20150704T203046Z.wav_chan0.xml	0
04/07/2015 20:38	AMAR382.9.20150704T203846Z.wav_chan0.xml	0
04/07/2015 20:46	AMAR382.9.20150704T204646Z.wav_chan0.xml	0
04/07/2015 20:54	AMAR382.9.20150704T205446Z.wav_chan0.xml	0
04/07/2015 21:02	AMAR382.9.20150704T210246Z.wav_chan0.xml	0
04/07/2015 21:10	AMAR382.9.20150704T211046Z.wav_chan0.xml	0
04/07/2015 21:18	AMAR382.9.20150704T211846Z.wav_chan0.xml	0
04/07/2015 21:26	AMAR382.9.20150704T212646Z.wav_chan0.xml	0
04/07/2015 21:34	AMAR382.9.20150704T213446Z.wav_chan0.xml	0
04/07/2015 21:42	AMAR382.9.20150704T214246Z.wav_chan0.xml	0
04/07/2015 21:50	AMAR382.9.20150704T215046Z.wav_chan0.xml	0
04/07/2015 21:58	AMAR382.9.20150704T215846Z.wav_chan0.xml	0
04/07/2015 22:06	AMAR382.9.20150704T220646Z.wav_chan0.xml	0
04/07/2015 22:14	AMAR382.9.20150704T221446Z.wav_chan0.xml	0
04/07/2015 22:22	AMAR382.9.20150704T222246Z.wav_chan0.xml	0
04/07/2015 22:30	AMAR382.9.20150704T223046Z.wav_chan0.xml	0
04/07/2015 22:38	AMAR382.9.20150704T223846Z.wav_chan0.xml	0
04/07/2015 22:46	AMAR382.9.20150704T224646Z.wav_chan0.xml	0
04/07/2015 22:54	AMAR382.9.20150704T225446Z.wav_chan0.xml	0
04/07/2015 23:02	AMAR382.9.20150704T230246Z.wav_chan0.xml	0
04/07/2015 23:10	AMAR382.9.20150704T231046Z.wav_chan0.xml	0
04/07/2015 23:18	AMAR382.9.20150704T231846Z.wav_chan0.xml	0
04/07/2015 23:26	AMAR382.9.20150704T232646Z.wav_chan0.xml	0
04/07/2015 23:34	AMAR382.9.20150704T233446Z.wav_chan0.xml	0
04/07/2015 23:42	AMAR382.9.20150704T234246Z.wav_chan0.xml	0
04/07/2015 23:50	AMAR382.9.20150704T235046Z.wav_chan0.xml	0
04/07/2015 23:58	AMAR382.9.20150704T235846Z.wav_chan0.xml	0
04/06/2015 0:06	AMAR382.9.20150604T000646Z.wav_chan0.xml	0
04/06/2015 0:14	AMAR382.9.20150604T001446Z.wav_chan0.xml	0
04/06/2015 0:22	AMAR382.9.20150604T002246Z.wav_chan0.xml	0
04/06/2015 0:30	AMAR382.9.20150604T003046Z.wav_chan0.xml	0
04/06/2015 0:38	AMAR382.9.20150604T003846Z.wav_chan0.xml	0
04/06/2015 0:46	AMAR382.9.20150604T004646Z.wav_chan0.xml	0
04/06/2015 0:54	AMAR382.9.20150604T005446Z.wav_chan0.xml	0
04/06/2015 1:02	AMAR382.9.20150604T010246Z.wav_chan0.xml	0
04/06/2015 1:10	AMAR382.9.20150604T011046Z.wav_chan0.xml	0
04/06/2015 1:18	AMAR382.9.20150604T011846Z.wav_chan0.xml	0
04/06/2015 1:26	AMAR382.9.20150604T012646Z.wav_chan0.xml	0
04/06/2015 1:34	AMAR382.9.20150604T013446Z.wav_chan0.xml	0
04/06/2015 1:42	AMAR382.9.20150604T014246Z.wav_chan0.xml	5
04/06/2015 1:50	AMAR382.9.20150604T015046Z.wav_chan0.xml	0
04/06/2015 1:58	AMAR382.9.20150604T015846Z.wav_chan0.xml	0
04/06/2015 2:06	AMAR382.9.20150604T020646Z.wav_chan0.xml	0
04/06/2015 2:14	AMAR382.9.20150604T021446Z.wav_chan0.xml	0
04/06/2015 2:22	AMAR382.9.20150604T022246Z.wav_chan0.xml	0
04/06/2015 2:30	AMAR382.9.20150604T023046Z.wav_chan0.xml	0
[truncated: 17,026 more rows]
