# Supplementary material for: Signals from the deep: Spatial and temporal acoustic occurrence of beaked whales off western Ireland
Source: PLoS One. 2018 Jun 21;13(6):e0199431. doi: 10.1371/journal.pone.0199431 (PMC6013249; doi:10.1371/journal.pone.0199431)
Supplement: S17 Dataset — (CSV) [file pone.0199431.s017.csv]

Time	File	Cuviers	northern bottlenose
20/03/2016 19:37	AMAR375.9.20160320T193724Z.wav_chan0.xml	1	2
20/03/2016 19:51	AMAR375.9.20160320T195151Z.wav_chan0.xml	0	0
20/03/2016 20:06	AMAR375.9.20160320T200618Z.wav_chan0.xml	0	2
20/03/2016 20:20	AMAR375.9.20160320T202045Z.wav_chan0.xml	0	0
20/03/2016 20:35	AMAR375.9.20160320T203512Z.wav_chan0.xml	0	0
20/03/2016 20:49	AMAR375.9.20160320T204939Z.wav_chan0.xml	0	0
20/03/2016 21:04	AMAR375.9.20160320T210406Z.wav_chan0.xml	0	0
20/03/2016 21:18	AMAR375.9.20160320T211833Z.wav_chan0.xml	0	0
20/03/2016 21:33	AMAR375.9.20160320T213300Z.wav_chan0.xml	0	0
20/03/2016 21:47	AMAR375.9.20160320T214727Z.wav_chan0.xml	0	0
20/03/2016 22:01	AMAR375.9.20160320T220154Z.wav_chan0.xml	0	0
20/03/2016 22:16	AMAR375.9.20160320T221621Z.wav_chan0.xml	0	0
20/03/2016 22:30	AMAR375.9.20160320T223048Z.wav_chan0.xml	0	0
20/03/2016 22:45	AMAR375.9.20160320T224515Z.wav_chan0.xml	0	0
20/03/2016 22:59	AMAR375.9.20160320T225942Z.wav_chan0.xml	0	0
20/03/2016 23:14	AMAR375.9.20160320T231409Z.wav_chan0.xml	0	0
20/03/2016 23:28	AMAR375.9.20160320T232836Z.wav_chan0.xml	0	0
20/03/2016 23:43	AMAR375.9.20160320T234303Z.wav_chan0.xml	0	1
20/03/2016 23:57	AMAR375.9.20160320T235730Z.wav_chan0.xml	0	0
21/03/2016 0:11	AMAR375.9.20160321T001157Z.wav_chan0.xml	0	0
21/03/2016 0:26	AMAR375.9.20160321T002624Z.wav_chan0.xml	0	0
21/03/2016 0:40	AMAR375.9.20160321T004051Z.wav_chan0.xml	0	0
21/03/2016 0:55	AMAR375.9.20160321T005518Z.wav_chan0.xml	0	0
21/03/2016 1:09	AMAR375.9.20160321T010945Z.wav_chan0.xml	0	0
21/03/2016 1:24	AMAR375.9.20160321T012412Z.wav_chan0.xml	0	0
21/03/2016 1:38	AMAR375.9.20160321T013839Z.wav_chan0.xml	0	0
21/03/2016 1:53	AMAR375.9.20160321T015306Z.wav_chan0.xml	0	0
21/03/2016 2:07	AMAR375.9.20160321T020733Z.wav_chan0.xml	0	0
21/03/2016 2:22	AMAR375.9.20160321T022200Z.wav_chan0.xml	0	0
21/03/2016 2:36	AMAR375.9.20160321T023627Z.wav_chan0.xml	0	0
21/03/2016 2:50	AMAR375.9.20160321T025054Z.wav_chan0.xml	0	0
21/03/2016 3:05	AMAR375.9.20160321T030521Z.wav_chan0.xml	0	0
21/03/2016 3:19	AMAR375.9.20160321T031948Z.wav_chan0.xml	0	0
21/03/2016 3:34	AMAR375.9.20160321T033415Z.wav_chan0.xml	0	0
21/03/2016 3:48	AMAR375.9.20160321T034842Z.wav_chan0.xml	0	0
21/03/2016 4:03	AMAR375.9.20160321T040309Z.wav_chan0.xml	0	0
21/03/2016 4:17	AMAR375.9.20160321T041736Z.wav_chan0.xml	0	0
21/03/2016 4:32	AMAR375.9.20160321T043203Z.wav_chan0.xml	0	0
21/03/2016 4:46	AMAR375.9.20160321T044630Z.wav_chan0.xml	0	0
21/03/2016 5:00	AMAR375.9.20160321T050057Z.wav_chan0.xml	0	0
21/03/2016 5:15	AMAR375.9.20160321T051524Z.wav_chan0.xml	0	0
21/03/2016 5:29	AMAR375.9.20160321T052951Z.wav_chan0.xml	0	0
21/03/2016 5:44	AMAR375.9.20160321T054418Z.wav_chan0.xml	0	0
21/03/2016 5:58	AMAR375.9.20160321T055845Z.wav_chan0.xml	0	0
21/03/2016 6:13	AMAR375.9.20160321T061312Z.wav_chan0.xml	0	0
21/03/2016 6:27	AMAR375.9.20160321T062739Z.wav_chan0.xml	0	0
21/03/2016 6:42	AMAR375.9.20160321T064206Z.wav_chan0.xml	0	0
21/03/2016 6:56	AMAR375.9.20160321T065633Z.wav_chan0.xml	0	0
21/03/2016 7:11	AMAR375.9.20160321T071100Z.wav_chan0.xml	0	0
21/03/2016 7:25	AMAR375.9.20160321T072527Z.wav_chan0.xml	0	0
21/03/2016 7:39	AMAR375.9.20160321T073954Z.wav_chan0.xml	0	0
21/03/2016 7:54	AMAR375.9.20160321T075421Z.wav_chan0.xml	0	0
21/03/2016 8:08	AMAR375.9.20160321T080848Z.wav_chan0.xml	0	0
21/03/2016 8:23	AMAR375.9.20160321T082315Z.wav_chan0.xml	0	0
21/03/2016 8:37	AMAR375.9.20160321T083742Z.wav_chan0.xml	0	0
21/03/2016 8:52	AMAR375.9.20160321T085209Z.wav_chan0.xml	0	2
21/03/2016 9:06	AMAR375.9.20160321T090636Z.wav_chan0.xml	0	0
21/03/2016 9:21	AMAR375.9.20160321T092103Z.wav_chan0.xml	0	0
21/03/2016 9:35	AMAR375.9.20160321T093530Z.wav_chan0.xml	0	0
21/03/2016 9:49	AMAR375.9.20160321T094957Z.wav_chan0.xml	0	0
21/03/2016 10:04	AMAR375.9.20160321T100424Z.wav_chan0.xml	0	0
21/03/2016 10:18	AMAR375.9.20160321T101851Z.wav_chan0.xml	0	0
21/03/2016 10:33	AMAR375.9.20160321T103318Z.wav_chan0.xml	0	0
21/03/2016 10:47	AMAR375.9.20160321T104745Z.wav_chan0.xml	0	0
21/03/2016 11:02	AMAR375.9.20160321T110212Z.wav_chan0.xml	0	0
21/03/2016 11:16	AMAR375.9.20160321T111639Z.wav_chan0.xml	0	0
21/03/2016 11:31	AMAR375.9.20160321T113106Z.wav_chan0.xml	0	0
21/03/2016 11:45	AMAR375.9.20160321T114533Z.wav_chan0.xml	0	0
21/03/2016 12:00	AMAR375.9.20160321T120000Z.wav_chan0.xml	0	0
21/03/2016 12:14	AMAR375.9.20160321T121427Z.wav_chan0.xml	0	2
21/03/2016 12:28	AMAR375.9.20160321T122854Z.wav_chan0.xml	0	0
21/03/2016 12:43	AMAR375.9.20160321T124321Z.wav_chan0.xml	0	0
21/03/2016 12:57	AMAR375.9.20160321T125748Z.wav_chan0.xml	0	0
21/03/2016 13:12	AMAR375.9.20160321T131215Z.wav_chan0.xml	0	0
21/03/2016 13:26	AMAR375.9.20160321T132642Z.wav_chan0.xml	0	0
21/03/2016 13:41	AMAR375.9.20160321T134109Z.wav_chan0.xml	0	0
21/03/2016 13:55	AMAR375.9.20160321T135536Z.wav_chan0.xml	0	0
21/03/2016 14:10	AMAR375.9.20160321T141003Z.wav_chan0.xml	0	0
21/03/2016 14:24	AMAR375.9.20160321T142430Z.wav_chan0.xml	0	0
21/03/2016 14:38	AMAR375.9.20160321T143857Z.wav_chan0.xml	0	0
21/03/2016 14:53	AMAR375.9.20160321T145324Z.wav_chan0.xml	0	0
21/03/2016 15:07	AMAR375.9.20160321T150751Z.wav_chan0.xml	0	0
21/03/2016 15:22	AMAR375.9.20160321T152218Z.wav_chan0.xml	0	0
21/03/2016 15:36	AMAR375.9.20160321T153645Z.wav_chan0.xml	0	0
21/03/2016 15:51	AMAR375.9.20160321T155112Z.wav_chan0.xml	0	0
21/03/2016 16:05	AMAR375.9.20160321T160539Z.wav_chan0.xml	0	0
21/03/2016 16:20	AMAR375.9.20160321T162006Z.wav_chan0.xml	0	0
21/03/2016 16:34	AMAR375.9.20160321T163433Z.wav_chan0.xml	0	0
21/03/2016 16:49	AMAR375.9.20160321T164900Z.wav_chan0.xml	0	0
21/03/2016 17:03	AMAR375.9.20160321T170327Z.wav_chan0.xml	0	0
21/03/2016 17:17	AMAR375.9.20160321T171754Z.wav_chan0.xml	0	0
21/03/2016 17:32	AMAR375.9.20160321T173221Z.wav_chan0.xml	0	0
21/03/2016 17:46	AMAR375.9.20160321T174648Z.wav_chan0.xml	0	0
21/03/2016 18:01	AMAR375.9.20160321T180115Z.wav_chan0.xml	0	0
21/03/2016 18:15	AMAR375.9.20160321T181542Z.wav_chan0.xml	0	0
21/03/2016 18:30	AMAR375.9.20160321T183009Z.wav_chan0.xml	0	0
21/03/2016 18:44	AMAR375.9.20160321T184436Z.wav_chan0.xml	0	0
21/03/2016 18:59	AMAR375.9.20160321T185903Z.wav_chan0.xml	0	0
21/03/2016 19:13	AMAR375.9.20160321T191330Z.wav_chan0.xml	0	0
21/03/2016 19:27	AMAR375.9.20160321T192757Z.wav_chan0.xml	0	0
21/03/2016 19:42	AMAR375.9.20160321T194224Z.wav_chan0.xml	0	0
21/03/2016 19:56	AMAR375.9.20160321T195651Z.wav_chan0.xml	0	0
21/03/2016 20:11	AMAR375.9.20160321T201118Z.wav_chan0.xml	0	0
21/03/2016 20:25	AMAR375.9.20160321T202545Z.wav_chan0.xml	0	0
21/03/2016 20:40	AMAR375.9.20160321T204012Z.wav_chan0.xml	0	0
21/03/2016 20:54	AMAR375.9.20160321T205439Z.wav_chan0.xml	0	0
21/03/2016 21:09	AMAR375.9.20160321T210906Z.wav_chan0.xml	0	0
21/03/2016 21:23	AMAR375.9.20160321T212333Z.wav_chan0.xml	0	0
21/03/2016 21:38	AMAR375.9.20160321T213800Z.wav_chan0.xml	0	0
21/03/2016 21:52	AMAR375.9.20160321T215227Z.wav_chan0.xml	0	0
21/03/2016 22:06	AMAR375.9.20160321T220654Z.wav_chan0.xml	0	0
21/03/2016 22:21	AMAR375.9.20160321T222121Z.wav_chan0.xml	0	0
21/03/2016 22:35	AMAR375.9.20160321T223548Z.wav_chan0.xml	0	0
21/03/2016 22:50	AMAR375.9.20160321T225015Z.wav_chan0.xml	0	0
21/03/2016 23:04	AMAR375.9.20160321T230442Z.wav_chan0.xml	0	0
21/03/2016 23:19	AMAR375.9.20160321T231909Z.wav_chan0.xml	0	0
21/03/2016 23:33	AMAR375.9.20160321T233336Z.wav_chan0.xml	0	0
21/03/2016 23:48	AMAR375.9.20160321T234803Z.wav_chan0.xml	0	0
22/03/2016 0:02	AMAR375.9.20160322T000230Z.wav_chan0.xml	0	0
22/03/2016 0:16	AMAR375.9.20160322T001657Z.wav_chan0.xml	0	0
22/03/2016 0:31	AMAR375.9.20160322T003124Z.wav_chan0.xml	0	0
22/03/2016 0:45	AMAR375.9.20160322T004551Z.wav_chan0.xml	0	0
22/03/2016 1:00	AMAR375.9.20160322T010018Z.wav_chan0.xml	0	0
22/03/2016 1:14	AMAR375.9.20160322T011445Z.wav_chan0.xml	0	0
22/03/2016 1:29	AMAR375.9.20160322T012912Z.wav_chan0.xml	0	0
22/03/2016 1:43	AMAR375.9.20160322T014339Z.wav_chan0.xml	0	0
22/03/2016 1:58	AMAR375.9.20160322T015806Z.wav_chan0.xml	0	0
22/03/2016 2:12	AMAR375.9.20160322T021233Z.wav_chan0.xml	0	0
22/03/2016 2:27	AMAR375.9.20160322T022700Z.wav_chan0.xml	0	0
22/03/2016 2:41	AMAR375.9.20160322T024127Z.wav_chan0.xml	0	0
22/03/2016 2:55	AMAR375.9.20160322T025554Z.wav_chan0.xml	0	0
22/03/2016 3:10	AMAR375.9.20160322T031021Z.wav_chan0.xml	0	0
22/03/2016 3:24	AMAR375.9.20160322T032448Z.wav_chan0.xml	0	0
22/03/2016 3:39	AMAR375.9.20160322T033915Z.wav_chan0.xml	0	0
22/03/2016 3:53	AMAR375.9.20160322T035342Z.wav_chan0.xml	0	0
22/03/2016 4:08	AMAR375.9.20160322T040809Z.wav_chan0.xml	0	0
22/03/2016 4:22	AMAR375.9.20160322T042236Z.wav_chan0.xml	0	0
22/03/2016 4:37	AMAR375.9.20160322T043703Z.wav_chan0.xml	0	0
22/03/2016 4:51	AMAR375.9.20160322T045130Z.wav_chan0.xml	0	0
22/03/2016 5:05	AMAR375.9.20160322T050557Z.wav_chan0.xml	0	0
22/03/2016 5:20	AMAR375.9.20160322T052024Z.wav_chan0.xml	0	0
22/03/2016 5:34	AMAR375.9.20160322T053451Z.wav_chan0.xml	0	0
22/03/2016 5:49	AMAR375.9.20160322T054918Z.wav_chan0.xml	0	0
22/03/2016 6:03	AMAR375.9.20160322T060345Z.wav_chan0.xml	0	0
22/03/2016 6:18	AMAR375.9.20160322T061812Z.wav_chan0.xml	0	0
22/03/2016 6:32	AMAR375.9.20160322T063239Z.wav_chan0.xml	0	0
22/03/2016 6:47	AMAR375.9.20160322T064706Z.wav_chan0.xml	0	0
22/03/2016 7:01	AMAR375.9.20160322T070133Z.wav_chan0.xml	0	0
22/03/2016 7:16	AMAR375.9.20160322T071600Z.wav_chan0.xml	0	0
22/03/2016 7:30	AMAR375.9.20160322T073027Z.wav_chan0.xml	0	0
22/03/2016 7:44	AMAR375.9.20160322T074454Z.wav_chan0.xml	0	0
22/03/2016 7:59	AMAR375.9.20160322T075921Z.wav_chan0.xml	0	0
22/03/2016 8:13	AMAR375.9.20160322T081348Z.wav_chan0.xml	0	0
22/03/2016 8:28	AMAR375.9.20160322T082815Z.wav_chan0.xml	0	0
22/03/2016 8:42	AMAR375.9.20160322T084242Z.wav_chan0.xml	0	0
22/03/2016 8:57	AMAR375.9.20160322T085709Z.wav_chan0.xml	0	0
22/03/2016 9:11	AMAR375.9.20160322T091136Z.wav_chan0.xml	0	0
22/03/2016 9:26	AMAR375.9.20160322T092603Z.wav_chan0.xml	0	0
22/03/2016 9:40	AMAR375.9.20160322T094030Z.wav_chan0.xml	0	0
22/03/2016 9:54	AMAR375.9.20160322T095457Z.wav_chan0.xml	0	0
22/03/2016 10:09	AMAR375.9.20160322T100924Z.wav_chan0.xml	0	0
22/03/2016 10:23	AMAR375.9.20160322T102351Z.wav_chan0.xml	0	0
22/03/2016 10:38	AMAR375.9.20160322T103818Z.wav_chan0.xml	0	0
22/03/2016 10:52	AMAR375.9.20160322T105245Z.wav_chan0.xml	0	0
22/03/2016 11:07	AMAR375.9.20160322T110712Z.wav_chan0.xml	0	0
22/03/2016 11:21	AMAR375.9.20160322T112139Z.wav_chan0.xml	0	0
22/03/2016 11:36	AMAR375.9.20160322T113606Z.wav_chan0.xml	0	0
22/03/2016 11:50	AMAR375.9.20160322T115033Z.wav_chan0.xml	0	0
22/03/2016 12:05	AMAR375.9.20160322T120500Z.wav_chan0.xml	0	0
22/03/2016 12:19	AMAR375.9.20160322T121927Z.wav_chan0.xml	0	0
22/03/2016 12:33	AMAR375.9.20160322T123354Z.wav_chan0.xml	0	0
22/03/2016 12:48	AMAR375.9.20160322T124821Z.wav_chan0.xml	0	0
22/03/2016 13:02	AMAR375.9.20160322T130248Z.wav_chan0.xml	0	0
22/03/2016 13:17	AMAR375.9.20160322T131715Z.wav_chan0.xml	0	0
22/03/2016 13:31	AMAR375.9.20160322T133142Z.wav_chan0.xml	0	0
22/03/2016 13:46	AMAR375.9.20160322T134609Z.wav_chan0.xml	0	0
22/03/2016 14:00	AMAR375.9.20160322T140036Z.wav_chan0.xml	0	0
22/03/2016 14:15	AMAR375.9.20160322T141503Z.wav_chan0.xml	0	0
22/03/2016 14:29	AMAR375.9.20160322T142930Z.wav_chan0.xml	0	0
22/03/2016 14:43	AMAR375.9.20160322T144357Z.wav_chan0.xml	0	0
22/03/2016 14:58	AMAR375.9.20160322T145824Z.wav_chan0.xml	0	0
22/03/2016 15:12	AMAR375.9.20160322T151251Z.wav_chan0.xml	0	0
22/03/2016 15:27	AMAR375.9.20160322T152718Z.wav_chan0.xml	0	0
22/03/2016 15:41	AMAR375.9.20160322T154145Z.wav_chan0.xml	0	0
22/03/2016 15:56	AMAR375.9.20160322T155612Z.wav_chan0.xml	0	0
22/03/2016 16:10	AMAR375.9.20160322T161039Z.wav_chan0.xml	0	0
22/03/2016 16:25	AMAR375.9.20160322T162506Z.wav_chan0.xml	0	0
22/03/2016 16:39	AMAR375.9.20160322T163933Z.wav_chan0.xml	0	0
22/03/2016 16:54	AMAR375.9.20160322T165400Z.wav_chan0.xml	0	0
22/03/2016 17:08	AMAR375.9.20160322T170827Z.wav_chan0.xml	0	0
22/03/2016 17:22	AMAR375.9.20160322T172254Z.wav_chan0.xml	0	0
22/03/2016 17:37	AMAR375.9.20160322T173721Z.wav_chan0.xml	0	0
22/03/2016 17:51	AMAR375.9.20160322T175148Z.wav_chan0.xml	0	0
22/03/2016 18:06	AMAR375.9.20160322T180615Z.wav_chan0.xml	0	0
22/03/2016 18:20	AMAR375.9.20160322T182042Z.wav_chan0.xml	0	0
22/03/2016 18:35	AMAR375.9.20160322T183509Z.wav_chan0.xml	0	0
22/03/2016 18:49	AMAR375.9.20160322T184936Z.wav_chan0.xml	0	0
22/03/2016 19:04	AMAR375.9.20160322T190403Z.wav_chan0.xml	0	0
22/03/2016 19:18	AMAR375.9.20160322T191830Z.wav_chan0.xml	0	0
22/03/2016 19:32	AMAR375.9.20160322T193257Z.wav_chan0.xml	0	0
22/03/2016 19:47	AMAR375.9.20160322T194724Z.wav_chan0.xml	0	0
22/03/2016 20:01	AMAR375.9.20160322T200151Z.wav_chan0.xml	0	0
22/03/2016 20:16	AMAR375.9.20160322T201618Z.wav_chan0.xml	0	0
22/03/2016 20:30	AMAR375.9.20160322T203045Z.wav_chan0.xml	0	0
22/03/2016 20:45	AMAR375.9.20160322T204512Z.wav_chan0.xml	0	0
22/03/2016 20:59	AMAR375.9.20160322T205939Z.wav_chan0.xml	0	0
22/03/2016 21:14	AMAR375.9.20160322T211406Z.wav_chan0.xml	0	0
22/03/2016 21:28	AMAR375.9.20160322T212833Z.wav_chan0.xml	0	0
22/03/2016 21:43	AMAR375.9.20160322T214300Z.wav_chan0.xml	0	0
22/03/2016 21:57	AMAR375.9.20160322T215727Z.wav_chan0.xml	0	0
22/03/2016 22:11	AMAR375.9.20160322T221154Z.wav_chan0.xml	0	0
22/03/2016 22:26	AMAR375.9.20160322T222621Z.wav_chan0.xml	0	0
22/03/2016 22:40	AMAR375.9.20160322T224048Z.wav_chan0.xml	0	0
22/03/2016 22:55	AMAR375.9.20160322T225515Z.wav_chan0.xml	0	0
22/03/2016 23:09	AMAR375.9.20160322T230942Z.wav_chan0.xml	0	0
22/03/2016 23:24	AMAR375.9.20160322T232409Z.wav_chan0.xml	0	0
22/03/2016 23:38	AMAR375.9.20160322T233836Z.wav_chan0.xml	0	0
22/03/2016 23:53	AMAR375.9.20160322T235303Z.wav_chan0.xml	0	0
23/03/2016 0:07	AMAR375.9.20160323T000730Z.wav_chan0.xml	0	0
23/03/2016 0:21	AMAR375.9.20160323T002157Z.wav_chan0.xml	0	0
23/03/2016 0:36	AMAR375.9.20160323T003624Z.wav_chan0.xml	0	0
23/03/2016 0:50	AMAR375.9.20160323T005051Z.wav_chan0.xml	0	0
23/03/2016 1:05	AMAR375.9.20160323T010518Z.wav_chan0.xml	0	0
23/03/2016 1:19	AMAR375.9.20160323T011945Z.wav_chan0.xml	0	0
23/03/2016 1:34	AMAR375.9.20160323T013412Z.wav_chan0.xml	0	0
23/03/2016 1:48	AMAR375.9.20160323T014839Z.wav_chan0.xml	0	0
23/03/2016 2:03	AMAR375.9.20160323T020306Z.wav_chan0.xml	0	0
23/03/2016 2:17	AMAR375.9.20160323T021733Z.wav_chan0.xml	0	0
23/03/2016 2:32	AMAR375.9.20160323T023200Z.wav_chan0.xml	0	0
23/03/2016 2:46	AMAR375.9.20160323T024627Z.wav_chan0.xml	0	0
23/03/2016 3:00	AMAR375.9.20160323T030054Z.wav_chan0.xml	0	0
23/03/2016 3:15	AMAR375.9.20160323T031521Z.wav_chan0.xml	0	0
23/03/2016 3:29	AMAR375.9.20160323T032948Z.wav_chan0.xml	0	0
23/03/2016 3:44	AMAR375.9.20160323T034415Z.wav_chan0.xml	2	0
23/03/2016 3:58	AMAR375.9.20160323T035842Z.wav_chan0.xml	0	0
23/03/2016 4:13	AMAR375.9.20160323T041309Z.wav_chan0.xml	0	0
23/03/2016 4:27	AMAR375.9.20160323T042736Z.wav_chan0.xml	0	0
23/03/2016 4:42	AMAR375.9.20160323T044203Z.wav_chan0.xml	0	0
23/03/2016 4:56	AMAR375.9.20160323T045630Z.wav_chan0.xml	0	0
23/03/2016 5:10	AMAR375.9.20160323T051057Z.wav_chan0.xml	0	0
23/03/2016 5:25	AMAR375.9.20160323T052524Z.wav_chan0.xml	0	0
23/03/2016 5:39	AMAR375.9.20160323T053951Z.wav_chan0.xml	0	0
23/03/2016 5:54	AMAR375.9.20160323T055418Z.wav_chan0.xml	0	0
23/03/2016 6:08	AMAR375.9.20160323T060845Z.wav_chan0.xml	0	0
23/03/2016 6:23	AMAR375.9.20160323T062312Z.wav_chan0.xml	0	0
23/03/2016 6:37	AMAR375.9.20160323T063739Z.wav_chan0.xml	0	0
23/03/2016 6:52	AMAR375.9.20160323T065206Z.wav_chan0.xml	0	0
23/03/2016 7:06	AMAR375.9.20160323T070633Z.wav_chan0.xml	0	0
23/03/2016 7:21	AMAR375.9.20160323T072100Z.wav_chan0.xml	0	0
23/03/2016 7:35	AMAR375.9.20160323T073527Z.wav_chan0.xml	0	0
23/03/2016 7:49	AMAR375.9.20160323T074954Z.wav_chan0.xml	0	0
23/03/2016 8:04	AMAR375.9.20160323T080421Z.wav_chan0.xml	0	0
23/03/2016 8:18	AMAR375.9.20160323T081848Z.wav_chan0.xml	0	0
23/03/2016 8:33	AMAR375.9.20160323T083315Z.wav_chan0.xml	0	0
23/03/2016 8:47	AMAR375.9.20160323T084742Z.wav_chan0.xml	0	0
23/03/2016 9:02	AMAR375.9.20160323T090209Z.wav_chan0.xml	0	0
23/03/2016 9:16	AMAR375.9.20160323T091636Z.wav_chan0.xml	0	0
23/03/2016 9:31	AMAR375.9.20160323T093103Z.wav_chan0.xml	0	0
23/03/2016 9:45	AMAR375.9.20160323T094530Z.wav_chan0.xml	0	0
23/03/2016 9:59	AMAR375.9.20160323T095957Z.wav_chan0.xml	0	0
23/03/2016 10:14	AMAR375.9.20160323T101424Z.wav_chan0.xml	0	0
23/03/2016 10:28	AMAR375.9.20160323T102851Z.wav_chan0.xml	0	0
23/03/2016 10:43	AMAR375.9.20160323T104318Z.wav_chan0.xml	0	0
23/03/2016 10:57	AMAR375.9.20160323T105745Z.wav_chan0.xml	0	0
23/03/2016 11:12	AMAR375.9.20160323T111212Z.wav_chan0.xml	0	0
23/03/2016 11:26	AMAR375.9.20160323T112639Z.wav_chan0.xml	0	0
23/03/2016 11:41	AMAR375.9.20160323T114106Z.wav_chan0.xml	0	0
23/03/2016 11:55	AMAR375.9.20160323T115533Z.wav_chan0.xml	0	0
23/03/2016 12:10	AMAR375.9.20160323T121000Z.wav_chan0.xml	0	0
23/03/2016 12:24	AMAR375.9.20160323T122427Z.wav_chan0.xml	0	0
23/03/2016 12:38	AMAR375.9.20160323T123854Z.wav_chan0.xml	1	0
23/03/2016 12:53	AMAR375.9.20160323T125321Z.wav_chan0.xml	0	0
23/03/2016 13:07	AMAR375.9.20160323T130748Z.wav_chan0.xml	0	0
23/03/2016 13:22	AMAR375.9.20160323T132215Z.wav_chan0.xml	0	0
23/03/2016 13:36	AMAR375.9.20160323T133642Z.wav_chan0.xml	0	0
23/03/2016 13:51	AMAR375.9.20160323T135109Z.wav_chan0.xml	0	0
23/03/2016 14:05	AMAR375.9.20160323T140536Z.wav_chan0.xml	4	0
23/03/2016 14:20	AMAR375.9.20160323T142003Z.wav_chan0.xml	0	0
23/03/2016 14:34	AMAR375.9.20160323T143430Z.wav_chan0.xml	0	0
23/03/2016 14:48	AMAR375.9.20160323T144857Z.wav_chan0.xml	0	0
23/03/2016 15:03	AMAR375.9.20160323T150324Z.wav_chan0.xml	0	0
23/03/2016 15:17	AMAR375.9.20160323T151751Z.wav_chan0.xml	0	0
23/03/2016 15:32	AMAR375.9.20160323T153218Z.wav_chan0.xml	0	0
23/03/2016 15:46	AMAR375.9.20160323T154645Z.wav_chan0.xml	0	0
23/03/2016 16:01	AMAR375.9.20160323T160112Z.wav_chan0.xml	0	0
23/03/2016 16:15	AMAR375.9.20160323T161539Z.wav_chan0.xml	0	0
23/03/2016 16:30	AMAR375.9.20160323T163006Z.wav_chan0.xml	0	0
23/03/2016 16:44	AMAR375.9.20160323T164433Z.wav_chan0.xml	0	0
23/03/2016 16:59	AMAR375.9.20160323T165900Z.wav_chan0.xml	0	0
23/03/2016 17:13	AMAR375.9.20160323T171327Z.wav_chan0.xml	0	0
23/03/2016 17:27	AMAR375.9.20160323T172754Z.wav_chan0.xml	0	0
23/03/2016 17:42	AMAR375.9.20160323T174221Z.wav_chan0.xml	1	0
23/03/2016 17:56	AMAR375.9.20160323T175648Z.wav_chan0.xml	0	0
23/03/2016 18:11	AMAR375.9.20160323T181115Z.wav_chan0.xml	0	0
23/03/2016 18:25	AMAR375.9.20160323T182542Z.wav_chan0.xml	0	0
23/03/2016 18:40	AMAR375.9.20160323T184009Z.wav_chan0.xml	0	0
23/03/2016 18:54	AMAR375.9.20160323T185436Z.wav_chan0.xml	0	0
23/03/2016 19:09	AMAR375.9.20160323T190903Z.wav_chan0.xml	0	0
23/03/2016 19:23	AMAR375.9.20160323T192330Z.wav_chan0.xml	0	0
23/03/2016 19:37	AMAR375.9.20160323T193757Z.wav_chan0.xml	0	0
23/03/2016 19:52	AMAR375.9.20160323T195224Z.wav_chan0.xml	0	0
23/03/2016 20:06	AMAR375.9.20160323T200651Z.wav_chan0.xml	0	0
23/03/2016 20:21	AMAR375.9.20160323T202118Z.wav_chan0.xml	0	0
23/03/2016 20:35	AMAR375.9.20160323T203545Z.wav_chan0.xml	0	0
23/03/2016 20:50	AMAR375.9.20160323T205012Z.wav_chan0.xml	0	0
23/03/2016 21:04	AMAR375.9.20160323T210439Z.wav_chan0.xml	0	0
23/03/2016 21:19	AMAR375.9.20160323T211906Z.wav_chan0.xml	0	0
23/03/2016 21:33	AMAR375.9.20160323T213333Z.wav_chan0.xml	0	0
23/03/2016 21:48	AMAR375.9.20160323T214800Z.wav_chan0.xml	0	0
23/03/2016 22:02	AMAR375.9.20160323T220227Z.wav_chan0.xml	0	0
23/03/2016 22:16	AMAR375.9.20160323T221654Z.wav_chan0.xml	0	0
23/03/2016 22:31	AMAR375.9.20160323T223121Z.wav_chan0.xml	1	0
23/03/2016 22:45	AMAR375.9.20160323T224548Z.wav_chan0.xml	0	0
23/03/2016 23:00	AMAR375.9.20160323T230015Z.wav_chan0.xml	0	0
23/03/2016 23:14	AMAR375.9.20160323T231442Z.wav_chan0.xml	2	0
23/03/2016 23:29	AMAR375.9.20160323T232909Z.wav_chan0.xml	0	0
23/03/2016 23:43	AMAR375.9.20160323T234336Z.wav_chan0.xml	0	0
23/03/2016 23:58	AMAR375.9.20160323T235803Z.wav_chan0.xml	0	0
24/03/2016 0:12	AMAR375.9.20160324T001230Z.wav_chan0.xml	0	0
24/03/2016 0:26	AMAR375.9.20160324T002657Z.wav_chan0.xml	1	0
24/03/2016 0:41	AMAR375.9.20160324T004124Z.wav_chan0.xml	0	0
24/03/2016 0:55	AMAR375.9.20160324T005551Z.wav_chan0.xml	0	0
24/03/2016 1:10	AMAR375.9.20160324T011018Z.wav_chan0.xml	0	0
24/03/2016 1:24	AMAR375.9.20160324T012445Z.wav_chan0.xml	0	0
24/03/2016 1:39	AMAR375.9.20160324T013912Z.wav_chan0.xml	1	0
24/03/2016 1:53	AMAR375.9.20160324T015339Z.wav_chan0.xml	1	0
24/03/2016 2:08	AMAR375.9.20160324T020806Z.wav_chan0.xml	1	0
24/03/2016 2:22	AMAR375.9.20160324T022233Z.wav_chan0.xml	0	0
24/03/2016 2:37	AMAR375.9.20160324T023700Z.wav_chan0.xml	0	0
24/03/2016 2:51	AMAR375.9.20160324T025127Z.wav_chan0.xml	0	0
24/03/2016 3:05	AMAR375.9.20160324T030554Z.wav_chan0.xml	0	0
24/03/2016 3:20	AMAR375.9.20160324T032021Z.wav_chan0.xml	0	0
24/03/2016 3:34	AMAR375.9.20160324T033448Z.wav_chan0.xml	0	0
24/03/2016 3:49	AMAR375.9.20160324T034915Z.wav_chan0.xml	0	0
24/03/2016 4:03	AMAR375.9.20160324T040342Z.wav_chan0.xml	0	0
24/03/2016 4:18	AMAR375.9.20160324T041809Z.wav_chan0.xml	0	0
24/03/2016 4:32	AMAR375.9.20160324T043236Z.wav_chan0.xml	0	0
24/03/2016 4:47	AMAR375.9.20160324T044703Z.wav_chan0.xml	0	0
24/03/2016 5:01	AMAR375.9.20160324T050130Z.wav_chan0.xml	0	0
24/03/2016 5:15	AMAR375.9.20160324T051557Z.wav_chan0.xml	0	0
24/03/2016 5:30	AMAR375.9.20160324T053024Z.wav_chan0.xml	0	0
24/03/2016 5:44	AMAR375.9.20160324T054451Z.wav_chan0.xml	0	0
24/03/2016 5:59	AMAR375.9.20160324T055918Z.wav_chan0.xml	0	0
24/03/2016 6:13	AMAR375.9.20160324T061345Z.wav_chan0.xml	5	0
24/03/2016 6:28	AMAR375.9.20160324T062812Z.wav_chan0.xml	0	0
24/03/2016 6:42	AMAR375.9.20160324T064239Z.wav_chan0.xml	0	0
24/03/2016 6:57	AMAR375.9.20160324T065706Z.wav_chan0.xml	0	0
24/03/2016 7:11	AMAR375.9.20160324T071133Z.wav_chan0.xml	0	0
24/03/2016 7:26	AMAR375.9.20160324T072600Z.wav_chan0.xml	0	0
24/03/2016 7:40	AMAR375.9.20160324T074027Z.wav_chan0.xml	0	0
24/03/2016 7:54	AMAR375.9.20160324T075454Z.wav_chan0.xml	0	0
24/03/2016 8:09	AMAR375.9.20160324T080921Z.wav_chan0.xml	0	0
24/03/2016 8:23	AMAR375.9.20160324T082348Z.wav_chan0.xml	0	0
24/03/2016 8:38	AMAR375.9.20160324T083815Z.wav_chan0.xml	1	0
24/03/2016 8:52	AMAR375.9.20160324T085242Z.wav_chan0.xml	0	0
24/03/2016 9:07	AMAR375.9.20160324T090709Z.wav_chan0.xml	0	0
24/03/2016 9:21	AMAR375.9.20160324T092136Z.wav_chan0.xml	0	0
24/03/2016 9:36	AMAR375.9.20160324T093603Z.wav_chan0.xml	0	0
24/03/2016 9:50	AMAR375.9.20160324T095030Z.wav_chan0.xml	0	0
24/03/2016 10:04	AMAR375.9.20160324T100457Z.wav_chan0.xml	0	0
24/03/2016 10:19	AMAR375.9.20160324T101924Z.wav_chan0.xml	0	0
24/03/2016 10:33	AMAR375.9.20160324T103351Z.wav_chan0.xml	0	0
24/03/2016 10:48	AMAR375.9.20160324T104818Z.wav_chan0.xml	0	0
24/03/2016 11:02	AMAR375.9.20160324T110245Z.wav_chan0.xml	0	0
24/03/2016 11:17	AMAR375.9.20160324T111712Z.wav_chan0.xml	0	0
24/03/2016 11:31	AMAR375.9.20160324T113139Z.wav_chan0.xml	0	0
24/03/2016 11:46	AMAR375.9.20160324T114606Z.wav_chan0.xml	0	0
24/03/2016 12:00	AMAR375.9.20160324T120033Z.wav_chan0.xml	0	0
24/03/2016 12:15	AMAR375.9.20160324T121500Z.wav_chan0.xml	0	0
24/03/2016 12:29	AMAR375.9.20160324T122927Z.wav_chan0.xml	0	0
24/03/2016 12:43	AMAR375.9.20160324T124354Z.wav_chan0.xml	0	0
24/03/2016 12:58	AMAR375.9.20160324T125821Z.wav_chan0.xml	0	0
24/03/2016 13:12	AMAR375.9.20160324T131248Z.wav_chan0.xml	0	0
24/03/2016 13:27	AMAR375.9.20160324T132715Z.wav_chan0.xml	0	0
24/03/2016 13:41	AMAR375.9.20160324T134142Z.wav_chan0.xml	0	0
24/03/2016 13:56	AMAR375.9.20160324T135609Z.wav_chan0.xml	0	0
24/03/2016 14:10	AMAR375.9.20160324T141036Z.wav_chan0.xml	0	0
24/03/2016 14:25	AMAR375.9.20160324T142503Z.wav_chan0.xml	0	0
24/03/2016 14:39	AMAR375.9.20160324T143930Z.wav_chan0.xml	0	0
24/03/2016 14:53	AMAR375.9.20160324T145357Z.wav_chan0.xml	0	0
24/03/2016 15:08	AMAR375.9.20160324T150824Z.wav_chan0.xml	0	0
24/03/2016 15:22	AMAR375.9.20160324T152251Z.wav_chan0.xml	0	0
24/03/2016 15:37	AMAR375.9.20160324T153718Z.wav_chan0.xml	1	0
24/03/2016 15:51	AMAR375.9.20160324T155145Z.wav_chan0.xml	0	0
24/03/2016 16:06	AMAR375.9.20160324T160612Z.wav_chan0.xml	0	0
24/03/2016 16:20	AMAR375.9.20160324T162039Z.wav_chan0.xml	0	0
24/03/2016 16:35	AMAR375.9.20160324T163506Z.wav_chan0.xml	0	0
24/03/2016 16:49	AMAR375.9.20160324T164933Z.wav_chan0.xml	0	0
24/03/2016 17:04	AMAR375.9.20160324T170400Z.wav_chan0.xml	0	0
24/03/2016 17:18	AMAR375.9.20160324T171827Z.wav_chan0.xml	0	0
24/03/2016 17:32	AMAR375.9.20160324T173254Z.wav_chan0.xml	1	0
24/03/2016 17:47	AMAR375.9.20160324T174721Z.wav_chan0.xml	0	0
24/03/2016 18:01	AMAR375.9.20160324T180148Z.wav_chan0.xml	0	0
24/03/2016 18:16	AMAR375.9.20160324T181615Z.wav_chan0.xml	0	0
24/03/2016 18:30	AMAR375.9.20160324T183042Z.wav_chan0.xml	0	0
24/03/2016 18:45	AMAR375.9.20160324T184509Z.wav_chan0.xml	0	0
24/03/2016 18:59	AMAR375.9.20160324T185936Z.wav_chan0.xml	0	0
24/03/2016 19:14	AMAR375.9.20160324T191403Z.wav_chan0.xml	0	0
24/03/2016 19:28	AMAR375.9.20160324T192830Z.wav_chan0.xml	0	0
24/03/2016 19:42	AMAR375.9.20160324T194257Z.wav_chan0.xml	0	0
24/03/2016 19:57	AMAR375.9.20160324T195724Z.wav_chan0.xml	0	0
24/03/2016 20:11	AMAR375.9.20160324T201151Z.wav_chan0.xml	0	0
24/03/2016 20:26	AMAR375.9.20160324T202618Z.wav_chan0.xml	0	0
24/03/2016 20:40	AMAR375.9.20160324T204045Z.wav_chan0.xml	0	0
24/03/2016 20:55	AMAR375.9.20160324T205512Z.wav_chan0.xml	0	0
24/03/2016 21:09	AMAR375.9.20160324T210939Z.wav_chan0.xml	0	0
24/03/2016 21:24	AMAR375.9.20160324T212406Z.wav_chan0.xml	0	0
24/03/2016 21:38	AMAR375.9.20160324T213833Z.wav_chan0.xml	0	0
24/03/2016 21:53	AMAR375.9.20160324T215300Z.wav_chan0.xml	0	0
24/03/2016 22:07	AMAR375.9.20160324T220727Z.wav_chan0.xml	2	0
24/03/2016 22:21	AMAR375.9.20160324T222154Z.wav_chan0.xml	0	0
24/03/2016 22:36	AMAR375.9.20160324T223621Z.wav_chan0.xml	0	0
24/03/2016 22:50	AMAR375.9.20160324T225048Z.wav_chan0.xml	0	0
24/03/2016 23:05	AMAR375.9.20160324T230515Z.wav_chan0.xml	0	0
24/03/2016 23:19	AMAR375.9.20160324T231942Z.wav_chan0.xml	0	0
24/03/2016 23:34	AMAR375.9.20160324T233409Z.wav_chan0.xml	0	0
24/03/2016 23:48	AMAR375.9.20160324T234836Z.wav_chan0.xml	0	0
25/03/2016 0:03	AMAR375.9.20160325T000303Z.wav_chan0.xml	0	0
25/03/2016 0:17	AMAR375.9.20160325T001730Z.wav_chan0.xml	0	0
25/03/2016 0:31	AMAR375.9.20160325T003157Z.wav_chan0.xml	0	0
25/03/2016 0:46	AMAR375.9.20160325T004624Z.wav_chan0.xml	0	0
25/03/2016 1:00	AMAR375.9.20160325T010051Z.wav_chan0.xml	0	0
25/03/2016 1:15	AMAR375.9.20160325T011518Z.wav_chan0.xml	0	0
25/03/2016 1:29	AMAR375.9.20160325T012945Z.wav_chan0.xml	0	0
25/03/2016 1:44	AMAR375.9.20160325T014412Z.wav_chan0.xml	0	0
25/03/2016 1:58	AMAR375.9.20160325T015839Z.wav_chan0.xml	0	0
25/03/2016 2:13	AMAR375.9.20160325T021306Z.wav_chan0.xml	0	0
25/03/2016 2:27	AMAR375.9.20160325T022733Z.wav_chan0.xml	1	0
25/03/2016 2:42	AMAR375.9.20160325T024200Z.wav_chan0.xml	0	0
25/03/2016 2:56	AMAR375.9.20160325T025627Z.wav_chan0.xml	0	0
25/03/2016 3:10	AMAR375.9.20160325T031054Z.wav_chan0.xml	0	0
25/03/2016 3:25	AMAR375.9.20160325T032521Z.wav_chan0.xml	0	0
25/03/2016 3:39	AMAR375.9.20160325T033948Z.wav_chan0.xml	0	0
25/03/2016 3:54	AMAR375.9.20160325T035415Z.wav_chan0.xml	0	0
25/03/2016 4:08	AMAR375.9.20160325T040842Z.wav_chan0.xml	0	0
25/03/2016 4:23	AMAR375.9.20160325T042309Z.wav_chan0.xml	0	0
25/03/2016 4:37	AMAR375.9.20160325T043736Z.wav_chan0.xml	0	0
25/03/2016 4:52	AMAR375.9.20160325T045203Z.wav_chan0.xml	0	0
25/03/2016 5:06	AMAR375.9.20160325T050630Z.wav_chan0.xml	1	0
25/03/2016 5:20	AMAR375.9.20160325T052057Z.wav_chan0.xml	0	0
25/03/2016 5:35	AMAR375.9.20160325T053524Z.wav_chan0.xml	0	0
25/03/2016 5:49	AMAR375.9.20160325T054951Z.wav_chan0.xml	0	0
25/03/2016 6:04	AMAR375.9.20160325T060418Z.wav_chan0.xml	0	0
25/03/2016 6:18	AMAR375.9.20160325T061845Z.wav_chan0.xml	0	0
25/03/2016 6:33	AMAR375.9.20160325T063312Z.wav_chan0.xml	2	0
25/03/2016 6:47	AMAR375.9.20160325T064739Z.wav_chan0.xml	0	0
25/03/2016 7:02	AMAR375.9.20160325T070206Z.wav_chan0.xml	0	0
25/03/2016 7:16	AMAR375.9.20160325T071633Z.wav_chan0.xml	0	0
25/03/2016 7:31	AMAR375.9.20160325T073100Z.wav_chan0.xml	0	0
25/03/2016 7:45	AMAR375.9.20160325T074527Z.wav_chan0.xml	0	0
25/03/2016 7:59	AMAR375.9.20160325T075954Z.wav_chan0.xml	0	0
25/03/2016 8:14	AMAR375.9.20160325T081421Z.wav_chan0.xml	0	0
25/03/2016 8:28	AMAR375.9.20160325T082848Z.wav_chan0.xml	5	0
25/03/2016 8:43	AMAR375.9.20160325T084315Z.wav_chan0.xml	0	0
25/03/2016 8:57	AMAR375.9.20160325T085742Z.wav_chan0.xml	0	0
25/03/2016 9:12	AMAR375.9.20160325T091209Z.wav_chan0.xml	0	0
25/03/2016 9:26	AMAR375.9.20160325T092636Z.wav_chan0.xml	0	0
25/03/2016 9:41	AMAR375.9.20160325T094103Z.wav_chan0.xml	0	0
25/03/2016 9:55	AMAR375.9.20160325T095530Z.wav_chan0.xml	0	0
25/03/2016 10:09	AMAR375.9.20160325T100957Z.wav_chan0.xml	0	0
25/03/2016 10:24	AMAR375.9.20160325T102424Z.wav_chan0.xml	0	0
25/03/2016 10:38	AMAR375.9.20160325T103851Z.wav_chan0.xml	0	0
25/03/2016 10:53	AMAR375.9.20160325T105318Z.wav_chan0.xml	0	0
25/03/2016 11:07	AMAR375.9.20160325T110745Z.wav_chan0.xml	0	0
25/03/2016 11:22	AMAR375.9.20160325T112212Z.wav_chan0.xml	0	0
25/03/2016 11:36	AMAR375.9.20160325T113639Z.wav_chan0.xml	0	0
25/03/2016 11:51	AMAR375.9.20160325T115106Z.wav_chan0.xml	0	0
25/03/2016 12:05	AMAR375.9.20160325T120533Z.wav_chan0.xml	0	0
25/03/2016 12:20	AMAR375.9.20160325T122000Z.wav_chan0.xml	2	0
25/03/2016 12:34	AMAR375.9.20160325T123427Z.wav_chan0.xml	0	0
25/03/2016 12:48	AMAR375.9.20160325T124854Z.wav_chan0.xml	1	0
25/03/2016 13:03	AMAR375.9.20160325T130321Z.wav_chan0.xml	0	0
25/03/2016 13:17	AMAR375.9.20160325T131748Z.wav_chan0.xml	0	0
25/03/2016 13:32	AMAR375.9.20160325T133215Z.wav_chan0.xml	0	0
25/03/2016 13:46	AMAR375.9.20160325T134642Z.wav_chan0.xml	0	0
25/03/2016 14:01	AMAR375.9.20160325T140109Z.wav_chan0.xml	0	0
25/03/2016 14:15	AMAR375.9.20160325T141536Z.wav_chan0.xml	0	0
25/03/2016 14:30	AMAR375.9.20160325T143003Z.wav_chan0.xml	0	0
25/03/2016 14:44	AMAR375.9.20160325T144430Z.wav_chan0.xml	0	0
25/03/2016 14:58	AMAR375.9.20160325T145857Z.wav_chan0.xml	0	0
25/03/2016 15:13	AMAR375.9.20160325T151324Z.wav_chan0.xml	0	0
25/03/2016 15:27	AMAR375.9.20160325T152751Z.wav_chan0.xml	0	0
25/03/2016 15:42	AMAR375.9.20160325T154218Z.wav_chan0.xml	0	0
25/03/2016 15:56	AMAR375.9.20160325T155645Z.wav_chan0.xml	0	0
25/03/2016 16:11	AMAR375.9.20160325T161112Z.wav_chan0.xml	0	0
25/03/2016 16:25	AMAR375.9.20160325T162539Z.wav_chan0.xml	0	0
25/03/2016 16:40	AMAR375.9.20160325T164006Z.wav_chan0.xml	0	0
25/03/2016 16:54	AMAR375.9.20160325T165433Z.wav_chan0.xml	0	0
25/03/2016 17:09	AMAR375.9.20160325T170900Z.wav_chan0.xml	0	0
25/03/2016 17:23	AMAR375.9.20160325T172327Z.wav_chan0.xml	0	0
25/03/2016 17:37	AMAR375.9.20160325T173754Z.wav_chan0.xml	0	0
25/03/2016 17:52	AMAR375.9.20160325T175221Z.wav_chan0.xml	0	0
25/03/2016 18:06	AMAR375.9.20160325T180648Z.wav_chan0.xml	0	0
25/03/2016 18:21	AMAR375.9.20160325T182115Z.wav_chan0.xml	0	0
25/03/2016 18:35	AMAR375.9.20160325T183542Z.wav_chan0.xml	0	0
25/03/2016 18:50	AMAR375.9.20160325T185009Z.wav_chan0.xml	0	0
25/03/2016 19:04	AMAR375.9.20160325T190436Z.wav_chan0.xml	0	0
25/03/2016 19:19	AMAR375.9.20160325T191903Z.wav_chan0.xml	0	0
25/03/2016 19:33	AMAR375.9.20160325T193330Z.wav_chan0.xml	2	0
25/03/2016 19:47	AMAR375.9.20160325T194757Z.wav_chan0.xml	9	0
25/03/2016 20:02	AMAR375.9.20160325T200224Z.wav_chan0.xml	0	0
25/03/2016 20:16	AMAR375.9.20160325T201651Z.wav_chan0.xml	0	0
25/03/2016 20:31	AMAR375.9.20160325T203118Z.wav_chan0.xml	0	0
25/03/2016 20:45	AMAR375.9.20160325T204545Z.wav_chan0.xml	0	0
25/03/2016 21:00	AMAR375.9.20160325T210012Z.wav_chan0.xml	0	0
25/03/2016 21:14	AMAR375.9.20160325T211439Z.wav_chan0.xml	0	0
25/03/2016 21:29	AMAR375.9.20160325T212906Z.wav_chan0.xml	0	0
25/03/2016 21:43	AMAR375.9.20160325T214333Z.wav_chan0.xml	0	0
25/03/2016 21:58	AMAR375.9.20160325T215800Z.wav_chan0.xml	0	0
25/03/2016 22:12	AMAR375.9.20160325T221227Z.wav_chan0.xml	0	0
25/03/2016 22:26	AMAR375.9.20160325T222654Z.wav_chan0.xml	0	2
25/03/2016 22:41	AMAR375.9.20160325T224121Z.wav_chan0.xml	0	0
25/03/2016 22:55	AMAR375.9.20160325T225548Z.wav_chan0.xml	0	0
25/03/2016 23:10	AMAR375.9.20160325T231015Z.wav_chan0.xml	11	0
25/03/2016 23:24	AMAR375.9.20160325T232442Z.wav_chan0.xml	6	1
25/03/2016 23:39	AMAR375.9.20160325T233909Z.wav_chan0.xml	0	0
25/03/2016 23:53	AMAR375.9.20160325T235336Z.wav_chan0.xml	0	0
26/03/2016 0:08	AMAR375.9.20160326T000803Z.wav_chan0.xml	0	0
26/03/2016 0:22	AMAR375.9.20160326T002230Z.wav_chan0.xml	0	0
26/03/2016 0:36	AMAR375.9.20160326T003657Z.wav_chan0.xml	0	0
26/03/2016 0:51	AMAR375.9.20160326T005124Z.wav_chan0.xml	0	0
26/03/2016 1:05	AMAR375.9.20160326T010551Z.wav_chan0.xml	0	0
26/03/2016 1:20	AMAR375.9.20160326T012018Z.wav_chan0.xml	0	0
26/03/2016 1:34	AMAR375.9.20160326T013445Z.wav_chan0.xml	0	0
26/03/2016 1:49	AMAR375.9.20160326T014912Z.wav_chan0.xml	0	0
26/03/2016 2:03	AMAR375.9.20160326T020339Z.wav_chan0.xml	0	0
26/03/2016 2:18	AMAR375.9.20160326T021806Z.wav_chan0.xml	0	0
26/03/2016 2:32	AMAR375.9.20160326T023233Z.wav_chan0.xml	0	0
26/03/2016 2:47	AMAR375.9.20160326T024700Z.wav_chan0.xml	0	0
26/03/2016 3:01	AMAR375.9.20160326T030127Z.wav_chan0.xml	0	0
26/03/2016 3:15	AMAR375.9.20160326T031554Z.wav_chan0.xml	0	0
26/03/2016 3:30	AMAR375.9.20160326T033021Z.wav_chan0.xml	0	0
26/03/2016 3:44	AMAR375.9.20160326T034448Z.wav_chan0.xml	0	0
26/03/2016 3:59	AMAR375.9.20160326T035915Z.wav_chan0.xml	0	0
26/03/2016 4:13	AMAR375.9.20160326T041342Z.wav_chan0.xml	0	2
26/03/2016 4:28	AMAR375.9.20160326T042809Z.wav_chan0.xml	0	0
26/03/2016 4:42	AMAR375.9.20160326T044236Z.wav_chan0.xml	2	0
26/03/2016 4:57	AMAR375.9.20160326T045703Z.wav_chan0.xml	0	0
26/03/2016 5:11	AMAR375.9.20160326T051130Z.wav_chan0.xml	0	0
26/03/2016 5:25	AMAR375.9.20160326T052557Z.wav_chan0.xml	0	0
26/03/2016 5:40	AMAR375.9.20160326T054024Z.wav_chan0.xml	0	0
26/03/2016 5:54	AMAR375.9.20160326T055451Z.wav_chan0.xml	0	0
26/03/2016 6:09	AMAR375.9.20160326T060918Z.wav_chan0.xml	0	0
26/03/2016 6:23	AMAR375.9.20160326T062345Z.wav_chan0.xml	0	0
26/03/2016 6:38	AMAR375.9.20160326T063812Z.wav_chan0.xml	0	0
26/03/2016 6:52	AMAR375.9.20160326T065239Z.wav_chan0.xml	0	0
26/03/2016 7:07	AMAR375.9.20160326T070706Z.wav_chan0.xml	0	0
26/03/2016 7:21	AMAR375.9.20160326T072133Z.wav_chan0.xml	0	0
26/03/2016 7:36	AMAR375.9.20160326T073600Z.wav_chan0.xml	0	0
26/03/2016 7:50	AMAR375.9.20160326T075027Z.wav_chan0.xml	0	0
26/03/2016 8:04	AMAR375.9.20160326T080454Z.wav_chan0.xml	0	0
26/03/2016 8:19	AMAR375.9.20160326T081921Z.wav_chan0.xml	0	0
26/03/2016 8:33	AMAR375.9.20160326T083348Z.wav_chan0.xml	0	0
26/03/2016 8:48	AMAR375.9.20160326T084815Z.wav_chan0.xml	0	0
26/03/2016 9:02	AMAR375.9.20160326T090242Z.wav_chan0.xml	0	0
26/03/2016 9:17	AMAR375.9.20160326T091709Z.wav_chan0.xml	0	0
26/03/2016 9:31	AMAR375.9.20160326T093136Z.wav_chan0.xml	0	0
26/03/2016 9:46	AMAR375.9.20160326T094603Z.wav_chan0.xml	0	0
26/03/2016 10:00	AMAR375.9.20160326T100030Z.wav_chan0.xml	0	0
26/03/2016 10:14	AMAR375.9.20160326T101457Z.wav_chan0.xml	0	0
26/03/2016 10:29	AMAR375.9.20160326T102924Z.wav_chan0.xml	0	0
26/03/2016 10:43	AMAR375.9.20160326T104351Z.wav_chan0.xml	0	0
26/03/2016 10:58	AMAR375.9.20160326T105818Z.wav_chan0.xml	0	0
26/03/2016 11:12	AMAR375.9.20160326T111245Z.wav_chan0.xml	0	0
26/03/2016 11:27	AMAR375.9.20160326T112712Z.wav_chan0.xml	0	0
26/03/2016 11:41	AMAR375.9.20160326T114139Z.wav_chan0.xml	0	0
26/03/2016 11:56	AMAR375.9.20160326T115606Z.wav_chan0.xml	0	0
26/03/2016 12:10	AMAR375.9.20160326T121033Z.wav_chan0.xml	0	0
26/03/2016 12:25	AMAR375.9.20160326T122500Z.wav_chan0.xml	0	0
26/03/2016 12:39	AMAR375.9.20160326T123927Z.wav_chan0.xml	0	0
26/03/2016 12:53	AMAR375.9.20160326T125354Z.wav_chan0.xml	0	0
26/03/2016 13:08	AMAR375.9.20160326T130821Z.wav_chan0.xml	0	0
26/03/2016 13:22	AMAR375.9.20160326T132248Z.wav_chan0.xml	0	0
26/03/2016 13:37	AMAR375.9.20160326T133715Z.wav_chan0.xml	0	0
26/03/2016 13:51	AMAR375.9.20160326T135142Z.wav_chan0.xml	0	0
26/03/2016 14:06	AMAR375.9.20160326T140609Z.wav_chan0.xml	0	0
26/03/2016 14:20	AMAR375.9.20160326T142036Z.wav_chan0.xml	0	0
26/03/2016 14:35	AMAR375.9.20160326T143503Z.wav_chan0.xml	0	0
26/03/2016 14:49	AMAR375.9.20160326T144930Z.wav_chan0.xml	0	0
26/03/2016 15:03	AMAR375.9.20160326T150357Z.wav_chan0.xml	0	0
26/03/2016 15:18	AMAR375.9.20160326T151824Z.wav_chan0.xml	0	0
26/03/2016 15:32	AMAR375.9.20160326T153251Z.wav_chan0.xml	0	0
26/03/2016 15:47	AMAR375.9.20160326T154718Z.wav_chan0.xml	0	0
26/03/2016 16:01	AMAR375.9.20160326T160145Z.wav_chan0.xml	0	0
26/03/2016 16:16	AMAR375.9.20160326T161612Z.wav_chan0.xml	0	0
26/03/2016 16:30	AMAR375.9.20160326T163039Z.wav_chan0.xml	0	0
26/03/2016 16:45	AMAR375.9.20160326T164506Z.wav_chan0.xml	0	0
26/03/2016 16:59	AMAR375.9.20160326T165933Z.wav_chan0.xml	0	0
26/03/2016 17:14	AMAR375.9.20160326T171400Z.wav_chan0.xml	0	0
26/03/2016 17:28	AMAR375.9.20160326T172827Z.wav_chan0.xml	0	0
26/03/2016 17:42	AMAR375.9.20160326T174254Z.wav_chan0.xml	0	0
26/03/2016 17:57	AMAR375.9.20160326T175721Z.wav_chan0.xml	0	0
26/03/2016 18:11	AMAR375.9.20160326T181148Z.wav_chan0.xml	0	0
26/03/2016 18:26	AMAR375.9.20160326T182615Z.wav_chan0.xml	0	0
26/03/2016 18:40	AMAR375.9.20160326T184042Z.wav_chan0.xml	0	0
26/03/2016 18:55	AMAR375.9.20160326T185509Z.wav_chan0.xml	2	0
26/03/2016 19:09	AMAR375.9.20160326T190936Z.wav_chan0.xml	0	0
26/03/2016 19:24	AMAR375.9.20160326T192403Z.wav_chan0.xml	0	0
26/03/2016 19:38	AMAR375.9.20160326T193830Z.wav_chan0.xml	0	0
26/03/2016 19:52	AMAR375.9.20160326T195257Z.wav_chan0.xml	0	0
26/03/2016 20:07	AMAR375.9.20160326T200724Z.wav_chan0.xml	0	0
26/03/2016 20:21	AMAR375.9.20160326T202151Z.wav_chan0.xml	0	0
26/03/2016 20:36	AMAR375.9.20160326T203618Z.wav_chan0.xml	0	0
26/03/2016 20:50	AMAR375.9.20160326T205045Z.wav_chan0.xml	0	0
26/03/2016 21:05	AMAR375.9.20160326T210512Z.wav_chan0.xml	0	0
26/03/2016 21:19	AMAR375.9.20160326T211939Z.wav_chan0.xml	0	0
26/03/2016 21:34	AMAR375.9.20160326T213406Z.wav_chan0.xml	0	0
26/03/2016 21:48	AMAR375.9.20160326T214833Z.wav_chan0.xml	0	0
26/03/2016 22:03	AMAR375.9.20160326T220300Z.wav_chan0.xml	0	0
26/03/2016 22:17	AMAR375.9.20160326T221727Z.wav_chan0.xml	0	0
26/03/2016 22:31	AMAR375.9.20160326T223154Z.wav_chan0.xml	0	0
26/03/2016 22:46	AMAR375.9.20160326T224621Z.wav_chan0.xml	0	0
26/03/2016 23:00	AMAR375.9.20160326T230048Z.wav_chan0.xml	0	0
26/03/2016 23:15	AMAR375.9.20160326T231515Z.wav_chan0.xml	0	0
26/03/2016 23:29	AMAR375.9.20160326T232942Z.wav_chan0.xml	0	0
26/03/2016 23:44	AMAR375.9.20160326T234409Z.wav_chan0.xml	0	0
26/03/2016 23:58	AMAR375.9.20160326T235836Z.wav_chan0.xml	0	0
27/03/2016 0:13	AMAR375.9.20160327T001303Z.wav_chan0.xml	0	0
27/03/2016 0:27	AMAR375.9.20160327T002730Z.wav_chan0.xml	0	0
27/03/2016 0:41	AMAR375.9.20160327T004157Z.wav_chan0.xml	0	0
27/03/2016 0:56	AMAR375.9.20160327T005624Z.wav_chan0.xml	0	0
27/03/2016 1:10	AMAR375.9.20160327T011051Z.wav_chan0.xml	0	0
27/03/2016 1:25	AMAR375.9.20160327T012518Z.wav_chan0.xml	0	0
27/03/2016 1:39	AMAR375.9.20160327T013945Z.wav_chan0.xml	0	0
27/03/2016 1:54	AMAR375.9.20160327T015412Z.wav_chan0.xml	0	0
27/03/2016 2:08	AMAR375.9.20160327T020839Z.wav_chan0.xml	0	0
27/03/2016 2:23	AMAR375.9.20160327T022306Z.wav_chan0.xml	0	0
27/03/2016 2:37	AMAR375.9.20160327T023733Z.wav_chan0.xml	0	0
27/03/2016 2:52	AMAR375.9.20160327T025200Z.wav_chan0.xml	0	0
27/03/2016 3:06	AMAR375.9.20160327T030627Z.wav_chan0.xml	0	0
27/03/2016 3:20	AMAR375.9.20160327T032054Z.wav_chan0.xml	0	0
27/03/2016 3:35	AMAR375.9.20160327T033521Z.wav_chan0.xml	0	0
27/03/2016 3:49	AMAR375.9.20160327T034948Z.wav_chan0.xml	0	0
27/03/2016 4:04	AMAR375.9.20160327T040415Z.wav_chan0.xml	0	0
27/03/2016 4:18	AMAR375.9.20160327T041842Z.wav_chan0.xml	0	0
27/03/2016 4:33	AMAR375.9.20160327T043309Z.wav_chan0.xml	0	0
27/03/2016 4:47	AMAR375.9.20160327T044736Z.wav_chan0.xml	0	0
27/03/2016 5:02	AMAR375.9.20160327T050203Z.wav_chan0.xml	0	0
27/03/2016 5:16	AMAR375.9.20160327T051630Z.wav_chan0.xml	0	0
27/03/2016 5:30	AMAR375.9.20160327T053057Z.wav_chan0.xml	0	0
27/03/2016 5:45	AMAR375.9.20160327T054524Z.wav_chan0.xml	0	0
27/03/2016 5:59	AMAR375.9.20160327T055951Z.wav_chan0.xml	0	0
27/03/2016 6:14	AMAR375.9.20160327T061418Z.wav_chan0.xml	0	0
27/03/2016 6:28	AMAR375.9.20160327T062845Z.wav_chan0.xml	0	0
27/03/2016 6:43	AMAR375.9.20160327T064312Z.wav_chan0.xml	0	0
27/03/2016 6:57	AMAR375.9.20160327T065739Z.wav_chan0.xml	0	0
27/03/2016 7:12	AMAR375.9.20160327T071206Z.wav_chan0.xml	0	0
27/03/2016 7:26	AMAR375.9.20160327T072633Z.wav_chan0.xml	0	0
27/03/2016 7:41	AMAR375.9.20160327T074100Z.wav_chan0.xml	0	0
27/03/2016 7:55	AMAR375.9.20160327T075527Z.wav_chan0.xml	0	0
27/03/2016 8:09	AMAR375.9.20160327T080954Z.wav_chan0.xml	0	0
27/03/2016 8:24	AMAR375.9.20160327T082421Z.wav_chan0.xml	0	0
27/03/2016 8:38	AMAR375.9.20160327T083848Z.wav_chan0.xml	0	0
27/03/2016 8:53	AMAR375.9.20160327T085315Z.wav_chan0.xml	0	0
27/03/2016 9:07	AMAR375.9.20160327T090742Z.wav_chan0.xml	0	0
27/03/2016 9:22	AMAR375.9.20160327T092209Z.wav_chan0.xml	0	0
27/03/2016 9:36	AMAR375.9.20160327T093636Z.wav_chan0.xml	0	0
27/03/2016 9:51	AMAR375.9.20160327T095103Z.wav_chan0.xml	0	0
27/03/2016 10:05	AMAR375.9.20160327T100530Z.wav_chan0.xml	0	0
27/03/2016 10:19	AMAR375.9.20160327T101957Z.wav_chan0.xml	0	0
27/03/2016 10:34	AMAR375.9.20160327T103424Z.wav_chan0.xml	0	0
27/03/2016 10:48	AMAR375.9.20160327T104851Z.wav_chan0.xml	0	0
27/03/2016 11:03	AMAR375.9.20160327T110318Z.wav_chan0.xml	0	0
27/03/2016 11:17	AMAR375.9.20160327T111745Z.wav_chan0.xml	0	0
27/03/2016 11:32	AMAR375.9.20160327T113212Z.wav_chan0.xml	0	0
27/03/2016 11:46	AMAR375.9.20160327T114639Z.wav_chan0.xml	4	0
27/03/2016 12:01	AMAR375.9.20160327T120106Z.wav_chan0.xml	0	0
27/03/2016 12:15	AMAR375.9.20160327T121533Z.wav_chan0.xml	0	0
27/03/2016 12:30	AMAR375.9.20160327T123000Z.wav_chan0.xml	0	0
27/03/2016 12:44	AMAR375.9.20160327T124427Z.wav_chan0.xml	0	0
27/03/2016 12:58	AMAR375.9.20160327T125854Z.wav_chan0.xml	0	0
27/03/2016 13:13	AMAR375.9.20160327T131321Z.wav_chan0.xml	0	0
27/03/2016 13:27	AMAR375.9.20160327T132748Z.wav_chan0.xml	0	0
27/03/2016 13:42	AMAR375.9.20160327T134215Z.wav_chan0.xml	0	0
27/03/2016 13:56	AMAR375.9.20160327T135642Z.wav_chan0.xml	0	0
27/03/2016 14:11	AMAR375.9.20160327T141109Z.wav_chan0.xml	0	0
27/03/2016 14:25	AMAR375.9.20160327T142536Z.wav_chan0.xml	0	0
27/03/2016 14:40	AMAR375.9.20160327T144003Z.wav_chan0.xml	0	0
27/03/2016 14:54	AMAR375.9.20160327T145430Z.wav_chan0.xml	0	0
27/03/2016 15:08	AMAR375.9.20160327T150857Z.wav_chan0.xml	0	0
27/03/2016 15:23	AMAR375.9.20160327T152324Z.wav_chan0.xml	0	0
27/03/2016 15:37	AMAR375.9.20160327T153751Z.wav_chan0.xml	0	0
27/03/2016 15:52	AMAR375.9.20160327T155218Z.wav_chan0.xml	0	0
27/03/2016 16:06	AMAR375.9.20160327T160645Z.wav_chan0.xml	0	0
27/03/2016 16:21	AMAR375.9.20160327T162112Z.wav_chan0.xml	0	0
27/03/2016 16:35	AMAR375.9.20160327T163539Z.wav_chan0.xml	0	0
27/03/2016 16:50	AMAR375.9.20160327T165006Z.wav_chan0.xml	0	0
27/03/2016 17:04	AMAR375.9.20160327T170433Z.wav_chan0.xml	0	0
27/03/2016 17:19	AMAR375.9.20160327T171900Z.wav_chan0.xml	0	0
27/03/2016 17:33	AMAR375.9.20160327T173327Z.wav_chan0.xml	0	0
27/03/2016 17:47	AMAR375.9.20160327T174754Z.wav_chan0.xml	0	0
27/03/2016 18:02	AMAR375.9.20160327T180221Z.wav_chan0.xml	0	0
27/03/2016 18:16	AMAR375.9.20160327T181648Z.wav_chan0.xml	0	0
27/03/2016 18:31	AMAR375.9.20160327T183115Z.wav_chan0.xml	0	0
27/03/2016 18:45	AMAR375.9.20160327T184542Z.wav_chan0.xml	0	0
27/03/2016 19:00	AMAR375.9.20160327T190009Z.wav_chan0.xml	0	0
27/03/2016 19:14	AMAR375.9.20160327T191436Z.wav_chan0.xml	0	0
27/03/2016 19:29	AMAR375.9.20160327T192903Z.wav_chan0.xml	0	0
27/03/2016 19:43	AMAR375.9.20160327T194330Z.wav_chan0.xml	0	0
27/03/2016 19:57	AMAR375.9.20160327T195757Z.wav_chan0.xml	0	0
27/03/2016 20:12	AMAR375.9.20160327T201224Z.wav_chan0.xml	0	0
27/03/2016 20:26	AMAR375.9.20160327T202651Z.wav_chan0.xml	0	0
27/03/2016 20:41	AMAR375.9.20160327T204118Z.wav_chan0.xml	0	0
27/03/2016 20:55	AMAR375.9.20160327T205545Z.wav_chan0.xml	0	0
27/03/2016 21:10	AMAR375.9.20160327T211012Z.wav_chan0.xml	0	0
27/03/2016 21:24	AMAR375.9.20160327T212439Z.wav_chan0.xml	0	0
27/03/2016 21:39	AMAR375.9.20160327T213906Z.wav_chan0.xml	0	0
27/03/2016 21:53	AMAR375.9.20160327T215333Z.wav_chan0.xml	0	0
27/03/2016 22:08	AMAR375.9.20160327T220800Z.wav_chan0.xml	0	0
27/03/2016 22:22	AMAR375.9.20160327T222227Z.wav_chan0.xml	0	0
27/03/2016 22:36	AMAR375.9.20160327T223654Z.wav_chan0.xml	0	0
27/03/2016 22:51	AMAR375.9.20160327T225121Z.wav_chan0.xml	0	0
27/03/2016 23:05	AMAR375.9.20160327T230548Z.wav_chan0.xml	0	0
27/03/2016 23:20	AMAR375.9.20160327T232015Z.wav_chan0.xml	0	0
27/03/2016 23:34	AMAR375.9.20160327T233442Z.wav_chan0.xml	0	0
27/03/2016 23:49	AMAR375.9.20160327T234909Z.wav_chan0.xml	0	0
28/03/2016 0:03	AMAR375.9.20160328T000336Z.wav_chan0.xml	0	0
28/03/2016 0:18	AMAR375.9.20160328T001803Z.wav_chan0.xml	0	0
28/03/2016 0:32	AMAR375.9.20160328T003230Z.wav_chan0.xml	0	0
28/03/2016 0:46	AMAR375.9.20160328T004657Z.wav_chan0.xml	0	0
28/03/2016 1:01	AMAR375.9.20160328T010124Z.wav_chan0.xml	0	0
28/03/2016 1:15	AMAR375.9.20160328T011551Z.wav_chan0.xml	0	0
28/03/2016 1:30	AMAR375.9.20160328T013018Z.wav_chan0.xml	0	0
28/03/2016 1:44	AMAR375.9.20160328T014445Z.wav_chan0.xml	0	0
28/03/2016 1:59	AMAR375.9.20160328T015912Z.wav_chan0.xml	0	0
28/03/2016 2:13	AMAR375.9.20160328T021339Z.wav_chan0.xml	1	0
28/03/2016 2:28	AMAR375.9.20160328T022806Z.wav_chan0.xml	0	0
28/03/2016 2:42	AMAR375.9.20160328T024233Z.wav_chan0.xml	0	0
28/03/2016 2:57	AMAR375.9.20160328T025700Z.wav_chan0.xml	0	0
28/03/2016 3:11	AMAR375.9.20160328T031127Z.wav_chan0.xml	0	0
28/03/2016 3:25	AMAR375.9.20160328T032554Z.wav_chan0.xml	0	0
28/03/2016 3:40	AMAR375.9.20160328T034021Z.wav_chan0.xml	0	0
28/03/2016 3:54	AMAR375.9.20160328T035448Z.wav_chan0.xml	0	0
28/03/2016 4:09	AMAR375.9.20160328T040915Z.wav_chan0.xml	9	0
28/03/2016 4:23	AMAR375.9.20160328T042342Z.wav_chan0.xml	0	0
28/03/2016 4:38	AMAR375.9.20160328T043809Z.wav_chan0.xml	0	0
28/03/2016 4:52	AMAR375.9.20160328T045236Z.wav_chan0.xml	0	0
28/03/2016 5:07	AMAR375.9.20160328T050703Z.wav_chan0.xml	0	0
28/03/2016 5:21	AMAR375.9.20160328T052130Z.wav_chan0.xml	2	0
28/03/2016 5:35	AMAR375.9.20160328T053557Z.wav_chan0.xml	0	0
28/03/2016 5:50	AMAR375.9.20160328T055024Z.wav_chan0.xml	0	0
28/03/2016 6:04	AMAR375.9.20160328T060451Z.wav_chan0.xml	0	0
28/03/2016 6:19	AMAR375.9.20160328T061918Z.wav_chan0.xml	0	0
28/03/2016 6:33	AMAR375.9.20160328T063345Z.wav_chan0.xml	0	0
28/03/2016 6:48	AMAR375.9.20160328T064812Z.wav_chan0.xml	0	0
28/03/2016 7:02	AMAR375.9.20160328T070239Z.wav_chan0.xml	0	0
28/03/2016 7:17	AMAR375.9.20160328T071706Z.wav_chan0.xml	0	0
28/03/2016 7:31	AMAR375.9.20160328T073133Z.wav_chan0.xml	0	0
28/03/2016 7:46	AMAR375.9.20160328T074600Z.wav_chan0.xml	0	0
28/03/2016 8:00	AMAR375.9.20160328T080027Z.wav_chan0.xml	0	0
28/03/2016 8:14	AMAR375.9.20160328T081454Z.wav_chan0.xml	0	0
28/03/2016 8:29	AMAR375.9.20160328T082921Z.wav_chan0.xml	0	0
28/03/2016 8:43	AMAR375.9.20160328T084348Z.wav_chan0.xml	0	0
28/03/2016 8:58	AMAR375.9.20160328T085815Z.wav_chan0.xml	0	0
28/03/2016 9:12	AMAR375.9.20160328T091242Z.wav_chan0.xml	0	0
28/03/2016 9:27	AMAR375.9.20160328T092709Z.wav_chan0.xml	0	0
28/03/2016 9:41	AMAR375.9.20160328T094136Z.wav_chan0.xml	0	0
28/03/2016 9:56	AMAR375.9.20160328T095603Z.wav_chan0.xml	0	0
28/03/2016 10:10	AMAR375.9.20160328T101030Z.wav_chan0.xml	0	0
28/03/2016 10:24	AMAR375.9.20160328T102457Z.wav_chan0.xml	0	0
28/03/2016 10:39	AMAR375.9.20160328T103924Z.wav_chan0.xml	0	0
28/03/2016 10:53	AMAR375.9.20160328T105351Z.wav_chan0.xml	0	0
28/03/2016 11:08	AMAR375.9.20160328T110818Z.wav_chan0.xml	0	0
28/03/2016 11:22	AMAR375.9.20160328T112245Z.wav_chan0.xml	0	0
28/03/2016 11:37	AMAR375.9.20160328T113712Z.wav_chan0.xml	0	0
28/03/2016 11:51	AMAR375.9.20160328T115139Z.wav_chan0.xml	0	0
28/03/2016 12:06	AMAR375.9.20160328T120606Z.wav_chan0.xml	0	0
28/03/2016 12:20	AMAR375.9.20160328T122033Z.wav_chan0.xml	0	0
28/03/2016 12:35	AMAR375.9.20160328T123500Z.wav_chan0.xml	0	0
28/03/2016 12:49	AMAR375.9.20160328T124927Z.wav_chan0.xml	0	0
28/03/2016 13:03	AMAR375.9.20160328T130354Z.wav_chan0.xml	0	0
28/03/2016 13:18	AMAR375.9.20160328T131821Z.wav_chan0.xml	5	0
28/03/2016 13:32	AMAR375.9.20160328T133248Z.wav_chan0.xml	0	0
28/03/2016 13:47	AMAR375.9.20160328T134715Z.wav_chan0.xml	0	0
28/03/2016 14:01	AMAR375.9.20160328T140142Z.wav_chan0.xml	0	0
28/03/2016 14:16	AMAR375.9.20160328T141609Z.wav_chan0.xml	0	0
28/03/2016 14:30	AMAR375.9.20160328T143036Z.wav_chan0.xml	0	0
28/03/2016 14:45	AMAR375.9.20160328T144503Z.wav_chan0.xml	0	0
28/03/2016 14:59	AMAR375.9.20160328T145930Z.wav_chan0.xml	0	0
28/03/2016 15:13	AMAR375.9.20160328T151357Z.wav_chan0.xml	0	0
28/03/2016 15:28	AMAR375.9.20160328T152824Z.wav_chan0.xml	0	0
28/03/2016 15:42	AMAR375.9.20160328T154251Z.wav_chan0.xml	0	0
28/03/2016 15:57	AMAR375.9.20160328T155718Z.wav_chan0.xml	0	0
28/03/2016 16:11	AMAR375.9.20160328T161145Z.wav_chan0.xml	0	0
28/03/2016 16:26	AMAR375.9.20160328T162612Z.wav_chan0.xml	0	0
28/03/2016 16:40	AMAR375.9.20160328T164039Z.wav_chan0.xml	0	0
28/03/2016 16:55	AMAR375.9.20160328T165506Z.wav_chan0.xml	0	0
28/03/2016 17:09	AMAR375.9.20160328T170933Z.wav_chan0.xml	0	0
28/03/2016 17:24	AMAR375.9.20160328T172400Z.wav_chan0.xml	0	0
28/03/2016 17:38	AMAR375.9.20160328T173827Z.wav_chan0.xml	0	0
28/03/2016 17:52	AMAR375.9.20160328T175254Z.wav_chan0.xml	0	0
28/03/2016 18:07	AMAR375.9.20160328T180721Z.wav_chan0.xml	0	0
28/03/2016 18:21	AMAR375.9.20160328T182148Z.wav_chan0.xml	0	0
28/03/2016 18:36	AMAR375.9.20160328T183615Z.wav_chan0.xml	0	0
28/03/2016 18:50	AMAR375.9.20160328T185042Z.wav_chan0.xml	0	0
28/03/2016 19:05	AMAR375.9.20160328T190509Z.wav_chan0.xml	2	0
28/03/2016 19:19	AMAR375.9.20160328T191936Z.wav_chan0.xml	0	0
28/03/2016 19:34	AMAR375.9.20160328T193403Z.wav_chan0.xml	12	0
28/03/2016 19:48	AMAR375.9.20160328T194830Z.wav_chan0.xml	0	0
28/03/2016 20:02	AMAR375.9.20160328T200257Z.wav_chan0.xml	0	0
28/03/2016 20:17	AMAR375.9.20160328T201724Z.wav_chan0.xml	0	0
28/03/2016 20:31	AMAR375.9.20160328T203151Z.wav_chan0.xml	0	0
28/03/2016 20:46	AMAR375.9.20160328T204618Z.wav_chan0.xml	0	0
28/03/2016 21:00	AMAR375.9.20160328T210045Z.wav_chan0.xml	0	0
28/03/2016 21:15	AMAR375.9.20160328T211512Z.wav_chan0.xml	0	0
28/03/2016 21:29	AMAR375.9.20160328T212939Z.wav_chan0.xml	0	0
28/03/2016 21:44	AMAR375.9.20160328T214406Z.wav_chan0.xml	0	0
28/03/2016 21:58	AMAR375.9.20160328T215833Z.wav_chan0.xml	0	0
28/03/2016 22:13	AMAR375.9.20160328T221300Z.wav_chan0.xml	0	0
28/03/2016 22:27	AMAR375.9.20160328T222727Z.wav_chan0.xml	2	0
28/03/2016 22:41	AMAR375.9.20160328T224154Z.wav_chan0.xml	21	0
28/03/2016 22:56	AMAR375.9.20160328T225621Z.wav_chan0.xml	0	0
28/03/2016 23:10	AMAR375.9.20160328T231048Z.wav_chan0.xml	0	0
28/03/2016 23:25	AMAR375.9.20160328T232515Z.wav_chan0.xml	0	0
28/03/2016 23:39	AMAR375.9.20160328T233942Z.wav_chan0.xml	0	0
28/03/2016 23:54	AMAR375.9.20160328T235409Z.wav_chan0.xml	0	0
29/03/2016 0:08	AMAR375.9.20160329T000836Z.wav_chan0.xml	0	0
29/03/2016 0:23	AMAR375.9.20160329T002303Z.wav_chan0.xml	0	0
29/03/2016 0:37	AMAR375.9.20160329T003730Z.wav_chan0.xml	0	0
29/03/2016 0:51	AMAR375.9.20160329T005157Z.wav_chan0.xml	0	0
29/03/2016 1:06	AMAR375.9.20160329T010624Z.wav_chan0.xml	0	0
29/03/2016 1:20	AMAR375.9.20160329T012051Z.wav_chan0.xml	0	1
29/03/2016 1:35	AMAR375.9.20160329T013518Z.wav_chan0.xml	0	0
29/03/2016 1:49	AMAR375.9.20160329T014945Z.wav_chan0.xml	0	0
29/03/2016 2:04	AMAR375.9.20160329T020412Z.wav_chan0.xml	0	0
29/03/2016 2:18	AMAR375.9.20160329T021839Z.wav_chan0.xml	0	0
29/03/2016 2:33	AMAR375.9.20160329T023306Z.wav_chan0.xml	0	0
29/03/2016 2:47	AMAR375.9.20160329T024733Z.wav_chan0.xml	0	0
29/03/2016 3:02	AMAR375.9.20160329T030200Z.wav_chan0.xml	0	0
29/03/2016 3:16	AMAR375.9.20160329T031627Z.wav_chan0.xml	0	0
29/03/2016 3:30	AMAR375.9.20160329T033054Z.wav_chan0.xml	0	0
29/03/2016 3:45	AMAR375.9.20160329T034521Z.wav_chan0.xml	0	0
29/03/2016 3:59	AMAR375.9.20160329T035948Z.wav_chan0.xml	0	0
29/03/2016 4:14	AMAR375.9.20160329T041415Z.wav_chan0.xml	0	0
29/03/2016 4:28	AMAR375.9.20160329T042842Z.wav_chan0.xml	0	0
29/03/2016 4:43	AMAR375.9.20160329T044309Z.wav_chan0.xml	0	0
29/03/2016 4:57	AMAR375.9.20160329T045736Z.wav_chan0.xml	0	0
29/03/2016 5:12	AMAR375.9.20160329T051203Z.wav_chan0.xml	0	0
29/03/2016 5:26	AMAR375.9.20160329T052630Z.wav_chan0.xml	0	0
29/03/2016 5:40	AMAR375.9.20160329T054057Z.wav_chan0.xml	0	1
29/03/2016 5:55	AMAR375.9.20160329T055524Z.wav_chan0.xml	0	0
29/03/2016 6:09	AMAR375.9.20160329T060951Z.wav_chan0.xml	0	0
29/03/2016 6:24	AMAR375.9.20160329T062418Z.wav_chan0.xml	0	0
29/03/2016 6:38	AMAR375.9.20160329T063845Z.wav_chan0.xml	0	0
29/03/2016 6:53	AMAR375.9.20160329T065312Z.wav_chan0.xml	0	0
29/03/2016 7:07	AMAR375.9.20160329T070739Z.wav_chan0.xml	0	0
29/03/2016 7:22	AMAR375.9.20160329T072206Z.wav_chan0.xml	0	0
29/03/2016 7:36	AMAR375.9.20160329T073633Z.wav_chan0.xml	0	0
29/03/2016 7:51	AMAR375.9.20160329T075100Z.wav_chan0.xml	0	0
29/03/2016 8:05	AMAR375.9.20160329T080527Z.wav_chan0.xml	0	1
29/03/2016 8:19	AMAR375.9.20160329T081954Z.wav_chan0.xml	0	0
29/03/2016 8:34	AMAR375.9.20160329T083421Z.wav_chan0.xml	1	0
29/03/2016 8:48	AMAR375.9.20160329T084848Z.wav_chan0.xml	1	0
29/03/2016 9:03	AMAR375.9.20160329T090315Z.wav_chan0.xml	0	0
29/03/2016 9:17	AMAR375.9.20160329T091742Z.wav_chan0.xml	0	0
29/03/2016 9:32	AMAR375.9.20160329T093209Z.wav_chan0.xml	0	0
29/03/2016 9:46	AMAR375.9.20160329T094636Z.wav_chan0.xml	0	0
29/03/2016 10:01	AMAR375.9.20160329T100103Z.wav_chan0.xml	0	0
29/03/2016 10:15	AMAR375.9.20160329T101530Z.wav_chan0.xml	0	0
29/03/2016 10:29	AMAR375.9.20160329T102957Z.wav_chan0.xml	0	0
29/03/2016 10:44	AMAR375.9.20160329T104424Z.wav_chan0.xml	0	0
29/03/2016 10:58	AMAR375.9.20160329T105851Z.wav_chan0.xml	0	0
29/03/2016 11:13	AMAR375.9.20160329T111318Z.wav_chan0.xml	0	0
29/03/2016 11:27	AMAR375.9.20160329T112745Z.wav_chan0.xml	0	0
29/03/2016 11:42	AMAR375.9.20160329T114212Z.wav_chan0.xml	0	1
29/03/2016 11:56	AMAR375.9.20160329T115639Z.wav_chan0.xml	0	2
29/03/2016 12:11	AMAR375.9.20160329T121106Z.wav_chan0.xml	0	0
29/03/2016 12:25	AMAR375.9.20160329T122533Z.wav_chan0.xml	0	0
29/03/2016 12:40	AMAR375.9.20160329T124000Z.wav_chan0.xml	0	0
29/03/2016 12:54	AMAR375.9.20160329T125427Z.wav_chan0.xml	0	0
29/03/2016 13:08	AMAR375.9.20160329T130854Z.wav_chan0.xml	0	0
29/03/2016 13:23	AMAR375.9.20160329T132321Z.wav_chan0.xml	0	0
29/03/2016 13:37	AMAR375.9.20160329T133748Z.wav_chan0.xml	0	0
29/03/2016 13:52	AMAR375.9.20160329T135215Z.wav_chan0.xml	0	0
29/03/2016 14:06	AMAR375.9.20160329T140642Z.wav_chan0.xml	0	0
29/03/2016 14:21	AMAR375.9.20160329T142109Z.wav_chan0.xml	0	0
29/03/2016 14:35	AMAR375.9.20160329T143536Z.wav_chan0.xml	0	0
29/03/2016 14:50	AMAR375.9.20160329T145003Z.wav_chan0.xml	0	0
29/03/2016 15:04	AMAR375.9.20160329T150430Z.wav_chan0.xml	0	0
29/03/2016 15:18	AMAR375.9.20160329T151857Z.wav_chan0.xml	0	0
29/03/2016 15:33	AMAR375.9.20160329T153324Z.wav_chan0.xml	0	0
29/03/2016 15:47	AMAR375.9.20160329T154751Z.wav_chan0.xml	0	0
29/03/2016 16:02	AMAR375.9.20160329T160218Z.wav_chan0.xml	0	0
29/03/2016 16:16	AMAR375.9.20160329T161645Z.wav_chan0.xml	0	0
29/03/2016 16:31	AMAR375.9.20160329T163112Z.wav_chan0.xml	0	0
29/03/2016 16:45	AMAR375.9.20160329T164539Z.wav_chan0.xml	0	0
29/03/2016 17:00	AMAR375.9.20160329T170006Z.wav_chan0.xml	0	0
29/03/2016 17:14	AMAR375.9.20160329T171433Z.wav_chan0.xml	0	0
29/03/2016 17:29	AMAR375.9.20160329T172900Z.wav_chan0.xml	0	0
29/03/2016 17:43	AMAR375.9.20160329T174327Z.wav_chan0.xml	0	0
29/03/2016 17:57	AMAR375.9.20160329T175754Z.wav_chan0.xml	6	0
29/03/2016 18:12	AMAR375.9.20160329T181221Z.wav_chan0.xml	1	0
29/03/2016 18:26	AMAR375.9.20160329T182648Z.wav_chan0.xml	0	0
29/03/2016 18:41	AMAR375.9.20160329T184115Z.wav_chan0.xml	0	0
29/03/2016 18:55	AMAR375.9.20160329T185542Z.wav_chan0.xml	0	0
29/03/2016 19:10	AMAR375.9.20160329T191009Z.wav_chan0.xml	0	0
29/03/2016 19:24	AMAR375.9.20160329T192436Z.wav_chan0.xml	0	0
29/03/2016 19:39	AMAR375.9.20160329T193903Z.wav_chan0.xml	0	0
29/03/2016 19:53	AMAR375.9.20160329T195330Z.wav_chan0.xml	0	0
29/03/2016 20:07	AMAR375.9.20160329T200757Z.wav_chan0.xml	0	0
29/03/2016 20:22	AMAR375.9.20160329T202224Z.wav_chan0.xml	0	0
29/03/2016 20:36	AMAR375.9.20160329T203651Z.wav_chan0.xml	5	0
29/03/2016 20:51	AMAR375.9.20160329T205118Z.wav_chan0.xml	0	0
29/03/2016 21:05	AMAR375.9.20160329T210545Z.wav_chan0.xml	0	1
29/03/2016 21:20	AMAR375.9.20160329T212012Z.wav_chan0.xml	0	0
29/03/2016 21:34	AMAR375.9.20160329T213439Z.wav_chan0.xml	0	0
29/03/2016 21:49	AMAR375.9.20160329T214906Z.wav_chan0.xml	0	0
29/03/2016 22:03	AMAR375.9.20160329T220333Z.wav_chan0.xml	0	0
29/03/2016 22:18	AMAR375.9.20160329T221800Z.wav_chan0.xml	0	3
29/03/2016 22:32	AMAR375.9.20160329T223227Z.wav_chan0.xml	0	1
29/03/2016 22:46	AMAR375.9.20160329T224654Z.wav_chan0.xml	0	0
29/03/2016 23:01	AMAR375.9.20160329T230121Z.wav_chan0.xml	0	0
29/03/2016 23:15	AMAR375.9.20160329T231548Z.wav_chan0.xml	0	0
29/03/2016 23:30	AMAR375.9.20160329T233015Z.wav_chan0.xml	0	0
29/03/2016 23:44	AMAR375.9.20160329T234442Z.wav_chan0.xml	0	0
29/03/2016 23:59	AMAR375.9.20160329T235909Z.wav_chan0.xml	0	0
30/03/2016 0:13	AMAR375.9.20160330T001336Z.wav_chan0.xml	0	0
30/03/2016 0:28	AMAR375.9.20160330T002803Z.wav_chan0.xml	0	0
30/03/2016 0:42	AMAR375.9.20160330T004230Z.wav_chan0.xml	0	0
30/03/2016 0:56	AMAR375.9.20160330T005657Z.wav_chan0.xml	0	0
30/03/2016 1:11	AMAR375.9.20160330T011124Z.wav_chan0.xml	0	0
30/03/2016 1:25	AMAR375.9.20160330T012551Z.wav_chan0.xml	0	0
30/03/2016 1:40	AMAR375.9.20160330T014018Z.wav_chan0.xml	0	0
30/03/2016 1:54	AMAR375.9.20160330T015445Z.wav_chan0.xml	0	0
30/03/2016 2:09	AMAR375.9.20160330T020912Z.wav_chan0.xml	0	0
30/03/2016 2:23	AMAR375.9.20160330T022339Z.wav_chan0.xml	0	0
30/03/2016 2:38	AMAR375.9.20160330T023806Z.wav_chan0.xml	0	0
30/03/2016 2:52	AMAR375.9.20160330T025233Z.wav_chan0.xml	0	0
30/03/2016 3:07	AMAR375.9.20160330T030700Z.wav_chan0.xml	0	0
30/03/2016 3:21	AMAR375.9.20160330T032127Z.wav_chan0.xml	0	0
30/03/2016 3:35	AMAR375.9.20160330T033554Z.wav_chan0.xml	0	0
30/03/2016 3:50	AMAR375.9.20160330T035021Z.wav_chan0.xml	0	1
30/03/2016 4:04	AMAR375.9.20160330T040448Z.wav_chan0.xml	0	0
30/03/2016 4:19	AMAR375.9.20160330T041915Z.wav_chan0.xml	0	0
30/03/2016 4:33	AMAR375.9.20160330T043342Z.wav_chan0.xml	0	0
30/03/2016 4:48	AMAR375.9.20160330T044809Z.wav_chan0.xml	0	0
30/03/2016 5:02	AMAR375.9.20160330T050236Z.wav_chan0.xml	0	0
30/03/2016 5:17	AMAR375.9.20160330T051703Z.wav_chan0.xml	0	0
30/03/2016 5:31	AMAR375.9.20160330T053130Z.wav_chan0.xml	0	0
30/03/2016 5:45	AMAR375.9.20160330T054557Z.wav_chan0.xml	0	0
30/03/2016 6:00	AMAR375.9.20160330T060024Z.wav_chan0.xml	0	0
30/03/2016 6:14	AMAR375.9.20160330T061451Z.wav_chan0.xml	0	0
30/03/2016 6:29	AMAR375.9.20160330T062918Z.wav_chan0.xml	0	0
30/03/2016 6:43	AMAR375.9.20160330T064345Z.wav_chan0.xml	0	0
30/03/2016 6:58	AMAR375.9.20160330T065812Z.wav_chan0.xml	0	0
30/03/2016 7:12	AMAR375.9.20160330T071239Z.wav_chan0.xml	0	0
30/03/2016 7:27	AMAR375.9.20160330T072706Z.wav_chan0.xml	6	0
30/03/2016 7:41	AMAR375.9.20160330T074133Z.wav_chan0.xml	1	0
30/03/2016 7:56	AMAR375.9.20160330T075600Z.wav_chan0.xml	1	1
30/03/2016 8:10	AMAR375.9.20160330T081027Z.wav_chan0.xml	0	0
30/03/2016 8:24	AMAR375.9.20160330T082454Z.wav_chan0.xml	0	0
30/03/2016 8:39	AMAR375.9.20160330T083921Z.wav_chan0.xml	0	0
30/03/2016 8:53	AMAR375.9.20160330T085348Z.wav_chan0.xml	0	0
30/03/2016 9:08	AMAR375.9.20160330T090815Z.wav_chan0.xml	0	0
30/03/2016 9:22	AMAR375.9.20160330T092242Z.wav_chan0.xml	0	0
30/03/2016 9:37	AMAR375.9.20160330T093709Z.wav_chan0.xml	0	0
30/03/2016 9:51	AMAR375.9.20160330T095136Z.wav_chan0.xml	0	0
30/03/2016 10:06	AMAR375.9.20160330T100603Z.wav_chan0.xml	0	0
30/03/2016 10:20	AMAR375.9.20160330T102030Z.wav_chan0.xml	0	0
30/03/2016 10:34	AMAR375.9.20160330T103457Z.wav_chan0.xml	0	0
30/03/2016 10:49	AMAR375.9.20160330T104924Z.wav_chan0.xml	0	0
30/03/2016 11:03	AMAR375.9.20160330T110351Z.wav_chan0.xml	0	0
30/03/2016 11:18	AMAR375.9.20160330T111818Z.wav_chan0.xml	0	0
30/03/2016 11:32	AMAR375.9.20160330T113245Z.wav_chan0.xml	0	0
30/03/2016 11:47	AMAR375.9.20160330T114712Z.wav_chan0.xml	0	0
30/03/2016 12:01	AMAR375.9.20160330T120139Z.wav_chan0.xml	0	0
30/03/2016 12:16	AMAR375.9.20160330T121606Z.wav_chan0.xml	0	0
30/03/2016 12:30	AMAR375.9.20160330T123033Z.wav_chan0.xml	0	0
30/03/2016 12:45	AMAR375.9.20160330T124500Z.wav_chan0.xml	0	0
30/03/2016 12:59	AMAR375.9.20160330T125927Z.wav_chan0.xml	0	0
30/03/2016 13:13	AMAR375.9.20160330T131354Z.wav_chan0.xml	0	0
30/03/2016 13:28	AMAR375.9.20160330T132821Z.wav_chan0.xml	0	0
30/03/2016 13:42	AMAR375.9.20160330T134248Z.wav_chan0.xml	0	0
30/03/2016 13:57	AMAR375.9.20160330T135715Z.wav_chan0.xml	0	0
30/03/2016 14:11	AMAR375.9.20160330T141142Z.wav_chan0.xml	0	0
30/03/2016 14:26	AMAR375.9.20160330T142609Z.wav_chan0.xml	0	0
30/03/2016 14:40	AMAR375.9.20160330T144036Z.wav_chan0.xml	0	0
30/03/2016 14:55	AMAR375.9.20160330T145503Z.wav_chan0.xml	0	0
30/03/2016 15:09	AMAR375.9.20160330T150930Z.wav_chan0.xml	0	0
30/03/2016 15:23	AMAR375.9.20160330T152357Z.wav_chan0.xml	0	0
30/03/2016 15:38	AMAR375.9.20160330T153824Z.wav_chan0.xml	0	0
30/03/2016 15:52	AMAR375.9.20160330T155251Z.wav_chan0.xml	2	0
30/03/2016 16:07	AMAR375.9.20160330T160718Z.wav_chan0.xml	0	0
30/03/2016 16:21	AMAR375.9.20160330T162145Z.wav_chan0.xml	0	0
30/03/2016 16:36	AMAR375.9.20160330T163612Z.wav_chan0.xml	0	0
30/03/2016 16:50	AMAR375.9.20160330T165039Z.wav_chan0.xml	0	0
30/03/2016 17:05	AMAR375.9.20160330T170506Z.wav_chan0.xml	0	0
30/03/2016 17:19	AMAR375.9.20160330T171933Z.wav_chan0.xml	0	0
30/03/2016 17:34	AMAR375.9.20160330T173400Z.wav_chan0.xml	0	0
30/03/2016 17:48	AMAR375.9.20160330T174827Z.wav_chan0.xml	0	0
30/03/2016 18:02	AMAR375.9.20160330T180254Z.wav_chan0.xml	1	0
30/03/2016 18:17	AMAR375.9.20160330T181721Z.wav_chan0.xml	2	0
30/03/2016 18:31	AMAR375.9.20160330T183148Z.wav_chan0.xml	0	0
30/03/2016 18:46	AMAR375.9.20160330T184615Z.wav_chan0.xml	0	0
30/03/2016 19:00	AMAR375.9.20160330T190042Z.wav_chan0.xml	0	0
30/03/2016 19:15	AMAR375.9.20160330T191509Z.wav_chan0.xml	0	0
30/03/2016 19:29	AMAR375.9.20160330T192936Z.wav_chan0.xml	0	0
30/03/2016 19:44	AMAR375.9.20160330T194403Z.wav_chan0.xml	0	0
30/03/2016 19:58	AMAR375.9.20160330T195830Z.wav_chan0.xml	0	0
30/03/2016 20:12	AMAR375.9.20160330T201257Z.wav_chan0.xml	0	0
30/03/2016 20:27	AMAR375.9.20160330T202724Z.wav_chan0.xml	0	0
30/03/2016 20:41	AMAR375.9.20160330T204151Z.wav_chan0.xml	0	0
30/03/2016 20:56	AMAR375.9.20160330T205618Z.wav_chan0.xml	0	0
30/03/2016 21:10	AMAR375.9.20160330T211045Z.wav_chan0.xml	0	0
30/03/2016 21:25	AMAR375.9.20160330T212512Z.wav_chan0.xml	0	0
30/03/2016 21:39	AMAR375.9.20160330T213939Z.wav_chan0.xml	0	0
30/03/2016 21:54	AMAR375.9.20160330T215406Z.wav_chan0.xml	0	0
30/03/2016 22:08	AMAR375.9.20160330T220833Z.wav_chan0.xml	0	0
30/03/2016 22:23	AMAR375.9.20160330T222300Z.wav_chan0.xml	0	0
30/03/2016 22:37	AMAR375.9.20160330T223727Z.wav_chan0.xml	0	0
30/03/2016 22:51	AMAR375.9.20160330T225154Z.wav_chan0.xml	0	0
30/03/2016 23:06	AMAR375.9.20160330T230621Z.wav_chan0.xml	0	0
30/03/2016 23:20	AMAR375.9.20160330T232048Z.wav_chan0.xml	0	0
30/03/2016 23:35	AMAR375.9.20160330T233515Z.wav_chan0.xml	6	0
30/03/2016 23:49	AMAR375.9.20160330T234942Z.wav_chan0.xml	0	0
31/03/2016 0:04	AMAR375.9.20160331T000409Z.wav_chan0.xml	0	0
31/03/2016 0:18	AMAR375.9.20160331T001836Z.wav_chan0.xml	0	0
31/03/2016 0:33	AMAR375.9.20160331T003303Z.wav_chan0.xml	0	0
31/03/2016 0:47	AMAR375.9.20160331T004730Z.wav_chan0.xml	0	0
31/03/2016 1:01	AMAR375.9.20160331T010157Z.wav_chan0.xml	0	0
31/03/2016 1:16	AMAR375.9.20160331T011624Z.wav_chan0.xml	0	0
31/03/2016 1:30	AMAR375.9.20160331T013051Z.wav_chan0.xml	0	0
31/03/2016 1:45	AMAR375.9.20160331T014518Z.wav_chan0.xml	0	0
31/03/2016 1:59	AMAR375.9.20160331T015945Z.wav_chan0.xml	0	0
31/03/2016 2:14	AMAR375.9.20160331T021412Z.wav_chan0.xml	0	0
31/03/2016 2:28	AMAR375.9.20160331T022839Z.wav_chan0.xml	0	0
31/03/2016 2:43	AMAR375.9.20160331T024306Z.wav_chan0.xml	0	0
31/03/2016 2:57	AMAR375.9.20160331T025733Z.wav_chan0.xml	0	0
31/03/2016 3:12	AMAR375.9.20160331T031200Z.wav_chan0.xml	0	0
31/03/2016 3:26	AMAR375.9.20160331T032627Z.wav_chan0.xml	0	0
31/03/2016 3:40	AMAR375.9.20160331T034054Z.wav_chan0.xml	0	0
31/03/2016 3:55	AMAR375.9.20160331T035521Z.wav_chan0.xml	0	0
31/03/2016 4:09	AMAR375.9.20160331T040948Z.wav_chan0.xml	0	0
31/03/2016 4:24	AMAR375.9.20160331T042415Z.wav_chan0.xml	0	0
31/03/2016 4:38	AMAR375.9.20160331T043842Z.wav_chan0.xml	0	0
31/03/2016 4:53	AMAR375.9.20160331T045309Z.wav_chan0.xml	0	0
31/03/2016 5:07	AMAR375.9.20160331T050736Z.wav_chan0.xml	0	0
31/03/2016 5:22	AMAR375.9.20160331T052203Z.wav_chan0.xml	0	0
31/03/2016 5:36	AMAR375.9.20160331T053630Z.wav_chan0.xml	0	0
31/03/2016 5:50	AMAR375.9.20160331T055057Z.wav_chan0.xml	0	0
31/03/2016 6:05	AMAR375.9.20160331T060524Z.wav_chan0.xml	0	0
31/03/2016 6:19	AMAR375.9.20160331T061951Z.wav_chan0.xml	0	0
31/03/2016 6:34	AMAR375.9.20160331T063418Z.wav_chan0.xml	0	0
31/03/2016 6:48	AMAR375.9.20160331T064845Z.wav_chan0.xml	0	0
31/03/2016 7:03	AMAR375.9.20160331T070312Z.wav_chan0.xml	0	0
31/03/2016 7:17	AMAR375.9.20160331T071739Z.wav_chan0.xml	0	0
31/03/2016 7:32	AMAR375.9.20160331T073206Z.wav_chan0.xml	0	0
31/03/2016 7:46	AMAR375.9.20160331T074633Z.wav_chan0.xml	0	0
31/03/2016 8:01	AMAR375.9.20160331T080100Z.wav_chan0.xml	0	0
31/03/2016 8:15	AMAR375.9.20160331T081527Z.wav_chan0.xml	0	0
31/03/2016 8:29	AMAR375.9.20160331T082954Z.wav_chan0.xml	0	0
31/03/2016 8:44	AMAR375.9.20160331T084421Z.wav_chan0.xml	0	0
31/03/2016 8:58	AMAR375.9.20160331T085848Z.wav_chan0.xml	0	0
31/03/2016 9:13	AMAR375.9.20160331T091315Z.wav_chan0.xml	0	0
31/03/2016 9:27	AMAR375.9.20160331T092742Z.wav_chan0.xml	0	0
31/03/2016 9:42	AMAR375.9.20160331T094209Z.wav_chan0.xml	0	0
31/03/2016 9:56	AMAR375.9.20160331T095636Z.wav_chan0.xml	0	0
31/03/2016 10:11	AMAR375.9.20160331T101103Z.wav_chan0.xml	0	0
31/03/2016 10:25	AMAR375.9.20160331T102530Z.wav_chan0.xml	0	0
31/03/2016 10:39	AMAR375.9.20160331T103957Z.wav_chan0.xml	0	0
31/03/2016 10:54	AMAR375.9.20160331T105424Z.wav_chan0.xml	0	0
31/03/2016 11:08	AMAR375.9.20160331T110851Z.wav_chan0.xml	0	0
31/03/2016 11:23	AMAR375.9.20160331T112318Z.wav_chan0.xml	0	0
31/03/2016 11:37	AMAR375.9.20160331T113745Z.wav_chan0.xml	0	0
31/03/2016 11:52	AMAR375.9.20160331T115212Z.wav_chan0.xml	0	0
31/03/2016 12:06	AMAR375.9.20160331T120639Z.wav_chan0.xml	0	0
31/03/2016 12:21	AMAR375.9.20160331T122106Z.wav_chan0.xml	0	0
31/03/2016 12:35	AMAR375.9.20160331T123533Z.wav_chan0.xml	0	0
31/03/2016 12:50	AMAR375.9.20160331T125000Z.wav_chan0.xml	0	0
31/03/2016 13:04	AMAR375.9.20160331T130427Z.wav_chan0.xml	0	0
31/03/2016 13:18	AMAR375.9.20160331T131854Z.wav_chan0.xml	0	0
31/03/2016 13:33	AMAR375.9.20160331T133321Z.wav_chan0.xml	0	0
31/03/2016 13:47	AMAR375.9.20160331T134748Z.wav_chan0.xml	1	0
31/03/2016 14:02	AMAR375.9.20160331T140215Z.wav_chan0.xml	0	0
31/03/2016 14:16	AMAR375.9.20160331T141642Z.wav_chan0.xml	0	0
31/03/2016 14:31	AMAR375.9.20160331T143109Z.wav_chan0.xml	0	0
31/03/2016 14:45	AMAR375.9.20160331T144536Z.wav_chan0.xml	0	0
31/03/2016 15:00	AMAR375.9.20160331T150003Z.wav_chan0.xml	0	0
31/03/2016 15:14	AMAR375.9.20160331T151430Z.wav_chan0.xml	0	0
31/03/2016 15:28	AMAR375.9.20160331T152857Z.wav_chan0.xml	0	0
31/03/2016 15:43	AMAR375.9.20160331T154324Z.wav_chan0.xml	0	0
31/03/2016 15:57	AMAR375.9.20160331T155751Z.wav_chan0.xml	0	0
31/03/2016 16:12	AMAR375.9.20160331T161218Z.wav_chan0.xml	0	0
31/03/2016 16:26	AMAR375.9.20160331T162645Z.wav_chan0.xml	0	0
31/03/2016 16:41	AMAR375.9.20160331T164112Z.wav_chan0.xml	0	0
31/03/2016 16:55	AMAR375.9.20160331T165539Z.wav_chan0.xml	0	0
31/03/2016 17:10	AMAR375.9.20160331T171006Z.wav_chan0.xml	0	0
31/03/2016 17:24	AMAR375.9.20160331T172433Z.wav_chan0.xml	0	0
31/03/2016 17:39	AMAR375.9.20160331T173900Z.wav_chan0.xml	0	0
31/03/2016 17:53	AMAR375.9.20160331T175327Z.wav_chan0.xml	0	0
31/03/2016 18:07	AMAR375.9.20160331T180754Z.wav_chan0.xml	0	0
31/03/2016 18:22	AMAR375.9.20160331T182221Z.wav_chan0.xml	0	0
31/03/2016 18:36	AMAR375.9.20160331T183648Z.wav_chan0.xml	0	0
31/03/2016 18:51	AMAR375.9.20160331T185115Z.wav_chan0.xml	0	0
31/03/2016 19:05	AMAR375.9.20160331T190542Z.wav_chan0.xml	0	0
31/03/2016 19:20	AMAR375.9.20160331T192009Z.wav_chan0.xml	0	0
31/03/2016 19:34	AMAR375.9.20160331T193436Z.wav_chan0.xml	0	0
31/03/2016 19:49	AMAR375.9.20160331T194903Z.wav_chan0.xml	0	0
31/03/2016 20:03	AMAR375.9.20160331T200330Z.wav_chan0.xml	0	0
31/03/2016 20:17	AMAR375.9.20160331T201757Z.wav_chan0.xml	0	0
31/03/2016 20:32	AMAR375.9.20160331T203224Z.wav_chan0.xml	0	0
31/03/2016 20:46	AMAR375.9.20160331T204651Z.wav_chan0.xml	0	0
31/03/2016 21:01	AMAR375.9.20160331T210118Z.wav_chan0.xml	0	0
31/03/2016 21:15	AMAR375.9.20160331T211545Z.wav_chan0.xml	0	0
31/03/2016 21:30	AMAR375.9.20160331T213012Z.wav_chan0.xml	0	0
31/03/2016 21:44	AMAR375.9.20160331T214439Z.wav_chan0.xml	0	0
31/03/2016 21:59	AMAR375.9.20160331T215906Z.wav_chan0.xml	0	0
31/03/2016 22:13	AMAR375.9.20160331T221333Z.wav_chan0.xml	0	0
31/03/2016 22:28	AMAR375.9.20160331T222800Z.wav_chan0.xml	0	1
31/03/2016 22:42	AMAR375.9.20160331T224227Z.wav_chan0.xml	0	0
31/03/2016 22:56	AMAR375.9.20160331T225654Z.wav_chan0.xml	0	0
31/03/2016 23:11	AMAR375.9.20160331T231121Z.wav_chan0.xml	0	0
31/03/2016 23:25	AMAR375.9.20160331T232548Z.wav_chan0.xml	0	0
31/03/2016 23:40	AMAR375.9.20160331T234015Z.wav_chan0.xml	0	0
31/03/2016 23:54	AMAR375.9.20160331T235442Z.wav_chan0.xml	0	0
01/04/2016 0:09	AMAR375.9.20160401T000909Z.wav_chan0.xml	0	0
01/04/2016 0:23	AMAR375.9.20160401T002336Z.wav_chan0.xml	0	0
01/04/2016 0:38	AMAR375.9.20160401T003803Z.wav_chan0.xml	0	0
01/04/2016 0:52	AMAR375.9.20160401T005230Z.wav_chan0.xml	0	0
01/04/2016 1:06	AMAR375.9.20160401T010657Z.wav_chan0.xml	0	0
01/04/2016 1:21	AMAR375.9.20160401T012124Z.wav_chan0.xml	0	0
01/04/2016 1:35	AMAR375.9.20160401T013551Z.wav_chan0.xml	0	0
01/04/2016 1:50	AMAR375.9.20160401T015018Z.wav_chan0.xml	0	0
01/04/2016 2:04	AMAR375.9.20160401T020445Z.wav_chan0.xml	0	0
01/04/2016 2:19	AMAR375.9.20160401T021912Z.wav_chan0.xml	0	0
01/04/2016 2:33	AMAR375.9.20160401T023339Z.wav_chan0.xml	0	0
01/04/2016 2:48	AMAR375.9.20160401T024806Z.wav_chan0.xml	0	0
01/04/2016 3:02	AMAR375.9.20160401T030233Z.wav_chan0.xml	0	0
01/04/2016 3:17	AMAR375.9.20160401T031700Z.wav_chan0.xml	0	0
01/04/2016 3:31	AMAR375.9.20160401T033127Z.wav_chan0.xml	15	0
01/04/2016 3:45	AMAR375.9.20160401T034554Z.wav_chan0.xml	0	0
01/04/2016 4:00	AMAR375.9.20160401T040021Z.wav_chan0.xml	0	0
01/04/2016 4:14	AMAR375.9.20160401T041448Z.wav_chan0.xml	0	0
01/04/2016 4:29	AMAR375.9.20160401T042915Z.wav_chan0.xml	0	0
01/04/2016 4:43	AMAR375.9.20160401T044342Z.wav_chan0.xml	0	0
01/04/2016 4:58	AMAR375.9.20160401T045809Z.wav_chan0.xml	0	0
01/04/2016 5:12	AMAR375.9.20160401T051236Z.wav_chan0.xml	0	1
01/04/2016 5:27	AMAR375.9.20160401T052703Z.wav_chan0.xml	0	0
01/04/2016 5:41	AMAR375.9.20160401T054130Z.wav_chan0.xml	8	0
01/04/2016 5:55	AMAR375.9.20160401T055557Z.wav_chan0.xml	5	0
01/04/2016 6:10	AMAR375.9.20160401T061024Z.wav_chan0.xml	0	0
01/04/2016 6:24	AMAR375.9.20160401T062451Z.wav_chan0.xml	0	0
01/04/2016 6:39	AMAR375.9.20160401T063918Z.wav_chan0.xml	0	0
01/04/2016 6:53	AMAR375.9.20160401T065345Z.wav_chan0.xml	0	0
01/04/2016 7:08	AMAR375.9.20160401T070812Z.wav_chan0.xml	0	0
01/04/2016 7:22	AMAR375.9.20160401T072239Z.wav_chan0.xml	0	0
01/04/2016 7:37	AMAR375.9.20160401T073706Z.wav_chan0.xml	0	0
01/04/2016 7:51	AMAR375.9.20160401T075133Z.wav_chan0.xml	0	0
01/04/2016 8:06	AMAR375.9.20160401T080600Z.wav_chan0.xml	0	0
01/04/2016 8:20	AMAR375.9.20160401T082027Z.wav_chan0.xml	0	0
01/04/2016 8:34	AMAR375.9.20160401T083454Z.wav_chan0.xml	18	0
01/04/2016 8:49	AMAR375.9.20160401T084921Z.wav_chan0.xml	6	0
01/04/2016 9:03	AMAR375.9.20160401T090348Z.wav_chan0.xml	0	0
01/04/2016 9:18	AMAR375.9.20160401T091815Z.wav_chan0.xml	0	0
01/04/2016 9:32	AMAR375.9.20160401T093242Z.wav_chan0.xml	0	0
01/04/2016 9:47	AMAR375.9.20160401T094709Z.wav_chan0.xml	0	0
01/04/2016 10:01	AMAR375.9.20160401T100136Z.wav_chan0.xml	0	0
01/04/2016 10:16	AMAR375.9.20160401T101603Z.wav_chan0.xml	0	0
01/04/2016 10:30	AMAR375.9.20160401T103030Z.wav_chan0.xml	0	0
01/04/2016 10:44	AMAR375.9.20160401T104457Z.wav_chan0.xml	0	0
01/04/2016 10:59	AMAR375.9.20160401T105924Z.wav_chan0.xml	0	0
01/04/2016 11:13	AMAR375.9.20160401T111351Z.wav_chan0.xml	4	0
01/04/2016 11:28	AMAR375.9.20160401T112818Z.wav_chan0.xml	0	0
01/04/2016 11:42	AMAR375.9.20160401T114245Z.wav_chan0.xml	0	0
01/04/2016 11:57	AMAR375.9.20160401T115712Z.wav_chan0.xml	0	0
01/04/2016 12:11	AMAR375.9.20160401T121139Z.wav_chan0.xml	0	0
01/04/2016 12:26	AMAR375.9.20160401T122606Z.wav_chan0.xml	0	1
01/04/2016 12:40	AMAR375.9.20160401T124033Z.wav_chan0.xml	0	0
01/04/2016 12:55	AMAR375.9.20160401T125500Z.wav_chan0.xml	0	0
01/04/2016 13:09	AMAR375.9.20160401T130927Z.wav_chan0.xml	0	0
01/04/2016 13:23	AMAR375.9.20160401T132354Z.wav_chan0.xml	0	0
01/04/2016 13:38	AMAR375.9.20160401T133821Z.wav_chan0.xml	0	0
01/04/2016 13:52	AMAR375.9.20160401T135248Z.wav_chan0.xml	0	0
01/04/2016 14:07	AMAR375.9.20160401T140715Z.wav_chan0.xml	0	0
01/04/2016 14:21	AMAR375.9.20160401T142142Z.wav_chan0.xml	0	0
01/04/2016 14:36	AMAR375.9.20160401T143609Z.wav_chan0.xml	0	0
01/04/2016 14:50	AMAR375.9.20160401T145036Z.wav_chan0.xml	0	0
01/04/2016 15:05	AMAR375.9.20160401T150503Z.wav_chan0.xml	0	0
01/04/2016 15:19	AMAR375.9.20160401T151930Z.wav_chan0.xml	0	0
01/04/2016 15:33	AMAR375.9.20160401T153357Z.wav_chan0.xml	0	0
01/04/2016 15:48	AMAR375.9.20160401T154824Z.wav_chan0.xml	0	0
01/04/2016 16:02	AMAR375.9.20160401T160251Z.wav_chan0.xml	0	0
01/04/2016 16:17	AMAR375.9.20160401T161718Z.wav_chan0.xml	0	0
01/04/2016 16:31	AMAR375.9.20160401T163145Z.wav_chan0.xml	0	0
01/04/2016 16:46	AMAR375.9.20160401T164612Z.wav_chan0.xml	0	0
01/04/2016 17:00	AMAR375.9.20160401T170039Z.wav_chan0.xml	0	0
01/04/2016 17:15	AMAR375.9.20160401T171506Z.wav_chan0.xml	0	0
01/04/2016 17:29	AMAR375.9.20160401T172933Z.wav_chan0.xml	0	0
01/04/2016 17:44	AMAR375.9.20160401T174400Z.wav_chan0.xml	0	0
01/04/2016 17:58	AMAR375.9.20160401T175827Z.wav_chan0.xml	0	0
01/04/2016 18:12	AMAR375.9.20160401T181254Z.wav_chan0.xml	12	0
01/04/2016 18:27	AMAR375.9.20160401T182721Z.wav_chan0.xml	0	0
01/04/2016 18:41	AMAR375.9.20160401T184148Z.wav_chan0.xml	0	0
01/04/2016 18:56	AMAR375.9.20160401T185615Z.wav_chan0.xml	0	0
01/04/2016 19:10	AMAR375.9.20160401T191042Z.wav_chan0.xml	0	0
01/04/2016 19:25	AMAR375.9.20160401T192509Z.wav_chan0.xml	0	0
01/04/2016 19:39	AMAR375.9.20160401T193936Z.wav_chan0.xml	0	0
01/04/2016 19:54	AMAR375.9.20160401T195403Z.wav_chan0.xml	0	0
01/04/2016 20:08	AMAR375.9.20160401T200830Z.wav_chan0.xml	0	0
01/04/2016 20:22	AMAR375.9.20160401T202257Z.wav_chan0.xml	1	0
01/04/2016 20:37	AMAR375.9.20160401T203724Z.wav_chan0.xml	0	0
01/04/2016 20:51	AMAR375.9.20160401T205151Z.wav_chan0.xml	0	0
01/04/2016 21:06	AMAR375.9.20160401T210618Z.wav_chan0.xml	0	0
01/04/2016 21:20	AMAR375.9.20160401T212045Z.wav_chan0.xml	0	0
01/04/2016 21:35	AMAR375.9.20160401T213512Z.wav_chan0.xml	0	0
01/04/2016 21:49	AMAR375.9.20160401T214939Z.wav_chan0.xml	0	0
01/04/2016 22:04	AMAR375.9.20160401T220406Z.wav_chan0.xml	13	0
01/04/2016 22:18	AMAR375.9.20160401T221833Z.wav_chan0.xml	6	0
01/04/2016 22:33	AMAR375.9.20160401T223300Z.wav_chan0.xml	4	0
01/04/2016 22:47	AMAR375.9.20160401T224727Z.wav_chan0.xml	5	0
01/04/2016 23:01	AMAR375.9.20160401T230154Z.wav_chan0.xml	0	0
01/04/2016 23:16	AMAR375.9.20160401T231621Z.wav_chan0.xml	0	0
01/04/2016 23:30	AMAR375.9.20160401T233048Z.wav_chan0.xml	0	0
01/04/2016 23:45	AMAR375.9.20160401T234515Z.wav_chan0.xml	0	0
01/04/2016 23:59	AMAR375.9.20160401T235942Z.wav_chan0.xml	0	0
02/04/2016 0:14	AMAR375.9.20160402T001409Z.wav_chan0.xml	0	0
02/04/2016 0:28	AMAR375.9.20160402T002836Z.wav_chan0.xml	0	0
02/04/2016 0:43	AMAR375.9.20160402T004303Z.wav_chan0.xml	0	0
02/04/2016 0:57	AMAR375.9.20160402T005730Z.wav_chan0.xml	0	0
02/04/2016 1:11	AMAR375.9.20160402T011157Z.wav_chan0.xml	0	0
02/04/2016 1:26	AMAR375.9.20160402T012624Z.wav_chan0.xml	0	0
02/04/2016 1:40	AMAR375.9.20160402T014051Z.wav_chan0.xml	0	0
02/04/2016 1:55	AMAR375.9.20160402T015518Z.wav_chan0.xml	0	0
02/04/2016 2:09	AMAR375.9.20160402T020945Z.wav_chan0.xml	0	0
02/04/2016 2:24	AMAR375.9.20160402T022412Z.wav_chan0.xml	0	0
02/04/2016 2:38	AMAR375.9.20160402T023839Z.wav_chan0.xml	0	0
02/04/2016 2:53	AMAR375.9.20160402T025306Z.wav_chan0.xml	0	0
02/04/2016 3:07	AMAR375.9.20160402T030733Z.wav_chan0.xml	0	0
02/04/2016 3:22	AMAR375.9.20160402T032200Z.wav_chan0.xml	0	0
02/04/2016 3:36	AMAR375.9.20160402T033627Z.wav_chan0.xml	0	0
02/04/2016 3:50	AMAR375.9.20160402T035054Z.wav_chan0.xml	0	0
02/04/2016 4:05	AMAR375.9.20160402T040521Z.wav_chan0.xml	0	0
02/04/2016 4:19	AMAR375.9.20160402T041948Z.wav_chan0.xml	0	0
02/04/2016 4:34	AMAR375.9.20160402T043415Z.wav_chan0.xml	0	0
02/04/2016 4:48	AMAR375.9.20160402T044842Z.wav_chan0.xml	0	0
02/04/2016 5:03	AMAR375.9.20160402T050309Z.wav_chan0.xml	0	0
02/04/2016 5:17	AMAR375.9.20160402T051736Z.wav_chan0.xml	0	0
02/04/2016 5:32	AMAR375.9.20160402T053203Z.wav_chan0.xml	0	0
02/04/2016 5:46	AMAR375.9.20160402T054630Z.wav_chan0.xml	0	0
02/04/2016 6:00	AMAR375.9.20160402T060057Z.wav_chan0.xml	0	0
02/04/2016 6:15	AMAR375.9.20160402T061524Z.wav_chan0.xml	0	0
02/04/2016 6:29	AMAR375.9.20160402T062951Z.wav_chan0.xml	0	0
02/04/2016 6:44	AMAR375.9.20160402T064418Z.wav_chan0.xml	0	0
02/04/2016 6:58	AMAR375.9.20160402T065845Z.wav_chan0.xml	0	0
02/04/2016 7:13	AMAR375.9.20160402T071312Z.wav_chan0.xml	0	0
02/04/2016 7:27	AMAR375.9.20160402T072739Z.wav_chan0.xml	0	0
02/04/2016 7:42	AMAR375.9.20160402T074206Z.wav_chan0.xml	0	0
02/04/2016 7:56	AMAR375.9.20160402T075633Z.wav_chan0.xml	0	0
02/04/2016 8:11	AMAR375.9.20160402T081100Z.wav_chan0.xml	0	0
02/04/2016 8:25	AMAR375.9.20160402T082527Z.wav_chan0.xml	0	0
02/04/2016 8:39	AMAR375.9.20160402T083954Z.wav_chan0.xml	0	0
02/04/2016 8:54	AMAR375.9.20160402T085421Z.wav_chan0.xml	0	0
02/04/2016 9:08	AMAR375.9.20160402T090848Z.wav_chan0.xml	0	0
02/04/2016 9:23	AMAR375.9.20160402T092315Z.wav_chan0.xml	0	0
02/04/2016 9:37	AMAR375.9.20160402T093742Z.wav_chan0.xml	0	0
02/04/2016 9:52	AMAR375.9.20160402T095209Z.wav_chan0.xml	0	0
02/04/2016 10:06	AMAR375.9.20160402T100636Z.wav_chan0.xml	0	0
02/04/2016 10:21	AMAR375.9.20160402T102103Z.wav_chan0.xml	0	0
02/04/2016 10:35	AMAR375.9.20160402T103530Z.wav_chan0.xml	0	0
02/04/2016 10:49	AMAR375.9.20160402T104957Z.wav_chan0.xml	0	0
02/04/2016 11:04	AMAR375.9.20160402T110424Z.wav_chan0.xml	0	0
02/04/2016 11:18	AMAR375.9.20160402T111851Z.wav_chan0.xml	0	0
02/04/2016 11:33	AMAR375.9.20160402T113318Z.wav_chan0.xml	0	0
02/04/2016 11:47	AMAR375.9.20160402T114745Z.wav_chan0.xml	0	0
02/04/2016 12:02	AMAR375.9.20160402T120212Z.wav_chan0.xml	0	0
02/04/2016 12:16	AMAR375.9.20160402T121639Z.wav_chan0.xml	0	0
02/04/2016 12:31	AMAR375.9.20160402T123106Z.wav_chan0.xml	0	0
02/04/2016 12:45	AMAR375.9.20160402T124533Z.wav_chan0.xml	0	0
02/04/2016 13:00	AMAR375.9.20160402T130000Z.wav_chan0.xml	0	0
02/04/2016 13:14	AMAR375.9.20160402T131427Z.wav_chan0.xml	0	0
02/04/2016 13:28	AMAR375.9.20160402T132854Z.wav_chan0.xml	1	0
02/04/2016 13:43	AMAR375.9.20160402T134321Z.wav_chan0.xml	0	0
02/04/2016 13:57	AMAR375.9.20160402T135748Z.wav_chan0.xml	0	0
02/04/2016 14:12	AMAR375.9.20160402T141215Z.wav_chan0.xml	0	0
02/04/2016 14:26	AMAR375.9.20160402T142642Z.wav_chan0.xml	0	0
02/04/2016 14:41	AMAR375.9.20160402T144109Z.wav_chan0.xml	0	0
02/04/2016 14:55	AMAR375.9.20160402T145536Z.wav_chan0.xml	0	0
02/04/2016 15:10	AMAR375.9.20160402T151003Z.wav_chan0.xml	0	0
02/04/2016 15:24	AMAR375.9.20160402T152430Z.wav_chan0.xml	0	0
02/04/2016 15:38	AMAR375.9.20160402T153857Z.wav_chan0.xml	0	0
02/04/2016 15:53	AMAR375.9.20160402T155324Z.wav_chan0.xml	0	0
02/04/2016 16:07	AMAR375.9.20160402T160751Z.wav_chan0.xml	0	0
02/04/2016 16:22	AMAR375.9.20160402T162218Z.wav_chan0.xml	0	0
02/04/2016 16:36	AMAR375.9.20160402T163645Z.wav_chan0.xml	0	0
02/04/2016 16:51	AMAR375.9.20160402T165112Z.wav_chan0.xml	0	0
02/04/2016 17:05	AMAR375.9.20160402T170539Z.wav_chan0.xml	0	0
02/04/2016 17:20	AMAR375.9.20160402T172006Z.wav_chan0.xml	0	0
02/04/2016 17:34	AMAR375.9.20160402T173433Z.wav_chan0.xml	0	0
02/04/2016 17:49	AMAR375.9.20160402T174900Z.wav_chan0.xml	0	0
02/04/2016 18:03	AMAR375.9.20160402T180327Z.wav_chan0.xml	0	0
02/04/2016 18:17	AMAR375.9.20160402T181754Z.wav_chan0.xml	0	0
02/04/2016 18:32	AMAR375.9.20160402T183221Z.wav_chan0.xml	0	0
02/04/2016 18:46	AMAR375.9.20160402T184648Z.wav_chan0.xml	0	0
02/04/2016 19:01	AMAR375.9.20160402T190115Z.wav_chan0.xml	0	0
02/04/2016 19:15	AMAR375.9.20160402T191542Z.wav_chan0.xml	0	0
02/04/2016 19:30	AMAR375.9.20160402T193009Z.wav_chan0.xml	0	0
02/04/2016 19:44	AMAR375.9.20160402T194436Z.wav_chan0.xml	0	0
02/04/2016 19:59	AMAR375.9.20160402T195903Z.wav_chan0.xml	0	0
02/04/2016 20:13	AMAR375.9.20160402T201330Z.wav_chan0.xml	0	0
02/04/2016 20:27	AMAR375.9.20160402T202757Z.wav_chan0.xml	0	0
02/04/2016 20:42	AMAR375.9.20160402T204224Z.wav_chan0.xml	0	0
02/04/2016 20:56	AMAR375.9.20160402T205651Z.wav_chan0.xml	0	0
02/04/2016 21:11	AMAR375.9.20160402T211118Z.wav_chan0.xml	0	0
02/04/2016 21:25	AMAR375.9.20160402T212545Z.wav_chan0.xml	0	0
02/04/2016 21:40	AMAR375.9.20160402T214012Z.wav_chan0.xml	4	0
02/04/2016 21:54	AMAR375.9.20160402T215439Z.wav_chan0.xml	15	0
02/04/2016 22:09	AMAR375.9.20160402T220906Z.wav_chan0.xml	13	0
02/04/2016 22:23	AMAR375.9.20160402T222333Z.wav_chan0.xml	0	0
02/04/2016 22:38	AMAR375.9.20160402T223800Z.wav_chan0.xml	0	0
02/04/2016 22:52	AMAR375.9.20160402T225227Z.wav_chan0.xml	0	0
02/04/2016 23:06	AMAR375.9.20160402T230654Z.wav_chan0.xml	0	0
02/04/2016 23:21	AMAR375.9.20160402T232121Z.wav_chan0.xml	0	0
02/04/2016 23:35	AMAR375.9.20160402T233548Z.wav_chan0.xml	0	0
02/04/2016 23:50	AMAR375.9.20160402T235015Z.wav_chan0.xml	0	0
03/04/2016 0:04	AMAR375.9.20160403T000442Z.wav_chan0.xml	0	0
03/04/2016 0:19	AMAR375.9.20160403T001909Z.wav_chan0.xml	6	0
03/04/2016 0:33	AMAR375.9.20160403T003336Z.wav_chan0.xml	0	0
03/04/2016 0:48	AMAR375.9.20160403T004803Z.wav_chan0.xml	0	0
03/04/2016 1:02	AMAR375.9.20160403T010230Z.wav_chan0.xml	0	0
03/04/2016 1:16	AMAR375.9.20160403T011657Z.wav_chan0.xml	0	0
03/04/2016 1:31	AMAR375.9.20160403T013124Z.wav_chan0.xml	0	0
03/04/2016 1:45	AMAR375.9.20160403T014551Z.wav_chan0.xml	0	0
03/04/2016 2:00	AMAR375.9.20160403T020018Z.wav_chan0.xml	3	0
03/04/2016 2:14	AMAR375.9.20160403T021445Z.wav_chan0.xml	9	1
03/04/2016 2:29	AMAR375.9.20160403T022912Z.wav_chan0.xml	2	0
03/04/2016 2:43	AMAR375.9.20160403T024339Z.wav_chan0.xml	0	0
03/04/2016 2:58	AMAR375.9.20160403T025806Z.wav_chan0.xml	0	0
03/04/2016 3:12	AMAR375.9.20160403T031233Z.wav_chan0.xml	0	0
03/04/2016 3:27	AMAR375.9.20160403T032700Z.wav_chan0.xml	0	0
03/04/2016 3:41	AMAR375.9.20160403T034127Z.wav_chan0.xml	0	0
03/04/2016 3:55	AMAR375.9.20160403T035554Z.wav_chan0.xml	4	0
03/04/2016 4:10	AMAR375.9.20160403T041021Z.wav_chan0.xml	2	0
03/04/2016 4:24	AMAR375.9.20160403T042448Z.wav_chan0.xml	0	0
03/04/2016 4:39	AMAR375.9.20160403T043915Z.wav_chan0.xml	0	0
03/04/2016 4:53	AMAR375.9.20160403T045342Z.wav_chan0.xml	0	0
03/04/2016 5:08	AMAR375.9.20160403T050809Z.wav_chan0.xml	0	0
03/04/2016 5:22	AMAR375.9.20160403T052236Z.wav_chan0.xml	0	0
03/04/2016 5:37	AMAR375.9.20160403T053703Z.wav_chan0.xml	0	0
03/04/2016 5:51	AMAR375.9.20160403T055130Z.wav_chan0.xml	0	0
03/04/2016 6:05	AMAR375.9.20160403T060557Z.wav_chan0.xml	0	0
03/04/2016 6:20	AMAR375.9.20160403T062024Z.wav_chan0.xml	0	0
03/04/2016 6:34	AMAR375.9.20160403T063451Z.wav_chan0.xml	0	0
03/04/2016 6:49	AMAR375.9.20160403T064918Z.wav_chan0.xml	0	0
03/04/2016 7:03	AMAR375.9.20160403T070345Z.wav_chan0.xml	0	0
03/04/2016 7:18	AMAR375.9.20160403T071812Z.wav_chan0.xml	0	0
03/04/2016 7:32	AMAR375.9.20160403T073239Z.wav_chan0.xml	0	0
03/04/2016 7:47	AMAR375.9.20160403T074706Z.wav_chan0.xml	0	0
03/04/2016 8:01	AMAR375.9.20160403T080133Z.wav_chan0.xml	0	0
03/04/2016 8:16	AMAR375.9.20160403T081600Z.wav_chan0.xml	0	0
03/04/2016 8:30	AMAR375.9.20160403T083027Z.wav_chan0.xml	0	0
03/04/2016 8:44	AMAR375.9.20160403T084454Z.wav_chan0.xml	0	0
03/04/2016 8:59	AMAR375.9.20160403T085921Z.wav_chan0.xml	0	0
03/04/2016 9:13	AMAR375.9.20160403T091348Z.wav_chan0.xml	0	0
03/04/2016 9:28	AMAR375.9.20160403T092815Z.wav_chan0.xml	0	0
03/04/2016 9:42	AMAR375.9.20160403T094242Z.wav_chan0.xml	0	0
03/04/2016 9:57	AMAR375.9.20160403T095709Z.wav_chan0.xml	0	0
03/04/2016 10:11	AMAR375.9.20160403T101136Z.wav_chan0.xml	0	0
03/04/2016 10:26	AMAR375.9.20160403T102603Z.wav_chan0.xml	0	0
03/04/2016 10:40	AMAR375.9.20160403T104030Z.wav_chan0.xml	0	0
03/04/2016 10:54	AMAR375.9.20160403T105457Z.wav_chan0.xml	0	0
03/04/2016 11:09	AMAR375.9.20160403T110924Z.wav_chan0.xml	0	0
03/04/2016 11:23	AMAR375.9.20160403T112351Z.wav_chan0.xml	0	0
03/04/2016 11:38	AMAR375.9.20160403T113818Z.wav_chan0.xml	0	0
03/04/2016 11:52	AMAR375.9.20160403T115245Z.wav_chan0.xml	0	0
03/04/2016 12:07	AMAR375.9.20160403T120712Z.wav_chan0.xml	0	0
03/04/2016 12:21	AMAR375.9.20160403T122139Z.wav_chan0.xml	0	0
03/04/2016 12:36	AMAR375.9.20160403T123606Z.wav_chan0.xml	0	0
03/04/2016 12:50	AMAR375.9.20160403T125033Z.wav_chan0.xml	0	0
03/04/2016 13:05	AMAR375.9.20160403T130500Z.wav_chan0.xml	0	0
03/04/2016 13:19	AMAR375.9.20160403T131927Z.wav_chan0.xml	0	0
03/04/2016 13:33	AMAR375.9.20160403T133354Z.wav_chan0.xml	0	0
03/04/2016 13:48	AMAR375.9.20160403T134821Z.wav_chan0.xml	0	0
03/04/2016 14:02	AMAR375.9.20160403T140248Z.wav_chan0.xml	0	0
03/04/2016 14:17	AMAR375.9.20160403T141715Z.wav_chan0.xml	0	0
03/04/2016 14:31	AMAR375.9.20160403T143142Z.wav_chan0.xml	0	0
03/04/2016 14:46	AMAR375.9.20160403T144609Z.wav_chan0.xml	0	0
03/04/2016 15:00	AMAR375.9.20160403T150036Z.wav_chan0.xml	0	0
03/04/2016 15:15	AMAR375.9.20160403T151503Z.wav_chan0.xml	0	0
03/04/2016 15:29	AMAR375.9.20160403T152930Z.wav_chan0.xml	0	0
03/04/2016 15:43	AMAR375.9.20160403T154357Z.wav_chan0.xml	0	0
03/04/2016 15:58	AMAR375.9.20160403T155824Z.wav_chan0.xml	0	0
03/04/2016 16:12	AMAR375.9.20160403T161251Z.wav_chan0.xml	0	0
03/04/2016 16:27	AMAR375.9.20160403T162718Z.wav_chan0.xml	0	0
03/04/2016 16:41	AMAR375.9.20160403T164145Z.wav_chan0.xml	0	0
03/04/2016 16:56	AMAR375.9.20160403T165612Z.wav_chan0.xml	0	0
03/04/2016 17:10	AMAR375.9.20160403T171039Z.wav_chan0.xml	0	0
03/04/2016 17:25	AMAR375.9.20160403T172506Z.wav_chan0.xml	0	0
03/04/2016 17:39	AMAR375.9.20160403T173933Z.wav_chan0.xml	0	0
03/04/2016 17:54	AMAR375.9.20160403T175400Z.wav_chan0.xml	0	0
03/04/2016 18:08	AMAR375.9.20160403T180827Z.wav_chan0.xml	0	0
03/04/2016 18:22	AMAR375.9.20160403T182254Z.wav_chan0.xml	0	0
03/04/2016 18:37	AMAR375.9.20160403T183721Z.wav_chan0.xml	0	0
03/04/2016 18:51	AMAR375.9.20160403T185148Z.wav_chan0.xml	0	0
03/04/2016 19:06	AMAR375.9.20160403T190615Z.wav_chan0.xml	0	0
03/04/2016 19:20	AMAR375.9.20160403T192042Z.wav_chan0.xml	17	0
03/04/2016 19:35	AMAR375.9.20160403T193509Z.wav_chan0.xml	9	1
03/04/2016 19:49	AMAR375.9.20160403T194936Z.wav_chan0.xml	0	0
03/04/2016 20:04	AMAR375.9.20160403T200403Z.wav_chan0.xml	0	0
03/04/2016 20:18	AMAR375.9.20160403T201830Z.wav_chan0.xml	0	0
03/04/2016 20:32	AMAR375.9.20160403T203257Z.wav_chan0.xml	0	0
03/04/2016 20:47	AMAR375.9.20160403T204724Z.wav_chan0.xml	0	0
03/04/2016 21:01	AMAR375.9.20160403T210151Z.wav_chan0.xml	0	0
03/04/2016 21:16	AMAR375.9.20160403T211618Z.wav_chan0.xml	0	0
03/04/2016 21:30	AMAR375.9.20160403T213045Z.wav_chan0.xml	0	0
03/04/2016 21:45	AMAR375.9.20160403T214512Z.wav_chan0.xml	0	0
03/04/2016 21:59	AMAR375.9.20160403T215939Z.wav_chan0.xml	0	0
03/04/2016 22:14	AMAR375.9.20160403T221406Z.wav_chan0.xml	0	0
03/04/2016 22:28	AMAR375.9.20160403T222833Z.wav_chan0.xml	0	0
03/04/2016 22:43	AMAR375.9.20160403T224300Z.wav_chan0.xml	0	0
03/04/2016 22:57	AMAR375.9.20160403T225727Z.wav_chan0.xml	0	0
03/04/2016 23:11	AMAR375.9.20160403T231154Z.wav_chan0.xml	0	0
03/04/2016 23:26	AMAR375.9.20160403T232621Z.wav_chan0.xml	0	0
03/04/2016 23:40	AMAR375.9.20160403T234048Z.wav_chan0.xml	0	0
03/04/2016 23:55	AMAR375.9.20160403T235515Z.wav_chan0.xml	0	0
04/04/2016 0:09	AMAR375.9.20160404T000942Z.wav_chan0.xml	0	0
04/04/2016 0:24	AMAR375.9.20160404T002409Z.wav_chan0.xml	0	0
04/04/2016 0:38	AMAR375.9.20160404T003836Z.wav_chan0.xml	0	0
04/04/2016 0:53	AMAR375.9.20160404T005303Z.wav_chan0.xml	0	0
04/04/2016 1:07	AMAR375.9.20160404T010730Z.wav_chan0.xml	0	0
04/04/2016 1:21	AMAR375.9.20160404T012157Z.wav_chan0.xml	0	0
04/04/2016 1:50	AMAR375.9.20160404T015051Z.wav_chan0.xml	0	0
04/04/2016 2:05	AMAR375.9.20160404T020518Z.wav_chan0.xml	0	0
04/04/2016 2:19	AMAR375.9.20160404T021945Z.wav_chan0.xml	0	0
04/04/2016 2:34	AMAR375.9.20160404T023412Z.wav_chan0.xml	0	0
04/04/2016 2:48	AMAR375.9.20160404T024839Z.wav_chan0.xml	0	0
04/04/2016 3:03	AMAR375.9.20160404T030306Z.wav_chan0.xml	0	0
04/04/2016 3:17	AMAR375.9.20160404T031733Z.wav_chan0.xml	0	0
04/04/2016 3:32	AMAR375.9.20160404T033200Z.wav_chan0.xml	0	0
04/04/2016 3:46	AMAR375.9.20160404T034627Z.wav_chan0.xml	0	0
04/04/2016 4:00	AMAR375.9.20160404T040054Z.wav_chan0.xml	0	0
04/04/2016 4:15	AMAR375.9.20160404T041521Z.wav_chan0.xml	0	0
04/04/2016 4:29	AMAR375.9.20160404T042948Z.wav_chan0.xml	0	0
04/04/2016 4:44	AMAR375.9.20160404T044415Z.wav_chan0.xml	0	0
04/04/2016 4:58	AMAR375.9.20160404T045842Z.wav_chan0.xml	0	0
04/04/2016 5:13	AMAR375.9.20160404T051309Z.wav_chan0.xml	0	0
04/04/2016 5:27	AMAR375.9.20160404T052736Z.wav_chan0.xml	0	0
04/04/2016 5:42	AMAR375.9.20160404T054203Z.wav_chan0.xml	0	0
04/04/2016 5:56	AMAR375.9.20160404T055630Z.wav_chan0.xml	0	0
04/04/2016 6:10	AMAR375.9.20160404T061057Z.wav_chan0.xml	0	0
04/04/2016 6:25	AMAR375.9.20160404T062524Z.wav_chan0.xml	0	0
04/04/2016 6:39	AMAR375.9.20160404T063951Z.wav_chan0.xml	0	0
04/04/2016 6:54	AMAR375.9.20160404T065418Z.wav_chan0.xml	0	0
04/04/2016 7:08	AMAR375.9.20160404T070845Z.wav_chan0.xml	0	0
04/04/2016 7:23	AMAR375.9.20160404T072312Z.wav_chan0.xml	0	0
04/04/2016 7:37	AMAR375.9.20160404T073739Z.wav_chan0.xml	0	0
04/04/2016 7:52	AMAR375.9.20160404T075206Z.wav_chan0.xml	0	0
04/04/2016 8:06	AMAR375.9.20160404T080633Z.wav_chan0.xml	0	0
04/04/2016 8:21	AMAR375.9.20160404T082100Z.wav_chan0.xml	0	0
04/04/2016 8:35	AMAR375.9.20160404T083527Z.wav_chan0.xml	0	0
04/04/2016 8:49	AMAR375.9.20160404T084954Z.wav_chan0.xml	0	0
04/04/2016 9:04	AMAR375.9.20160404T090421Z.wav_chan0.xml	0	0
04/04/2016 9:18	AMAR375.9.20160404T091848Z.wav_chan0.xml	0	0
04/04/2016 9:33	AMAR375.9.20160404T093315Z.wav_chan0.xml	0	0
04/04/2016 9:47	AMAR375.9.20160404T094742Z.wav_chan0.xml	0	0
04/04/2016 10:02	AMAR375.9.20160404T100209Z.wav_chan0.xml	0	0
04/04/2016 10:16	AMAR375.9.20160404T101636Z.wav_chan0.xml	0	0
04/04/2016 10:31	AMAR375.9.20160404T103103Z.wav_chan0.xml	0	0
04/04/2016 10:45	AMAR375.9.20160404T104530Z.wav_chan0.xml	0	0
04/04/2016 10:59	AMAR375.9.20160404T105957Z.wav_chan0.xml	0	0
04/04/2016 11:14	AMAR375.9.20160404T111424Z.wav_chan0.xml	0	0
04/04/2016 11:28	AMAR375.9.20160404T112851Z.wav_chan0.xml	0	0
04/04/2016 11:43	AMAR375.9.20160404T114318Z.wav_chan0.xml	0	0
04/04/2016 11:57	AMAR375.9.20160404T115745Z.wav_chan0.xml	0	0
04/04/2016 12:12	AMAR375.9.20160404T121212Z.wav_chan0.xml	0	0
04/04/2016 12:26	AMAR375.9.20160404T122639Z.wav_chan0.xml	0	0
04/04/2016 12:41	AMAR375.9.20160404T124106Z.wav_chan0.xml	0	0
04/04/2016 12:55	AMAR375.9.20160404T125533Z.wav_chan0.xml	0	0
04/04/2016 13:10	AMAR375.9.20160404T131000Z.wav_chan0.xml	0	0
04/04/2016 13:24	AMAR375.9.20160404T132427Z.wav_chan0.xml	0	0
04/04/2016 13:38	AMAR375.9.20160404T133854Z.wav_chan0.xml	0	0
04/04/2016 13:53	AMAR375.9.20160404T135321Z.wav_chan0.xml	0	0
04/04/2016 14:07	AMAR375.9.20160404T140748Z.wav_chan0.xml	0	0
04/04/2016 14:22	AMAR375.9.20160404T142215Z.wav_chan0.xml	0	0
04/04/2016 14:36	AMAR375.9.20160404T143642Z.wav_chan0.xml	0	0
04/04/2016 14:51	AMAR375.9.20160404T145109Z.wav_chan0.xml	0	0
04/04/2016 15:05	AMAR375.9.20160404T150536Z.wav_chan0.xml	0	0
04/04/2016 15:20	AMAR375.9.20160404T152003Z.wav_chan0.xml	0	0
04/04/2016 15:34	AMAR375.9.20160404T153430Z.wav_chan0.xml	0	0
04/04/2016 15:48	AMAR375.9.20160404T154857Z.wav_chan0.xml	0	0
04/04/2016 16:03	AMAR375.9.20160404T160324Z.wav_chan0.xml	0	0
04/04/2016 16:17	AMAR375.9.20160404T161751Z.wav_chan0.xml	0	0
04/04/2016 16:32	AMAR375.9.20160404T163218Z.wav_chan0.xml	0	0
04/04/2016 16:46	AMAR375.9.20160404T164645Z.wav_chan0.xml	0	0
04/04/2016 17:01	AMAR375.9.20160404T170112Z.wav_chan0.xml	0	0
04/04/2016 17:15	AMAR375.9.20160404T171539Z.wav_chan0.xml	0	0
04/04/2016 17:30	AMAR375.9.20160404T173006Z.wav_chan0.xml	0	0
04/04/2016 17:44	AMAR375.9.20160404T174433Z.wav_chan0.xml	0	0
04/04/2016 17:59	AMAR375.9.20160404T175900Z.wav_chan0.xml	0	0
04/04/2016 18:13	AMAR375.9.20160404T181327Z.wav_chan0.xml	0	0
04/04/2016 18:27	AMAR375.9.20160404T182754Z.wav_chan0.xml	0	0
04/04/2016 18:42	AMAR375.9.20160404T184221Z.wav_chan0.xml	0	0
04/04/2016 18:56	AMAR375.9.20160404T185648Z.wav_chan0.xml	0	0
04/04/2016 19:11	AMAR375.9.20160404T191115Z.wav_chan0.xml	0	0
04/04/2016 19:25	AMAR375.9.20160404T192542Z.wav_chan0.xml	0	0
04/04/2016 19:40	AMAR375.9.20160404T194009Z.wav_chan0.xml	0	0
04/04/2016 19:54	AMAR375.9.20160404T195436Z.wav_chan0.xml	0	0
04/04/2016 20:09	AMAR375.9.20160404T200903Z.wav_chan0.xml	0	0
04/04/2016 20:23	AMAR375.9.20160404T202330Z.wav_chan0.xml	0	0
04/04/2016 20:37	AMAR375.9.20160404T203757Z.wav_chan0.xml	0	0
04/04/2016 20:52	AMAR375.9.20160404T205224Z.wav_chan0.xml	0	0
04/04/2016 21:06	AMAR375.9.20160404T210651Z.wav_chan0.xml	0	0
04/04/2016 21:21	AMAR375.9.20160404T212118Z.wav_chan0.xml	0	0
04/04/2016 21:35	AMAR375.9.20160404T213545Z.wav_chan0.xml	0	0
04/04/2016 21:50	AMAR375.9.20160404T215012Z.wav_chan0.xml	0	0
04/04/2016 22:04	AMAR375.9.20160404T220439Z.wav_chan0.xml	0	0
04/04/2016 22:19	AMAR375.9.20160404T221906Z.wav_chan0.xml	0	0
04/04/2016 22:33	AMAR375.9.20160404T223333Z.wav_chan0.xml	0	0
04/04/2016 22:48	AMAR375.9.20160404T224800Z.wav_chan0.xml	0	0
04/04/2016 23:02	AMAR375.9.20160404T230227Z.wav_chan0.xml	0	0
04/04/2016 23:16	AMAR375.9.20160404T231654Z.wav_chan0.xml	0	0
04/04/2016 23:31	AMAR375.9.20160404T233121Z.wav_chan0.xml	0	0
04/04/2016 23:45	AMAR375.9.20160404T234548Z.wav_chan0.xml	0	0
05/04/2016 0:00	AMAR375.9.20160405T000015Z.wav_chan0.xml	0	0
05/04/2016 0:14	AMAR375.9.20160405T001442Z.wav_chan0.xml	0	0
05/04/2016 0:29	AMAR375.9.20160405T002909Z.wav_chan0.xml	0	0
05/04/2016 0:43	AMAR375.9.20160405T004336Z.wav_chan0.xml	0	0
05/04/2016 0:58	AMAR375.9.20160405T005803Z.wav_chan0.xml	0	0
05/04/2016 1:12	AMAR375.9.20160405T011230Z.wav_chan0.xml	0	0
05/04/2016 1:26	AMAR375.9.20160405T012657Z.wav_chan0.xml	4	0
05/04/2016 1:41	AMAR375.9.20160405T014124Z.wav_chan0.xml	0	0
05/04/2016 1:55	AMAR375.9.20160405T015551Z.wav_chan0.xml	14	0
05/04/2016 2:10	AMAR375.9.20160405T021018Z.wav_chan0.xml	0	0
05/04/2016 2:24	AMAR375.9.20160405T022445Z.wav_chan0.xml	0	0
05/04/2016 2:39	AMAR375.9.20160405T023912Z.wav_chan0.xml	0	0
05/04/2016 2:53	AMAR375.9.20160405T025339Z.wav_chan0.xml	0	0
05/04/2016 3:08	AMAR375.9.20160405T030806Z.wav_chan0.xml	0	0
05/04/2016 3:22	AMAR375.9.20160405T032233Z.wav_chan0.xml	0	0
05/04/2016 3:37	AMAR375.9.20160405T033700Z.wav_chan0.xml	0	0
05/04/2016 3:51	AMAR375.9.20160405T035127Z.wav_chan0.xml	0	0
05/04/2016 4:05	AMAR375.9.20160405T040554Z.wav_chan0.xml	0	0
05/04/2016 4:20	AMAR375.9.20160405T042021Z.wav_chan0.xml	0	0
05/04/2016 4:34	AMAR375.9.20160405T043448Z.wav_chan0.xml	0	0
05/04/2016 4:49	AMAR375.9.20160405T044915Z.wav_chan0.xml	0	0
05/04/2016 5:03	AMAR375.9.20160405T050342Z.wav_chan0.xml	0	0
05/04/2016 5:18	AMAR375.9.20160405T051809Z.wav_chan0.xml	0	0
05/04/2016 5:32	AMAR375.9.20160405T053236Z.wav_chan0.xml	0	0
05/04/2016 5:47	AMAR375.9.20160405T054703Z.wav_chan0.xml	0	0
05/04/2016 6:01	AMAR375.9.20160405T060130Z.wav_chan0.xml	0	0
05/04/2016 6:15	AMAR375.9.20160405T061557Z.wav_chan0.xml	0	0
05/04/2016 6:30	AMAR375.9.20160405T063024Z.wav_chan0.xml	0	0
05/04/2016 6:44	AMAR375.9.20160405T064451Z.wav_chan0.xml	0	0
05/04/2016 6:59	AMAR375.9.20160405T065918Z.wav_chan0.xml	0	0
05/04/2016 7:13	AMAR375.9.20160405T071345Z.wav_chan0.xml	0	0
05/04/2016 7:28	AMAR375.9.20160405T072812Z.wav_chan0.xml	0	0
05/04/2016 7:42	AMAR375.9.20160405T074239Z.wav_chan0.xml	0	0
05/04/2016 7:57	AMAR375.9.20160405T075706Z.wav_chan0.xml	0	0
05/04/2016 8:11	AMAR375.9.20160405T081133Z.wav_chan0.xml	0	0
05/04/2016 8:26	AMAR375.9.20160405T082600Z.wav_chan0.xml	0	0
05/04/2016 8:40	AMAR375.9.20160405T084027Z.wav_chan0.xml	0	0
05/04/2016 8:54	AMAR375.9.20160405T085454Z.wav_chan0.xml	0	0
05/04/2016 9:09	AMAR375.9.20160405T090921Z.wav_chan0.xml	0	0
05/04/2016 9:23	AMAR375.9.20160405T092348Z.wav_chan0.xml	0	0
05/04/2016 9:38	AMAR375.9.20160405T093815Z.wav_chan0.xml	0	0
05/04/2016 9:52	AMAR375.9.20160405T095242Z.wav_chan0.xml	0	0
05/04/2016 10:07	AMAR375.9.20160405T100709Z.wav_chan0.xml	0	0
05/04/2016 10:21	AMAR375.9.20160405T102136Z.wav_chan0.xml	0	0
05/04/2016 10:36	AMAR375.9.20160405T103603Z.wav_chan0.xml	0	0
05/04/2016 10:50	AMAR375.9.20160405T105030Z.wav_chan0.xml	0	0
05/04/2016 11:04	AMAR375.9.20160405T110457Z.wav_chan0.xml	0	0
05/04/2016 11:19	AMAR375.9.20160405T111924Z.wav_chan0.xml	0	0
05/04/2016 11:33	AMAR375.9.20160405T113351Z.wav_chan0.xml	0	0
05/04/2016 11:48	AMAR375.9.20160405T114818Z.wav_chan0.xml	0	0
05/04/2016 12:02	AMAR375.9.20160405T120245Z.wav_chan0.xml	0	0
05/04/2016 12:17	AMAR375.9.20160405T121712Z.wav_chan0.xml	0	0
05/04/2016 12:31	AMAR375.9.20160405T123139Z.wav_chan0.xml	0	0
05/04/2016 12:46	AMAR375.9.20160405T124606Z.wav_chan0.xml	0	0
05/04/2016 13:00	AMAR375.9.20160405T130033Z.wav_chan0.xml	0	0
05/04/2016 13:15	AMAR375.9.20160405T131500Z.wav_chan0.xml	0	0
05/04/2016 13:29	AMAR375.9.20160405T132927Z.wav_chan0.xml	0	0
05/04/2016 13:43	AMAR375.9.20160405T134354Z.wav_chan0.xml	0	0
05/04/2016 13:58	AMAR375.9.20160405T135821Z.wav_chan0.xml	0	0
05/04/2016 14:12	AMAR375.9.20160405T141248Z.wav_chan0.xml	0	0
05/04/2016 14:27	AMAR375.9.20160405T142715Z.wav_chan0.xml	25	0
05/04/2016 14:41	AMAR375.9.20160405T144142Z.wav_chan0.xml	0	0
05/04/2016 14:56	AMAR375.9.20160405T145609Z.wav_chan0.xml	0	0
05/04/2016 15:10	AMAR375.9.20160405T151036Z.wav_chan0.xml	0	0
05/04/2016 15:25	AMAR375.9.20160405T152503Z.wav_chan0.xml	0	0
05/04/2016 15:39	AMAR375.9.20160405T153930Z.wav_chan0.xml	0	0
05/04/2016 15:53	AMAR375.9.20160405T155357Z.wav_chan0.xml	0	0
05/04/2016 16:08	AMAR375.9.20160405T160824Z.wav_chan0.xml	0	0
05/04/2016 16:22	AMAR375.9.20160405T162251Z.wav_chan0.xml	0	0
05/04/2016 16:37	AMAR375.9.20160405T163718Z.wav_chan0.xml	0	0
05/04/2016 16:51	AMAR375.9.20160405T165145Z.wav_chan0.xml	0	0
05/04/2016 17:06	AMAR375.9.20160405T170612Z.wav_chan0.xml	0	0
05/04/2016 17:20	AMAR375.9.20160405T172039Z.wav_chan0.xml	0	0
05/04/2016 17:35	AMAR375.9.20160405T173506Z.wav_chan0.xml	0	0
05/04/2016 17:49	AMAR375.9.20160405T174933Z.wav_chan0.xml	0	0
05/04/2016 18:04	AMAR375.9.20160405T180400Z.wav_chan0.xml	0	0
05/04/2016 18:18	AMAR375.9.20160405T181827Z.wav_chan0.xml	0	0
05/04/2016 18:32	AMAR375.9.20160405T183254Z.wav_chan0.xml	0	0
05/04/2016 18:47	AMAR375.9.20160405T184721Z.wav_chan0.xml	0	0
05/04/2016 19:01	AMAR375.9.20160405T190148Z.wav_chan0.xml	0	0
05/04/2016 19:16	AMAR375.9.20160405T191615Z.wav_chan0.xml	0	0
05/04/2016 19:30	AMAR375.9.20160405T193042Z.wav_chan0.xml	0	0
05/04/2016 19:45	AMAR375.9.20160405T194509Z.wav_chan0.xml	0	0
05/04/2016 19:59	AMAR375.9.20160405T195936Z.wav_chan0.xml	0	0
05/04/2016 20:14	AMAR375.9.20160405T201403Z.wav_chan0.xml	0	0
05/04/2016 20:28	AMAR375.9.20160405T202830Z.wav_chan0.xml	0	0
05/04/2016 20:42	AMAR375.9.20160405T204257Z.wav_chan0.xml	0	0
05/04/2016 20:57	AMAR375.9.20160405T205724Z.wav_chan0.xml	0	0
05/04/2016 21:11	AMAR375.9.20160405T211151Z.wav_chan0.xml	0	0
05/04/2016 21:26	AMAR375.9.20160405T212618Z.wav_chan0.xml	0	0
05/04/2016 21:40	AMAR375.9.20160405T214045Z.wav_chan0.xml	0	0
05/04/2016 21:55	AMAR375.9.20160405T215512Z.wav_chan0.xml	0	0
05/04/2016 22:09	AMAR375.9.20160405T220939Z.wav_chan0.xml	3	0
05/04/2016 22:24	AMAR375.9.20160405T222406Z.wav_chan0.xml	0	0
05/04/2016 22:38	AMAR375.9.20160405T223833Z.wav_chan0.xml	0	0
05/04/2016 22:53	AMAR375.9.20160405T225300Z.wav_chan0.xml	0	0
05/04/2016 23:07	AMAR375.9.20160405T230727Z.wav_chan0.xml	0	0
05/04/2016 23:21	AMAR375.9.20160405T232154Z.wav_chan0.xml	0	0
05/04/2016 23:36	AMAR375.9.20160405T233621Z.wav_chan0.xml	0	0
05/04/2016 23:50	AMAR375.9.20160405T235048Z.wav_chan0.xml	0	0
06/04/2016 0:05	AMAR375.9.20160406T000515Z.wav_chan0.xml	0	0
06/04/2016 0:19	AMAR375.9.20160406T001942Z.wav_chan0.xml	0	0
06/04/2016 0:34	AMAR375.9.20160406T003409Z.wav_chan0.xml	0	0
06/04/2016 0:48	AMAR375.9.20160406T004836Z.wav_chan0.xml	0	0
06/04/2016 1:03	AMAR375.9.20160406T010303Z.wav_chan0.xml	0	0
06/04/2016 1:17	AMAR375.9.20160406T011730Z.wav_chan0.xml	0	0
06/04/2016 1:31	AMAR375.9.20160406T013157Z.wav_chan0.xml	0	0
06/04/2016 1:46	AMAR375.9.20160406T014624Z.wav_chan0.xml	0	0
06/04/2016 2:00	AMAR375.9.20160406T020051Z.wav_chan0.xml	0	0
06/04/2016 2:15	AMAR375.9.20160406T021518Z.wav_chan0.xml	0	0
06/04/2016 2:29	AMAR375.9.20160406T022945Z.wav_chan0.xml	0	0
06/04/2016 2:44	AMAR375.9.20160406T024412Z.wav_chan0.xml	0	0
06/04/2016 2:58	AMAR375.9.20160406T025839Z.wav_chan0.xml	0	0
06/04/2016 3:13	AMAR375.9.20160406T031306Z.wav_chan0.xml	0	0
06/04/2016 3:27	AMAR375.9.20160406T032733Z.wav_chan0.xml	0	0
06/04/2016 3:42	AMAR375.9.20160406T034200Z.wav_chan0.xml	0	0
06/04/2016 3:56	AMAR375.9.20160406T035627Z.wav_chan0.xml	0	0
06/04/2016 4:10	AMAR375.9.20160406T041054Z.wav_chan0.xml	0	0
06/04/2016 4:25	AMAR375.9.20160406T042521Z.wav_chan0.xml	0	0
06/04/2016 4:39	AMAR375.9.20160406T043948Z.wav_chan0.xml	0	0
06/04/2016 4:54	AMAR375.9.20160406T045415Z.wav_chan0.xml	0	0
06/04/2016 5:08	AMAR375.9.20160406T050842Z.wav_chan0.xml	0	0
06/04/2016 5:23	AMAR375.9.20160406T052309Z.wav_chan0.xml	0	0
06/04/2016 5:37	AMAR375.9.20160406T053736Z.wav_chan0.xml	0	0
06/04/2016 5:52	AMAR375.9.20160406T055203Z.wav_chan0.xml	0	0
06/04/2016 6:06	AMAR375.9.20160406T060630Z.wav_chan0.xml	0	0
06/04/2016 6:20	AMAR375.9.20160406T062057Z.wav_chan0.xml	6	0
06/04/2016 6:35	AMAR375.9.20160406T063524Z.wav_chan0.xml	6	0
06/04/2016 6:49	AMAR375.9.20160406T064951Z.wav_chan0.xml	0	0
06/04/2016 7:04	AMAR375.9.20160406T070418Z.wav_chan0.xml	0	0
06/04/2016 7:18	AMAR375.9.20160406T071845Z.wav_chan0.xml	0	0
06/04/2016 7:33	AMAR375.9.20160406T073312Z.wav_chan0.xml	0	0
06/04/2016 7:47	AMAR375.9.20160406T074739Z.wav_chan0.xml	0	0
06/04/2016 8:02	AMAR375.9.20160406T080206Z.wav_chan0.xml	0	0
06/04/2016 8:16	AMAR375.9.20160406T081633Z.wav_chan0.xml	0	0
06/04/2016 8:31	AMAR375.9.20160406T083100Z.wav_chan0.xml	0	0
06/04/2016 8:45	AMAR375.9.20160406T084527Z.wav_chan0.xml	0	0
06/04/2016 8:59	AMAR375.9.20160406T085954Z.wav_chan0.xml	0	0
06/04/2016 9:14	AMAR375.9.20160406T091421Z.wav_chan0.xml	0	0
06/04/2016 9:28	AMAR375.9.20160406T092848Z.wav_chan0.xml	0	0
06/04/2016 9:43	AMAR375.9.20160406T094315Z.wav_chan0.xml	0	0
06/04/2016 9:57	AMAR375.9.20160406T095742Z.wav_chan0.xml	0	0
06/04/2016 10:12	AMAR375.9.20160406T101209Z.wav_chan0.xml	0	0
06/04/2016 10:26	AMAR375.9.20160406T102636Z.wav_chan0.xml	0	0
06/04/2016 10:41	AMAR375.9.20160406T104103Z.wav_chan0.xml	0	0
06/04/2016 10:55	AMAR375.9.20160406T105530Z.wav_chan0.xml	0	0
06/04/2016 11:09	AMAR375.9.20160406T110957Z.wav_chan0.xml	0	0
06/04/2016 11:24	AMAR375.9.20160406T112424Z.wav_chan0.xml	0	0
06/04/2016 11:38	AMAR375.9.20160406T113851Z.wav_chan0.xml	0	0
06/04/2016 11:53	AMAR375.9.20160406T115318Z.wav_chan0.xml	0	0
06/04/2016 12:07	AMAR375.9.20160406T120745Z.wav_chan0.xml	0	0
06/04/2016 12:22	AMAR375.9.20160406T122212Z.wav_chan0.xml	0	0
06/04/2016 12:36	AMAR375.9.20160406T123639Z.wav_chan0.xml	0	0
06/04/2016 12:51	AMAR375.9.20160406T125106Z.wav_chan0.xml	0	0
06/04/2016 13:05	AMAR375.9.20160406T130533Z.wav_chan0.xml	0	0
06/04/2016 13:20	AMAR375.9.20160406T132000Z.wav_chan0.xml	0	0
06/04/2016 13:34	AMAR375.9.20160406T133427Z.wav_chan0.xml	0	0
06/04/2016 13:48	AMAR375.9.20160406T134854Z.wav_chan0.xml	0	0
06/04/2016 14:03	AMAR375.9.20160406T140321Z.wav_chan0.xml	0	0
06/04/2016 14:17	AMAR375.9.20160406T141748Z.wav_chan0.xml	0	0
06/04/2016 14:32	AMAR375.9.20160406T143215Z.wav_chan0.xml	0	0
06/04/2016 14:46	AMAR375.9.20160406T144642Z.wav_chan0.xml	0	0
06/04/2016 15:01	AMAR375.9.20160406T150109Z.wav_chan0.xml	0	0
06/04/2016 15:15	AMAR375.9.20160406T151536Z.wav_chan0.xml	0	0
06/04/2016 15:30	AMAR375.9.20160406T153003Z.wav_chan0.xml	0	0
06/04/2016 15:44	AMAR375.9.20160406T154430Z.wav_chan0.xml	0	0
06/04/2016 15:58	AMAR375.9.20160406T155857Z.wav_chan0.xml	0	0
06/04/2016 16:13	AMAR375.9.20160406T161324Z.wav_chan0.xml	0	0
06/04/2016 16:27	AMAR375.9.20160406T162751Z.wav_chan0.xml	0	0
06/04/2016 16:42	AMAR375.9.20160406T164218Z.wav_chan0.xml	0	0
06/04/2016 16:56	AMAR375.9.20160406T165645Z.wav_chan0.xml	0	0
06/04/2016 17:11	AMAR375.9.20160406T171112Z.wav_chan0.xml	0	0
06/04/2016 17:25	AMAR375.9.20160406T172539Z.wav_chan0.xml	0	0
06/04/2016 17:40	AMAR375.9.20160406T174006Z.wav_chan0.xml	2	0
06/04/2016 17:54	AMAR375.9.20160406T175433Z.wav_chan0.xml	0	0
06/04/2016 18:09	AMAR375.9.20160406T180900Z.wav_chan0.xml	0	0
06/04/2016 18:23	AMAR375.9.20160406T182327Z.wav_chan0.xml	0	0
06/04/2016 18:37	AMAR375.9.20160406T183754Z.wav_chan0.xml	0	0
06/04/2016 18:52	AMAR375.9.20160406T185221Z.wav_chan0.xml	0	0
06/04/2016 19:06	AMAR375.9.20160406T190648Z.wav_chan0.xml	0	0
06/04/2016 19:21	AMAR375.9.20160406T192115Z.wav_chan0.xml	0	0
06/04/2016 19:35	AMAR375.9.20160406T193542Z.wav_chan0.xml	0	0
06/04/2016 19:50	AMAR375.9.20160406T195009Z.wav_chan0.xml	0	0
06/04/2016 20:04	AMAR375.9.20160406T200436Z.wav_chan0.xml	0	0
06/04/2016 20:19	AMAR375.9.20160406T201903Z.wav_chan0.xml	0	0
06/04/2016 20:33	AMAR375.9.20160406T203330Z.wav_chan0.xml	0	0
06/04/2016 20:47	AMAR375.9.20160406T204757Z.wav_chan0.xml	0	0
06/04/2016 21:02	AMAR375.9.20160406T210224Z.wav_chan0.xml	0	0
06/04/2016 21:16	AMAR375.9.20160406T211651Z.wav_chan0.xml	0	0
06/04/2016 21:31	AMAR375.9.20160406T213118Z.wav_chan0.xml	0	0
06/04/2016 21:45	AMAR375.9.20160406T214545Z.wav_chan0.xml	0	0
06/04/2016 22:00	AMAR375.9.20160406T220012Z.wav_chan0.xml	0	0
06/04/2016 22:14	AMAR375.9.20160406T221439Z.wav_chan0.xml	0	0
06/04/2016 22:29	AMAR375.9.20160406T222906Z.wav_chan0.xml	0	0
06/04/2016 22:43	AMAR375.9.20160406T224333Z.wav_chan0.xml	0	0
06/04/2016 22:58	AMAR375.9.20160406T225800Z.wav_chan0.xml	0	0
06/04/2016 23:12	AMAR375.9.20160406T231227Z.wav_chan0.xml	0	0
06/04/2016 23:26	AMAR375.9.20160406T232654Z.wav_chan0.xml	0	0
06/04/2016 23:41	AMAR375.9.20160406T234121Z.wav_chan0.xml	0	0
06/04/2016 23:55	AMAR375.9.20160406T235548Z.wav_chan0.xml	0	0
07/04/2016 0:10	AMAR375.9.20160407T001015Z.wav_chan0.xml	0	0
07/04/2016 0:24	AMAR375.9.20160407T002442Z.wav_chan0.xml	0	0
07/04/2016 0:39	AMAR375.9.20160407T003909Z.wav_chan0.xml	0	0
07/04/2016 0:53	AMAR375.9.20160407T005336Z.wav_chan0.xml	0	0
07/04/2016 1:08	AMAR375.9.20160407T010803Z.wav_chan0.xml	0	0
07/04/2016 1:22	AMAR375.9.20160407T012230Z.wav_chan0.xml	0	0
07/04/2016 1:36	AMAR375.9.20160407T013657Z.wav_chan0.xml	0	0
07/04/2016 1:51	AMAR375.9.20160407T015124Z.wav_chan0.xml	0	0
07/04/2016 2:05	AMAR375.9.20160407T020551Z.wav_chan0.xml	0	0
07/04/2016 2:20	AMAR375.9.20160407T022018Z.wav_chan0.xml	0	0
07/04/2016 2:34	AMAR375.9.20160407T023445Z.wav_chan0.xml	1	0
07/04/2016 2:49	AMAR375.9.20160407T024912Z.wav_chan0.xml	0	0
07/04/2016 3:03	AMAR375.9.20160407T030339Z.wav_chan0.xml	0	0
07/04/2016 3:18	AMAR375.9.20160407T031806Z.wav_chan0.xml	0	0
07/04/2016 3:32	AMAR375.9.20160407T033233Z.wav_chan0.xml	0	0
07/04/2016 3:47	AMAR375.9.20160407T034700Z.wav_chan0.xml	0	0
07/04/2016 4:01	AMAR375.9.20160407T040127Z.wav_chan0.xml	0	0
07/04/2016 4:15	AMAR375.9.20160407T041554Z.wav_chan0.xml	0	0
07/04/2016 4:30	AMAR375.9.20160407T043021Z.wav_chan0.xml	0	0
07/04/2016 4:44	AMAR375.9.20160407T044448Z.wav_chan0.xml	0	0
07/04/2016 4:59	AMAR375.9.20160407T045915Z.wav_chan0.xml	0	0
07/04/2016 5:13	AMAR375.9.20160407T051342Z.wav_chan0.xml	0	0
07/04/2016 5:28	AMAR375.9.20160407T052809Z.wav_chan0.xml	0	0
07/04/2016 5:42	AMAR375.9.20160407T054236Z.wav_chan0.xml	0	0
07/04/2016 5:57	AMAR375.9.20160407T055703Z.wav_chan0.xml	0	0
07/04/2016 6:11	AMAR375.9.20160407T061130Z.wav_chan0.xml	0	0
07/04/2016 6:25	AMAR375.9.20160407T062557Z.wav_chan0.xml	0	0
07/04/2016 6:40	AMAR375.9.20160407T064024Z.wav_chan0.xml	0	0
07/04/2016 6:54	AMAR375.9.20160407T065451Z.wav_chan0.xml	0	0
07/04/2016 7:09	AMAR375.9.20160407T070918Z.wav_chan0.xml	0	0
07/04/2016 7:23	AMAR375.9.20160407T072345Z.wav_chan0.xml	0	0
07/04/2016 7:38	AMAR375.9.20160407T073812Z.wav_chan0.xml	0	0
07/04/2016 7:52	AMAR375.9.20160407T075239Z.wav_chan0.xml	0	0
07/04/2016 8:07	AMAR375.9.20160407T080706Z.wav_chan0.xml	0	0
07/04/2016 8:21	AMAR375.9.20160407T082133Z.wav_chan0.xml	0	0
07/04/2016 8:36	AMAR375.9.20160407T083600Z.wav_chan0.xml	0	0
07/04/2016 8:50	AMAR375.9.20160407T085027Z.wav_chan0.xml	0	0
07/04/2016 9:04	AMAR375.9.20160407T090454Z.wav_chan0.xml	0	0
07/04/2016 9:19	AMAR375.9.20160407T091921Z.wav_chan0.xml	0	0
07/04/2016 9:33	AMAR375.9.20160407T093348Z.wav_chan0.xml	0	0
07/04/2016 9:48	AMAR375.9.20160407T094815Z.wav_chan0.xml	0	0
07/04/2016 10:02	AMAR375.9.20160407T100242Z.wav_chan0.xml	0	0
07/04/2016 10:17	AMAR375.9.20160407T101709Z.wav_chan0.xml	0	0
07/04/2016 10:31	AMAR375.9.20160407T103136Z.wav_chan0.xml	0	0
07/04/2016 10:46	AMAR375.9.20160407T104603Z.wav_chan0.xml	0	0
07/04/2016 11:00	AMAR375.9.20160407T110030Z.wav_chan0.xml	0	0
07/04/2016 11:14	AMAR375.9.20160407T111457Z.wav_chan0.xml	0	0
07/04/2016 11:29	AMAR375.9.20160407T112924Z.wav_chan0.xml	0	0
07/04/2016 11:43	AMAR375.9.20160407T114351Z.wav_chan0.xml	0	0
07/04/2016 11:58	AMAR375.9.20160407T115818Z.wav_chan0.xml	0	0
07/04/2016 12:12	AMAR375.9.20160407T121245Z.wav_chan0.xml	0	0
07/04/2016 12:27	AMAR375.9.20160407T122712Z.wav_chan0.xml	0	0
07/04/2016 12:41	AMAR375.9.20160407T124139Z.wav_chan0.xml	0	0
07/04/2016 12:56	AMAR375.9.20160407T125606Z.wav_chan0.xml	0	0
07/04/2016 13:10	AMAR375.9.20160407T131033Z.wav_chan0.xml	0	0
07/04/2016 13:25	AMAR375.9.20160407T132500Z.wav_chan0.xml	0	0
07/04/2016 13:39	AMAR375.9.20160407T133927Z.wav_chan0.xml	0	0
07/04/2016 13:53	AMAR375.9.20160407T135354Z.wav_chan0.xml	0	0
07/04/2016 14:08	AMAR375.9.20160407T140821Z.wav_chan0.xml	0	0
07/04/2016 14:22	AMAR375.9.20160407T142248Z.wav_chan0.xml	2	0
07/04/2016 14:37	AMAR375.9.20160407T143715Z.wav_chan0.xml	0	0
07/04/2016 14:51	AMAR375.9.20160407T145142Z.wav_chan0.xml	0	0
07/04/2016 15:06	AMAR375.9.20160407T150609Z.wav_chan0.xml	0	0
07/04/2016 15:20	AMAR375.9.20160407T152036Z.wav_chan0.xml	0	0
07/04/2016 15:35	AMAR375.9.20160407T153503Z.wav_chan0.xml	0	0
07/04/2016 15:49	AMAR375.9.20160407T154930Z.wav_chan0.xml	0	0
07/04/2016 16:03	AMAR375.9.20160407T160357Z.wav_chan0.xml	0	0
07/04/2016 16:18	AMAR375.9.20160407T161824Z.wav_chan0.xml	0	0
07/04/2016 16:32	AMAR375.9.20160407T163251Z.wav_chan0.xml	0	0
07/04/2016 16:47	AMAR375.9.20160407T164718Z.wav_chan0.xml	0	0
07/04/2016 17:01	AMAR375.9.20160407T170145Z.wav_chan0.xml	0	0
07/04/2016 17:16	AMAR375.9.20160407T171612Z.wav_chan0.xml	0	0
07/04/2016 17:30	AMAR375.9.20160407T173039Z.wav_chan0.xml	0	0
07/04/2016 17:45	AMAR375.9.20160407T174506Z.wav_chan0.xml	0	0
07/04/2016 17:59	AMAR375.9.20160407T175933Z.wav_chan0.xml	0	0
07/04/2016 18:14	AMAR375.9.20160407T181400Z.wav_chan0.xml	0	0
07/04/2016 18:28	AMAR375.9.20160407T182827Z.wav_chan0.xml	0	0
07/04/2016 18:42	AMAR375.9.20160407T184254Z.wav_chan0.xml	0	0
07/04/2016 18:57	AMAR375.9.20160407T185721Z.wav_chan0.xml	0	0
07/04/2016 19:11	AMAR375.9.20160407T191148Z.wav_chan0.xml	0	0
07/04/2016 19:26	AMAR375.9.20160407T192615Z.wav_chan0.xml	0	0
07/04/2016 19:40	AMAR375.9.20160407T194042Z.wav_chan0.xml	0	0
07/04/2016 19:55	AMAR375.9.20160407T195509Z.wav_chan0.xml	21	0
07/04/2016 20:09	AMAR375.9.20160407T200936Z.wav_chan0.xml	0	0
07/04/2016 20:24	AMAR375.9.20160407T202403Z.wav_chan0.xml	0	0
07/04/2016 20:38	AMAR375.9.20160407T203830Z.wav_chan0.xml	0	0
07/04/2016 20:52	AMAR375.9.20160407T205257Z.wav_chan0.xml	0	0
07/04/2016 21:07	AMAR375.9.20160407T210724Z.wav_chan0.xml	0	0
07/04/2016 21:21	AMAR375.9.20160407T212151Z.wav_chan0.xml	0	0
07/04/2016 21:36	AMAR375.9.20160407T213618Z.wav_chan0.xml	0	0
07/04/2016 21:50	AMAR375.9.20160407T215045Z.wav_chan0.xml	0	0
07/04/2016 22:05	AMAR375.9.20160407T220512Z.wav_chan0.xml	0	0
07/04/2016 22:19	AMAR375.9.20160407T221939Z.wav_chan0.xml	0	0
07/04/2016 22:34	AMAR375.9.20160407T223406Z.wav_chan0.xml	0	0
07/04/2016 22:48	AMAR375.9.20160407T224833Z.wav_chan0.xml	0	0
07/04/2016 23:03	AMAR375.9.20160407T230300Z.wav_chan0.xml	0	0
07/04/2016 23:17	AMAR375.9.20160407T231727Z.wav_chan0.xml	0	0
07/04/2016 23:31	AMAR375.9.20160407T233154Z.wav_chan0.xml	0	0
07/04/2016 23:46	AMAR375.9.20160407T234621Z.wav_chan0.xml	0	0
08/04/2016 0:00	AMAR375.9.20160408T000048Z.wav_chan0.xml	0	0
08/04/2016 0:15	AMAR375.9.20160408T001515Z.wav_chan0.xml	0	0
08/04/2016 0:29	AMAR375.9.20160408T002942Z.wav_chan0.xml	0	0
08/04/2016 0:44	AMAR375.9.20160408T004409Z.wav_chan0.xml	0	0
08/04/2016 0:58	AMAR375.9.20160408T005836Z.wav_chan0.xml	0	0
08/04/2016 1:13	AMAR375.9.20160408T011303Z.wav_chan0.xml	0	0
08/04/2016 1:27	AMAR375.9.20160408T012730Z.wav_chan0.xml	1	0
08/04/2016 1:41	AMAR375.9.20160408T014157Z.wav_chan0.xml	0	0
08/04/2016 1:56	AMAR375.9.20160408T015624Z.wav_chan0.xml	0	0
08/04/2016 2:10	AMAR375.9.20160408T021051Z.wav_chan0.xml	0	0
08/04/2016 2:25	AMAR375.9.20160408T022518Z.wav_chan0.xml	0	0
08/04/2016 2:39	AMAR375.9.20160408T023945Z.wav_chan0.xml	0	0
08/04/2016 2:54	AMAR375.9.20160408T025412Z.wav_chan0.xml	6	0
08/04/2016 3:08	AMAR375.9.20160408T030839Z.wav_chan0.xml	0	0
08/04/2016 3:23	AMAR375.9.20160408T032306Z.wav_chan0.xml	0	0
08/04/2016 3:37	AMAR375.9.20160408T033733Z.wav_chan0.xml	0	0
08/04/2016 3:52	AMAR375.9.20160408T035200Z.wav_chan0.xml	0	0
08/04/2016 4:06	AMAR375.9.20160408T040627Z.wav_chan0.xml	0	0
08/04/2016 4:20	AMAR375.9.20160408T042054Z.wav_chan0.xml	0	0
08/04/2016 4:35	AMAR375.9.20160408T043521Z.wav_chan0.xml	0	0
08/04/2016 4:49	AMAR375.9.20160408T044948Z.wav_chan0.xml	0	0
08/04/2016 5:04	AMAR375.9.20160408T050415Z.wav_chan0.xml	0	0
08/04/2016 5:18	AMAR375.9.20160408T051842Z.wav_chan0.xml	0	0
08/04/2016 5:33	AMAR375.9.20160408T053309Z.wav_chan0.xml	0	0
08/04/2016 5:47	AMAR375.9.20160408T054736Z.wav_chan0.xml	0	0
08/04/2016 6:02	AMAR375.9.20160408T060203Z.wav_chan0.xml	8	0
08/04/2016 6:16	AMAR375.9.20160408T061630Z.wav_chan0.xml	1	0
08/04/2016 6:30	AMAR375.9.20160408T063057Z.wav_chan0.xml	3	0
08/04/2016 6:45	AMAR375.9.20160408T064524Z.wav_chan0.xml	0	0
08/04/2016 6:59	AMAR375.9.20160408T065951Z.wav_chan0.xml	0	0
08/04/2016 7:14	AMAR375.9.20160408T071418Z.wav_chan0.xml	0	0
08/04/2016 7:28	AMAR375.9.20160408T072845Z.wav_chan0.xml	0	0
08/04/2016 7:43	AMAR375.9.20160408T074312Z.wav_chan0.xml	0	0
08/04/2016 7:57	AMAR375.9.20160408T075739Z.wav_chan0.xml	0	0
08/04/2016 8:12	AMAR375.9.20160408T081206Z.wav_chan0.xml	0	0
08/04/2016 8:26	AMAR375.9.20160408T082633Z.wav_chan0.xml	0	0
08/04/2016 8:41	AMAR375.9.20160408T084100Z.wav_chan0.xml	0	0
08/04/2016 8:55	AMAR375.9.20160408T085527Z.wav_chan0.xml	0	0
08/04/2016 9:09	AMAR375.9.20160408T090954Z.wav_chan0.xml	0	0
08/04/2016 9:24	AMAR375.9.20160408T092421Z.wav_chan0.xml	0	0
08/04/2016 9:38	AMAR375.9.20160408T093848Z.wav_chan0.xml	0	0
08/04/2016 9:53	AMAR375.9.20160408T095315Z.wav_chan0.xml	0	0
08/04/2016 10:07	AMAR375.9.20160408T100742Z.wav_chan0.xml	0	0
08/04/2016 10:22	AMAR375.9.20160408T102209Z.wav_chan0.xml	0	0
08/04/2016 10:36	AMAR375.9.20160408T103636Z.wav_chan0.xml	0	0
08/04/2016 10:51	AMAR375.9.20160408T105103Z.wav_chan0.xml	0	0
08/04/2016 11:05	AMAR375.9.20160408T110530Z.wav_chan0.xml	0	0
08/04/2016 11:19	AMAR375.9.20160408T111957Z.wav_chan0.xml	0	0
08/04/2016 11:34	AMAR375.9.20160408T113424Z.wav_chan0.xml	0	0
08/04/2016 11:48	AMAR375.9.20160408T114851Z.wav_chan0.xml	0	0
08/04/2016 12:03	AMAR375.9.20160408T120318Z.wav_chan0.xml	0	0
08/04/2016 12:17	AMAR375.9.20160408T121745Z.wav_chan0.xml	0	0
08/04/2016 12:32	AMAR375.9.20160408T123212Z.wav_chan0.xml	0	0
08/04/2016 12:46	AMAR375.9.20160408T124639Z.wav_chan0.xml	0	0
08/04/2016 13:01	AMAR375.9.20160408T130106Z.wav_chan0.xml	0	0
08/04/2016 13:15	AMAR375.9.20160408T131533Z.wav_chan0.xml	0	0
08/04/2016 13:30	AMAR375.9.20160408T133000Z.wav_chan0.xml	0	0
08/04/2016 13:44	AMAR375.9.20160408T134427Z.wav_chan0.xml	0	0
08/04/2016 13:58	AMAR375.9.20160408T135854Z.wav_chan0.xml	0	0
08/04/2016 14:13	AMAR375.9.20160408T141321Z.wav_chan0.xml	0	0
08/04/2016 14:27	AMAR375.9.20160408T142748Z.wav_chan0.xml	0	0
08/04/2016 14:42	AMAR375.9.20160408T144215Z.wav_chan0.xml	0	0
08/04/2016 14:56	AMAR375.9.20160408T145642Z.wav_chan0.xml	0	0
08/04/2016 15:11	AMAR375.9.20160408T151109Z.wav_chan0.xml	0	0
08/04/2016 15:25	AMAR375.9.20160408T152536Z.wav_chan0.xml	0	0
08/04/2016 15:40	AMAR375.9.20160408T154003Z.wav_chan0.xml	0	0
08/04/2016 15:54	AMAR375.9.20160408T155430Z.wav_chan0.xml	0	0
08/04/2016 16:08	AMAR375.9.20160408T160857Z.wav_chan0.xml	0	0
08/04/2016 16:23	AMAR375.9.20160408T162324Z.wav_chan0.xml	0	0
08/04/2016 16:37	AMAR375.9.20160408T163751Z.wav_chan0.xml	0	0
08/04/2016 16:52	AMAR375.9.20160408T165218Z.wav_chan0.xml	0	0
08/04/2016 17:06	AMAR375.9.20160408T170645Z.wav_chan0.xml	0	0
08/04/2016 17:21	AMAR375.9.20160408T172112Z.wav_chan0.xml	0	0
08/04/2016 17:35	AMAR375.9.20160408T173539Z.wav_chan0.xml	0	0
08/04/2016 17:50	AMAR375.9.20160408T175006Z.wav_chan0.xml	0	0
08/04/2016 18:04	AMAR375.9.20160408T180433Z.wav_chan0.xml	0	0
08/04/2016 18:19	AMAR375.9.20160408T181900Z.wav_chan0.xml	0	0
08/04/2016 18:33	AMAR375.9.20160408T183327Z.wav_chan0.xml	0	0
08/04/2016 18:47	AMAR375.9.20160408T184754Z.wav_chan0.xml	0	0
08/04/2016 19:02	AMAR375.9.20160408T190221Z.wav_chan0.xml	0	0
08/04/2016 19:16	AMAR375.9.20160408T191648Z.wav_chan0.xml	0	0
08/04/2016 19:31	AMAR375.9.20160408T193115Z.wav_chan0.xml	0	0
08/04/2016 19:45	AMAR375.9.20160408T194542Z.wav_chan0.xml	0	0
08/04/2016 20:00	AMAR375.9.20160408T200009Z.wav_chan0.xml	0	0
08/04/2016 20:14	AMAR375.9.20160408T201436Z.wav_chan0.xml	0	0
08/04/2016 20:29	AMAR375.9.20160408T202903Z.wav_chan0.xml	0	0
08/04/2016 20:43	AMAR375.9.20160408T204330Z.wav_chan0.xml	0	0
08/04/2016 20:57	AMAR375.9.20160408T205757Z.wav_chan0.xml	0	0
08/04/2016 21:12	AMAR375.9.20160408T211224Z.wav_chan0.xml	0	0
08/04/2016 21:26	AMAR375.9.20160408T212651Z.wav_chan0.xml	0	0
08/04/2016 21:41	AMAR375.9.20160408T214118Z.wav_chan0.xml	0	0
08/04/2016 21:55	AMAR375.9.20160408T215545Z.wav_chan0.xml	0	0
08/04/2016 22:10	AMAR375.9.20160408T221012Z.wav_chan0.xml	0	0
08/04/2016 22:24	AMAR375.9.20160408T222439Z.wav_chan0.xml	0	0
08/04/2016 22:39	AMAR375.9.20160408T223906Z.wav_chan0.xml	0	0
08/04/2016 22:53	AMAR375.9.20160408T225333Z.wav_chan0.xml	0	0
08/04/2016 23:08	AMAR375.9.20160408T230800Z.wav_chan0.xml	0	0
08/04/2016 23:22	AMAR375.9.20160408T232227Z.wav_chan0.xml	0	0
08/04/2016 23:36	AMAR375.9.20160408T233654Z.wav_chan0.xml	17	0
08/04/2016 23:51	AMAR375.9.20160408T235121Z.wav_chan0.xml	0	0
09/04/2016 0:05	AMAR375.9.20160409T000548Z.wav_chan0.xml	0	0
09/04/2016 0:20	AMAR375.9.20160409T002015Z.wav_chan0.xml	0	0
09/04/2016 0:34	AMAR375.9.20160409T003442Z.wav_chan0.xml	0	0
09/04/2016 0:49	AMAR375.9.20160409T004909Z.wav_chan0.xml	0	0
09/04/2016 1:03	AMAR375.9.20160409T010336Z.wav_chan0.xml	0	0
09/04/2016 1:18	AMAR375.9.20160409T011803Z.wav_chan0.xml	0	0
09/04/2016 1:32	AMAR375.9.20160409T013230Z.wav_chan0.xml	0	0
09/04/2016 1:46	AMAR375.9.20160409T014657Z.wav_chan0.xml	0	0
09/04/2016 2:01	AMAR375.9.20160409T020124Z.wav_chan0.xml	0	0
09/04/2016 2:15	AMAR375.9.20160409T021551Z.wav_chan0.xml	0	0
09/04/2016 2:30	AMAR375.9.20160409T023018Z.wav_chan0.xml	3	0
09/04/2016 2:44	AMAR375.9.20160409T024445Z.wav_chan0.xml	0	0
09/04/2016 2:59	AMAR375.9.20160409T025912Z.wav_chan0.xml	0	0
09/04/2016 3:13	AMAR375.9.20160409T031339Z.wav_chan0.xml	0	0
09/04/2016 3:28	AMAR375.9.20160409T032806Z.wav_chan0.xml	0	0
09/04/2016 3:42	AMAR375.9.20160409T034233Z.wav_chan0.xml	0	0
09/04/2016 3:57	AMAR375.9.20160409T035700Z.wav_chan0.xml	0	0
09/04/2016 4:11	AMAR375.9.20160409T041127Z.wav_chan0.xml	0	0
09/04/2016 4:25	AMAR375.9.20160409T042554Z.wav_chan0.xml	0	0
09/04/2016 4:40	AMAR375.9.20160409T044021Z.wav_chan0.xml	0	0
09/04/2016 4:54	AMAR375.9.20160409T045448Z.wav_chan0.xml	0	0
09/04/2016 5:09	AMAR375.9.20160409T050915Z.wav_chan0.xml	0	0
09/04/2016 5:23	AMAR375.9.20160409T052342Z.wav_chan0.xml	0	0
09/04/2016 5:38	AMAR375.9.20160409T053809Z.wav_chan0.xml	0	0
09/04/2016 5:52	AMAR375.9.20160409T055236Z.wav_chan0.xml	0	0
09/04/2016 6:07	AMAR375.9.20160409T060703Z.wav_chan0.xml	0	0
09/04/2016 6:21	AMAR375.9.20160409T062130Z.wav_chan0.xml	0	0
09/04/2016 6:35	AMAR375.9.20160409T063557Z.wav_chan0.xml	0	0
09/04/2016 6:50	AMAR375.9.20160409T065024Z.wav_chan0.xml	0	0
09/04/2016 7:04	AMAR375.9.20160409T070451Z.wav_chan0.xml	0	0
09/04/2016 7:19	AMAR375.9.20160409T071918Z.wav_chan0.xml	0	0
09/04/2016 7:33	AMAR375.9.20160409T073345Z.wav_chan0.xml	0	0
09/04/2016 7:48	AMAR375.9.20160409T074812Z.wav_chan0.xml	0	0
09/04/2016 8:02	AMAR375.9.20160409T080239Z.wav_chan0.xml	0	0
09/04/2016 8:17	AMAR375.9.20160409T081706Z.wav_chan0.xml	0	0
09/04/2016 8:31	AMAR375.9.20160409T083133Z.wav_chan0.xml	2	0
09/04/2016 8:46	AMAR375.9.20160409T084600Z.wav_chan0.xml	0	0
09/04/2016 9:00	AMAR375.9.20160409T090027Z.wav_chan0.xml	0	0
09/04/2016 9:14	AMAR375.9.20160409T091454Z.wav_chan0.xml	0	0
09/04/2016 9:29	AMAR375.9.20160409T092921Z.wav_chan0.xml	0	0
09/04/2016 9:43	AMAR375.9.20160409T094348Z.wav_chan0.xml	0	0
09/04/2016 9:58	AMAR375.9.20160409T095815Z.wav_chan0.xml	0	0
09/04/2016 10:12	AMAR375.9.20160409T101242Z.wav_chan0.xml	0	0
09/04/2016 10:27	AMAR375.9.20160409T102709Z.wav_chan0.xml	0	0
09/04/2016 10:41	AMAR375.9.20160409T104136Z.wav_chan0.xml	0	0
09/04/2016 10:56	AMAR375.9.20160409T105603Z.wav_chan0.xml	0	0
09/04/2016 11:10	AMAR375.9.20160409T111030Z.wav_chan0.xml	0	0
09/04/2016 11:24	AMAR375.9.20160409T112457Z.wav_chan0.xml	0	0
09/04/2016 11:39	AMAR375.9.20160409T113924Z.wav_chan0.xml	0	0
09/04/2016 11:53	AMAR375.9.20160409T115351Z.wav_chan0.xml	0	0
09/04/2016 12:08	AMAR375.9.20160409T120818Z.wav_chan0.xml	0	0
09/04/2016 12:22	AMAR375.9.20160409T122245Z.wav_chan0.xml	0	0
09/04/2016 12:37	AMAR375.9.20160409T123712Z.wav_chan0.xml	0	0
09/04/2016 12:51	AMAR375.9.20160409T125139Z.wav_chan0.xml	0	0
09/04/2016 13:06	AMAR375.9.20160409T130606Z.wav_chan0.xml	0	0
09/04/2016 13:20	AMAR375.9.20160409T132033Z.wav_chan0.xml	0	0
09/04/2016 13:35	AMAR375.9.20160409T133500Z.wav_chan0.xml	0	0
09/04/2016 13:49	AMAR375.9.20160409T134927Z.wav_chan0.xml	0	0
09/04/2016 14:03	AMAR375.9.20160409T140354Z.wav_chan0.xml	0	1
09/04/2016 14:18	AMAR375.9.20160409T141821Z.wav_chan0.xml	0	0
09/04/2016 14:32	AMAR375.9.20160409T143248Z.wav_chan0.xml	0	0
09/04/2016 14:47	AMAR375.9.20160409T144715Z.wav_chan0.xml	0	0
09/04/2016 15:01	AMAR375.9.20160409T150142Z.wav_chan0.xml	0	0
09/04/2016 15:16	AMAR375.9.20160409T151609Z.wav_chan0.xml	0	0
09/04/2016 15:30	AMAR375.9.20160409T153036Z.wav_chan0.xml	0	0
09/04/2016 15:45	AMAR375.9.20160409T154503Z.wav_chan0.xml	0	0
09/04/2016 15:59	AMAR375.9.20160409T155930Z.wav_chan0.xml	1	0
09/04/2016 16:13	AMAR375.9.20160409T161357Z.wav_chan0.xml	0	0
09/04/2016 16:28	AMAR375.9.20160409T162824Z.wav_chan0.xml	0	0
09/04/2016 16:42	AMAR375.9.20160409T164251Z.wav_chan0.xml	0	0
09/04/2016 16:57	AMAR375.9.20160409T165718Z.wav_chan0.xml	0	0
09/04/2016 17:11	AMAR375.9.20160409T171145Z.wav_chan0.xml	0	0
09/04/2016 17:26	AMAR375.9.20160409T172612Z.wav_chan0.xml	0	0
09/04/2016 17:40	AMAR375.9.20160409T174039Z.wav_chan0.xml	0	0
09/04/2016 17:55	AMAR375.9.20160409T175506Z.wav_chan0.xml	0	0
09/04/2016 18:09	AMAR375.9.20160409T180933Z.wav_chan0.xml	0	0
09/04/2016 18:24	AMAR375.9.20160409T182400Z.wav_chan0.xml	0	0
09/04/2016 18:38	AMAR375.9.20160409T183827Z.wav_chan0.xml	0	0
09/04/2016 18:52	AMAR375.9.20160409T185254Z.wav_chan0.xml	11	0
09/04/2016 19:07	AMAR375.9.20160409T190721Z.wav_chan0.xml	2	0
09/04/2016 19:21	AMAR375.9.20160409T192148Z.wav_chan0.xml	0	0
09/04/2016 19:36	AMAR375.9.20160409T193615Z.wav_chan0.xml	4	0
09/04/2016 19:50	AMAR375.9.20160409T195042Z.wav_chan0.xml	0	0
09/04/2016 20:05	AMAR375.9.20160409T200509Z.wav_chan0.xml	0	0
09/04/2016 20:19	AMAR375.9.20160409T201936Z.wav_chan0.xml	0	0
09/04/2016 20:34	AMAR375.9.20160409T203403Z.wav_chan0.xml	0	0
09/04/2016 20:48	AMAR375.9.20160409T204830Z.wav_chan0.xml	0	0
09/04/2016 21:02	AMAR375.9.20160409T210257Z.wav_chan0.xml	0	0
[truncated: 9,245 more rows]
