# Supplementary material for: Signals from the deep: Spatial and temporal acoustic occurrence of beaked whales off western Ireland
Source: PLoS One. 2018 Jun 21;13(6):e0199431. doi: 10.1371/journal.pone.0199431 (PMC6013249; doi:10.1371/journal.pone.0199431)
Supplement: S21 Dataset — (CSV) [file pone.0199431.s021.csv]

Time	File	Sowerbys
21/03/2016 7:15	AMAR371.9.20160321T071526Z.wav_chan0.xml	0
21/03/2016 7:29	AMAR371.9.20160321T072953Z.wav_chan0.xml	0
21/03/2016 7:44	AMAR371.9.20160321T074420Z.wav_chan0.xml	0
21/03/2016 7:58	AMAR371.9.20160321T075847Z.wav_chan0.xml	0
21/03/2016 8:13	AMAR371.9.20160321T081314Z.wav_chan0.xml	0
21/03/2016 8:27	AMAR371.9.20160321T082741Z.wav_chan0.xml	0
21/03/2016 8:42	AMAR371.9.20160321T084208Z.wav_chan0.xml	0
21/03/2016 8:56	AMAR371.9.20160321T085635Z.wav_chan0.xml	0
21/03/2016 9:11	AMAR371.9.20160321T091102Z.wav_chan0.xml	0
21/03/2016 9:25	AMAR371.9.20160321T092529Z.wav_chan0.xml	0
21/03/2016 9:39	AMAR371.9.20160321T093956Z.wav_chan0.xml	0
21/03/2016 9:54	AMAR371.9.20160321T095423Z.wav_chan0.xml	0
21/03/2016 10:08	AMAR371.9.20160321T100850Z.wav_chan0.xml	0
21/03/2016 10:23	AMAR371.9.20160321T102317Z.wav_chan0.xml	0
21/03/2016 10:37	AMAR371.9.20160321T103744Z.wav_chan0.xml	0
21/03/2016 10:52	AMAR371.9.20160321T105211Z.wav_chan0.xml	0
21/03/2016 11:06	AMAR371.9.20160321T110638Z.wav_chan0.xml	0
21/03/2016 11:21	AMAR371.9.20160321T112105Z.wav_chan0.xml	0
21/03/2016 11:35	AMAR371.9.20160321T113532Z.wav_chan0.xml	0
21/03/2016 11:49	AMAR371.9.20160321T114959Z.wav_chan0.xml	0
21/03/2016 12:04	AMAR371.9.20160321T120426Z.wav_chan0.xml	0
21/03/2016 12:18	AMAR371.9.20160321T121853Z.wav_chan0.xml	0
21/03/2016 12:33	AMAR371.9.20160321T123320Z.wav_chan0.xml	0
21/03/2016 12:47	AMAR371.9.20160321T124747Z.wav_chan0.xml	0
21/03/2016 13:02	AMAR371.9.20160321T130214Z.wav_chan0.xml	0
21/03/2016 13:16	AMAR371.9.20160321T131641Z.wav_chan0.xml	0
21/03/2016 13:31	AMAR371.9.20160321T133108Z.wav_chan0.xml	0
21/03/2016 13:45	AMAR371.9.20160321T134535Z.wav_chan0.xml	0
21/03/2016 14:00	AMAR371.9.20160321T140002Z.wav_chan0.xml	0
21/03/2016 14:14	AMAR371.9.20160321T141429Z.wav_chan0.xml	0
21/03/2016 14:28	AMAR371.9.20160321T142856Z.wav_chan0.xml	0
21/03/2016 14:43	AMAR371.9.20160321T144323Z.wav_chan0.xml	0
21/03/2016 14:57	AMAR371.9.20160321T145750Z.wav_chan0.xml	0
21/03/2016 15:12	AMAR371.9.20160321T151217Z.wav_chan0.xml	0
21/03/2016 15:26	AMAR371.9.20160321T152644Z.wav_chan0.xml	0
21/03/2016 15:41	AMAR371.9.20160321T154111Z.wav_chan0.xml	0
21/03/2016 15:55	AMAR371.9.20160321T155538Z.wav_chan0.xml	0
21/03/2016 16:10	AMAR371.9.20160321T161005Z.wav_chan0.xml	0
21/03/2016 16:24	AMAR371.9.20160321T162432Z.wav_chan0.xml	0
21/03/2016 16:38	AMAR371.9.20160321T163859Z.wav_chan0.xml	0
21/03/2016 16:53	AMAR371.9.20160321T165326Z.wav_chan0.xml	0
21/03/2016 17:07	AMAR371.9.20160321T170753Z.wav_chan0.xml	0
21/03/2016 17:22	AMAR371.9.20160321T172220Z.wav_chan0.xml	0
21/03/2016 17:36	AMAR371.9.20160321T173647Z.wav_chan0.xml	0
21/03/2016 17:51	AMAR371.9.20160321T175114Z.wav_chan0.xml	0
21/03/2016 18:05	AMAR371.9.20160321T180541Z.wav_chan0.xml	0
21/03/2016 18:20	AMAR371.9.20160321T182008Z.wav_chan0.xml	0
21/03/2016 18:34	AMAR371.9.20160321T183435Z.wav_chan0.xml	4
21/03/2016 18:49	AMAR371.9.20160321T184902Z.wav_chan0.xml	0
21/03/2016 19:03	AMAR371.9.20160321T190329Z.wav_chan0.xml	0
21/03/2016 19:17	AMAR371.9.20160321T191756Z.wav_chan0.xml	0
21/03/2016 19:32	AMAR371.9.20160321T193223Z.wav_chan0.xml	0
21/03/2016 19:46	AMAR371.9.20160321T194650Z.wav_chan0.xml	0
21/03/2016 20:01	AMAR371.9.20160321T200117Z.wav_chan0.xml	0
21/03/2016 20:15	AMAR371.9.20160321T201544Z.wav_chan0.xml	0
21/03/2016 20:30	AMAR371.9.20160321T203011Z.wav_chan0.xml	0
21/03/2016 20:44	AMAR371.9.20160321T204438Z.wav_chan0.xml	0
21/03/2016 20:59	AMAR371.9.20160321T205905Z.wav_chan0.xml	0
21/03/2016 21:13	AMAR371.9.20160321T211332Z.wav_chan0.xml	0
21/03/2016 21:27	AMAR371.9.20160321T212759Z.wav_chan0.xml	0
21/03/2016 21:42	AMAR371.9.20160321T214226Z.wav_chan0.xml	0
21/03/2016 21:56	AMAR371.9.20160321T215653Z.wav_chan0.xml	0
21/03/2016 22:11	AMAR371.9.20160321T221120Z.wav_chan0.xml	0
21/03/2016 22:25	AMAR371.9.20160321T222547Z.wav_chan0.xml	0
21/03/2016 22:40	AMAR371.9.20160321T224014Z.wav_chan0.xml	0
21/03/2016 22:54	AMAR371.9.20160321T225441Z.wav_chan0.xml	0
21/03/2016 23:09	AMAR371.9.20160321T230908Z.wav_chan0.xml	0
21/03/2016 23:23	AMAR371.9.20160321T232335Z.wav_chan0.xml	0
21/03/2016 23:38	AMAR371.9.20160321T233802Z.wav_chan0.xml	0
21/03/2016 23:52	AMAR371.9.20160321T235229Z.wav_chan0.xml	0
22/03/2016 0:06	AMAR371.9.20160322T000656Z.wav_chan0.xml	0
22/03/2016 0:21	AMAR371.9.20160322T002123Z.wav_chan0.xml	0
22/03/2016 0:35	AMAR371.9.20160322T003550Z.wav_chan0.xml	0
22/03/2016 0:50	AMAR371.9.20160322T005017Z.wav_chan0.xml	0
22/03/2016 1:04	AMAR371.9.20160322T010444Z.wav_chan0.xml	0
22/03/2016 1:19	AMAR371.9.20160322T011911Z.wav_chan0.xml	0
22/03/2016 1:33	AMAR371.9.20160322T013338Z.wav_chan0.xml	0
22/03/2016 1:48	AMAR371.9.20160322T014805Z.wav_chan0.xml	0
22/03/2016 2:02	AMAR371.9.20160322T020232Z.wav_chan0.xml	0
22/03/2016 2:16	AMAR371.9.20160322T021659Z.wav_chan0.xml	0
22/03/2016 2:31	AMAR371.9.20160322T023126Z.wav_chan0.xml	0
22/03/2016 2:45	AMAR371.9.20160322T024553Z.wav_chan0.xml	0
22/03/2016 3:00	AMAR371.9.20160322T030020Z.wav_chan0.xml	0
22/03/2016 3:14	AMAR371.9.20160322T031447Z.wav_chan0.xml	0
22/03/2016 3:29	AMAR371.9.20160322T032914Z.wav_chan0.xml	0
22/03/2016 3:43	AMAR371.9.20160322T034341Z.wav_chan0.xml	0
22/03/2016 3:58	AMAR371.9.20160322T035808Z.wav_chan0.xml	0
22/03/2016 4:12	AMAR371.9.20160322T041235Z.wav_chan0.xml	0
22/03/2016 4:27	AMAR371.9.20160322T042702Z.wav_chan0.xml	0
22/03/2016 4:41	AMAR371.9.20160322T044129Z.wav_chan0.xml	0
22/03/2016 4:55	AMAR371.9.20160322T045556Z.wav_chan0.xml	0
22/03/2016 5:10	AMAR371.9.20160322T051023Z.wav_chan0.xml	0
22/03/2016 5:24	AMAR371.9.20160322T052450Z.wav_chan0.xml	0
22/03/2016 5:39	AMAR371.9.20160322T053917Z.wav_chan0.xml	0
22/03/2016 5:53	AMAR371.9.20160322T055344Z.wav_chan0.xml	0
22/03/2016 6:08	AMAR371.9.20160322T060811Z.wav_chan0.xml	0
22/03/2016 6:22	AMAR371.9.20160322T062238Z.wav_chan0.xml	0
22/03/2016 6:37	AMAR371.9.20160322T063705Z.wav_chan0.xml	0
22/03/2016 6:51	AMAR371.9.20160322T065132Z.wav_chan0.xml	0
22/03/2016 7:05	AMAR371.9.20160322T070559Z.wav_chan0.xml	0
22/03/2016 7:20	AMAR371.9.20160322T072026Z.wav_chan0.xml	0
22/03/2016 7:34	AMAR371.9.20160322T073453Z.wav_chan0.xml	0
22/03/2016 7:49	AMAR371.9.20160322T074920Z.wav_chan0.xml	0
22/03/2016 8:03	AMAR371.9.20160322T080347Z.wav_chan0.xml	0
22/03/2016 8:18	AMAR371.9.20160322T081814Z.wav_chan0.xml	0
22/03/2016 8:32	AMAR371.9.20160322T083241Z.wav_chan0.xml	0
22/03/2016 8:47	AMAR371.9.20160322T084708Z.wav_chan0.xml	0
22/03/2016 9:01	AMAR371.9.20160322T090135Z.wav_chan0.xml	0
22/03/2016 9:16	AMAR371.9.20160322T091602Z.wav_chan0.xml	0
22/03/2016 9:30	AMAR371.9.20160322T093029Z.wav_chan0.xml	0
22/03/2016 9:44	AMAR371.9.20160322T094456Z.wav_chan0.xml	0
22/03/2016 9:59	AMAR371.9.20160322T095923Z.wav_chan0.xml	0
22/03/2016 10:13	AMAR371.9.20160322T101350Z.wav_chan0.xml	0
22/03/2016 10:28	AMAR371.9.20160322T102817Z.wav_chan0.xml	0
22/03/2016 10:42	AMAR371.9.20160322T104244Z.wav_chan0.xml	0
22/03/2016 10:57	AMAR371.9.20160322T105711Z.wav_chan0.xml	0
22/03/2016 11:11	AMAR371.9.20160322T111138Z.wav_chan0.xml	0
22/03/2016 11:26	AMAR371.9.20160322T112605Z.wav_chan0.xml	0
22/03/2016 11:40	AMAR371.9.20160322T114032Z.wav_chan0.xml	0
22/03/2016 11:54	AMAR371.9.20160322T115459Z.wav_chan0.xml	0
22/03/2016 12:09	AMAR371.9.20160322T120926Z.wav_chan0.xml	0
22/03/2016 12:23	AMAR371.9.20160322T122353Z.wav_chan0.xml	0
22/03/2016 12:38	AMAR371.9.20160322T123820Z.wav_chan0.xml	0
22/03/2016 12:52	AMAR371.9.20160322T125247Z.wav_chan0.xml	0
22/03/2016 13:07	AMAR371.9.20160322T130714Z.wav_chan0.xml	0
22/03/2016 13:21	AMAR371.9.20160322T132141Z.wav_chan0.xml	0
22/03/2016 13:36	AMAR371.9.20160322T133608Z.wav_chan0.xml	0
22/03/2016 13:50	AMAR371.9.20160322T135035Z.wav_chan0.xml	0
22/03/2016 14:05	AMAR371.9.20160322T140502Z.wav_chan0.xml	0
22/03/2016 14:19	AMAR371.9.20160322T141929Z.wav_chan0.xml	0
22/03/2016 14:33	AMAR371.9.20160322T143356Z.wav_chan0.xml	0
22/03/2016 14:48	AMAR371.9.20160322T144823Z.wav_chan0.xml	0
22/03/2016 15:02	AMAR371.9.20160322T150250Z.wav_chan0.xml	0
22/03/2016 15:17	AMAR371.9.20160322T151717Z.wav_chan0.xml	0
22/03/2016 15:31	AMAR371.9.20160322T153144Z.wav_chan0.xml	0
22/03/2016 15:46	AMAR371.9.20160322T154611Z.wav_chan0.xml	0
22/03/2016 16:00	AMAR371.9.20160322T160038Z.wav_chan0.xml	0
22/03/2016 16:15	AMAR371.9.20160322T161505Z.wav_chan0.xml	0
22/03/2016 16:29	AMAR371.9.20160322T162932Z.wav_chan0.xml	0
22/03/2016 16:43	AMAR371.9.20160322T164359Z.wav_chan0.xml	0
22/03/2016 16:58	AMAR371.9.20160322T165826Z.wav_chan0.xml	0
22/03/2016 17:12	AMAR371.9.20160322T171253Z.wav_chan0.xml	0
22/03/2016 17:27	AMAR371.9.20160322T172720Z.wav_chan0.xml	0
22/03/2016 17:41	AMAR371.9.20160322T174147Z.wav_chan0.xml	0
22/03/2016 17:56	AMAR371.9.20160322T175614Z.wav_chan0.xml	0
22/03/2016 18:10	AMAR371.9.20160322T181041Z.wav_chan0.xml	0
22/03/2016 18:25	AMAR371.9.20160322T182508Z.wav_chan0.xml	5
22/03/2016 18:39	AMAR371.9.20160322T183935Z.wav_chan0.xml	0
22/03/2016 18:54	AMAR371.9.20160322T185402Z.wav_chan0.xml	0
22/03/2016 19:08	AMAR371.9.20160322T190829Z.wav_chan0.xml	0
22/03/2016 19:22	AMAR371.9.20160322T192256Z.wav_chan0.xml	0
22/03/2016 19:37	AMAR371.9.20160322T193723Z.wav_chan0.xml	0
22/03/2016 19:51	AMAR371.9.20160322T195150Z.wav_chan0.xml	0
22/03/2016 20:06	AMAR371.9.20160322T200617Z.wav_chan0.xml	0
22/03/2016 20:20	AMAR371.9.20160322T202044Z.wav_chan0.xml	0
22/03/2016 20:35	AMAR371.9.20160322T203511Z.wav_chan0.xml	0
22/03/2016 20:49	AMAR371.9.20160322T204938Z.wav_chan0.xml	0
22/03/2016 21:04	AMAR371.9.20160322T210405Z.wav_chan0.xml	0
22/03/2016 21:18	AMAR371.9.20160322T211832Z.wav_chan0.xml	0
22/03/2016 21:32	AMAR371.9.20160322T213259Z.wav_chan0.xml	0
22/03/2016 21:47	AMAR371.9.20160322T214726Z.wav_chan0.xml	5
22/03/2016 22:01	AMAR371.9.20160322T220153Z.wav_chan0.xml	0
22/03/2016 22:16	AMAR371.9.20160322T221620Z.wav_chan0.xml	0
22/03/2016 22:30	AMAR371.9.20160322T223047Z.wav_chan0.xml	0
22/03/2016 22:45	AMAR371.9.20160322T224514Z.wav_chan0.xml	0
22/03/2016 22:59	AMAR371.9.20160322T225941Z.wav_chan0.xml	0
22/03/2016 23:14	AMAR371.9.20160322T231408Z.wav_chan0.xml	0
22/03/2016 23:28	AMAR371.9.20160322T232835Z.wav_chan0.xml	2
22/03/2016 23:43	AMAR371.9.20160322T234302Z.wav_chan0.xml	2
22/03/2016 23:57	AMAR371.9.20160322T235729Z.wav_chan0.xml	0
23/03/2016 0:11	AMAR371.9.20160323T001156Z.wav_chan0.xml	0
23/03/2016 0:26	AMAR371.9.20160323T002623Z.wav_chan0.xml	0
23/03/2016 0:40	AMAR371.9.20160323T004050Z.wav_chan0.xml	0
23/03/2016 0:55	AMAR371.9.20160323T005517Z.wav_chan0.xml	0
23/03/2016 1:09	AMAR371.9.20160323T010944Z.wav_chan0.xml	0
23/03/2016 1:24	AMAR371.9.20160323T012411Z.wav_chan0.xml	0
23/03/2016 1:38	AMAR371.9.20160323T013838Z.wav_chan0.xml	0
23/03/2016 1:53	AMAR371.9.20160323T015305Z.wav_chan0.xml	0
23/03/2016 2:07	AMAR371.9.20160323T020732Z.wav_chan0.xml	0
23/03/2016 2:21	AMAR371.9.20160323T022159Z.wav_chan0.xml	0
23/03/2016 2:36	AMAR371.9.20160323T023626Z.wav_chan0.xml	0
23/03/2016 2:50	AMAR371.9.20160323T025053Z.wav_chan0.xml	0
23/03/2016 3:05	AMAR371.9.20160323T030520Z.wav_chan0.xml	0
23/03/2016 3:19	AMAR371.9.20160323T031947Z.wav_chan0.xml	0
23/03/2016 3:34	AMAR371.9.20160323T033414Z.wav_chan0.xml	0
23/03/2016 3:48	AMAR371.9.20160323T034841Z.wav_chan0.xml	0
23/03/2016 4:03	AMAR371.9.20160323T040308Z.wav_chan0.xml	0
23/03/2016 4:17	AMAR371.9.20160323T041735Z.wav_chan0.xml	0
23/03/2016 4:32	AMAR371.9.20160323T043202Z.wav_chan0.xml	0
23/03/2016 4:46	AMAR371.9.20160323T044629Z.wav_chan0.xml	0
23/03/2016 5:00	AMAR371.9.20160323T050056Z.wav_chan0.xml	0
23/03/2016 5:15	AMAR371.9.20160323T051523Z.wav_chan0.xml	0
23/03/2016 5:29	AMAR371.9.20160323T052950Z.wav_chan0.xml	0
23/03/2016 5:44	AMAR371.9.20160323T054417Z.wav_chan0.xml	0
23/03/2016 5:58	AMAR371.9.20160323T055844Z.wav_chan0.xml	0
23/03/2016 6:13	AMAR371.9.20160323T061311Z.wav_chan0.xml	0
23/03/2016 6:27	AMAR371.9.20160323T062738Z.wav_chan0.xml	0
23/03/2016 6:42	AMAR371.9.20160323T064205Z.wav_chan0.xml	0
23/03/2016 6:56	AMAR371.9.20160323T065632Z.wav_chan0.xml	0
23/03/2016 7:10	AMAR371.9.20160323T071059Z.wav_chan0.xml	0
23/03/2016 7:25	AMAR371.9.20160323T072526Z.wav_chan0.xml	0
23/03/2016 7:39	AMAR371.9.20160323T073953Z.wav_chan0.xml	0
23/03/2016 7:54	AMAR371.9.20160323T075420Z.wav_chan0.xml	0
23/03/2016 8:08	AMAR371.9.20160323T080847Z.wav_chan0.xml	0
23/03/2016 8:23	AMAR371.9.20160323T082314Z.wav_chan0.xml	0
23/03/2016 8:37	AMAR371.9.20160323T083741Z.wav_chan0.xml	1
23/03/2016 8:52	AMAR371.9.20160323T085208Z.wav_chan0.xml	0
23/03/2016 9:06	AMAR371.9.20160323T090635Z.wav_chan0.xml	0
23/03/2016 9:21	AMAR371.9.20160323T092102Z.wav_chan0.xml	0
23/03/2016 9:35	AMAR371.9.20160323T093529Z.wav_chan0.xml	0
23/03/2016 9:49	AMAR371.9.20160323T094956Z.wav_chan0.xml	1
23/03/2016 10:04	AMAR371.9.20160323T100423Z.wav_chan0.xml	0
23/03/2016 10:18	AMAR371.9.20160323T101850Z.wav_chan0.xml	0
23/03/2016 10:33	AMAR371.9.20160323T103317Z.wav_chan0.xml	0
23/03/2016 10:47	AMAR371.9.20160323T104744Z.wav_chan0.xml	0
23/03/2016 11:02	AMAR371.9.20160323T110211Z.wav_chan0.xml	0
23/03/2016 11:16	AMAR371.9.20160323T111638Z.wav_chan0.xml	0
23/03/2016 11:31	AMAR371.9.20160323T113105Z.wav_chan0.xml	0
23/03/2016 11:45	AMAR371.9.20160323T114532Z.wav_chan0.xml	0
23/03/2016 11:59	AMAR371.9.20160323T115959Z.wav_chan0.xml	0
23/03/2016 12:14	AMAR371.9.20160323T121426Z.wav_chan0.xml	0
23/03/2016 12:28	AMAR371.9.20160323T122853Z.wav_chan0.xml	0
23/03/2016 12:43	AMAR371.9.20160323T124320Z.wav_chan0.xml	0
23/03/2016 12:57	AMAR371.9.20160323T125747Z.wav_chan0.xml	0
23/03/2016 13:12	AMAR371.9.20160323T131214Z.wav_chan0.xml	0
23/03/2016 13:26	AMAR371.9.20160323T132641Z.wav_chan0.xml	0
23/03/2016 13:41	AMAR371.9.20160323T134108Z.wav_chan0.xml	0
23/03/2016 13:55	AMAR371.9.20160323T135535Z.wav_chan0.xml	0
23/03/2016 14:10	AMAR371.9.20160323T141002Z.wav_chan0.xml	0
23/03/2016 14:24	AMAR371.9.20160323T142429Z.wav_chan0.xml	0
23/03/2016 14:38	AMAR371.9.20160323T143856Z.wav_chan0.xml	0
23/03/2016 14:53	AMAR371.9.20160323T145323Z.wav_chan0.xml	0
23/03/2016 15:07	AMAR371.9.20160323T150750Z.wav_chan0.xml	0
23/03/2016 15:22	AMAR371.9.20160323T152217Z.wav_chan0.xml	0
23/03/2016 15:36	AMAR371.9.20160323T153644Z.wav_chan0.xml	0
23/03/2016 15:51	AMAR371.9.20160323T155111Z.wav_chan0.xml	0
23/03/2016 16:05	AMAR371.9.20160323T160538Z.wav_chan0.xml	0
23/03/2016 16:20	AMAR371.9.20160323T162005Z.wav_chan0.xml	0
23/03/2016 16:34	AMAR371.9.20160323T163432Z.wav_chan0.xml	0
23/03/2016 16:48	AMAR371.9.20160323T164859Z.wav_chan0.xml	0
23/03/2016 17:03	AMAR371.9.20160323T170326Z.wav_chan0.xml	0
23/03/2016 17:17	AMAR371.9.20160323T171753Z.wav_chan0.xml	0
23/03/2016 17:32	AMAR371.9.20160323T173220Z.wav_chan0.xml	0
23/03/2016 17:46	AMAR371.9.20160323T174647Z.wav_chan0.xml	0
23/03/2016 18:01	AMAR371.9.20160323T180114Z.wav_chan0.xml	0
23/03/2016 18:15	AMAR371.9.20160323T181541Z.wav_chan0.xml	0
23/03/2016 18:30	AMAR371.9.20160323T183008Z.wav_chan0.xml	0
23/03/2016 18:44	AMAR371.9.20160323T184435Z.wav_chan0.xml	0
23/03/2016 18:59	AMAR371.9.20160323T185902Z.wav_chan0.xml	0
23/03/2016 19:13	AMAR371.9.20160323T191329Z.wav_chan0.xml	0
23/03/2016 19:27	AMAR371.9.20160323T192756Z.wav_chan0.xml	0
23/03/2016 19:42	AMAR371.9.20160323T194223Z.wav_chan0.xml	0
23/03/2016 19:56	AMAR371.9.20160323T195650Z.wav_chan0.xml	0
23/03/2016 20:11	AMAR371.9.20160323T201117Z.wav_chan0.xml	0
23/03/2016 20:25	AMAR371.9.20160323T202544Z.wav_chan0.xml	0
23/03/2016 20:40	AMAR371.9.20160323T204011Z.wav_chan0.xml	0
23/03/2016 20:54	AMAR371.9.20160323T205438Z.wav_chan0.xml	0
23/03/2016 21:09	AMAR371.9.20160323T210905Z.wav_chan0.xml	0
23/03/2016 21:23	AMAR371.9.20160323T212332Z.wav_chan0.xml	0
23/03/2016 21:37	AMAR371.9.20160323T213759Z.wav_chan0.xml	0
23/03/2016 21:52	AMAR371.9.20160323T215226Z.wav_chan0.xml	0
23/03/2016 22:06	AMAR371.9.20160323T220653Z.wav_chan0.xml	0
23/03/2016 22:21	AMAR371.9.20160323T222120Z.wav_chan0.xml	0
23/03/2016 22:35	AMAR371.9.20160323T223547Z.wav_chan0.xml	0
23/03/2016 22:50	AMAR371.9.20160323T225014Z.wav_chan0.xml	0
23/03/2016 23:04	AMAR371.9.20160323T230441Z.wav_chan0.xml	0
23/03/2016 23:19	AMAR371.9.20160323T231908Z.wav_chan0.xml	0
23/03/2016 23:33	AMAR371.9.20160323T233335Z.wav_chan0.xml	0
23/03/2016 23:48	AMAR371.9.20160323T234802Z.wav_chan0.xml	0
24/03/2016 0:02	AMAR371.9.20160324T000229Z.wav_chan0.xml	0
24/03/2016 0:16	AMAR371.9.20160324T001656Z.wav_chan0.xml	0
24/03/2016 0:31	AMAR371.9.20160324T003123Z.wav_chan0.xml	0
24/03/2016 0:45	AMAR371.9.20160324T004550Z.wav_chan0.xml	0
24/03/2016 1:00	AMAR371.9.20160324T010017Z.wav_chan0.xml	0
24/03/2016 1:14	AMAR371.9.20160324T011444Z.wav_chan0.xml	0
24/03/2016 1:29	AMAR371.9.20160324T012911Z.wav_chan0.xml	0
24/03/2016 1:43	AMAR371.9.20160324T014338Z.wav_chan0.xml	0
24/03/2016 1:58	AMAR371.9.20160324T015805Z.wav_chan0.xml	0
24/03/2016 2:12	AMAR371.9.20160324T021232Z.wav_chan0.xml	0
24/03/2016 2:26	AMAR371.9.20160324T022659Z.wav_chan0.xml	0
24/03/2016 2:41	AMAR371.9.20160324T024126Z.wav_chan0.xml	0
24/03/2016 2:55	AMAR371.9.20160324T025553Z.wav_chan0.xml	0
24/03/2016 3:10	AMAR371.9.20160324T031020Z.wav_chan0.xml	0
24/03/2016 3:24	AMAR371.9.20160324T032447Z.wav_chan0.xml	0
24/03/2016 3:39	AMAR371.9.20160324T033914Z.wav_chan0.xml	0
24/03/2016 3:53	AMAR371.9.20160324T035341Z.wav_chan0.xml	0
24/03/2016 4:08	AMAR371.9.20160324T040808Z.wav_chan0.xml	0
24/03/2016 4:22	AMAR371.9.20160324T042235Z.wav_chan0.xml	0
24/03/2016 4:37	AMAR371.9.20160324T043702Z.wav_chan0.xml	0
24/03/2016 4:51	AMAR371.9.20160324T045129Z.wav_chan0.xml	0
24/03/2016 5:05	AMAR371.9.20160324T050556Z.wav_chan0.xml	0
24/03/2016 5:20	AMAR371.9.20160324T052023Z.wav_chan0.xml	0
24/03/2016 5:34	AMAR371.9.20160324T053450Z.wav_chan0.xml	0
24/03/2016 5:49	AMAR371.9.20160324T054917Z.wav_chan0.xml	0
24/03/2016 6:03	AMAR371.9.20160324T060344Z.wav_chan0.xml	0
24/03/2016 6:18	AMAR371.9.20160324T061811Z.wav_chan0.xml	0
24/03/2016 6:32	AMAR371.9.20160324T063238Z.wav_chan0.xml	0
24/03/2016 6:47	AMAR371.9.20160324T064705Z.wav_chan0.xml	0
24/03/2016 7:01	AMAR371.9.20160324T070132Z.wav_chan0.xml	0
24/03/2016 7:15	AMAR371.9.20160324T071559Z.wav_chan0.xml	0
24/03/2016 7:30	AMAR371.9.20160324T073026Z.wav_chan0.xml	0
24/03/2016 7:44	AMAR371.9.20160324T074453Z.wav_chan0.xml	0
24/03/2016 7:59	AMAR371.9.20160324T075920Z.wav_chan0.xml	0
24/03/2016 8:13	AMAR371.9.20160324T081347Z.wav_chan0.xml	0
24/03/2016 8:28	AMAR371.9.20160324T082814Z.wav_chan0.xml	0
24/03/2016 8:42	AMAR371.9.20160324T084241Z.wav_chan0.xml	0
24/03/2016 8:57	AMAR371.9.20160324T085708Z.wav_chan0.xml	0
24/03/2016 9:11	AMAR371.9.20160324T091135Z.wav_chan0.xml	0
24/03/2016 9:26	AMAR371.9.20160324T092602Z.wav_chan0.xml	0
24/03/2016 9:40	AMAR371.9.20160324T094029Z.wav_chan0.xml	0
24/03/2016 9:54	AMAR371.9.20160324T095456Z.wav_chan0.xml	0
24/03/2016 10:09	AMAR371.9.20160324T100923Z.wav_chan0.xml	0
24/03/2016 10:23	AMAR371.9.20160324T102350Z.wav_chan0.xml	0
24/03/2016 10:38	AMAR371.9.20160324T103817Z.wav_chan0.xml	0
24/03/2016 10:52	AMAR371.9.20160324T105244Z.wav_chan0.xml	0
24/03/2016 11:07	AMAR371.9.20160324T110711Z.wav_chan0.xml	0
24/03/2016 11:21	AMAR371.9.20160324T112138Z.wav_chan0.xml	0
24/03/2016 11:36	AMAR371.9.20160324T113605Z.wav_chan0.xml	0
24/03/2016 11:50	AMAR371.9.20160324T115032Z.wav_chan0.xml	0
24/03/2016 12:04	AMAR371.9.20160324T120459Z.wav_chan0.xml	0
24/03/2016 12:19	AMAR371.9.20160324T121926Z.wav_chan0.xml	0
24/03/2016 12:33	AMAR371.9.20160324T123353Z.wav_chan0.xml	0
24/03/2016 12:48	AMAR371.9.20160324T124820Z.wav_chan0.xml	0
24/03/2016 13:02	AMAR371.9.20160324T130247Z.wav_chan0.xml	0
24/03/2016 13:17	AMAR371.9.20160324T131714Z.wav_chan0.xml	0
24/03/2016 13:31	AMAR371.9.20160324T133141Z.wav_chan0.xml	0
24/03/2016 13:46	AMAR371.9.20160324T134608Z.wav_chan0.xml	0
24/03/2016 14:00	AMAR371.9.20160324T140035Z.wav_chan0.xml	0
24/03/2016 14:15	AMAR371.9.20160324T141502Z.wav_chan0.xml	0
24/03/2016 14:29	AMAR371.9.20160324T142929Z.wav_chan0.xml	0
24/03/2016 14:43	AMAR371.9.20160324T144356Z.wav_chan0.xml	0
24/03/2016 14:58	AMAR371.9.20160324T145823Z.wav_chan0.xml	0
24/03/2016 15:12	AMAR371.9.20160324T151250Z.wav_chan0.xml	0
24/03/2016 15:27	AMAR371.9.20160324T152717Z.wav_chan0.xml	0
24/03/2016 15:41	AMAR371.9.20160324T154144Z.wav_chan0.xml	0
24/03/2016 15:56	AMAR371.9.20160324T155611Z.wav_chan0.xml	0
24/03/2016 16:10	AMAR371.9.20160324T161038Z.wav_chan0.xml	0
24/03/2016 16:25	AMAR371.9.20160324T162505Z.wav_chan0.xml	0
24/03/2016 16:39	AMAR371.9.20160324T163932Z.wav_chan0.xml	0
24/03/2016 16:53	AMAR371.9.20160324T165359Z.wav_chan0.xml	0
24/03/2016 17:08	AMAR371.9.20160324T170826Z.wav_chan0.xml	0
24/03/2016 17:22	AMAR371.9.20160324T172253Z.wav_chan0.xml	0
24/03/2016 17:37	AMAR371.9.20160324T173720Z.wav_chan0.xml	0
24/03/2016 17:51	AMAR371.9.20160324T175147Z.wav_chan0.xml	0
24/03/2016 18:06	AMAR371.9.20160324T180614Z.wav_chan0.xml	0
24/03/2016 18:20	AMAR371.9.20160324T182041Z.wav_chan0.xml	0
24/03/2016 18:35	AMAR371.9.20160324T183508Z.wav_chan0.xml	0
24/03/2016 18:49	AMAR371.9.20160324T184935Z.wav_chan0.xml	0
24/03/2016 19:04	AMAR371.9.20160324T190402Z.wav_chan0.xml	0
24/03/2016 19:18	AMAR371.9.20160324T191829Z.wav_chan0.xml	0
24/03/2016 19:32	AMAR371.9.20160324T193256Z.wav_chan0.xml	0
24/03/2016 19:47	AMAR371.9.20160324T194723Z.wav_chan0.xml	0
24/03/2016 20:01	AMAR371.9.20160324T200150Z.wav_chan0.xml	0
24/03/2016 20:16	AMAR371.9.20160324T201617Z.wav_chan0.xml	0
24/03/2016 20:30	AMAR371.9.20160324T203044Z.wav_chan0.xml	0
24/03/2016 20:45	AMAR371.9.20160324T204511Z.wav_chan0.xml	0
24/03/2016 20:59	AMAR371.9.20160324T205938Z.wav_chan0.xml	0
24/03/2016 21:14	AMAR371.9.20160324T211405Z.wav_chan0.xml	0
24/03/2016 21:28	AMAR371.9.20160324T212832Z.wav_chan0.xml	0
24/03/2016 21:42	AMAR371.9.20160324T214259Z.wav_chan0.xml	1
24/03/2016 21:57	AMAR371.9.20160324T215726Z.wav_chan0.xml	0
24/03/2016 22:11	AMAR371.9.20160324T221153Z.wav_chan0.xml	0
24/03/2016 22:26	AMAR371.9.20160324T222620Z.wav_chan0.xml	0
24/03/2016 22:40	AMAR371.9.20160324T224047Z.wav_chan0.xml	0
24/03/2016 22:55	AMAR371.9.20160324T225514Z.wav_chan0.xml	0
24/03/2016 23:09	AMAR371.9.20160324T230941Z.wav_chan0.xml	0
24/03/2016 23:24	AMAR371.9.20160324T232408Z.wav_chan0.xml	0
24/03/2016 23:38	AMAR371.9.20160324T233835Z.wav_chan0.xml	0
24/03/2016 23:53	AMAR371.9.20160324T235302Z.wav_chan0.xml	0
25/03/2016 0:07	AMAR371.9.20160325T000729Z.wav_chan0.xml	0
25/03/2016 0:21	AMAR371.9.20160325T002156Z.wav_chan0.xml	0
25/03/2016 0:36	AMAR371.9.20160325T003623Z.wav_chan0.xml	0
25/03/2016 0:50	AMAR371.9.20160325T005050Z.wav_chan0.xml	0
25/03/2016 1:05	AMAR371.9.20160325T010517Z.wav_chan0.xml	0
25/03/2016 1:19	AMAR371.9.20160325T011944Z.wav_chan0.xml	0
25/03/2016 1:34	AMAR371.9.20160325T013411Z.wav_chan0.xml	0
25/03/2016 1:48	AMAR371.9.20160325T014838Z.wav_chan0.xml	0
25/03/2016 2:03	AMAR371.9.20160325T020305Z.wav_chan0.xml	0
25/03/2016 2:17	AMAR371.9.20160325T021732Z.wav_chan0.xml	0
25/03/2016 2:31	AMAR371.9.20160325T023159Z.wav_chan0.xml	0
25/03/2016 2:46	AMAR371.9.20160325T024626Z.wav_chan0.xml	0
25/03/2016 3:00	AMAR371.9.20160325T030053Z.wav_chan0.xml	0
25/03/2016 3:15	AMAR371.9.20160325T031520Z.wav_chan0.xml	0
25/03/2016 3:29	AMAR371.9.20160325T032947Z.wav_chan0.xml	0
25/03/2016 3:44	AMAR371.9.20160325T034414Z.wav_chan0.xml	0
25/03/2016 3:58	AMAR371.9.20160325T035841Z.wav_chan0.xml	0
25/03/2016 4:13	AMAR371.9.20160325T041308Z.wav_chan0.xml	0
25/03/2016 4:27	AMAR371.9.20160325T042735Z.wav_chan0.xml	0
25/03/2016 4:42	AMAR371.9.20160325T044202Z.wav_chan0.xml	0
25/03/2016 4:56	AMAR371.9.20160325T045629Z.wav_chan0.xml	0
25/03/2016 5:10	AMAR371.9.20160325T051056Z.wav_chan0.xml	0
25/03/2016 5:25	AMAR371.9.20160325T052523Z.wav_chan0.xml	0
25/03/2016 5:39	AMAR371.9.20160325T053950Z.wav_chan0.xml	0
25/03/2016 5:54	AMAR371.9.20160325T055417Z.wav_chan0.xml	0
25/03/2016 6:08	AMAR371.9.20160325T060844Z.wav_chan0.xml	0
25/03/2016 6:23	AMAR371.9.20160325T062311Z.wav_chan0.xml	0
25/03/2016 6:37	AMAR371.9.20160325T063738Z.wav_chan0.xml	0
25/03/2016 6:52	AMAR371.9.20160325T065205Z.wav_chan0.xml	0
25/03/2016 7:06	AMAR371.9.20160325T070632Z.wav_chan0.xml	0
25/03/2016 7:20	AMAR371.9.20160325T072059Z.wav_chan0.xml	0
25/03/2016 7:35	AMAR371.9.20160325T073526Z.wav_chan0.xml	0
25/03/2016 7:49	AMAR371.9.20160325T074953Z.wav_chan0.xml	0
25/03/2016 8:04	AMAR371.9.20160325T080420Z.wav_chan0.xml	0
25/03/2016 8:18	AMAR371.9.20160325T081847Z.wav_chan0.xml	0
25/03/2016 8:33	AMAR371.9.20160325T083314Z.wav_chan0.xml	0
25/03/2016 8:47	AMAR371.9.20160325T084741Z.wav_chan0.xml	0
25/03/2016 9:02	AMAR371.9.20160325T090208Z.wav_chan0.xml	1
25/03/2016 9:16	AMAR371.9.20160325T091635Z.wav_chan0.xml	0
25/03/2016 9:31	AMAR371.9.20160325T093102Z.wav_chan0.xml	0
25/03/2016 9:45	AMAR371.9.20160325T094529Z.wav_chan0.xml	0
25/03/2016 9:59	AMAR371.9.20160325T095956Z.wav_chan0.xml	0
25/03/2016 10:14	AMAR371.9.20160325T101423Z.wav_chan0.xml	0
25/03/2016 10:28	AMAR371.9.20160325T102850Z.wav_chan0.xml	0
25/03/2016 10:43	AMAR371.9.20160325T104317Z.wav_chan0.xml	0
25/03/2016 10:57	AMAR371.9.20160325T105744Z.wav_chan0.xml	9
25/03/2016 11:12	AMAR371.9.20160325T111211Z.wav_chan0.xml	0
25/03/2016 11:26	AMAR371.9.20160325T112638Z.wav_chan0.xml	0
25/03/2016 11:41	AMAR371.9.20160325T114105Z.wav_chan0.xml	0
25/03/2016 11:55	AMAR371.9.20160325T115532Z.wav_chan0.xml	0
25/03/2016 12:09	AMAR371.9.20160325T120959Z.wav_chan0.xml	0
25/03/2016 12:24	AMAR371.9.20160325T122426Z.wav_chan0.xml	0
25/03/2016 12:38	AMAR371.9.20160325T123853Z.wav_chan0.xml	0
25/03/2016 12:53	AMAR371.9.20160325T125320Z.wav_chan0.xml	0
25/03/2016 13:07	AMAR371.9.20160325T130747Z.wav_chan0.xml	0
25/03/2016 13:22	AMAR371.9.20160325T132214Z.wav_chan0.xml	0
25/03/2016 13:36	AMAR371.9.20160325T133641Z.wav_chan0.xml	0
25/03/2016 13:51	AMAR371.9.20160325T135108Z.wav_chan0.xml	0
25/03/2016 14:05	AMAR371.9.20160325T140535Z.wav_chan0.xml	0
25/03/2016 14:20	AMAR371.9.20160325T142002Z.wav_chan0.xml	0
25/03/2016 14:34	AMAR371.9.20160325T143429Z.wav_chan0.xml	0
25/03/2016 14:48	AMAR371.9.20160325T144856Z.wav_chan0.xml	0
25/03/2016 15:03	AMAR371.9.20160325T150323Z.wav_chan0.xml	0
25/03/2016 15:17	AMAR371.9.20160325T151750Z.wav_chan0.xml	0
25/03/2016 15:32	AMAR371.9.20160325T153217Z.wav_chan0.xml	0
25/03/2016 15:46	AMAR371.9.20160325T154644Z.wav_chan0.xml	0
25/03/2016 16:01	AMAR371.9.20160325T160111Z.wav_chan0.xml	0
25/03/2016 16:15	AMAR371.9.20160325T161538Z.wav_chan0.xml	0
25/03/2016 16:30	AMAR371.9.20160325T163005Z.wav_chan0.xml	0
25/03/2016 16:44	AMAR371.9.20160325T164432Z.wav_chan0.xml	0
25/03/2016 16:58	AMAR371.9.20160325T165859Z.wav_chan0.xml	0
25/03/2016 17:13	AMAR371.9.20160325T171326Z.wav_chan0.xml	0
25/03/2016 17:27	AMAR371.9.20160325T172753Z.wav_chan0.xml	0
25/03/2016 17:42	AMAR371.9.20160325T174220Z.wav_chan0.xml	0
25/03/2016 17:56	AMAR371.9.20160325T175647Z.wav_chan0.xml	0
25/03/2016 18:11	AMAR371.9.20160325T181114Z.wav_chan0.xml	0
25/03/2016 18:25	AMAR371.9.20160325T182541Z.wav_chan0.xml	0
25/03/2016 18:40	AMAR371.9.20160325T184008Z.wav_chan0.xml	0
25/03/2016 18:54	AMAR371.9.20160325T185435Z.wav_chan0.xml	0
25/03/2016 19:09	AMAR371.9.20160325T190902Z.wav_chan0.xml	0
25/03/2016 19:23	AMAR371.9.20160325T192329Z.wav_chan0.xml	0
25/03/2016 19:37	AMAR371.9.20160325T193756Z.wav_chan0.xml	0
25/03/2016 19:52	AMAR371.9.20160325T195223Z.wav_chan0.xml	0
25/03/2016 20:06	AMAR371.9.20160325T200650Z.wav_chan0.xml	0
25/03/2016 20:21	AMAR371.9.20160325T202117Z.wav_chan0.xml	0
25/03/2016 20:35	AMAR371.9.20160325T203544Z.wav_chan0.xml	0
25/03/2016 20:50	AMAR371.9.20160325T205011Z.wav_chan0.xml	0
25/03/2016 21:04	AMAR371.9.20160325T210438Z.wav_chan0.xml	0
25/03/2016 21:19	AMAR371.9.20160325T211905Z.wav_chan0.xml	0
25/03/2016 21:33	AMAR371.9.20160325T213332Z.wav_chan0.xml	0
25/03/2016 21:47	AMAR371.9.20160325T214759Z.wav_chan0.xml	0
25/03/2016 22:02	AMAR371.9.20160325T220226Z.wav_chan0.xml	0
25/03/2016 22:16	AMAR371.9.20160325T221653Z.wav_chan0.xml	0
25/03/2016 22:31	AMAR371.9.20160325T223120Z.wav_chan0.xml	0
25/03/2016 22:45	AMAR371.9.20160325T224547Z.wav_chan0.xml	0
25/03/2016 23:00	AMAR371.9.20160325T230014Z.wav_chan0.xml	0
25/03/2016 23:14	AMAR371.9.20160325T231441Z.wav_chan0.xml	0
25/03/2016 23:29	AMAR371.9.20160325T232908Z.wav_chan0.xml	0
25/03/2016 23:43	AMAR371.9.20160325T234335Z.wav_chan0.xml	0
25/03/2016 23:58	AMAR371.9.20160325T235802Z.wav_chan0.xml	0
26/03/2016 0:12	AMAR371.9.20160326T001229Z.wav_chan0.xml	0
26/03/2016 0:26	AMAR371.9.20160326T002656Z.wav_chan0.xml	0
26/03/2016 0:41	AMAR371.9.20160326T004123Z.wav_chan0.xml	0
26/03/2016 0:55	AMAR371.9.20160326T005550Z.wav_chan0.xml	0
26/03/2016 1:10	AMAR371.9.20160326T011017Z.wav_chan0.xml	0
26/03/2016 1:24	AMAR371.9.20160326T012444Z.wav_chan0.xml	0
26/03/2016 1:39	AMAR371.9.20160326T013911Z.wav_chan0.xml	0
26/03/2016 1:53	AMAR371.9.20160326T015338Z.wav_chan0.xml	0
26/03/2016 2:08	AMAR371.9.20160326T020805Z.wav_chan0.xml	0
26/03/2016 2:22	AMAR371.9.20160326T022232Z.wav_chan0.xml	0
26/03/2016 2:36	AMAR371.9.20160326T023659Z.wav_chan0.xml	0
26/03/2016 2:51	AMAR371.9.20160326T025126Z.wav_chan0.xml	0
26/03/2016 3:05	AMAR371.9.20160326T030553Z.wav_chan0.xml	0
26/03/2016 3:20	AMAR371.9.20160326T032020Z.wav_chan0.xml	0
26/03/2016 3:34	AMAR371.9.20160326T033447Z.wav_chan0.xml	0
26/03/2016 3:49	AMAR371.9.20160326T034914Z.wav_chan0.xml	0
26/03/2016 4:03	AMAR371.9.20160326T040341Z.wav_chan0.xml	0
26/03/2016 4:18	AMAR371.9.20160326T041808Z.wav_chan0.xml	0
26/03/2016 4:32	AMAR371.9.20160326T043235Z.wav_chan0.xml	0
26/03/2016 4:47	AMAR371.9.20160326T044702Z.wav_chan0.xml	0
26/03/2016 5:01	AMAR371.9.20160326T050129Z.wav_chan0.xml	0
26/03/2016 5:15	AMAR371.9.20160326T051556Z.wav_chan0.xml	0
26/03/2016 5:30	AMAR371.9.20160326T053023Z.wav_chan0.xml	0
26/03/2016 5:44	AMAR371.9.20160326T054450Z.wav_chan0.xml	0
26/03/2016 5:59	AMAR371.9.20160326T055917Z.wav_chan0.xml	0
26/03/2016 6:13	AMAR371.9.20160326T061344Z.wav_chan0.xml	0
26/03/2016 6:28	AMAR371.9.20160326T062811Z.wav_chan0.xml	0
26/03/2016 6:42	AMAR371.9.20160326T064238Z.wav_chan0.xml	0
26/03/2016 6:57	AMAR371.9.20160326T065705Z.wav_chan0.xml	0
26/03/2016 7:11	AMAR371.9.20160326T071132Z.wav_chan0.xml	0
26/03/2016 7:25	AMAR371.9.20160326T072559Z.wav_chan0.xml	0
26/03/2016 7:40	AMAR371.9.20160326T074026Z.wav_chan0.xml	0
26/03/2016 7:54	AMAR371.9.20160326T075453Z.wav_chan0.xml	0
26/03/2016 8:09	AMAR371.9.20160326T080920Z.wav_chan0.xml	0
26/03/2016 8:23	AMAR371.9.20160326T082347Z.wav_chan0.xml	0
26/03/2016 8:38	AMAR371.9.20160326T083814Z.wav_chan0.xml	0
26/03/2016 8:52	AMAR371.9.20160326T085241Z.wav_chan0.xml	0
26/03/2016 9:07	AMAR371.9.20160326T090708Z.wav_chan0.xml	0
26/03/2016 9:21	AMAR371.9.20160326T092135Z.wav_chan0.xml	0
26/03/2016 9:36	AMAR371.9.20160326T093602Z.wav_chan0.xml	0
26/03/2016 9:50	AMAR371.9.20160326T095029Z.wav_chan0.xml	0
26/03/2016 10:04	AMAR371.9.20160326T100456Z.wav_chan0.xml	0
26/03/2016 10:19	AMAR371.9.20160326T101923Z.wav_chan0.xml	0
26/03/2016 10:48	AMAR371.9.20160326T104817Z.wav_chan0.xml	0
26/03/2016 11:02	AMAR371.9.20160326T110244Z.wav_chan0.xml	0
26/03/2016 11:17	AMAR371.9.20160326T111711Z.wav_chan0.xml	0
26/03/2016 11:31	AMAR371.9.20160326T113138Z.wav_chan0.xml	0
26/03/2016 11:46	AMAR371.9.20160326T114605Z.wav_chan0.xml	0
26/03/2016 12:00	AMAR371.9.20160326T120032Z.wav_chan0.xml	0
26/03/2016 12:14	AMAR371.9.20160326T121459Z.wav_chan0.xml	0
26/03/2016 12:29	AMAR371.9.20160326T122926Z.wav_chan0.xml	0
26/03/2016 12:43	AMAR371.9.20160326T124353Z.wav_chan0.xml	0
26/03/2016 12:58	AMAR371.9.20160326T125820Z.wav_chan0.xml	0
26/03/2016 13:12	AMAR371.9.20160326T131247Z.wav_chan0.xml	0
26/03/2016 13:27	AMAR371.9.20160326T132714Z.wav_chan0.xml	0
26/03/2016 13:41	AMAR371.9.20160326T134141Z.wav_chan0.xml	0
26/03/2016 13:56	AMAR371.9.20160326T135608Z.wav_chan0.xml	0
26/03/2016 14:10	AMAR371.9.20160326T141035Z.wav_chan0.xml	0
26/03/2016 14:25	AMAR371.9.20160326T142502Z.wav_chan0.xml	0
26/03/2016 14:39	AMAR371.9.20160326T143929Z.wav_chan0.xml	0
26/03/2016 14:53	AMAR371.9.20160326T145356Z.wav_chan0.xml	0
26/03/2016 15:08	AMAR371.9.20160326T150823Z.wav_chan0.xml	0
26/03/2016 15:22	AMAR371.9.20160326T152250Z.wav_chan0.xml	1
26/03/2016 15:37	AMAR371.9.20160326T153717Z.wav_chan0.xml	0
26/03/2016 15:51	AMAR371.9.20160326T155144Z.wav_chan0.xml	0
26/03/2016 16:06	AMAR371.9.20160326T160611Z.wav_chan0.xml	0
26/03/2016 16:20	AMAR371.9.20160326T162038Z.wav_chan0.xml	0
26/03/2016 16:35	AMAR371.9.20160326T163505Z.wav_chan0.xml	0
26/03/2016 16:49	AMAR371.9.20160326T164932Z.wav_chan0.xml	0
26/03/2016 17:03	AMAR371.9.20160326T170359Z.wav_chan0.xml	0
26/03/2016 17:18	AMAR371.9.20160326T171826Z.wav_chan0.xml	0
26/03/2016 17:32	AMAR371.9.20160326T173253Z.wav_chan0.xml	0
26/03/2016 17:47	AMAR371.9.20160326T174720Z.wav_chan0.xml	0
26/03/2016 18:01	AMAR371.9.20160326T180147Z.wav_chan0.xml	0
26/03/2016 18:16	AMAR371.9.20160326T181614Z.wav_chan0.xml	0
26/03/2016 18:30	AMAR371.9.20160326T183041Z.wav_chan0.xml	0
26/03/2016 18:45	AMAR371.9.20160326T184508Z.wav_chan0.xml	0
26/03/2016 18:59	AMAR371.9.20160326T185935Z.wav_chan0.xml	0
26/03/2016 19:14	AMAR371.9.20160326T191402Z.wav_chan0.xml	0
26/03/2016 19:28	AMAR371.9.20160326T192829Z.wav_chan0.xml	0
26/03/2016 19:42	AMAR371.9.20160326T194256Z.wav_chan0.xml	0
26/03/2016 19:57	AMAR371.9.20160326T195723Z.wav_chan0.xml	0
26/03/2016 20:11	AMAR371.9.20160326T201150Z.wav_chan0.xml	0
26/03/2016 20:26	AMAR371.9.20160326T202617Z.wav_chan0.xml	0
26/03/2016 20:40	AMAR371.9.20160326T204044Z.wav_chan0.xml	0
26/03/2016 20:55	AMAR371.9.20160326T205511Z.wav_chan0.xml	0
26/03/2016 21:09	AMAR371.9.20160326T210938Z.wav_chan0.xml	0
26/03/2016 21:24	AMAR371.9.20160326T212405Z.wav_chan0.xml	0
26/03/2016 21:38	AMAR371.9.20160326T213832Z.wav_chan0.xml	0
26/03/2016 21:52	AMAR371.9.20160326T215259Z.wav_chan0.xml	0
26/03/2016 22:07	AMAR371.9.20160326T220726Z.wav_chan0.xml	0
26/03/2016 22:21	AMAR371.9.20160326T222153Z.wav_chan0.xml	0
26/03/2016 22:36	AMAR371.9.20160326T223620Z.wav_chan0.xml	0
26/03/2016 22:50	AMAR371.9.20160326T225047Z.wav_chan0.xml	0
26/03/2016 23:05	AMAR371.9.20160326T230514Z.wav_chan0.xml	0
26/03/2016 23:19	AMAR371.9.20160326T231941Z.wav_chan0.xml	0
26/03/2016 23:34	AMAR371.9.20160326T233408Z.wav_chan0.xml	0
26/03/2016 23:48	AMAR371.9.20160326T234835Z.wav_chan0.xml	0
27/03/2016 0:03	AMAR371.9.20160327T000302Z.wav_chan0.xml	0
27/03/2016 0:17	AMAR371.9.20160327T001729Z.wav_chan0.xml	0
27/03/2016 0:31	AMAR371.9.20160327T003156Z.wav_chan0.xml	0
27/03/2016 0:46	AMAR371.9.20160327T004623Z.wav_chan0.xml	0
27/03/2016 1:00	AMAR371.9.20160327T010050Z.wav_chan0.xml	0
27/03/2016 1:15	AMAR371.9.20160327T011517Z.wav_chan0.xml	0
27/03/2016 1:29	AMAR371.9.20160327T012944Z.wav_chan0.xml	0
27/03/2016 1:44	AMAR371.9.20160327T014411Z.wav_chan0.xml	0
27/03/2016 1:58	AMAR371.9.20160327T015838Z.wav_chan0.xml	0
27/03/2016 2:13	AMAR371.9.20160327T021305Z.wav_chan0.xml	0
27/03/2016 2:27	AMAR371.9.20160327T022732Z.wav_chan0.xml	0
27/03/2016 2:41	AMAR371.9.20160327T024159Z.wav_chan0.xml	0
27/03/2016 2:56	AMAR371.9.20160327T025626Z.wav_chan0.xml	0
27/03/2016 3:10	AMAR371.9.20160327T031053Z.wav_chan0.xml	0
27/03/2016 3:25	AMAR371.9.20160327T032520Z.wav_chan0.xml	0
27/03/2016 3:39	AMAR371.9.20160327T033947Z.wav_chan0.xml	4
27/03/2016 3:54	AMAR371.9.20160327T035414Z.wav_chan0.xml	0
27/03/2016 4:08	AMAR371.9.20160327T040841Z.wav_chan0.xml	0
27/03/2016 4:23	AMAR371.9.20160327T042308Z.wav_chan0.xml	0
27/03/2016 4:37	AMAR371.9.20160327T043735Z.wav_chan0.xml	0
27/03/2016 4:52	AMAR371.9.20160327T045202Z.wav_chan0.xml	0
27/03/2016 5:06	AMAR371.9.20160327T050629Z.wav_chan0.xml	0
27/03/2016 5:20	AMAR371.9.20160327T052056Z.wav_chan0.xml	0
27/03/2016 5:35	AMAR371.9.20160327T053523Z.wav_chan0.xml	0
27/03/2016 5:49	AMAR371.9.20160327T054950Z.wav_chan0.xml	0
27/03/2016 6:04	AMAR371.9.20160327T060417Z.wav_chan0.xml	0
27/03/2016 6:18	AMAR371.9.20160327T061844Z.wav_chan0.xml	0
27/03/2016 6:33	AMAR371.9.20160327T063311Z.wav_chan0.xml	0
27/03/2016 6:47	AMAR371.9.20160327T064738Z.wav_chan0.xml	0
27/03/2016 7:02	AMAR371.9.20160327T070205Z.wav_chan0.xml	0
27/03/2016 7:16	AMAR371.9.20160327T071632Z.wav_chan0.xml	0
27/03/2016 7:30	AMAR371.9.20160327T073059Z.wav_chan0.xml	0
27/03/2016 7:45	AMAR371.9.20160327T074526Z.wav_chan0.xml	0
27/03/2016 7:59	AMAR371.9.20160327T075953Z.wav_chan0.xml	0
27/03/2016 8:14	AMAR371.9.20160327T081420Z.wav_chan0.xml	0
27/03/2016 8:28	AMAR371.9.20160327T082847Z.wav_chan0.xml	0
27/03/2016 8:43	AMAR371.9.20160327T084314Z.wav_chan0.xml	0
27/03/2016 8:57	AMAR371.9.20160327T085741Z.wav_chan0.xml	0
27/03/2016 9:12	AMAR371.9.20160327T091208Z.wav_chan0.xml	0
27/03/2016 9:26	AMAR371.9.20160327T092635Z.wav_chan0.xml	0
27/03/2016 9:41	AMAR371.9.20160327T094102Z.wav_chan0.xml	0
27/03/2016 9:55	AMAR371.9.20160327T095529Z.wav_chan0.xml	0
27/03/2016 10:09	AMAR371.9.20160327T100956Z.wav_chan0.xml	0
27/03/2016 10:24	AMAR371.9.20160327T102423Z.wav_chan0.xml	0
27/03/2016 10:38	AMAR371.9.20160327T103850Z.wav_chan0.xml	0
27/03/2016 10:53	AMAR371.9.20160327T105317Z.wav_chan0.xml	0
27/03/2016 11:07	AMAR371.9.20160327T110744Z.wav_chan0.xml	0
27/03/2016 11:22	AMAR371.9.20160327T112211Z.wav_chan0.xml	0
27/03/2016 11:36	AMAR371.9.20160327T113638Z.wav_chan0.xml	0
27/03/2016 11:51	AMAR371.9.20160327T115105Z.wav_chan0.xml	0
27/03/2016 12:05	AMAR371.9.20160327T120532Z.wav_chan0.xml	0
27/03/2016 12:19	AMAR371.9.20160327T121959Z.wav_chan0.xml	0
27/03/2016 12:34	AMAR371.9.20160327T123426Z.wav_chan0.xml	0
27/03/2016 12:48	AMAR371.9.20160327T124853Z.wav_chan0.xml	0
27/03/2016 13:03	AMAR371.9.20160327T130320Z.wav_chan0.xml	0
27/03/2016 13:17	AMAR371.9.20160327T131747Z.wav_chan0.xml	0
27/03/2016 13:32	AMAR371.9.20160327T133214Z.wav_chan0.xml	0
27/03/2016 13:46	AMAR371.9.20160327T134641Z.wav_chan0.xml	0
27/03/2016 14:01	AMAR371.9.20160327T140108Z.wav_chan0.xml	0
27/03/2016 14:15	AMAR371.9.20160327T141535Z.wav_chan0.xml	0
27/03/2016 14:30	AMAR371.9.20160327T143002Z.wav_chan0.xml	0
27/03/2016 14:44	AMAR371.9.20160327T144429Z.wav_chan0.xml	0
27/03/2016 14:58	AMAR371.9.20160327T145856Z.wav_chan0.xml	0
27/03/2016 15:13	AMAR371.9.20160327T151323Z.wav_chan0.xml	0
27/03/2016 15:27	AMAR371.9.20160327T152750Z.wav_chan0.xml	0
27/03/2016 15:42	AMAR371.9.20160327T154217Z.wav_chan0.xml	0
27/03/2016 15:56	AMAR371.9.20160327T155644Z.wav_chan0.xml	0
27/03/2016 16:11	AMAR371.9.20160327T161111Z.wav_chan0.xml	0
27/03/2016 16:25	AMAR371.9.20160327T162538Z.wav_chan0.xml	0
27/03/2016 16:40	AMAR371.9.20160327T164005Z.wav_chan0.xml	0
27/03/2016 16:54	AMAR371.9.20160327T165432Z.wav_chan0.xml	0
27/03/2016 17:08	AMAR371.9.20160327T170859Z.wav_chan0.xml	0
27/03/2016 17:23	AMAR371.9.20160327T172326Z.wav_chan0.xml	0
27/03/2016 17:37	AMAR371.9.20160327T173753Z.wav_chan0.xml	0
27/03/2016 17:52	AMAR371.9.20160327T175220Z.wav_chan0.xml	0
27/03/2016 18:06	AMAR371.9.20160327T180647Z.wav_chan0.xml	0
27/03/2016 18:21	AMAR371.9.20160327T182114Z.wav_chan0.xml	0
27/03/2016 18:35	AMAR371.9.20160327T183541Z.wav_chan0.xml	0
27/03/2016 18:50	AMAR371.9.20160327T185008Z.wav_chan0.xml	0
27/03/2016 19:04	AMAR371.9.20160327T190435Z.wav_chan0.xml	0
27/03/2016 19:19	AMAR371.9.20160327T191902Z.wav_chan0.xml	0
27/03/2016 19:33	AMAR371.9.20160327T193329Z.wav_chan0.xml	0
27/03/2016 19:47	AMAR371.9.20160327T194756Z.wav_chan0.xml	0
27/03/2016 20:02	AMAR371.9.20160327T200223Z.wav_chan0.xml	0
27/03/2016 20:16	AMAR371.9.20160327T201650Z.wav_chan0.xml	0
27/03/2016 20:31	AMAR371.9.20160327T203117Z.wav_chan0.xml	0
27/03/2016 20:45	AMAR371.9.20160327T204544Z.wav_chan0.xml	0
27/03/2016 21:00	AMAR371.9.20160327T210011Z.wav_chan0.xml	0
27/03/2016 21:14	AMAR371.9.20160327T211438Z.wav_chan0.xml	0
27/03/2016 21:29	AMAR371.9.20160327T212905Z.wav_chan0.xml	0
27/03/2016 21:43	AMAR371.9.20160327T214332Z.wav_chan0.xml	0
27/03/2016 21:57	AMAR371.9.20160327T215759Z.wav_chan0.xml	0
27/03/2016 22:12	AMAR371.9.20160327T221226Z.wav_chan0.xml	0
27/03/2016 22:26	AMAR371.9.20160327T222653Z.wav_chan0.xml	0
27/03/2016 22:41	AMAR371.9.20160327T224120Z.wav_chan0.xml	0
27/03/2016 22:55	AMAR371.9.20160327T225547Z.wav_chan0.xml	0
27/03/2016 23:10	AMAR371.9.20160327T231014Z.wav_chan0.xml	0
27/03/2016 23:24	AMAR371.9.20160327T232441Z.wav_chan0.xml	0
27/03/2016 23:39	AMAR371.9.20160327T233908Z.wav_chan0.xml	0
27/03/2016 23:53	AMAR371.9.20160327T235335Z.wav_chan0.xml	0
28/03/2016 0:08	AMAR371.9.20160328T000802Z.wav_chan0.xml	0
28/03/2016 0:22	AMAR371.9.20160328T002229Z.wav_chan0.xml	0
28/03/2016 0:36	AMAR371.9.20160328T003656Z.wav_chan0.xml	0
28/03/2016 0:51	AMAR371.9.20160328T005123Z.wav_chan0.xml	0
28/03/2016 1:05	AMAR371.9.20160328T010550Z.wav_chan0.xml	0
28/03/2016 1:20	AMAR371.9.20160328T012017Z.wav_chan0.xml	0
28/03/2016 1:34	AMAR371.9.20160328T013444Z.wav_chan0.xml	0
28/03/2016 1:49	AMAR371.9.20160328T014911Z.wav_chan0.xml	0
28/03/2016 2:03	AMAR371.9.20160328T020338Z.wav_chan0.xml	0
28/03/2016 2:18	AMAR371.9.20160328T021805Z.wav_chan0.xml	0
28/03/2016 2:32	AMAR371.9.20160328T023232Z.wav_chan0.xml	0
28/03/2016 2:46	AMAR371.9.20160328T024659Z.wav_chan0.xml	0
28/03/2016 3:01	AMAR371.9.20160328T030126Z.wav_chan0.xml	0
28/03/2016 3:15	AMAR371.9.20160328T031553Z.wav_chan0.xml	0
28/03/2016 3:30	AMAR371.9.20160328T033020Z.wav_chan0.xml	0
28/03/2016 3:44	AMAR371.9.20160328T034447Z.wav_chan0.xml	0
28/03/2016 3:59	AMAR371.9.20160328T035914Z.wav_chan0.xml	0
28/03/2016 4:13	AMAR371.9.20160328T041341Z.wav_chan0.xml	0
28/03/2016 4:28	AMAR371.9.20160328T042808Z.wav_chan0.xml	0
28/03/2016 4:42	AMAR371.9.20160328T044235Z.wav_chan0.xml	0
28/03/2016 4:57	AMAR371.9.20160328T045702Z.wav_chan0.xml	0
28/03/2016 5:11	AMAR371.9.20160328T051129Z.wav_chan0.xml	0
28/03/2016 5:25	AMAR371.9.20160328T052556Z.wav_chan0.xml	0
28/03/2016 5:40	AMAR371.9.20160328T054023Z.wav_chan0.xml	0
28/03/2016 5:54	AMAR371.9.20160328T055450Z.wav_chan0.xml	1
28/03/2016 6:09	AMAR371.9.20160328T060917Z.wav_chan0.xml	0
28/03/2016 6:23	AMAR371.9.20160328T062344Z.wav_chan0.xml	0
28/03/2016 6:38	AMAR371.9.20160328T063811Z.wav_chan0.xml	0
28/03/2016 6:52	AMAR371.9.20160328T065238Z.wav_chan0.xml	0
28/03/2016 7:07	AMAR371.9.20160328T070705Z.wav_chan0.xml	0
28/03/2016 7:21	AMAR371.9.20160328T072132Z.wav_chan0.xml	0
28/03/2016 7:35	AMAR371.9.20160328T073559Z.wav_chan0.xml	0
28/03/2016 7:50	AMAR371.9.20160328T075026Z.wav_chan0.xml	0
28/03/2016 8:04	AMAR371.9.20160328T080453Z.wav_chan0.xml	0
28/03/2016 8:19	AMAR371.9.20160328T081920Z.wav_chan0.xml	0
28/03/2016 8:33	AMAR371.9.20160328T083347Z.wav_chan0.xml	0
28/03/2016 8:48	AMAR371.9.20160328T084814Z.wav_chan0.xml	0
28/03/2016 9:02	AMAR371.9.20160328T090241Z.wav_chan0.xml	0
28/03/2016 9:17	AMAR371.9.20160328T091708Z.wav_chan0.xml	0
28/03/2016 9:31	AMAR371.9.20160328T093135Z.wav_chan0.xml	0
28/03/2016 9:46	AMAR371.9.20160328T094602Z.wav_chan0.xml	0
28/03/2016 10:00	AMAR371.9.20160328T100029Z.wav_chan0.xml	0
28/03/2016 10:14	AMAR371.9.20160328T101456Z.wav_chan0.xml	2
28/03/2016 10:29	AMAR371.9.20160328T102923Z.wav_chan0.xml	0
28/03/2016 10:43	AMAR371.9.20160328T104350Z.wav_chan0.xml	0
28/03/2016 10:58	AMAR371.9.20160328T105817Z.wav_chan0.xml	0
28/03/2016 11:12	AMAR371.9.20160328T111244Z.wav_chan0.xml	0
28/03/2016 11:27	AMAR371.9.20160328T112711Z.wav_chan0.xml	0
28/03/2016 11:41	AMAR371.9.20160328T114138Z.wav_chan0.xml	0
28/03/2016 11:56	AMAR371.9.20160328T115605Z.wav_chan0.xml	0
28/03/2016 12:10	AMAR371.9.20160328T121032Z.wav_chan0.xml	0
28/03/2016 12:24	AMAR371.9.20160328T122459Z.wav_chan0.xml	0
28/03/2016 12:39	AMAR371.9.20160328T123926Z.wav_chan0.xml	0
28/03/2016 12:53	AMAR371.9.20160328T125353Z.wav_chan0.xml	0
28/03/2016 13:08	AMAR371.9.20160328T130820Z.wav_chan0.xml	0
28/03/2016 13:22	AMAR371.9.20160328T132247Z.wav_chan0.xml	0
28/03/2016 13:37	AMAR371.9.20160328T133714Z.wav_chan0.xml	0
28/03/2016 13:51	AMAR371.9.20160328T135141Z.wav_chan0.xml	0
28/03/2016 14:06	AMAR371.9.20160328T140608Z.wav_chan0.xml	0
28/03/2016 14:20	AMAR371.9.20160328T142035Z.wav_chan0.xml	0
28/03/2016 14:35	AMAR371.9.20160328T143502Z.wav_chan0.xml	0
28/03/2016 14:49	AMAR371.9.20160328T144929Z.wav_chan0.xml	0
28/03/2016 15:03	AMAR371.9.20160328T150356Z.wav_chan0.xml	0
28/03/2016 15:18	AMAR371.9.20160328T151823Z.wav_chan0.xml	0
28/03/2016 15:32	AMAR371.9.20160328T153250Z.wav_chan0.xml	0
28/03/2016 15:47	AMAR371.9.20160328T154717Z.wav_chan0.xml	0
28/03/2016 16:01	AMAR371.9.20160328T160144Z.wav_chan0.xml	0
28/03/2016 16:16	AMAR371.9.20160328T161611Z.wav_chan0.xml	0
28/03/2016 16:30	AMAR371.9.20160328T163038Z.wav_chan0.xml	0
28/03/2016 16:45	AMAR371.9.20160328T164505Z.wav_chan0.xml	0
28/03/2016 16:59	AMAR371.9.20160328T165932Z.wav_chan0.xml	0
28/03/2016 17:13	AMAR371.9.20160328T171359Z.wav_chan0.xml	0
28/03/2016 17:28	AMAR371.9.20160328T172826Z.wav_chan0.xml	0
28/03/2016 17:42	AMAR371.9.20160328T174253Z.wav_chan0.xml	0
28/03/2016 17:57	AMAR371.9.20160328T175720Z.wav_chan0.xml	0
28/03/2016 18:11	AMAR371.9.20160328T181147Z.wav_chan0.xml	0
28/03/2016 18:26	AMAR371.9.20160328T182614Z.wav_chan0.xml	0
28/03/2016 18:40	AMAR371.9.20160328T184041Z.wav_chan0.xml	0
28/03/2016 18:55	AMAR371.9.20160328T185508Z.wav_chan0.xml	0
28/03/2016 19:09	AMAR371.9.20160328T190935Z.wav_chan0.xml	4
28/03/2016 19:24	AMAR371.9.20160328T192402Z.wav_chan0.xml	0
28/03/2016 19:38	AMAR371.9.20160328T193829Z.wav_chan0.xml	0
28/03/2016 19:52	AMAR371.9.20160328T195256Z.wav_chan0.xml	0
28/03/2016 20:07	AMAR371.9.20160328T200723Z.wav_chan0.xml	0
28/03/2016 20:21	AMAR371.9.20160328T202150Z.wav_chan0.xml	0
28/03/2016 20:36	AMAR371.9.20160328T203617Z.wav_chan0.xml	0
28/03/2016 20:50	AMAR371.9.20160328T205044Z.wav_chan0.xml	0
28/03/2016 21:05	AMAR371.9.20160328T210511Z.wav_chan0.xml	0
28/03/2016 21:19	AMAR371.9.20160328T211938Z.wav_chan0.xml	0
28/03/2016 21:34	AMAR371.9.20160328T213405Z.wav_chan0.xml	0
28/03/2016 21:48	AMAR371.9.20160328T214832Z.wav_chan0.xml	0
28/03/2016 22:02	AMAR371.9.20160328T220259Z.wav_chan0.xml	0
28/03/2016 22:17	AMAR371.9.20160328T221726Z.wav_chan0.xml	0
28/03/2016 22:31	AMAR371.9.20160328T223153Z.wav_chan0.xml	0
28/03/2016 23:00	AMAR371.9.20160328T230047Z.wav_chan0.xml	0
28/03/2016 23:15	AMAR371.9.20160328T231514Z.wav_chan0.xml	0
28/03/2016 23:29	AMAR371.9.20160328T232941Z.wav_chan0.xml	0
28/03/2016 23:44	AMAR371.9.20160328T234408Z.wav_chan0.xml	0
28/03/2016 23:58	AMAR371.9.20160328T235835Z.wav_chan0.xml	0
29/03/2016 0:13	AMAR371.9.20160329T001302Z.wav_chan0.xml	0
29/03/2016 0:27	AMAR371.9.20160329T002729Z.wav_chan0.xml	0
29/03/2016 0:41	AMAR371.9.20160329T004156Z.wav_chan0.xml	0
29/03/2016 0:56	AMAR371.9.20160329T005623Z.wav_chan0.xml	0
29/03/2016 1:10	AMAR371.9.20160329T011050Z.wav_chan0.xml	0
29/03/2016 1:25	AMAR371.9.20160329T012517Z.wav_chan0.xml	0
29/03/2016 1:39	AMAR371.9.20160329T013944Z.wav_chan0.xml	0
29/03/2016 1:54	AMAR371.9.20160329T015411Z.wav_chan0.xml	0
29/03/2016 2:08	AMAR371.9.20160329T020838Z.wav_chan0.xml	0
29/03/2016 2:23	AMAR371.9.20160329T022305Z.wav_chan0.xml	0
29/03/2016 2:37	AMAR371.9.20160329T023732Z.wav_chan0.xml	0
29/03/2016 2:51	AMAR371.9.20160329T025159Z.wav_chan0.xml	0
29/03/2016 3:06	AMAR371.9.20160329T030626Z.wav_chan0.xml	0
29/03/2016 3:20	AMAR371.9.20160329T032053Z.wav_chan0.xml	0
29/03/2016 3:35	AMAR371.9.20160329T033520Z.wav_chan0.xml	0
29/03/2016 3:49	AMAR371.9.20160329T034947Z.wav_chan0.xml	0
29/03/2016 4:04	AMAR371.9.20160329T040414Z.wav_chan0.xml	0
29/03/2016 4:18	AMAR371.9.20160329T041841Z.wav_chan0.xml	0
29/03/2016 4:33	AMAR371.9.20160329T043308Z.wav_chan0.xml	0
29/03/2016 4:47	AMAR371.9.20160329T044735Z.wav_chan0.xml	0
29/03/2016 5:02	AMAR371.9.20160329T050202Z.wav_chan0.xml	0
29/03/2016 5:16	AMAR371.9.20160329T051629Z.wav_chan0.xml	0
29/03/2016 5:30	AMAR371.9.20160329T053056Z.wav_chan0.xml	0
29/03/2016 5:45	AMAR371.9.20160329T054523Z.wav_chan0.xml	0
29/03/2016 5:59	AMAR371.9.20160329T055950Z.wav_chan0.xml	0
29/03/2016 6:14	AMAR371.9.20160329T061417Z.wav_chan0.xml	0
29/03/2016 6:28	AMAR371.9.20160329T062844Z.wav_chan0.xml	0
29/03/2016 6:43	AMAR371.9.20160329T064311Z.wav_chan0.xml	0
29/03/2016 6:57	AMAR371.9.20160329T065738Z.wav_chan0.xml	0
29/03/2016 7:12	AMAR371.9.20160329T071205Z.wav_chan0.xml	0
29/03/2016 7:26	AMAR371.9.20160329T072632Z.wav_chan0.xml	0
29/03/2016 7:40	AMAR371.9.20160329T074059Z.wav_chan0.xml	0
29/03/2016 7:55	AMAR371.9.20160329T075526Z.wav_chan0.xml	0
29/03/2016 8:09	AMAR371.9.20160329T080953Z.wav_chan0.xml	0
29/03/2016 8:24	AMAR371.9.20160329T082420Z.wav_chan0.xml	0
29/03/2016 8:38	AMAR371.9.20160329T083847Z.wav_chan0.xml	0
29/03/2016 8:53	AMAR371.9.20160329T085314Z.wav_chan0.xml	0
29/03/2016 9:07	AMAR371.9.20160329T090741Z.wav_chan0.xml	0
29/03/2016 9:22	AMAR371.9.20160329T092208Z.wav_chan0.xml	0
29/03/2016 9:36	AMAR371.9.20160329T093635Z.wav_chan0.xml	0
29/03/2016 9:51	AMAR371.9.20160329T095102Z.wav_chan0.xml	0
29/03/2016 10:05	AMAR371.9.20160329T100529Z.wav_chan0.xml	0
29/03/2016 10:19	AMAR371.9.20160329T101956Z.wav_chan0.xml	0
29/03/2016 10:34	AMAR371.9.20160329T103423Z.wav_chan0.xml	0
29/03/2016 10:48	AMAR371.9.20160329T104850Z.wav_chan0.xml	0
29/03/2016 11:03	AMAR371.9.20160329T110317Z.wav_chan0.xml	0
29/03/2016 11:17	AMAR371.9.20160329T111744Z.wav_chan0.xml	0
29/03/2016 11:32	AMAR371.9.20160329T113211Z.wav_chan0.xml	0
29/03/2016 11:46	AMAR371.9.20160329T114638Z.wav_chan0.xml	0
29/03/2016 12:01	AMAR371.9.20160329T120105Z.wav_chan0.xml	0
29/03/2016 12:15	AMAR371.9.20160329T121532Z.wav_chan0.xml	0
29/03/2016 12:29	AMAR371.9.20160329T122959Z.wav_chan0.xml	0
29/03/2016 12:44	AMAR371.9.20160329T124426Z.wav_chan0.xml	0
29/03/2016 12:58	AMAR371.9.20160329T125853Z.wav_chan0.xml	0
29/03/2016 13:13	AMAR371.9.20160329T131320Z.wav_chan0.xml	0
29/03/2016 13:27	AMAR371.9.20160329T132747Z.wav_chan0.xml	0
29/03/2016 13:42	AMAR371.9.20160329T134214Z.wav_chan0.xml	0
29/03/2016 13:56	AMAR371.9.20160329T135641Z.wav_chan0.xml	0
29/03/2016 14:11	AMAR371.9.20160329T141108Z.wav_chan0.xml	0
29/03/2016 14:25	AMAR371.9.20160329T142535Z.wav_chan0.xml	0
29/03/2016 14:40	AMAR371.9.20160329T144002Z.wav_chan0.xml	0
29/03/2016 14:54	AMAR371.9.20160329T145429Z.wav_chan0.xml	0
29/03/2016 15:08	AMAR371.9.20160329T150856Z.wav_chan0.xml	0
29/03/2016 15:23	AMAR371.9.20160329T152323Z.wav_chan0.xml	0
29/03/2016 15:37	AMAR371.9.20160329T153750Z.wav_chan0.xml	0
29/03/2016 15:52	AMAR371.9.20160329T155217Z.wav_chan0.xml	0
29/03/2016 16:06	AMAR371.9.20160329T160644Z.wav_chan0.xml	0
29/03/2016 16:21	AMAR371.9.20160329T162111Z.wav_chan0.xml	0
29/03/2016 16:35	AMAR371.9.20160329T163538Z.wav_chan0.xml	0
29/03/2016 16:50	AMAR371.9.20160329T165005Z.wav_chan0.xml	0
29/03/2016 17:04	AMAR371.9.20160329T170432Z.wav_chan0.xml	0
29/03/2016 17:18	AMAR371.9.20160329T171859Z.wav_chan0.xml	0
29/03/2016 17:33	AMAR371.9.20160329T173326Z.wav_chan0.xml	0
29/03/2016 17:47	AMAR371.9.20160329T174753Z.wav_chan0.xml	0
29/03/2016 18:02	AMAR371.9.20160329T180220Z.wav_chan0.xml	0
29/03/2016 18:16	AMAR371.9.20160329T181647Z.wav_chan0.xml	0
29/03/2016 18:31	AMAR371.9.20160329T183114Z.wav_chan0.xml	0
29/03/2016 18:45	AMAR371.9.20160329T184541Z.wav_chan0.xml	0
29/03/2016 19:00	AMAR371.9.20160329T190008Z.wav_chan0.xml	0
29/03/2016 19:14	AMAR371.9.20160329T191435Z.wav_chan0.xml	0
29/03/2016 19:29	AMAR371.9.20160329T192902Z.wav_chan0.xml	0
29/03/2016 19:43	AMAR371.9.20160329T194329Z.wav_chan0.xml	0
29/03/2016 19:57	AMAR371.9.20160329T195756Z.wav_chan0.xml	0
29/03/2016 20:12	AMAR371.9.20160329T201223Z.wav_chan0.xml	0
29/03/2016 20:26	AMAR371.9.20160329T202650Z.wav_chan0.xml	0
29/03/2016 20:41	AMAR371.9.20160329T204117Z.wav_chan0.xml	0
29/03/2016 20:55	AMAR371.9.20160329T205544Z.wav_chan0.xml	0
29/03/2016 21:10	AMAR371.9.20160329T211011Z.wav_chan0.xml	0
29/03/2016 21:24	AMAR371.9.20160329T212438Z.wav_chan0.xml	0
29/03/2016 21:39	AMAR371.9.20160329T213905Z.wav_chan0.xml	0
29/03/2016 21:53	AMAR371.9.20160329T215332Z.wav_chan0.xml	0
29/03/2016 22:07	AMAR371.9.20160329T220759Z.wav_chan0.xml	0
29/03/2016 22:22	AMAR371.9.20160329T222226Z.wav_chan0.xml	0
29/03/2016 22:36	AMAR371.9.20160329T223653Z.wav_chan0.xml	0
29/03/2016 22:51	AMAR371.9.20160329T225120Z.wav_chan0.xml	0
29/03/2016 23:05	AMAR371.9.20160329T230547Z.wav_chan0.xml	0
29/03/2016 23:20	AMAR371.9.20160329T232014Z.wav_chan0.xml	0
29/03/2016 23:34	AMAR371.9.20160329T233441Z.wav_chan0.xml	0
29/03/2016 23:49	AMAR371.9.20160329T234908Z.wav_chan0.xml	7
30/03/2016 0:03	AMAR371.9.20160330T000335Z.wav_chan0.xml	0
30/03/2016 0:18	AMAR371.9.20160330T001802Z.wav_chan0.xml	0
30/03/2016 0:32	AMAR371.9.20160330T003229Z.wav_chan0.xml	0
30/03/2016 0:46	AMAR371.9.20160330T004656Z.wav_chan0.xml	0
30/03/2016 1:01	AMAR371.9.20160330T010123Z.wav_chan0.xml	0
30/03/2016 1:15	AMAR371.9.20160330T011550Z.wav_chan0.xml	0
30/03/2016 1:30	AMAR371.9.20160330T013017Z.wav_chan0.xml	0
30/03/2016 1:44	AMAR371.9.20160330T014444Z.wav_chan0.xml	0
30/03/2016 1:59	AMAR371.9.20160330T015911Z.wav_chan0.xml	0
30/03/2016 2:13	AMAR371.9.20160330T021338Z.wav_chan0.xml	0
30/03/2016 2:28	AMAR371.9.20160330T022805Z.wav_chan0.xml	0
30/03/2016 2:42	AMAR371.9.20160330T024232Z.wav_chan0.xml	0
30/03/2016 2:56	AMAR371.9.20160330T025659Z.wav_chan0.xml	0
30/03/2016 3:11	AMAR371.9.20160330T031126Z.wav_chan0.xml	0
30/03/2016 3:25	AMAR371.9.20160330T032553Z.wav_chan0.xml	0
30/03/2016 3:40	AMAR371.9.20160330T034020Z.wav_chan0.xml	0
30/03/2016 3:54	AMAR371.9.20160330T035447Z.wav_chan0.xml	0
30/03/2016 4:09	AMAR371.9.20160330T040914Z.wav_chan0.xml	5
30/03/2016 4:23	AMAR371.9.20160330T042341Z.wav_chan0.xml	0
30/03/2016 4:38	AMAR371.9.20160330T043808Z.wav_chan0.xml	0
30/03/2016 4:52	AMAR371.9.20160330T045235Z.wav_chan0.xml	0
30/03/2016 5:07	AMAR371.9.20160330T050702Z.wav_chan0.xml	0
30/03/2016 5:21	AMAR371.9.20160330T052129Z.wav_chan0.xml	0
30/03/2016 5:35	AMAR371.9.20160330T053556Z.wav_chan0.xml	0
30/03/2016 5:50	AMAR371.9.20160330T055023Z.wav_chan0.xml	0
30/03/2016 6:04	AMAR371.9.20160330T060450Z.wav_chan0.xml	0
30/03/2016 6:19	AMAR371.9.20160330T061917Z.wav_chan0.xml	0
30/03/2016 6:33	AMAR371.9.20160330T063344Z.wav_chan0.xml	0
30/03/2016 6:48	AMAR371.9.20160330T064811Z.wav_chan0.xml	0
30/03/2016 7:02	AMAR371.9.20160330T070238Z.wav_chan0.xml	0
30/03/2016 7:17	AMAR371.9.20160330T071705Z.wav_chan0.xml	0
30/03/2016 7:31	AMAR371.9.20160330T073132Z.wav_chan0.xml	0
30/03/2016 7:45	AMAR371.9.20160330T074559Z.wav_chan0.xml	0
30/03/2016 8:00	AMAR371.9.20160330T080026Z.wav_chan0.xml	0
30/03/2016 8:14	AMAR371.9.20160330T081453Z.wav_chan0.xml	0
30/03/2016 8:29	AMAR371.9.20160330T082920Z.wav_chan0.xml	0
30/03/2016 8:43	AMAR371.9.20160330T084347Z.wav_chan0.xml	1
30/03/2016 8:58	AMAR371.9.20160330T085814Z.wav_chan0.xml	0
30/03/2016 9:12	AMAR371.9.20160330T091241Z.wav_chan0.xml	0
30/03/2016 9:27	AMAR371.9.20160330T092708Z.wav_chan0.xml	0
30/03/2016 9:41	AMAR371.9.20160330T094135Z.wav_chan0.xml	0
30/03/2016 9:56	AMAR371.9.20160330T095602Z.wav_chan0.xml	0
30/03/2016 10:10	AMAR371.9.20160330T101029Z.wav_chan0.xml	0
30/03/2016 10:24	AMAR371.9.20160330T102456Z.wav_chan0.xml	0
30/03/2016 10:39	AMAR371.9.20160330T103923Z.wav_chan0.xml	0
30/03/2016 10:53	AMAR371.9.20160330T105350Z.wav_chan0.xml	0
30/03/2016 11:08	AMAR371.9.20160330T110817Z.wav_chan0.xml	0
30/03/2016 11:22	AMAR371.9.20160330T112244Z.wav_chan0.xml	2
30/03/2016 11:37	AMAR371.9.20160330T113711Z.wav_chan0.xml	0
30/03/2016 11:51	AMAR371.9.20160330T115138Z.wav_chan0.xml	0
30/03/2016 12:06	AMAR371.9.20160330T120605Z.wav_chan0.xml	0
30/03/2016 12:20	AMAR371.9.20160330T122032Z.wav_chan0.xml	0
30/03/2016 12:34	AMAR371.9.20160330T123459Z.wav_chan0.xml	0
30/03/2016 12:49	AMAR371.9.20160330T124926Z.wav_chan0.xml	0
30/03/2016 13:03	AMAR371.9.20160330T130353Z.wav_chan0.xml	0
30/03/2016 13:18	AMAR371.9.20160330T131820Z.wav_chan0.xml	0
30/03/2016 13:32	AMAR371.9.20160330T133247Z.wav_chan0.xml	0
30/03/2016 13:47	AMAR371.9.20160330T134714Z.wav_chan0.xml	0
30/03/2016 14:01	AMAR371.9.20160330T140141Z.wav_chan0.xml	0
30/03/2016 14:16	AMAR371.9.20160330T141608Z.wav_chan0.xml	0
30/03/2016 14:30	AMAR371.9.20160330T143035Z.wav_chan0.xml	0
30/03/2016 14:45	AMAR371.9.20160330T144502Z.wav_chan0.xml	0
30/03/2016 14:59	AMAR371.9.20160330T145929Z.wav_chan0.xml	0
30/03/2016 15:13	AMAR371.9.20160330T151356Z.wav_chan0.xml	0
30/03/2016 15:28	AMAR371.9.20160330T152823Z.wav_chan0.xml	0
30/03/2016 15:42	AMAR371.9.20160330T154250Z.wav_chan0.xml	0
30/03/2016 15:57	AMAR371.9.20160330T155717Z.wav_chan0.xml	0
30/03/2016 16:11	AMAR371.9.20160330T161144Z.wav_chan0.xml	0
30/03/2016 16:26	AMAR371.9.20160330T162611Z.wav_chan0.xml	0
30/03/2016 16:40	AMAR371.9.20160330T164038Z.wav_chan0.xml	0
30/03/2016 16:55	AMAR371.9.20160330T165505Z.wav_chan0.xml	0
30/03/2016 17:09	AMAR371.9.20160330T170932Z.wav_chan0.xml	0
30/03/2016 17:23	AMAR371.9.20160330T172359Z.wav_chan0.xml	0
30/03/2016 17:38	AMAR371.9.20160330T173826Z.wav_chan0.xml	0
30/03/2016 17:52	AMAR371.9.20160330T175253Z.wav_chan0.xml	0
30/03/2016 18:07	AMAR371.9.20160330T180720Z.wav_chan0.xml	0
30/03/2016 18:21	AMAR371.9.20160330T182147Z.wav_chan0.xml	0
30/03/2016 18:36	AMAR371.9.20160330T183614Z.wav_chan0.xml	0
30/03/2016 18:50	AMAR371.9.20160330T185041Z.wav_chan0.xml	0
30/03/2016 19:05	AMAR371.9.20160330T190508Z.wav_chan0.xml	0
30/03/2016 19:19	AMAR371.9.20160330T191935Z.wav_chan0.xml	0
30/03/2016 19:34	AMAR371.9.20160330T193402Z.wav_chan0.xml	0
30/03/2016 19:48	AMAR371.9.20160330T194829Z.wav_chan0.xml	0
30/03/2016 20:02	AMAR371.9.20160330T200256Z.wav_chan0.xml	0
30/03/2016 20:17	AMAR371.9.20160330T201723Z.wav_chan0.xml	0
30/03/2016 20:31	AMAR371.9.20160330T203150Z.wav_chan0.xml	0
30/03/2016 20:46	AMAR371.9.20160330T204617Z.wav_chan0.xml	0
30/03/2016 21:00	AMAR371.9.20160330T210044Z.wav_chan0.xml	0
30/03/2016 21:15	AMAR371.9.20160330T211511Z.wav_chan0.xml	0
30/03/2016 21:29	AMAR371.9.20160330T212938Z.wav_chan0.xml	0
30/03/2016 21:44	AMAR371.9.20160330T214405Z.wav_chan0.xml	0
30/03/2016 21:58	AMAR371.9.20160330T215832Z.wav_chan0.xml	0
30/03/2016 22:12	AMAR371.9.20160330T221259Z.wav_chan0.xml	0
30/03/2016 22:41	AMAR371.9.20160330T224153Z.wav_chan0.xml	0
30/03/2016 22:56	AMAR371.9.20160330T225620Z.wav_chan0.xml	0
30/03/2016 23:10	AMAR371.9.20160330T231047Z.wav_chan0.xml	0
30/03/2016 23:25	AMAR371.9.20160330T232514Z.wav_chan0.xml	0
30/03/2016 23:39	AMAR371.9.20160330T233941Z.wav_chan0.xml	0
30/03/2016 23:54	AMAR371.9.20160330T235408Z.wav_chan0.xml	0
31/03/2016 0:08	AMAR371.9.20160331T000835Z.wav_chan0.xml	0
31/03/2016 0:23	AMAR371.9.20160331T002302Z.wav_chan0.xml	0
31/03/2016 0:37	AMAR371.9.20160331T003729Z.wav_chan0.xml	1
31/03/2016 0:51	AMAR371.9.20160331T005156Z.wav_chan0.xml	0
31/03/2016 1:06	AMAR371.9.20160331T010623Z.wav_chan0.xml	0
31/03/2016 1:20	AMAR371.9.20160331T012050Z.wav_chan0.xml	0
31/03/2016 1:35	AMAR371.9.20160331T013517Z.wav_chan0.xml	0
31/03/2016 1:49	AMAR371.9.20160331T014944Z.wav_chan0.xml	0
31/03/2016 2:04	AMAR371.9.20160331T020411Z.wav_chan0.xml	0
31/03/2016 2:18	AMAR371.9.20160331T021838Z.wav_chan0.xml	0
31/03/2016 2:33	AMAR371.9.20160331T023305Z.wav_chan0.xml	0
31/03/2016 2:47	AMAR371.9.20160331T024732Z.wav_chan0.xml	0
31/03/2016 3:01	AMAR371.9.20160331T030159Z.wav_chan0.xml	0
31/03/2016 3:16	AMAR371.9.20160331T031626Z.wav_chan0.xml	0
31/03/2016 3:30	AMAR371.9.20160331T033053Z.wav_chan0.xml	0
31/03/2016 3:45	AMAR371.9.20160331T034520Z.wav_chan0.xml	0
31/03/2016 3:59	AMAR371.9.20160331T035947Z.wav_chan0.xml	0
31/03/2016 4:14	AMAR371.9.20160331T041414Z.wav_chan0.xml	0
31/03/2016 4:28	AMAR371.9.20160331T042841Z.wav_chan0.xml	0
31/03/2016 4:43	AMAR371.9.20160331T044308Z.wav_chan0.xml	0
31/03/2016 4:57	AMAR371.9.20160331T045735Z.wav_chan0.xml	0
31/03/2016 5:12	AMAR371.9.20160331T051202Z.wav_chan0.xml	0
31/03/2016 5:26	AMAR371.9.20160331T052629Z.wav_chan0.xml	0
31/03/2016 5:40	AMAR371.9.20160331T054056Z.wav_chan0.xml	0
31/03/2016 5:55	AMAR371.9.20160331T055523Z.wav_chan0.xml	0
31/03/2016 6:09	AMAR371.9.20160331T060950Z.wav_chan0.xml	0
31/03/2016 6:24	AMAR371.9.20160331T062417Z.wav_chan0.xml	0
31/03/2016 6:38	AMAR371.9.20160331T063844Z.wav_chan0.xml	0
31/03/2016 6:53	AMAR371.9.20160331T065311Z.wav_chan0.xml	0
31/03/2016 7:07	AMAR371.9.20160331T070738Z.wav_chan0.xml	0
31/03/2016 7:22	AMAR371.9.20160331T072205Z.wav_chan0.xml	0
31/03/2016 7:36	AMAR371.9.20160331T073632Z.wav_chan0.xml	0
31/03/2016 7:50	AMAR371.9.20160331T075059Z.wav_chan0.xml	0
31/03/2016 8:05	AMAR371.9.20160331T080526Z.wav_chan0.xml	0
31/03/2016 8:19	AMAR371.9.20160331T081953Z.wav_chan0.xml	0
31/03/2016 8:34	AMAR371.9.20160331T083420Z.wav_chan0.xml	0
31/03/2016 8:48	AMAR371.9.20160331T084847Z.wav_chan0.xml	0
31/03/2016 9:03	AMAR371.9.20160331T090314Z.wav_chan0.xml	0
31/03/2016 9:17	AMAR371.9.20160331T091741Z.wav_chan0.xml	0
31/03/2016 9:32	AMAR371.9.20160331T093208Z.wav_chan0.xml	0
31/03/2016 9:46	AMAR371.9.20160331T094635Z.wav_chan0.xml	0
31/03/2016 10:01	AMAR371.9.20160331T100102Z.wav_chan0.xml	0
31/03/2016 10:15	AMAR371.9.20160331T101529Z.wav_chan0.xml	0
31/03/2016 10:29	AMAR371.9.20160331T102956Z.wav_chan0.xml	0
31/03/2016 10:44	AMAR371.9.20160331T104423Z.wav_chan0.xml	0
31/03/2016 10:58	AMAR371.9.20160331T105850Z.wav_chan0.xml	3
31/03/2016 11:13	AMAR371.9.20160331T111317Z.wav_chan0.xml	0
31/03/2016 11:27	AMAR371.9.20160331T112744Z.wav_chan0.xml	0
31/03/2016 11:42	AMAR371.9.20160331T114211Z.wav_chan0.xml	0
31/03/2016 11:56	AMAR371.9.20160331T115638Z.wav_chan0.xml	0
31/03/2016 12:11	AMAR371.9.20160331T121105Z.wav_chan0.xml	0
31/03/2016 12:25	AMAR371.9.20160331T122532Z.wav_chan0.xml	0
31/03/2016 12:39	AMAR371.9.20160331T123959Z.wav_chan0.xml	0
31/03/2016 12:54	AMAR371.9.20160331T125426Z.wav_chan0.xml	0
31/03/2016 13:08	AMAR371.9.20160331T130853Z.wav_chan0.xml	0
31/03/2016 13:23	AMAR371.9.20160331T132320Z.wav_chan0.xml	0
31/03/2016 13:37	AMAR371.9.20160331T133747Z.wav_chan0.xml	0
31/03/2016 13:52	AMAR371.9.20160331T135214Z.wav_chan0.xml	0
31/03/2016 14:06	AMAR371.9.20160331T140641Z.wav_chan0.xml	0
31/03/2016 14:21	AMAR371.9.20160331T142108Z.wav_chan0.xml	0
31/03/2016 14:35	AMAR371.9.20160331T143535Z.wav_chan0.xml	0
31/03/2016 14:50	AMAR371.9.20160331T145002Z.wav_chan0.xml	0
31/03/2016 15:04	AMAR371.9.20160331T150429Z.wav_chan0.xml	0
31/03/2016 15:18	AMAR371.9.20160331T151856Z.wav_chan0.xml	0
31/03/2016 15:33	AMAR371.9.20160331T153323Z.wav_chan0.xml	0
31/03/2016 15:47	AMAR371.9.20160331T154750Z.wav_chan0.xml	0
31/03/2016 16:02	AMAR371.9.20160331T160217Z.wav_chan0.xml	0
31/03/2016 16:16	AMAR371.9.20160331T161644Z.wav_chan0.xml	0
31/03/2016 16:31	AMAR371.9.20160331T163111Z.wav_chan0.xml	0
31/03/2016 16:45	AMAR371.9.20160331T164538Z.wav_chan0.xml	0
31/03/2016 17:00	AMAR371.9.20160331T170005Z.wav_chan0.xml	0
31/03/2016 17:14	AMAR371.9.20160331T171432Z.wav_chan0.xml	0
31/03/2016 17:28	AMAR371.9.20160331T172859Z.wav_chan0.xml	0
31/03/2016 17:43	AMAR371.9.20160331T174326Z.wav_chan0.xml	0
31/03/2016 17:57	AMAR371.9.20160331T175753Z.wav_chan0.xml	0
31/03/2016 18:12	AMAR371.9.20160331T181220Z.wav_chan0.xml	0
31/03/2016 18:26	AMAR371.9.20160331T182647Z.wav_chan0.xml	0
31/03/2016 18:41	AMAR371.9.20160331T184114Z.wav_chan0.xml	0
31/03/2016 18:55	AMAR371.9.20160331T185541Z.wav_chan0.xml	0
31/03/2016 19:10	AMAR371.9.20160331T191008Z.wav_chan0.xml	0
31/03/2016 19:24	AMAR371.9.20160331T192435Z.wav_chan0.xml	0
31/03/2016 19:39	AMAR371.9.20160331T193902Z.wav_chan0.xml	0
31/03/2016 19:53	AMAR371.9.20160331T195329Z.wav_chan0.xml	0
31/03/2016 20:07	AMAR371.9.20160331T200756Z.wav_chan0.xml	0
31/03/2016 20:22	AMAR371.9.20160331T202223Z.wav_chan0.xml	0
31/03/2016 20:36	AMAR371.9.20160331T203650Z.wav_chan0.xml	0
31/03/2016 20:51	AMAR371.9.20160331T205117Z.wav_chan0.xml	0
31/03/2016 21:05	AMAR371.9.20160331T210544Z.wav_chan0.xml	0
31/03/2016 21:20	AMAR371.9.20160331T212011Z.wav_chan0.xml	0
31/03/2016 21:34	AMAR371.9.20160331T213438Z.wav_chan0.xml	0
31/03/2016 21:49	AMAR371.9.20160331T214905Z.wav_chan0.xml	0
31/03/2016 22:03	AMAR371.9.20160331T220332Z.wav_chan0.xml	0
31/03/2016 22:17	AMAR371.9.20160331T221759Z.wav_chan0.xml	0
31/03/2016 22:32	AMAR371.9.20160331T223226Z.wav_chan0.xml	0
31/03/2016 22:46	AMAR371.9.20160331T224653Z.wav_chan0.xml	0
31/03/2016 23:01	AMAR371.9.20160331T230120Z.wav_chan0.xml	0
31/03/2016 23:15	AMAR371.9.20160331T231547Z.wav_chan0.xml	0
31/03/2016 23:30	AMAR371.9.20160331T233014Z.wav_chan0.xml	0
31/03/2016 23:44	AMAR371.9.20160331T234441Z.wav_chan0.xml	0
31/03/2016 23:59	AMAR371.9.20160331T235908Z.wav_chan0.xml	0
01/04/2016 0:13	AMAR371.9.20160401T001335Z.wav_chan0.xml	0
01/04/2016 0:28	AMAR371.9.20160401T002802Z.wav_chan0.xml	0
01/04/2016 0:42	AMAR371.9.20160401T004229Z.wav_chan0.xml	0
01/04/2016 0:56	AMAR371.9.20160401T005656Z.wav_chan0.xml	0
01/04/2016 1:11	AMAR371.9.20160401T011123Z.wav_chan0.xml	0
01/04/2016 1:25	AMAR371.9.20160401T012550Z.wav_chan0.xml	0
01/04/2016 1:40	AMAR371.9.20160401T014017Z.wav_chan0.xml	0
01/04/2016 1:54	AMAR371.9.20160401T015444Z.wav_chan0.xml	0
01/04/2016 2:09	AMAR371.9.20160401T020911Z.wav_chan0.xml	0
01/04/2016 2:23	AMAR371.9.20160401T022338Z.wav_chan0.xml	0
01/04/2016 2:38	AMAR371.9.20160401T023805Z.wav_chan0.xml	2
01/04/2016 2:52	AMAR371.9.20160401T025232Z.wav_chan0.xml	0
01/04/2016 3:06	AMAR371.9.20160401T030659Z.wav_chan0.xml	0
01/04/2016 3:21	AMAR371.9.20160401T032126Z.wav_chan0.xml	0
01/04/2016 3:35	AMAR371.9.20160401T033553Z.wav_chan0.xml	0
01/04/2016 3:50	AMAR371.9.20160401T035020Z.wav_chan0.xml	0
01/04/2016 4:04	AMAR371.9.20160401T040447Z.wav_chan0.xml	0
01/04/2016 4:19	AMAR371.9.20160401T041914Z.wav_chan0.xml	0
01/04/2016 4:33	AMAR371.9.20160401T043341Z.wav_chan0.xml	0
01/04/2016 4:48	AMAR371.9.20160401T044808Z.wav_chan0.xml	0
01/04/2016 5:02	AMAR371.9.20160401T050235Z.wav_chan0.xml	0
01/04/2016 5:17	AMAR371.9.20160401T051702Z.wav_chan0.xml	0
01/04/2016 5:31	AMAR371.9.20160401T053129Z.wav_chan0.xml	0
01/04/2016 5:45	AMAR371.9.20160401T054556Z.wav_chan0.xml	0
01/04/2016 6:00	AMAR371.9.20160401T060023Z.wav_chan0.xml	0
01/04/2016 6:14	AMAR371.9.20160401T061450Z.wav_chan0.xml	0
01/04/2016 6:29	AMAR371.9.20160401T062917Z.wav_chan0.xml	0
01/04/2016 6:43	AMAR371.9.20160401T064344Z.wav_chan0.xml	0
01/04/2016 6:58	AMAR371.9.20160401T065811Z.wav_chan0.xml	0
01/04/2016 7:12	AMAR371.9.20160401T071238Z.wav_chan0.xml	0
01/04/2016 7:27	AMAR371.9.20160401T072705Z.wav_chan0.xml	0
01/04/2016 7:41	AMAR371.9.20160401T074132Z.wav_chan0.xml	0
01/04/2016 7:55	AMAR371.9.20160401T075559Z.wav_chan0.xml	0
01/04/2016 8:10	AMAR371.9.20160401T081026Z.wav_chan0.xml	0
01/04/2016 8:24	AMAR371.9.20160401T082453Z.wav_chan0.xml	0
01/04/2016 8:39	AMAR371.9.20160401T083920Z.wav_chan0.xml	0
01/04/2016 8:53	AMAR371.9.20160401T085347Z.wav_chan0.xml	0
01/04/2016 9:08	AMAR371.9.20160401T090814Z.wav_chan0.xml	0
01/04/2016 9:22	AMAR371.9.20160401T092241Z.wav_chan0.xml	0
01/04/2016 9:37	AMAR371.9.20160401T093708Z.wav_chan0.xml	0
01/04/2016 9:51	AMAR371.9.20160401T095135Z.wav_chan0.xml	0
01/04/2016 10:06	AMAR371.9.20160401T100602Z.wav_chan0.xml	0
01/04/2016 10:20	AMAR371.9.20160401T102029Z.wav_chan0.xml	0
01/04/2016 10:34	AMAR371.9.20160401T103456Z.wav_chan0.xml	0
01/04/2016 10:49	AMAR371.9.20160401T104923Z.wav_chan0.xml	0
01/04/2016 11:03	AMAR371.9.20160401T110350Z.wav_chan0.xml	0
01/04/2016 11:18	AMAR371.9.20160401T111817Z.wav_chan0.xml	0
01/04/2016 11:32	AMAR371.9.20160401T113244Z.wav_chan0.xml	0
01/04/2016 11:47	AMAR371.9.20160401T114711Z.wav_chan0.xml	0
01/04/2016 12:01	AMAR371.9.20160401T120138Z.wav_chan0.xml	0
01/04/2016 12:16	AMAR371.9.20160401T121605Z.wav_chan0.xml	0
01/04/2016 12:30	AMAR371.9.20160401T123032Z.wav_chan0.xml	0
01/04/2016 12:44	AMAR371.9.20160401T124459Z.wav_chan0.xml	0
01/04/2016 12:59	AMAR371.9.20160401T125926Z.wav_chan0.xml	0
01/04/2016 13:13	AMAR371.9.20160401T131353Z.wav_chan0.xml	0
01/04/2016 13:28	AMAR371.9.20160401T132820Z.wav_chan0.xml	0
01/04/2016 13:42	AMAR371.9.20160401T134247Z.wav_chan0.xml	0
01/04/2016 13:57	AMAR371.9.20160401T135714Z.wav_chan0.xml	0
01/04/2016 14:11	AMAR371.9.20160401T141141Z.wav_chan0.xml	0
01/04/2016 14:26	AMAR371.9.20160401T142608Z.wav_chan0.xml	0
01/04/2016 14:40	AMAR371.9.20160401T144035Z.wav_chan0.xml	0
01/04/2016 14:55	AMAR371.9.20160401T145502Z.wav_chan0.xml	0
01/04/2016 15:09	AMAR371.9.20160401T150929Z.wav_chan0.xml	0
01/04/2016 15:23	AMAR371.9.20160401T152356Z.wav_chan0.xml	0
01/04/2016 15:38	AMAR371.9.20160401T153823Z.wav_chan0.xml	0
01/04/2016 15:52	AMAR371.9.20160401T155250Z.wav_chan0.xml	0
01/04/2016 16:07	AMAR371.9.20160401T160717Z.wav_chan0.xml	0
01/04/2016 16:21	AMAR371.9.20160401T162144Z.wav_chan0.xml	0
01/04/2016 16:36	AMAR371.9.20160401T163611Z.wav_chan0.xml	0
01/04/2016 16:50	AMAR371.9.20160401T165038Z.wav_chan0.xml	0
01/04/2016 17:05	AMAR371.9.20160401T170505Z.wav_chan0.xml	0
01/04/2016 17:19	AMAR371.9.20160401T171932Z.wav_chan0.xml	0
01/04/2016 17:33	AMAR371.9.20160401T173359Z.wav_chan0.xml	0
01/04/2016 17:48	AMAR371.9.20160401T174826Z.wav_chan0.xml	0
01/04/2016 18:02	AMAR371.9.20160401T180253Z.wav_chan0.xml	0
01/04/2016 18:17	AMAR371.9.20160401T181720Z.wav_chan0.xml	0
01/04/2016 18:31	AMAR371.9.20160401T183147Z.wav_chan0.xml	0
01/04/2016 18:46	AMAR371.9.20160401T184614Z.wav_chan0.xml	0
01/04/2016 19:00	AMAR371.9.20160401T190041Z.wav_chan0.xml	0
01/04/2016 19:15	AMAR371.9.20160401T191508Z.wav_chan0.xml	0
01/04/2016 19:29	AMAR371.9.20160401T192935Z.wav_chan0.xml	0
01/04/2016 19:44	AMAR371.9.20160401T194402Z.wav_chan0.xml	0
01/04/2016 19:58	AMAR371.9.20160401T195829Z.wav_chan0.xml	0
01/04/2016 20:12	AMAR371.9.20160401T201256Z.wav_chan0.xml	0
01/04/2016 20:27	AMAR371.9.20160401T202723Z.wav_chan0.xml	0
01/04/2016 20:41	AMAR371.9.20160401T204150Z.wav_chan0.xml	0
01/04/2016 20:56	AMAR371.9.20160401T205617Z.wav_chan0.xml	0
01/04/2016 21:10	AMAR371.9.20160401T211044Z.wav_chan0.xml	0
01/04/2016 21:25	AMAR371.9.20160401T212511Z.wav_chan0.xml	0
01/04/2016 21:39	AMAR371.9.20160401T213938Z.wav_chan0.xml	0
01/04/2016 21:54	AMAR371.9.20160401T215405Z.wav_chan0.xml	0
01/04/2016 22:08	AMAR371.9.20160401T220832Z.wav_chan0.xml	0
01/04/2016 22:22	AMAR371.9.20160401T222259Z.wav_chan0.xml	0
01/04/2016 22:37	AMAR371.9.20160401T223726Z.wav_chan0.xml	0
01/04/2016 22:51	AMAR371.9.20160401T225153Z.wav_chan0.xml	0
01/04/2016 23:06	AMAR371.9.20160401T230620Z.wav_chan0.xml	0
01/04/2016 23:20	AMAR371.9.20160401T232047Z.wav_chan0.xml	0
01/04/2016 23:35	AMAR371.9.20160401T233514Z.wav_chan0.xml	0
01/04/2016 23:49	AMAR371.9.20160401T234941Z.wav_chan0.xml	0
02/04/2016 0:04	AMAR371.9.20160402T000408Z.wav_chan0.xml	0
02/04/2016 0:18	AMAR371.9.20160402T001835Z.wav_chan0.xml	0
02/04/2016 0:33	AMAR371.9.20160402T003302Z.wav_chan0.xml	0
02/04/2016 0:47	AMAR371.9.20160402T004729Z.wav_chan0.xml	0
02/04/2016 1:01	AMAR371.9.20160402T010156Z.wav_chan0.xml	0
02/04/2016 1:16	AMAR371.9.20160402T011623Z.wav_chan0.xml	0
02/04/2016 1:30	AMAR371.9.20160402T013050Z.wav_chan0.xml	0
02/04/2016 1:45	AMAR371.9.20160402T014517Z.wav_chan0.xml	0
02/04/2016 1:59	AMAR371.9.20160402T015944Z.wav_chan0.xml	0
02/04/2016 2:14	AMAR371.9.20160402T021411Z.wav_chan0.xml	0
02/04/2016 2:28	AMAR371.9.20160402T022838Z.wav_chan0.xml	0
02/04/2016 2:43	AMAR371.9.20160402T024305Z.wav_chan0.xml	0
02/04/2016 2:57	AMAR371.9.20160402T025732Z.wav_chan0.xml	0
02/04/2016 3:11	AMAR371.9.20160402T031159Z.wav_chan0.xml	0
02/04/2016 3:26	AMAR371.9.20160402T032626Z.wav_chan0.xml	0
02/04/2016 3:40	AMAR371.9.20160402T034053Z.wav_chan0.xml	0
02/04/2016 3:55	AMAR371.9.20160402T035520Z.wav_chan0.xml	0
02/04/2016 4:09	AMAR371.9.20160402T040947Z.wav_chan0.xml	0
02/04/2016 4:24	AMAR371.9.20160402T042414Z.wav_chan0.xml	0
02/04/2016 4:38	AMAR371.9.20160402T043841Z.wav_chan0.xml	0
02/04/2016 4:53	AMAR371.9.20160402T045308Z.wav_chan0.xml	0
02/04/2016 5:07	AMAR371.9.20160402T050735Z.wav_chan0.xml	0
02/04/2016 5:22	AMAR371.9.20160402T052202Z.wav_chan0.xml	0
02/04/2016 5:36	AMAR371.9.20160402T053629Z.wav_chan0.xml	0
02/04/2016 5:50	AMAR371.9.20160402T055056Z.wav_chan0.xml	0
02/04/2016 6:05	AMAR371.9.20160402T060523Z.wav_chan0.xml	0
02/04/2016 6:19	AMAR371.9.20160402T061950Z.wav_chan0.xml	0
02/04/2016 6:34	AMAR371.9.20160402T063417Z.wav_chan0.xml	0
02/04/2016 6:48	AMAR371.9.20160402T064844Z.wav_chan0.xml	0
02/04/2016 7:03	AMAR371.9.20160402T070311Z.wav_chan0.xml	0
02/04/2016 7:17	AMAR371.9.20160402T071738Z.wav_chan0.xml	0
02/04/2016 7:32	AMAR371.9.20160402T073205Z.wav_chan0.xml	0
02/04/2016 7:46	AMAR371.9.20160402T074632Z.wav_chan0.xml	0
02/04/2016 8:00	AMAR371.9.20160402T080059Z.wav_chan0.xml	0
02/04/2016 8:15	AMAR371.9.20160402T081526Z.wav_chan0.xml	0
02/04/2016 8:29	AMAR371.9.20160402T082953Z.wav_chan0.xml	0
02/04/2016 8:44	AMAR371.9.20160402T084420Z.wav_chan0.xml	0
02/04/2016 8:58	AMAR371.9.20160402T085847Z.wav_chan0.xml	0
02/04/2016 9:13	AMAR371.9.20160402T091314Z.wav_chan0.xml	0
02/04/2016 9:27	AMAR371.9.20160402T092741Z.wav_chan0.xml	0
02/04/2016 9:42	AMAR371.9.20160402T094208Z.wav_chan0.xml	0
02/04/2016 9:56	AMAR371.9.20160402T095635Z.wav_chan0.xml	0
02/04/2016 10:11	AMAR371.9.20160402T101102Z.wav_chan0.xml	0
02/04/2016 10:25	AMAR371.9.20160402T102529Z.wav_chan0.xml	0
02/04/2016 10:39	AMAR371.9.20160402T103956Z.wav_chan0.xml	0
02/04/2016 10:54	AMAR371.9.20160402T105423Z.wav_chan0.xml	0
02/04/2016 11:08	AMAR371.9.20160402T110850Z.wav_chan0.xml	0
02/04/2016 11:23	AMAR371.9.20160402T112317Z.wav_chan0.xml	0
02/04/2016 11:37	AMAR371.9.20160402T113744Z.wav_chan0.xml	0
02/04/2016 11:52	AMAR371.9.20160402T115211Z.wav_chan0.xml	0
02/04/2016 12:06	AMAR371.9.20160402T120638Z.wav_chan0.xml	0
02/04/2016 12:21	AMAR371.9.20160402T122105Z.wav_chan0.xml	0
02/04/2016 12:35	AMAR371.9.20160402T123532Z.wav_chan0.xml	0
02/04/2016 12:49	AMAR371.9.20160402T124959Z.wav_chan0.xml	0
02/04/2016 13:04	AMAR371.9.20160402T130426Z.wav_chan0.xml	0
02/04/2016 13:18	AMAR371.9.20160402T131853Z.wav_chan0.xml	0
02/04/2016 13:33	AMAR371.9.20160402T133320Z.wav_chan0.xml	0
02/04/2016 13:47	AMAR371.9.20160402T134747Z.wav_chan0.xml	0
02/04/2016 14:02	AMAR371.9.20160402T140214Z.wav_chan0.xml	0
02/04/2016 14:16	AMAR371.9.20160402T141641Z.wav_chan0.xml	0
02/04/2016 14:31	AMAR371.9.20160402T143108Z.wav_chan0.xml	0
02/04/2016 14:45	AMAR371.9.20160402T144535Z.wav_chan0.xml	0
02/04/2016 15:00	AMAR371.9.20160402T150002Z.wav_chan0.xml	0
02/04/2016 15:14	AMAR371.9.20160402T151429Z.wav_chan0.xml	0
02/04/2016 15:28	AMAR371.9.20160402T152856Z.wav_chan0.xml	0
02/04/2016 15:43	AMAR371.9.20160402T154323Z.wav_chan0.xml	0
02/04/2016 15:57	AMAR371.9.20160402T155750Z.wav_chan0.xml	0
02/04/2016 16:12	AMAR371.9.20160402T161217Z.wav_chan0.xml	0
02/04/2016 16:26	AMAR371.9.20160402T162644Z.wav_chan0.xml	0
02/04/2016 16:41	AMAR371.9.20160402T164111Z.wav_chan0.xml	0
02/04/2016 16:55	AMAR371.9.20160402T165538Z.wav_chan0.xml	0
02/04/2016 17:10	AMAR371.9.20160402T171005Z.wav_chan0.xml	0
02/04/2016 17:24	AMAR371.9.20160402T172432Z.wav_chan0.xml	0
02/04/2016 17:38	AMAR371.9.20160402T173859Z.wav_chan0.xml	0
02/04/2016 17:53	AMAR371.9.20160402T175326Z.wav_chan0.xml	0
02/04/2016 18:07	AMAR371.9.20160402T180753Z.wav_chan0.xml	0
02/04/2016 18:22	AMAR371.9.20160402T182220Z.wav_chan0.xml	0
02/04/2016 18:36	AMAR371.9.20160402T183647Z.wav_chan0.xml	0
02/04/2016 18:51	AMAR371.9.20160402T185114Z.wav_chan0.xml	0
02/04/2016 19:05	AMAR371.9.20160402T190541Z.wav_chan0.xml	0
02/04/2016 19:20	AMAR371.9.20160402T192008Z.wav_chan0.xml	0
02/04/2016 19:34	AMAR371.9.20160402T193435Z.wav_chan0.xml	0
02/04/2016 19:49	AMAR371.9.20160402T194902Z.wav_chan0.xml	0
02/04/2016 20:03	AMAR371.9.20160402T200329Z.wav_chan0.xml	0
02/04/2016 20:17	AMAR371.9.20160402T201756Z.wav_chan0.xml	0
02/04/2016 20:32	AMAR371.9.20160402T203223Z.wav_chan0.xml	0
02/04/2016 20:46	AMAR371.9.20160402T204650Z.wav_chan0.xml	0
02/04/2016 21:01	AMAR371.9.20160402T210117Z.wav_chan0.xml	0
02/04/2016 21:15	AMAR371.9.20160402T211544Z.wav_chan0.xml	0
02/04/2016 21:30	AMAR371.9.20160402T213011Z.wav_chan0.xml	0
02/04/2016 21:44	AMAR371.9.20160402T214438Z.wav_chan0.xml	0
02/04/2016 21:59	AMAR371.9.20160402T215905Z.wav_chan0.xml	0
02/04/2016 22:13	AMAR371.9.20160402T221332Z.wav_chan0.xml	0
02/04/2016 22:27	AMAR371.9.20160402T222759Z.wav_chan0.xml	5
02/04/2016 22:42	AMAR371.9.20160402T224226Z.wav_chan0.xml	0
02/04/2016 22:56	AMAR371.9.20160402T225653Z.wav_chan0.xml	0
02/04/2016 23:11	AMAR371.9.20160402T231120Z.wav_chan0.xml	0
02/04/2016 23:25	AMAR371.9.20160402T232547Z.wav_chan0.xml	0
02/04/2016 23:40	AMAR371.9.20160402T234014Z.wav_chan0.xml	0
02/04/2016 23:54	AMAR371.9.20160402T235441Z.wav_chan0.xml	0
03/04/2016 0:09	AMAR371.9.20160403T000908Z.wav_chan0.xml	0
03/04/2016 0:23	AMAR371.9.20160403T002335Z.wav_chan0.xml	0
03/04/2016 0:38	AMAR371.9.20160403T003802Z.wav_chan0.xml	0
03/04/2016 0:52	AMAR371.9.20160403T005229Z.wav_chan0.xml	0
03/04/2016 1:06	AMAR371.9.20160403T010656Z.wav_chan0.xml	0
03/04/2016 1:21	AMAR371.9.20160403T012123Z.wav_chan0.xml	0
03/04/2016 1:35	AMAR371.9.20160403T013550Z.wav_chan0.xml	0
03/04/2016 1:50	AMAR371.9.20160403T015017Z.wav_chan0.xml	0
03/04/2016 2:04	AMAR371.9.20160403T020444Z.wav_chan0.xml	0
03/04/2016 2:19	AMAR371.9.20160403T021911Z.wav_chan0.xml	0
03/04/2016 2:33	AMAR371.9.20160403T023338Z.wav_chan0.xml	0
03/04/2016 2:48	AMAR371.9.20160403T024805Z.wav_chan0.xml	0
03/04/2016 3:02	AMAR371.9.20160403T030232Z.wav_chan0.xml	0
03/04/2016 3:16	AMAR371.9.20160403T031659Z.wav_chan0.xml	0
03/04/2016 3:31	AMAR371.9.20160403T033126Z.wav_chan0.xml	0
03/04/2016 3:45	AMAR371.9.20160403T034553Z.wav_chan0.xml	0
03/04/2016 4:00	AMAR371.9.20160403T040020Z.wav_chan0.xml	0
03/04/2016 4:14	AMAR371.9.20160403T041447Z.wav_chan0.xml	0
03/04/2016 4:29	AMAR371.9.20160403T042914Z.wav_chan0.xml	0
03/04/2016 4:43	AMAR371.9.20160403T044341Z.wav_chan0.xml	0
03/04/2016 4:58	AMAR371.9.20160403T045808Z.wav_chan0.xml	0
03/04/2016 5:12	AMAR371.9.20160403T051235Z.wav_chan0.xml	0
03/04/2016 5:27	AMAR371.9.20160403T052702Z.wav_chan0.xml	0
03/04/2016 5:41	AMAR371.9.20160403T054129Z.wav_chan0.xml	0
03/04/2016 5:55	AMAR371.9.20160403T055556Z.wav_chan0.xml	0
03/04/2016 6:10	AMAR371.9.20160403T061023Z.wav_chan0.xml	0
03/04/2016 6:24	AMAR371.9.20160403T062450Z.wav_chan0.xml	0
03/04/2016 6:39	AMAR371.9.20160403T063917Z.wav_chan0.xml	0
03/04/2016 6:53	AMAR371.9.20160403T065344Z.wav_chan0.xml	0
03/04/2016 7:08	AMAR371.9.20160403T070811Z.wav_chan0.xml	0
03/04/2016 7:22	AMAR371.9.20160403T072238Z.wav_chan0.xml	0
03/04/2016 7:37	AMAR371.9.20160403T073705Z.wav_chan0.xml	0
03/04/2016 7:51	AMAR371.9.20160403T075132Z.wav_chan0.xml	0
03/04/2016 8:05	AMAR371.9.20160403T080559Z.wav_chan0.xml	0
03/04/2016 8:20	AMAR371.9.20160403T082026Z.wav_chan0.xml	0
03/04/2016 8:34	AMAR371.9.20160403T083453Z.wav_chan0.xml	0
03/04/2016 8:49	AMAR371.9.20160403T084920Z.wav_chan0.xml	0
03/04/2016 9:03	AMAR371.9.20160403T090347Z.wav_chan0.xml	0
03/04/2016 9:18	AMAR371.9.20160403T091814Z.wav_chan0.xml	0
03/04/2016 9:32	AMAR371.9.20160403T093241Z.wav_chan0.xml	0
03/04/2016 9:47	AMAR371.9.20160403T094708Z.wav_chan0.xml	0
03/04/2016 10:01	AMAR371.9.20160403T100135Z.wav_chan0.xml	0
03/04/2016 10:16	AMAR371.9.20160403T101602Z.wav_chan0.xml	0
03/04/2016 10:30	AMAR371.9.20160403T103029Z.wav_chan0.xml	0
03/04/2016 10:44	AMAR371.9.20160403T104456Z.wav_chan0.xml	0
03/04/2016 10:59	AMAR371.9.20160403T105923Z.wav_chan0.xml	0
03/04/2016 11:13	AMAR371.9.20160403T111350Z.wav_chan0.xml	0
03/04/2016 11:28	AMAR371.9.20160403T112817Z.wav_chan0.xml	0
03/04/2016 11:42	AMAR371.9.20160403T114244Z.wav_chan0.xml	0
03/04/2016 11:57	AMAR371.9.20160403T115711Z.wav_chan0.xml	0
03/04/2016 12:11	AMAR371.9.20160403T121138Z.wav_chan0.xml	0
03/04/2016 12:26	AMAR371.9.20160403T122605Z.wav_chan0.xml	0
03/04/2016 12:40	AMAR371.9.20160403T124032Z.wav_chan0.xml	0
03/04/2016 12:54	AMAR371.9.20160403T125459Z.wav_chan0.xml	0
03/04/2016 13:09	AMAR371.9.20160403T130926Z.wav_chan0.xml	0
03/04/2016 13:23	AMAR371.9.20160403T132353Z.wav_chan0.xml	0
03/04/2016 13:38	AMAR371.9.20160403T133820Z.wav_chan0.xml	0
03/04/2016 13:52	AMAR371.9.20160403T135247Z.wav_chan0.xml	0
03/04/2016 14:07	AMAR371.9.20160403T140714Z.wav_chan0.xml	0
03/04/2016 14:21	AMAR371.9.20160403T142141Z.wav_chan0.xml	0
03/04/2016 14:36	AMAR371.9.20160403T143608Z.wav_chan0.xml	0
03/04/2016 14:50	AMAR371.9.20160403T145035Z.wav_chan0.xml	0
03/04/2016 15:05	AMAR371.9.20160403T150502Z.wav_chan0.xml	0
03/04/2016 15:19	AMAR371.9.20160403T151929Z.wav_chan0.xml	0
03/04/2016 15:33	AMAR371.9.20160403T153356Z.wav_chan0.xml	0
03/04/2016 15:48	AMAR371.9.20160403T154823Z.wav_chan0.xml	0
03/04/2016 16:02	AMAR371.9.20160403T160250Z.wav_chan0.xml	0
03/04/2016 16:17	AMAR371.9.20160403T161717Z.wav_chan0.xml	0
03/04/2016 16:31	AMAR371.9.20160403T163144Z.wav_chan0.xml	0
03/04/2016 16:46	AMAR371.9.20160403T164611Z.wav_chan0.xml	0
03/04/2016 17:00	AMAR371.9.20160403T170038Z.wav_chan0.xml	0
03/04/2016 17:15	AMAR371.9.20160403T171505Z.wav_chan0.xml	0
03/04/2016 17:29	AMAR371.9.20160403T172932Z.wav_chan0.xml	0
03/04/2016 17:43	AMAR371.9.20160403T174359Z.wav_chan0.xml	0
03/04/2016 17:58	AMAR371.9.20160403T175826Z.wav_chan0.xml	0
03/04/2016 18:12	AMAR371.9.20160403T181253Z.wav_chan0.xml	0
03/04/2016 18:27	AMAR371.9.20160403T182720Z.wav_chan0.xml	0
03/04/2016 18:41	AMAR371.9.20160403T184147Z.wav_chan0.xml	0
03/04/2016 18:56	AMAR371.9.20160403T185614Z.wav_chan0.xml	0
03/04/2016 19:10	AMAR371.9.20160403T191041Z.wav_chan0.xml	0
03/04/2016 19:25	AMAR371.9.20160403T192508Z.wav_chan0.xml	0
03/04/2016 19:39	AMAR371.9.20160403T193935Z.wav_chan0.xml	0
03/04/2016 19:54	AMAR371.9.20160403T195402Z.wav_chan0.xml	0
03/04/2016 20:08	AMAR371.9.20160403T200829Z.wav_chan0.xml	0
03/04/2016 20:22	AMAR371.9.20160403T202256Z.wav_chan0.xml	0
03/04/2016 20:37	AMAR371.9.20160403T203723Z.wav_chan0.xml	0
03/04/2016 20:51	AMAR371.9.20160403T205150Z.wav_chan0.xml	0
03/04/2016 21:06	AMAR371.9.20160403T210617Z.wav_chan0.xml	0
03/04/2016 21:20	AMAR371.9.20160403T212044Z.wav_chan0.xml	0
03/04/2016 21:35	AMAR371.9.20160403T213511Z.wav_chan0.xml	0
03/04/2016 21:49	AMAR371.9.20160403T214938Z.wav_chan0.xml	0
03/04/2016 22:04	AMAR371.9.20160403T220405Z.wav_chan0.xml	0
03/04/2016 22:18	AMAR371.9.20160403T221832Z.wav_chan0.xml	0
03/04/2016 22:32	AMAR371.9.20160403T223259Z.wav_chan0.xml	0
03/04/2016 22:47	AMAR371.9.20160403T224726Z.wav_chan0.xml	0
03/04/2016 23:01	AMAR371.9.20160403T230153Z.wav_chan0.xml	0
03/04/2016 23:16	AMAR371.9.20160403T231620Z.wav_chan0.xml	0
03/04/2016 23:30	AMAR371.9.20160403T233047Z.wav_chan0.xml	0
03/04/2016 23:45	AMAR371.9.20160403T234514Z.wav_chan0.xml	0
03/04/2016 23:59	AMAR371.9.20160403T235941Z.wav_chan0.xml	0
04/04/2016 0:14	AMAR371.9.20160404T001408Z.wav_chan0.xml	0
04/04/2016 0:28	AMAR371.9.20160404T002835Z.wav_chan0.xml	0
04/04/2016 0:43	AMAR371.9.20160404T004302Z.wav_chan0.xml	0
04/04/2016 0:57	AMAR371.9.20160404T005729Z.wav_chan0.xml	0
04/04/2016 1:11	AMAR371.9.20160404T011156Z.wav_chan0.xml	0
04/04/2016 1:26	AMAR371.9.20160404T012623Z.wav_chan0.xml	0
04/04/2016 1:40	AMAR371.9.20160404T014050Z.wav_chan0.xml	0
04/04/2016 1:55	AMAR371.9.20160404T015517Z.wav_chan0.xml	0
04/04/2016 2:09	AMAR371.9.20160404T020944Z.wav_chan0.xml	0
04/04/2016 2:24	AMAR371.9.20160404T022411Z.wav_chan0.xml	0
04/04/2016 2:38	AMAR371.9.20160404T023838Z.wav_chan0.xml	0
04/04/2016 2:53	AMAR371.9.20160404T025305Z.wav_chan0.xml	1
04/04/2016 3:07	AMAR371.9.20160404T030732Z.wav_chan0.xml	0
04/04/2016 3:21	AMAR371.9.20160404T032159Z.wav_chan0.xml	0
04/04/2016 3:36	AMAR371.9.20160404T033626Z.wav_chan0.xml	0
04/04/2016 3:50	AMAR371.9.20160404T035053Z.wav_chan0.xml	0
04/04/2016 4:05	AMAR371.9.20160404T040520Z.wav_chan0.xml	0
04/04/2016 4:19	AMAR371.9.20160404T041947Z.wav_chan0.xml	0
04/04/2016 4:34	AMAR371.9.20160404T043414Z.wav_chan0.xml	0
04/04/2016 4:48	AMAR371.9.20160404T044841Z.wav_chan0.xml	0
04/04/2016 5:03	AMAR371.9.20160404T050308Z.wav_chan0.xml	0
04/04/2016 5:17	AMAR371.9.20160404T051735Z.wav_chan0.xml	0
04/04/2016 5:32	AMAR371.9.20160404T053202Z.wav_chan0.xml	0
04/04/2016 5:46	AMAR371.9.20160404T054629Z.wav_chan0.xml	0
04/04/2016 6:00	AMAR371.9.20160404T060056Z.wav_chan0.xml	0
04/04/2016 6:15	AMAR371.9.20160404T061523Z.wav_chan0.xml	0
04/04/2016 6:29	AMAR371.9.20160404T062950Z.wav_chan0.xml	0
04/04/2016 6:44	AMAR371.9.20160404T064417Z.wav_chan0.xml	0
04/04/2016 6:58	AMAR371.9.20160404T065844Z.wav_chan0.xml	0
04/04/2016 7:13	AMAR371.9.20160404T071311Z.wav_chan0.xml	0
04/04/2016 7:27	AMAR371.9.20160404T072738Z.wav_chan0.xml	0
04/04/2016 7:42	AMAR371.9.20160404T074205Z.wav_chan0.xml	0
04/04/2016 7:56	AMAR371.9.20160404T075632Z.wav_chan0.xml	0
04/04/2016 8:10	AMAR371.9.20160404T081059Z.wav_chan0.xml	0
04/04/2016 8:25	AMAR371.9.20160404T082526Z.wav_chan0.xml	0
04/04/2016 8:39	AMAR371.9.20160404T083953Z.wav_chan0.xml	0
04/04/2016 8:54	AMAR371.9.20160404T085420Z.wav_chan0.xml	0
04/04/2016 9:08	AMAR371.9.20160404T090847Z.wav_chan0.xml	0
04/04/2016 9:23	AMAR371.9.20160404T092314Z.wav_chan0.xml	0
04/04/2016 9:37	AMAR371.9.20160404T093741Z.wav_chan0.xml	0
04/04/2016 9:52	AMAR371.9.20160404T095208Z.wav_chan0.xml	0
04/04/2016 10:06	AMAR371.9.20160404T100635Z.wav_chan0.xml	0
04/04/2016 10:21	AMAR371.9.20160404T102102Z.wav_chan0.xml	0
04/04/2016 10:35	AMAR371.9.20160404T103529Z.wav_chan0.xml	0
04/04/2016 10:49	AMAR371.9.20160404T104956Z.wav_chan0.xml	0
04/04/2016 11:04	AMAR371.9.20160404T110423Z.wav_chan0.xml	0
04/04/2016 11:18	AMAR371.9.20160404T111850Z.wav_chan0.xml	0
04/04/2016 11:33	AMAR371.9.20160404T113317Z.wav_chan0.xml	0
04/04/2016 11:47	AMAR371.9.20160404T114744Z.wav_chan0.xml	0
04/04/2016 12:02	AMAR371.9.20160404T120211Z.wav_chan0.xml	0
04/04/2016 12:16	AMAR371.9.20160404T121638Z.wav_chan0.xml	0
04/04/2016 12:31	AMAR371.9.20160404T123105Z.wav_chan0.xml	0
04/04/2016 12:45	AMAR371.9.20160404T124532Z.wav_chan0.xml	0
04/04/2016 12:59	AMAR371.9.20160404T125959Z.wav_chan0.xml	0
04/04/2016 13:14	AMAR371.9.20160404T131426Z.wav_chan0.xml	0
04/04/2016 13:28	AMAR371.9.20160404T132853Z.wav_chan0.xml	0
04/04/2016 13:43	AMAR371.9.20160404T134320Z.wav_chan0.xml	0
04/04/2016 13:57	AMAR371.9.20160404T135747Z.wav_chan0.xml	0
04/04/2016 14:12	AMAR371.9.20160404T141214Z.wav_chan0.xml	0
04/04/2016 14:26	AMAR371.9.20160404T142641Z.wav_chan0.xml	0
04/04/2016 14:41	AMAR371.9.20160404T144108Z.wav_chan0.xml	0
04/04/2016 14:55	AMAR371.9.20160404T145535Z.wav_chan0.xml	0
04/04/2016 15:10	AMAR371.9.20160404T151002Z.wav_chan0.xml	0
04/04/2016 15:24	AMAR371.9.20160404T152429Z.wav_chan0.xml	0
04/04/2016 15:38	AMAR371.9.20160404T153856Z.wav_chan0.xml	0
04/04/2016 15:53	AMAR371.9.20160404T155323Z.wav_chan0.xml	0
04/04/2016 16:07	AMAR371.9.20160404T160750Z.wav_chan0.xml	0
04/04/2016 16:22	AMAR371.9.20160404T162217Z.wav_chan0.xml	0
04/04/2016 16:36	AMAR371.9.20160404T163644Z.wav_chan0.xml	0
04/04/2016 16:51	AMAR371.9.20160404T165111Z.wav_chan0.xml	0
04/04/2016 17:05	AMAR371.9.20160404T170538Z.wav_chan0.xml	0
04/04/2016 17:20	AMAR371.9.20160404T172005Z.wav_chan0.xml	0
04/04/2016 17:34	AMAR371.9.20160404T173432Z.wav_chan0.xml	0
04/04/2016 17:48	AMAR371.9.20160404T174859Z.wav_chan0.xml	0
04/04/2016 18:03	AMAR371.9.20160404T180326Z.wav_chan0.xml	0
04/04/2016 18:17	AMAR371.9.20160404T181753Z.wav_chan0.xml	0
04/04/2016 18:32	AMAR371.9.20160404T183220Z.wav_chan0.xml	0
04/04/2016 18:46	AMAR371.9.20160404T184647Z.wav_chan0.xml	0
04/04/2016 19:01	AMAR371.9.20160404T190114Z.wav_chan0.xml	0
04/04/2016 19:15	AMAR371.9.20160404T191541Z.wav_chan0.xml	0
04/04/2016 19:30	AMAR371.9.20160404T193008Z.wav_chan0.xml	0
04/04/2016 19:44	AMAR371.9.20160404T194435Z.wav_chan0.xml	0
04/04/2016 19:59	AMAR371.9.20160404T195902Z.wav_chan0.xml	0
04/04/2016 20:13	AMAR371.9.20160404T201329Z.wav_chan0.xml	0
04/04/2016 20:27	AMAR371.9.20160404T202756Z.wav_chan0.xml	0
04/04/2016 20:42	AMAR371.9.20160404T204223Z.wav_chan0.xml	0
04/04/2016 20:56	AMAR371.9.20160404T205650Z.wav_chan0.xml	0
04/04/2016 21:11	AMAR371.9.20160404T211117Z.wav_chan0.xml	0
04/04/2016 21:25	AMAR371.9.20160404T212544Z.wav_chan0.xml	0
04/04/2016 21:40	AMAR371.9.20160404T214011Z.wav_chan0.xml	0
04/04/2016 21:54	AMAR371.9.20160404T215438Z.wav_chan0.xml	0
04/04/2016 22:09	AMAR371.9.20160404T220905Z.wav_chan0.xml	0
04/04/2016 22:23	AMAR371.9.20160404T222332Z.wav_chan0.xml	0
04/04/2016 22:37	AMAR371.9.20160404T223759Z.wav_chan0.xml	0
04/04/2016 22:52	AMAR371.9.20160404T225226Z.wav_chan0.xml	0
04/04/2016 23:06	AMAR371.9.20160404T230653Z.wav_chan0.xml	0
04/04/2016 23:21	AMAR371.9.20160404T232120Z.wav_chan0.xml	0
04/04/2016 23:35	AMAR371.9.20160404T233547Z.wav_chan0.xml	0
04/04/2016 23:50	AMAR371.9.20160404T235014Z.wav_chan0.xml	0
05/04/2016 0:04	AMAR371.9.20160405T000441Z.wav_chan0.xml	0
05/04/2016 0:19	AMAR371.9.20160405T001908Z.wav_chan0.xml	0
05/04/2016 0:33	AMAR371.9.20160405T003335Z.wav_chan0.xml	0
05/04/2016 0:48	AMAR371.9.20160405T004802Z.wav_chan0.xml	0
05/04/2016 1:02	AMAR371.9.20160405T010229Z.wav_chan0.xml	0
05/04/2016 1:16	AMAR371.9.20160405T011656Z.wav_chan0.xml	0
05/04/2016 1:31	AMAR371.9.20160405T013123Z.wav_chan0.xml	0
05/04/2016 1:45	AMAR371.9.20160405T014550Z.wav_chan0.xml	0
05/04/2016 2:00	AMAR371.9.20160405T020017Z.wav_chan0.xml	0
05/04/2016 2:14	AMAR371.9.20160405T021444Z.wav_chan0.xml	0
05/04/2016 2:29	AMAR371.9.20160405T022911Z.wav_chan0.xml	0
05/04/2016 2:43	AMAR371.9.20160405T024338Z.wav_chan0.xml	0
05/04/2016 2:58	AMAR371.9.20160405T025805Z.wav_chan0.xml	0
05/04/2016 3:12	AMAR371.9.20160405T031232Z.wav_chan0.xml	0
05/04/2016 3:26	AMAR371.9.20160405T032659Z.wav_chan0.xml	0
05/04/2016 3:41	AMAR371.9.20160405T034126Z.wav_chan0.xml	0
05/04/2016 3:55	AMAR371.9.20160405T035553Z.wav_chan0.xml	0
05/04/2016 4:10	AMAR371.9.20160405T041020Z.wav_chan0.xml	0
05/04/2016 4:24	AMAR371.9.20160405T042447Z.wav_chan0.xml	0
05/04/2016 4:39	AMAR371.9.20160405T043914Z.wav_chan0.xml	0
05/04/2016 4:53	AMAR371.9.20160405T045341Z.wav_chan0.xml	0
05/04/2016 5:08	AMAR371.9.20160405T050808Z.wav_chan0.xml	0
05/04/2016 5:22	AMAR371.9.20160405T052235Z.wav_chan0.xml	0
05/04/2016 5:37	AMAR371.9.20160405T053702Z.wav_chan0.xml	0
05/04/2016 5:51	AMAR371.9.20160405T055129Z.wav_chan0.xml	0
05/04/2016 6:05	AMAR371.9.20160405T060556Z.wav_chan0.xml	0
05/04/2016 6:20	AMAR371.9.20160405T062023Z.wav_chan0.xml	0
05/04/2016 6:34	AMAR371.9.20160405T063450Z.wav_chan0.xml	0
05/04/2016 6:49	AMAR371.9.20160405T064917Z.wav_chan0.xml	1
05/04/2016 7:03	AMAR371.9.20160405T070344Z.wav_chan0.xml	0
05/04/2016 7:18	AMAR371.9.20160405T071811Z.wav_chan0.xml	0
05/04/2016 7:32	AMAR371.9.20160405T073238Z.wav_chan0.xml	0
05/04/2016 7:47	AMAR371.9.20160405T074705Z.wav_chan0.xml	0
05/04/2016 8:01	AMAR371.9.20160405T080132Z.wav_chan0.xml	0
05/04/2016 8:15	AMAR371.9.20160405T081559Z.wav_chan0.xml	0
05/04/2016 8:30	AMAR371.9.20160405T083026Z.wav_chan0.xml	0
05/04/2016 8:44	AMAR371.9.20160405T084453Z.wav_chan0.xml	0
05/04/2016 8:59	AMAR371.9.20160405T085920Z.wav_chan0.xml	0
05/04/2016 9:13	AMAR371.9.20160405T091347Z.wav_chan0.xml	0
05/04/2016 9:28	AMAR371.9.20160405T092814Z.wav_chan0.xml	0
05/04/2016 9:42	AMAR371.9.20160405T094241Z.wav_chan0.xml	0
05/04/2016 9:57	AMAR371.9.20160405T095708Z.wav_chan0.xml	0
05/04/2016 10:11	AMAR371.9.20160405T101135Z.wav_chan0.xml	0
05/04/2016 10:26	AMAR371.9.20160405T102602Z.wav_chan0.xml	0
05/04/2016 10:40	AMAR371.9.20160405T104029Z.wav_chan0.xml	0
05/04/2016 10:54	AMAR371.9.20160405T105456Z.wav_chan0.xml	0
05/04/2016 11:09	AMAR371.9.20160405T110923Z.wav_chan0.xml	0
05/04/2016 11:23	AMAR371.9.20160405T112350Z.wav_chan0.xml	0
05/04/2016 11:38	AMAR371.9.20160405T113817Z.wav_chan0.xml	0
05/04/2016 11:52	AMAR371.9.20160405T115244Z.wav_chan0.xml	0
05/04/2016 12:07	AMAR371.9.20160405T120711Z.wav_chan0.xml	0
05/04/2016 12:21	AMAR371.9.20160405T122138Z.wav_chan0.xml	0
05/04/2016 12:36	AMAR371.9.20160405T123605Z.wav_chan0.xml	0
05/04/2016 12:50	AMAR371.9.20160405T125032Z.wav_chan0.xml	0
05/04/2016 13:04	AMAR371.9.20160405T130459Z.wav_chan0.xml	0
05/04/2016 13:19	AMAR371.9.20160405T131926Z.wav_chan0.xml	0
05/04/2016 13:33	AMAR371.9.20160405T133353Z.wav_chan0.xml	0
05/04/2016 13:48	AMAR371.9.20160405T134820Z.wav_chan0.xml	0
05/04/2016 14:02	AMAR371.9.20160405T140247Z.wav_chan0.xml	0
05/04/2016 14:17	AMAR371.9.20160405T141714Z.wav_chan0.xml	0
05/04/2016 14:31	AMAR371.9.20160405T143141Z.wav_chan0.xml	0
05/04/2016 14:46	AMAR371.9.20160405T144608Z.wav_chan0.xml	0
05/04/2016 15:00	AMAR371.9.20160405T150035Z.wav_chan0.xml	23
05/04/2016 15:15	AMAR371.9.20160405T151502Z.wav_chan0.xml	0
05/04/2016 15:29	AMAR371.9.20160405T152929Z.wav_chan0.xml	0
05/04/2016 15:43	AMAR371.9.20160405T154356Z.wav_chan0.xml	0
05/04/2016 15:58	AMAR371.9.20160405T155823Z.wav_chan0.xml	0
05/04/2016 16:12	AMAR371.9.20160405T161250Z.wav_chan0.xml	0
05/04/2016 16:27	AMAR371.9.20160405T162717Z.wav_chan0.xml	0
05/04/2016 16:41	AMAR371.9.20160405T164144Z.wav_chan0.xml	0
05/04/2016 16:56	AMAR371.9.20160405T165611Z.wav_chan0.xml	0
05/04/2016 17:10	AMAR371.9.20160405T171038Z.wav_chan0.xml	0
05/04/2016 17:25	AMAR371.9.20160405T172505Z.wav_chan0.xml	0
05/04/2016 17:39	AMAR371.9.20160405T173932Z.wav_chan0.xml	0
05/04/2016 17:53	AMAR371.9.20160405T175359Z.wav_chan0.xml	0
05/04/2016 18:08	AMAR371.9.20160405T180826Z.wav_chan0.xml	0
05/04/2016 18:22	AMAR371.9.20160405T182253Z.wav_chan0.xml	0
05/04/2016 18:37	AMAR371.9.20160405T183720Z.wav_chan0.xml	0
05/04/2016 18:51	AMAR371.9.20160405T185147Z.wav_chan0.xml	0
05/04/2016 19:06	AMAR371.9.20160405T190614Z.wav_chan0.xml	0
05/04/2016 19:20	AMAR371.9.20160405T192041Z.wav_chan0.xml	0
05/04/2016 19:35	AMAR371.9.20160405T193508Z.wav_chan0.xml	0
05/04/2016 19:49	AMAR371.9.20160405T194935Z.wav_chan0.xml	0
05/04/2016 20:04	AMAR371.9.20160405T200402Z.wav_chan0.xml	0
05/04/2016 20:18	AMAR371.9.20160405T201829Z.wav_chan0.xml	0
05/04/2016 20:32	AMAR371.9.20160405T203256Z.wav_chan0.xml	0
05/04/2016 20:47	AMAR371.9.20160405T204723Z.wav_chan0.xml	0
05/04/2016 21:01	AMAR371.9.20160405T210150Z.wav_chan0.xml	0
05/04/2016 21:16	AMAR371.9.20160405T211617Z.wav_chan0.xml	0
05/04/2016 21:30	AMAR371.9.20160405T213044Z.wav_chan0.xml	0
05/04/2016 21:45	AMAR371.9.20160405T214511Z.wav_chan0.xml	0
05/04/2016 21:59	AMAR371.9.20160405T215938Z.wav_chan0.xml	0
05/04/2016 22:14	AMAR371.9.20160405T221405Z.wav_chan0.xml	0
05/04/2016 22:28	AMAR371.9.20160405T222832Z.wav_chan0.xml	0
05/04/2016 22:42	AMAR371.9.20160405T224259Z.wav_chan0.xml	0
05/04/2016 22:57	AMAR371.9.20160405T225726Z.wav_chan0.xml	0
05/04/2016 23:11	AMAR371.9.20160405T231153Z.wav_chan0.xml	0
05/04/2016 23:26	AMAR371.9.20160405T232620Z.wav_chan0.xml	0
05/04/2016 23:40	AMAR371.9.20160405T234047Z.wav_chan0.xml	0
05/04/2016 23:55	AMAR371.9.20160405T235514Z.wav_chan0.xml	0
06/04/2016 0:09	AMAR371.9.20160406T000941Z.wav_chan0.xml	0
06/04/2016 0:24	AMAR371.9.20160406T002408Z.wav_chan0.xml	0
06/04/2016 0:38	AMAR371.9.20160406T003835Z.wav_chan0.xml	0
06/04/2016 0:53	AMAR371.9.20160406T005302Z.wav_chan0.xml	0
06/04/2016 1:07	AMAR371.9.20160406T010729Z.wav_chan0.xml	0
06/04/2016 1:21	AMAR371.9.20160406T012156Z.wav_chan0.xml	0
06/04/2016 1:36	AMAR371.9.20160406T013623Z.wav_chan0.xml	0
06/04/2016 1:50	AMAR371.9.20160406T015050Z.wav_chan0.xml	0
06/04/2016 2:05	AMAR371.9.20160406T020517Z.wav_chan0.xml	0
06/04/2016 2:19	AMAR371.9.20160406T021944Z.wav_chan0.xml	0
06/04/2016 2:34	AMAR371.9.20160406T023411Z.wav_chan0.xml	0
06/04/2016 2:48	AMAR371.9.20160406T024838Z.wav_chan0.xml	0
06/04/2016 3:03	AMAR371.9.20160406T030305Z.wav_chan0.xml	0
06/04/2016 3:17	AMAR371.9.20160406T031732Z.wav_chan0.xml	0
06/04/2016 3:31	AMAR371.9.20160406T033159Z.wav_chan0.xml	0
06/04/2016 3:46	AMAR371.9.20160406T034626Z.wav_chan0.xml	0
06/04/2016 4:00	AMAR371.9.20160406T040053Z.wav_chan0.xml	0
06/04/2016 4:15	AMAR371.9.20160406T041520Z.wav_chan0.xml	0
06/04/2016 4:29	AMAR371.9.20160406T042947Z.wav_chan0.xml	0
06/04/2016 4:44	AMAR371.9.20160406T044414Z.wav_chan0.xml	0
06/04/2016 4:58	AMAR371.9.20160406T045841Z.wav_chan0.xml	0
06/04/2016 5:13	AMAR371.9.20160406T051308Z.wav_chan0.xml	0
06/04/2016 5:27	AMAR371.9.20160406T052735Z.wav_chan0.xml	0
06/04/2016 5:42	AMAR371.9.20160406T054202Z.wav_chan0.xml	0
06/04/2016 5:56	AMAR371.9.20160406T055629Z.wav_chan0.xml	0
06/04/2016 6:10	AMAR371.9.20160406T061056Z.wav_chan0.xml	0
06/04/2016 6:25	AMAR371.9.20160406T062523Z.wav_chan0.xml	0
06/04/2016 6:39	AMAR371.9.20160406T063950Z.wav_chan0.xml	0
06/04/2016 6:54	AMAR371.9.20160406T065417Z.wav_chan0.xml	0
06/04/2016 7:08	AMAR371.9.20160406T070844Z.wav_chan0.xml	0
06/04/2016 7:23	AMAR371.9.20160406T072311Z.wav_chan0.xml	0
06/04/2016 7:37	AMAR371.9.20160406T073738Z.wav_chan0.xml	0
06/04/2016 7:52	AMAR371.9.20160406T075205Z.wav_chan0.xml	0
06/04/2016 8:06	AMAR371.9.20160406T080632Z.wav_chan0.xml	0
06/04/2016 8:20	AMAR371.9.20160406T082059Z.wav_chan0.xml	0
06/04/2016 8:35	AMAR371.9.20160406T083526Z.wav_chan0.xml	0
06/04/2016 8:49	AMAR371.9.20160406T084953Z.wav_chan0.xml	0
06/04/2016 9:04	AMAR371.9.20160406T090420Z.wav_chan0.xml	0
06/04/2016 9:18	AMAR371.9.20160406T091847Z.wav_chan0.xml	0
06/04/2016 9:33	AMAR371.9.20160406T093314Z.wav_chan0.xml	0
06/04/2016 9:47	AMAR371.9.20160406T094741Z.wav_chan0.xml	0
06/04/2016 10:02	AMAR371.9.20160406T100208Z.wav_chan0.xml	0
06/04/2016 10:16	AMAR371.9.20160406T101635Z.wav_chan0.xml	0
06/04/2016 10:31	AMAR371.9.20160406T103102Z.wav_chan0.xml	0
06/04/2016 10:45	AMAR371.9.20160406T104529Z.wav_chan0.xml	0
06/04/2016 10:59	AMAR371.9.20160406T105956Z.wav_chan0.xml	0
06/04/2016 11:14	AMAR371.9.20160406T111423Z.wav_chan0.xml	0
06/04/2016 11:28	AMAR371.9.20160406T112850Z.wav_chan0.xml	0
06/04/2016 11:43	AMAR371.9.20160406T114317Z.wav_chan0.xml	0
06/04/2016 11:57	AMAR371.9.20160406T115744Z.wav_chan0.xml	0
06/04/2016 12:12	AMAR371.9.20160406T121211Z.wav_chan0.xml	0
06/04/2016 12:26	AMAR371.9.20160406T122638Z.wav_chan0.xml	0
06/04/2016 12:41	AMAR371.9.20160406T124105Z.wav_chan0.xml	0
06/04/2016 12:55	AMAR371.9.20160406T125532Z.wav_chan0.xml	0
06/04/2016 13:09	AMAR371.9.20160406T130959Z.wav_chan0.xml	0
06/04/2016 13:24	AMAR371.9.20160406T132426Z.wav_chan0.xml	0
06/04/2016 13:38	AMAR371.9.20160406T133853Z.wav_chan0.xml	0
06/04/2016 13:53	AMAR371.9.20160406T135320Z.wav_chan0.xml	0
06/04/2016 14:07	AMAR371.9.20160406T140747Z.wav_chan0.xml	0
06/04/2016 14:22	AMAR371.9.20160406T142214Z.wav_chan0.xml	0
06/04/2016 14:36	AMAR371.9.20160406T143641Z.wav_chan0.xml	0
06/04/2016 14:51	AMAR371.9.20160406T145108Z.wav_chan0.xml	0
06/04/2016 15:05	AMAR371.9.20160406T150535Z.wav_chan0.xml	0
06/04/2016 15:20	AMAR371.9.20160406T152002Z.wav_chan0.xml	0
06/04/2016 15:34	AMAR371.9.20160406T153429Z.wav_chan0.xml	0
06/04/2016 15:48	AMAR371.9.20160406T154856Z.wav_chan0.xml	0
06/04/2016 16:03	AMAR371.9.20160406T160323Z.wav_chan0.xml	0
06/04/2016 16:17	AMAR371.9.20160406T161750Z.wav_chan0.xml	0
06/04/2016 16:32	AMAR371.9.20160406T163217Z.wav_chan0.xml	0
06/04/2016 16:46	AMAR371.9.20160406T164644Z.wav_chan0.xml	0
06/04/2016 17:01	AMAR371.9.20160406T170111Z.wav_chan0.xml	0
06/04/2016 17:15	AMAR371.9.20160406T171538Z.wav_chan0.xml	0
06/04/2016 17:30	AMAR371.9.20160406T173005Z.wav_chan0.xml	0
06/04/2016 17:44	AMAR371.9.20160406T174432Z.wav_chan0.xml	0
06/04/2016 17:58	AMAR371.9.20160406T175859Z.wav_chan0.xml	0
06/04/2016 18:13	AMAR371.9.20160406T181326Z.wav_chan0.xml	0
06/04/2016 18:27	AMAR371.9.20160406T182753Z.wav_chan0.xml	0
06/04/2016 18:42	AMAR371.9.20160406T184220Z.wav_chan0.xml	0
06/04/2016 18:56	AMAR371.9.20160406T185647Z.wav_chan0.xml	0
06/04/2016 19:11	AMAR371.9.20160406T191114Z.wav_chan0.xml	0
06/04/2016 19:25	AMAR371.9.20160406T192541Z.wav_chan0.xml	0
06/04/2016 19:40	AMAR371.9.20160406T194008Z.wav_chan0.xml	0
06/04/2016 19:54	AMAR371.9.20160406T195435Z.wav_chan0.xml	0
06/04/2016 20:09	AMAR371.9.20160406T200902Z.wav_chan0.xml	0
06/04/2016 20:23	AMAR371.9.20160406T202329Z.wav_chan0.xml	0
06/04/2016 20:37	AMAR371.9.20160406T203756Z.wav_chan0.xml	0
06/04/2016 20:52	AMAR371.9.20160406T205223Z.wav_chan0.xml	0
06/04/2016 21:06	AMAR371.9.20160406T210650Z.wav_chan0.xml	0
06/04/2016 21:21	AMAR371.9.20160406T212117Z.wav_chan0.xml	0
06/04/2016 21:35	AMAR371.9.20160406T213544Z.wav_chan0.xml	0
06/04/2016 21:50	AMAR371.9.20160406T215011Z.wav_chan0.xml	0
06/04/2016 22:04	AMAR371.9.20160406T220438Z.wav_chan0.xml	0
06/04/2016 22:19	AMAR371.9.20160406T221905Z.wav_chan0.xml	0
06/04/2016 22:33	AMAR371.9.20160406T223332Z.wav_chan0.xml	0
06/04/2016 22:47	AMAR371.9.20160406T224759Z.wav_chan0.xml	0
06/04/2016 23:02	AMAR371.9.20160406T230226Z.wav_chan0.xml	0
06/04/2016 23:16	AMAR371.9.20160406T231653Z.wav_chan0.xml	0
06/04/2016 23:31	AMAR371.9.20160406T233120Z.wav_chan0.xml	0
06/04/2016 23:45	AMAR371.9.20160406T234547Z.wav_chan0.xml	0
07/04/2016 0:00	AMAR371.9.20160407T000014Z.wav_chan0.xml	0
07/04/2016 0:14	AMAR371.9.20160407T001441Z.wav_chan0.xml	0
07/04/2016 0:29	AMAR371.9.20160407T002908Z.wav_chan0.xml	0
07/04/2016 0:43	AMAR371.9.20160407T004335Z.wav_chan0.xml	0
07/04/2016 0:58	AMAR371.9.20160407T005802Z.wav_chan0.xml	0
07/04/2016 1:12	AMAR371.9.20160407T011229Z.wav_chan0.xml	0
07/04/2016 1:26	AMAR371.9.20160407T012656Z.wav_chan0.xml	0
07/04/2016 1:41	AMAR371.9.20160407T014123Z.wav_chan0.xml	0
07/04/2016 1:55	AMAR371.9.20160407T015550Z.wav_chan0.xml	0
07/04/2016 2:10	AMAR371.9.20160407T021017Z.wav_chan0.xml	0
07/04/2016 2:24	AMAR371.9.20160407T022444Z.wav_chan0.xml	0
07/04/2016 2:39	AMAR371.9.20160407T023911Z.wav_chan0.xml	0
07/04/2016 2:53	AMAR371.9.20160407T025338Z.wav_chan0.xml	0
07/04/2016 3:08	AMAR371.9.20160407T030805Z.wav_chan0.xml	0
07/04/2016 3:22	AMAR371.9.20160407T032232Z.wav_chan0.xml	0
07/04/2016 3:36	AMAR371.9.20160407T033659Z.wav_chan0.xml	0
07/04/2016 3:51	AMAR371.9.20160407T035126Z.wav_chan0.xml	0
07/04/2016 4:05	AMAR371.9.20160407T040553Z.wav_chan0.xml	0
07/04/2016 4:20	AMAR371.9.20160407T042020Z.wav_chan0.xml	0
07/04/2016 4:34	AMAR371.9.20160407T043447Z.wav_chan0.xml	0
07/04/2016 4:49	AMAR371.9.20160407T044914Z.wav_chan0.xml	0
07/04/2016 5:03	AMAR371.9.20160407T050341Z.wav_chan0.xml	0
07/04/2016 5:18	AMAR371.9.20160407T051808Z.wav_chan0.xml	0
07/04/2016 5:32	AMAR371.9.20160407T053235Z.wav_chan0.xml	0
07/04/2016 5:47	AMAR371.9.20160407T054702Z.wav_chan0.xml	0
07/04/2016 6:01	AMAR371.9.20160407T060129Z.wav_chan0.xml	0
07/04/2016 6:15	AMAR371.9.20160407T061556Z.wav_chan0.xml	0
07/04/2016 6:30	AMAR371.9.20160407T063023Z.wav_chan0.xml	0
07/04/2016 6:44	AMAR371.9.20160407T064450Z.wav_chan0.xml	0
07/04/2016 6:59	AMAR371.9.20160407T065917Z.wav_chan0.xml	0
07/04/2016 7:13	AMAR371.9.20160407T071344Z.wav_chan0.xml	0
07/04/2016 7:28	AMAR371.9.20160407T072811Z.wav_chan0.xml	0
07/04/2016 7:42	AMAR371.9.20160407T074238Z.wav_chan0.xml	0
07/04/2016 7:57	AMAR371.9.20160407T075705Z.wav_chan0.xml	0
07/04/2016 8:11	AMAR371.9.20160407T081132Z.wav_chan0.xml	0
07/04/2016 8:25	AMAR371.9.20160407T082559Z.wav_chan0.xml	0
07/04/2016 8:40	AMAR371.9.20160407T084026Z.wav_chan0.xml	0
07/04/2016 8:54	AMAR371.9.20160407T085453Z.wav_chan0.xml	0
07/04/2016 9:09	AMAR371.9.20160407T090920Z.wav_chan0.xml	0
07/04/2016 9:23	AMAR371.9.20160407T092347Z.wav_chan0.xml	0
07/04/2016 9:38	AMAR371.9.20160407T093814Z.wav_chan0.xml	0
07/04/2016 9:52	AMAR371.9.20160407T095241Z.wav_chan0.xml	0
07/04/2016 10:07	AMAR371.9.20160407T100708Z.wav_chan0.xml	0
07/04/2016 10:21	AMAR371.9.20160407T102135Z.wav_chan0.xml	0
07/04/2016 10:36	AMAR371.9.20160407T103602Z.wav_chan0.xml	0
07/04/2016 10:50	AMAR371.9.20160407T105029Z.wav_chan0.xml	0
07/04/2016 11:04	AMAR371.9.20160407T110456Z.wav_chan0.xml	0
07/04/2016 11:19	AMAR371.9.20160407T111923Z.wav_chan0.xml	0
07/04/2016 11:33	AMAR371.9.20160407T113350Z.wav_chan0.xml	0
07/04/2016 11:48	AMAR371.9.20160407T114817Z.wav_chan0.xml	0
07/04/2016 12:02	AMAR371.9.20160407T120244Z.wav_chan0.xml	0
07/04/2016 12:17	AMAR371.9.20160407T121711Z.wav_chan0.xml	0
07/04/2016 12:31	AMAR371.9.20160407T123138Z.wav_chan0.xml	0
07/04/2016 12:46	AMAR371.9.20160407T124605Z.wav_chan0.xml	0
07/04/2016 13:00	AMAR371.9.20160407T130032Z.wav_chan0.xml	0
07/04/2016 13:14	AMAR371.9.20160407T131459Z.wav_chan0.xml	0
07/04/2016 13:29	AMAR371.9.20160407T132926Z.wav_chan0.xml	0
07/04/2016 13:43	AMAR371.9.20160407T134353Z.wav_chan0.xml	0
07/04/2016 13:58	AMAR371.9.20160407T135820Z.wav_chan0.xml	0
07/04/2016 14:12	AMAR371.9.20160407T141247Z.wav_chan0.xml	0
07/04/2016 14:27	AMAR371.9.20160407T142714Z.wav_chan0.xml	0
07/04/2016 14:41	AMAR371.9.20160407T144141Z.wav_chan0.xml	0
07/04/2016 14:56	AMAR371.9.20160407T145608Z.wav_chan0.xml	0
07/04/2016 15:10	AMAR371.9.20160407T151035Z.wav_chan0.xml	0
07/04/2016 15:25	AMAR371.9.20160407T152502Z.wav_chan0.xml	0
07/04/2016 15:39	AMAR371.9.20160407T153929Z.wav_chan0.xml	0
07/04/2016 15:53	AMAR371.9.20160407T155356Z.wav_chan0.xml	0
07/04/2016 16:08	AMAR371.9.20160407T160823Z.wav_chan0.xml	0
07/04/2016 16:22	AMAR371.9.20160407T162250Z.wav_chan0.xml	13
07/04/2016 16:37	AMAR371.9.20160407T163717Z.wav_chan0.xml	0
07/04/2016 16:51	AMAR371.9.20160407T165144Z.wav_chan0.xml	0
07/04/2016 17:06	AMAR371.9.20160407T170611Z.wav_chan0.xml	0
07/04/2016 17:20	AMAR371.9.20160407T172038Z.wav_chan0.xml	0
07/04/2016 17:35	AMAR371.9.20160407T173505Z.wav_chan0.xml	0
07/04/2016 17:49	AMAR371.9.20160407T174932Z.wav_chan0.xml	0
07/04/2016 18:03	AMAR371.9.20160407T180359Z.wav_chan0.xml	0
07/04/2016 18:18	AMAR371.9.20160407T181826Z.wav_chan0.xml	0
07/04/2016 18:32	AMAR371.9.20160407T183253Z.wav_chan0.xml	0
07/04/2016 18:47	AMAR371.9.20160407T184720Z.wav_chan0.xml	0
07/04/2016 19:01	AMAR371.9.20160407T190147Z.wav_chan0.xml	0
07/04/2016 19:16	AMAR371.9.20160407T191614Z.wav_chan0.xml	0
07/04/2016 19:30	AMAR371.9.20160407T193041Z.wav_chan0.xml	0
07/04/2016 19:45	AMAR371.9.20160407T194508Z.wav_chan0.xml	0
07/04/2016 19:59	AMAR371.9.20160407T195935Z.wav_chan0.xml	0
07/04/2016 20:14	AMAR371.9.20160407T201402Z.wav_chan0.xml	0
07/04/2016 20:28	AMAR371.9.20160407T202829Z.wav_chan0.xml	0
07/04/2016 20:42	AMAR371.9.20160407T204256Z.wav_chan0.xml	0
07/04/2016 20:57	AMAR371.9.20160407T205723Z.wav_chan0.xml	0
07/04/2016 21:11	AMAR371.9.20160407T211150Z.wav_chan0.xml	0
07/04/2016 21:26	AMAR371.9.20160407T212617Z.wav_chan0.xml	0
07/04/2016 21:40	AMAR371.9.20160407T214044Z.wav_chan0.xml	0
07/04/2016 21:55	AMAR371.9.20160407T215511Z.wav_chan0.xml	0
07/04/2016 22:09	AMAR371.9.20160407T220938Z.wav_chan0.xml	0
07/04/2016 22:24	AMAR371.9.20160407T222405Z.wav_chan0.xml	0
07/04/2016 22:38	AMAR371.9.20160407T223832Z.wav_chan0.xml	0
07/04/2016 22:52	AMAR371.9.20160407T225259Z.wav_chan0.xml	0
07/04/2016 23:07	AMAR371.9.20160407T230726Z.wav_chan0.xml	0
07/04/2016 23:21	AMAR371.9.20160407T232153Z.wav_chan0.xml	0
07/04/2016 23:36	AMAR371.9.20160407T233620Z.wav_chan0.xml	0
07/04/2016 23:50	AMAR371.9.20160407T235047Z.wav_chan0.xml	0
08/04/2016 0:05	AMAR371.9.20160408T000514Z.wav_chan0.xml	0
08/04/2016 0:19	AMAR371.9.20160408T001941Z.wav_chan0.xml	0
08/04/2016 0:34	AMAR371.9.20160408T003408Z.wav_chan0.xml	0
08/04/2016 0:48	AMAR371.9.20160408T004835Z.wav_chan0.xml	0
08/04/2016 1:03	AMAR371.9.20160408T010302Z.wav_chan0.xml	0
08/04/2016 1:17	AMAR371.9.20160408T011729Z.wav_chan0.xml	0
08/04/2016 1:31	AMAR371.9.20160408T013156Z.wav_chan0.xml	0
08/04/2016 1:46	AMAR371.9.20160408T014623Z.wav_chan0.xml	0
08/04/2016 2:00	AMAR371.9.20160408T020050Z.wav_chan0.xml	0
08/04/2016 2:15	AMAR371.9.20160408T021517Z.wav_chan0.xml	0
08/04/2016 2:29	AMAR371.9.20160408T022944Z.wav_chan0.xml	0
08/04/2016 2:44	AMAR371.9.20160408T024411Z.wav_chan0.xml	0
08/04/2016 2:58	AMAR371.9.20160408T025838Z.wav_chan0.xml	0
08/04/2016 3:13	AMAR371.9.20160408T031305Z.wav_chan0.xml	0
08/04/2016 3:27	AMAR371.9.20160408T032732Z.wav_chan0.xml	0
08/04/2016 3:41	AMAR371.9.20160408T034159Z.wav_chan0.xml	0
08/04/2016 3:56	AMAR371.9.20160408T035626Z.wav_chan0.xml	0
08/04/2016 4:10	AMAR371.9.20160408T041053Z.wav_chan0.xml	0
08/04/2016 4:25	AMAR371.9.20160408T042520Z.wav_chan0.xml	0
08/04/2016 4:39	AMAR371.9.20160408T043947Z.wav_chan0.xml	0
08/04/2016 4:54	AMAR371.9.20160408T045414Z.wav_chan0.xml	0
08/04/2016 5:08	AMAR371.9.20160408T050841Z.wav_chan0.xml	0
08/04/2016 5:23	AMAR371.9.20160408T052308Z.wav_chan0.xml	0
08/04/2016 5:37	AMAR371.9.20160408T053735Z.wav_chan0.xml	0
08/04/2016 5:52	AMAR371.9.20160408T055202Z.wav_chan0.xml	0
08/04/2016 6:06	AMAR371.9.20160408T060629Z.wav_chan0.xml	0
08/04/2016 6:20	AMAR371.9.20160408T062056Z.wav_chan0.xml	0
08/04/2016 6:35	AMAR371.9.20160408T063523Z.wav_chan0.xml	0
08/04/2016 6:49	AMAR371.9.20160408T064950Z.wav_chan0.xml	0
08/04/2016 7:04	AMAR371.9.20160408T070417Z.wav_chan0.xml	0
08/04/2016 7:18	AMAR371.9.20160408T071844Z.wav_chan0.xml	0
08/04/2016 7:33	AMAR371.9.20160408T073311Z.wav_chan0.xml	0
08/04/2016 7:47	AMAR371.9.20160408T074738Z.wav_chan0.xml	0
08/04/2016 8:02	AMAR371.9.20160408T080205Z.wav_chan0.xml	0
08/04/2016 8:16	AMAR371.9.20160408T081632Z.wav_chan0.xml	0
08/04/2016 8:30	AMAR371.9.20160408T083059Z.wav_chan0.xml	0
08/04/2016 8:45	AMAR371.9.20160408T084526Z.wav_chan0.xml	0
08/04/2016 8:59	AMAR371.9.20160408T085953Z.wav_chan0.xml	0
08/04/2016 9:14	AMAR371.9.20160408T091420Z.wav_chan0.xml	0
08/04/2016 9:28	AMAR371.9.20160408T092847Z.wav_chan0.xml	0
08/04/2016 9:43	AMAR371.9.20160408T094314Z.wav_chan0.xml	0
08/04/2016 9:57	AMAR371.9.20160408T095741Z.wav_chan0.xml	0
08/04/2016 10:12	AMAR371.9.20160408T101208Z.wav_chan0.xml	0
08/04/2016 10:26	AMAR371.9.20160408T102635Z.wav_chan0.xml	0
08/04/2016 10:41	AMAR371.9.20160408T104102Z.wav_chan0.xml	0
08/04/2016 10:55	AMAR371.9.20160408T105529Z.wav_chan0.xml	0
08/04/2016 11:09	AMAR371.9.20160408T110956Z.wav_chan0.xml	0
08/04/2016 11:24	AMAR371.9.20160408T112423Z.wav_chan0.xml	0
08/04/2016 11:38	AMAR371.9.20160408T113850Z.wav_chan0.xml	0
08/04/2016 11:53	AMAR371.9.20160408T115317Z.wav_chan0.xml	0
08/04/2016 12:07	AMAR371.9.20160408T120744Z.wav_chan0.xml	0
08/04/2016 12:22	AMAR371.9.20160408T122211Z.wav_chan0.xml	0
08/04/2016 12:36	AMAR371.9.20160408T123638Z.wav_chan0.xml	0
08/04/2016 12:51	AMAR371.9.20160408T125105Z.wav_chan0.xml	0
08/04/2016 13:05	AMAR371.9.20160408T130532Z.wav_chan0.xml	0
08/04/2016 13:19	AMAR371.9.20160408T131959Z.wav_chan0.xml	0
08/04/2016 13:34	AMAR371.9.20160408T133426Z.wav_chan0.xml	0
08/04/2016 13:48	AMAR371.9.20160408T134853Z.wav_chan0.xml	0
08/04/2016 14:03	AMAR371.9.20160408T140320Z.wav_chan0.xml	0
08/04/2016 14:17	AMAR371.9.20160408T141747Z.wav_chan0.xml	0
08/04/2016 14:32	AMAR371.9.20160408T143214Z.wav_chan0.xml	0
08/04/2016 14:46	AMAR371.9.20160408T144641Z.wav_chan0.xml	0
08/04/2016 15:01	AMAR371.9.20160408T150108Z.wav_chan0.xml	0
08/04/2016 15:15	AMAR371.9.20160408T151535Z.wav_chan0.xml	0
08/04/2016 15:30	AMAR371.9.20160408T153002Z.wav_chan0.xml	0
08/04/2016 15:44	AMAR371.9.20160408T154429Z.wav_chan0.xml	0
08/04/2016 15:58	AMAR371.9.20160408T155856Z.wav_chan0.xml	0
08/04/2016 16:13	AMAR371.9.20160408T161323Z.wav_chan0.xml	0
08/04/2016 16:27	AMAR371.9.20160408T162750Z.wav_chan0.xml	0
08/04/2016 16:42	AMAR371.9.20160408T164217Z.wav_chan0.xml	0
08/04/2016 16:56	AMAR371.9.20160408T165644Z.wav_chan0.xml	0
08/04/2016 17:11	AMAR371.9.20160408T171111Z.wav_chan0.xml	0
08/04/2016 17:25	AMAR371.9.20160408T172538Z.wav_chan0.xml	0
08/04/2016 17:40	AMAR371.9.20160408T174005Z.wav_chan0.xml	0
08/04/2016 17:54	AMAR371.9.20160408T175432Z.wav_chan0.xml	0
08/04/2016 18:08	AMAR371.9.20160408T180859Z.wav_chan0.xml	0
08/04/2016 18:23	AMAR371.9.20160408T182326Z.wav_chan0.xml	0
08/04/2016 18:37	AMAR371.9.20160408T183753Z.wav_chan0.xml	0
08/04/2016 18:52	AMAR371.9.20160408T185220Z.wav_chan0.xml	0
08/04/2016 19:06	AMAR371.9.20160408T190647Z.wav_chan0.xml	0
08/04/2016 19:21	AMAR371.9.20160408T192114Z.wav_chan0.xml	0
08/04/2016 19:35	AMAR371.9.20160408T193541Z.wav_chan0.xml	0
08/04/2016 19:50	AMAR371.9.20160408T195008Z.wav_chan0.xml	0
08/04/2016 20:04	AMAR371.9.20160408T200435Z.wav_chan0.xml	0
08/04/2016 20:19	AMAR371.9.20160408T201902Z.wav_chan0.xml	0
08/04/2016 20:33	AMAR371.9.20160408T203329Z.wav_chan0.xml	0
08/04/2016 20:47	AMAR371.9.20160408T204756Z.wav_chan0.xml	0
08/04/2016 21:02	AMAR371.9.20160408T210223Z.wav_chan0.xml	0
08/04/2016 21:16	AMAR371.9.20160408T211650Z.wav_chan0.xml	0
08/04/2016 21:31	AMAR371.9.20160408T213117Z.wav_chan0.xml	0
08/04/2016 21:45	AMAR371.9.20160408T214544Z.wav_chan0.xml	0
08/04/2016 22:00	AMAR371.9.20160408T220011Z.wav_chan0.xml	0
08/04/2016 22:14	AMAR371.9.20160408T221438Z.wav_chan0.xml	0
08/04/2016 22:29	AMAR371.9.20160408T222905Z.wav_chan0.xml	0
08/04/2016 22:43	AMAR371.9.20160408T224332Z.wav_chan0.xml	0
08/04/2016 22:57	AMAR371.9.20160408T225759Z.wav_chan0.xml	0
08/04/2016 23:12	AMAR371.9.20160408T231226Z.wav_chan0.xml	0
08/04/2016 23:26	AMAR371.9.20160408T232653Z.wav_chan0.xml	0
08/04/2016 23:41	AMAR371.9.20160408T234120Z.wav_chan0.xml	0
08/04/2016 23:55	AMAR371.9.20160408T235547Z.wav_chan0.xml	0
09/04/2016 0:10	AMAR371.9.20160409T001014Z.wav_chan0.xml	0
09/04/2016 0:24	AMAR371.9.20160409T002441Z.wav_chan0.xml	0
09/04/2016 0:39	AMAR371.9.20160409T003908Z.wav_chan0.xml	0
09/04/2016 0:53	AMAR371.9.20160409T005335Z.wav_chan0.xml	0
09/04/2016 1:08	AMAR371.9.20160409T010802Z.wav_chan0.xml	0
09/04/2016 1:22	AMAR371.9.20160409T012229Z.wav_chan0.xml	0
09/04/2016 1:36	AMAR371.9.20160409T013656Z.wav_chan0.xml	0
09/04/2016 1:51	AMAR371.9.20160409T015123Z.wav_chan0.xml	0
09/04/2016 2:05	AMAR371.9.20160409T020550Z.wav_chan0.xml	0
09/04/2016 2:20	AMAR371.9.20160409T022017Z.wav_chan0.xml	0
09/04/2016 2:34	AMAR371.9.20160409T023444Z.wav_chan0.xml	0
09/04/2016 2:49	AMAR371.9.20160409T024911Z.wav_chan0.xml	0
09/04/2016 3:03	AMAR371.9.20160409T030338Z.wav_chan0.xml	0
09/04/2016 3:18	AMAR371.9.20160409T031805Z.wav_chan0.xml	0
09/04/2016 3:32	AMAR371.9.20160409T033232Z.wav_chan0.xml	0
09/04/2016 3:46	AMAR371.9.20160409T034659Z.wav_chan0.xml	0
09/04/2016 4:01	AMAR371.9.20160409T040126Z.wav_chan0.xml	0
09/04/2016 4:15	AMAR371.9.20160409T041553Z.wav_chan0.xml	0
09/04/2016 4:30	AMAR371.9.20160409T043020Z.wav_chan0.xml	0
09/04/2016 4:44	AMAR371.9.20160409T044447Z.wav_chan0.xml	0
09/04/2016 4:59	AMAR371.9.20160409T045914Z.wav_chan0.xml	0
09/04/2016 5:13	AMAR371.9.20160409T051341Z.wav_chan0.xml	0
09/04/2016 5:28	AMAR371.9.20160409T052808Z.wav_chan0.xml	0
09/04/2016 5:42	AMAR371.9.20160409T054235Z.wav_chan0.xml	0
09/04/2016 5:57	AMAR371.9.20160409T055702Z.wav_chan0.xml	0
09/04/2016 6:11	AMAR371.9.20160409T061129Z.wav_chan0.xml	0
09/04/2016 6:25	AMAR371.9.20160409T062556Z.wav_chan0.xml	0
09/04/2016 6:40	AMAR371.9.20160409T064023Z.wav_chan0.xml	0
09/04/2016 6:54	AMAR371.9.20160409T065450Z.wav_chan0.xml	0
09/04/2016 7:09	AMAR371.9.20160409T070917Z.wav_chan0.xml	0
09/04/2016 7:23	AMAR371.9.20160409T072344Z.wav_chan0.xml	0
09/04/2016 7:38	AMAR371.9.20160409T073811Z.wav_chan0.xml	0
09/04/2016 7:52	AMAR371.9.20160409T075238Z.wav_chan0.xml	0
09/04/2016 8:07	AMAR371.9.20160409T080705Z.wav_chan0.xml	1
09/04/2016 8:21	AMAR371.9.20160409T082132Z.wav_chan0.xml	0
09/04/2016 8:35	AMAR371.9.20160409T083559Z.wav_chan0.xml	0
09/04/2016 8:50	AMAR371.9.20160409T085026Z.wav_chan0.xml	0
09/04/2016 9:04	AMAR371.9.20160409T090453Z.wav_chan0.xml	0
09/04/2016 9:19	AMAR371.9.20160409T091920Z.wav_chan0.xml	0
09/04/2016 9:33	AMAR371.9.20160409T093347Z.wav_chan0.xml	0
09/04/2016 9:48	AMAR371.9.20160409T094814Z.wav_chan0.xml	0
09/04/2016 10:02	AMAR371.9.20160409T100241Z.wav_chan0.xml	0
09/04/2016 10:17	AMAR371.9.20160409T101708Z.wav_chan0.xml	0
09/04/2016 10:31	AMAR371.9.20160409T103135Z.wav_chan0.xml	0
09/04/2016 10:46	AMAR371.9.20160409T104602Z.wav_chan0.xml	0
09/04/2016 11:00	AMAR371.9.20160409T110029Z.wav_chan0.xml	0
09/04/2016 11:14	AMAR371.9.20160409T111456Z.wav_chan0.xml	0
09/04/2016 11:29	AMAR371.9.20160409T112923Z.wav_chan0.xml	0
09/04/2016 11:43	AMAR371.9.20160409T114350Z.wav_chan0.xml	0
09/04/2016 11:58	AMAR371.9.20160409T115817Z.wav_chan0.xml	0
09/04/2016 12:12	AMAR371.9.20160409T121244Z.wav_chan0.xml	0
09/04/2016 12:27	AMAR371.9.20160409T122711Z.wav_chan0.xml	0
09/04/2016 12:41	AMAR371.9.20160409T124138Z.wav_chan0.xml	0
09/04/2016 12:56	AMAR371.9.20160409T125605Z.wav_chan0.xml	0
09/04/2016 13:10	AMAR371.9.20160409T131032Z.wav_chan0.xml	0
09/04/2016 13:24	AMAR371.9.20160409T132459Z.wav_chan0.xml	0
09/04/2016 13:39	AMAR371.9.20160409T133926Z.wav_chan0.xml	0
09/04/2016 13:53	AMAR371.9.20160409T135353Z.wav_chan0.xml	0
09/04/2016 14:08	AMAR371.9.20160409T140820Z.wav_chan0.xml	0
09/04/2016 14:22	AMAR371.9.20160409T142247Z.wav_chan0.xml	0
09/04/2016 14:37	AMAR371.9.20160409T143714Z.wav_chan0.xml	0
09/04/2016 14:51	AMAR371.9.20160409T145141Z.wav_chan0.xml	0
09/04/2016 15:06	AMAR371.9.20160409T150608Z.wav_chan0.xml	0
09/04/2016 15:20	AMAR371.9.20160409T152035Z.wav_chan0.xml	0
09/04/2016 15:35	AMAR371.9.20160409T153502Z.wav_chan0.xml	0
09/04/2016 15:49	AMAR371.9.20160409T154929Z.wav_chan0.xml	0
09/04/2016 16:03	AMAR371.9.20160409T160356Z.wav_chan0.xml	0
09/04/2016 16:18	AMAR371.9.20160409T161823Z.wav_chan0.xml	0
09/04/2016 16:32	AMAR371.9.20160409T163250Z.wav_chan0.xml	0
09/04/2016 16:47	AMAR371.9.20160409T164717Z.wav_chan0.xml	0
09/04/2016 17:01	AMAR371.9.20160409T170144Z.wav_chan0.xml	0
09/04/2016 17:16	AMAR371.9.20160409T171611Z.wav_chan0.xml	0
09/04/2016 17:30	AMAR371.9.20160409T173038Z.wav_chan0.xml	0
09/04/2016 17:45	AMAR371.9.20160409T174505Z.wav_chan0.xml	0
09/04/2016 17:59	AMAR371.9.20160409T175932Z.wav_chan0.xml	0
09/04/2016 18:13	AMAR371.9.20160409T181359Z.wav_chan0.xml	0
09/04/2016 18:28	AMAR371.9.20160409T182826Z.wav_chan0.xml	0
09/04/2016 18:42	AMAR371.9.20160409T184253Z.wav_chan0.xml	0
09/04/2016 18:57	AMAR371.9.20160409T185720Z.wav_chan0.xml	0
09/04/2016 19:11	AMAR371.9.20160409T191147Z.wav_chan0.xml	0
09/04/2016 19:26	AMAR371.9.20160409T192614Z.wav_chan0.xml	0
09/04/2016 19:40	AMAR371.9.20160409T194041Z.wav_chan0.xml	0
09/04/2016 19:55	AMAR371.9.20160409T195508Z.wav_chan0.xml	0
09/04/2016 20:09	AMAR371.9.20160409T200935Z.wav_chan0.xml	0
09/04/2016 20:24	AMAR371.9.20160409T202402Z.wav_chan0.xml	0
09/04/2016 20:38	AMAR371.9.20160409T203829Z.wav_chan0.xml	0
09/04/2016 20:52	AMAR371.9.20160409T205256Z.wav_chan0.xml	0
09/04/2016 21:07	AMAR371.9.20160409T210723Z.wav_chan0.xml	0
09/04/2016 21:21	AMAR371.9.20160409T212150Z.wav_chan0.xml	0
09/04/2016 21:36	AMAR371.9.20160409T213617Z.wav_chan0.xml	0
09/04/2016 21:50	AMAR371.9.20160409T215044Z.wav_chan0.xml	0
09/04/2016 22:05	AMAR371.9.20160409T220511Z.wav_chan0.xml	0
09/04/2016 22:19	AMAR371.9.20160409T221938Z.wav_chan0.xml	0
09/04/2016 22:34	AMAR371.9.20160409T223405Z.wav_chan0.xml	0
09/04/2016 22:48	AMAR371.9.20160409T224832Z.wav_chan0.xml	0
09/04/2016 23:02	AMAR371.9.20160409T230259Z.wav_chan0.xml	0
09/04/2016 23:17	AMAR371.9.20160409T231726Z.wav_chan0.xml	0
09/04/2016 23:31	AMAR371.9.20160409T233153Z.wav_chan0.xml	0
09/04/2016 23:46	AMAR371.9.20160409T234620Z.wav_chan0.xml	0
10/04/2016 0:00	AMAR371.9.20160410T000047Z.wav_chan0.xml	0
10/04/2016 0:15	AMAR371.9.20160410T001514Z.wav_chan0.xml	0
10/04/2016 0:29	AMAR371.9.20160410T002941Z.wav_chan0.xml	0
10/04/2016 0:44	AMAR371.9.20160410T004408Z.wav_chan0.xml	0
10/04/2016 0:58	AMAR371.9.20160410T005835Z.wav_chan0.xml	0
10/04/2016 1:13	AMAR371.9.20160410T011302Z.wav_chan0.xml	0
10/04/2016 1:27	AMAR371.9.20160410T012729Z.wav_chan0.xml	0
10/04/2016 1:41	AMAR371.9.20160410T014156Z.wav_chan0.xml	0
10/04/2016 1:56	AMAR371.9.20160410T015623Z.wav_chan0.xml	0
10/04/2016 2:10	AMAR371.9.20160410T021050Z.wav_chan0.xml	0
10/04/2016 2:25	AMAR371.9.20160410T022517Z.wav_chan0.xml	0
10/04/2016 2:39	AMAR371.9.20160410T023944Z.wav_chan0.xml	0
10/04/2016 2:54	AMAR371.9.20160410T025411Z.wav_chan0.xml	0
10/04/2016 3:08	AMAR371.9.20160410T030838Z.wav_chan0.xml	0
10/04/2016 3:23	AMAR371.9.20160410T032305Z.wav_chan0.xml	0
10/04/2016 3:37	AMAR371.9.20160410T033732Z.wav_chan0.xml	0
10/04/2016 3:51	AMAR371.9.20160410T035159Z.wav_chan0.xml	0
10/04/2016 4:06	AMAR371.9.20160410T040626Z.wav_chan0.xml	0
10/04/2016 4:20	AMAR371.9.20160410T042053Z.wav_chan0.xml	0
10/04/2016 4:35	AMAR371.9.20160410T043520Z.wav_chan0.xml	0
10/04/2016 4:49	AMAR371.9.20160410T044947Z.wav_chan0.xml	0
10/04/2016 5:04	AMAR371.9.20160410T050414Z.wav_chan0.xml	0
10/04/2016 5:18	AMAR371.9.20160410T051841Z.wav_chan0.xml	0
10/04/2016 5:33	AMAR371.9.20160410T053308Z.wav_chan0.xml	0
10/04/2016 5:47	AMAR371.9.20160410T054735Z.wav_chan0.xml	0
10/04/2016 6:02	AMAR371.9.20160410T060202Z.wav_chan0.xml	1
10/04/2016 6:16	AMAR371.9.20160410T061629Z.wav_chan0.xml	0
10/04/2016 6:30	AMAR371.9.20160410T063056Z.wav_chan0.xml	0
10/04/2016 6:45	AMAR371.9.20160410T064523Z.wav_chan0.xml	0
10/04/2016 6:59	AMAR371.9.20160410T065950Z.wav_chan0.xml	0
10/04/2016 7:14	AMAR371.9.20160410T071417Z.wav_chan0.xml	0
10/04/2016 7:28	AMAR371.9.20160410T072844Z.wav_chan0.xml	0
10/04/2016 7:43	AMAR371.9.20160410T074311Z.wav_chan0.xml	0
10/04/2016 7:57	AMAR371.9.20160410T075738Z.wav_chan0.xml	0
10/04/2016 8:12	AMAR371.9.20160410T081205Z.wav_chan0.xml	0
10/04/2016 8:26	AMAR371.9.20160410T082632Z.wav_chan0.xml	0
10/04/2016 8:40	AMAR371.9.20160410T084059Z.wav_chan0.xml	0
10/04/2016 8:55	AMAR371.9.20160410T085526Z.wav_chan0.xml	0
10/04/2016 9:09	AMAR371.9.20160410T090953Z.wav_chan0.xml	0
[truncated: 9,085 more rows]
