# Supplementary material for: Signals from the deep: Spatial and temporal acoustic occurrence of beaked whales off western Ireland
Source: PLoS One. 2018 Jun 21;13(6):e0199431. doi: 10.1371/journal.pone.0199431 (PMC6013249; doi:10.1371/journal.pone.0199431)
Supplement: S30 Dataset — (CSV) [file pone.0199431.s030.csv]

Time	File	Sowerbys
19/03/2016 10:05	AMAR382.9.20160319T100532Z.wav_chan0.xml	0
19/03/2016 10:19	AMAR382.9.20160319T101959Z.wav_chan0.xml	0
19/03/2016 10:34	AMAR382.9.20160319T103426Z.wav_chan0.xml	0
19/03/2016 10:48	AMAR382.9.20160319T104853Z.wav_chan0.xml	0
19/03/2016 11:03	AMAR382.9.20160319T110320Z.wav_chan0.xml	0
19/03/2016 11:17	AMAR382.9.20160319T111747Z.wav_chan0.xml	0
19/03/2016 11:32	AMAR382.9.20160319T113214Z.wav_chan0.xml	0
19/03/2016 11:46	AMAR382.9.20160319T114641Z.wav_chan0.xml	0
19/03/2016 12:01	AMAR382.9.20160319T120108Z.wav_chan0.xml	0
19/03/2016 12:15	AMAR382.9.20160319T121535Z.wav_chan0.xml	0
19/03/2016 12:30	AMAR382.9.20160319T123002Z.wav_chan0.xml	0
19/03/2016 12:44	AMAR382.9.20160319T124429Z.wav_chan0.xml	0
19/03/2016 12:58	AMAR382.9.20160319T125856Z.wav_chan0.xml	0
19/03/2016 13:13	AMAR382.9.20160319T131323Z.wav_chan0.xml	0
19/03/2016 13:27	AMAR382.9.20160319T132750Z.wav_chan0.xml	0
19/03/2016 13:42	AMAR382.9.20160319T134217Z.wav_chan0.xml	0
19/03/2016 13:56	AMAR382.9.20160319T135644Z.wav_chan0.xml	0
19/03/2016 14:11	AMAR382.9.20160319T141111Z.wav_chan0.xml	0
19/03/2016 14:25	AMAR382.9.20160319T142538Z.wav_chan0.xml	0
19/03/2016 14:40	AMAR382.9.20160319T144005Z.wav_chan0.xml	0
19/03/2016 14:54	AMAR382.9.20160319T145432Z.wav_chan0.xml	0
19/03/2016 15:08	AMAR382.9.20160319T150859Z.wav_chan0.xml	0
19/03/2016 15:23	AMAR382.9.20160319T152326Z.wav_chan0.xml	0
19/03/2016 15:37	AMAR382.9.20160319T153753Z.wav_chan0.xml	0
19/03/2016 15:52	AMAR382.9.20160319T155220Z.wav_chan0.xml	0
19/03/2016 16:06	AMAR382.9.20160319T160647Z.wav_chan0.xml	0
19/03/2016 16:21	AMAR382.9.20160319T162114Z.wav_chan0.xml	0
19/03/2016 16:35	AMAR382.9.20160319T163541Z.wav_chan0.xml	0
19/03/2016 16:50	AMAR382.9.20160319T165008Z.wav_chan0.xml	0
19/03/2016 17:04	AMAR382.9.20160319T170435Z.wav_chan0.xml	0
19/03/2016 17:19	AMAR382.9.20160319T171902Z.wav_chan0.xml	0
19/03/2016 17:33	AMAR382.9.20160319T173329Z.wav_chan0.xml	0
19/03/2016 17:47	AMAR382.9.20160319T174756Z.wav_chan0.xml	0
19/03/2016 18:02	AMAR382.9.20160319T180223Z.wav_chan0.xml	0
19/03/2016 18:16	AMAR382.9.20160319T181650Z.wav_chan0.xml	0
19/03/2016 18:31	AMAR382.9.20160319T183117Z.wav_chan0.xml	0
19/03/2016 18:45	AMAR382.9.20160319T184544Z.wav_chan0.xml	0
19/03/2016 19:00	AMAR382.9.20160319T190011Z.wav_chan0.xml	0
19/03/2016 19:14	AMAR382.9.20160319T191438Z.wav_chan0.xml	0
19/03/2016 19:29	AMAR382.9.20160319T192905Z.wav_chan0.xml	0
19/03/2016 19:43	AMAR382.9.20160319T194332Z.wav_chan0.xml	0
19/03/2016 19:57	AMAR382.9.20160319T195759Z.wav_chan0.xml	0
19/03/2016 20:12	AMAR382.9.20160319T201226Z.wav_chan0.xml	0
19/03/2016 20:26	AMAR382.9.20160319T202653Z.wav_chan0.xml	0
19/03/2016 20:41	AMAR382.9.20160319T204120Z.wav_chan0.xml	0
19/03/2016 20:55	AMAR382.9.20160319T205547Z.wav_chan0.xml	0
19/03/2016 21:10	AMAR382.9.20160319T211014Z.wav_chan0.xml	0
19/03/2016 21:24	AMAR382.9.20160319T212441Z.wav_chan0.xml	0
19/03/2016 21:39	AMAR382.9.20160319T213908Z.wav_chan0.xml	0
19/03/2016 21:53	AMAR382.9.20160319T215335Z.wav_chan0.xml	0
19/03/2016 22:08	AMAR382.9.20160319T220802Z.wav_chan0.xml	0
19/03/2016 22:22	AMAR382.9.20160319T222229Z.wav_chan0.xml	0
19/03/2016 22:36	AMAR382.9.20160319T223656Z.wav_chan0.xml	0
19/03/2016 22:51	AMAR382.9.20160319T225123Z.wav_chan0.xml	0
19/03/2016 23:05	AMAR382.9.20160319T230550Z.wav_chan0.xml	0
19/03/2016 23:20	AMAR382.9.20160319T232017Z.wav_chan0.xml	0
19/03/2016 23:34	AMAR382.9.20160319T233444Z.wav_chan0.xml	0
19/03/2016 23:49	AMAR382.9.20160319T234911Z.wav_chan0.xml	0
20/03/2016 0:03	AMAR382.9.20160320T000338Z.wav_chan0.xml	0
20/03/2016 0:18	AMAR382.9.20160320T001805Z.wav_chan0.xml	0
20/03/2016 0:32	AMAR382.9.20160320T003232Z.wav_chan0.xml	0
20/03/2016 0:46	AMAR382.9.20160320T004659Z.wav_chan0.xml	0
20/03/2016 1:01	AMAR382.9.20160320T010126Z.wav_chan0.xml	0
20/03/2016 1:15	AMAR382.9.20160320T011553Z.wav_chan0.xml	0
20/03/2016 1:30	AMAR382.9.20160320T013020Z.wav_chan0.xml	0
20/03/2016 1:44	AMAR382.9.20160320T014447Z.wav_chan0.xml	0
20/03/2016 1:59	AMAR382.9.20160320T015914Z.wav_chan0.xml	0
20/03/2016 2:13	AMAR382.9.20160320T021341Z.wav_chan0.xml	0
20/03/2016 2:28	AMAR382.9.20160320T022808Z.wav_chan0.xml	0
20/03/2016 2:42	AMAR382.9.20160320T024235Z.wav_chan0.xml	0
20/03/2016 2:57	AMAR382.9.20160320T025702Z.wav_chan0.xml	0
20/03/2016 3:11	AMAR382.9.20160320T031129Z.wav_chan0.xml	0
20/03/2016 3:25	AMAR382.9.20160320T032556Z.wav_chan0.xml	0
20/03/2016 3:40	AMAR382.9.20160320T034023Z.wav_chan0.xml	0
20/03/2016 3:54	AMAR382.9.20160320T035450Z.wav_chan0.xml	0
20/03/2016 4:09	AMAR382.9.20160320T040917Z.wav_chan0.xml	0
20/03/2016 4:23	AMAR382.9.20160320T042344Z.wav_chan0.xml	0
20/03/2016 4:38	AMAR382.9.20160320T043811Z.wav_chan0.xml	0
20/03/2016 4:52	AMAR382.9.20160320T045238Z.wav_chan0.xml	0
20/03/2016 5:07	AMAR382.9.20160320T050705Z.wav_chan0.xml	0
20/03/2016 5:21	AMAR382.9.20160320T052132Z.wav_chan0.xml	0
20/03/2016 5:35	AMAR382.9.20160320T053559Z.wav_chan0.xml	0
20/03/2016 5:50	AMAR382.9.20160320T055026Z.wav_chan0.xml	0
20/03/2016 6:04	AMAR382.9.20160320T060453Z.wav_chan0.xml	0
20/03/2016 6:19	AMAR382.9.20160320T061920Z.wav_chan0.xml	0
20/03/2016 6:33	AMAR382.9.20160320T063347Z.wav_chan0.xml	0
20/03/2016 6:48	AMAR382.9.20160320T064814Z.wav_chan0.xml	0
20/03/2016 7:02	AMAR382.9.20160320T070241Z.wav_chan0.xml	0
20/03/2016 7:17	AMAR382.9.20160320T071708Z.wav_chan0.xml	0
20/03/2016 7:31	AMAR382.9.20160320T073135Z.wav_chan0.xml	0
20/03/2016 7:46	AMAR382.9.20160320T074602Z.wav_chan0.xml	0
20/03/2016 8:00	AMAR382.9.20160320T080029Z.wav_chan0.xml	0
20/03/2016 8:14	AMAR382.9.20160320T081456Z.wav_chan0.xml	0
20/03/2016 8:29	AMAR382.9.20160320T082923Z.wav_chan0.xml	0
20/03/2016 8:43	AMAR382.9.20160320T084350Z.wav_chan0.xml	0
20/03/2016 8:58	AMAR382.9.20160320T085817Z.wav_chan0.xml	0
20/03/2016 9:12	AMAR382.9.20160320T091244Z.wav_chan0.xml	0
20/03/2016 9:27	AMAR382.9.20160320T092711Z.wav_chan0.xml	0
20/03/2016 9:41	AMAR382.9.20160320T094138Z.wav_chan0.xml	0
20/03/2016 9:56	AMAR382.9.20160320T095605Z.wav_chan0.xml	0
20/03/2016 10:10	AMAR382.9.20160320T101032Z.wav_chan0.xml	0
20/03/2016 10:24	AMAR382.9.20160320T102459Z.wav_chan0.xml	0
20/03/2016 10:39	AMAR382.9.20160320T103926Z.wav_chan0.xml	0
20/03/2016 10:53	AMAR382.9.20160320T105353Z.wav_chan0.xml	0
20/03/2016 11:08	AMAR382.9.20160320T110820Z.wav_chan0.xml	0
20/03/2016 11:22	AMAR382.9.20160320T112247Z.wav_chan0.xml	0
20/03/2016 11:37	AMAR382.9.20160320T113714Z.wav_chan0.xml	0
20/03/2016 11:51	AMAR382.9.20160320T115141Z.wav_chan0.xml	0
20/03/2016 12:06	AMAR382.9.20160320T120608Z.wav_chan0.xml	0
20/03/2016 12:20	AMAR382.9.20160320T122035Z.wav_chan0.xml	0
20/03/2016 12:35	AMAR382.9.20160320T123502Z.wav_chan0.xml	0
20/03/2016 12:49	AMAR382.9.20160320T124929Z.wav_chan0.xml	0
20/03/2016 13:03	AMAR382.9.20160320T130356Z.wav_chan0.xml	0
20/03/2016 13:18	AMAR382.9.20160320T131823Z.wav_chan0.xml	0
20/03/2016 13:32	AMAR382.9.20160320T133250Z.wav_chan0.xml	0
20/03/2016 13:47	AMAR382.9.20160320T134717Z.wav_chan0.xml	0
20/03/2016 14:01	AMAR382.9.20160320T140144Z.wav_chan0.xml	0
20/03/2016 14:16	AMAR382.9.20160320T141611Z.wav_chan0.xml	0
20/03/2016 14:30	AMAR382.9.20160320T143038Z.wav_chan0.xml	0
20/03/2016 14:45	AMAR382.9.20160320T144505Z.wav_chan0.xml	0
20/03/2016 14:59	AMAR382.9.20160320T145932Z.wav_chan0.xml	0
20/03/2016 15:13	AMAR382.9.20160320T151359Z.wav_chan0.xml	0
20/03/2016 15:28	AMAR382.9.20160320T152826Z.wav_chan0.xml	0
20/03/2016 15:42	AMAR382.9.20160320T154253Z.wav_chan0.xml	0
20/03/2016 15:57	AMAR382.9.20160320T155720Z.wav_chan0.xml	0
20/03/2016 16:11	AMAR382.9.20160320T161147Z.wav_chan0.xml	0
20/03/2016 16:26	AMAR382.9.20160320T162614Z.wav_chan0.xml	0
20/03/2016 16:40	AMAR382.9.20160320T164041Z.wav_chan0.xml	0
20/03/2016 16:55	AMAR382.9.20160320T165508Z.wav_chan0.xml	0
20/03/2016 17:09	AMAR382.9.20160320T170935Z.wav_chan0.xml	0
20/03/2016 17:24	AMAR382.9.20160320T172402Z.wav_chan0.xml	0
20/03/2016 17:38	AMAR382.9.20160320T173829Z.wav_chan0.xml	0
20/03/2016 17:52	AMAR382.9.20160320T175256Z.wav_chan0.xml	0
20/03/2016 18:07	AMAR382.9.20160320T180723Z.wav_chan0.xml	0
20/03/2016 18:21	AMAR382.9.20160320T182150Z.wav_chan0.xml	0
20/03/2016 18:36	AMAR382.9.20160320T183617Z.wav_chan0.xml	0
20/03/2016 18:50	AMAR382.9.20160320T185044Z.wav_chan0.xml	0
20/03/2016 19:05	AMAR382.9.20160320T190511Z.wav_chan0.xml	0
20/03/2016 19:19	AMAR382.9.20160320T191938Z.wav_chan0.xml	0
20/03/2016 19:34	AMAR382.9.20160320T193405Z.wav_chan0.xml	0
20/03/2016 19:48	AMAR382.9.20160320T194832Z.wav_chan0.xml	0
20/03/2016 20:02	AMAR382.9.20160320T200259Z.wav_chan0.xml	0
20/03/2016 20:17	AMAR382.9.20160320T201726Z.wav_chan0.xml	0
20/03/2016 20:31	AMAR382.9.20160320T203153Z.wav_chan0.xml	0
20/03/2016 20:46	AMAR382.9.20160320T204620Z.wav_chan0.xml	0
20/03/2016 21:00	AMAR382.9.20160320T210047Z.wav_chan0.xml	0
20/03/2016 21:15	AMAR382.9.20160320T211514Z.wav_chan0.xml	0
20/03/2016 21:29	AMAR382.9.20160320T212941Z.wav_chan0.xml	0
20/03/2016 21:44	AMAR382.9.20160320T214408Z.wav_chan0.xml	0
20/03/2016 21:58	AMAR382.9.20160320T215835Z.wav_chan0.xml	0
20/03/2016 22:13	AMAR382.9.20160320T221302Z.wav_chan0.xml	0
20/03/2016 22:27	AMAR382.9.20160320T222729Z.wav_chan0.xml	0
20/03/2016 22:41	AMAR382.9.20160320T224156Z.wav_chan0.xml	0
20/03/2016 22:56	AMAR382.9.20160320T225623Z.wav_chan0.xml	0
20/03/2016 23:10	AMAR382.9.20160320T231050Z.wav_chan0.xml	0
20/03/2016 23:25	AMAR382.9.20160320T232517Z.wav_chan0.xml	0
20/03/2016 23:39	AMAR382.9.20160320T233944Z.wav_chan0.xml	0
20/03/2016 23:54	AMAR382.9.20160320T235411Z.wav_chan0.xml	0
21/03/2016 0:08	AMAR382.9.20160321T000838Z.wav_chan0.xml	0
21/03/2016 0:23	AMAR382.9.20160321T002305Z.wav_chan0.xml	0
21/03/2016 0:37	AMAR382.9.20160321T003732Z.wav_chan0.xml	0
21/03/2016 0:51	AMAR382.9.20160321T005159Z.wav_chan0.xml	0
21/03/2016 1:06	AMAR382.9.20160321T010626Z.wav_chan0.xml	0
21/03/2016 1:20	AMAR382.9.20160321T012053Z.wav_chan0.xml	0
21/03/2016 1:35	AMAR382.9.20160321T013520Z.wav_chan0.xml	0
21/03/2016 1:49	AMAR382.9.20160321T014947Z.wav_chan0.xml	0
21/03/2016 2:04	AMAR382.9.20160321T020414Z.wav_chan0.xml	0
21/03/2016 2:18	AMAR382.9.20160321T021841Z.wav_chan0.xml	0
21/03/2016 2:33	AMAR382.9.20160321T023308Z.wav_chan0.xml	0
21/03/2016 2:47	AMAR382.9.20160321T024735Z.wav_chan0.xml	0
21/03/2016 3:02	AMAR382.9.20160321T030202Z.wav_chan0.xml	0
21/03/2016 3:16	AMAR382.9.20160321T031629Z.wav_chan0.xml	0
21/03/2016 3:30	AMAR382.9.20160321T033056Z.wav_chan0.xml	0
21/03/2016 3:45	AMAR382.9.20160321T034523Z.wav_chan0.xml	0
21/03/2016 3:59	AMAR382.9.20160321T035950Z.wav_chan0.xml	0
21/03/2016 4:14	AMAR382.9.20160321T041417Z.wav_chan0.xml	0
21/03/2016 4:28	AMAR382.9.20160321T042844Z.wav_chan0.xml	0
21/03/2016 4:43	AMAR382.9.20160321T044311Z.wav_chan0.xml	0
21/03/2016 4:57	AMAR382.9.20160321T045738Z.wav_chan0.xml	0
21/03/2016 5:12	AMAR382.9.20160321T051205Z.wav_chan0.xml	0
21/03/2016 5:26	AMAR382.9.20160321T052632Z.wav_chan0.xml	0
21/03/2016 5:40	AMAR382.9.20160321T054059Z.wav_chan0.xml	0
21/03/2016 5:55	AMAR382.9.20160321T055526Z.wav_chan0.xml	0
21/03/2016 6:09	AMAR382.9.20160321T060953Z.wav_chan0.xml	0
21/03/2016 6:24	AMAR382.9.20160321T062420Z.wav_chan0.xml	0
21/03/2016 6:38	AMAR382.9.20160321T063847Z.wav_chan0.xml	0
21/03/2016 6:53	AMAR382.9.20160321T065314Z.wav_chan0.xml	0
21/03/2016 7:07	AMAR382.9.20160321T070741Z.wav_chan0.xml	0
21/03/2016 7:22	AMAR382.9.20160321T072208Z.wav_chan0.xml	0
21/03/2016 7:36	AMAR382.9.20160321T073635Z.wav_chan0.xml	0
21/03/2016 7:51	AMAR382.9.20160321T075102Z.wav_chan0.xml	0
21/03/2016 8:05	AMAR382.9.20160321T080529Z.wav_chan0.xml	0
21/03/2016 8:19	AMAR382.9.20160321T081956Z.wav_chan0.xml	0
21/03/2016 8:34	AMAR382.9.20160321T083423Z.wav_chan0.xml	0
21/03/2016 8:48	AMAR382.9.20160321T084850Z.wav_chan0.xml	0
21/03/2016 9:03	AMAR382.9.20160321T090317Z.wav_chan0.xml	0
21/03/2016 9:17	AMAR382.9.20160321T091744Z.wav_chan0.xml	0
21/03/2016 9:32	AMAR382.9.20160321T093211Z.wav_chan0.xml	0
21/03/2016 9:46	AMAR382.9.20160321T094638Z.wav_chan0.xml	0
21/03/2016 10:01	AMAR382.9.20160321T100105Z.wav_chan0.xml	0
21/03/2016 10:15	AMAR382.9.20160321T101532Z.wav_chan0.xml	0
21/03/2016 10:29	AMAR382.9.20160321T102959Z.wav_chan0.xml	0
21/03/2016 10:44	AMAR382.9.20160321T104426Z.wav_chan0.xml	0
21/03/2016 10:58	AMAR382.9.20160321T105853Z.wav_chan0.xml	0
21/03/2016 11:13	AMAR382.9.20160321T111320Z.wav_chan0.xml	0
21/03/2016 11:27	AMAR382.9.20160321T112747Z.wav_chan0.xml	0
21/03/2016 11:42	AMAR382.9.20160321T114214Z.wav_chan0.xml	0
21/03/2016 11:56	AMAR382.9.20160321T115641Z.wav_chan0.xml	0
21/03/2016 12:11	AMAR382.9.20160321T121108Z.wav_chan0.xml	0
21/03/2016 12:25	AMAR382.9.20160321T122535Z.wav_chan0.xml	0
21/03/2016 12:40	AMAR382.9.20160321T124002Z.wav_chan0.xml	0
21/03/2016 12:54	AMAR382.9.20160321T125429Z.wav_chan0.xml	0
21/03/2016 13:08	AMAR382.9.20160321T130856Z.wav_chan0.xml	0
21/03/2016 13:23	AMAR382.9.20160321T132323Z.wav_chan0.xml	0
21/03/2016 13:37	AMAR382.9.20160321T133750Z.wav_chan0.xml	0
21/03/2016 13:52	AMAR382.9.20160321T135217Z.wav_chan0.xml	0
21/03/2016 14:06	AMAR382.9.20160321T140644Z.wav_chan0.xml	0
21/03/2016 14:21	AMAR382.9.20160321T142111Z.wav_chan0.xml	0
21/03/2016 14:35	AMAR382.9.20160321T143538Z.wav_chan0.xml	0
21/03/2016 14:50	AMAR382.9.20160321T145005Z.wav_chan0.xml	0
21/03/2016 15:04	AMAR382.9.20160321T150432Z.wav_chan0.xml	0
21/03/2016 15:18	AMAR382.9.20160321T151859Z.wav_chan0.xml	0
21/03/2016 15:33	AMAR382.9.20160321T153326Z.wav_chan0.xml	0
21/03/2016 15:47	AMAR382.9.20160321T154753Z.wav_chan0.xml	0
21/03/2016 16:02	AMAR382.9.20160321T160220Z.wav_chan0.xml	0
21/03/2016 16:16	AMAR382.9.20160321T161647Z.wav_chan0.xml	0
21/03/2016 16:31	AMAR382.9.20160321T163114Z.wav_chan0.xml	0
21/03/2016 16:45	AMAR382.9.20160321T164541Z.wav_chan0.xml	0
21/03/2016 17:00	AMAR382.9.20160321T170008Z.wav_chan0.xml	0
21/03/2016 17:14	AMAR382.9.20160321T171435Z.wav_chan0.xml	0
21/03/2016 17:29	AMAR382.9.20160321T172902Z.wav_chan0.xml	0
21/03/2016 17:57	AMAR382.9.20160321T175756Z.wav_chan0.xml	0
21/03/2016 18:12	AMAR382.9.20160321T181223Z.wav_chan0.xml	0
21/03/2016 18:26	AMAR382.9.20160321T182650Z.wav_chan0.xml	0
21/03/2016 18:41	AMAR382.9.20160321T184117Z.wav_chan0.xml	0
21/03/2016 18:55	AMAR382.9.20160321T185544Z.wav_chan0.xml	0
21/03/2016 19:10	AMAR382.9.20160321T191011Z.wav_chan0.xml	0
21/03/2016 19:24	AMAR382.9.20160321T192438Z.wav_chan0.xml	0
21/03/2016 19:39	AMAR382.9.20160321T193905Z.wav_chan0.xml	0
21/03/2016 19:53	AMAR382.9.20160321T195332Z.wav_chan0.xml	0
21/03/2016 20:07	AMAR382.9.20160321T200759Z.wav_chan0.xml	0
21/03/2016 20:22	AMAR382.9.20160321T202226Z.wav_chan0.xml	0
21/03/2016 20:36	AMAR382.9.20160321T203653Z.wav_chan0.xml	0
21/03/2016 20:51	AMAR382.9.20160321T205120Z.wav_chan0.xml	0
21/03/2016 21:05	AMAR382.9.20160321T210547Z.wav_chan0.xml	0
21/03/2016 21:20	AMAR382.9.20160321T212014Z.wav_chan0.xml	0
21/03/2016 21:34	AMAR382.9.20160321T213441Z.wav_chan0.xml	0
21/03/2016 21:49	AMAR382.9.20160321T214908Z.wav_chan0.xml	4
21/03/2016 22:03	AMAR382.9.20160321T220335Z.wav_chan0.xml	5
21/03/2016 22:18	AMAR382.9.20160321T221802Z.wav_chan0.xml	0
21/03/2016 22:32	AMAR382.9.20160321T223229Z.wav_chan0.xml	0
21/03/2016 22:46	AMAR382.9.20160321T224656Z.wav_chan0.xml	0
21/03/2016 23:01	AMAR382.9.20160321T230123Z.wav_chan0.xml	0
21/03/2016 23:15	AMAR382.9.20160321T231550Z.wav_chan0.xml	0
21/03/2016 23:30	AMAR382.9.20160321T233017Z.wav_chan0.xml	0
21/03/2016 23:44	AMAR382.9.20160321T234444Z.wav_chan0.xml	0
21/03/2016 23:59	AMAR382.9.20160321T235911Z.wav_chan0.xml	0
22/03/2016 0:13	AMAR382.9.20160322T001338Z.wav_chan0.xml	0
22/03/2016 0:28	AMAR382.9.20160322T002805Z.wav_chan0.xml	0
22/03/2016 0:42	AMAR382.9.20160322T004232Z.wav_chan0.xml	0
22/03/2016 0:56	AMAR382.9.20160322T005659Z.wav_chan0.xml	0
22/03/2016 1:11	AMAR382.9.20160322T011126Z.wav_chan0.xml	0
22/03/2016 1:25	AMAR382.9.20160322T012553Z.wav_chan0.xml	0
22/03/2016 1:40	AMAR382.9.20160322T014020Z.wav_chan0.xml	0
22/03/2016 1:54	AMAR382.9.20160322T015447Z.wav_chan0.xml	0
22/03/2016 2:09	AMAR382.9.20160322T020914Z.wav_chan0.xml	0
22/03/2016 2:23	AMAR382.9.20160322T022341Z.wav_chan0.xml	0
22/03/2016 2:38	AMAR382.9.20160322T023808Z.wav_chan0.xml	0
22/03/2016 2:52	AMAR382.9.20160322T025235Z.wav_chan0.xml	0
22/03/2016 3:07	AMAR382.9.20160322T030702Z.wav_chan0.xml	0
22/03/2016 3:21	AMAR382.9.20160322T032129Z.wav_chan0.xml	0
22/03/2016 3:35	AMAR382.9.20160322T033556Z.wav_chan0.xml	0
22/03/2016 3:50	AMAR382.9.20160322T035023Z.wav_chan0.xml	0
22/03/2016 4:04	AMAR382.9.20160322T040450Z.wav_chan0.xml	0
22/03/2016 4:19	AMAR382.9.20160322T041917Z.wav_chan0.xml	0
22/03/2016 4:33	AMAR382.9.20160322T043344Z.wav_chan0.xml	0
22/03/2016 4:48	AMAR382.9.20160322T044811Z.wav_chan0.xml	0
22/03/2016 5:02	AMAR382.9.20160322T050238Z.wav_chan0.xml	0
22/03/2016 5:17	AMAR382.9.20160322T051705Z.wav_chan0.xml	0
22/03/2016 5:31	AMAR382.9.20160322T053132Z.wav_chan0.xml	0
22/03/2016 5:45	AMAR382.9.20160322T054559Z.wav_chan0.xml	0
22/03/2016 6:00	AMAR382.9.20160322T060026Z.wav_chan0.xml	0
22/03/2016 6:14	AMAR382.9.20160322T061453Z.wav_chan0.xml	0
22/03/2016 6:29	AMAR382.9.20160322T062920Z.wav_chan0.xml	0
22/03/2016 6:43	AMAR382.9.20160322T064347Z.wav_chan0.xml	0
22/03/2016 6:58	AMAR382.9.20160322T065814Z.wav_chan0.xml	0
22/03/2016 7:12	AMAR382.9.20160322T071241Z.wav_chan0.xml	0
22/03/2016 7:27	AMAR382.9.20160322T072708Z.wav_chan0.xml	0
22/03/2016 7:41	AMAR382.9.20160322T074135Z.wav_chan0.xml	0
22/03/2016 7:56	AMAR382.9.20160322T075602Z.wav_chan0.xml	0
22/03/2016 8:10	AMAR382.9.20160322T081029Z.wav_chan0.xml	0
22/03/2016 8:24	AMAR382.9.20160322T082456Z.wav_chan0.xml	0
22/03/2016 8:39	AMAR382.9.20160322T083923Z.wav_chan0.xml	0
22/03/2016 8:53	AMAR382.9.20160322T085350Z.wav_chan0.xml	0
22/03/2016 9:08	AMAR382.9.20160322T090817Z.wav_chan0.xml	0
22/03/2016 9:22	AMAR382.9.20160322T092244Z.wav_chan0.xml	0
22/03/2016 9:37	AMAR382.9.20160322T093711Z.wav_chan0.xml	0
22/03/2016 9:51	AMAR382.9.20160322T095138Z.wav_chan0.xml	0
22/03/2016 10:06	AMAR382.9.20160322T100605Z.wav_chan0.xml	0
22/03/2016 10:20	AMAR382.9.20160322T102032Z.wav_chan0.xml	0
22/03/2016 10:34	AMAR382.9.20160322T103459Z.wav_chan0.xml	0
22/03/2016 10:49	AMAR382.9.20160322T104926Z.wav_chan0.xml	0
22/03/2016 11:03	AMAR382.9.20160322T110353Z.wav_chan0.xml	0
22/03/2016 11:18	AMAR382.9.20160322T111820Z.wav_chan0.xml	0
22/03/2016 11:32	AMAR382.9.20160322T113247Z.wav_chan0.xml	0
22/03/2016 11:47	AMAR382.9.20160322T114714Z.wav_chan0.xml	0
22/03/2016 12:01	AMAR382.9.20160322T120141Z.wav_chan0.xml	0
22/03/2016 12:16	AMAR382.9.20160322T121608Z.wav_chan0.xml	0
22/03/2016 12:30	AMAR382.9.20160322T123035Z.wav_chan0.xml	0
22/03/2016 12:45	AMAR382.9.20160322T124502Z.wav_chan0.xml	0
22/03/2016 12:59	AMAR382.9.20160322T125929Z.wav_chan0.xml	0
22/03/2016 13:13	AMAR382.9.20160322T131356Z.wav_chan0.xml	0
22/03/2016 13:28	AMAR382.9.20160322T132823Z.wav_chan0.xml	0
22/03/2016 13:42	AMAR382.9.20160322T134250Z.wav_chan0.xml	0
22/03/2016 13:57	AMAR382.9.20160322T135717Z.wav_chan0.xml	0
22/03/2016 14:11	AMAR382.9.20160322T141144Z.wav_chan0.xml	0
22/03/2016 14:26	AMAR382.9.20160322T142611Z.wav_chan0.xml	0
22/03/2016 14:40	AMAR382.9.20160322T144038Z.wav_chan0.xml	0
22/03/2016 14:55	AMAR382.9.20160322T145505Z.wav_chan0.xml	0
22/03/2016 15:09	AMAR382.9.20160322T150932Z.wav_chan0.xml	0
22/03/2016 15:23	AMAR382.9.20160322T152359Z.wav_chan0.xml	0
22/03/2016 15:38	AMAR382.9.20160322T153826Z.wav_chan0.xml	0
22/03/2016 15:52	AMAR382.9.20160322T155253Z.wav_chan0.xml	0
22/03/2016 16:07	AMAR382.9.20160322T160720Z.wav_chan0.xml	0
22/03/2016 16:21	AMAR382.9.20160322T162147Z.wav_chan0.xml	0
22/03/2016 16:36	AMAR382.9.20160322T163614Z.wav_chan0.xml	0
22/03/2016 16:50	AMAR382.9.20160322T165041Z.wav_chan0.xml	0
22/03/2016 17:05	AMAR382.9.20160322T170508Z.wav_chan0.xml	0
22/03/2016 17:19	AMAR382.9.20160322T171935Z.wav_chan0.xml	0
22/03/2016 17:34	AMAR382.9.20160322T173402Z.wav_chan0.xml	0
22/03/2016 17:48	AMAR382.9.20160322T174829Z.wav_chan0.xml	0
22/03/2016 18:02	AMAR382.9.20160322T180256Z.wav_chan0.xml	0
22/03/2016 18:17	AMAR382.9.20160322T181723Z.wav_chan0.xml	0
22/03/2016 18:31	AMAR382.9.20160322T183150Z.wav_chan0.xml	0
22/03/2016 18:46	AMAR382.9.20160322T184617Z.wav_chan0.xml	0
22/03/2016 19:00	AMAR382.9.20160322T190044Z.wav_chan0.xml	0
22/03/2016 19:15	AMAR382.9.20160322T191511Z.wav_chan0.xml	0
22/03/2016 19:29	AMAR382.9.20160322T192938Z.wav_chan0.xml	0
22/03/2016 19:44	AMAR382.9.20160322T194405Z.wav_chan0.xml	0
22/03/2016 19:58	AMAR382.9.20160322T195832Z.wav_chan0.xml	0
22/03/2016 20:12	AMAR382.9.20160322T201259Z.wav_chan0.xml	0
22/03/2016 20:27	AMAR382.9.20160322T202726Z.wav_chan0.xml	0
22/03/2016 20:41	AMAR382.9.20160322T204153Z.wav_chan0.xml	0
22/03/2016 20:56	AMAR382.9.20160322T205620Z.wav_chan0.xml	0
22/03/2016 21:10	AMAR382.9.20160322T211047Z.wav_chan0.xml	0
22/03/2016 21:25	AMAR382.9.20160322T212514Z.wav_chan0.xml	0
22/03/2016 21:39	AMAR382.9.20160322T213941Z.wav_chan0.xml	0
22/03/2016 21:54	AMAR382.9.20160322T215408Z.wav_chan0.xml	0
22/03/2016 22:08	AMAR382.9.20160322T220835Z.wav_chan0.xml	0
22/03/2016 22:23	AMAR382.9.20160322T222302Z.wav_chan0.xml	0
22/03/2016 22:37	AMAR382.9.20160322T223729Z.wav_chan0.xml	0
22/03/2016 22:51	AMAR382.9.20160322T225156Z.wav_chan0.xml	0
22/03/2016 23:06	AMAR382.9.20160322T230623Z.wav_chan0.xml	0
22/03/2016 23:20	AMAR382.9.20160322T232050Z.wav_chan0.xml	0
22/03/2016 23:35	AMAR382.9.20160322T233517Z.wav_chan0.xml	0
22/03/2016 23:49	AMAR382.9.20160322T234944Z.wav_chan0.xml	0
23/03/2016 0:04	AMAR382.9.20160323T000411Z.wav_chan0.xml	0
23/03/2016 0:18	AMAR382.9.20160323T001838Z.wav_chan0.xml	0
23/03/2016 0:33	AMAR382.9.20160323T003305Z.wav_chan0.xml	0
23/03/2016 0:47	AMAR382.9.20160323T004732Z.wav_chan0.xml	0
23/03/2016 1:01	AMAR382.9.20160323T010159Z.wav_chan0.xml	0
23/03/2016 1:16	AMAR382.9.20160323T011626Z.wav_chan0.xml	0
23/03/2016 1:30	AMAR382.9.20160323T013053Z.wav_chan0.xml	0
23/03/2016 1:45	AMAR382.9.20160323T014520Z.wav_chan0.xml	0
23/03/2016 1:59	AMAR382.9.20160323T015947Z.wav_chan0.xml	0
23/03/2016 2:14	AMAR382.9.20160323T021414Z.wav_chan0.xml	0
23/03/2016 2:28	AMAR382.9.20160323T022841Z.wav_chan0.xml	0
23/03/2016 2:43	AMAR382.9.20160323T024308Z.wav_chan0.xml	0
23/03/2016 2:57	AMAR382.9.20160323T025735Z.wav_chan0.xml	0
23/03/2016 3:12	AMAR382.9.20160323T031202Z.wav_chan0.xml	0
23/03/2016 3:26	AMAR382.9.20160323T032629Z.wav_chan0.xml	0
23/03/2016 3:40	AMAR382.9.20160323T034056Z.wav_chan0.xml	0
23/03/2016 3:55	AMAR382.9.20160323T035523Z.wav_chan0.xml	0
23/03/2016 4:09	AMAR382.9.20160323T040950Z.wav_chan0.xml	0
23/03/2016 4:24	AMAR382.9.20160323T042417Z.wav_chan0.xml	0
23/03/2016 4:38	AMAR382.9.20160323T043844Z.wav_chan0.xml	0
23/03/2016 4:53	AMAR382.9.20160323T045311Z.wav_chan0.xml	0
23/03/2016 5:07	AMAR382.9.20160323T050738Z.wav_chan0.xml	0
23/03/2016 5:22	AMAR382.9.20160323T052205Z.wav_chan0.xml	0
23/03/2016 5:36	AMAR382.9.20160323T053632Z.wav_chan0.xml	0
23/03/2016 5:50	AMAR382.9.20160323T055059Z.wav_chan0.xml	0
23/03/2016 6:05	AMAR382.9.20160323T060526Z.wav_chan0.xml	0
23/03/2016 6:19	AMAR382.9.20160323T061953Z.wav_chan0.xml	0
23/03/2016 6:34	AMAR382.9.20160323T063420Z.wav_chan0.xml	0
23/03/2016 6:48	AMAR382.9.20160323T064847Z.wav_chan0.xml	0
23/03/2016 7:03	AMAR382.9.20160323T070314Z.wav_chan0.xml	0
23/03/2016 7:17	AMAR382.9.20160323T071741Z.wav_chan0.xml	0
23/03/2016 7:32	AMAR382.9.20160323T073208Z.wav_chan0.xml	0
23/03/2016 7:46	AMAR382.9.20160323T074635Z.wav_chan0.xml	0
23/03/2016 8:01	AMAR382.9.20160323T080102Z.wav_chan0.xml	0
23/03/2016 8:15	AMAR382.9.20160323T081529Z.wav_chan0.xml	0
23/03/2016 8:29	AMAR382.9.20160323T082956Z.wav_chan0.xml	0
23/03/2016 8:44	AMAR382.9.20160323T084423Z.wav_chan0.xml	0
23/03/2016 8:58	AMAR382.9.20160323T085850Z.wav_chan0.xml	0
23/03/2016 9:13	AMAR382.9.20160323T091317Z.wav_chan0.xml	0
23/03/2016 9:27	AMAR382.9.20160323T092744Z.wav_chan0.xml	0
23/03/2016 9:42	AMAR382.9.20160323T094211Z.wav_chan0.xml	0
23/03/2016 9:56	AMAR382.9.20160323T095638Z.wav_chan0.xml	0
23/03/2016 10:11	AMAR382.9.20160323T101105Z.wav_chan0.xml	0
23/03/2016 10:25	AMAR382.9.20160323T102532Z.wav_chan0.xml	0
23/03/2016 10:39	AMAR382.9.20160323T103959Z.wav_chan0.xml	0
23/03/2016 10:54	AMAR382.9.20160323T105426Z.wav_chan0.xml	0
23/03/2016 11:08	AMAR382.9.20160323T110853Z.wav_chan0.xml	0
23/03/2016 11:23	AMAR382.9.20160323T112320Z.wav_chan0.xml	0
23/03/2016 11:37	AMAR382.9.20160323T113747Z.wav_chan0.xml	0
23/03/2016 11:52	AMAR382.9.20160323T115214Z.wav_chan0.xml	0
23/03/2016 12:06	AMAR382.9.20160323T120641Z.wav_chan0.xml	0
23/03/2016 12:21	AMAR382.9.20160323T122108Z.wav_chan0.xml	0
23/03/2016 12:35	AMAR382.9.20160323T123535Z.wav_chan0.xml	0
23/03/2016 12:50	AMAR382.9.20160323T125002Z.wav_chan0.xml	0
23/03/2016 13:04	AMAR382.9.20160323T130429Z.wav_chan0.xml	0
23/03/2016 13:18	AMAR382.9.20160323T131856Z.wav_chan0.xml	0
23/03/2016 13:33	AMAR382.9.20160323T133323Z.wav_chan0.xml	0
23/03/2016 13:47	AMAR382.9.20160323T134750Z.wav_chan0.xml	0
23/03/2016 14:02	AMAR382.9.20160323T140217Z.wav_chan0.xml	0
23/03/2016 14:16	AMAR382.9.20160323T141644Z.wav_chan0.xml	0
23/03/2016 14:31	AMAR382.9.20160323T143111Z.wav_chan0.xml	0
23/03/2016 14:45	AMAR382.9.20160323T144538Z.wav_chan0.xml	0
23/03/2016 15:00	AMAR382.9.20160323T150005Z.wav_chan0.xml	0
23/03/2016 15:14	AMAR382.9.20160323T151432Z.wav_chan0.xml	0
23/03/2016 15:28	AMAR382.9.20160323T152859Z.wav_chan0.xml	0
23/03/2016 15:43	AMAR382.9.20160323T154326Z.wav_chan0.xml	0
23/03/2016 15:57	AMAR382.9.20160323T155753Z.wav_chan0.xml	0
23/03/2016 16:12	AMAR382.9.20160323T161220Z.wav_chan0.xml	0
23/03/2016 16:26	AMAR382.9.20160323T162647Z.wav_chan0.xml	0
23/03/2016 16:41	AMAR382.9.20160323T164114Z.wav_chan0.xml	0
23/03/2016 16:55	AMAR382.9.20160323T165541Z.wav_chan0.xml	0
23/03/2016 17:10	AMAR382.9.20160323T171008Z.wav_chan0.xml	0
23/03/2016 17:24	AMAR382.9.20160323T172435Z.wav_chan0.xml	0
23/03/2016 17:39	AMAR382.9.20160323T173902Z.wav_chan0.xml	3
23/03/2016 17:53	AMAR382.9.20160323T175329Z.wav_chan0.xml	0
23/03/2016 18:07	AMAR382.9.20160323T180756Z.wav_chan0.xml	0
23/03/2016 18:22	AMAR382.9.20160323T182223Z.wav_chan0.xml	0
23/03/2016 18:36	AMAR382.9.20160323T183650Z.wav_chan0.xml	0
23/03/2016 18:51	AMAR382.9.20160323T185117Z.wav_chan0.xml	0
23/03/2016 19:05	AMAR382.9.20160323T190544Z.wav_chan0.xml	0
23/03/2016 19:20	AMAR382.9.20160323T192011Z.wav_chan0.xml	0
23/03/2016 19:34	AMAR382.9.20160323T193438Z.wav_chan0.xml	0
23/03/2016 19:49	AMAR382.9.20160323T194905Z.wav_chan0.xml	0
23/03/2016 20:03	AMAR382.9.20160323T200332Z.wav_chan0.xml	0
23/03/2016 20:17	AMAR382.9.20160323T201759Z.wav_chan0.xml	0
23/03/2016 20:32	AMAR382.9.20160323T203226Z.wav_chan0.xml	0
23/03/2016 20:46	AMAR382.9.20160323T204653Z.wav_chan0.xml	0
23/03/2016 21:01	AMAR382.9.20160323T210120Z.wav_chan0.xml	0
23/03/2016 21:15	AMAR382.9.20160323T211547Z.wav_chan0.xml	0
23/03/2016 21:30	AMAR382.9.20160323T213014Z.wav_chan0.xml	0
23/03/2016 21:44	AMAR382.9.20160323T214441Z.wav_chan0.xml	0
23/03/2016 21:59	AMAR382.9.20160323T215908Z.wav_chan0.xml	0
23/03/2016 22:13	AMAR382.9.20160323T221335Z.wav_chan0.xml	0
23/03/2016 22:28	AMAR382.9.20160323T222802Z.wav_chan0.xml	0
23/03/2016 22:42	AMAR382.9.20160323T224229Z.wav_chan0.xml	0
23/03/2016 22:56	AMAR382.9.20160323T225656Z.wav_chan0.xml	0
23/03/2016 23:11	AMAR382.9.20160323T231123Z.wav_chan0.xml	0
23/03/2016 23:25	AMAR382.9.20160323T232550Z.wav_chan0.xml	0
23/03/2016 23:40	AMAR382.9.20160323T234017Z.wav_chan0.xml	0
23/03/2016 23:54	AMAR382.9.20160323T235444Z.wav_chan0.xml	0
24/03/2016 0:09	AMAR382.9.20160324T000911Z.wav_chan0.xml	0
24/03/2016 0:23	AMAR382.9.20160324T002338Z.wav_chan0.xml	0
24/03/2016 0:38	AMAR382.9.20160324T003805Z.wav_chan0.xml	0
24/03/2016 0:52	AMAR382.9.20160324T005232Z.wav_chan0.xml	0
24/03/2016 1:06	AMAR382.9.20160324T010659Z.wav_chan0.xml	0
24/03/2016 1:21	AMAR382.9.20160324T012126Z.wav_chan0.xml	0
24/03/2016 1:35	AMAR382.9.20160324T013553Z.wav_chan0.xml	0
24/03/2016 1:50	AMAR382.9.20160324T015020Z.wav_chan0.xml	0
24/03/2016 2:04	AMAR382.9.20160324T020447Z.wav_chan0.xml	0
24/03/2016 2:19	AMAR382.9.20160324T021914Z.wav_chan0.xml	0
24/03/2016 2:33	AMAR382.9.20160324T023341Z.wav_chan0.xml	0
24/03/2016 2:48	AMAR382.9.20160324T024808Z.wav_chan0.xml	0
24/03/2016 3:02	AMAR382.9.20160324T030235Z.wav_chan0.xml	0
24/03/2016 3:17	AMAR382.9.20160324T031702Z.wav_chan0.xml	0
24/03/2016 3:31	AMAR382.9.20160324T033129Z.wav_chan0.xml	0
24/03/2016 3:45	AMAR382.9.20160324T034556Z.wav_chan0.xml	0
24/03/2016 4:00	AMAR382.9.20160324T040023Z.wav_chan0.xml	0
24/03/2016 4:14	AMAR382.9.20160324T041450Z.wav_chan0.xml	0
24/03/2016 4:29	AMAR382.9.20160324T042917Z.wav_chan0.xml	0
24/03/2016 4:43	AMAR382.9.20160324T044344Z.wav_chan0.xml	0
24/03/2016 4:58	AMAR382.9.20160324T045811Z.wav_chan0.xml	0
24/03/2016 5:12	AMAR382.9.20160324T051238Z.wav_chan0.xml	0
24/03/2016 5:27	AMAR382.9.20160324T052705Z.wav_chan0.xml	0
24/03/2016 5:41	AMAR382.9.20160324T054132Z.wav_chan0.xml	0
24/03/2016 5:55	AMAR382.9.20160324T055559Z.wav_chan0.xml	0
24/03/2016 6:10	AMAR382.9.20160324T061026Z.wav_chan0.xml	0
24/03/2016 6:24	AMAR382.9.20160324T062453Z.wav_chan0.xml	0
24/03/2016 6:39	AMAR382.9.20160324T063920Z.wav_chan0.xml	0
24/03/2016 6:53	AMAR382.9.20160324T065347Z.wav_chan0.xml	0
24/03/2016 7:08	AMAR382.9.20160324T070814Z.wav_chan0.xml	0
24/03/2016 7:22	AMAR382.9.20160324T072241Z.wav_chan0.xml	0
24/03/2016 7:37	AMAR382.9.20160324T073708Z.wav_chan0.xml	0
24/03/2016 7:51	AMAR382.9.20160324T075135Z.wav_chan0.xml	0
24/03/2016 8:06	AMAR382.9.20160324T080602Z.wav_chan0.xml	0
24/03/2016 8:20	AMAR382.9.20160324T082029Z.wav_chan0.xml	0
24/03/2016 8:34	AMAR382.9.20160324T083456Z.wav_chan0.xml	0
24/03/2016 8:49	AMAR382.9.20160324T084923Z.wav_chan0.xml	0
24/03/2016 9:03	AMAR382.9.20160324T090350Z.wav_chan0.xml	0
24/03/2016 9:18	AMAR382.9.20160324T091817Z.wav_chan0.xml	0
24/03/2016 9:32	AMAR382.9.20160324T093244Z.wav_chan0.xml	0
24/03/2016 9:47	AMAR382.9.20160324T094711Z.wav_chan0.xml	0
24/03/2016 10:01	AMAR382.9.20160324T100138Z.wav_chan0.xml	0
24/03/2016 10:16	AMAR382.9.20160324T101605Z.wav_chan0.xml	0
24/03/2016 10:30	AMAR382.9.20160324T103032Z.wav_chan0.xml	0
24/03/2016 10:44	AMAR382.9.20160324T104459Z.wav_chan0.xml	0
24/03/2016 10:59	AMAR382.9.20160324T105926Z.wav_chan0.xml	0
24/03/2016 11:13	AMAR382.9.20160324T111353Z.wav_chan0.xml	0
24/03/2016 11:28	AMAR382.9.20160324T112820Z.wav_chan0.xml	0
24/03/2016 11:42	AMAR382.9.20160324T114247Z.wav_chan0.xml	0
24/03/2016 11:57	AMAR382.9.20160324T115714Z.wav_chan0.xml	0
24/03/2016 12:11	AMAR382.9.20160324T121141Z.wav_chan0.xml	0
24/03/2016 12:26	AMAR382.9.20160324T122608Z.wav_chan0.xml	0
24/03/2016 12:40	AMAR382.9.20160324T124035Z.wav_chan0.xml	0
24/03/2016 12:55	AMAR382.9.20160324T125502Z.wav_chan0.xml	0
24/03/2016 13:09	AMAR382.9.20160324T130929Z.wav_chan0.xml	0
24/03/2016 13:23	AMAR382.9.20160324T132356Z.wav_chan0.xml	0
24/03/2016 13:38	AMAR382.9.20160324T133823Z.wav_chan0.xml	0
24/03/2016 13:52	AMAR382.9.20160324T135250Z.wav_chan0.xml	0
24/03/2016 14:07	AMAR382.9.20160324T140717Z.wav_chan0.xml	0
24/03/2016 14:21	AMAR382.9.20160324T142144Z.wav_chan0.xml	0
24/03/2016 14:36	AMAR382.9.20160324T143611Z.wav_chan0.xml	0
24/03/2016 14:50	AMAR382.9.20160324T145038Z.wav_chan0.xml	0
24/03/2016 15:05	AMAR382.9.20160324T150505Z.wav_chan0.xml	0
24/03/2016 15:19	AMAR382.9.20160324T151932Z.wav_chan0.xml	0
24/03/2016 15:33	AMAR382.9.20160324T153359Z.wav_chan0.xml	0
24/03/2016 15:48	AMAR382.9.20160324T154826Z.wav_chan0.xml	0
24/03/2016 16:02	AMAR382.9.20160324T160253Z.wav_chan0.xml	0
24/03/2016 16:17	AMAR382.9.20160324T161720Z.wav_chan0.xml	0
24/03/2016 16:31	AMAR382.9.20160324T163147Z.wav_chan0.xml	0
24/03/2016 16:46	AMAR382.9.20160324T164614Z.wav_chan0.xml	0
24/03/2016 17:00	AMAR382.9.20160324T170041Z.wav_chan0.xml	0
24/03/2016 17:15	AMAR382.9.20160324T171508Z.wav_chan0.xml	0
24/03/2016 17:29	AMAR382.9.20160324T172935Z.wav_chan0.xml	0
24/03/2016 17:44	AMAR382.9.20160324T174402Z.wav_chan0.xml	0
24/03/2016 17:58	AMAR382.9.20160324T175829Z.wav_chan0.xml	0
24/03/2016 18:12	AMAR382.9.20160324T181256Z.wav_chan0.xml	0
24/03/2016 18:27	AMAR382.9.20160324T182723Z.wav_chan0.xml	0
24/03/2016 18:41	AMAR382.9.20160324T184150Z.wav_chan0.xml	0
24/03/2016 18:56	AMAR382.9.20160324T185617Z.wav_chan0.xml	0
24/03/2016 19:10	AMAR382.9.20160324T191044Z.wav_chan0.xml	0
24/03/2016 19:25	AMAR382.9.20160324T192511Z.wav_chan0.xml	0
24/03/2016 19:39	AMAR382.9.20160324T193938Z.wav_chan0.xml	0
24/03/2016 19:54	AMAR382.9.20160324T195405Z.wav_chan0.xml	0
24/03/2016 20:08	AMAR382.9.20160324T200832Z.wav_chan0.xml	0
24/03/2016 20:22	AMAR382.9.20160324T202259Z.wav_chan0.xml	0
24/03/2016 20:37	AMAR382.9.20160324T203726Z.wav_chan0.xml	0
24/03/2016 20:51	AMAR382.9.20160324T205153Z.wav_chan0.xml	0
24/03/2016 21:06	AMAR382.9.20160324T210620Z.wav_chan0.xml	0
24/03/2016 21:20	AMAR382.9.20160324T212047Z.wav_chan0.xml	0
24/03/2016 21:35	AMAR382.9.20160324T213514Z.wav_chan0.xml	0
24/03/2016 21:49	AMAR382.9.20160324T214941Z.wav_chan0.xml	0
24/03/2016 22:04	AMAR382.9.20160324T220408Z.wav_chan0.xml	0
24/03/2016 22:18	AMAR382.9.20160324T221835Z.wav_chan0.xml	0
24/03/2016 22:47	AMAR382.9.20160324T224729Z.wav_chan0.xml	0
24/03/2016 23:01	AMAR382.9.20160324T230156Z.wav_chan0.xml	0
24/03/2016 23:16	AMAR382.9.20160324T231623Z.wav_chan0.xml	0
24/03/2016 23:30	AMAR382.9.20160324T233050Z.wav_chan0.xml	0
24/03/2016 23:45	AMAR382.9.20160324T234517Z.wav_chan0.xml	0
24/03/2016 23:59	AMAR382.9.20160324T235944Z.wav_chan0.xml	0
25/03/2016 0:14	AMAR382.9.20160325T001411Z.wav_chan0.xml	0
25/03/2016 0:28	AMAR382.9.20160325T002838Z.wav_chan0.xml	0
25/03/2016 0:43	AMAR382.9.20160325T004305Z.wav_chan0.xml	0
25/03/2016 0:57	AMAR382.9.20160325T005732Z.wav_chan0.xml	0
25/03/2016 1:11	AMAR382.9.20160325T011159Z.wav_chan0.xml	0
25/03/2016 1:26	AMAR382.9.20160325T012626Z.wav_chan0.xml	0
25/03/2016 1:40	AMAR382.9.20160325T014053Z.wav_chan0.xml	0
25/03/2016 1:55	AMAR382.9.20160325T015520Z.wav_chan0.xml	0
25/03/2016 2:09	AMAR382.9.20160325T020947Z.wav_chan0.xml	0
25/03/2016 2:24	AMAR382.9.20160325T022414Z.wav_chan0.xml	0
25/03/2016 2:38	AMAR382.9.20160325T023841Z.wav_chan0.xml	0
25/03/2016 2:53	AMAR382.9.20160325T025308Z.wav_chan0.xml	0
25/03/2016 3:07	AMAR382.9.20160325T030735Z.wav_chan0.xml	0
25/03/2016 3:22	AMAR382.9.20160325T032202Z.wav_chan0.xml	0
25/03/2016 3:36	AMAR382.9.20160325T033629Z.wav_chan0.xml	3
25/03/2016 3:50	AMAR382.9.20160325T035056Z.wav_chan0.xml	0
25/03/2016 4:05	AMAR382.9.20160325T040523Z.wav_chan0.xml	0
25/03/2016 4:19	AMAR382.9.20160325T041950Z.wav_chan0.xml	0
25/03/2016 4:34	AMAR382.9.20160325T043417Z.wav_chan0.xml	0
25/03/2016 4:48	AMAR382.9.20160325T044844Z.wav_chan0.xml	0
25/03/2016 5:03	AMAR382.9.20160325T050311Z.wav_chan0.xml	0
25/03/2016 5:17	AMAR382.9.20160325T051738Z.wav_chan0.xml	0
25/03/2016 5:32	AMAR382.9.20160325T053205Z.wav_chan0.xml	0
25/03/2016 5:46	AMAR382.9.20160325T054632Z.wav_chan0.xml	0
25/03/2016 6:00	AMAR382.9.20160325T060059Z.wav_chan0.xml	0
25/03/2016 6:15	AMAR382.9.20160325T061526Z.wav_chan0.xml	0
25/03/2016 6:29	AMAR382.9.20160325T062953Z.wav_chan0.xml	0
25/03/2016 6:44	AMAR382.9.20160325T064420Z.wav_chan0.xml	0
25/03/2016 6:58	AMAR382.9.20160325T065847Z.wav_chan0.xml	0
25/03/2016 7:13	AMAR382.9.20160325T071314Z.wav_chan0.xml	0
25/03/2016 7:27	AMAR382.9.20160325T072741Z.wav_chan0.xml	0
25/03/2016 7:42	AMAR382.9.20160325T074208Z.wav_chan0.xml	0
25/03/2016 7:56	AMAR382.9.20160325T075635Z.wav_chan0.xml	0
25/03/2016 8:11	AMAR382.9.20160325T081102Z.wav_chan0.xml	0
25/03/2016 8:25	AMAR382.9.20160325T082529Z.wav_chan0.xml	0
25/03/2016 8:39	AMAR382.9.20160325T083956Z.wav_chan0.xml	0
25/03/2016 8:54	AMAR382.9.20160325T085423Z.wav_chan0.xml	0
25/03/2016 9:08	AMAR382.9.20160325T090850Z.wav_chan0.xml	0
25/03/2016 9:23	AMAR382.9.20160325T092317Z.wav_chan0.xml	0
25/03/2016 9:37	AMAR382.9.20160325T093744Z.wav_chan0.xml	0
25/03/2016 9:52	AMAR382.9.20160325T095211Z.wav_chan0.xml	0
25/03/2016 10:06	AMAR382.9.20160325T100638Z.wav_chan0.xml	0
25/03/2016 10:21	AMAR382.9.20160325T102105Z.wav_chan0.xml	0
25/03/2016 10:35	AMAR382.9.20160325T103532Z.wav_chan0.xml	0
25/03/2016 10:49	AMAR382.9.20160325T104959Z.wav_chan0.xml	0
25/03/2016 11:04	AMAR382.9.20160325T110426Z.wav_chan0.xml	0
25/03/2016 11:18	AMAR382.9.20160325T111853Z.wav_chan0.xml	0
25/03/2016 11:33	AMAR382.9.20160325T113320Z.wav_chan0.xml	0
25/03/2016 11:47	AMAR382.9.20160325T114747Z.wav_chan0.xml	0
25/03/2016 12:02	AMAR382.9.20160325T120214Z.wav_chan0.xml	0
25/03/2016 12:16	AMAR382.9.20160325T121641Z.wav_chan0.xml	0
25/03/2016 12:31	AMAR382.9.20160325T123108Z.wav_chan0.xml	0
25/03/2016 12:45	AMAR382.9.20160325T124535Z.wav_chan0.xml	0
25/03/2016 13:00	AMAR382.9.20160325T130002Z.wav_chan0.xml	0
25/03/2016 13:14	AMAR382.9.20160325T131429Z.wav_chan0.xml	0
25/03/2016 13:28	AMAR382.9.20160325T132856Z.wav_chan0.xml	0
25/03/2016 13:43	AMAR382.9.20160325T134323Z.wav_chan0.xml	0
25/03/2016 13:57	AMAR382.9.20160325T135750Z.wav_chan0.xml	0
25/03/2016 14:12	AMAR382.9.20160325T141217Z.wav_chan0.xml	0
25/03/2016 14:26	AMAR382.9.20160325T142644Z.wav_chan0.xml	0
25/03/2016 14:41	AMAR382.9.20160325T144111Z.wav_chan0.xml	0
25/03/2016 14:55	AMAR382.9.20160325T145538Z.wav_chan0.xml	0
25/03/2016 15:10	AMAR382.9.20160325T151005Z.wav_chan0.xml	0
25/03/2016 15:24	AMAR382.9.20160325T152432Z.wav_chan0.xml	0
25/03/2016 15:38	AMAR382.9.20160325T153859Z.wav_chan0.xml	0
25/03/2016 15:53	AMAR382.9.20160325T155326Z.wav_chan0.xml	0
25/03/2016 16:07	AMAR382.9.20160325T160753Z.wav_chan0.xml	0
25/03/2016 16:22	AMAR382.9.20160325T162220Z.wav_chan0.xml	0
25/03/2016 16:36	AMAR382.9.20160325T163647Z.wav_chan0.xml	0
25/03/2016 16:51	AMAR382.9.20160325T165114Z.wav_chan0.xml	0
25/03/2016 17:05	AMAR382.9.20160325T170541Z.wav_chan0.xml	0
25/03/2016 17:20	AMAR382.9.20160325T172008Z.wav_chan0.xml	0
25/03/2016 17:34	AMAR382.9.20160325T173435Z.wav_chan0.xml	0
25/03/2016 17:49	AMAR382.9.20160325T174902Z.wav_chan0.xml	0
25/03/2016 18:03	AMAR382.9.20160325T180329Z.wav_chan0.xml	0
25/03/2016 18:17	AMAR382.9.20160325T181756Z.wav_chan0.xml	0
25/03/2016 18:32	AMAR382.9.20160325T183223Z.wav_chan0.xml	0
25/03/2016 18:46	AMAR382.9.20160325T184650Z.wav_chan0.xml	0
25/03/2016 19:01	AMAR382.9.20160325T190117Z.wav_chan0.xml	0
25/03/2016 19:15	AMAR382.9.20160325T191544Z.wav_chan0.xml	0
25/03/2016 19:30	AMAR382.9.20160325T193011Z.wav_chan0.xml	0
25/03/2016 19:44	AMAR382.9.20160325T194438Z.wav_chan0.xml	0
25/03/2016 19:59	AMAR382.9.20160325T195905Z.wav_chan0.xml	0
25/03/2016 20:13	AMAR382.9.20160325T201332Z.wav_chan0.xml	0
25/03/2016 20:27	AMAR382.9.20160325T202759Z.wav_chan0.xml	0
25/03/2016 20:42	AMAR382.9.20160325T204226Z.wav_chan0.xml	0
25/03/2016 20:56	AMAR382.9.20160325T205653Z.wav_chan0.xml	0
25/03/2016 21:11	AMAR382.9.20160325T211120Z.wav_chan0.xml	0
25/03/2016 21:25	AMAR382.9.20160325T212547Z.wav_chan0.xml	0
25/03/2016 21:40	AMAR382.9.20160325T214014Z.wav_chan0.xml	0
25/03/2016 21:54	AMAR382.9.20160325T215441Z.wav_chan0.xml	0
25/03/2016 22:09	AMAR382.9.20160325T220908Z.wav_chan0.xml	0
25/03/2016 22:23	AMAR382.9.20160325T222335Z.wav_chan0.xml	0
25/03/2016 22:38	AMAR382.9.20160325T223802Z.wav_chan0.xml	0
25/03/2016 22:52	AMAR382.9.20160325T225229Z.wav_chan0.xml	0
25/03/2016 23:06	AMAR382.9.20160325T230656Z.wav_chan0.xml	0
25/03/2016 23:21	AMAR382.9.20160325T232123Z.wav_chan0.xml	0
25/03/2016 23:35	AMAR382.9.20160325T233550Z.wav_chan0.xml	0
25/03/2016 23:50	AMAR382.9.20160325T235017Z.wav_chan0.xml	0
26/03/2016 0:04	AMAR382.9.20160326T000444Z.wav_chan0.xml	0
26/03/2016 0:19	AMAR382.9.20160326T001911Z.wav_chan0.xml	0
26/03/2016 0:33	AMAR382.9.20160326T003338Z.wav_chan0.xml	0
26/03/2016 0:48	AMAR382.9.20160326T004805Z.wav_chan0.xml	0
26/03/2016 1:02	AMAR382.9.20160326T010232Z.wav_chan0.xml	0
26/03/2016 1:16	AMAR382.9.20160326T011659Z.wav_chan0.xml	0
26/03/2016 1:31	AMAR382.9.20160326T013126Z.wav_chan0.xml	0
26/03/2016 1:45	AMAR382.9.20160326T014553Z.wav_chan0.xml	0
26/03/2016 2:00	AMAR382.9.20160326T020020Z.wav_chan0.xml	0
26/03/2016 2:14	AMAR382.9.20160326T021447Z.wav_chan0.xml	0
26/03/2016 2:29	AMAR382.9.20160326T022914Z.wav_chan0.xml	0
26/03/2016 2:43	AMAR382.9.20160326T024341Z.wav_chan0.xml	0
26/03/2016 2:58	AMAR382.9.20160326T025808Z.wav_chan0.xml	0
26/03/2016 3:12	AMAR382.9.20160326T031235Z.wav_chan0.xml	0
26/03/2016 3:27	AMAR382.9.20160326T032702Z.wav_chan0.xml	0
26/03/2016 3:41	AMAR382.9.20160326T034129Z.wav_chan0.xml	0
26/03/2016 3:55	AMAR382.9.20160326T035556Z.wav_chan0.xml	0
26/03/2016 4:10	AMAR382.9.20160326T041023Z.wav_chan0.xml	0
26/03/2016 4:24	AMAR382.9.20160326T042450Z.wav_chan0.xml	0
26/03/2016 4:39	AMAR382.9.20160326T043917Z.wav_chan0.xml	0
26/03/2016 4:53	AMAR382.9.20160326T045344Z.wav_chan0.xml	0
26/03/2016 5:08	AMAR382.9.20160326T050811Z.wav_chan0.xml	0
26/03/2016 5:22	AMAR382.9.20160326T052238Z.wav_chan0.xml	0
26/03/2016 5:37	AMAR382.9.20160326T053705Z.wav_chan0.xml	0
26/03/2016 5:51	AMAR382.9.20160326T055132Z.wav_chan0.xml	0
26/03/2016 6:05	AMAR382.9.20160326T060559Z.wav_chan0.xml	0
26/03/2016 6:20	AMAR382.9.20160326T062026Z.wav_chan0.xml	0
26/03/2016 6:34	AMAR382.9.20160326T063453Z.wav_chan0.xml	0
26/03/2016 6:49	AMAR382.9.20160326T064920Z.wav_chan0.xml	0
26/03/2016 7:03	AMAR382.9.20160326T070347Z.wav_chan0.xml	0
26/03/2016 7:18	AMAR382.9.20160326T071814Z.wav_chan0.xml	0
26/03/2016 7:32	AMAR382.9.20160326T073241Z.wav_chan0.xml	0
26/03/2016 7:47	AMAR382.9.20160326T074708Z.wav_chan0.xml	0
26/03/2016 8:01	AMAR382.9.20160326T080135Z.wav_chan0.xml	0
26/03/2016 8:16	AMAR382.9.20160326T081602Z.wav_chan0.xml	0
26/03/2016 8:30	AMAR382.9.20160326T083029Z.wav_chan0.xml	0
26/03/2016 8:44	AMAR382.9.20160326T084456Z.wav_chan0.xml	0
26/03/2016 8:59	AMAR382.9.20160326T085923Z.wav_chan0.xml	0
26/03/2016 9:13	AMAR382.9.20160326T091350Z.wav_chan0.xml	0
26/03/2016 9:28	AMAR382.9.20160326T092817Z.wav_chan0.xml	0
26/03/2016 9:42	AMAR382.9.20160326T094244Z.wav_chan0.xml	0
26/03/2016 9:57	AMAR382.9.20160326T095711Z.wav_chan0.xml	0
26/03/2016 10:11	AMAR382.9.20160326T101138Z.wav_chan0.xml	0
26/03/2016 10:26	AMAR382.9.20160326T102605Z.wav_chan0.xml	0
26/03/2016 10:40	AMAR382.9.20160326T104032Z.wav_chan0.xml	0
26/03/2016 10:54	AMAR382.9.20160326T105459Z.wav_chan0.xml	0
26/03/2016 11:09	AMAR382.9.20160326T110926Z.wav_chan0.xml	0
26/03/2016 11:23	AMAR382.9.20160326T112353Z.wav_chan0.xml	0
26/03/2016 11:38	AMAR382.9.20160326T113820Z.wav_chan0.xml	0
26/03/2016 11:52	AMAR382.9.20160326T115247Z.wav_chan0.xml	0
26/03/2016 12:07	AMAR382.9.20160326T120714Z.wav_chan0.xml	0
26/03/2016 12:21	AMAR382.9.20160326T122141Z.wav_chan0.xml	0
26/03/2016 12:36	AMAR382.9.20160326T123608Z.wav_chan0.xml	0
26/03/2016 12:50	AMAR382.9.20160326T125035Z.wav_chan0.xml	0
26/03/2016 13:05	AMAR382.9.20160326T130502Z.wav_chan0.xml	0
26/03/2016 13:19	AMAR382.9.20160326T131929Z.wav_chan0.xml	0
26/03/2016 13:33	AMAR382.9.20160326T133356Z.wav_chan0.xml	0
26/03/2016 13:48	AMAR382.9.20160326T134823Z.wav_chan0.xml	0
26/03/2016 14:02	AMAR382.9.20160326T140250Z.wav_chan0.xml	0
26/03/2016 14:17	AMAR382.9.20160326T141717Z.wav_chan0.xml	0
26/03/2016 14:31	AMAR382.9.20160326T143144Z.wav_chan0.xml	0
26/03/2016 14:46	AMAR382.9.20160326T144611Z.wav_chan0.xml	0
26/03/2016 15:00	AMAR382.9.20160326T150038Z.wav_chan0.xml	0
26/03/2016 15:15	AMAR382.9.20160326T151505Z.wav_chan0.xml	0
26/03/2016 15:29	AMAR382.9.20160326T152932Z.wav_chan0.xml	0
26/03/2016 15:43	AMAR382.9.20160326T154359Z.wav_chan0.xml	0
26/03/2016 15:58	AMAR382.9.20160326T155826Z.wav_chan0.xml	0
26/03/2016 16:12	AMAR382.9.20160326T161253Z.wav_chan0.xml	0
26/03/2016 16:27	AMAR382.9.20160326T162720Z.wav_chan0.xml	0
26/03/2016 16:41	AMAR382.9.20160326T164147Z.wav_chan0.xml	0
26/03/2016 16:56	AMAR382.9.20160326T165614Z.wav_chan0.xml	0
26/03/2016 17:10	AMAR382.9.20160326T171041Z.wav_chan0.xml	0
26/03/2016 17:25	AMAR382.9.20160326T172508Z.wav_chan0.xml	0
26/03/2016 17:39	AMAR382.9.20160326T173935Z.wav_chan0.xml	0
26/03/2016 17:54	AMAR382.9.20160326T175402Z.wav_chan0.xml	0
26/03/2016 18:08	AMAR382.9.20160326T180829Z.wav_chan0.xml	0
26/03/2016 18:22	AMAR382.9.20160326T182256Z.wav_chan0.xml	0
26/03/2016 18:37	AMAR382.9.20160326T183723Z.wav_chan0.xml	0
26/03/2016 18:51	AMAR382.9.20160326T185150Z.wav_chan0.xml	0
26/03/2016 19:06	AMAR382.9.20160326T190617Z.wav_chan0.xml	0
26/03/2016 19:20	AMAR382.9.20160326T192044Z.wav_chan0.xml	0
26/03/2016 19:35	AMAR382.9.20160326T193511Z.wav_chan0.xml	0
26/03/2016 19:49	AMAR382.9.20160326T194938Z.wav_chan0.xml	0
26/03/2016 20:04	AMAR382.9.20160326T200405Z.wav_chan0.xml	0
26/03/2016 20:18	AMAR382.9.20160326T201832Z.wav_chan0.xml	0
26/03/2016 20:32	AMAR382.9.20160326T203259Z.wav_chan0.xml	0
26/03/2016 20:47	AMAR382.9.20160326T204726Z.wav_chan0.xml	0
26/03/2016 21:01	AMAR382.9.20160326T210153Z.wav_chan0.xml	0
26/03/2016 21:16	AMAR382.9.20160326T211620Z.wav_chan0.xml	0
26/03/2016 21:30	AMAR382.9.20160326T213047Z.wav_chan0.xml	0
26/03/2016 21:45	AMAR382.9.20160326T214514Z.wav_chan0.xml	0
26/03/2016 21:59	AMAR382.9.20160326T215941Z.wav_chan0.xml	0
26/03/2016 22:14	AMAR382.9.20160326T221408Z.wav_chan0.xml	0
26/03/2016 22:28	AMAR382.9.20160326T222835Z.wav_chan0.xml	0
26/03/2016 22:43	AMAR382.9.20160326T224302Z.wav_chan0.xml	0
26/03/2016 22:57	AMAR382.9.20160326T225729Z.wav_chan0.xml	0
26/03/2016 23:11	AMAR382.9.20160326T231156Z.wav_chan0.xml	0
26/03/2016 23:26	AMAR382.9.20160326T232623Z.wav_chan0.xml	0
26/03/2016 23:40	AMAR382.9.20160326T234050Z.wav_chan0.xml	0
26/03/2016 23:55	AMAR382.9.20160326T235517Z.wav_chan0.xml	0
27/03/2016 0:09	AMAR382.9.20160327T000944Z.wav_chan0.xml	0
27/03/2016 0:24	AMAR382.9.20160327T002411Z.wav_chan0.xml	0
27/03/2016 0:38	AMAR382.9.20160327T003838Z.wav_chan0.xml	0
27/03/2016 0:53	AMAR382.9.20160327T005305Z.wav_chan0.xml	0
27/03/2016 1:07	AMAR382.9.20160327T010732Z.wav_chan0.xml	0
27/03/2016 1:21	AMAR382.9.20160327T012159Z.wav_chan0.xml	0
27/03/2016 1:36	AMAR382.9.20160327T013626Z.wav_chan0.xml	0
27/03/2016 1:50	AMAR382.9.20160327T015053Z.wav_chan0.xml	0
27/03/2016 2:05	AMAR382.9.20160327T020520Z.wav_chan0.xml	0
27/03/2016 2:19	AMAR382.9.20160327T021947Z.wav_chan0.xml	0
27/03/2016 2:34	AMAR382.9.20160327T023414Z.wav_chan0.xml	0
27/03/2016 2:48	AMAR382.9.20160327T024841Z.wav_chan0.xml	0
27/03/2016 3:03	AMAR382.9.20160327T030308Z.wav_chan0.xml	0
27/03/2016 3:17	AMAR382.9.20160327T031735Z.wav_chan0.xml	0
27/03/2016 3:32	AMAR382.9.20160327T033202Z.wav_chan0.xml	0
27/03/2016 3:46	AMAR382.9.20160327T034629Z.wav_chan0.xml	0
27/03/2016 4:00	AMAR382.9.20160327T040056Z.wav_chan0.xml	0
27/03/2016 4:15	AMAR382.9.20160327T041523Z.wav_chan0.xml	0
27/03/2016 4:29	AMAR382.9.20160327T042950Z.wav_chan0.xml	0
27/03/2016 4:44	AMAR382.9.20160327T044417Z.wav_chan0.xml	0
27/03/2016 4:58	AMAR382.9.20160327T045844Z.wav_chan0.xml	0
27/03/2016 5:13	AMAR382.9.20160327T051311Z.wav_chan0.xml	0
27/03/2016 5:27	AMAR382.9.20160327T052738Z.wav_chan0.xml	0
27/03/2016 5:42	AMAR382.9.20160327T054205Z.wav_chan0.xml	0
27/03/2016 5:56	AMAR382.9.20160327T055632Z.wav_chan0.xml	0
27/03/2016 6:10	AMAR382.9.20160327T061059Z.wav_chan0.xml	0
27/03/2016 6:25	AMAR382.9.20160327T062526Z.wav_chan0.xml	0
27/03/2016 6:39	AMAR382.9.20160327T063953Z.wav_chan0.xml	0
27/03/2016 6:54	AMAR382.9.20160327T065420Z.wav_chan0.xml	0
27/03/2016 7:08	AMAR382.9.20160327T070847Z.wav_chan0.xml	0
27/03/2016 7:23	AMAR382.9.20160327T072314Z.wav_chan0.xml	0
27/03/2016 7:37	AMAR382.9.20160327T073741Z.wav_chan0.xml	0
27/03/2016 7:52	AMAR382.9.20160327T075208Z.wav_chan0.xml	0
27/03/2016 8:06	AMAR382.9.20160327T080635Z.wav_chan0.xml	0
27/03/2016 8:21	AMAR382.9.20160327T082102Z.wav_chan0.xml	0
27/03/2016 8:35	AMAR382.9.20160327T083529Z.wav_chan0.xml	0
27/03/2016 8:49	AMAR382.9.20160327T084956Z.wav_chan0.xml	0
27/03/2016 9:04	AMAR382.9.20160327T090423Z.wav_chan0.xml	0
27/03/2016 9:18	AMAR382.9.20160327T091850Z.wav_chan0.xml	0
27/03/2016 9:33	AMAR382.9.20160327T093317Z.wav_chan0.xml	0
27/03/2016 9:47	AMAR382.9.20160327T094744Z.wav_chan0.xml	0
27/03/2016 10:02	AMAR382.9.20160327T100211Z.wav_chan0.xml	0
27/03/2016 10:16	AMAR382.9.20160327T101638Z.wav_chan0.xml	0
27/03/2016 10:31	AMAR382.9.20160327T103105Z.wav_chan0.xml	0
27/03/2016 10:45	AMAR382.9.20160327T104532Z.wav_chan0.xml	0
27/03/2016 10:59	AMAR382.9.20160327T105959Z.wav_chan0.xml	0
27/03/2016 11:14	AMAR382.9.20160327T111426Z.wav_chan0.xml	0
27/03/2016 11:28	AMAR382.9.20160327T112853Z.wav_chan0.xml	0
27/03/2016 11:43	AMAR382.9.20160327T114320Z.wav_chan0.xml	0
27/03/2016 11:57	AMAR382.9.20160327T115747Z.wav_chan0.xml	0
27/03/2016 12:12	AMAR382.9.20160327T121214Z.wav_chan0.xml	0
27/03/2016 12:26	AMAR382.9.20160327T122641Z.wav_chan0.xml	0
27/03/2016 12:41	AMAR382.9.20160327T124108Z.wav_chan0.xml	0
27/03/2016 12:55	AMAR382.9.20160327T125535Z.wav_chan0.xml	0
27/03/2016 13:10	AMAR382.9.20160327T131002Z.wav_chan0.xml	0
27/03/2016 13:24	AMAR382.9.20160327T132429Z.wav_chan0.xml	0
27/03/2016 13:38	AMAR382.9.20160327T133856Z.wav_chan0.xml	0
27/03/2016 13:53	AMAR382.9.20160327T135323Z.wav_chan0.xml	0
27/03/2016 14:07	AMAR382.9.20160327T140750Z.wav_chan0.xml	0
27/03/2016 14:22	AMAR382.9.20160327T142217Z.wav_chan0.xml	0
27/03/2016 14:36	AMAR382.9.20160327T143644Z.wav_chan0.xml	0
27/03/2016 14:51	AMAR382.9.20160327T145111Z.wav_chan0.xml	0
27/03/2016 15:05	AMAR382.9.20160327T150538Z.wav_chan0.xml	0
27/03/2016 15:20	AMAR382.9.20160327T152005Z.wav_chan0.xml	0
27/03/2016 15:34	AMAR382.9.20160327T153432Z.wav_chan0.xml	0
27/03/2016 15:48	AMAR382.9.20160327T154859Z.wav_chan0.xml	0
27/03/2016 16:03	AMAR382.9.20160327T160326Z.wav_chan0.xml	0
27/03/2016 16:17	AMAR382.9.20160327T161753Z.wav_chan0.xml	0
27/03/2016 16:32	AMAR382.9.20160327T163220Z.wav_chan0.xml	0
27/03/2016 16:46	AMAR382.9.20160327T164647Z.wav_chan0.xml	0
27/03/2016 17:01	AMAR382.9.20160327T170114Z.wav_chan0.xml	0
27/03/2016 17:15	AMAR382.9.20160327T171541Z.wav_chan0.xml	0
27/03/2016 17:30	AMAR382.9.20160327T173008Z.wav_chan0.xml	0
27/03/2016 17:44	AMAR382.9.20160327T174435Z.wav_chan0.xml	0
27/03/2016 17:59	AMAR382.9.20160327T175902Z.wav_chan0.xml	0
27/03/2016 18:13	AMAR382.9.20160327T181329Z.wav_chan0.xml	0
27/03/2016 18:27	AMAR382.9.20160327T182756Z.wav_chan0.xml	0
27/03/2016 18:42	AMAR382.9.20160327T184223Z.wav_chan0.xml	0
27/03/2016 18:56	AMAR382.9.20160327T185650Z.wav_chan0.xml	0
27/03/2016 19:11	AMAR382.9.20160327T191117Z.wav_chan0.xml	0
27/03/2016 19:25	AMAR382.9.20160327T192544Z.wav_chan0.xml	0
27/03/2016 19:40	AMAR382.9.20160327T194011Z.wav_chan0.xml	0
27/03/2016 19:54	AMAR382.9.20160327T195438Z.wav_chan0.xml	0
27/03/2016 20:09	AMAR382.9.20160327T200905Z.wav_chan0.xml	0
27/03/2016 20:23	AMAR382.9.20160327T202332Z.wav_chan0.xml	0
27/03/2016 20:37	AMAR382.9.20160327T203759Z.wav_chan0.xml	0
27/03/2016 20:52	AMAR382.9.20160327T205226Z.wav_chan0.xml	0
27/03/2016 21:06	AMAR382.9.20160327T210653Z.wav_chan0.xml	0
27/03/2016 21:21	AMAR382.9.20160327T212120Z.wav_chan0.xml	0
27/03/2016 21:35	AMAR382.9.20160327T213547Z.wav_chan0.xml	0
27/03/2016 21:50	AMAR382.9.20160327T215014Z.wav_chan0.xml	0
27/03/2016 22:04	AMAR382.9.20160327T220441Z.wav_chan0.xml	0
27/03/2016 22:19	AMAR382.9.20160327T221908Z.wav_chan0.xml	0
27/03/2016 22:33	AMAR382.9.20160327T223335Z.wav_chan0.xml	0
27/03/2016 22:48	AMAR382.9.20160327T224802Z.wav_chan0.xml	0
27/03/2016 23:02	AMAR382.9.20160327T230229Z.wav_chan0.xml	0
27/03/2016 23:16	AMAR382.9.20160327T231656Z.wav_chan0.xml	0
27/03/2016 23:31	AMAR382.9.20160327T233123Z.wav_chan0.xml	0
27/03/2016 23:45	AMAR382.9.20160327T234550Z.wav_chan0.xml	0
28/03/2016 0:00	AMAR382.9.20160328T000017Z.wav_chan0.xml	0
28/03/2016 0:14	AMAR382.9.20160328T001444Z.wav_chan0.xml	0
28/03/2016 0:29	AMAR382.9.20160328T002911Z.wav_chan0.xml	0
28/03/2016 0:43	AMAR382.9.20160328T004338Z.wav_chan0.xml	0
28/03/2016 0:58	AMAR382.9.20160328T005805Z.wav_chan0.xml	0
28/03/2016 1:12	AMAR382.9.20160328T011232Z.wav_chan0.xml	0
28/03/2016 1:26	AMAR382.9.20160328T012659Z.wav_chan0.xml	0
28/03/2016 1:41	AMAR382.9.20160328T014126Z.wav_chan0.xml	0
28/03/2016 1:55	AMAR382.9.20160328T015553Z.wav_chan0.xml	0
28/03/2016 2:10	AMAR382.9.20160328T021020Z.wav_chan0.xml	0
28/03/2016 2:24	AMAR382.9.20160328T022447Z.wav_chan0.xml	0
28/03/2016 2:39	AMAR382.9.20160328T023914Z.wav_chan0.xml	0
28/03/2016 2:53	AMAR382.9.20160328T025341Z.wav_chan0.xml	0
28/03/2016 3:08	AMAR382.9.20160328T030808Z.wav_chan0.xml	0
28/03/2016 3:22	AMAR382.9.20160328T032235Z.wav_chan0.xml	0
28/03/2016 3:37	AMAR382.9.20160328T033702Z.wav_chan0.xml	0
28/03/2016 3:51	AMAR382.9.20160328T035129Z.wav_chan0.xml	0
28/03/2016 4:05	AMAR382.9.20160328T040556Z.wav_chan0.xml	0
28/03/2016 4:20	AMAR382.9.20160328T042023Z.wav_chan0.xml	0
28/03/2016 4:34	AMAR382.9.20160328T043450Z.wav_chan0.xml	0
28/03/2016 4:49	AMAR382.9.20160328T044917Z.wav_chan0.xml	0
28/03/2016 5:03	AMAR382.9.20160328T050344Z.wav_chan0.xml	0
28/03/2016 5:18	AMAR382.9.20160328T051811Z.wav_chan0.xml	0
28/03/2016 5:32	AMAR382.9.20160328T053238Z.wav_chan0.xml	0
28/03/2016 5:47	AMAR382.9.20160328T054705Z.wav_chan0.xml	0
28/03/2016 6:01	AMAR382.9.20160328T060132Z.wav_chan0.xml	0
28/03/2016 6:15	AMAR382.9.20160328T061559Z.wav_chan0.xml	0
28/03/2016 6:30	AMAR382.9.20160328T063026Z.wav_chan0.xml	0
28/03/2016 6:44	AMAR382.9.20160328T064453Z.wav_chan0.xml	0
28/03/2016 6:59	AMAR382.9.20160328T065920Z.wav_chan0.xml	0
28/03/2016 7:13	AMAR382.9.20160328T071347Z.wav_chan0.xml	0
28/03/2016 7:28	AMAR382.9.20160328T072814Z.wav_chan0.xml	0
28/03/2016 7:42	AMAR382.9.20160328T074241Z.wav_chan0.xml	0
28/03/2016 7:57	AMAR382.9.20160328T075708Z.wav_chan0.xml	0
28/03/2016 8:11	AMAR382.9.20160328T081135Z.wav_chan0.xml	0
28/03/2016 8:26	AMAR382.9.20160328T082602Z.wav_chan0.xml	0
28/03/2016 8:40	AMAR382.9.20160328T084029Z.wav_chan0.xml	0
28/03/2016 8:54	AMAR382.9.20160328T085456Z.wav_chan0.xml	0
28/03/2016 9:09	AMAR382.9.20160328T090923Z.wav_chan0.xml	0
28/03/2016 9:23	AMAR382.9.20160328T092350Z.wav_chan0.xml	0
28/03/2016 9:38	AMAR382.9.20160328T093817Z.wav_chan0.xml	0
28/03/2016 9:52	AMAR382.9.20160328T095244Z.wav_chan0.xml	0
28/03/2016 10:07	AMAR382.9.20160328T100711Z.wav_chan0.xml	0
28/03/2016 10:21	AMAR382.9.20160328T102138Z.wav_chan0.xml	0
28/03/2016 10:36	AMAR382.9.20160328T103605Z.wav_chan0.xml	0
28/03/2016 10:50	AMAR382.9.20160328T105032Z.wav_chan0.xml	0
28/03/2016 11:04	AMAR382.9.20160328T110459Z.wav_chan0.xml	0
28/03/2016 11:19	AMAR382.9.20160328T111926Z.wav_chan0.xml	0
28/03/2016 11:33	AMAR382.9.20160328T113353Z.wav_chan0.xml	0
28/03/2016 11:48	AMAR382.9.20160328T114820Z.wav_chan0.xml	0
28/03/2016 12:02	AMAR382.9.20160328T120247Z.wav_chan0.xml	0
28/03/2016 12:17	AMAR382.9.20160328T121714Z.wav_chan0.xml	0
28/03/2016 12:31	AMAR382.9.20160328T123141Z.wav_chan0.xml	0
28/03/2016 12:46	AMAR382.9.20160328T124608Z.wav_chan0.xml	0
28/03/2016 13:00	AMAR382.9.20160328T130035Z.wav_chan0.xml	0
28/03/2016 13:15	AMAR382.9.20160328T131502Z.wav_chan0.xml	0
28/03/2016 13:29	AMAR382.9.20160328T132929Z.wav_chan0.xml	0
28/03/2016 13:43	AMAR382.9.20160328T134356Z.wav_chan0.xml	0
28/03/2016 13:58	AMAR382.9.20160328T135823Z.wav_chan0.xml	0
28/03/2016 14:12	AMAR382.9.20160328T141250Z.wav_chan0.xml	0
28/03/2016 14:27	AMAR382.9.20160328T142717Z.wav_chan0.xml	0
28/03/2016 14:41	AMAR382.9.20160328T144144Z.wav_chan0.xml	0
28/03/2016 14:56	AMAR382.9.20160328T145611Z.wav_chan0.xml	0
28/03/2016 15:10	AMAR382.9.20160328T151038Z.wav_chan0.xml	0
28/03/2016 15:25	AMAR382.9.20160328T152505Z.wav_chan0.xml	0
28/03/2016 15:39	AMAR382.9.20160328T153932Z.wav_chan0.xml	0
28/03/2016 15:53	AMAR382.9.20160328T155359Z.wav_chan0.xml	0
28/03/2016 16:08	AMAR382.9.20160328T160826Z.wav_chan0.xml	0
28/03/2016 16:22	AMAR382.9.20160328T162253Z.wav_chan0.xml	0
28/03/2016 16:37	AMAR382.9.20160328T163720Z.wav_chan0.xml	0
28/03/2016 16:51	AMAR382.9.20160328T165147Z.wav_chan0.xml	0
28/03/2016 17:06	AMAR382.9.20160328T170614Z.wav_chan0.xml	0
28/03/2016 17:20	AMAR382.9.20160328T172041Z.wav_chan0.xml	0
28/03/2016 17:35	AMAR382.9.20160328T173508Z.wav_chan0.xml	0
28/03/2016 17:49	AMAR382.9.20160328T174935Z.wav_chan0.xml	0
28/03/2016 18:04	AMAR382.9.20160328T180402Z.wav_chan0.xml	0
28/03/2016 18:18	AMAR382.9.20160328T181829Z.wav_chan0.xml	0
28/03/2016 18:32	AMAR382.9.20160328T183256Z.wav_chan0.xml	0
28/03/2016 18:47	AMAR382.9.20160328T184723Z.wav_chan0.xml	0
28/03/2016 19:01	AMAR382.9.20160328T190150Z.wav_chan0.xml	0
28/03/2016 19:16	AMAR382.9.20160328T191617Z.wav_chan0.xml	0
28/03/2016 19:30	AMAR382.9.20160328T193044Z.wav_chan0.xml	0
28/03/2016 19:45	AMAR382.9.20160328T194511Z.wav_chan0.xml	0
28/03/2016 19:59	AMAR382.9.20160328T195938Z.wav_chan0.xml	0
28/03/2016 20:14	AMAR382.9.20160328T201405Z.wav_chan0.xml	0
28/03/2016 20:28	AMAR382.9.20160328T202832Z.wav_chan0.xml	0
28/03/2016 20:42	AMAR382.9.20160328T204259Z.wav_chan0.xml	0
28/03/2016 20:57	AMAR382.9.20160328T205726Z.wav_chan0.xml	0
28/03/2016 21:11	AMAR382.9.20160328T211153Z.wav_chan0.xml	0
28/03/2016 21:26	AMAR382.9.20160328T212620Z.wav_chan0.xml	0
28/03/2016 21:40	AMAR382.9.20160328T214047Z.wav_chan0.xml	0
28/03/2016 21:55	AMAR382.9.20160328T215514Z.wav_chan0.xml	0
28/03/2016 22:09	AMAR382.9.20160328T220941Z.wav_chan0.xml	0
28/03/2016 22:24	AMAR382.9.20160328T222408Z.wav_chan0.xml	0
28/03/2016 22:38	AMAR382.9.20160328T223835Z.wav_chan0.xml	0
28/03/2016 22:53	AMAR382.9.20160328T225302Z.wav_chan0.xml	0
28/03/2016 23:07	AMAR382.9.20160328T230729Z.wav_chan0.xml	0
28/03/2016 23:21	AMAR382.9.20160328T232156Z.wav_chan0.xml	0
28/03/2016 23:36	AMAR382.9.20160328T233623Z.wav_chan0.xml	0
28/03/2016 23:50	AMAR382.9.20160328T235050Z.wav_chan0.xml	0
29/03/2016 0:05	AMAR382.9.20160329T000517Z.wav_chan0.xml	0
29/03/2016 0:19	AMAR382.9.20160329T001944Z.wav_chan0.xml	0
29/03/2016 0:34	AMAR382.9.20160329T003411Z.wav_chan0.xml	0
29/03/2016 0:48	AMAR382.9.20160329T004838Z.wav_chan0.xml	0
29/03/2016 1:03	AMAR382.9.20160329T010305Z.wav_chan0.xml	0
29/03/2016 1:17	AMAR382.9.20160329T011732Z.wav_chan0.xml	0
29/03/2016 1:31	AMAR382.9.20160329T013159Z.wav_chan0.xml	0
29/03/2016 1:46	AMAR382.9.20160329T014626Z.wav_chan0.xml	0
29/03/2016 2:00	AMAR382.9.20160329T020053Z.wav_chan0.xml	0
29/03/2016 2:15	AMAR382.9.20160329T021520Z.wav_chan0.xml	0
29/03/2016 2:29	AMAR382.9.20160329T022947Z.wav_chan0.xml	0
29/03/2016 2:44	AMAR382.9.20160329T024414Z.wav_chan0.xml	0
29/03/2016 2:58	AMAR382.9.20160329T025841Z.wav_chan0.xml	0
29/03/2016 3:13	AMAR382.9.20160329T031308Z.wav_chan0.xml	0
29/03/2016 3:27	AMAR382.9.20160329T032735Z.wav_chan0.xml	0
29/03/2016 3:42	AMAR382.9.20160329T034202Z.wav_chan0.xml	0
29/03/2016 3:56	AMAR382.9.20160329T035629Z.wav_chan0.xml	0
29/03/2016 4:10	AMAR382.9.20160329T041056Z.wav_chan0.xml	0
29/03/2016 4:25	AMAR382.9.20160329T042523Z.wav_chan0.xml	0
29/03/2016 4:39	AMAR382.9.20160329T043950Z.wav_chan0.xml	0
29/03/2016 4:54	AMAR382.9.20160329T045417Z.wav_chan0.xml	0
29/03/2016 5:08	AMAR382.9.20160329T050844Z.wav_chan0.xml	0
29/03/2016 5:23	AMAR382.9.20160329T052311Z.wav_chan0.xml	0
29/03/2016 5:37	AMAR382.9.20160329T053738Z.wav_chan0.xml	0
29/03/2016 5:52	AMAR382.9.20160329T055205Z.wav_chan0.xml	0
29/03/2016 6:06	AMAR382.9.20160329T060632Z.wav_chan0.xml	0
29/03/2016 6:20	AMAR382.9.20160329T062059Z.wav_chan0.xml	0
29/03/2016 6:35	AMAR382.9.20160329T063526Z.wav_chan0.xml	0
29/03/2016 6:49	AMAR382.9.20160329T064953Z.wav_chan0.xml	0
29/03/2016 7:04	AMAR382.9.20160329T070420Z.wav_chan0.xml	0
29/03/2016 7:18	AMAR382.9.20160329T071847Z.wav_chan0.xml	0
29/03/2016 7:33	AMAR382.9.20160329T073314Z.wav_chan0.xml	0
29/03/2016 7:47	AMAR382.9.20160329T074741Z.wav_chan0.xml	0
29/03/2016 8:02	AMAR382.9.20160329T080208Z.wav_chan0.xml	0
29/03/2016 8:16	AMAR382.9.20160329T081635Z.wav_chan0.xml	0
29/03/2016 8:31	AMAR382.9.20160329T083102Z.wav_chan0.xml	0
29/03/2016 8:45	AMAR382.9.20160329T084529Z.wav_chan0.xml	0
29/03/2016 8:59	AMAR382.9.20160329T085956Z.wav_chan0.xml	0
29/03/2016 9:14	AMAR382.9.20160329T091423Z.wav_chan0.xml	0
29/03/2016 9:28	AMAR382.9.20160329T092850Z.wav_chan0.xml	0
29/03/2016 9:43	AMAR382.9.20160329T094317Z.wav_chan0.xml	0
29/03/2016 9:57	AMAR382.9.20160329T095744Z.wav_chan0.xml	0
29/03/2016 10:12	AMAR382.9.20160329T101211Z.wav_chan0.xml	0
29/03/2016 10:26	AMAR382.9.20160329T102638Z.wav_chan0.xml	0
29/03/2016 10:41	AMAR382.9.20160329T104105Z.wav_chan0.xml	0
29/03/2016 10:55	AMAR382.9.20160329T105532Z.wav_chan0.xml	0
29/03/2016 11:09	AMAR382.9.20160329T110959Z.wav_chan0.xml	0
29/03/2016 11:24	AMAR382.9.20160329T112426Z.wav_chan0.xml	0
29/03/2016 11:38	AMAR382.9.20160329T113853Z.wav_chan0.xml	0
29/03/2016 11:53	AMAR382.9.20160329T115320Z.wav_chan0.xml	0
29/03/2016 12:07	AMAR382.9.20160329T120747Z.wav_chan0.xml	0
29/03/2016 12:22	AMAR382.9.20160329T122214Z.wav_chan0.xml	0
29/03/2016 12:36	AMAR382.9.20160329T123641Z.wav_chan0.xml	0
29/03/2016 12:51	AMAR382.9.20160329T125108Z.wav_chan0.xml	0
29/03/2016 13:05	AMAR382.9.20160329T130535Z.wav_chan0.xml	0
29/03/2016 13:20	AMAR382.9.20160329T132002Z.wav_chan0.xml	0
29/03/2016 13:34	AMAR382.9.20160329T133429Z.wav_chan0.xml	0
29/03/2016 13:48	AMAR382.9.20160329T134856Z.wav_chan0.xml	0
29/03/2016 14:03	AMAR382.9.20160329T140323Z.wav_chan0.xml	0
29/03/2016 14:17	AMAR382.9.20160329T141750Z.wav_chan0.xml	0
29/03/2016 14:32	AMAR382.9.20160329T143217Z.wav_chan0.xml	0
29/03/2016 14:46	AMAR382.9.20160329T144644Z.wav_chan0.xml	0
29/03/2016 15:01	AMAR382.9.20160329T150111Z.wav_chan0.xml	0
29/03/2016 15:15	AMAR382.9.20160329T151538Z.wav_chan0.xml	0
29/03/2016 15:30	AMAR382.9.20160329T153005Z.wav_chan0.xml	0
29/03/2016 15:44	AMAR382.9.20160329T154432Z.wav_chan0.xml	0
29/03/2016 15:58	AMAR382.9.20160329T155859Z.wav_chan0.xml	0
29/03/2016 16:13	AMAR382.9.20160329T161326Z.wav_chan0.xml	0
29/03/2016 16:27	AMAR382.9.20160329T162753Z.wav_chan0.xml	0
29/03/2016 16:42	AMAR382.9.20160329T164220Z.wav_chan0.xml	0
29/03/2016 16:56	AMAR382.9.20160329T165647Z.wav_chan0.xml	0
29/03/2016 17:11	AMAR382.9.20160329T171114Z.wav_chan0.xml	0
29/03/2016 17:25	AMAR382.9.20160329T172541Z.wav_chan0.xml	0
29/03/2016 17:40	AMAR382.9.20160329T174008Z.wav_chan0.xml	0
29/03/2016 17:54	AMAR382.9.20160329T175435Z.wav_chan0.xml	0
29/03/2016 18:09	AMAR382.9.20160329T180902Z.wav_chan0.xml	0
29/03/2016 18:23	AMAR382.9.20160329T182329Z.wav_chan0.xml	0
29/03/2016 18:37	AMAR382.9.20160329T183756Z.wav_chan0.xml	0
29/03/2016 18:52	AMAR382.9.20160329T185223Z.wav_chan0.xml	0
29/03/2016 19:06	AMAR382.9.20160329T190650Z.wav_chan0.xml	0
29/03/2016 19:21	AMAR382.9.20160329T192117Z.wav_chan0.xml	0
29/03/2016 19:35	AMAR382.9.20160329T193544Z.wav_chan0.xml	0
29/03/2016 19:50	AMAR382.9.20160329T195011Z.wav_chan0.xml	0
29/03/2016 20:04	AMAR382.9.20160329T200438Z.wav_chan0.xml	0
29/03/2016 20:19	AMAR382.9.20160329T201905Z.wav_chan0.xml	0
29/03/2016 20:33	AMAR382.9.20160329T203332Z.wav_chan0.xml	0
29/03/2016 20:47	AMAR382.9.20160329T204759Z.wav_chan0.xml	0
29/03/2016 21:02	AMAR382.9.20160329T210226Z.wav_chan0.xml	0
29/03/2016 21:16	AMAR382.9.20160329T211653Z.wav_chan0.xml	0
29/03/2016 21:31	AMAR382.9.20160329T213120Z.wav_chan0.xml	0
29/03/2016 21:45	AMAR382.9.20160329T214547Z.wav_chan0.xml	0
29/03/2016 22:00	AMAR382.9.20160329T220014Z.wav_chan0.xml	0
29/03/2016 22:14	AMAR382.9.20160329T221441Z.wav_chan0.xml	0
29/03/2016 22:29	AMAR382.9.20160329T222908Z.wav_chan0.xml	0
29/03/2016 22:43	AMAR382.9.20160329T224335Z.wav_chan0.xml	0
29/03/2016 22:58	AMAR382.9.20160329T225802Z.wav_chan0.xml	0
29/03/2016 23:12	AMAR382.9.20160329T231229Z.wav_chan0.xml	0
29/03/2016 23:26	AMAR382.9.20160329T232656Z.wav_chan0.xml	0
29/03/2016 23:41	AMAR382.9.20160329T234123Z.wav_chan0.xml	0
29/03/2016 23:55	AMAR382.9.20160329T235550Z.wav_chan0.xml	0
30/03/2016 0:10	AMAR382.9.20160330T001017Z.wav_chan0.xml	0
30/03/2016 0:24	AMAR382.9.20160330T002444Z.wav_chan0.xml	0
30/03/2016 0:39	AMAR382.9.20160330T003911Z.wav_chan0.xml	0
30/03/2016 0:53	AMAR382.9.20160330T005338Z.wav_chan0.xml	0
30/03/2016 1:08	AMAR382.9.20160330T010805Z.wav_chan0.xml	0
30/03/2016 1:22	AMAR382.9.20160330T012232Z.wav_chan0.xml	0
30/03/2016 1:36	AMAR382.9.20160330T013659Z.wav_chan0.xml	0
30/03/2016 1:51	AMAR382.9.20160330T015126Z.wav_chan0.xml	0
30/03/2016 2:05	AMAR382.9.20160330T020553Z.wav_chan0.xml	0
30/03/2016 2:20	AMAR382.9.20160330T022020Z.wav_chan0.xml	0
30/03/2016 2:34	AMAR382.9.20160330T023447Z.wav_chan0.xml	0
30/03/2016 2:49	AMAR382.9.20160330T024914Z.wav_chan0.xml	0
30/03/2016 3:03	AMAR382.9.20160330T030341Z.wav_chan0.xml	0
30/03/2016 3:18	AMAR382.9.20160330T031808Z.wav_chan0.xml	0
30/03/2016 3:32	AMAR382.9.20160330T033235Z.wav_chan0.xml	0
30/03/2016 3:47	AMAR382.9.20160330T034702Z.wav_chan0.xml	0
30/03/2016 4:01	AMAR382.9.20160330T040129Z.wav_chan0.xml	0
30/03/2016 4:15	AMAR382.9.20160330T041556Z.wav_chan0.xml	0
30/03/2016 4:30	AMAR382.9.20160330T043023Z.wav_chan0.xml	0
30/03/2016 4:44	AMAR382.9.20160330T044450Z.wav_chan0.xml	0
30/03/2016 4:59	AMAR382.9.20160330T045917Z.wav_chan0.xml	0
30/03/2016 5:13	AMAR382.9.20160330T051344Z.wav_chan0.xml	0
30/03/2016 5:28	AMAR382.9.20160330T052811Z.wav_chan0.xml	0
30/03/2016 5:42	AMAR382.9.20160330T054238Z.wav_chan0.xml	0
30/03/2016 5:57	AMAR382.9.20160330T055705Z.wav_chan0.xml	0
30/03/2016 6:11	AMAR382.9.20160330T061132Z.wav_chan0.xml	0
30/03/2016 6:25	AMAR382.9.20160330T062559Z.wav_chan0.xml	0
30/03/2016 6:40	AMAR382.9.20160330T064026Z.wav_chan0.xml	0
30/03/2016 6:54	AMAR382.9.20160330T065453Z.wav_chan0.xml	0
30/03/2016 7:09	AMAR382.9.20160330T070920Z.wav_chan0.xml	0
30/03/2016 7:23	AMAR382.9.20160330T072347Z.wav_chan0.xml	0
30/03/2016 7:38	AMAR382.9.20160330T073814Z.wav_chan0.xml	0
30/03/2016 7:52	AMAR382.9.20160330T075241Z.wav_chan0.xml	0
30/03/2016 8:07	AMAR382.9.20160330T080708Z.wav_chan0.xml	0
30/03/2016 8:21	AMAR382.9.20160330T082135Z.wav_chan0.xml	0
30/03/2016 8:36	AMAR382.9.20160330T083602Z.wav_chan0.xml	0
30/03/2016 8:50	AMAR382.9.20160330T085029Z.wav_chan0.xml	0
30/03/2016 9:04	AMAR382.9.20160330T090456Z.wav_chan0.xml	0
30/03/2016 9:19	AMAR382.9.20160330T091923Z.wav_chan0.xml	0
30/03/2016 9:33	AMAR382.9.20160330T093350Z.wav_chan0.xml	0
30/03/2016 9:48	AMAR382.9.20160330T094817Z.wav_chan0.xml	0
30/03/2016 10:02	AMAR382.9.20160330T100244Z.wav_chan0.xml	0
30/03/2016 10:17	AMAR382.9.20160330T101711Z.wav_chan0.xml	0
30/03/2016 10:31	AMAR382.9.20160330T103138Z.wav_chan0.xml	0
30/03/2016 10:46	AMAR382.9.20160330T104605Z.wav_chan0.xml	0
30/03/2016 11:00	AMAR382.9.20160330T110032Z.wav_chan0.xml	0
30/03/2016 11:14	AMAR382.9.20160330T111459Z.wav_chan0.xml	0
30/03/2016 11:29	AMAR382.9.20160330T112926Z.wav_chan0.xml	0
30/03/2016 11:43	AMAR382.9.20160330T114353Z.wav_chan0.xml	0
30/03/2016 11:58	AMAR382.9.20160330T115820Z.wav_chan0.xml	0
30/03/2016 12:12	AMAR382.9.20160330T121247Z.wav_chan0.xml	0
30/03/2016 12:27	AMAR382.9.20160330T122714Z.wav_chan0.xml	0
30/03/2016 12:41	AMAR382.9.20160330T124141Z.wav_chan0.xml	0
30/03/2016 12:56	AMAR382.9.20160330T125608Z.wav_chan0.xml	0
30/03/2016 13:10	AMAR382.9.20160330T131035Z.wav_chan0.xml	0
30/03/2016 13:25	AMAR382.9.20160330T132502Z.wav_chan0.xml	0
30/03/2016 13:39	AMAR382.9.20160330T133929Z.wav_chan0.xml	0
30/03/2016 13:53	AMAR382.9.20160330T135356Z.wav_chan0.xml	0
30/03/2016 14:08	AMAR382.9.20160330T140823Z.wav_chan0.xml	0
30/03/2016 14:22	AMAR382.9.20160330T142250Z.wav_chan0.xml	0
30/03/2016 14:37	AMAR382.9.20160330T143717Z.wav_chan0.xml	0
30/03/2016 14:51	AMAR382.9.20160330T145144Z.wav_chan0.xml	0
30/03/2016 15:06	AMAR382.9.20160330T150611Z.wav_chan0.xml	0
30/03/2016 15:20	AMAR382.9.20160330T152038Z.wav_chan0.xml	0
30/03/2016 15:35	AMAR382.9.20160330T153505Z.wav_chan0.xml	0
30/03/2016 15:49	AMAR382.9.20160330T154932Z.wav_chan0.xml	0
30/03/2016 16:03	AMAR382.9.20160330T160359Z.wav_chan0.xml	0
30/03/2016 16:18	AMAR382.9.20160330T161826Z.wav_chan0.xml	0
30/03/2016 16:32	AMAR382.9.20160330T163253Z.wav_chan0.xml	0
30/03/2016 16:47	AMAR382.9.20160330T164720Z.wav_chan0.xml	0
30/03/2016 17:01	AMAR382.9.20160330T170147Z.wav_chan0.xml	0
30/03/2016 17:16	AMAR382.9.20160330T171614Z.wav_chan0.xml	0
30/03/2016 17:30	AMAR382.9.20160330T173041Z.wav_chan0.xml	0
30/03/2016 17:45	AMAR382.9.20160330T174508Z.wav_chan0.xml	0
30/03/2016 17:59	AMAR382.9.20160330T175935Z.wav_chan0.xml	0
30/03/2016 18:14	AMAR382.9.20160330T181402Z.wav_chan0.xml	0
30/03/2016 18:28	AMAR382.9.20160330T182829Z.wav_chan0.xml	0
30/03/2016 18:42	AMAR382.9.20160330T184256Z.wav_chan0.xml	0
30/03/2016 18:57	AMAR382.9.20160330T185723Z.wav_chan0.xml	0
30/03/2016 19:11	AMAR382.9.20160330T191150Z.wav_chan0.xml	0
30/03/2016 19:26	AMAR382.9.20160330T192617Z.wav_chan0.xml	0
30/03/2016 19:40	AMAR382.9.20160330T194044Z.wav_chan0.xml	0
30/03/2016 19:55	AMAR382.9.20160330T195511Z.wav_chan0.xml	0
30/03/2016 20:09	AMAR382.9.20160330T200938Z.wav_chan0.xml	0
30/03/2016 20:24	AMAR382.9.20160330T202405Z.wav_chan0.xml	0
30/03/2016 20:38	AMAR382.9.20160330T203832Z.wav_chan0.xml	0
30/03/2016 20:52	AMAR382.9.20160330T205259Z.wav_chan0.xml	0
30/03/2016 21:07	AMAR382.9.20160330T210726Z.wav_chan0.xml	0
30/03/2016 21:21	AMAR382.9.20160330T212153Z.wav_chan0.xml	0
30/03/2016 21:36	AMAR382.9.20160330T213620Z.wav_chan0.xml	0
30/03/2016 21:50	AMAR382.9.20160330T215047Z.wav_chan0.xml	0
30/03/2016 22:05	AMAR382.9.20160330T220514Z.wav_chan0.xml	0
30/03/2016 22:19	AMAR382.9.20160330T221941Z.wav_chan0.xml	0
30/03/2016 22:34	AMAR382.9.20160330T223408Z.wav_chan0.xml	0
30/03/2016 22:48	AMAR382.9.20160330T224835Z.wav_chan0.xml	0
30/03/2016 23:03	AMAR382.9.20160330T230302Z.wav_chan0.xml	0
30/03/2016 23:17	AMAR382.9.20160330T231729Z.wav_chan0.xml	0
30/03/2016 23:31	AMAR382.9.20160330T233156Z.wav_chan0.xml	0
30/03/2016 23:46	AMAR382.9.20160330T234623Z.wav_chan0.xml	0
31/03/2016 0:00	AMAR382.9.20160331T000050Z.wav_chan0.xml	0
31/03/2016 0:15	AMAR382.9.20160331T001517Z.wav_chan0.xml	0
31/03/2016 0:29	AMAR382.9.20160331T002944Z.wav_chan0.xml	0
31/03/2016 0:44	AMAR382.9.20160331T004411Z.wav_chan0.xml	0
31/03/2016 0:58	AMAR382.9.20160331T005838Z.wav_chan0.xml	0
31/03/2016 1:13	AMAR382.9.20160331T011305Z.wav_chan0.xml	0
31/03/2016 1:27	AMAR382.9.20160331T012732Z.wav_chan0.xml	0
31/03/2016 1:41	AMAR382.9.20160331T014159Z.wav_chan0.xml	0
31/03/2016 1:56	AMAR382.9.20160331T015626Z.wav_chan0.xml	0
31/03/2016 2:10	AMAR382.9.20160331T021053Z.wav_chan0.xml	0
31/03/2016 2:25	AMAR382.9.20160331T022520Z.wav_chan0.xml	0
31/03/2016 2:39	AMAR382.9.20160331T023947Z.wav_chan0.xml	0
31/03/2016 2:54	AMAR382.9.20160331T025414Z.wav_chan0.xml	0
31/03/2016 3:08	AMAR382.9.20160331T030841Z.wav_chan0.xml	0
31/03/2016 3:23	AMAR382.9.20160331T032308Z.wav_chan0.xml	0
31/03/2016 3:37	AMAR382.9.20160331T033735Z.wav_chan0.xml	0
31/03/2016 3:52	AMAR382.9.20160331T035202Z.wav_chan0.xml	0
31/03/2016 4:06	AMAR382.9.20160331T040629Z.wav_chan0.xml	0
31/03/2016 4:20	AMAR382.9.20160331T042056Z.wav_chan0.xml	0
31/03/2016 4:35	AMAR382.9.20160331T043523Z.wav_chan0.xml	0
31/03/2016 4:49	AMAR382.9.20160331T044950Z.wav_chan0.xml	0
31/03/2016 5:04	AMAR382.9.20160331T050417Z.wav_chan0.xml	0
31/03/2016 5:18	AMAR382.9.20160331T051844Z.wav_chan0.xml	0
31/03/2016 5:33	AMAR382.9.20160331T053311Z.wav_chan0.xml	0
31/03/2016 5:47	AMAR382.9.20160331T054738Z.wav_chan0.xml	0
31/03/2016 6:02	AMAR382.9.20160331T060205Z.wav_chan0.xml	0
31/03/2016 6:16	AMAR382.9.20160331T061632Z.wav_chan0.xml	0
31/03/2016 6:30	AMAR382.9.20160331T063059Z.wav_chan0.xml	0
31/03/2016 6:45	AMAR382.9.20160331T064526Z.wav_chan0.xml	0
31/03/2016 6:59	AMAR382.9.20160331T065953Z.wav_chan0.xml	0
31/03/2016 7:14	AMAR382.9.20160331T071420Z.wav_chan0.xml	0
31/03/2016 7:28	AMAR382.9.20160331T072847Z.wav_chan0.xml	0
31/03/2016 7:43	AMAR382.9.20160331T074314Z.wav_chan0.xml	0
31/03/2016 7:57	AMAR382.9.20160331T075741Z.wav_chan0.xml	0
31/03/2016 8:12	AMAR382.9.20160331T081208Z.wav_chan0.xml	0
31/03/2016 8:26	AMAR382.9.20160331T082635Z.wav_chan0.xml	0
31/03/2016 8:41	AMAR382.9.20160331T084102Z.wav_chan0.xml	0
31/03/2016 8:55	AMAR382.9.20160331T085529Z.wav_chan0.xml	0
31/03/2016 9:09	AMAR382.9.20160331T090956Z.wav_chan0.xml	0
31/03/2016 9:24	AMAR382.9.20160331T092423Z.wav_chan0.xml	0
31/03/2016 9:38	AMAR382.9.20160331T093850Z.wav_chan0.xml	0
31/03/2016 9:53	AMAR382.9.20160331T095317Z.wav_chan0.xml	0
31/03/2016 10:07	AMAR382.9.20160331T100744Z.wav_chan0.xml	0
31/03/2016 10:22	AMAR382.9.20160331T102211Z.wav_chan0.xml	0
31/03/2016 10:36	AMAR382.9.20160331T103638Z.wav_chan0.xml	0
31/03/2016 10:51	AMAR382.9.20160331T105105Z.wav_chan0.xml	0
31/03/2016 11:05	AMAR382.9.20160331T110532Z.wav_chan0.xml	0
31/03/2016 11:19	AMAR382.9.20160331T111959Z.wav_chan0.xml	0
31/03/2016 11:34	AMAR382.9.20160331T113426Z.wav_chan0.xml	0
31/03/2016 11:48	AMAR382.9.20160331T114853Z.wav_chan0.xml	0
31/03/2016 12:03	AMAR382.9.20160331T120320Z.wav_chan0.xml	0
31/03/2016 12:17	AMAR382.9.20160331T121747Z.wav_chan0.xml	0
31/03/2016 12:32	AMAR382.9.20160331T123214Z.wav_chan0.xml	0
31/03/2016 12:46	AMAR382.9.20160331T124641Z.wav_chan0.xml	0
31/03/2016 13:01	AMAR382.9.20160331T130108Z.wav_chan0.xml	0
31/03/2016 13:15	AMAR382.9.20160331T131535Z.wav_chan0.xml	0
31/03/2016 13:30	AMAR382.9.20160331T133002Z.wav_chan0.xml	0
31/03/2016 13:44	AMAR382.9.20160331T134429Z.wav_chan0.xml	9
31/03/2016 13:58	AMAR382.9.20160331T135856Z.wav_chan0.xml	0
31/03/2016 14:13	AMAR382.9.20160331T141323Z.wav_chan0.xml	0
31/03/2016 14:27	AMAR382.9.20160331T142750Z.wav_chan0.xml	0
31/03/2016 14:42	AMAR382.9.20160331T144217Z.wav_chan0.xml	0
31/03/2016 14:56	AMAR382.9.20160331T145644Z.wav_chan0.xml	0
31/03/2016 15:11	AMAR382.9.20160331T151111Z.wav_chan0.xml	0
31/03/2016 15:25	AMAR382.9.20160331T152538Z.wav_chan0.xml	0
31/03/2016 15:40	AMAR382.9.20160331T154005Z.wav_chan0.xml	0
31/03/2016 15:54	AMAR382.9.20160331T155432Z.wav_chan0.xml	0
31/03/2016 16:08	AMAR382.9.20160331T160859Z.wav_chan0.xml	0
31/03/2016 16:23	AMAR382.9.20160331T162326Z.wav_chan0.xml	0
31/03/2016 16:37	AMAR382.9.20160331T163753Z.wav_chan0.xml	0
31/03/2016 16:52	AMAR382.9.20160331T165220Z.wav_chan0.xml	0
31/03/2016 17:06	AMAR382.9.20160331T170647Z.wav_chan0.xml	0
31/03/2016 17:21	AMAR382.9.20160331T172114Z.wav_chan0.xml	0
31/03/2016 17:35	AMAR382.9.20160331T173541Z.wav_chan0.xml	0
31/03/2016 17:50	AMAR382.9.20160331T175008Z.wav_chan0.xml	0
31/03/2016 18:04	AMAR382.9.20160331T180435Z.wav_chan0.xml	0
31/03/2016 18:19	AMAR382.9.20160331T181902Z.wav_chan0.xml	0
31/03/2016 18:33	AMAR382.9.20160331T183329Z.wav_chan0.xml	0
31/03/2016 18:47	AMAR382.9.20160331T184756Z.wav_chan0.xml	0
31/03/2016 19:02	AMAR382.9.20160331T190223Z.wav_chan0.xml	0
31/03/2016 19:16	AMAR382.9.20160331T191650Z.wav_chan0.xml	0
31/03/2016 19:31	AMAR382.9.20160331T193117Z.wav_chan0.xml	0
31/03/2016 19:45	AMAR382.9.20160331T194544Z.wav_chan0.xml	0
31/03/2016 20:00	AMAR382.9.20160331T200011Z.wav_chan0.xml	0
31/03/2016 20:14	AMAR382.9.20160331T201438Z.wav_chan0.xml	0
31/03/2016 20:29	AMAR382.9.20160331T202905Z.wav_chan0.xml	0
31/03/2016 20:43	AMAR382.9.20160331T204332Z.wav_chan0.xml	0
31/03/2016 20:57	AMAR382.9.20160331T205759Z.wav_chan0.xml	0
31/03/2016 21:12	AMAR382.9.20160331T211226Z.wav_chan0.xml	0
31/03/2016 21:26	AMAR382.9.20160331T212653Z.wav_chan0.xml	0
31/03/2016 21:41	AMAR382.9.20160331T214120Z.wav_chan0.xml	0
31/03/2016 21:55	AMAR382.9.20160331T215547Z.wav_chan0.xml	0
31/03/2016 22:10	AMAR382.9.20160331T221014Z.wav_chan0.xml	0
31/03/2016 22:24	AMAR382.9.20160331T222441Z.wav_chan0.xml	0
31/03/2016 22:39	AMAR382.9.20160331T223908Z.wav_chan0.xml	0
31/03/2016 22:53	AMAR382.9.20160331T225335Z.wav_chan0.xml	0
31/03/2016 23:08	AMAR382.9.20160331T230802Z.wav_chan0.xml	0
31/03/2016 23:22	AMAR382.9.20160331T232229Z.wav_chan0.xml	0
31/03/2016 23:36	AMAR382.9.20160331T233656Z.wav_chan0.xml	0
31/03/2016 23:51	AMAR382.9.20160331T235123Z.wav_chan0.xml	0
01/04/2016 0:05	AMAR382.9.20160401T000550Z.wav_chan0.xml	0
01/04/2016 0:20	AMAR382.9.20160401T002017Z.wav_chan0.xml	0
01/04/2016 0:34	AMAR382.9.20160401T003444Z.wav_chan0.xml	0
01/04/2016 0:49	AMAR382.9.20160401T004911Z.wav_chan0.xml	0
01/04/2016 1:03	AMAR382.9.20160401T010338Z.wav_chan0.xml	0
01/04/2016 1:18	AMAR382.9.20160401T011805Z.wav_chan0.xml	0
01/04/2016 1:32	AMAR382.9.20160401T013232Z.wav_chan0.xml	0
01/04/2016 1:46	AMAR382.9.20160401T014659Z.wav_chan0.xml	0
01/04/2016 2:01	AMAR382.9.20160401T020126Z.wav_chan0.xml	0
01/04/2016 2:15	AMAR382.9.20160401T021553Z.wav_chan0.xml	0
01/04/2016 2:30	AMAR382.9.20160401T023020Z.wav_chan0.xml	0
01/04/2016 2:44	AMAR382.9.20160401T024447Z.wav_chan0.xml	0
01/04/2016 2:59	AMAR382.9.20160401T025914Z.wav_chan0.xml	0
01/04/2016 3:13	AMAR382.9.20160401T031341Z.wav_chan0.xml	0
01/04/2016 3:28	AMAR382.9.20160401T032808Z.wav_chan0.xml	0
01/04/2016 3:42	AMAR382.9.20160401T034235Z.wav_chan0.xml	0
01/04/2016 3:57	AMAR382.9.20160401T035702Z.wav_chan0.xml	0
01/04/2016 4:11	AMAR382.9.20160401T041129Z.wav_chan0.xml	0
01/04/2016 4:25	AMAR382.9.20160401T042556Z.wav_chan0.xml	0
01/04/2016 4:40	AMAR382.9.20160401T044023Z.wav_chan0.xml	0
01/04/2016 4:54	AMAR382.9.20160401T045450Z.wav_chan0.xml	0
01/04/2016 5:09	AMAR382.9.20160401T050917Z.wav_chan0.xml	0
01/04/2016 5:23	AMAR382.9.20160401T052344Z.wav_chan0.xml	0
01/04/2016 5:38	AMAR382.9.20160401T053811Z.wav_chan0.xml	0
01/04/2016 5:52	AMAR382.9.20160401T055238Z.wav_chan0.xml	0
01/04/2016 6:07	AMAR382.9.20160401T060705Z.wav_chan0.xml	0
01/04/2016 6:21	AMAR382.9.20160401T062132Z.wav_chan0.xml	0
01/04/2016 6:35	AMAR382.9.20160401T063559Z.wav_chan0.xml	0
01/04/2016 6:50	AMAR382.9.20160401T065026Z.wav_chan0.xml	0
01/04/2016 7:04	AMAR382.9.20160401T070453Z.wav_chan0.xml	0
01/04/2016 7:19	AMAR382.9.20160401T071920Z.wav_chan0.xml	0
01/04/2016 7:33	AMAR382.9.20160401T073347Z.wav_chan0.xml	0
01/04/2016 7:48	AMAR382.9.20160401T074814Z.wav_chan0.xml	0
01/04/2016 8:02	AMAR382.9.20160401T080241Z.wav_chan0.xml	0
01/04/2016 8:17	AMAR382.9.20160401T081708Z.wav_chan0.xml	0
01/04/2016 8:31	AMAR382.9.20160401T083135Z.wav_chan0.xml	0
01/04/2016 8:46	AMAR382.9.20160401T084602Z.wav_chan0.xml	0
01/04/2016 9:00	AMAR382.9.20160401T090029Z.wav_chan0.xml	0
01/04/2016 9:14	AMAR382.9.20160401T091456Z.wav_chan0.xml	0
01/04/2016 9:29	AMAR382.9.20160401T092923Z.wav_chan0.xml	0
01/04/2016 9:43	AMAR382.9.20160401T094350Z.wav_chan0.xml	0
01/04/2016 9:58	AMAR382.9.20160401T095817Z.wav_chan0.xml	0
01/04/2016 10:12	AMAR382.9.20160401T101244Z.wav_chan0.xml	0
01/04/2016 10:27	AMAR382.9.20160401T102711Z.wav_chan0.xml	0
01/04/2016 10:41	AMAR382.9.20160401T104138Z.wav_chan0.xml	0
01/04/2016 10:56	AMAR382.9.20160401T105605Z.wav_chan0.xml	0
01/04/2016 11:10	AMAR382.9.20160401T111032Z.wav_chan0.xml	0
01/04/2016 11:24	AMAR382.9.20160401T112459Z.wav_chan0.xml	0
01/04/2016 11:39	AMAR382.9.20160401T113926Z.wav_chan0.xml	0
01/04/2016 11:53	AMAR382.9.20160401T115353Z.wav_chan0.xml	0
01/04/2016 12:08	AMAR382.9.20160401T120820Z.wav_chan0.xml	0
01/04/2016 12:22	AMAR382.9.20160401T122247Z.wav_chan0.xml	0
01/04/2016 12:37	AMAR382.9.20160401T123714Z.wav_chan0.xml	0
01/04/2016 12:51	AMAR382.9.20160401T125141Z.wav_chan0.xml	0
01/04/2016 13:06	AMAR382.9.20160401T130608Z.wav_chan0.xml	0
01/04/2016 13:20	AMAR382.9.20160401T132035Z.wav_chan0.xml	0
01/04/2016 13:35	AMAR382.9.20160401T133502Z.wav_chan0.xml	0
01/04/2016 13:49	AMAR382.9.20160401T134929Z.wav_chan0.xml	0
01/04/2016 14:03	AMAR382.9.20160401T140356Z.wav_chan0.xml	0
01/04/2016 14:18	AMAR382.9.20160401T141823Z.wav_chan0.xml	0
01/04/2016 14:32	AMAR382.9.20160401T143250Z.wav_chan0.xml	0
01/04/2016 14:47	AMAR382.9.20160401T144717Z.wav_chan0.xml	0
01/04/2016 15:01	AMAR382.9.20160401T150144Z.wav_chan0.xml	0
01/04/2016 15:16	AMAR382.9.20160401T151611Z.wav_chan0.xml	0
01/04/2016 15:30	AMAR382.9.20160401T153038Z.wav_chan0.xml	0
01/04/2016 15:45	AMAR382.9.20160401T154505Z.wav_chan0.xml	0
01/04/2016 15:59	AMAR382.9.20160401T155932Z.wav_chan0.xml	0
01/04/2016 16:13	AMAR382.9.20160401T161359Z.wav_chan0.xml	0
01/04/2016 16:28	AMAR382.9.20160401T162826Z.wav_chan0.xml	0
01/04/2016 16:42	AMAR382.9.20160401T164253Z.wav_chan0.xml	0
01/04/2016 16:57	AMAR382.9.20160401T165720Z.wav_chan0.xml	0
01/04/2016 17:11	AMAR382.9.20160401T171147Z.wav_chan0.xml	0
01/04/2016 17:26	AMAR382.9.20160401T172614Z.wav_chan0.xml	0
01/04/2016 17:40	AMAR382.9.20160401T174041Z.wav_chan0.xml	0
01/04/2016 17:55	AMAR382.9.20160401T175508Z.wav_chan0.xml	0
01/04/2016 18:09	AMAR382.9.20160401T180935Z.wav_chan0.xml	0
01/04/2016 18:24	AMAR382.9.20160401T182402Z.wav_chan0.xml	0
01/04/2016 18:38	AMAR382.9.20160401T183829Z.wav_chan0.xml	0
01/04/2016 18:52	AMAR382.9.20160401T185256Z.wav_chan0.xml	0
01/04/2016 19:07	AMAR382.9.20160401T190723Z.wav_chan0.xml	0
01/04/2016 19:21	AMAR382.9.20160401T192150Z.wav_chan0.xml	0
01/04/2016 19:36	AMAR382.9.20160401T193617Z.wav_chan0.xml	0
01/04/2016 19:50	AMAR382.9.20160401T195044Z.wav_chan0.xml	0
01/04/2016 20:05	AMAR382.9.20160401T200511Z.wav_chan0.xml	0
01/04/2016 20:19	AMAR382.9.20160401T201938Z.wav_chan0.xml	0
01/04/2016 20:34	AMAR382.9.20160401T203405Z.wav_chan0.xml	0
01/04/2016 20:48	AMAR382.9.20160401T204832Z.wav_chan0.xml	0
01/04/2016 21:02	AMAR382.9.20160401T210259Z.wav_chan0.xml	0
01/04/2016 21:17	AMAR382.9.20160401T211726Z.wav_chan0.xml	0
01/04/2016 21:31	AMAR382.9.20160401T213153Z.wav_chan0.xml	0
01/04/2016 21:46	AMAR382.9.20160401T214620Z.wav_chan0.xml	0
01/04/2016 22:00	AMAR382.9.20160401T220047Z.wav_chan0.xml	0
01/04/2016 22:15	AMAR382.9.20160401T221514Z.wav_chan0.xml	0
01/04/2016 22:29	AMAR382.9.20160401T222941Z.wav_chan0.xml	0
01/04/2016 22:44	AMAR382.9.20160401T224408Z.wav_chan0.xml	0
01/04/2016 22:58	AMAR382.9.20160401T225835Z.wav_chan0.xml	0
01/04/2016 23:13	AMAR382.9.20160401T231302Z.wav_chan0.xml	0
01/04/2016 23:27	AMAR382.9.20160401T232729Z.wav_chan0.xml	0
01/04/2016 23:41	AMAR382.9.20160401T234156Z.wav_chan0.xml	0
01/04/2016 23:56	AMAR382.9.20160401T235623Z.wav_chan0.xml	0
02/04/2016 0:10	AMAR382.9.20160402T001050Z.wav_chan0.xml	0
02/04/2016 0:25	AMAR382.9.20160402T002517Z.wav_chan0.xml	0
02/04/2016 0:39	AMAR382.9.20160402T003944Z.wav_chan0.xml	0
02/04/2016 0:54	AMAR382.9.20160402T005411Z.wav_chan0.xml	0
02/04/2016 1:08	AMAR382.9.20160402T010838Z.wav_chan0.xml	0
02/04/2016 1:23	AMAR382.9.20160402T012305Z.wav_chan0.xml	0
02/04/2016 1:37	AMAR382.9.20160402T013732Z.wav_chan0.xml	0
02/04/2016 1:51	AMAR382.9.20160402T015159Z.wav_chan0.xml	0
02/04/2016 2:06	AMAR382.9.20160402T020626Z.wav_chan0.xml	0
02/04/2016 2:20	AMAR382.9.20160402T022053Z.wav_chan0.xml	0
02/04/2016 2:35	AMAR382.9.20160402T023520Z.wav_chan0.xml	0
02/04/2016 2:49	AMAR382.9.20160402T024947Z.wav_chan0.xml	0
02/04/2016 3:04	AMAR382.9.20160402T030414Z.wav_chan0.xml	0
02/04/2016 3:18	AMAR382.9.20160402T031841Z.wav_chan0.xml	0
02/04/2016 3:33	AMAR382.9.20160402T033308Z.wav_chan0.xml	0
02/04/2016 3:47	AMAR382.9.20160402T034735Z.wav_chan0.xml	0
02/04/2016 4:02	AMAR382.9.20160402T040202Z.wav_chan0.xml	0
02/04/2016 4:16	AMAR382.9.20160402T041629Z.wav_chan0.xml	0
02/04/2016 4:30	AMAR382.9.20160402T043056Z.wav_chan0.xml	0
02/04/2016 4:45	AMAR382.9.20160402T044523Z.wav_chan0.xml	0
02/04/2016 4:59	AMAR382.9.20160402T045950Z.wav_chan0.xml	0
02/04/2016 5:14	AMAR382.9.20160402T051417Z.wav_chan0.xml	0
02/04/2016 5:28	AMAR382.9.20160402T052844Z.wav_chan0.xml	0
02/04/2016 5:43	AMAR382.9.20160402T054311Z.wav_chan0.xml	0
02/04/2016 5:57	AMAR382.9.20160402T055738Z.wav_chan0.xml	0
02/04/2016 6:12	AMAR382.9.20160402T061205Z.wav_chan0.xml	0
02/04/2016 6:26	AMAR382.9.20160402T062632Z.wav_chan0.xml	0
02/04/2016 6:40	AMAR382.9.20160402T064059Z.wav_chan0.xml	0
02/04/2016 6:55	AMAR382.9.20160402T065526Z.wav_chan0.xml	0
02/04/2016 7:09	AMAR382.9.20160402T070953Z.wav_chan0.xml	0
02/04/2016 7:24	AMAR382.9.20160402T072420Z.wav_chan0.xml	0
02/04/2016 7:38	AMAR382.9.20160402T073847Z.wav_chan0.xml	0
02/04/2016 7:53	AMAR382.9.20160402T075314Z.wav_chan0.xml	0
02/04/2016 8:07	AMAR382.9.20160402T080741Z.wav_chan0.xml	0
02/04/2016 8:22	AMAR382.9.20160402T082208Z.wav_chan0.xml	0
02/04/2016 8:36	AMAR382.9.20160402T083635Z.wav_chan0.xml	0
02/04/2016 8:51	AMAR382.9.20160402T085102Z.wav_chan0.xml	3
02/04/2016 9:05	AMAR382.9.20160402T090529Z.wav_chan0.xml	0
02/04/2016 9:19	AMAR382.9.20160402T091956Z.wav_chan0.xml	0
02/04/2016 9:34	AMAR382.9.20160402T093423Z.wav_chan0.xml	0
02/04/2016 9:48	AMAR382.9.20160402T094850Z.wav_chan0.xml	0
02/04/2016 10:03	AMAR382.9.20160402T100317Z.wav_chan0.xml	0
02/04/2016 10:17	AMAR382.9.20160402T101744Z.wav_chan0.xml	0
02/04/2016 10:32	AMAR382.9.20160402T103211Z.wav_chan0.xml	0
02/04/2016 10:46	AMAR382.9.20160402T104638Z.wav_chan0.xml	0
02/04/2016 11:01	AMAR382.9.20160402T110105Z.wav_chan0.xml	0
02/04/2016 11:15	AMAR382.9.20160402T111532Z.wav_chan0.xml	0
02/04/2016 11:29	AMAR382.9.20160402T112959Z.wav_chan0.xml	0
02/04/2016 11:44	AMAR382.9.20160402T114426Z.wav_chan0.xml	0
02/04/2016 11:58	AMAR382.9.20160402T115853Z.wav_chan0.xml	0
02/04/2016 12:13	AMAR382.9.20160402T121320Z.wav_chan0.xml	0
02/04/2016 12:27	AMAR382.9.20160402T122747Z.wav_chan0.xml	0
02/04/2016 12:42	AMAR382.9.20160402T124214Z.wav_chan0.xml	0
02/04/2016 12:56	AMAR382.9.20160402T125641Z.wav_chan0.xml	0
02/04/2016 13:11	AMAR382.9.20160402T131108Z.wav_chan0.xml	1
02/04/2016 13:25	AMAR382.9.20160402T132535Z.wav_chan0.xml	0
02/04/2016 13:40	AMAR382.9.20160402T134002Z.wav_chan0.xml	0
02/04/2016 13:54	AMAR382.9.20160402T135429Z.wav_chan0.xml	0
02/04/2016 14:08	AMAR382.9.20160402T140856Z.wav_chan0.xml	0
02/04/2016 14:23	AMAR382.9.20160402T142323Z.wav_chan0.xml	0
02/04/2016 14:37	AMAR382.9.20160402T143750Z.wav_chan0.xml	0
02/04/2016 14:52	AMAR382.9.20160402T145217Z.wav_chan0.xml	0
02/04/2016 15:06	AMAR382.9.20160402T150644Z.wav_chan0.xml	0
02/04/2016 15:21	AMAR382.9.20160402T152111Z.wav_chan0.xml	0
02/04/2016 15:35	AMAR382.9.20160402T153538Z.wav_chan0.xml	0
02/04/2016 15:50	AMAR382.9.20160402T155005Z.wav_chan0.xml	0
02/04/2016 16:04	AMAR382.9.20160402T160432Z.wav_chan0.xml	0
02/04/2016 16:18	AMAR382.9.20160402T161859Z.wav_chan0.xml	0
02/04/2016 16:33	AMAR382.9.20160402T163326Z.wav_chan0.xml	0
02/04/2016 16:47	AMAR382.9.20160402T164753Z.wav_chan0.xml	0
02/04/2016 17:02	AMAR382.9.20160402T170220Z.wav_chan0.xml	0
02/04/2016 17:16	AMAR382.9.20160402T171647Z.wav_chan0.xml	0
02/04/2016 17:31	AMAR382.9.20160402T173114Z.wav_chan0.xml	0
02/04/2016 17:45	AMAR382.9.20160402T174541Z.wav_chan0.xml	0
02/04/2016 18:00	AMAR382.9.20160402T180008Z.wav_chan0.xml	0
02/04/2016 18:14	AMAR382.9.20160402T181435Z.wav_chan0.xml	0
02/04/2016 18:29	AMAR382.9.20160402T182902Z.wav_chan0.xml	0
02/04/2016 18:43	AMAR382.9.20160402T184329Z.wav_chan0.xml	0
02/04/2016 18:57	AMAR382.9.20160402T185756Z.wav_chan0.xml	0
02/04/2016 19:12	AMAR382.9.20160402T191223Z.wav_chan0.xml	0
02/04/2016 19:26	AMAR382.9.20160402T192650Z.wav_chan0.xml	0
02/04/2016 19:41	AMAR382.9.20160402T194117Z.wav_chan0.xml	0
02/04/2016 19:55	AMAR382.9.20160402T195544Z.wav_chan0.xml	0
02/04/2016 20:10	AMAR382.9.20160402T201011Z.wav_chan0.xml	0
02/04/2016 20:24	AMAR382.9.20160402T202438Z.wav_chan0.xml	0
02/04/2016 20:39	AMAR382.9.20160402T203905Z.wav_chan0.xml	0
02/04/2016 20:53	AMAR382.9.20160402T205332Z.wav_chan0.xml	0
02/04/2016 21:07	AMAR382.9.20160402T210759Z.wav_chan0.xml	0
02/04/2016 21:22	AMAR382.9.20160402T212226Z.wav_chan0.xml	0
02/04/2016 21:36	AMAR382.9.20160402T213653Z.wav_chan0.xml	0
02/04/2016 21:51	AMAR382.9.20160402T215120Z.wav_chan0.xml	0
02/04/2016 22:05	AMAR382.9.20160402T220547Z.wav_chan0.xml	0
02/04/2016 22:20	AMAR382.9.20160402T222014Z.wav_chan0.xml	0
02/04/2016 22:34	AMAR382.9.20160402T223441Z.wav_chan0.xml	0
02/04/2016 22:49	AMAR382.9.20160402T224908Z.wav_chan0.xml	0
02/04/2016 23:03	AMAR382.9.20160402T230335Z.wav_chan0.xml	0
02/04/2016 23:18	AMAR382.9.20160402T231802Z.wav_chan0.xml	0
02/04/2016 23:32	AMAR382.9.20160402T233229Z.wav_chan0.xml	0
02/04/2016 23:46	AMAR382.9.20160402T234656Z.wav_chan0.xml	0
03/04/2016 0:01	AMAR382.9.20160403T000123Z.wav_chan0.xml	0
03/04/2016 0:15	AMAR382.9.20160403T001550Z.wav_chan0.xml	0
03/04/2016 0:30	AMAR382.9.20160403T003017Z.wav_chan0.xml	0
03/04/2016 0:44	AMAR382.9.20160403T004444Z.wav_chan0.xml	0
03/04/2016 0:59	AMAR382.9.20160403T005911Z.wav_chan0.xml	0
03/04/2016 1:13	AMAR382.9.20160403T011338Z.wav_chan0.xml	0
03/04/2016 1:28	AMAR382.9.20160403T012805Z.wav_chan0.xml	0
03/04/2016 1:42	AMAR382.9.20160403T014232Z.wav_chan0.xml	0
03/04/2016 1:56	AMAR382.9.20160403T015659Z.wav_chan0.xml	0
03/04/2016 2:11	AMAR382.9.20160403T021126Z.wav_chan0.xml	0
03/04/2016 2:25	AMAR382.9.20160403T022553Z.wav_chan0.xml	0
03/04/2016 2:40	AMAR382.9.20160403T024020Z.wav_chan0.xml	0
03/04/2016 2:54	AMAR382.9.20160403T025447Z.wav_chan0.xml	0
03/04/2016 3:09	AMAR382.9.20160403T030914Z.wav_chan0.xml	0
03/04/2016 3:23	AMAR382.9.20160403T032341Z.wav_chan0.xml	0
03/04/2016 3:38	AMAR382.9.20160403T033808Z.wav_chan0.xml	0
03/04/2016 3:52	AMAR382.9.20160403T035235Z.wav_chan0.xml	0
03/04/2016 4:07	AMAR382.9.20160403T040702Z.wav_chan0.xml	0
03/04/2016 4:21	AMAR382.9.20160403T042129Z.wav_chan0.xml	0
03/04/2016 4:35	AMAR382.9.20160403T043556Z.wav_chan0.xml	0
03/04/2016 4:50	AMAR382.9.20160403T045023Z.wav_chan0.xml	0
03/04/2016 5:04	AMAR382.9.20160403T050450Z.wav_chan0.xml	0
03/04/2016 5:19	AMAR382.9.20160403T051917Z.wav_chan0.xml	0
03/04/2016 5:33	AMAR382.9.20160403T053344Z.wav_chan0.xml	0
03/04/2016 5:48	AMAR382.9.20160403T054811Z.wav_chan0.xml	0
03/04/2016 6:02	AMAR382.9.20160403T060238Z.wav_chan0.xml	0
03/04/2016 6:17	AMAR382.9.20160403T061705Z.wav_chan0.xml	0
03/04/2016 6:31	AMAR382.9.20160403T063132Z.wav_chan0.xml	0
03/04/2016 6:45	AMAR382.9.20160403T064559Z.wav_chan0.xml	0
03/04/2016 7:00	AMAR382.9.20160403T070026Z.wav_chan0.xml	0
03/04/2016 7:14	AMAR382.9.20160403T071453Z.wav_chan0.xml	0
03/04/2016 7:29	AMAR382.9.20160403T072920Z.wav_chan0.xml	0
03/04/2016 7:43	AMAR382.9.20160403T074347Z.wav_chan0.xml	2
03/04/2016 7:58	AMAR382.9.20160403T075814Z.wav_chan0.xml	0
03/04/2016 8:12	AMAR382.9.20160403T081241Z.wav_chan0.xml	0
03/04/2016 8:27	AMAR382.9.20160403T082708Z.wav_chan0.xml	0
03/04/2016 8:41	AMAR382.9.20160403T084135Z.wav_chan0.xml	0
03/04/2016 8:56	AMAR382.9.20160403T085602Z.wav_chan0.xml	0
03/04/2016 9:10	AMAR382.9.20160403T091029Z.wav_chan0.xml	0
03/04/2016 9:24	AMAR382.9.20160403T092456Z.wav_chan0.xml	0
03/04/2016 9:39	AMAR382.9.20160403T093923Z.wav_chan0.xml	0
03/04/2016 9:53	AMAR382.9.20160403T095350Z.wav_chan0.xml	0
03/04/2016 10:08	AMAR382.9.20160403T100817Z.wav_chan0.xml	0
03/04/2016 10:22	AMAR382.9.20160403T102244Z.wav_chan0.xml	0
03/04/2016 10:37	AMAR382.9.20160403T103711Z.wav_chan0.xml	0
03/04/2016 10:51	AMAR382.9.20160403T105138Z.wav_chan0.xml	0
03/04/2016 11:06	AMAR382.9.20160403T110605Z.wav_chan0.xml	0
03/04/2016 11:20	AMAR382.9.20160403T112032Z.wav_chan0.xml	0
03/04/2016 11:34	AMAR382.9.20160403T113459Z.wav_chan0.xml	0
03/04/2016 11:49	AMAR382.9.20160403T114926Z.wav_chan0.xml	0
03/04/2016 12:03	AMAR382.9.20160403T120353Z.wav_chan0.xml	0
03/04/2016 12:18	AMAR382.9.20160403T121820Z.wav_chan0.xml	0
03/04/2016 12:32	AMAR382.9.20160403T123247Z.wav_chan0.xml	0
03/04/2016 12:47	AMAR382.9.20160403T124714Z.wav_chan0.xml	0
03/04/2016 13:01	AMAR382.9.20160403T130141Z.wav_chan0.xml	0
03/04/2016 13:16	AMAR382.9.20160403T131608Z.wav_chan0.xml	0
03/04/2016 13:30	AMAR382.9.20160403T133035Z.wav_chan0.xml	0
03/04/2016 13:45	AMAR382.9.20160403T134502Z.wav_chan0.xml	0
03/04/2016 13:59	AMAR382.9.20160403T135929Z.wav_chan0.xml	0
03/04/2016 14:13	AMAR382.9.20160403T141356Z.wav_chan0.xml	0
03/04/2016 14:28	AMAR382.9.20160403T142823Z.wav_chan0.xml	0
03/04/2016 14:42	AMAR382.9.20160403T144250Z.wav_chan0.xml	0
03/04/2016 14:57	AMAR382.9.20160403T145717Z.wav_chan0.xml	0
03/04/2016 15:11	AMAR382.9.20160403T151144Z.wav_chan0.xml	0
03/04/2016 15:26	AMAR382.9.20160403T152611Z.wav_chan0.xml	0
03/04/2016 15:40	AMAR382.9.20160403T154038Z.wav_chan0.xml	0
03/04/2016 15:55	AMAR382.9.20160403T155505Z.wav_chan0.xml	0
03/04/2016 16:09	AMAR382.9.20160403T160932Z.wav_chan0.xml	0
03/04/2016 16:23	AMAR382.9.20160403T162359Z.wav_chan0.xml	0
03/04/2016 16:38	AMAR382.9.20160403T163826Z.wav_chan0.xml	0
03/04/2016 16:52	AMAR382.9.20160403T165253Z.wav_chan0.xml	0
03/04/2016 17:07	AMAR382.9.20160403T170720Z.wav_chan0.xml	0
03/04/2016 17:21	AMAR382.9.20160403T172147Z.wav_chan0.xml	0
03/04/2016 17:36	AMAR382.9.20160403T173614Z.wav_chan0.xml	0
03/04/2016 17:50	AMAR382.9.20160403T175041Z.wav_chan0.xml	0
03/04/2016 18:05	AMAR382.9.20160403T180508Z.wav_chan0.xml	0
03/04/2016 18:19	AMAR382.9.20160403T181935Z.wav_chan0.xml	0
03/04/2016 18:34	AMAR382.9.20160403T183402Z.wav_chan0.xml	0
03/04/2016 18:48	AMAR382.9.20160403T184829Z.wav_chan0.xml	0
03/04/2016 19:02	AMAR382.9.20160403T190256Z.wav_chan0.xml	0
03/04/2016 19:17	AMAR382.9.20160403T191723Z.wav_chan0.xml	0
03/04/2016 19:31	AMAR382.9.20160403T193150Z.wav_chan0.xml	0
03/04/2016 19:46	AMAR382.9.20160403T194617Z.wav_chan0.xml	0
03/04/2016 20:00	AMAR382.9.20160403T200044Z.wav_chan0.xml	0
03/04/2016 20:15	AMAR382.9.20160403T201511Z.wav_chan0.xml	0
03/04/2016 20:29	AMAR382.9.20160403T202938Z.wav_chan0.xml	0
03/04/2016 20:44	AMAR382.9.20160403T204405Z.wav_chan0.xml	0
03/04/2016 20:58	AMAR382.9.20160403T205832Z.wav_chan0.xml	0
03/04/2016 21:12	AMAR382.9.20160403T211259Z.wav_chan0.xml	0
03/04/2016 21:27	AMAR382.9.20160403T212726Z.wav_chan0.xml	0
03/04/2016 21:41	AMAR382.9.20160403T214153Z.wav_chan0.xml	0
03/04/2016 21:56	AMAR382.9.20160403T215620Z.wav_chan0.xml	0
03/04/2016 22:10	AMAR382.9.20160403T221047Z.wav_chan0.xml	0
03/04/2016 22:25	AMAR382.9.20160403T222514Z.wav_chan0.xml	0
03/04/2016 22:39	AMAR382.9.20160403T223941Z.wav_chan0.xml	0
03/04/2016 22:54	AMAR382.9.20160403T225408Z.wav_chan0.xml	0
03/04/2016 23:08	AMAR382.9.20160403T230835Z.wav_chan0.xml	0
03/04/2016 23:23	AMAR382.9.20160403T232302Z.wav_chan0.xml	0
03/04/2016 23:37	AMAR382.9.20160403T233729Z.wav_chan0.xml	0
03/04/2016 23:51	AMAR382.9.20160403T235156Z.wav_chan0.xml	0
04/04/2016 0:06	AMAR382.9.20160404T000623Z.wav_chan0.xml	0
04/04/2016 0:20	AMAR382.9.20160404T002050Z.wav_chan0.xml	0
04/04/2016 0:35	AMAR382.9.20160404T003517Z.wav_chan0.xml	0
04/04/2016 0:49	AMAR382.9.20160404T004944Z.wav_chan0.xml	0
04/04/2016 1:04	AMAR382.9.20160404T010411Z.wav_chan0.xml	0
04/04/2016 1:18	AMAR382.9.20160404T011838Z.wav_chan0.xml	0
04/04/2016 1:33	AMAR382.9.20160404T013305Z.wav_chan0.xml	0
04/04/2016 1:47	AMAR382.9.20160404T014732Z.wav_chan0.xml	0
04/04/2016 2:01	AMAR382.9.20160404T020159Z.wav_chan0.xml	0
04/04/2016 2:16	AMAR382.9.20160404T021626Z.wav_chan0.xml	0
04/04/2016 2:30	AMAR382.9.20160404T023053Z.wav_chan0.xml	0
04/04/2016 2:45	AMAR382.9.20160404T024520Z.wav_chan0.xml	0
04/04/2016 2:59	AMAR382.9.20160404T025947Z.wav_chan0.xml	0
04/04/2016 3:14	AMAR382.9.20160404T031414Z.wav_chan0.xml	0
04/04/2016 3:28	AMAR382.9.20160404T032841Z.wav_chan0.xml	0
04/04/2016 3:43	AMAR382.9.20160404T034308Z.wav_chan0.xml	0
04/04/2016 3:57	AMAR382.9.20160404T035735Z.wav_chan0.xml	0
04/04/2016 4:12	AMAR382.9.20160404T041202Z.wav_chan0.xml	0
04/04/2016 4:26	AMAR382.9.20160404T042629Z.wav_chan0.xml	0
04/04/2016 4:40	AMAR382.9.20160404T044056Z.wav_chan0.xml	0
04/04/2016 4:55	AMAR382.9.20160404T045523Z.wav_chan0.xml	0
04/04/2016 5:09	AMAR382.9.20160404T050950Z.wav_chan0.xml	0
04/04/2016 5:24	AMAR382.9.20160404T052417Z.wav_chan0.xml	0
04/04/2016 5:38	AMAR382.9.20160404T053844Z.wav_chan0.xml	0
04/04/2016 5:53	AMAR382.9.20160404T055311Z.wav_chan0.xml	0
04/04/2016 6:07	AMAR382.9.20160404T060738Z.wav_chan0.xml	0
04/04/2016 6:22	AMAR382.9.20160404T062205Z.wav_chan0.xml	0
04/04/2016 6:36	AMAR382.9.20160404T063632Z.wav_chan0.xml	0
04/04/2016 6:50	AMAR382.9.20160404T065059Z.wav_chan0.xml	0
04/04/2016 7:05	AMAR382.9.20160404T070526Z.wav_chan0.xml	0
04/04/2016 7:19	AMAR382.9.20160404T071953Z.wav_chan0.xml	0
04/04/2016 7:34	AMAR382.9.20160404T073420Z.wav_chan0.xml	0
04/04/2016 7:48	AMAR382.9.20160404T074847Z.wav_chan0.xml	0
04/04/2016 8:03	AMAR382.9.20160404T080314Z.wav_chan0.xml	0
04/04/2016 8:17	AMAR382.9.20160404T081741Z.wav_chan0.xml	0
04/04/2016 8:32	AMAR382.9.20160404T083208Z.wav_chan0.xml	0
04/04/2016 8:46	AMAR382.9.20160404T084635Z.wav_chan0.xml	0
04/04/2016 9:01	AMAR382.9.20160404T090102Z.wav_chan0.xml	0
04/04/2016 9:15	AMAR382.9.20160404T091529Z.wav_chan0.xml	0
04/04/2016 9:29	AMAR382.9.20160404T092956Z.wav_chan0.xml	0
04/04/2016 9:44	AMAR382.9.20160404T094423Z.wav_chan0.xml	0
04/04/2016 9:58	AMAR382.9.20160404T095850Z.wav_chan0.xml	4
04/04/2016 10:13	AMAR382.9.20160404T101317Z.wav_chan0.xml	0
04/04/2016 10:27	AMAR382.9.20160404T102744Z.wav_chan0.xml	0
04/04/2016 10:42	AMAR382.9.20160404T104211Z.wav_chan0.xml	3
04/04/2016 10:56	AMAR382.9.20160404T105638Z.wav_chan0.xml	0
04/04/2016 11:11	AMAR382.9.20160404T111105Z.wav_chan0.xml	0
04/04/2016 11:25	AMAR382.9.20160404T112532Z.wav_chan0.xml	0
04/04/2016 11:39	AMAR382.9.20160404T113959Z.wav_chan0.xml	0
04/04/2016 11:54	AMAR382.9.20160404T115426Z.wav_chan0.xml	0
04/04/2016 12:08	AMAR382.9.20160404T120853Z.wav_chan0.xml	0
04/04/2016 12:23	AMAR382.9.20160404T122320Z.wav_chan0.xml	0
04/04/2016 12:37	AMAR382.9.20160404T123747Z.wav_chan0.xml	0
04/04/2016 12:52	AMAR382.9.20160404T125214Z.wav_chan0.xml	0
04/04/2016 13:06	AMAR382.9.20160404T130641Z.wav_chan0.xml	0
04/04/2016 13:21	AMAR382.9.20160404T132108Z.wav_chan0.xml	0
04/04/2016 13:35	AMAR382.9.20160404T133535Z.wav_chan0.xml	0
04/04/2016 13:50	AMAR382.9.20160404T135002Z.wav_chan0.xml	0
04/04/2016 14:04	AMAR382.9.20160404T140429Z.wav_chan0.xml	0
04/04/2016 14:18	AMAR382.9.20160404T141856Z.wav_chan0.xml	0
04/04/2016 14:33	AMAR382.9.20160404T143323Z.wav_chan0.xml	0
04/04/2016 14:47	AMAR382.9.20160404T144750Z.wav_chan0.xml	0
04/04/2016 15:02	AMAR382.9.20160404T150217Z.wav_chan0.xml	0
04/04/2016 15:16	AMAR382.9.20160404T151644Z.wav_chan0.xml	0
04/04/2016 15:31	AMAR382.9.20160404T153111Z.wav_chan0.xml	0
04/04/2016 15:45	AMAR382.9.20160404T154538Z.wav_chan0.xml	0
04/04/2016 16:00	AMAR382.9.20160404T160005Z.wav_chan0.xml	0
04/04/2016 16:14	AMAR382.9.20160404T161432Z.wav_chan0.xml	0
04/04/2016 16:28	AMAR382.9.20160404T162859Z.wav_chan0.xml	0
04/04/2016 16:43	AMAR382.9.20160404T164326Z.wav_chan0.xml	0
04/04/2016 16:57	AMAR382.9.20160404T165753Z.wav_chan0.xml	0
04/04/2016 17:12	AMAR382.9.20160404T171220Z.wav_chan0.xml	0
04/04/2016 17:26	AMAR382.9.20160404T172647Z.wav_chan0.xml	0
04/04/2016 17:41	AMAR382.9.20160404T174114Z.wav_chan0.xml	0
04/04/2016 17:55	AMAR382.9.20160404T175541Z.wav_chan0.xml	0
04/04/2016 18:10	AMAR382.9.20160404T181008Z.wav_chan0.xml	0
04/04/2016 18:24	AMAR382.9.20160404T182435Z.wav_chan0.xml	0
04/04/2016 18:39	AMAR382.9.20160404T183902Z.wav_chan0.xml	0
04/04/2016 18:53	AMAR382.9.20160404T185329Z.wav_chan0.xml	0
04/04/2016 19:07	AMAR382.9.20160404T190756Z.wav_chan0.xml	0
04/04/2016 19:22	AMAR382.9.20160404T192223Z.wav_chan0.xml	0
04/04/2016 19:36	AMAR382.9.20160404T193650Z.wav_chan0.xml	0
04/04/2016 19:51	AMAR382.9.20160404T195117Z.wav_chan0.xml	0
04/04/2016 20:05	AMAR382.9.20160404T200544Z.wav_chan0.xml	0
04/04/2016 20:20	AMAR382.9.20160404T202011Z.wav_chan0.xml	0
04/04/2016 20:34	AMAR382.9.20160404T203438Z.wav_chan0.xml	0
04/04/2016 20:49	AMAR382.9.20160404T204905Z.wav_chan0.xml	0
04/04/2016 21:03	AMAR382.9.20160404T210332Z.wav_chan0.xml	0
04/04/2016 21:17	AMAR382.9.20160404T211759Z.wav_chan0.xml	0
04/04/2016 21:32	AMAR382.9.20160404T213226Z.wav_chan0.xml	0
04/04/2016 21:46	AMAR382.9.20160404T214653Z.wav_chan0.xml	0
04/04/2016 22:01	AMAR382.9.20160404T220120Z.wav_chan0.xml	0
04/04/2016 22:15	AMAR382.9.20160404T221547Z.wav_chan0.xml	0
04/04/2016 22:30	AMAR382.9.20160404T223014Z.wav_chan0.xml	0
04/04/2016 22:44	AMAR382.9.20160404T224441Z.wav_chan0.xml	0
04/04/2016 22:59	AMAR382.9.20160404T225908Z.wav_chan0.xml	0
04/04/2016 23:13	AMAR382.9.20160404T231335Z.wav_chan0.xml	0
04/04/2016 23:28	AMAR382.9.20160404T232802Z.wav_chan0.xml	0
04/04/2016 23:42	AMAR382.9.20160404T234229Z.wav_chan0.xml	0
04/04/2016 23:56	AMAR382.9.20160404T235656Z.wav_chan0.xml	0
05/04/2016 0:11	AMAR382.9.20160405T001123Z.wav_chan0.xml	0
05/04/2016 0:25	AMAR382.9.20160405T002550Z.wav_chan0.xml	2
05/04/2016 0:40	AMAR382.9.20160405T004017Z.wav_chan0.xml	0
05/04/2016 0:54	AMAR382.9.20160405T005444Z.wav_chan0.xml	0
05/04/2016 1:09	AMAR382.9.20160405T010911Z.wav_chan0.xml	0
05/04/2016 1:23	AMAR382.9.20160405T012338Z.wav_chan0.xml	0
05/04/2016 1:38	AMAR382.9.20160405T013805Z.wav_chan0.xml	0
05/04/2016 1:52	AMAR382.9.20160405T015232Z.wav_chan0.xml	0
05/04/2016 2:06	AMAR382.9.20160405T020659Z.wav_chan0.xml	0
05/04/2016 2:21	AMAR382.9.20160405T022126Z.wav_chan0.xml	0
05/04/2016 2:35	AMAR382.9.20160405T023553Z.wav_chan0.xml	0
05/04/2016 2:50	AMAR382.9.20160405T025020Z.wav_chan0.xml	0
05/04/2016 3:04	AMAR382.9.20160405T030447Z.wav_chan0.xml	0
05/04/2016 3:19	AMAR382.9.20160405T031914Z.wav_chan0.xml	0
05/04/2016 3:33	AMAR382.9.20160405T033341Z.wav_chan0.xml	0
05/04/2016 3:48	AMAR382.9.20160405T034808Z.wav_chan0.xml	0
05/04/2016 4:02	AMAR382.9.20160405T040235Z.wav_chan0.xml	0
05/04/2016 4:17	AMAR382.9.20160405T041702Z.wav_chan0.xml	0
05/04/2016 4:31	AMAR382.9.20160405T043129Z.wav_chan0.xml	0
05/04/2016 4:45	AMAR382.9.20160405T044556Z.wav_chan0.xml	0
05/04/2016 5:00	AMAR382.9.20160405T050023Z.wav_chan0.xml	0
05/04/2016 5:14	AMAR382.9.20160405T051450Z.wav_chan0.xml	0
05/04/2016 5:29	AMAR382.9.20160405T052917Z.wav_chan0.xml	0
05/04/2016 5:43	AMAR382.9.20160405T054344Z.wav_chan0.xml	0
05/04/2016 5:58	AMAR382.9.20160405T055811Z.wav_chan0.xml	0
05/04/2016 6:12	AMAR382.9.20160405T061238Z.wav_chan0.xml	0
05/04/2016 6:27	AMAR382.9.20160405T062705Z.wav_chan0.xml	0
05/04/2016 6:41	AMAR382.9.20160405T064132Z.wav_chan0.xml	0
05/04/2016 6:55	AMAR382.9.20160405T065559Z.wav_chan0.xml	0
05/04/2016 7:10	AMAR382.9.20160405T071026Z.wav_chan0.xml	0
05/04/2016 7:24	AMAR382.9.20160405T072453Z.wav_chan0.xml	0
05/04/2016 7:39	AMAR382.9.20160405T073920Z.wav_chan0.xml	0
05/04/2016 7:53	AMAR382.9.20160405T075347Z.wav_chan0.xml	0
05/04/2016 8:08	AMAR382.9.20160405T080814Z.wav_chan0.xml	0
05/04/2016 8:22	AMAR382.9.20160405T082241Z.wav_chan0.xml	0
05/04/2016 8:37	AMAR382.9.20160405T083708Z.wav_chan0.xml	0
05/04/2016 8:51	AMAR382.9.20160405T085135Z.wav_chan0.xml	0
05/04/2016 9:06	AMAR382.9.20160405T090602Z.wav_chan0.xml	0
05/04/2016 9:20	AMAR382.9.20160405T092029Z.wav_chan0.xml	0
05/04/2016 9:34	AMAR382.9.20160405T093456Z.wav_chan0.xml	0
05/04/2016 9:49	AMAR382.9.20160405T094923Z.wav_chan0.xml	0
05/04/2016 10:03	AMAR382.9.20160405T100350Z.wav_chan0.xml	0
05/04/2016 10:18	AMAR382.9.20160405T101817Z.wav_chan0.xml	0
05/04/2016 10:32	AMAR382.9.20160405T103244Z.wav_chan0.xml	0
05/04/2016 10:47	AMAR382.9.20160405T104711Z.wav_chan0.xml	0
05/04/2016 11:01	AMAR382.9.20160405T110138Z.wav_chan0.xml	0
05/04/2016 11:16	AMAR382.9.20160405T111605Z.wav_chan0.xml	0
05/04/2016 11:30	AMAR382.9.20160405T113032Z.wav_chan0.xml	0
05/04/2016 11:44	AMAR382.9.20160405T114459Z.wav_chan0.xml	0
05/04/2016 11:59	AMAR382.9.20160405T115926Z.wav_chan0.xml	1
05/04/2016 12:13	AMAR382.9.20160405T121353Z.wav_chan0.xml	0
05/04/2016 12:28	AMAR382.9.20160405T122820Z.wav_chan0.xml	0
05/04/2016 12:42	AMAR382.9.20160405T124247Z.wav_chan0.xml	0
05/04/2016 12:57	AMAR382.9.20160405T125714Z.wav_chan0.xml	0
05/04/2016 13:11	AMAR382.9.20160405T131141Z.wav_chan0.xml	0
05/04/2016 13:26	AMAR382.9.20160405T132608Z.wav_chan0.xml	0
05/04/2016 13:40	AMAR382.9.20160405T134035Z.wav_chan0.xml	0
05/04/2016 13:55	AMAR382.9.20160405T135502Z.wav_chan0.xml	0
05/04/2016 14:09	AMAR382.9.20160405T140929Z.wav_chan0.xml	0
05/04/2016 14:23	AMAR382.9.20160405T142356Z.wav_chan0.xml	0
05/04/2016 14:38	AMAR382.9.20160405T143823Z.wav_chan0.xml	0
05/04/2016 14:52	AMAR382.9.20160405T145250Z.wav_chan0.xml	0
05/04/2016 15:07	AMAR382.9.20160405T150717Z.wav_chan0.xml	0
05/04/2016 15:21	AMAR382.9.20160405T152144Z.wav_chan0.xml	0
05/04/2016 15:36	AMAR382.9.20160405T153611Z.wav_chan0.xml	0
05/04/2016 15:50	AMAR382.9.20160405T155038Z.wav_chan0.xml	0
05/04/2016 16:05	AMAR382.9.20160405T160505Z.wav_chan0.xml	0
05/04/2016 16:19	AMAR382.9.20160405T161932Z.wav_chan0.xml	0
05/04/2016 16:33	AMAR382.9.20160405T163359Z.wav_chan0.xml	0
05/04/2016 16:48	AMAR382.9.20160405T164826Z.wav_chan0.xml	0
05/04/2016 17:02	AMAR382.9.20160405T170253Z.wav_chan0.xml	0
05/04/2016 17:17	AMAR382.9.20160405T171720Z.wav_chan0.xml	0
05/04/2016 17:31	AMAR382.9.20160405T173147Z.wav_chan0.xml	0
05/04/2016 17:46	AMAR382.9.20160405T174614Z.wav_chan0.xml	0
05/04/2016 18:00	AMAR382.9.20160405T180041Z.wav_chan0.xml	0
05/04/2016 18:15	AMAR382.9.20160405T181508Z.wav_chan0.xml	0
05/04/2016 18:29	AMAR382.9.20160405T182935Z.wav_chan0.xml	0
05/04/2016 18:44	AMAR382.9.20160405T184402Z.wav_chan0.xml	0
05/04/2016 18:58	AMAR382.9.20160405T185829Z.wav_chan0.xml	0
05/04/2016 19:12	AMAR382.9.20160405T191256Z.wav_chan0.xml	0
05/04/2016 19:27	AMAR382.9.20160405T192723Z.wav_chan0.xml	0
05/04/2016 19:41	AMAR382.9.20160405T194150Z.wav_chan0.xml	0
05/04/2016 19:56	AMAR382.9.20160405T195617Z.wav_chan0.xml	0
05/04/2016 20:10	AMAR382.9.20160405T201044Z.wav_chan0.xml	0
05/04/2016 20:25	AMAR382.9.20160405T202511Z.wav_chan0.xml	0
05/04/2016 20:39	AMAR382.9.20160405T203938Z.wav_chan0.xml	0
05/04/2016 20:54	AMAR382.9.20160405T205405Z.wav_chan0.xml	0
05/04/2016 21:08	AMAR382.9.20160405T210832Z.wav_chan0.xml	0
05/04/2016 21:22	AMAR382.9.20160405T212259Z.wav_chan0.xml	0
05/04/2016 21:37	AMAR382.9.20160405T213726Z.wav_chan0.xml	0
05/04/2016 21:51	AMAR382.9.20160405T215153Z.wav_chan0.xml	0
05/04/2016 22:06	AMAR382.9.20160405T220620Z.wav_chan0.xml	0
05/04/2016 22:20	AMAR382.9.20160405T222047Z.wav_chan0.xml	0
05/04/2016 22:35	AMAR382.9.20160405T223514Z.wav_chan0.xml	0
05/04/2016 22:49	AMAR382.9.20160405T224941Z.wav_chan0.xml	0
05/04/2016 23:04	AMAR382.9.20160405T230408Z.wav_chan0.xml	0
05/04/2016 23:18	AMAR382.9.20160405T231835Z.wav_chan0.xml	0
05/04/2016 23:33	AMAR382.9.20160405T233302Z.wav_chan0.xml	0
05/04/2016 23:47	AMAR382.9.20160405T234729Z.wav_chan0.xml	0
06/04/2016 0:01	AMAR382.9.20160406T000156Z.wav_chan0.xml	0
06/04/2016 0:16	AMAR382.9.20160406T001623Z.wav_chan0.xml	0
06/04/2016 0:30	AMAR382.9.20160406T003050Z.wav_chan0.xml	0
06/04/2016 0:45	AMAR382.9.20160406T004517Z.wav_chan0.xml	0
06/04/2016 0:59	AMAR382.9.20160406T005944Z.wav_chan0.xml	0
06/04/2016 1:14	AMAR382.9.20160406T011411Z.wav_chan0.xml	0
06/04/2016 1:28	AMAR382.9.20160406T012838Z.wav_chan0.xml	0
06/04/2016 1:43	AMAR382.9.20160406T014305Z.wav_chan0.xml	0
06/04/2016 1:57	AMAR382.9.20160406T015732Z.wav_chan0.xml	0
06/04/2016 2:11	AMAR382.9.20160406T021159Z.wav_chan0.xml	0
06/04/2016 2:26	AMAR382.9.20160406T022626Z.wav_chan0.xml	0
06/04/2016 2:40	AMAR382.9.20160406T024053Z.wav_chan0.xml	0
06/04/2016 2:55	AMAR382.9.20160406T025520Z.wav_chan0.xml	0
06/04/2016 3:09	AMAR382.9.20160406T030947Z.wav_chan0.xml	0
06/04/2016 3:24	AMAR382.9.20160406T032414Z.wav_chan0.xml	0
06/04/2016 3:38	AMAR382.9.20160406T033841Z.wav_chan0.xml	0
06/04/2016 3:53	AMAR382.9.20160406T035308Z.wav_chan0.xml	0
06/04/2016 4:07	AMAR382.9.20160406T040735Z.wav_chan0.xml	0
06/04/2016 4:22	AMAR382.9.20160406T042202Z.wav_chan0.xml	0
06/04/2016 4:36	AMAR382.9.20160406T043629Z.wav_chan0.xml	0
06/04/2016 4:50	AMAR382.9.20160406T045056Z.wav_chan0.xml	0
06/04/2016 5:05	AMAR382.9.20160406T050523Z.wav_chan0.xml	0
06/04/2016 5:19	AMAR382.9.20160406T051950Z.wav_chan0.xml	0
06/04/2016 5:34	AMAR382.9.20160406T053417Z.wav_chan0.xml	0
06/04/2016 5:48	AMAR382.9.20160406T054844Z.wav_chan0.xml	0
06/04/2016 6:03	AMAR382.9.20160406T060311Z.wav_chan0.xml	0
06/04/2016 6:17	AMAR382.9.20160406T061738Z.wav_chan0.xml	0
06/04/2016 6:32	AMAR382.9.20160406T063205Z.wav_chan0.xml	0
06/04/2016 6:46	AMAR382.9.20160406T064632Z.wav_chan0.xml	0
06/04/2016 7:00	AMAR382.9.20160406T070059Z.wav_chan0.xml	0
06/04/2016 7:15	AMAR382.9.20160406T071526Z.wav_chan0.xml	0
06/04/2016 7:29	AMAR382.9.20160406T072953Z.wav_chan0.xml	0
06/04/2016 7:44	AMAR382.9.20160406T074420Z.wav_chan0.xml	0
06/04/2016 7:58	AMAR382.9.20160406T075847Z.wav_chan0.xml	0
06/04/2016 8:13	AMAR382.9.20160406T081314Z.wav_chan0.xml	0
06/04/2016 8:27	AMAR382.9.20160406T082741Z.wav_chan0.xml	0
06/04/2016 8:42	AMAR382.9.20160406T084208Z.wav_chan0.xml	0
06/04/2016 8:56	AMAR382.9.20160406T085635Z.wav_chan0.xml	0
06/04/2016 9:11	AMAR382.9.20160406T091102Z.wav_chan0.xml	0
06/04/2016 9:25	AMAR382.9.20160406T092529Z.wav_chan0.xml	0
06/04/2016 9:39	AMAR382.9.20160406T093956Z.wav_chan0.xml	0
06/04/2016 9:54	AMAR382.9.20160406T095423Z.wav_chan0.xml	0
06/04/2016 10:08	AMAR382.9.20160406T100850Z.wav_chan0.xml	0
06/04/2016 10:23	AMAR382.9.20160406T102317Z.wav_chan0.xml	0
06/04/2016 10:37	AMAR382.9.20160406T103744Z.wav_chan0.xml	0
06/04/2016 10:52	AMAR382.9.20160406T105211Z.wav_chan0.xml	0
06/04/2016 11:06	AMAR382.9.20160406T110638Z.wav_chan0.xml	0
06/04/2016 11:21	AMAR382.9.20160406T112105Z.wav_chan0.xml	0
06/04/2016 11:35	AMAR382.9.20160406T113532Z.wav_chan0.xml	0
06/04/2016 11:49	AMAR382.9.20160406T114959Z.wav_chan0.xml	0
06/04/2016 12:04	AMAR382.9.20160406T120426Z.wav_chan0.xml	0
06/04/2016 12:18	AMAR382.9.20160406T121853Z.wav_chan0.xml	0
06/04/2016 12:33	AMAR382.9.20160406T123320Z.wav_chan0.xml	0
06/04/2016 12:47	AMAR382.9.20160406T124747Z.wav_chan0.xml	0
06/04/2016 13:02	AMAR382.9.20160406T130214Z.wav_chan0.xml	0
06/04/2016 13:16	AMAR382.9.20160406T131641Z.wav_chan0.xml	0
06/04/2016 13:31	AMAR382.9.20160406T133108Z.wav_chan0.xml	0
06/04/2016 13:45	AMAR382.9.20160406T134535Z.wav_chan0.xml	0
06/04/2016 14:00	AMAR382.9.20160406T140002Z.wav_chan0.xml	0
06/04/2016 14:14	AMAR382.9.20160406T141429Z.wav_chan0.xml	0
06/04/2016 14:28	AMAR382.9.20160406T142856Z.wav_chan0.xml	0
06/04/2016 14:43	AMAR382.9.20160406T144323Z.wav_chan0.xml	0
06/04/2016 14:57	AMAR382.9.20160406T145750Z.wav_chan0.xml	0
06/04/2016 15:12	AMAR382.9.20160406T151217Z.wav_chan0.xml	0
06/04/2016 15:26	AMAR382.9.20160406T152644Z.wav_chan0.xml	0
06/04/2016 15:41	AMAR382.9.20160406T154111Z.wav_chan0.xml	0
06/04/2016 15:55	AMAR382.9.20160406T155538Z.wav_chan0.xml	0
06/04/2016 16:10	AMAR382.9.20160406T161005Z.wav_chan0.xml	0
06/04/2016 16:24	AMAR382.9.20160406T162432Z.wav_chan0.xml	0
06/04/2016 16:38	AMAR382.9.20160406T163859Z.wav_chan0.xml	0
06/04/2016 16:53	AMAR382.9.20160406T165326Z.wav_chan0.xml	0
06/04/2016 17:07	AMAR382.9.20160406T170753Z.wav_chan0.xml	0
06/04/2016 17:22	AMAR382.9.20160406T172220Z.wav_chan0.xml	0
06/04/2016 17:36	AMAR382.9.20160406T173647Z.wav_chan0.xml	0
06/04/2016 17:51	AMAR382.9.20160406T175114Z.wav_chan0.xml	0
06/04/2016 18:05	AMAR382.9.20160406T180541Z.wav_chan0.xml	0
06/04/2016 18:20	AMAR382.9.20160406T182008Z.wav_chan0.xml	0
06/04/2016 18:34	AMAR382.9.20160406T183435Z.wav_chan0.xml	0
06/04/2016 18:49	AMAR382.9.20160406T184902Z.wav_chan0.xml	0
06/04/2016 19:03	AMAR382.9.20160406T190329Z.wav_chan0.xml	0
06/04/2016 19:17	AMAR382.9.20160406T191756Z.wav_chan0.xml	0
06/04/2016 19:32	AMAR382.9.20160406T193223Z.wav_chan0.xml	0
06/04/2016 19:46	AMAR382.9.20160406T194650Z.wav_chan0.xml	0
06/04/2016 20:01	AMAR382.9.20160406T200117Z.wav_chan0.xml	0
06/04/2016 20:15	AMAR382.9.20160406T201544Z.wav_chan0.xml	0
06/04/2016 20:30	AMAR382.9.20160406T203011Z.wav_chan0.xml	0
06/04/2016 20:44	AMAR382.9.20160406T204438Z.wav_chan0.xml	0
06/04/2016 20:59	AMAR382.9.20160406T205905Z.wav_chan0.xml	0
06/04/2016 21:13	AMAR382.9.20160406T211332Z.wav_chan0.xml	0
06/04/2016 21:27	AMAR382.9.20160406T212759Z.wav_chan0.xml	0
06/04/2016 21:42	AMAR382.9.20160406T214226Z.wav_chan0.xml	0
06/04/2016 21:56	AMAR382.9.20160406T215653Z.wav_chan0.xml	0
06/04/2016 22:11	AMAR382.9.20160406T221120Z.wav_chan0.xml	0
06/04/2016 22:25	AMAR382.9.20160406T222547Z.wav_chan0.xml	0
06/04/2016 22:40	AMAR382.9.20160406T224014Z.wav_chan0.xml	0
06/04/2016 22:54	AMAR382.9.20160406T225441Z.wav_chan0.xml	0
06/04/2016 23:09	AMAR382.9.20160406T230908Z.wav_chan0.xml	0
06/04/2016 23:23	AMAR382.9.20160406T232335Z.wav_chan0.xml	0
06/04/2016 23:38	AMAR382.9.20160406T233802Z.wav_chan0.xml	0
06/04/2016 23:52	AMAR382.9.20160406T235229Z.wav_chan0.xml	0
07/04/2016 0:06	AMAR382.9.20160407T000656Z.wav_chan0.xml	0
07/04/2016 0:21	AMAR382.9.20160407T002123Z.wav_chan0.xml	0
07/04/2016 0:35	AMAR382.9.20160407T003550Z.wav_chan0.xml	0
07/04/2016 0:50	AMAR382.9.20160407T005017Z.wav_chan0.xml	0
07/04/2016 1:04	AMAR382.9.20160407T010444Z.wav_chan0.xml	0
07/04/2016 1:19	AMAR382.9.20160407T011911Z.wav_chan0.xml	0
07/04/2016 1:33	AMAR382.9.20160407T013338Z.wav_chan0.xml	0
07/04/2016 1:48	AMAR382.9.20160407T014805Z.wav_chan0.xml	0
07/04/2016 2:02	AMAR382.9.20160407T020232Z.wav_chan0.xml	0
07/04/2016 2:16	AMAR382.9.20160407T021659Z.wav_chan0.xml	0
07/04/2016 2:31	AMAR382.9.20160407T023126Z.wav_chan0.xml	0
07/04/2016 2:45	AMAR382.9.20160407T024553Z.wav_chan0.xml	0
07/04/2016 3:00	AMAR382.9.20160407T030020Z.wav_chan0.xml	0
07/04/2016 3:14	AMAR382.9.20160407T031447Z.wav_chan0.xml	0
07/04/2016 3:29	AMAR382.9.20160407T032914Z.wav_chan0.xml	0
07/04/2016 3:43	AMAR382.9.20160407T034341Z.wav_chan0.xml	0
07/04/2016 3:58	AMAR382.9.20160407T035808Z.wav_chan0.xml	0
07/04/2016 4:12	AMAR382.9.20160407T041235Z.wav_chan0.xml	0
07/04/2016 4:27	AMAR382.9.20160407T042702Z.wav_chan0.xml	0
07/04/2016 4:41	AMAR382.9.20160407T044129Z.wav_chan0.xml	0
07/04/2016 4:55	AMAR382.9.20160407T045556Z.wav_chan0.xml	0
07/04/2016 5:10	AMAR382.9.20160407T051023Z.wav_chan0.xml	0
07/04/2016 5:24	AMAR382.9.20160407T052450Z.wav_chan0.xml	0
07/04/2016 5:39	AMAR382.9.20160407T053917Z.wav_chan0.xml	0
07/04/2016 5:53	AMAR382.9.20160407T055344Z.wav_chan0.xml	0
07/04/2016 6:08	AMAR382.9.20160407T060811Z.wav_chan0.xml	0
07/04/2016 6:22	AMAR382.9.20160407T062238Z.wav_chan0.xml	0
07/04/2016 6:37	AMAR382.9.20160407T063705Z.wav_chan0.xml	0
07/04/2016 6:51	AMAR382.9.20160407T065132Z.wav_chan0.xml	0
07/04/2016 7:05	AMAR382.9.20160407T070559Z.wav_chan0.xml	0
07/04/2016 7:20	AMAR382.9.20160407T072026Z.wav_chan0.xml	0
07/04/2016 7:34	AMAR382.9.20160407T073453Z.wav_chan0.xml	0
07/04/2016 7:49	AMAR382.9.20160407T074920Z.wav_chan0.xml	0
07/04/2016 8:03	AMAR382.9.20160407T080347Z.wav_chan0.xml	0
07/04/2016 8:18	AMAR382.9.20160407T081814Z.wav_chan0.xml	0
07/04/2016 8:32	AMAR382.9.20160407T083241Z.wav_chan0.xml	0
07/04/2016 8:47	AMAR382.9.20160407T084708Z.wav_chan0.xml	0
07/04/2016 9:01	AMAR382.9.20160407T090135Z.wav_chan0.xml	0
07/04/2016 9:16	AMAR382.9.20160407T091602Z.wav_chan0.xml	0
07/04/2016 9:30	AMAR382.9.20160407T093029Z.wav_chan0.xml	0
07/04/2016 9:44	AMAR382.9.20160407T094456Z.wav_chan0.xml	0
07/04/2016 9:59	AMAR382.9.20160407T095923Z.wav_chan0.xml	0
07/04/2016 10:13	AMAR382.9.20160407T101350Z.wav_chan0.xml	0
07/04/2016 10:28	AMAR382.9.20160407T102817Z.wav_chan0.xml	0
07/04/2016 10:42	AMAR382.9.20160407T104244Z.wav_chan0.xml	0
07/04/2016 10:57	AMAR382.9.20160407T105711Z.wav_chan0.xml	0
07/04/2016 11:11	AMAR382.9.20160407T111138Z.wav_chan0.xml	0
07/04/2016 11:26	AMAR382.9.20160407T112605Z.wav_chan0.xml	0
07/04/2016 11:40	AMAR382.9.20160407T114032Z.wav_chan0.xml	0
07/04/2016 11:54	AMAR382.9.20160407T115459Z.wav_chan0.xml	0
07/04/2016 12:09	AMAR382.9.20160407T120926Z.wav_chan0.xml	0
07/04/2016 12:23	AMAR382.9.20160407T122353Z.wav_chan0.xml	0
07/04/2016 12:38	AMAR382.9.20160407T123820Z.wav_chan0.xml	0
07/04/2016 12:52	AMAR382.9.20160407T125247Z.wav_chan0.xml	0
07/04/2016 13:07	AMAR382.9.20160407T130714Z.wav_chan0.xml	0
07/04/2016 13:21	AMAR382.9.20160407T132141Z.wav_chan0.xml	0
07/04/2016 13:36	AMAR382.9.20160407T133608Z.wav_chan0.xml	0
07/04/2016 13:50	AMAR382.9.20160407T135035Z.wav_chan0.xml	0
07/04/2016 14:05	AMAR382.9.20160407T140502Z.wav_chan0.xml	0
07/04/2016 14:19	AMAR382.9.20160407T141929Z.wav_chan0.xml	0
07/04/2016 14:33	AMAR382.9.20160407T143356Z.wav_chan0.xml	0
07/04/2016 14:48	AMAR382.9.20160407T144823Z.wav_chan0.xml	0
07/04/2016 15:02	AMAR382.9.20160407T150250Z.wav_chan0.xml	0
07/04/2016 15:17	AMAR382.9.20160407T151717Z.wav_chan0.xml	0
07/04/2016 15:31	AMAR382.9.20160407T153144Z.wav_chan0.xml	0
07/04/2016 15:46	AMAR382.9.20160407T154611Z.wav_chan0.xml	0
07/04/2016 16:00	AMAR382.9.20160407T160038Z.wav_chan0.xml	0
07/04/2016 16:15	AMAR382.9.20160407T161505Z.wav_chan0.xml	0
07/04/2016 16:29	AMAR382.9.20160407T162932Z.wav_chan0.xml	0
07/04/2016 16:43	AMAR382.9.20160407T164359Z.wav_chan0.xml	0
07/04/2016 16:58	AMAR382.9.20160407T165826Z.wav_chan0.xml	0
07/04/2016 17:12	AMAR382.9.20160407T171253Z.wav_chan0.xml	0
07/04/2016 17:27	AMAR382.9.20160407T172720Z.wav_chan0.xml	0
07/04/2016 17:41	AMAR382.9.20160407T174147Z.wav_chan0.xml	0
07/04/2016 17:56	AMAR382.9.20160407T175614Z.wav_chan0.xml	0
07/04/2016 18:10	AMAR382.9.20160407T181041Z.wav_chan0.xml	0
07/04/2016 18:25	AMAR382.9.20160407T182508Z.wav_chan0.xml	0
07/04/2016 18:39	AMAR382.9.20160407T183935Z.wav_chan0.xml	0
07/04/2016 18:54	AMAR382.9.20160407T185402Z.wav_chan0.xml	0
07/04/2016 19:08	AMAR382.9.20160407T190829Z.wav_chan0.xml	0
07/04/2016 19:22	AMAR382.9.20160407T192256Z.wav_chan0.xml	0
07/04/2016 19:37	AMAR382.9.20160407T193723Z.wav_chan0.xml	0
07/04/2016 19:51	AMAR382.9.20160407T195150Z.wav_chan0.xml	0
07/04/2016 20:06	AMAR382.9.20160407T200617Z.wav_chan0.xml	0
07/04/2016 20:20	AMAR382.9.20160407T202044Z.wav_chan0.xml	0
07/04/2016 20:35	AMAR382.9.20160407T203511Z.wav_chan0.xml	0
07/04/2016 20:49	AMAR382.9.20160407T204938Z.wav_chan0.xml	0
07/04/2016 21:04	AMAR382.9.20160407T210405Z.wav_chan0.xml	0
07/04/2016 21:18	AMAR382.9.20160407T211832Z.wav_chan0.xml	0
07/04/2016 21:32	AMAR382.9.20160407T213259Z.wav_chan0.xml	0
07/04/2016 21:47	AMAR382.9.20160407T214726Z.wav_chan0.xml	0
07/04/2016 22:01	AMAR382.9.20160407T220153Z.wav_chan0.xml	0
07/04/2016 22:16	AMAR382.9.20160407T221620Z.wav_chan0.xml	0
07/04/2016 22:30	AMAR382.9.20160407T223047Z.wav_chan0.xml	0
07/04/2016 22:45	AMAR382.9.20160407T224514Z.wav_chan0.xml	0
07/04/2016 22:59	AMAR382.9.20160407T225941Z.wav_chan0.xml	0
07/04/2016 23:14	AMAR382.9.20160407T231408Z.wav_chan0.xml	0
07/04/2016 23:28	AMAR382.9.20160407T232835Z.wav_chan0.xml	0
07/04/2016 23:43	AMAR382.9.20160407T234302Z.wav_chan0.xml	0
07/04/2016 23:57	AMAR382.9.20160407T235729Z.wav_chan0.xml	0
08/04/2016 0:11	AMAR382.9.20160408T001156Z.wav_chan0.xml	0
08/04/2016 0:26	AMAR382.9.20160408T002623Z.wav_chan0.xml	0
08/04/2016 0:40	AMAR382.9.20160408T004050Z.wav_chan0.xml	0
08/04/2016 0:55	AMAR382.9.20160408T005517Z.wav_chan0.xml	0
08/04/2016 1:09	AMAR382.9.20160408T010944Z.wav_chan0.xml	0
08/04/2016 1:24	AMAR382.9.20160408T012411Z.wav_chan0.xml	0
08/04/2016 1:38	AMAR382.9.20160408T013838Z.wav_chan0.xml	0
08/04/2016 1:53	AMAR382.9.20160408T015305Z.wav_chan0.xml	0
08/04/2016 2:07	AMAR382.9.20160408T020732Z.wav_chan0.xml	0
08/04/2016 2:21	AMAR382.9.20160408T022159Z.wav_chan0.xml	0
08/04/2016 2:36	AMAR382.9.20160408T023626Z.wav_chan0.xml	0
08/04/2016 2:50	AMAR382.9.20160408T025053Z.wav_chan0.xml	0
08/04/2016 3:05	AMAR382.9.20160408T030520Z.wav_chan0.xml	0
08/04/2016 3:19	AMAR382.9.20160408T031947Z.wav_chan0.xml	0
08/04/2016 3:34	AMAR382.9.20160408T033414Z.wav_chan0.xml	0
08/04/2016 3:48	AMAR382.9.20160408T034841Z.wav_chan0.xml	0
08/04/2016 4:03	AMAR382.9.20160408T040308Z.wav_chan0.xml	0
08/04/2016 4:17	AMAR382.9.20160408T041735Z.wav_chan0.xml	0
08/04/2016 4:32	AMAR382.9.20160408T043202Z.wav_chan0.xml	0
08/04/2016 4:46	AMAR382.9.20160408T044629Z.wav_chan0.xml	0
08/04/2016 5:00	AMAR382.9.20160408T050056Z.wav_chan0.xml	0
08/04/2016 5:15	AMAR382.9.20160408T051523Z.wav_chan0.xml	0
08/04/2016 5:29	AMAR382.9.20160408T052950Z.wav_chan0.xml	0
08/04/2016 5:44	AMAR382.9.20160408T054417Z.wav_chan0.xml	0
08/04/2016 5:58	AMAR382.9.20160408T055844Z.wav_chan0.xml	0
08/04/2016 6:13	AMAR382.9.20160408T061311Z.wav_chan0.xml	0
08/04/2016 6:27	AMAR382.9.20160408T062738Z.wav_chan0.xml	0
08/04/2016 6:42	AMAR382.9.20160408T064205Z.wav_chan0.xml	0
08/04/2016 6:56	AMAR382.9.20160408T065632Z.wav_chan0.xml	0
08/04/2016 7:10	AMAR382.9.20160408T071059Z.wav_chan0.xml	0
08/04/2016 7:25	AMAR382.9.20160408T072526Z.wav_chan0.xml	0
08/04/2016 7:39	AMAR382.9.20160408T073953Z.wav_chan0.xml	0
08/04/2016 7:54	AMAR382.9.20160408T075420Z.wav_chan0.xml	0
08/04/2016 8:08	AMAR382.9.20160408T080847Z.wav_chan0.xml	0
08/04/2016 8:23	AMAR382.9.20160408T082314Z.wav_chan0.xml	0
08/04/2016 8:37	AMAR382.9.20160408T083741Z.wav_chan0.xml	0
08/04/2016 8:52	AMAR382.9.20160408T085208Z.wav_chan0.xml	0
08/04/2016 9:06	AMAR382.9.20160408T090635Z.wav_chan0.xml	0
08/04/2016 9:21	AMAR382.9.20160408T092102Z.wav_chan0.xml	0
08/04/2016 9:35	AMAR382.9.20160408T093529Z.wav_chan0.xml	0
08/04/2016 9:49	AMAR382.9.20160408T094956Z.wav_chan0.xml	0
08/04/2016 10:04	AMAR382.9.20160408T100423Z.wav_chan0.xml	0
08/04/2016 10:18	AMAR382.9.20160408T101850Z.wav_chan0.xml	0
08/04/2016 10:33	AMAR382.9.20160408T103317Z.wav_chan0.xml	0
08/04/2016 10:47	AMAR382.9.20160408T104744Z.wav_chan0.xml	0
08/04/2016 11:02	AMAR382.9.20160408T110211Z.wav_chan0.xml	0
08/04/2016 11:16	AMAR382.9.20160408T111638Z.wav_chan0.xml	0
08/04/2016 11:31	AMAR382.9.20160408T113105Z.wav_chan0.xml	0
08/04/2016 11:45	AMAR382.9.20160408T114532Z.wav_chan0.xml	0
[truncated: 12,265 more rows]
