# Supplementary material for: Signals from the deep: Spatial and temporal acoustic occurrence of beaked whales off western Ireland
Source: PLoS One. 2018 Jun 21;13(6):e0199431. doi: 10.1371/journal.pone.0199431 (PMC6013249; doi:10.1371/journal.pone.0199431)
Supplement: S31 Dataset — (CSV) [file pone.0199431.s031.csv]

Time	File	Cuviers	northern bottlenose
10/07/2016 16:26	AMAR379.9.20160710T162632Z.wav_chan0.xml	0	0
10/07/2016 16:40	AMAR379.9.20160710T164059Z.wav_chan0.xml	0	0
10/07/2016 16:55	AMAR379.9.20160710T165526Z.wav_chan0.xml	0	0
10/07/2016 17:09	AMAR379.9.20160710T170953Z.wav_chan0.xml	0	0
10/07/2016 17:24	AMAR379.9.20160710T172420Z.wav_chan0.xml	0	0
10/07/2016 17:38	AMAR379.9.20160710T173847Z.wav_chan0.xml	0	0
10/07/2016 17:53	AMAR379.9.20160710T175314Z.wav_chan0.xml	0	0
10/07/2016 18:07	AMAR379.9.20160710T180741Z.wav_chan0.xml	0	0
10/07/2016 18:22	AMAR379.9.20160710T182208Z.wav_chan0.xml	0	0
10/07/2016 18:36	AMAR379.9.20160710T183635Z.wav_chan0.xml	0	0
10/07/2016 18:51	AMAR379.9.20160710T185102Z.wav_chan0.xml	0	0
10/07/2016 19:05	AMAR379.9.20160710T190529Z.wav_chan0.xml	0	0
10/07/2016 19:19	AMAR379.9.20160710T191956Z.wav_chan0.xml	0	0
10/07/2016 19:34	AMAR379.9.20160710T193423Z.wav_chan0.xml	0	0
10/07/2016 19:48	AMAR379.9.20160710T194850Z.wav_chan0.xml	0	0
10/07/2016 20:03	AMAR379.9.20160710T200317Z.wav_chan0.xml	0	0
10/07/2016 20:17	AMAR379.9.20160710T201744Z.wav_chan0.xml	2	0
10/07/2016 20:32	AMAR379.9.20160710T203211Z.wav_chan0.xml	0	0
10/07/2016 20:46	AMAR379.9.20160710T204638Z.wav_chan0.xml	0	0
10/07/2016 21:01	AMAR379.9.20160710T210105Z.wav_chan0.xml	0	0
10/07/2016 21:15	AMAR379.9.20160710T211532Z.wav_chan0.xml	0	0
10/07/2016 21:29	AMAR379.9.20160710T212959Z.wav_chan0.xml	0	0
10/07/2016 21:44	AMAR379.9.20160710T214426Z.wav_chan0.xml	0	0
10/07/2016 21:58	AMAR379.9.20160710T215853Z.wav_chan0.xml	0	0
10/07/2016 22:13	AMAR379.9.20160710T221320Z.wav_chan0.xml	0	0
10/07/2016 22:27	AMAR379.9.20160710T222747Z.wav_chan0.xml	0	0
10/07/2016 22:42	AMAR379.9.20160710T224214Z.wav_chan0.xml	2	0
10/07/2016 22:56	AMAR379.9.20160710T225641Z.wav_chan0.xml	0	0
10/07/2016 23:11	AMAR379.9.20160710T231108Z.wav_chan0.xml	5	0
10/07/2016 23:25	AMAR379.9.20160710T232535Z.wav_chan0.xml	8	0
10/07/2016 23:40	AMAR379.9.20160710T234002Z.wav_chan0.xml	0	0
10/07/2016 23:54	AMAR379.9.20160710T235429Z.wav_chan0.xml	0	0
11/07/2016 0:08	AMAR379.9.20160711T000856Z.wav_chan0.xml	0	0
11/07/2016 0:23	AMAR379.9.20160711T002323Z.wav_chan0.xml	0	0
11/07/2016 0:37	AMAR379.9.20160711T003750Z.wav_chan0.xml	0	0
11/07/2016 0:52	AMAR379.9.20160711T005217Z.wav_chan0.xml	0	0
11/07/2016 1:06	AMAR379.9.20160711T010644Z.wav_chan0.xml	0	0
11/07/2016 1:21	AMAR379.9.20160711T012111Z.wav_chan0.xml	0	0
11/07/2016 1:35	AMAR379.9.20160711T013538Z.wav_chan0.xml	0	0
11/07/2016 1:50	AMAR379.9.20160711T015005Z.wav_chan0.xml	0	0
11/07/2016 2:04	AMAR379.9.20160711T020432Z.wav_chan0.xml	0	0
11/07/2016 2:18	AMAR379.9.20160711T021859Z.wav_chan0.xml	0	0
11/07/2016 2:33	AMAR379.9.20160711T023326Z.wav_chan0.xml	0	0
11/07/2016 2:47	AMAR379.9.20160711T024753Z.wav_chan0.xml	0	0
11/07/2016 3:02	AMAR379.9.20160711T030220Z.wav_chan0.xml	0	0
11/07/2016 3:16	AMAR379.9.20160711T031647Z.wav_chan0.xml	0	0
11/07/2016 3:31	AMAR379.9.20160711T033114Z.wav_chan0.xml	0	0
11/07/2016 3:45	AMAR379.9.20160711T034541Z.wav_chan0.xml	0	0
11/07/2016 4:00	AMAR379.9.20160711T040008Z.wav_chan0.xml	0	0
11/07/2016 4:14	AMAR379.9.20160711T041435Z.wav_chan0.xml	0	0
11/07/2016 4:29	AMAR379.9.20160711T042902Z.wav_chan0.xml	0	0
11/07/2016 4:43	AMAR379.9.20160711T044329Z.wav_chan0.xml	0	0
11/07/2016 4:57	AMAR379.9.20160711T045756Z.wav_chan0.xml	0	0
11/07/2016 5:12	AMAR379.9.20160711T051223Z.wav_chan0.xml	0	0
11/07/2016 5:26	AMAR379.9.20160711T052650Z.wav_chan0.xml	0	0
11/07/2016 5:41	AMAR379.9.20160711T054117Z.wav_chan0.xml	0	0
11/07/2016 5:55	AMAR379.9.20160711T055544Z.wav_chan0.xml	0	0
11/07/2016 6:10	AMAR379.9.20160711T061011Z.wav_chan0.xml	0	0
11/07/2016 6:24	AMAR379.9.20160711T062438Z.wav_chan0.xml	0	0
11/07/2016 6:39	AMAR379.9.20160711T063905Z.wav_chan0.xml	0	0
11/07/2016 6:53	AMAR379.9.20160711T065332Z.wav_chan0.xml	0	0
11/07/2016 7:07	AMAR379.9.20160711T070759Z.wav_chan0.xml	0	0
11/07/2016 7:22	AMAR379.9.20160711T072226Z.wav_chan0.xml	0	0
11/07/2016 7:36	AMAR379.9.20160711T073653Z.wav_chan0.xml	0	0
11/07/2016 7:51	AMAR379.9.20160711T075120Z.wav_chan0.xml	0	0
11/07/2016 8:05	AMAR379.9.20160711T080547Z.wav_chan0.xml	0	0
11/07/2016 8:20	AMAR379.9.20160711T082014Z.wav_chan0.xml	0	0
11/07/2016 8:34	AMAR379.9.20160711T083441Z.wav_chan0.xml	1	0
11/07/2016 8:49	AMAR379.9.20160711T084908Z.wav_chan0.xml	0	0
11/07/2016 9:03	AMAR379.9.20160711T090335Z.wav_chan0.xml	5	0
11/07/2016 9:18	AMAR379.9.20160711T091802Z.wav_chan0.xml	0	0
11/07/2016 9:32	AMAR379.9.20160711T093229Z.wav_chan0.xml	0	0
11/07/2016 9:46	AMAR379.9.20160711T094656Z.wav_chan0.xml	0	0
11/07/2016 10:01	AMAR379.9.20160711T100123Z.wav_chan0.xml	3	0
11/07/2016 10:15	AMAR379.9.20160711T101550Z.wav_chan0.xml	0	0
11/07/2016 10:30	AMAR379.9.20160711T103017Z.wav_chan0.xml	0	0
11/07/2016 10:44	AMAR379.9.20160711T104444Z.wav_chan0.xml	0	0
11/07/2016 10:59	AMAR379.9.20160711T105911Z.wav_chan0.xml	0	0
11/07/2016 11:13	AMAR379.9.20160711T111338Z.wav_chan0.xml	0	0
11/07/2016 11:28	AMAR379.9.20160711T112805Z.wav_chan0.xml	0	0
11/07/2016 11:42	AMAR379.9.20160711T114232Z.wav_chan0.xml	0	0
11/07/2016 11:56	AMAR379.9.20160711T115659Z.wav_chan0.xml	0	0
11/07/2016 12:11	AMAR379.9.20160711T121126Z.wav_chan0.xml	0	0
11/07/2016 12:25	AMAR379.9.20160711T122553Z.wav_chan0.xml	0	0
11/07/2016 12:40	AMAR379.9.20160711T124020Z.wav_chan0.xml	0	0
11/07/2016 12:54	AMAR379.9.20160711T125447Z.wav_chan0.xml	0	0
11/07/2016 13:09	AMAR379.9.20160711T130914Z.wav_chan0.xml	0	0
11/07/2016 13:23	AMAR379.9.20160711T132341Z.wav_chan0.xml	0	0
11/07/2016 13:38	AMAR379.9.20160711T133808Z.wav_chan0.xml	0	0
11/07/2016 13:52	AMAR379.9.20160711T135235Z.wav_chan0.xml	0	0
11/07/2016 14:07	AMAR379.9.20160711T140702Z.wav_chan0.xml	0	0
11/07/2016 14:21	AMAR379.9.20160711T142129Z.wav_chan0.xml	0	0
11/07/2016 14:35	AMAR379.9.20160711T143556Z.wav_chan0.xml	0	0
11/07/2016 14:50	AMAR379.9.20160711T145023Z.wav_chan0.xml	0	0
11/07/2016 15:04	AMAR379.9.20160711T150450Z.wav_chan0.xml	0	0
11/07/2016 15:19	AMAR379.9.20160711T151917Z.wav_chan0.xml	0	0
11/07/2016 15:33	AMAR379.9.20160711T153344Z.wav_chan0.xml	0	0
11/07/2016 15:48	AMAR379.9.20160711T154811Z.wav_chan0.xml	0	0
11/07/2016 16:02	AMAR379.9.20160711T160238Z.wav_chan0.xml	0	0
11/07/2016 16:17	AMAR379.9.20160711T161705Z.wav_chan0.xml	0	0
11/07/2016 16:31	AMAR379.9.20160711T163132Z.wav_chan0.xml	0	0
11/07/2016 16:45	AMAR379.9.20160711T164559Z.wav_chan0.xml	0	0
11/07/2016 17:00	AMAR379.9.20160711T170026Z.wav_chan0.xml	0	0
11/07/2016 17:14	AMAR379.9.20160711T171453Z.wav_chan0.xml	0	0
11/07/2016 17:29	AMAR379.9.20160711T172920Z.wav_chan0.xml	0	0
11/07/2016 17:43	AMAR379.9.20160711T174347Z.wav_chan0.xml	0	0
11/07/2016 17:58	AMAR379.9.20160711T175814Z.wav_chan0.xml	0	0
11/07/2016 18:12	AMAR379.9.20160711T181241Z.wav_chan0.xml	0	0
11/07/2016 18:27	AMAR379.9.20160711T182708Z.wav_chan0.xml	0	0
11/07/2016 18:41	AMAR379.9.20160711T184135Z.wav_chan0.xml	0	0
11/07/2016 18:56	AMAR379.9.20160711T185602Z.wav_chan0.xml	0	0
11/07/2016 19:10	AMAR379.9.20160711T191029Z.wav_chan0.xml	0	0
11/07/2016 19:24	AMAR379.9.20160711T192456Z.wav_chan0.xml	0	0
11/07/2016 19:39	AMAR379.9.20160711T193923Z.wav_chan0.xml	0	0
11/07/2016 19:53	AMAR379.9.20160711T195350Z.wav_chan0.xml	0	0
11/07/2016 20:08	AMAR379.9.20160711T200817Z.wav_chan0.xml	0	0
11/07/2016 20:22	AMAR379.9.20160711T202244Z.wav_chan0.xml	0	0
11/07/2016 20:37	AMAR379.9.20160711T203711Z.wav_chan0.xml	0	0
11/07/2016 20:51	AMAR379.9.20160711T205138Z.wav_chan0.xml	0	0
11/07/2016 21:06	AMAR379.9.20160711T210605Z.wav_chan0.xml	0	0
11/07/2016 21:20	AMAR379.9.20160711T212032Z.wav_chan0.xml	0	0
11/07/2016 21:34	AMAR379.9.20160711T213459Z.wav_chan0.xml	0	0
11/07/2016 21:49	AMAR379.9.20160711T214926Z.wav_chan0.xml	0	0
11/07/2016 22:03	AMAR379.9.20160711T220353Z.wav_chan0.xml	0	0
11/07/2016 22:18	AMAR379.9.20160711T221820Z.wav_chan0.xml	0	0
11/07/2016 22:32	AMAR379.9.20160711T223247Z.wav_chan0.xml	0	0
11/07/2016 22:47	AMAR379.9.20160711T224714Z.wav_chan0.xml	0	0
11/07/2016 23:01	AMAR379.9.20160711T230141Z.wav_chan0.xml	0	0
11/07/2016 23:16	AMAR379.9.20160711T231608Z.wav_chan0.xml	0	0
11/07/2016 23:30	AMAR379.9.20160711T233035Z.wav_chan0.xml	0	0
11/07/2016 23:45	AMAR379.9.20160711T234502Z.wav_chan0.xml	0	0
11/07/2016 23:59	AMAR379.9.20160711T235929Z.wav_chan0.xml	0	0
12/07/2016 0:13	AMAR379.9.20160712T001356Z.wav_chan0.xml	0	0
12/07/2016 0:28	AMAR379.9.20160712T002823Z.wav_chan0.xml	0	0
12/07/2016 0:42	AMAR379.9.20160712T004250Z.wav_chan0.xml	0	0
12/07/2016 0:57	AMAR379.9.20160712T005717Z.wav_chan0.xml	0	0
12/07/2016 1:11	AMAR379.9.20160712T011144Z.wav_chan0.xml	0	0
12/07/2016 1:26	AMAR379.9.20160712T012611Z.wav_chan0.xml	0	0
12/07/2016 1:40	AMAR379.9.20160712T014038Z.wav_chan0.xml	0	0
12/07/2016 1:55	AMAR379.9.20160712T015505Z.wav_chan0.xml	0	0
12/07/2016 2:09	AMAR379.9.20160712T020932Z.wav_chan0.xml	0	0
12/07/2016 2:23	AMAR379.9.20160712T022359Z.wav_chan0.xml	0	0
12/07/2016 2:38	AMAR379.9.20160712T023826Z.wav_chan0.xml	0	0
12/07/2016 2:52	AMAR379.9.20160712T025253Z.wav_chan0.xml	0	0
12/07/2016 3:07	AMAR379.9.20160712T030720Z.wav_chan0.xml	0	0
12/07/2016 3:21	AMAR379.9.20160712T032147Z.wav_chan0.xml	0	0
12/07/2016 3:36	AMAR379.9.20160712T033614Z.wav_chan0.xml	11	0
12/07/2016 3:50	AMAR379.9.20160712T035041Z.wav_chan0.xml	0	0
12/07/2016 4:05	AMAR379.9.20160712T040508Z.wav_chan0.xml	0	0
12/07/2016 4:19	AMAR379.9.20160712T041935Z.wav_chan0.xml	0	0
12/07/2016 4:34	AMAR379.9.20160712T043402Z.wav_chan0.xml	0	0
12/07/2016 4:48	AMAR379.9.20160712T044829Z.wav_chan0.xml	0	0
12/07/2016 5:02	AMAR379.9.20160712T050256Z.wav_chan0.xml	0	0
12/07/2016 5:17	AMAR379.9.20160712T051723Z.wav_chan0.xml	0	0
12/07/2016 5:31	AMAR379.9.20160712T053150Z.wav_chan0.xml	0	0
12/07/2016 5:46	AMAR379.9.20160712T054617Z.wav_chan0.xml	0	0
12/07/2016 6:00	AMAR379.9.20160712T060044Z.wav_chan0.xml	0	0
12/07/2016 6:15	AMAR379.9.20160712T061511Z.wav_chan0.xml	0	0
12/07/2016 6:29	AMAR379.9.20160712T062938Z.wav_chan0.xml	0	0
12/07/2016 6:44	AMAR379.9.20160712T064405Z.wav_chan0.xml	0	0
12/07/2016 6:58	AMAR379.9.20160712T065832Z.wav_chan0.xml	0	0
12/07/2016 7:12	AMAR379.9.20160712T071259Z.wav_chan0.xml	0	0
12/07/2016 7:27	AMAR379.9.20160712T072726Z.wav_chan0.xml	0	0
12/07/2016 7:41	AMAR379.9.20160712T074153Z.wav_chan0.xml	0	0
12/07/2016 7:56	AMAR379.9.20160712T075620Z.wav_chan0.xml	0	0
12/07/2016 8:10	AMAR379.9.20160712T081047Z.wav_chan0.xml	0	0
12/07/2016 8:25	AMAR379.9.20160712T082514Z.wav_chan0.xml	0	0
12/07/2016 8:39	AMAR379.9.20160712T083941Z.wav_chan0.xml	0	0
12/07/2016 8:54	AMAR379.9.20160712T085408Z.wav_chan0.xml	0	0
12/07/2016 9:08	AMAR379.9.20160712T090835Z.wav_chan0.xml	0	0
12/07/2016 9:23	AMAR379.9.20160712T092302Z.wav_chan0.xml	0	0
12/07/2016 9:37	AMAR379.9.20160712T093729Z.wav_chan0.xml	0	0
12/07/2016 9:51	AMAR379.9.20160712T095156Z.wav_chan0.xml	0	0
12/07/2016 10:06	AMAR379.9.20160712T100623Z.wav_chan0.xml	0	0
12/07/2016 10:20	AMAR379.9.20160712T102050Z.wav_chan0.xml	0	0
12/07/2016 10:35	AMAR379.9.20160712T103517Z.wav_chan0.xml	0	0
12/07/2016 10:49	AMAR379.9.20160712T104944Z.wav_chan0.xml	0	0
12/07/2016 11:04	AMAR379.9.20160712T110411Z.wav_chan0.xml	0	0
12/07/2016 11:18	AMAR379.9.20160712T111838Z.wav_chan0.xml	0	0
12/07/2016 11:33	AMAR379.9.20160712T113305Z.wav_chan0.xml	0	0
12/07/2016 11:47	AMAR379.9.20160712T114732Z.wav_chan0.xml	0	0
12/07/2016 12:01	AMAR379.9.20160712T120159Z.wav_chan0.xml	0	0
12/07/2016 12:16	AMAR379.9.20160712T121626Z.wav_chan0.xml	0	0
12/07/2016 12:30	AMAR379.9.20160712T123053Z.wav_chan0.xml	0	0
12/07/2016 12:45	AMAR379.9.20160712T124520Z.wav_chan0.xml	0	0
12/07/2016 12:59	AMAR379.9.20160712T125947Z.wav_chan0.xml	0	0
12/07/2016 13:14	AMAR379.9.20160712T131414Z.wav_chan0.xml	0	0
12/07/2016 13:28	AMAR379.9.20160712T132841Z.wav_chan0.xml	0	0
12/07/2016 13:43	AMAR379.9.20160712T134308Z.wav_chan0.xml	0	0
12/07/2016 13:57	AMAR379.9.20160712T135735Z.wav_chan0.xml	0	0
12/07/2016 14:12	AMAR379.9.20160712T141202Z.wav_chan0.xml	0	0
12/07/2016 14:26	AMAR379.9.20160712T142629Z.wav_chan0.xml	0	0
12/07/2016 14:40	AMAR379.9.20160712T144056Z.wav_chan0.xml	0	0
12/07/2016 14:55	AMAR379.9.20160712T145523Z.wav_chan0.xml	0	0
12/07/2016 15:09	AMAR379.9.20160712T150950Z.wav_chan0.xml	2	0
12/07/2016 15:24	AMAR379.9.20160712T152417Z.wav_chan0.xml	1	0
12/07/2016 15:38	AMAR379.9.20160712T153844Z.wav_chan0.xml	0	0
12/07/2016 15:53	AMAR379.9.20160712T155311Z.wav_chan0.xml	0	0
12/07/2016 16:07	AMAR379.9.20160712T160738Z.wav_chan0.xml	0	0
12/07/2016 16:22	AMAR379.9.20160712T162205Z.wav_chan0.xml	0	0
12/07/2016 16:36	AMAR379.9.20160712T163632Z.wav_chan0.xml	0	0
12/07/2016 16:50	AMAR379.9.20160712T165059Z.wav_chan0.xml	0	0
12/07/2016 17:05	AMAR379.9.20160712T170526Z.wav_chan0.xml	0	0
12/07/2016 17:19	AMAR379.9.20160712T171953Z.wav_chan0.xml	0	0
12/07/2016 17:34	AMAR379.9.20160712T173420Z.wav_chan0.xml	0	0
12/07/2016 17:48	AMAR379.9.20160712T174847Z.wav_chan0.xml	0	0
12/07/2016 18:03	AMAR379.9.20160712T180314Z.wav_chan0.xml	0	0
12/07/2016 18:17	AMAR379.9.20160712T181741Z.wav_chan0.xml	0	0
12/07/2016 18:32	AMAR379.9.20160712T183208Z.wav_chan0.xml	0	0
12/07/2016 18:46	AMAR379.9.20160712T184635Z.wav_chan0.xml	0	0
12/07/2016 19:01	AMAR379.9.20160712T190102Z.wav_chan0.xml	0	0
12/07/2016 19:15	AMAR379.9.20160712T191529Z.wav_chan0.xml	0	0
12/07/2016 19:29	AMAR379.9.20160712T192956Z.wav_chan0.xml	0	0
12/07/2016 19:44	AMAR379.9.20160712T194423Z.wav_chan0.xml	0	0
12/07/2016 19:58	AMAR379.9.20160712T195850Z.wav_chan0.xml	0	0
12/07/2016 20:13	AMAR379.9.20160712T201317Z.wav_chan0.xml	0	0
12/07/2016 20:27	AMAR379.9.20160712T202744Z.wav_chan0.xml	0	0
12/07/2016 20:42	AMAR379.9.20160712T204211Z.wav_chan0.xml	0	0
12/07/2016 20:56	AMAR379.9.20160712T205638Z.wav_chan0.xml	0	0
12/07/2016 21:11	AMAR379.9.20160712T211105Z.wav_chan0.xml	0	0
12/07/2016 21:25	AMAR379.9.20160712T212532Z.wav_chan0.xml	0	0
12/07/2016 21:39	AMAR379.9.20160712T213959Z.wav_chan0.xml	0	0
12/07/2016 21:54	AMAR379.9.20160712T215426Z.wav_chan0.xml	0	0
12/07/2016 22:08	AMAR379.9.20160712T220853Z.wav_chan0.xml	0	0
12/07/2016 22:23	AMAR379.9.20160712T222320Z.wav_chan0.xml	0	0
12/07/2016 22:37	AMAR379.9.20160712T223747Z.wav_chan0.xml	0	0
12/07/2016 22:52	AMAR379.9.20160712T225214Z.wav_chan0.xml	0	0
12/07/2016 23:06	AMAR379.9.20160712T230641Z.wav_chan0.xml	0	0
12/07/2016 23:21	AMAR379.9.20160712T232108Z.wav_chan0.xml	0	0
12/07/2016 23:35	AMAR379.9.20160712T233535Z.wav_chan0.xml	0	0
12/07/2016 23:50	AMAR379.9.20160712T235002Z.wav_chan0.xml	0	0
13/07/2016 0:04	AMAR379.9.20160713T000429Z.wav_chan0.xml	0	0
13/07/2016 0:18	AMAR379.9.20160713T001856Z.wav_chan0.xml	0	0
13/07/2016 0:33	AMAR379.9.20160713T003323Z.wav_chan0.xml	0	0
13/07/2016 0:47	AMAR379.9.20160713T004750Z.wav_chan0.xml	0	0
13/07/2016 1:02	AMAR379.9.20160713T010217Z.wav_chan0.xml	0	0
13/07/2016 1:16	AMAR379.9.20160713T011644Z.wav_chan0.xml	0	0
13/07/2016 1:31	AMAR379.9.20160713T013111Z.wav_chan0.xml	0	0
13/07/2016 1:45	AMAR379.9.20160713T014538Z.wav_chan0.xml	0	0
13/07/2016 2:00	AMAR379.9.20160713T020005Z.wav_chan0.xml	0	0
13/07/2016 2:14	AMAR379.9.20160713T021432Z.wav_chan0.xml	0	0
13/07/2016 2:28	AMAR379.9.20160713T022859Z.wav_chan0.xml	0	0
13/07/2016 2:43	AMAR379.9.20160713T024326Z.wav_chan0.xml	0	0
13/07/2016 2:57	AMAR379.9.20160713T025753Z.wav_chan0.xml	0	0
13/07/2016 3:12	AMAR379.9.20160713T031220Z.wav_chan0.xml	0	0
13/07/2016 3:26	AMAR379.9.20160713T032647Z.wav_chan0.xml	0	0
13/07/2016 3:41	AMAR379.9.20160713T034114Z.wav_chan0.xml	0	0
13/07/2016 3:55	AMAR379.9.20160713T035541Z.wav_chan0.xml	0	0
13/07/2016 4:10	AMAR379.9.20160713T041008Z.wav_chan0.xml	0	0
13/07/2016 4:24	AMAR379.9.20160713T042435Z.wav_chan0.xml	0	0
13/07/2016 4:39	AMAR379.9.20160713T043902Z.wav_chan0.xml	0	0
13/07/2016 4:53	AMAR379.9.20160713T045329Z.wav_chan0.xml	0	0
13/07/2016 5:07	AMAR379.9.20160713T050756Z.wav_chan0.xml	0	0
13/07/2016 5:22	AMAR379.9.20160713T052223Z.wav_chan0.xml	0	0
13/07/2016 5:36	AMAR379.9.20160713T053650Z.wav_chan0.xml	0	0
13/07/2016 5:51	AMAR379.9.20160713T055117Z.wav_chan0.xml	0	0
13/07/2016 6:05	AMAR379.9.20160713T060544Z.wav_chan0.xml	0	0
13/07/2016 6:20	AMAR379.9.20160713T062011Z.wav_chan0.xml	0	0
13/07/2016 6:34	AMAR379.9.20160713T063438Z.wav_chan0.xml	0	0
13/07/2016 6:49	AMAR379.9.20160713T064905Z.wav_chan0.xml	0	0
13/07/2016 7:03	AMAR379.9.20160713T070332Z.wav_chan0.xml	0	0
13/07/2016 7:17	AMAR379.9.20160713T071759Z.wav_chan0.xml	0	0
13/07/2016 7:32	AMAR379.9.20160713T073226Z.wav_chan0.xml	2	0
13/07/2016 7:46	AMAR379.9.20160713T074653Z.wav_chan0.xml	0	0
13/07/2016 8:01	AMAR379.9.20160713T080120Z.wav_chan0.xml	0	0
13/07/2016 8:15	AMAR379.9.20160713T081547Z.wav_chan0.xml	0	0
13/07/2016 8:30	AMAR379.9.20160713T083014Z.wav_chan0.xml	0	0
13/07/2016 8:44	AMAR379.9.20160713T084441Z.wav_chan0.xml	0	0
13/07/2016 8:59	AMAR379.9.20160713T085908Z.wav_chan0.xml	0	0
13/07/2016 9:13	AMAR379.9.20160713T091335Z.wav_chan0.xml	0	0
13/07/2016 9:28	AMAR379.9.20160713T092802Z.wav_chan0.xml	0	0
13/07/2016 9:42	AMAR379.9.20160713T094229Z.wav_chan0.xml	0	0
13/07/2016 9:56	AMAR379.9.20160713T095656Z.wav_chan0.xml	0	0
13/07/2016 10:11	AMAR379.9.20160713T101123Z.wav_chan0.xml	0	0
13/07/2016 10:25	AMAR379.9.20160713T102550Z.wav_chan0.xml	0	0
13/07/2016 10:40	AMAR379.9.20160713T104017Z.wav_chan0.xml	0	0
13/07/2016 10:54	AMAR379.9.20160713T105444Z.wav_chan0.xml	0	0
13/07/2016 11:09	AMAR379.9.20160713T110911Z.wav_chan0.xml	0	0
13/07/2016 11:23	AMAR379.9.20160713T112338Z.wav_chan0.xml	0	0
13/07/2016 11:38	AMAR379.9.20160713T113805Z.wav_chan0.xml	0	0
13/07/2016 11:52	AMAR379.9.20160713T115232Z.wav_chan0.xml	0	0
13/07/2016 12:06	AMAR379.9.20160713T120659Z.wav_chan0.xml	0	0
13/07/2016 12:21	AMAR379.9.20160713T122126Z.wav_chan0.xml	0	0
13/07/2016 12:35	AMAR379.9.20160713T123553Z.wav_chan0.xml	0	0
13/07/2016 12:50	AMAR379.9.20160713T125020Z.wav_chan0.xml	0	0
13/07/2016 13:04	AMAR379.9.20160713T130447Z.wav_chan0.xml	2	0
13/07/2016 13:19	AMAR379.9.20160713T131914Z.wav_chan0.xml	0	0
13/07/2016 13:33	AMAR379.9.20160713T133341Z.wav_chan0.xml	0	0
13/07/2016 13:48	AMAR379.9.20160713T134808Z.wav_chan0.xml	4	0
13/07/2016 14:02	AMAR379.9.20160713T140235Z.wav_chan0.xml	0	0
13/07/2016 14:17	AMAR379.9.20160713T141702Z.wav_chan0.xml	0	0
13/07/2016 14:31	AMAR379.9.20160713T143129Z.wav_chan0.xml	0	0
13/07/2016 14:45	AMAR379.9.20160713T144556Z.wav_chan0.xml	0	0
13/07/2016 15:00	AMAR379.9.20160713T150023Z.wav_chan0.xml	0	0
13/07/2016 15:14	AMAR379.9.20160713T151450Z.wav_chan0.xml	0	0
13/07/2016 15:29	AMAR379.9.20160713T152917Z.wav_chan0.xml	0	0
13/07/2016 15:43	AMAR379.9.20160713T154344Z.wav_chan0.xml	0	0
13/07/2016 15:58	AMAR379.9.20160713T155811Z.wav_chan0.xml	0	0
13/07/2016 16:12	AMAR379.9.20160713T161238Z.wav_chan0.xml	0	0
13/07/2016 16:27	AMAR379.9.20160713T162705Z.wav_chan0.xml	0	0
13/07/2016 16:41	AMAR379.9.20160713T164132Z.wav_chan0.xml	0	0
13/07/2016 16:55	AMAR379.9.20160713T165559Z.wav_chan0.xml	0	0
13/07/2016 17:10	AMAR379.9.20160713T171026Z.wav_chan0.xml	0	0
13/07/2016 17:24	AMAR379.9.20160713T172453Z.wav_chan0.xml	0	0
13/07/2016 17:39	AMAR379.9.20160713T173920Z.wav_chan0.xml	0	0
13/07/2016 17:53	AMAR379.9.20160713T175347Z.wav_chan0.xml	0	0
13/07/2016 18:08	AMAR379.9.20160713T180814Z.wav_chan0.xml	1	0
13/07/2016 18:22	AMAR379.9.20160713T182241Z.wav_chan0.xml	0	0
13/07/2016 18:37	AMAR379.9.20160713T183708Z.wav_chan0.xml	0	0
13/07/2016 18:51	AMAR379.9.20160713T185135Z.wav_chan0.xml	0	0
13/07/2016 19:06	AMAR379.9.20160713T190602Z.wav_chan0.xml	0	0
13/07/2016 19:20	AMAR379.9.20160713T192029Z.wav_chan0.xml	0	0
13/07/2016 19:34	AMAR379.9.20160713T193456Z.wav_chan0.xml	0	0
13/07/2016 19:49	AMAR379.9.20160713T194923Z.wav_chan0.xml	4	0
13/07/2016 20:03	AMAR379.9.20160713T200350Z.wav_chan0.xml	0	0
13/07/2016 20:18	AMAR379.9.20160713T201817Z.wav_chan0.xml	0	0
13/07/2016 20:32	AMAR379.9.20160713T203244Z.wav_chan0.xml	0	0
13/07/2016 20:47	AMAR379.9.20160713T204711Z.wav_chan0.xml	2	0
13/07/2016 21:01	AMAR379.9.20160713T210138Z.wav_chan0.xml	0	0
13/07/2016 21:16	AMAR379.9.20160713T211605Z.wav_chan0.xml	0	0
13/07/2016 21:30	AMAR379.9.20160713T213032Z.wav_chan0.xml	0	0
13/07/2016 21:44	AMAR379.9.20160713T214459Z.wav_chan0.xml	0	0
13/07/2016 21:59	AMAR379.9.20160713T215926Z.wav_chan0.xml	0	0
13/07/2016 22:13	AMAR379.9.20160713T221353Z.wav_chan0.xml	0	0
13/07/2016 22:28	AMAR379.9.20160713T222820Z.wav_chan0.xml	0	0
13/07/2016 22:42	AMAR379.9.20160713T224247Z.wav_chan0.xml	0	0
13/07/2016 22:57	AMAR379.9.20160713T225714Z.wav_chan0.xml	0	0
13/07/2016 23:11	AMAR379.9.20160713T231141Z.wav_chan0.xml	0	0
13/07/2016 23:26	AMAR379.9.20160713T232608Z.wav_chan0.xml	0	0
13/07/2016 23:40	AMAR379.9.20160713T234035Z.wav_chan0.xml	0	0
13/07/2016 23:55	AMAR379.9.20160713T235502Z.wav_chan0.xml	0	0
14/07/2016 0:09	AMAR379.9.20160714T000929Z.wav_chan0.xml	0	0
14/07/2016 0:23	AMAR379.9.20160714T002356Z.wav_chan0.xml	0	0
14/07/2016 0:38	AMAR379.9.20160714T003823Z.wav_chan0.xml	0	0
14/07/2016 0:52	AMAR379.9.20160714T005250Z.wav_chan0.xml	0	0
14/07/2016 1:07	AMAR379.9.20160714T010717Z.wav_chan0.xml	0	0
14/07/2016 1:21	AMAR379.9.20160714T012144Z.wav_chan0.xml	0	0
14/07/2016 1:36	AMAR379.9.20160714T013611Z.wav_chan0.xml	0	0
14/07/2016 1:50	AMAR379.9.20160714T015038Z.wav_chan0.xml	0	0
14/07/2016 2:05	AMAR379.9.20160714T020505Z.wav_chan0.xml	0	0
14/07/2016 2:19	AMAR379.9.20160714T021932Z.wav_chan0.xml	0	0
14/07/2016 2:33	AMAR379.9.20160714T023359Z.wav_chan0.xml	0	0
14/07/2016 2:48	AMAR379.9.20160714T024826Z.wav_chan0.xml	0	0
14/07/2016 3:02	AMAR379.9.20160714T030253Z.wav_chan0.xml	0	0
14/07/2016 3:17	AMAR379.9.20160714T031720Z.wav_chan0.xml	0	0
14/07/2016 3:31	AMAR379.9.20160714T033147Z.wav_chan0.xml	0	0
14/07/2016 3:46	AMAR379.9.20160714T034614Z.wav_chan0.xml	0	0
14/07/2016 4:00	AMAR379.9.20160714T040041Z.wav_chan0.xml	0	0
14/07/2016 4:15	AMAR379.9.20160714T041508Z.wav_chan0.xml	0	0
14/07/2016 4:29	AMAR379.9.20160714T042935Z.wav_chan0.xml	0	0
14/07/2016 4:44	AMAR379.9.20160714T044402Z.wav_chan0.xml	0	0
14/07/2016 4:58	AMAR379.9.20160714T045829Z.wav_chan0.xml	0	0
14/07/2016 5:12	AMAR379.9.20160714T051256Z.wav_chan0.xml	2	0
14/07/2016 5:27	AMAR379.9.20160714T052723Z.wav_chan0.xml	2	0
14/07/2016 5:41	AMAR379.9.20160714T054150Z.wav_chan0.xml	0	0
14/07/2016 5:56	AMAR379.9.20160714T055617Z.wav_chan0.xml	0	0
14/07/2016 6:10	AMAR379.9.20160714T061044Z.wav_chan0.xml	0	0
14/07/2016 6:25	AMAR379.9.20160714T062511Z.wav_chan0.xml	0	0
14/07/2016 6:39	AMAR379.9.20160714T063938Z.wav_chan0.xml	0	0
14/07/2016 6:54	AMAR379.9.20160714T065405Z.wav_chan0.xml	0	0
14/07/2016 7:08	AMAR379.9.20160714T070832Z.wav_chan0.xml	0	0
14/07/2016 7:22	AMAR379.9.20160714T072259Z.wav_chan0.xml	0	0
14/07/2016 7:37	AMAR379.9.20160714T073726Z.wav_chan0.xml	0	0
14/07/2016 7:51	AMAR379.9.20160714T075153Z.wav_chan0.xml	0	0
14/07/2016 8:06	AMAR379.9.20160714T080620Z.wav_chan0.xml	0	0
14/07/2016 8:20	AMAR379.9.20160714T082047Z.wav_chan0.xml	0	0
14/07/2016 8:35	AMAR379.9.20160714T083514Z.wav_chan0.xml	0	0
14/07/2016 8:49	AMAR379.9.20160714T084941Z.wav_chan0.xml	0	0
14/07/2016 9:04	AMAR379.9.20160714T090408Z.wav_chan0.xml	1	0
14/07/2016 9:18	AMAR379.9.20160714T091835Z.wav_chan0.xml	0	0
14/07/2016 9:33	AMAR379.9.20160714T093302Z.wav_chan0.xml	0	0
14/07/2016 9:47	AMAR379.9.20160714T094729Z.wav_chan0.xml	0	0
14/07/2016 10:01	AMAR379.9.20160714T100156Z.wav_chan0.xml	0	0
14/07/2016 10:16	AMAR379.9.20160714T101623Z.wav_chan0.xml	0	0
14/07/2016 10:30	AMAR379.9.20160714T103050Z.wav_chan0.xml	0	0
14/07/2016 10:45	AMAR379.9.20160714T104517Z.wav_chan0.xml	0	0
14/07/2016 10:59	AMAR379.9.20160714T105944Z.wav_chan0.xml	0	0
14/07/2016 11:14	AMAR379.9.20160714T111411Z.wav_chan0.xml	0	0
14/07/2016 11:28	AMAR379.9.20160714T112838Z.wav_chan0.xml	0	0
14/07/2016 11:43	AMAR379.9.20160714T114305Z.wav_chan0.xml	0	0
14/07/2016 11:57	AMAR379.9.20160714T115732Z.wav_chan0.xml	0	0
14/07/2016 12:11	AMAR379.9.20160714T121159Z.wav_chan0.xml	0	0
14/07/2016 12:26	AMAR379.9.20160714T122626Z.wav_chan0.xml	0	0
14/07/2016 12:40	AMAR379.9.20160714T124053Z.wav_chan0.xml	0	0
14/07/2016 12:55	AMAR379.9.20160714T125520Z.wav_chan0.xml	0	0
14/07/2016 13:09	AMAR379.9.20160714T130947Z.wav_chan0.xml	0	0
14/07/2016 13:24	AMAR379.9.20160714T132414Z.wav_chan0.xml	0	0
14/07/2016 13:38	AMAR379.9.20160714T133841Z.wav_chan0.xml	0	0
14/07/2016 13:53	AMAR379.9.20160714T135308Z.wav_chan0.xml	0	0
14/07/2016 14:07	AMAR379.9.20160714T140735Z.wav_chan0.xml	0	0
14/07/2016 14:22	AMAR379.9.20160714T142202Z.wav_chan0.xml	0	0
14/07/2016 14:36	AMAR379.9.20160714T143629Z.wav_chan0.xml	0	0
14/07/2016 14:50	AMAR379.9.20160714T145056Z.wav_chan0.xml	0	0
14/07/2016 15:05	AMAR379.9.20160714T150523Z.wav_chan0.xml	0	0
14/07/2016 15:19	AMAR379.9.20160714T151950Z.wav_chan0.xml	0	0
14/07/2016 15:34	AMAR379.9.20160714T153417Z.wav_chan0.xml	0	0
14/07/2016 15:48	AMAR379.9.20160714T154844Z.wav_chan0.xml	0	0
14/07/2016 16:03	AMAR379.9.20160714T160311Z.wav_chan0.xml	0	0
14/07/2016 16:17	AMAR379.9.20160714T161738Z.wav_chan0.xml	0	0
14/07/2016 16:32	AMAR379.9.20160714T163205Z.wav_chan0.xml	0	0
14/07/2016 16:46	AMAR379.9.20160714T164632Z.wav_chan0.xml	0	0
14/07/2016 17:00	AMAR379.9.20160714T170059Z.wav_chan0.xml	0	0
14/07/2016 17:15	AMAR379.9.20160714T171526Z.wav_chan0.xml	0	0
14/07/2016 17:29	AMAR379.9.20160714T172953Z.wav_chan0.xml	0	0
14/07/2016 17:44	AMAR379.9.20160714T174420Z.wav_chan0.xml	0	0
14/07/2016 17:58	AMAR379.9.20160714T175847Z.wav_chan0.xml	0	0
14/07/2016 18:13	AMAR379.9.20160714T181314Z.wav_chan0.xml	0	0
14/07/2016 18:27	AMAR379.9.20160714T182741Z.wav_chan0.xml	0	0
14/07/2016 18:42	AMAR379.9.20160714T184208Z.wav_chan0.xml	0	0
14/07/2016 18:56	AMAR379.9.20160714T185635Z.wav_chan0.xml	0	0
14/07/2016 19:11	AMAR379.9.20160714T191102Z.wav_chan0.xml	0	0
14/07/2016 19:25	AMAR379.9.20160714T192529Z.wav_chan0.xml	0	0
14/07/2016 19:39	AMAR379.9.20160714T193956Z.wav_chan0.xml	0	0
14/07/2016 19:54	AMAR379.9.20160714T195423Z.wav_chan0.xml	0	0
14/07/2016 20:08	AMAR379.9.20160714T200850Z.wav_chan0.xml	0	0
14/07/2016 20:23	AMAR379.9.20160714T202317Z.wav_chan0.xml	0	0
14/07/2016 20:37	AMAR379.9.20160714T203744Z.wav_chan0.xml	0	0
14/07/2016 20:52	AMAR379.9.20160714T205211Z.wav_chan0.xml	0	0
14/07/2016 21:06	AMAR379.9.20160714T210638Z.wav_chan0.xml	0	0
14/07/2016 21:21	AMAR379.9.20160714T212105Z.wav_chan0.xml	0	0
14/07/2016 21:35	AMAR379.9.20160714T213532Z.wav_chan0.xml	0	0
14/07/2016 21:49	AMAR379.9.20160714T214959Z.wav_chan0.xml	0	0
14/07/2016 22:04	AMAR379.9.20160714T220426Z.wav_chan0.xml	0	0
14/07/2016 22:18	AMAR379.9.20160714T221853Z.wav_chan0.xml	0	0
14/07/2016 22:33	AMAR379.9.20160714T223320Z.wav_chan0.xml	0	0
14/07/2016 22:47	AMAR379.9.20160714T224747Z.wav_chan0.xml	0	0
14/07/2016 23:02	AMAR379.9.20160714T230214Z.wav_chan0.xml	0	0
14/07/2016 23:16	AMAR379.9.20160714T231641Z.wav_chan0.xml	0	0
14/07/2016 23:31	AMAR379.9.20160714T233108Z.wav_chan0.xml	0	0
14/07/2016 23:45	AMAR379.9.20160714T234535Z.wav_chan0.xml	0	0
15/07/2016 0:00	AMAR379.9.20160715T000002Z.wav_chan0.xml	0	0
15/07/2016 0:14	AMAR379.9.20160715T001429Z.wav_chan0.xml	0	0
15/07/2016 0:28	AMAR379.9.20160715T002856Z.wav_chan0.xml	0	0
15/07/2016 0:43	AMAR379.9.20160715T004323Z.wav_chan0.xml	0	0
15/07/2016 0:57	AMAR379.9.20160715T005750Z.wav_chan0.xml	0	0
15/07/2016 1:12	AMAR379.9.20160715T011217Z.wav_chan0.xml	0	0
15/07/2016 1:26	AMAR379.9.20160715T012644Z.wav_chan0.xml	0	0
15/07/2016 1:41	AMAR379.9.20160715T014111Z.wav_chan0.xml	0	0
15/07/2016 1:55	AMAR379.9.20160715T015538Z.wav_chan0.xml	0	0
15/07/2016 2:10	AMAR379.9.20160715T021005Z.wav_chan0.xml	0	0
15/07/2016 2:24	AMAR379.9.20160715T022432Z.wav_chan0.xml	0	0
15/07/2016 2:38	AMAR379.9.20160715T023859Z.wav_chan0.xml	0	0
15/07/2016 2:53	AMAR379.9.20160715T025326Z.wav_chan0.xml	0	0
15/07/2016 3:07	AMAR379.9.20160715T030753Z.wav_chan0.xml	0	0
15/07/2016 3:22	AMAR379.9.20160715T032220Z.wav_chan0.xml	0	0
15/07/2016 3:36	AMAR379.9.20160715T033647Z.wav_chan0.xml	0	0
15/07/2016 3:51	AMAR379.9.20160715T035114Z.wav_chan0.xml	0	0
15/07/2016 4:05	AMAR379.9.20160715T040541Z.wav_chan0.xml	0	0
15/07/2016 4:20	AMAR379.9.20160715T042008Z.wav_chan0.xml	0	0
15/07/2016 4:34	AMAR379.9.20160715T043435Z.wav_chan0.xml	0	0
15/07/2016 5:03	AMAR379.9.20160715T050329Z.wav_chan0.xml	0	0
15/07/2016 5:17	AMAR379.9.20160715T051756Z.wav_chan0.xml	0	0
15/07/2016 5:32	AMAR379.9.20160715T053223Z.wav_chan0.xml	0	0
15/07/2016 5:46	AMAR379.9.20160715T054650Z.wav_chan0.xml	0	0
15/07/2016 6:01	AMAR379.9.20160715T060117Z.wav_chan0.xml	0	0
15/07/2016 6:15	AMAR379.9.20160715T061544Z.wav_chan0.xml	0	0
15/07/2016 6:30	AMAR379.9.20160715T063011Z.wav_chan0.xml	0	0
15/07/2016 6:44	AMAR379.9.20160715T064438Z.wav_chan0.xml	0	0
15/07/2016 6:59	AMAR379.9.20160715T065905Z.wav_chan0.xml	0	0
15/07/2016 7:13	AMAR379.9.20160715T071332Z.wav_chan0.xml	0	0
15/07/2016 7:27	AMAR379.9.20160715T072759Z.wav_chan0.xml	0	0
15/07/2016 7:42	AMAR379.9.20160715T074226Z.wav_chan0.xml	0	0
15/07/2016 7:56	AMAR379.9.20160715T075653Z.wav_chan0.xml	0	0
15/07/2016 8:11	AMAR379.9.20160715T081120Z.wav_chan0.xml	0	0
15/07/2016 8:25	AMAR379.9.20160715T082547Z.wav_chan0.xml	0	0
15/07/2016 8:40	AMAR379.9.20160715T084014Z.wav_chan0.xml	0	0
15/07/2016 8:54	AMAR379.9.20160715T085441Z.wav_chan0.xml	0	0
15/07/2016 9:09	AMAR379.9.20160715T090908Z.wav_chan0.xml	0	0
15/07/2016 9:23	AMAR379.9.20160715T092335Z.wav_chan0.xml	0	0
15/07/2016 9:38	AMAR379.9.20160715T093802Z.wav_chan0.xml	0	0
15/07/2016 9:52	AMAR379.9.20160715T095229Z.wav_chan0.xml	0	0
15/07/2016 10:06	AMAR379.9.20160715T100656Z.wav_chan0.xml	0	0
15/07/2016 10:21	AMAR379.9.20160715T102123Z.wav_chan0.xml	0	0
15/07/2016 10:35	AMAR379.9.20160715T103550Z.wav_chan0.xml	0	0
15/07/2016 10:50	AMAR379.9.20160715T105017Z.wav_chan0.xml	0	0
15/07/2016 11:04	AMAR379.9.20160715T110444Z.wav_chan0.xml	0	0
15/07/2016 11:19	AMAR379.9.20160715T111911Z.wav_chan0.xml	0	0
15/07/2016 11:33	AMAR379.9.20160715T113338Z.wav_chan0.xml	0	0
15/07/2016 11:48	AMAR379.9.20160715T114805Z.wav_chan0.xml	0	0
15/07/2016 12:02	AMAR379.9.20160715T120232Z.wav_chan0.xml	0	0
15/07/2016 12:16	AMAR379.9.20160715T121659Z.wav_chan0.xml	0	0
15/07/2016 12:31	AMAR379.9.20160715T123126Z.wav_chan0.xml	0	0
15/07/2016 12:45	AMAR379.9.20160715T124553Z.wav_chan0.xml	0	0
15/07/2016 13:00	AMAR379.9.20160715T130020Z.wav_chan0.xml	0	0
15/07/2016 13:14	AMAR379.9.20160715T131447Z.wav_chan0.xml	0	0
15/07/2016 13:29	AMAR379.9.20160715T132914Z.wav_chan0.xml	0	0
15/07/2016 13:43	AMAR379.9.20160715T134341Z.wav_chan0.xml	0	0
15/07/2016 13:58	AMAR379.9.20160715T135808Z.wav_chan0.xml	1	0
15/07/2016 14:12	AMAR379.9.20160715T141235Z.wav_chan0.xml	0	0
15/07/2016 14:27	AMAR379.9.20160715T142702Z.wav_chan0.xml	0	0
15/07/2016 14:41	AMAR379.9.20160715T144129Z.wav_chan0.xml	0	0
15/07/2016 14:55	AMAR379.9.20160715T145556Z.wav_chan0.xml	0	0
15/07/2016 15:10	AMAR379.9.20160715T151023Z.wav_chan0.xml	0	0
15/07/2016 15:24	AMAR379.9.20160715T152450Z.wav_chan0.xml	0	0
15/07/2016 15:39	AMAR379.9.20160715T153917Z.wav_chan0.xml	0	0
15/07/2016 15:53	AMAR379.9.20160715T155344Z.wav_chan0.xml	0	0
15/07/2016 16:08	AMAR379.9.20160715T160811Z.wav_chan0.xml	0	0
15/07/2016 16:22	AMAR379.9.20160715T162238Z.wav_chan0.xml	0	0
15/07/2016 16:37	AMAR379.9.20160715T163705Z.wav_chan0.xml	0	0
15/07/2016 16:51	AMAR379.9.20160715T165132Z.wav_chan0.xml	0	0
15/07/2016 17:05	AMAR379.9.20160715T170559Z.wav_chan0.xml	0	0
15/07/2016 17:20	AMAR379.9.20160715T172026Z.wav_chan0.xml	0	0
15/07/2016 17:34	AMAR379.9.20160715T173453Z.wav_chan0.xml	0	0
15/07/2016 17:49	AMAR379.9.20160715T174920Z.wav_chan0.xml	0	0
15/07/2016 18:03	AMAR379.9.20160715T180347Z.wav_chan0.xml	0	0
15/07/2016 18:18	AMAR379.9.20160715T181814Z.wav_chan0.xml	0	0
15/07/2016 18:32	AMAR379.9.20160715T183241Z.wav_chan0.xml	0	0
15/07/2016 18:47	AMAR379.9.20160715T184708Z.wav_chan0.xml	0	0
15/07/2016 19:01	AMAR379.9.20160715T190135Z.wav_chan0.xml	0	0
15/07/2016 19:16	AMAR379.9.20160715T191602Z.wav_chan0.xml	0	0
15/07/2016 19:30	AMAR379.9.20160715T193029Z.wav_chan0.xml	0	0
15/07/2016 19:44	AMAR379.9.20160715T194456Z.wav_chan0.xml	0	0
15/07/2016 19:59	AMAR379.9.20160715T195923Z.wav_chan0.xml	4	0
15/07/2016 20:13	AMAR379.9.20160715T201350Z.wav_chan0.xml	0	0
15/07/2016 20:28	AMAR379.9.20160715T202817Z.wav_chan0.xml	0	0
15/07/2016 20:42	AMAR379.9.20160715T204244Z.wav_chan0.xml	0	0
15/07/2016 20:57	AMAR379.9.20160715T205711Z.wav_chan0.xml	0	0
15/07/2016 21:11	AMAR379.9.20160715T211138Z.wav_chan0.xml	1	0
15/07/2016 21:26	AMAR379.9.20160715T212605Z.wav_chan0.xml	0	0
15/07/2016 21:40	AMAR379.9.20160715T214032Z.wav_chan0.xml	0	0
15/07/2016 21:54	AMAR379.9.20160715T215459Z.wav_chan0.xml	0	0
15/07/2016 22:09	AMAR379.9.20160715T220926Z.wav_chan0.xml	0	0
15/07/2016 22:23	AMAR379.9.20160715T222353Z.wav_chan0.xml	0	0
15/07/2016 22:38	AMAR379.9.20160715T223820Z.wav_chan0.xml	0	0
15/07/2016 22:52	AMAR379.9.20160715T225247Z.wav_chan0.xml	0	0
15/07/2016 23:07	AMAR379.9.20160715T230714Z.wav_chan0.xml	0	0
15/07/2016 23:21	AMAR379.9.20160715T232141Z.wav_chan0.xml	0	0
15/07/2016 23:36	AMAR379.9.20160715T233608Z.wav_chan0.xml	0	0
15/07/2016 23:50	AMAR379.9.20160715T235035Z.wav_chan0.xml	0	0
16/07/2016 0:05	AMAR379.9.20160716T000502Z.wav_chan0.xml	0	0
16/07/2016 0:19	AMAR379.9.20160716T001929Z.wav_chan0.xml	0	0
16/07/2016 0:33	AMAR379.9.20160716T003356Z.wav_chan0.xml	0	0
16/07/2016 0:48	AMAR379.9.20160716T004823Z.wav_chan0.xml	0	0
16/07/2016 1:02	AMAR379.9.20160716T010250Z.wav_chan0.xml	0	0
16/07/2016 1:17	AMAR379.9.20160716T011717Z.wav_chan0.xml	0	0
16/07/2016 1:31	AMAR379.9.20160716T013144Z.wav_chan0.xml	0	0
16/07/2016 1:46	AMAR379.9.20160716T014611Z.wav_chan0.xml	0	0
16/07/2016 2:00	AMAR379.9.20160716T020038Z.wav_chan0.xml	0	0
16/07/2016 2:15	AMAR379.9.20160716T021505Z.wav_chan0.xml	0	0
16/07/2016 2:29	AMAR379.9.20160716T022932Z.wav_chan0.xml	0	0
16/07/2016 2:43	AMAR379.9.20160716T024359Z.wav_chan0.xml	0	0
16/07/2016 2:58	AMAR379.9.20160716T025826Z.wav_chan0.xml	0	0
16/07/2016 3:12	AMAR379.9.20160716T031253Z.wav_chan0.xml	0	0
16/07/2016 3:27	AMAR379.9.20160716T032720Z.wav_chan0.xml	0	0
16/07/2016 3:41	AMAR379.9.20160716T034147Z.wav_chan0.xml	4	0
16/07/2016 3:56	AMAR379.9.20160716T035614Z.wav_chan0.xml	0	0
16/07/2016 4:10	AMAR379.9.20160716T041041Z.wav_chan0.xml	0	0
16/07/2016 4:25	AMAR379.9.20160716T042508Z.wav_chan0.xml	0	0
16/07/2016 4:39	AMAR379.9.20160716T043935Z.wav_chan0.xml	0	0
16/07/2016 4:54	AMAR379.9.20160716T045402Z.wav_chan0.xml	0	0
16/07/2016 5:08	AMAR379.9.20160716T050829Z.wav_chan0.xml	0	0
16/07/2016 5:22	AMAR379.9.20160716T052256Z.wav_chan0.xml	0	0
16/07/2016 5:37	AMAR379.9.20160716T053723Z.wav_chan0.xml	0	0
16/07/2016 5:51	AMAR379.9.20160716T055150Z.wav_chan0.xml	0	0
16/07/2016 6:06	AMAR379.9.20160716T060617Z.wav_chan0.xml	0	0
16/07/2016 6:20	AMAR379.9.20160716T062044Z.wav_chan0.xml	0	0
16/07/2016 6:35	AMAR379.9.20160716T063511Z.wav_chan0.xml	0	0
16/07/2016 6:49	AMAR379.9.20160716T064938Z.wav_chan0.xml	0	0
16/07/2016 7:04	AMAR379.9.20160716T070405Z.wav_chan0.xml	0	0
16/07/2016 7:18	AMAR379.9.20160716T071832Z.wav_chan0.xml	0	0
16/07/2016 7:32	AMAR379.9.20160716T073259Z.wav_chan0.xml	0	0
16/07/2016 7:47	AMAR379.9.20160716T074726Z.wav_chan0.xml	10	0
16/07/2016 8:01	AMAR379.9.20160716T080153Z.wav_chan0.xml	6	0
16/07/2016 8:16	AMAR379.9.20160716T081620Z.wav_chan0.xml	0	0
16/07/2016 8:30	AMAR379.9.20160716T083047Z.wav_chan0.xml	7	0
16/07/2016 8:45	AMAR379.9.20160716T084514Z.wav_chan0.xml	3	0
16/07/2016 8:59	AMAR379.9.20160716T085941Z.wav_chan0.xml	0	0
16/07/2016 9:14	AMAR379.9.20160716T091408Z.wav_chan0.xml	0	0
16/07/2016 9:28	AMAR379.9.20160716T092835Z.wav_chan0.xml	0	0
16/07/2016 9:43	AMAR379.9.20160716T094302Z.wav_chan0.xml	0	0
16/07/2016 9:57	AMAR379.9.20160716T095729Z.wav_chan0.xml	0	0
16/07/2016 10:11	AMAR379.9.20160716T101156Z.wav_chan0.xml	0	0
16/07/2016 10:26	AMAR379.9.20160716T102623Z.wav_chan0.xml	0	0
16/07/2016 10:40	AMAR379.9.20160716T104050Z.wav_chan0.xml	0	0
16/07/2016 10:55	AMAR379.9.20160716T105517Z.wav_chan0.xml	0	0
16/07/2016 11:09	AMAR379.9.20160716T110944Z.wav_chan0.xml	0	0
16/07/2016 11:24	AMAR379.9.20160716T112411Z.wav_chan0.xml	0	0
16/07/2016 11:38	AMAR379.9.20160716T113838Z.wav_chan0.xml	0	0
16/07/2016 11:53	AMAR379.9.20160716T115305Z.wav_chan0.xml	0	0
16/07/2016 12:07	AMAR379.9.20160716T120732Z.wav_chan0.xml	0	0
16/07/2016 12:21	AMAR379.9.20160716T122159Z.wav_chan0.xml	0	0
16/07/2016 12:36	AMAR379.9.20160716T123626Z.wav_chan0.xml	0	0
16/07/2016 12:50	AMAR379.9.20160716T125053Z.wav_chan0.xml	0	0
16/07/2016 13:05	AMAR379.9.20160716T130520Z.wav_chan0.xml	0	0
16/07/2016 13:19	AMAR379.9.20160716T131947Z.wav_chan0.xml	0	0
16/07/2016 13:34	AMAR379.9.20160716T133414Z.wav_chan0.xml	0	0
16/07/2016 13:48	AMAR379.9.20160716T134841Z.wav_chan0.xml	0	0
16/07/2016 14:03	AMAR379.9.20160716T140308Z.wav_chan0.xml	0	0
16/07/2016 14:17	AMAR379.9.20160716T141735Z.wav_chan0.xml	0	0
16/07/2016 14:32	AMAR379.9.20160716T143202Z.wav_chan0.xml	0	0
16/07/2016 14:46	AMAR379.9.20160716T144629Z.wav_chan0.xml	0	0
16/07/2016 15:00	AMAR379.9.20160716T150056Z.wav_chan0.xml	0	0
16/07/2016 15:15	AMAR379.9.20160716T151523Z.wav_chan0.xml	0	0
16/07/2016 15:29	AMAR379.9.20160716T152950Z.wav_chan0.xml	0	0
16/07/2016 15:44	AMAR379.9.20160716T154417Z.wav_chan0.xml	0	0
16/07/2016 15:58	AMAR379.9.20160716T155844Z.wav_chan0.xml	0	0
16/07/2016 16:13	AMAR379.9.20160716T161311Z.wav_chan0.xml	0	0
16/07/2016 16:27	AMAR379.9.20160716T162738Z.wav_chan0.xml	0	0
16/07/2016 16:42	AMAR379.9.20160716T164205Z.wav_chan0.xml	0	0
16/07/2016 16:56	AMAR379.9.20160716T165632Z.wav_chan0.xml	0	0
16/07/2016 17:10	AMAR379.9.20160716T171059Z.wav_chan0.xml	0	0
16/07/2016 17:25	AMAR379.9.20160716T172526Z.wav_chan0.xml	0	0
16/07/2016 17:39	AMAR379.9.20160716T173953Z.wav_chan0.xml	0	0
16/07/2016 17:54	AMAR379.9.20160716T175420Z.wav_chan0.xml	0	0
16/07/2016 18:08	AMAR379.9.20160716T180847Z.wav_chan0.xml	0	0
16/07/2016 18:23	AMAR379.9.20160716T182314Z.wav_chan0.xml	0	0
16/07/2016 18:37	AMAR379.9.20160716T183741Z.wav_chan0.xml	0	0
16/07/2016 18:52	AMAR379.9.20160716T185208Z.wav_chan0.xml	0	0
16/07/2016 19:06	AMAR379.9.20160716T190635Z.wav_chan0.xml	0	0
16/07/2016 19:21	AMAR379.9.20160716T192102Z.wav_chan0.xml	0	0
16/07/2016 19:35	AMAR379.9.20160716T193529Z.wav_chan0.xml	0	0
16/07/2016 19:49	AMAR379.9.20160716T194956Z.wav_chan0.xml	0	0
16/07/2016 20:04	AMAR379.9.20160716T200423Z.wav_chan0.xml	0	0
16/07/2016 20:18	AMAR379.9.20160716T201850Z.wav_chan0.xml	0	0
16/07/2016 20:33	AMAR379.9.20160716T203317Z.wav_chan0.xml	0	0
16/07/2016 20:47	AMAR379.9.20160716T204744Z.wav_chan0.xml	0	0
16/07/2016 21:02	AMAR379.9.20160716T210211Z.wav_chan0.xml	0	0
16/07/2016 21:16	AMAR379.9.20160716T211638Z.wav_chan0.xml	0	0
16/07/2016 21:31	AMAR379.9.20160716T213105Z.wav_chan0.xml	0	0
16/07/2016 21:45	AMAR379.9.20160716T214532Z.wav_chan0.xml	0	0
16/07/2016 21:59	AMAR379.9.20160716T215959Z.wav_chan0.xml	0	0
16/07/2016 22:14	AMAR379.9.20160716T221426Z.wav_chan0.xml	0	0
16/07/2016 22:28	AMAR379.9.20160716T222853Z.wav_chan0.xml	0	0
16/07/2016 22:43	AMAR379.9.20160716T224320Z.wav_chan0.xml	0	0
16/07/2016 22:57	AMAR379.9.20160716T225747Z.wav_chan0.xml	0	0
16/07/2016 23:12	AMAR379.9.20160716T231214Z.wav_chan0.xml	0	0
16/07/2016 23:26	AMAR379.9.20160716T232641Z.wav_chan0.xml	0	0
16/07/2016 23:41	AMAR379.9.20160716T234108Z.wav_chan0.xml	0	0
16/07/2016 23:55	AMAR379.9.20160716T235535Z.wav_chan0.xml	0	0
17/07/2016 0:10	AMAR379.9.20160717T001002Z.wav_chan0.xml	0	0
17/07/2016 0:24	AMAR379.9.20160717T002429Z.wav_chan0.xml	0	0
17/07/2016 0:38	AMAR379.9.20160717T003856Z.wav_chan0.xml	0	0
17/07/2016 0:53	AMAR379.9.20160717T005323Z.wav_chan0.xml	0	0
17/07/2016 1:07	AMAR379.9.20160717T010750Z.wav_chan0.xml	0	0
17/07/2016 1:22	AMAR379.9.20160717T012217Z.wav_chan0.xml	0	0
17/07/2016 1:36	AMAR379.9.20160717T013644Z.wav_chan0.xml	0	0
17/07/2016 1:51	AMAR379.9.20160717T015111Z.wav_chan0.xml	0	0
17/07/2016 2:05	AMAR379.9.20160717T020538Z.wav_chan0.xml	0	0
17/07/2016 2:20	AMAR379.9.20160717T022005Z.wav_chan0.xml	0	0
17/07/2016 2:34	AMAR379.9.20160717T023432Z.wav_chan0.xml	1	0
17/07/2016 2:48	AMAR379.9.20160717T024859Z.wav_chan0.xml	0	0
17/07/2016 3:03	AMAR379.9.20160717T030326Z.wav_chan0.xml	0	0
17/07/2016 3:17	AMAR379.9.20160717T031753Z.wav_chan0.xml	0	0
17/07/2016 3:32	AMAR379.9.20160717T033220Z.wav_chan0.xml	0	0
17/07/2016 3:46	AMAR379.9.20160717T034647Z.wav_chan0.xml	0	0
17/07/2016 4:01	AMAR379.9.20160717T040114Z.wav_chan0.xml	0	0
17/07/2016 4:15	AMAR379.9.20160717T041541Z.wav_chan0.xml	0	0
17/07/2016 4:30	AMAR379.9.20160717T043008Z.wav_chan0.xml	0	0
17/07/2016 4:44	AMAR379.9.20160717T044435Z.wav_chan0.xml	0	0
17/07/2016 4:59	AMAR379.9.20160717T045902Z.wav_chan0.xml	0	0
17/07/2016 5:13	AMAR379.9.20160717T051329Z.wav_chan0.xml	0	0
17/07/2016 5:27	AMAR379.9.20160717T052756Z.wav_chan0.xml	0	0
17/07/2016 5:42	AMAR379.9.20160717T054223Z.wav_chan0.xml	0	0
17/07/2016 5:56	AMAR379.9.20160717T055650Z.wav_chan0.xml	0	0
17/07/2016 6:11	AMAR379.9.20160717T061117Z.wav_chan0.xml	0	0
17/07/2016 6:25	AMAR379.9.20160717T062544Z.wav_chan0.xml	0	0
17/07/2016 6:40	AMAR379.9.20160717T064011Z.wav_chan0.xml	0	0
17/07/2016 6:54	AMAR379.9.20160717T065438Z.wav_chan0.xml	0	0
17/07/2016 7:09	AMAR379.9.20160717T070905Z.wav_chan0.xml	0	0
17/07/2016 7:23	AMAR379.9.20160717T072332Z.wav_chan0.xml	0	0
17/07/2016 7:37	AMAR379.9.20160717T073759Z.wav_chan0.xml	0	0
17/07/2016 7:52	AMAR379.9.20160717T075226Z.wav_chan0.xml	0	0
17/07/2016 8:06	AMAR379.9.20160717T080653Z.wav_chan0.xml	0	0
17/07/2016 8:21	AMAR379.9.20160717T082120Z.wav_chan0.xml	0	0
17/07/2016 8:35	AMAR379.9.20160717T083547Z.wav_chan0.xml	4	0
17/07/2016 8:50	AMAR379.9.20160717T085014Z.wav_chan0.xml	1	0
17/07/2016 9:04	AMAR379.9.20160717T090441Z.wav_chan0.xml	0	0
17/07/2016 9:19	AMAR379.9.20160717T091908Z.wav_chan0.xml	0	0
17/07/2016 9:33	AMAR379.9.20160717T093335Z.wav_chan0.xml	0	0
17/07/2016 9:48	AMAR379.9.20160717T094802Z.wav_chan0.xml	0	0
17/07/2016 10:02	AMAR379.9.20160717T100229Z.wav_chan0.xml	0	0
17/07/2016 10:16	AMAR379.9.20160717T101656Z.wav_chan0.xml	0	0
17/07/2016 10:31	AMAR379.9.20160717T103123Z.wav_chan0.xml	3	0
17/07/2016 10:45	AMAR379.9.20160717T104550Z.wav_chan0.xml	0	0
17/07/2016 11:00	AMAR379.9.20160717T110017Z.wav_chan0.xml	0	0
17/07/2016 11:14	AMAR379.9.20160717T111444Z.wav_chan0.xml	0	0
17/07/2016 11:29	AMAR379.9.20160717T112911Z.wav_chan0.xml	0	0
17/07/2016 11:43	AMAR379.9.20160717T114338Z.wav_chan0.xml	0	0
17/07/2016 11:58	AMAR379.9.20160717T115805Z.wav_chan0.xml	0	0
17/07/2016 12:12	AMAR379.9.20160717T121232Z.wav_chan0.xml	0	0
17/07/2016 12:26	AMAR379.9.20160717T122659Z.wav_chan0.xml	0	0
17/07/2016 12:41	AMAR379.9.20160717T124126Z.wav_chan0.xml	0	0
17/07/2016 12:55	AMAR379.9.20160717T125553Z.wav_chan0.xml	0	0
17/07/2016 13:10	AMAR379.9.20160717T131020Z.wav_chan0.xml	0	0
17/07/2016 13:24	AMAR379.9.20160717T132447Z.wav_chan0.xml	0	0
17/07/2016 13:39	AMAR379.9.20160717T133914Z.wav_chan0.xml	0	0
17/07/2016 13:53	AMAR379.9.20160717T135341Z.wav_chan0.xml	0	0
17/07/2016 14:08	AMAR379.9.20160717T140808Z.wav_chan0.xml	0	0
17/07/2016 14:22	AMAR379.9.20160717T142235Z.wav_chan0.xml	0	0
17/07/2016 14:37	AMAR379.9.20160717T143702Z.wav_chan0.xml	0	0
17/07/2016 14:51	AMAR379.9.20160717T145129Z.wav_chan0.xml	0	0
17/07/2016 15:05	AMAR379.9.20160717T150556Z.wav_chan0.xml	0	0
17/07/2016 15:20	AMAR379.9.20160717T152023Z.wav_chan0.xml	0	0
17/07/2016 15:34	AMAR379.9.20160717T153450Z.wav_chan0.xml	0	0
17/07/2016 15:49	AMAR379.9.20160717T154917Z.wav_chan0.xml	0	0
17/07/2016 16:03	AMAR379.9.20160717T160344Z.wav_chan0.xml	0	0
17/07/2016 16:18	AMAR379.9.20160717T161811Z.wav_chan0.xml	0	0
17/07/2016 16:32	AMAR379.9.20160717T163238Z.wav_chan0.xml	0	0
17/07/2016 16:47	AMAR379.9.20160717T164705Z.wav_chan0.xml	0	0
17/07/2016 17:01	AMAR379.9.20160717T170132Z.wav_chan0.xml	0	0
17/07/2016 17:15	AMAR379.9.20160717T171559Z.wav_chan0.xml	0	0
17/07/2016 17:30	AMAR379.9.20160717T173026Z.wav_chan0.xml	0	0
17/07/2016 17:44	AMAR379.9.20160717T174453Z.wav_chan0.xml	0	0
17/07/2016 17:59	AMAR379.9.20160717T175920Z.wav_chan0.xml	0	0
17/07/2016 18:13	AMAR379.9.20160717T181347Z.wav_chan0.xml	0	0
17/07/2016 18:28	AMAR379.9.20160717T182814Z.wav_chan0.xml	0	0
17/07/2016 18:42	AMAR379.9.20160717T184241Z.wav_chan0.xml	0	0
17/07/2016 18:57	AMAR379.9.20160717T185708Z.wav_chan0.xml	0	0
17/07/2016 19:11	AMAR379.9.20160717T191135Z.wav_chan0.xml	0	0
17/07/2016 19:26	AMAR379.9.20160717T192602Z.wav_chan0.xml	0	0
17/07/2016 19:40	AMAR379.9.20160717T194029Z.wav_chan0.xml	0	0
17/07/2016 19:54	AMAR379.9.20160717T195456Z.wav_chan0.xml	0	0
17/07/2016 20:09	AMAR379.9.20160717T200923Z.wav_chan0.xml	0	0
17/07/2016 20:23	AMAR379.9.20160717T202350Z.wav_chan0.xml	0	0
17/07/2016 20:38	AMAR379.9.20160717T203817Z.wav_chan0.xml	0	0
17/07/2016 20:52	AMAR379.9.20160717T205244Z.wav_chan0.xml	0	0
17/07/2016 21:07	AMAR379.9.20160717T210711Z.wav_chan0.xml	0	0
17/07/2016 21:21	AMAR379.9.20160717T212138Z.wav_chan0.xml	0	0
17/07/2016 21:36	AMAR379.9.20160717T213605Z.wav_chan0.xml	0	0
17/07/2016 21:50	AMAR379.9.20160717T215032Z.wav_chan0.xml	0	0
17/07/2016 22:04	AMAR379.9.20160717T220459Z.wav_chan0.xml	0	0
17/07/2016 22:19	AMAR379.9.20160717T221926Z.wav_chan0.xml	0	0
17/07/2016 22:33	AMAR379.9.20160717T223353Z.wav_chan0.xml	0	0
17/07/2016 22:48	AMAR379.9.20160717T224820Z.wav_chan0.xml	0	0
17/07/2016 23:02	AMAR379.9.20160717T230247Z.wav_chan0.xml	0	0
17/07/2016 23:17	AMAR379.9.20160717T231714Z.wav_chan0.xml	0	0
17/07/2016 23:31	AMAR379.9.20160717T233141Z.wav_chan0.xml	0	0
17/07/2016 23:46	AMAR379.9.20160717T234608Z.wav_chan0.xml	0	0
18/07/2016 0:00	AMAR379.9.20160718T000035Z.wav_chan0.xml	0	0
18/07/2016 0:15	AMAR379.9.20160718T001502Z.wav_chan0.xml	0	0
18/07/2016 0:29	AMAR379.9.20160718T002929Z.wav_chan0.xml	0	0
18/07/2016 0:43	AMAR379.9.20160718T004356Z.wav_chan0.xml	0	0
18/07/2016 0:58	AMAR379.9.20160718T005823Z.wav_chan0.xml	0	0
18/07/2016 1:12	AMAR379.9.20160718T011250Z.wav_chan0.xml	0	0
18/07/2016 1:27	AMAR379.9.20160718T012717Z.wav_chan0.xml	0	0
18/07/2016 1:41	AMAR379.9.20160718T014144Z.wav_chan0.xml	0	0
18/07/2016 1:56	AMAR379.9.20160718T015611Z.wav_chan0.xml	0	0
18/07/2016 2:10	AMAR379.9.20160718T021038Z.wav_chan0.xml	0	0
18/07/2016 2:25	AMAR379.9.20160718T022505Z.wav_chan0.xml	0	0
18/07/2016 2:39	AMAR379.9.20160718T023932Z.wav_chan0.xml	0	0
18/07/2016 2:53	AMAR379.9.20160718T025359Z.wav_chan0.xml	0	0
18/07/2016 3:08	AMAR379.9.20160718T030826Z.wav_chan0.xml	0	0
18/07/2016 3:22	AMAR379.9.20160718T032253Z.wav_chan0.xml	0	0
18/07/2016 3:37	AMAR379.9.20160718T033720Z.wav_chan0.xml	0	0
18/07/2016 3:51	AMAR379.9.20160718T035147Z.wav_chan0.xml	0	0
18/07/2016 4:06	AMAR379.9.20160718T040614Z.wav_chan0.xml	0	0
18/07/2016 4:20	AMAR379.9.20160718T042041Z.wav_chan0.xml	0	0
18/07/2016 4:35	AMAR379.9.20160718T043508Z.wav_chan0.xml	0	0
18/07/2016 4:49	AMAR379.9.20160718T044935Z.wav_chan0.xml	0	0
18/07/2016 5:04	AMAR379.9.20160718T050402Z.wav_chan0.xml	0	0
18/07/2016 5:18	AMAR379.9.20160718T051829Z.wav_chan0.xml	0	0
18/07/2016 5:32	AMAR379.9.20160718T053256Z.wav_chan0.xml	0	0
18/07/2016 5:47	AMAR379.9.20160718T054723Z.wav_chan0.xml	0	0
18/07/2016 6:01	AMAR379.9.20160718T060150Z.wav_chan0.xml	0	0
18/07/2016 6:16	AMAR379.9.20160718T061617Z.wav_chan0.xml	0	0
18/07/2016 6:30	AMAR379.9.20160718T063044Z.wav_chan0.xml	0	0
18/07/2016 6:45	AMAR379.9.20160718T064511Z.wav_chan0.xml	14	1
18/07/2016 6:59	AMAR379.9.20160718T065938Z.wav_chan0.xml	0	0
18/07/2016 7:14	AMAR379.9.20160718T071405Z.wav_chan0.xml	1	0
18/07/2016 7:28	AMAR379.9.20160718T072832Z.wav_chan0.xml	0	0
18/07/2016 7:42	AMAR379.9.20160718T074259Z.wav_chan0.xml	0	0
18/07/2016 7:57	AMAR379.9.20160718T075726Z.wav_chan0.xml	0	0
18/07/2016 8:11	AMAR379.9.20160718T081153Z.wav_chan0.xml	0	0
18/07/2016 8:26	AMAR379.9.20160718T082620Z.wav_chan0.xml	0	0
18/07/2016 8:40	AMAR379.9.20160718T084047Z.wav_chan0.xml	0	0
18/07/2016 8:55	AMAR379.9.20160718T085514Z.wav_chan0.xml	0	0
18/07/2016 9:09	AMAR379.9.20160718T090941Z.wav_chan0.xml	0	0
18/07/2016 9:24	AMAR379.9.20160718T092408Z.wav_chan0.xml	0	0
18/07/2016 9:38	AMAR379.9.20160718T093835Z.wav_chan0.xml	0	0
18/07/2016 9:53	AMAR379.9.20160718T095302Z.wav_chan0.xml	1	0
18/07/2016 10:07	AMAR379.9.20160718T100729Z.wav_chan0.xml	3	0
18/07/2016 10:21	AMAR379.9.20160718T102156Z.wav_chan0.xml	1	0
18/07/2016 10:36	AMAR379.9.20160718T103623Z.wav_chan0.xml	0	0
18/07/2016 10:50	AMAR379.9.20160718T105050Z.wav_chan0.xml	0	0
18/07/2016 11:05	AMAR379.9.20160718T110517Z.wav_chan0.xml	0	0
18/07/2016 11:19	AMAR379.9.20160718T111944Z.wav_chan0.xml	0	0
18/07/2016 11:34	AMAR379.9.20160718T113411Z.wav_chan0.xml	0	0
18/07/2016 11:48	AMAR379.9.20160718T114838Z.wav_chan0.xml	0	0
18/07/2016 12:03	AMAR379.9.20160718T120305Z.wav_chan0.xml	0	0
18/07/2016 12:17	AMAR379.9.20160718T121732Z.wav_chan0.xml	0	0
18/07/2016 12:31	AMAR379.9.20160718T123159Z.wav_chan0.xml	0	0
18/07/2016 12:46	AMAR379.9.20160718T124626Z.wav_chan0.xml	0	0
18/07/2016 13:00	AMAR379.9.20160718T130053Z.wav_chan0.xml	0	0
18/07/2016 13:15	AMAR379.9.20160718T131520Z.wav_chan0.xml	0	0
18/07/2016 13:29	AMAR379.9.20160718T132947Z.wav_chan0.xml	0	0
18/07/2016 13:44	AMAR379.9.20160718T134414Z.wav_chan0.xml	0	0
18/07/2016 13:58	AMAR379.9.20160718T135841Z.wav_chan0.xml	0	0
18/07/2016 14:13	AMAR379.9.20160718T141308Z.wav_chan0.xml	0	0
18/07/2016 14:27	AMAR379.9.20160718T142735Z.wav_chan0.xml	0	0
18/07/2016 14:42	AMAR379.9.20160718T144202Z.wav_chan0.xml	0	0
18/07/2016 14:56	AMAR379.9.20160718T145629Z.wav_chan0.xml	0	0
18/07/2016 15:10	AMAR379.9.20160718T151056Z.wav_chan0.xml	0	0
18/07/2016 15:25	AMAR379.9.20160718T152523Z.wav_chan0.xml	0	0
18/07/2016 15:39	AMAR379.9.20160718T153950Z.wav_chan0.xml	0	0
18/07/2016 15:54	AMAR379.9.20160718T155417Z.wav_chan0.xml	0	0
18/07/2016 16:08	AMAR379.9.20160718T160844Z.wav_chan0.xml	0	0
18/07/2016 16:23	AMAR379.9.20160718T162311Z.wav_chan0.xml	0	0
18/07/2016 16:37	AMAR379.9.20160718T163738Z.wav_chan0.xml	0	0
18/07/2016 16:52	AMAR379.9.20160718T165205Z.wav_chan0.xml	0	0
18/07/2016 17:06	AMAR379.9.20160718T170632Z.wav_chan0.xml	0	0
18/07/2016 17:20	AMAR379.9.20160718T172059Z.wav_chan0.xml	0	0
18/07/2016 17:35	AMAR379.9.20160718T173526Z.wav_chan0.xml	0	0
18/07/2016 17:49	AMAR379.9.20160718T174953Z.wav_chan0.xml	0	0
18/07/2016 18:04	AMAR379.9.20160718T180420Z.wav_chan0.xml	0	0
18/07/2016 18:18	AMAR379.9.20160718T181847Z.wav_chan0.xml	0	0
18/07/2016 18:33	AMAR379.9.20160718T183314Z.wav_chan0.xml	0	0
18/07/2016 18:47	AMAR379.9.20160718T184741Z.wav_chan0.xml	0	0
18/07/2016 19:02	AMAR379.9.20160718T190208Z.wav_chan0.xml	0	0
18/07/2016 19:16	AMAR379.9.20160718T191635Z.wav_chan0.xml	0	0
18/07/2016 19:31	AMAR379.9.20160718T193102Z.wav_chan0.xml	0	0
18/07/2016 19:45	AMAR379.9.20160718T194529Z.wav_chan0.xml	0	0
18/07/2016 19:59	AMAR379.9.20160718T195956Z.wav_chan0.xml	0	0
18/07/2016 20:14	AMAR379.9.20160718T201423Z.wav_chan0.xml	0	0
18/07/2016 20:28	AMAR379.9.20160718T202850Z.wav_chan0.xml	0	0
18/07/2016 20:43	AMAR379.9.20160718T204317Z.wav_chan0.xml	0	0
18/07/2016 20:57	AMAR379.9.20160718T205744Z.wav_chan0.xml	0	0
18/07/2016 21:12	AMAR379.9.20160718T211211Z.wav_chan0.xml	0	0
18/07/2016 21:26	AMAR379.9.20160718T212638Z.wav_chan0.xml	0	0
18/07/2016 21:41	AMAR379.9.20160718T214105Z.wav_chan0.xml	0	0
18/07/2016 21:55	AMAR379.9.20160718T215532Z.wav_chan0.xml	0	0
18/07/2016 22:09	AMAR379.9.20160718T220959Z.wav_chan0.xml	0	0
18/07/2016 22:24	AMAR379.9.20160718T222426Z.wav_chan0.xml	0	0
18/07/2016 22:38	AMAR379.9.20160718T223853Z.wav_chan0.xml	0	0
18/07/2016 22:53	AMAR379.9.20160718T225320Z.wav_chan0.xml	0	0
18/07/2016 23:07	AMAR379.9.20160718T230747Z.wav_chan0.xml	0	0
18/07/2016 23:22	AMAR379.9.20160718T232214Z.wav_chan0.xml	0	0
18/07/2016 23:36	AMAR379.9.20160718T233641Z.wav_chan0.xml	0	0
18/07/2016 23:51	AMAR379.9.20160718T235108Z.wav_chan0.xml	4	0
19/07/2016 0:05	AMAR379.9.20160719T000535Z.wav_chan0.xml	0	0
19/07/2016 0:20	AMAR379.9.20160719T002002Z.wav_chan0.xml	0	0
19/07/2016 0:34	AMAR379.9.20160719T003429Z.wav_chan0.xml	0	0
19/07/2016 0:48	AMAR379.9.20160719T004856Z.wav_chan0.xml	0	0
19/07/2016 1:03	AMAR379.9.20160719T010323Z.wav_chan0.xml	0	0
19/07/2016 1:17	AMAR379.9.20160719T011750Z.wav_chan0.xml	0	0
19/07/2016 1:32	AMAR379.9.20160719T013217Z.wav_chan0.xml	0	0
19/07/2016 1:46	AMAR379.9.20160719T014644Z.wav_chan0.xml	0	0
19/07/2016 2:01	AMAR379.9.20160719T020111Z.wav_chan0.xml	0	0
19/07/2016 2:15	AMAR379.9.20160719T021538Z.wav_chan0.xml	0	0
19/07/2016 2:30	AMAR379.9.20160719T023005Z.wav_chan0.xml	0	0
19/07/2016 2:44	AMAR379.9.20160719T024432Z.wav_chan0.xml	0	0
19/07/2016 2:58	AMAR379.9.20160719T025859Z.wav_chan0.xml	0	0
19/07/2016 3:13	AMAR379.9.20160719T031326Z.wav_chan0.xml	9	0
19/07/2016 3:27	AMAR379.9.20160719T032753Z.wav_chan0.xml	2	0
19/07/2016 3:42	AMAR379.9.20160719T034220Z.wav_chan0.xml	0	0
19/07/2016 3:56	AMAR379.9.20160719T035647Z.wav_chan0.xml	0	0
19/07/2016 4:11	AMAR379.9.20160719T041114Z.wav_chan0.xml	0	0
19/07/2016 4:25	AMAR379.9.20160719T042541Z.wav_chan0.xml	7	0
19/07/2016 4:40	AMAR379.9.20160719T044008Z.wav_chan0.xml	0	0
19/07/2016 4:54	AMAR379.9.20160719T045435Z.wav_chan0.xml	0	0
19/07/2016 5:09	AMAR379.9.20160719T050902Z.wav_chan0.xml	0	0
19/07/2016 5:23	AMAR379.9.20160719T052329Z.wav_chan0.xml	0	0
19/07/2016 5:37	AMAR379.9.20160719T053756Z.wav_chan0.xml	0	0
19/07/2016 5:52	AMAR379.9.20160719T055223Z.wav_chan0.xml	0	0
19/07/2016 6:06	AMAR379.9.20160719T060650Z.wav_chan0.xml	0	0
19/07/2016 6:21	AMAR379.9.20160719T062117Z.wav_chan0.xml	0	0
19/07/2016 6:35	AMAR379.9.20160719T063544Z.wav_chan0.xml	0	0
19/07/2016 6:50	AMAR379.9.20160719T065011Z.wav_chan0.xml	0	0
19/07/2016 7:04	AMAR379.9.20160719T070438Z.wav_chan0.xml	0	0
19/07/2016 7:19	AMAR379.9.20160719T071905Z.wav_chan0.xml	0	0
19/07/2016 7:33	AMAR379.9.20160719T073332Z.wav_chan0.xml	0	0
19/07/2016 7:47	AMAR379.9.20160719T074759Z.wav_chan0.xml	0	0
19/07/2016 8:02	AMAR379.9.20160719T080226Z.wav_chan0.xml	0	0
19/07/2016 8:16	AMAR379.9.20160719T081653Z.wav_chan0.xml	0	2
19/07/2016 8:31	AMAR379.9.20160719T083120Z.wav_chan0.xml	0	0
19/07/2016 8:45	AMAR379.9.20160719T084547Z.wav_chan0.xml	0	0
19/07/2016 9:00	AMAR379.9.20160719T090014Z.wav_chan0.xml	0	0
19/07/2016 9:14	AMAR379.9.20160719T091441Z.wav_chan0.xml	0	2
19/07/2016 9:29	AMAR379.9.20160719T092908Z.wav_chan0.xml	0	0
19/07/2016 9:43	AMAR379.9.20160719T094335Z.wav_chan0.xml	0	0
19/07/2016 9:58	AMAR379.9.20160719T095802Z.wav_chan0.xml	0	0
19/07/2016 10:12	AMAR379.9.20160719T101229Z.wav_chan0.xml	0	0
19/07/2016 10:26	AMAR379.9.20160719T102656Z.wav_chan0.xml	0	0
19/07/2016 10:41	AMAR379.9.20160719T104123Z.wav_chan0.xml	0	0
19/07/2016 10:55	AMAR379.9.20160719T105550Z.wav_chan0.xml	0	0
19/07/2016 11:10	AMAR379.9.20160719T111017Z.wav_chan0.xml	0	0
19/07/2016 11:24	AMAR379.9.20160719T112444Z.wav_chan0.xml	0	0
19/07/2016 11:39	AMAR379.9.20160719T113911Z.wav_chan0.xml	0	0
19/07/2016 11:53	AMAR379.9.20160719T115338Z.wav_chan0.xml	0	0
19/07/2016 12:08	AMAR379.9.20160719T120805Z.wav_chan0.xml	0	0
19/07/2016 12:22	AMAR379.9.20160719T122232Z.wav_chan0.xml	0	0
19/07/2016 12:36	AMAR379.9.20160719T123659Z.wav_chan0.xml	0	0
19/07/2016 12:51	AMAR379.9.20160719T125126Z.wav_chan0.xml	0	0
19/07/2016 13:05	AMAR379.9.20160719T130553Z.wav_chan0.xml	0	0
19/07/2016 13:20	AMAR379.9.20160719T132020Z.wav_chan0.xml	0	0
19/07/2016 13:34	AMAR379.9.20160719T133447Z.wav_chan0.xml	0	0
19/07/2016 13:49	AMAR379.9.20160719T134914Z.wav_chan0.xml	0	0
19/07/2016 14:03	AMAR379.9.20160719T140341Z.wav_chan0.xml	0	0
19/07/2016 14:18	AMAR379.9.20160719T141808Z.wav_chan0.xml	0	0
19/07/2016 14:32	AMAR379.9.20160719T143235Z.wav_chan0.xml	0	0
19/07/2016 14:47	AMAR379.9.20160719T144702Z.wav_chan0.xml	0	0
19/07/2016 15:01	AMAR379.9.20160719T150129Z.wav_chan0.xml	0	0
19/07/2016 15:15	AMAR379.9.20160719T151556Z.wav_chan0.xml	0	0
19/07/2016 15:30	AMAR379.9.20160719T153023Z.wav_chan0.xml	0	0
19/07/2016 15:44	AMAR379.9.20160719T154450Z.wav_chan0.xml	0	0
19/07/2016 15:59	AMAR379.9.20160719T155917Z.wav_chan0.xml	0	0
19/07/2016 16:13	AMAR379.9.20160719T161344Z.wav_chan0.xml	0	0
19/07/2016 16:28	AMAR379.9.20160719T162811Z.wav_chan0.xml	0	0
19/07/2016 16:42	AMAR379.9.20160719T164238Z.wav_chan0.xml	0	0
19/07/2016 16:57	AMAR379.9.20160719T165705Z.wav_chan0.xml	0	0
19/07/2016 17:11	AMAR379.9.20160719T171132Z.wav_chan0.xml	0	0
19/07/2016 17:25	AMAR379.9.20160719T172559Z.wav_chan0.xml	0	0
19/07/2016 17:40	AMAR379.9.20160719T174026Z.wav_chan0.xml	0	0
19/07/2016 17:54	AMAR379.9.20160719T175453Z.wav_chan0.xml	0	0
19/07/2016 18:09	AMAR379.9.20160719T180920Z.wav_chan0.xml	0	0
19/07/2016 18:23	AMAR379.9.20160719T182347Z.wav_chan0.xml	0	0
19/07/2016 18:38	AMAR379.9.20160719T183814Z.wav_chan0.xml	0	0
19/07/2016 18:52	AMAR379.9.20160719T185241Z.wav_chan0.xml	0	0
19/07/2016 19:07	AMAR379.9.20160719T190708Z.wav_chan0.xml	0	0
19/07/2016 19:21	AMAR379.9.20160719T192135Z.wav_chan0.xml	0	0
19/07/2016 19:36	AMAR379.9.20160719T193602Z.wav_chan0.xml	0	0
19/07/2016 19:50	AMAR379.9.20160719T195029Z.wav_chan0.xml	0	0
19/07/2016 20:04	AMAR379.9.20160719T200456Z.wav_chan0.xml	0	0
19/07/2016 20:19	AMAR379.9.20160719T201923Z.wav_chan0.xml	0	0
19/07/2016 20:33	AMAR379.9.20160719T203350Z.wav_chan0.xml	0	0
19/07/2016 20:48	AMAR379.9.20160719T204817Z.wav_chan0.xml	0	0
19/07/2016 21:02	AMAR379.9.20160719T210244Z.wav_chan0.xml	0	0
19/07/2016 21:17	AMAR379.9.20160719T211711Z.wav_chan0.xml	0	0
19/07/2016 21:31	AMAR379.9.20160719T213138Z.wav_chan0.xml	0	0
19/07/2016 21:46	AMAR379.9.20160719T214605Z.wav_chan0.xml	0	0
19/07/2016 22:00	AMAR379.9.20160719T220032Z.wav_chan0.xml	0	0
19/07/2016 22:14	AMAR379.9.20160719T221459Z.wav_chan0.xml	0	0
19/07/2016 22:29	AMAR379.9.20160719T222926Z.wav_chan0.xml	0	0
19/07/2016 22:43	AMAR379.9.20160719T224353Z.wav_chan0.xml	0	0
19/07/2016 22:58	AMAR379.9.20160719T225820Z.wav_chan0.xml	0	0
19/07/2016 23:12	AMAR379.9.20160719T231247Z.wav_chan0.xml	0	0
19/07/2016 23:27	AMAR379.9.20160719T232714Z.wav_chan0.xml	0	0
19/07/2016 23:41	AMAR379.9.20160719T234141Z.wav_chan0.xml	0	0
19/07/2016 23:56	AMAR379.9.20160719T235608Z.wav_chan0.xml	0	0
20/07/2016 0:10	AMAR379.9.20160720T001035Z.wav_chan0.xml	0	0
20/07/2016 0:25	AMAR379.9.20160720T002502Z.wav_chan0.xml	0	0
20/07/2016 0:39	AMAR379.9.20160720T003929Z.wav_chan0.xml	0	0
20/07/2016 0:53	AMAR379.9.20160720T005356Z.wav_chan0.xml	0	0
20/07/2016 1:08	AMAR379.9.20160720T010823Z.wav_chan0.xml	0	0
20/07/2016 1:22	AMAR379.9.20160720T012250Z.wav_chan0.xml	0	0
20/07/2016 1:37	AMAR379.9.20160720T013717Z.wav_chan0.xml	0	0
20/07/2016 1:51	AMAR379.9.20160720T015144Z.wav_chan0.xml	0	0
20/07/2016 2:06	AMAR379.9.20160720T020611Z.wav_chan0.xml	2	0
20/07/2016 2:20	AMAR379.9.20160720T022038Z.wav_chan0.xml	6	0
20/07/2016 2:35	AMAR379.9.20160720T023505Z.wav_chan0.xml	0	0
20/07/2016 2:49	AMAR379.9.20160720T024932Z.wav_chan0.xml	0	0
20/07/2016 3:03	AMAR379.9.20160720T030359Z.wav_chan0.xml	0	0
20/07/2016 3:18	AMAR379.9.20160720T031826Z.wav_chan0.xml	0	0
20/07/2016 3:32	AMAR379.9.20160720T033253Z.wav_chan0.xml	0	0
20/07/2016 3:47	AMAR379.9.20160720T034720Z.wav_chan0.xml	0	0
20/07/2016 4:01	AMAR379.9.20160720T040147Z.wav_chan0.xml	0	0
20/07/2016 4:16	AMAR379.9.20160720T041614Z.wav_chan0.xml	0	0
20/07/2016 4:30	AMAR379.9.20160720T043041Z.wav_chan0.xml	0	0
20/07/2016 4:45	AMAR379.9.20160720T044508Z.wav_chan0.xml	0	0
20/07/2016 4:59	AMAR379.9.20160720T045935Z.wav_chan0.xml	0	0
20/07/2016 5:14	AMAR379.9.20160720T051402Z.wav_chan0.xml	0	0
20/07/2016 5:28	AMAR379.9.20160720T052829Z.wav_chan0.xml	0	0
20/07/2016 5:42	AMAR379.9.20160720T054256Z.wav_chan0.xml	0	0
20/07/2016 5:57	AMAR379.9.20160720T055723Z.wav_chan0.xml	0	0
20/07/2016 6:11	AMAR379.9.20160720T061150Z.wav_chan0.xml	0	0
20/07/2016 6:26	AMAR379.9.20160720T062617Z.wav_chan0.xml	0	0
20/07/2016 6:40	AMAR379.9.20160720T064044Z.wav_chan0.xml	0	0
20/07/2016 6:55	AMAR379.9.20160720T065511Z.wav_chan0.xml	0	0
20/07/2016 7:09	AMAR379.9.20160720T070938Z.wav_chan0.xml	4	0
20/07/2016 7:24	AMAR379.9.20160720T072405Z.wav_chan0.xml	4	0
20/07/2016 7:38	AMAR379.9.20160720T073832Z.wav_chan0.xml	0	0
20/07/2016 7:52	AMAR379.9.20160720T075259Z.wav_chan0.xml	1	0
20/07/2016 8:07	AMAR379.9.20160720T080726Z.wav_chan0.xml	1	0
20/07/2016 8:21	AMAR379.9.20160720T082153Z.wav_chan0.xml	0	0
20/07/2016 8:36	AMAR379.9.20160720T083620Z.wav_chan0.xml	0	0
20/07/2016 8:50	AMAR379.9.20160720T085047Z.wav_chan0.xml	0	0
20/07/2016 9:05	AMAR379.9.20160720T090514Z.wav_chan0.xml	0	0
20/07/2016 9:19	AMAR379.9.20160720T091941Z.wav_chan0.xml	0	0
20/07/2016 9:34	AMAR379.9.20160720T093408Z.wav_chan0.xml	0	0
20/07/2016 9:48	AMAR379.9.20160720T094835Z.wav_chan0.xml	0	0
20/07/2016 10:03	AMAR379.9.20160720T100302Z.wav_chan0.xml	1	0
20/07/2016 10:17	AMAR379.9.20160720T101729Z.wav_chan0.xml	0	0
20/07/2016 10:31	AMAR379.9.20160720T103156Z.wav_chan0.xml	0	0
20/07/2016 10:46	AMAR379.9.20160720T104623Z.wav_chan0.xml	0	0
20/07/2016 11:00	AMAR379.9.20160720T110050Z.wav_chan0.xml	0	0
20/07/2016 11:15	AMAR379.9.20160720T111517Z.wav_chan0.xml	0	0
20/07/2016 11:29	AMAR379.9.20160720T112944Z.wav_chan0.xml	0	0
20/07/2016 11:44	AMAR379.9.20160720T114411Z.wav_chan0.xml	0	0
20/07/2016 11:58	AMAR379.9.20160720T115838Z.wav_chan0.xml	0	0
20/07/2016 12:13	AMAR379.9.20160720T121305Z.wav_chan0.xml	0	0
20/07/2016 12:27	AMAR379.9.20160720T122732Z.wav_chan0.xml	0	0
20/07/2016 12:41	AMAR379.9.20160720T124159Z.wav_chan0.xml	0	0
20/07/2016 12:56	AMAR379.9.20160720T125626Z.wav_chan0.xml	0	0
20/07/2016 13:10	AMAR379.9.20160720T131053Z.wav_chan0.xml	0	0
20/07/2016 13:25	AMAR379.9.20160720T132520Z.wav_chan0.xml	0	0
20/07/2016 13:39	AMAR379.9.20160720T133947Z.wav_chan0.xml	0	0
20/07/2016 13:54	AMAR379.9.20160720T135414Z.wav_chan0.xml	0	0
20/07/2016 14:08	AMAR379.9.20160720T140841Z.wav_chan0.xml	0	0
20/07/2016 14:23	AMAR379.9.20160720T142308Z.wav_chan0.xml	0	0
20/07/2016 14:37	AMAR379.9.20160720T143735Z.wav_chan0.xml	0	0
20/07/2016 14:52	AMAR379.9.20160720T145202Z.wav_chan0.xml	0	0
20/07/2016 15:06	AMAR379.9.20160720T150629Z.wav_chan0.xml	4	0
20/07/2016 15:20	AMAR379.9.20160720T152056Z.wav_chan0.xml	10	1
20/07/2016 15:35	AMAR379.9.20160720T153523Z.wav_chan0.xml	6	0
20/07/2016 15:49	AMAR379.9.20160720T154950Z.wav_chan0.xml	0	0
20/07/2016 16:04	AMAR379.9.20160720T160417Z.wav_chan0.xml	0	0
20/07/2016 16:18	AMAR379.9.20160720T161844Z.wav_chan0.xml	0	0
20/07/2016 16:33	AMAR379.9.20160720T163311Z.wav_chan0.xml	0	0
20/07/2016 16:47	AMAR379.9.20160720T164738Z.wav_chan0.xml	0	0
20/07/2016 17:02	AMAR379.9.20160720T170205Z.wav_chan0.xml	0	0
20/07/2016 17:16	AMAR379.9.20160720T171632Z.wav_chan0.xml	0	0
20/07/2016 17:30	AMAR379.9.20160720T173059Z.wav_chan0.xml	1	0
20/07/2016 17:45	AMAR379.9.20160720T174526Z.wav_chan0.xml	0	0
20/07/2016 17:59	AMAR379.9.20160720T175953Z.wav_chan0.xml	0	0
20/07/2016 18:14	AMAR379.9.20160720T181420Z.wav_chan0.xml	0	0
20/07/2016 18:28	AMAR379.9.20160720T182847Z.wav_chan0.xml	0	0
20/07/2016 18:43	AMAR379.9.20160720T184314Z.wav_chan0.xml	0	0
20/07/2016 18:57	AMAR379.9.20160720T185741Z.wav_chan0.xml	0	0
20/07/2016 19:12	AMAR379.9.20160720T191208Z.wav_chan0.xml	0	0
20/07/2016 19:26	AMAR379.9.20160720T192635Z.wav_chan0.xml	0	0
20/07/2016 19:41	AMAR379.9.20160720T194102Z.wav_chan0.xml	0	0
20/07/2016 19:55	AMAR379.9.20160720T195529Z.wav_chan0.xml	0	0
20/07/2016 20:09	AMAR379.9.20160720T200956Z.wav_chan0.xml	0	0
20/07/2016 20:24	AMAR379.9.20160720T202423Z.wav_chan0.xml	0	0
20/07/2016 20:38	AMAR379.9.20160720T203850Z.wav_chan0.xml	0	0
20/07/2016 20:53	AMAR379.9.20160720T205317Z.wav_chan0.xml	0	0
20/07/2016 21:07	AMAR379.9.20160720T210744Z.wav_chan0.xml	0	0
20/07/2016 21:22	AMAR379.9.20160720T212211Z.wav_chan0.xml	0	0
20/07/2016 21:36	AMAR379.9.20160720T213638Z.wav_chan0.xml	0	0
20/07/2016 21:51	AMAR379.9.20160720T215105Z.wav_chan0.xml	0	0
20/07/2016 22:05	AMAR379.9.20160720T220532Z.wav_chan0.xml	0	0
20/07/2016 22:19	AMAR379.9.20160720T221959Z.wav_chan0.xml	0	0
20/07/2016 22:34	AMAR379.9.20160720T223426Z.wav_chan0.xml	0	0
20/07/2016 22:48	AMAR379.9.20160720T224853Z.wav_chan0.xml	3	0
20/07/2016 23:03	AMAR379.9.20160720T230320Z.wav_chan0.xml	0	0
20/07/2016 23:17	AMAR379.9.20160720T231747Z.wav_chan0.xml	1	0
20/07/2016 23:32	AMAR379.9.20160720T233214Z.wav_chan0.xml	0	0
20/07/2016 23:46	AMAR379.9.20160720T234641Z.wav_chan0.xml	0	0
21/07/2016 0:01	AMAR379.9.20160721T000108Z.wav_chan0.xml	2	0
21/07/2016 0:15	AMAR379.9.20160721T001535Z.wav_chan0.xml	0	0
21/07/2016 0:30	AMAR379.9.20160721T003002Z.wav_chan0.xml	0	0
21/07/2016 0:44	AMAR379.9.20160721T004429Z.wav_chan0.xml	0	0
21/07/2016 0:58	AMAR379.9.20160721T005856Z.wav_chan0.xml	0	0
21/07/2016 1:13	AMAR379.9.20160721T011323Z.wav_chan0.xml	0	0
21/07/2016 1:27	AMAR379.9.20160721T012750Z.wav_chan0.xml	0	0
21/07/2016 1:42	AMAR379.9.20160721T014217Z.wav_chan0.xml	0	0
21/07/2016 1:56	AMAR379.9.20160721T015644Z.wav_chan0.xml	0	0
21/07/2016 2:11	AMAR379.9.20160721T021111Z.wav_chan0.xml	0	0
21/07/2016 2:25	AMAR379.9.20160721T022538Z.wav_chan0.xml	0	0
21/07/2016 2:40	AMAR379.9.20160721T024005Z.wav_chan0.xml	0	0
21/07/2016 2:54	AMAR379.9.20160721T025432Z.wav_chan0.xml	0	0
21/07/2016 3:08	AMAR379.9.20160721T030859Z.wav_chan0.xml	0	0
21/07/2016 3:23	AMAR379.9.20160721T032326Z.wav_chan0.xml	0	0
21/07/2016 3:37	AMAR379.9.20160721T033753Z.wav_chan0.xml	0	1
21/07/2016 3:52	AMAR379.9.20160721T035220Z.wav_chan0.xml	0	0
21/07/2016 4:06	AMAR379.9.20160721T040647Z.wav_chan0.xml	0	0
21/07/2016 4:21	AMAR379.9.20160721T042114Z.wav_chan0.xml	0	0
21/07/2016 4:35	AMAR379.9.20160721T043541Z.wav_chan0.xml	0	0
21/07/2016 4:50	AMAR379.9.20160721T045008Z.wav_chan0.xml	0	0
21/07/2016 5:04	AMAR379.9.20160721T050435Z.wav_chan0.xml	0	0
21/07/2016 5:19	AMAR379.9.20160721T051902Z.wav_chan0.xml	0	0
21/07/2016 5:33	AMAR379.9.20160721T053329Z.wav_chan0.xml	0	0
21/07/2016 5:47	AMAR379.9.20160721T054756Z.wav_chan0.xml	0	0
21/07/2016 6:02	AMAR379.9.20160721T060223Z.wav_chan0.xml	0	0
21/07/2016 6:16	AMAR379.9.20160721T061650Z.wav_chan0.xml	0	0
21/07/2016 6:31	AMAR379.9.20160721T063117Z.wav_chan0.xml	0	0
21/07/2016 6:45	AMAR379.9.20160721T064544Z.wav_chan0.xml	0	0
21/07/2016 7:00	AMAR379.9.20160721T070011Z.wav_chan0.xml	0	0
21/07/2016 7:14	AMAR379.9.20160721T071438Z.wav_chan0.xml	5	0
21/07/2016 7:29	AMAR379.9.20160721T072905Z.wav_chan0.xml	0	0
21/07/2016 7:43	AMAR379.9.20160721T074332Z.wav_chan0.xml	0	0
21/07/2016 7:57	AMAR379.9.20160721T075759Z.wav_chan0.xml	0	0
21/07/2016 8:12	AMAR379.9.20160721T081226Z.wav_chan0.xml	0	0
21/07/2016 8:26	AMAR379.9.20160721T082653Z.wav_chan0.xml	0	0
21/07/2016 8:41	AMAR379.9.20160721T084120Z.wav_chan0.xml	0	0
21/07/2016 8:55	AMAR379.9.20160721T085547Z.wav_chan0.xml	0	0
21/07/2016 9:10	AMAR379.9.20160721T091014Z.wav_chan0.xml	0	0
21/07/2016 9:24	AMAR379.9.20160721T092441Z.wav_chan0.xml	0	0
21/07/2016 9:39	AMAR379.9.20160721T093908Z.wav_chan0.xml	0	0
21/07/2016 9:53	AMAR379.9.20160721T095335Z.wav_chan0.xml	0	0
21/07/2016 10:08	AMAR379.9.20160721T100802Z.wav_chan0.xml	0	0
21/07/2016 10:22	AMAR379.9.20160721T102229Z.wav_chan0.xml	0	0
21/07/2016 10:36	AMAR379.9.20160721T103656Z.wav_chan0.xml	0	0
21/07/2016 10:51	AMAR379.9.20160721T105123Z.wav_chan0.xml	0	0
21/07/2016 11:05	AMAR379.9.20160721T110550Z.wav_chan0.xml	0	0
21/07/2016 11:20	AMAR379.9.20160721T112017Z.wav_chan0.xml	0	0
21/07/2016 11:34	AMAR379.9.20160721T113444Z.wav_chan0.xml	0	0
21/07/2016 11:49	AMAR379.9.20160721T114911Z.wav_chan0.xml	0	0
21/07/2016 12:03	AMAR379.9.20160721T120338Z.wav_chan0.xml	0	0
21/07/2016 12:18	AMAR379.9.20160721T121805Z.wav_chan0.xml	0	0
21/07/2016 12:32	AMAR379.9.20160721T123232Z.wav_chan0.xml	2	0
21/07/2016 12:46	AMAR379.9.20160721T124659Z.wav_chan0.xml	0	0
21/07/2016 13:01	AMAR379.9.20160721T130126Z.wav_chan0.xml	0	0
21/07/2016 13:15	AMAR379.9.20160721T131553Z.wav_chan0.xml	0	0
21/07/2016 13:30	AMAR379.9.20160721T133020Z.wav_chan0.xml	0	0
21/07/2016 13:44	AMAR379.9.20160721T134447Z.wav_chan0.xml	0	0
21/07/2016 13:59	AMAR379.9.20160721T135914Z.wav_chan0.xml	0	0
21/07/2016 14:13	AMAR379.9.20160721T141341Z.wav_chan0.xml	0	0
21/07/2016 14:28	AMAR379.9.20160721T142808Z.wav_chan0.xml	0	0
21/07/2016 14:42	AMAR379.9.20160721T144235Z.wav_chan0.xml	0	0
21/07/2016 14:57	AMAR379.9.20160721T145702Z.wav_chan0.xml	0	0
21/07/2016 15:11	AMAR379.9.20160721T151129Z.wav_chan0.xml	0	0
21/07/2016 15:25	AMAR379.9.20160721T152556Z.wav_chan0.xml	0	0
21/07/2016 15:40	AMAR379.9.20160721T154023Z.wav_chan0.xml	0	0
21/07/2016 15:54	AMAR379.9.20160721T155450Z.wav_chan0.xml	0	0
21/07/2016 16:09	AMAR379.9.20160721T160917Z.wav_chan0.xml	9	0
21/07/2016 16:23	AMAR379.9.20160721T162344Z.wav_chan0.xml	0	0
21/07/2016 16:38	AMAR379.9.20160721T163811Z.wav_chan0.xml	0	0
21/07/2016 16:52	AMAR379.9.20160721T165238Z.wav_chan0.xml	9	0
21/07/2016 17:07	AMAR379.9.20160721T170705Z.wav_chan0.xml	0	0
21/07/2016 17:21	AMAR379.9.20160721T172132Z.wav_chan0.xml	0	0
21/07/2016 17:35	AMAR379.9.20160721T173559Z.wav_chan0.xml	0	0
21/07/2016 17:50	AMAR379.9.20160721T175026Z.wav_chan0.xml	0	0
21/07/2016 18:04	AMAR379.9.20160721T180453Z.wav_chan0.xml	0	0
21/07/2016 18:19	AMAR379.9.20160721T181920Z.wav_chan0.xml	0	0
21/07/2016 18:33	AMAR379.9.20160721T183347Z.wav_chan0.xml	0	0
21/07/2016 18:48	AMAR379.9.20160721T184814Z.wav_chan0.xml	0	0
21/07/2016 19:02	AMAR379.9.20160721T190241Z.wav_chan0.xml	0	0
21/07/2016 19:17	AMAR379.9.20160721T191708Z.wav_chan0.xml	0	0
21/07/2016 19:31	AMAR379.9.20160721T193135Z.wav_chan0.xml	0	0
21/07/2016 19:46	AMAR379.9.20160721T194602Z.wav_chan0.xml	0	0
21/07/2016 20:00	AMAR379.9.20160721T200029Z.wav_chan0.xml	0	0
21/07/2016 20:14	AMAR379.9.20160721T201456Z.wav_chan0.xml	0	0
21/07/2016 20:29	AMAR379.9.20160721T202923Z.wav_chan0.xml	0	0
21/07/2016 20:43	AMAR379.9.20160721T204350Z.wav_chan0.xml	0	0
21/07/2016 20:58	AMAR379.9.20160721T205817Z.wav_chan0.xml	0	0
21/07/2016 21:12	AMAR379.9.20160721T211244Z.wav_chan0.xml	0	0
21/07/2016 21:27	AMAR379.9.20160721T212711Z.wav_chan0.xml	0	0
21/07/2016 21:41	AMAR379.9.20160721T214138Z.wav_chan0.xml	0	0
21/07/2016 21:56	AMAR379.9.20160721T215605Z.wav_chan0.xml	0	0
21/07/2016 22:10	AMAR379.9.20160721T221032Z.wav_chan0.xml	0	0
21/07/2016 22:24	AMAR379.9.20160721T222459Z.wav_chan0.xml	0	0
21/07/2016 22:39	AMAR379.9.20160721T223926Z.wav_chan0.xml	0	0
21/07/2016 22:53	AMAR379.9.20160721T225353Z.wav_chan0.xml	0	0
21/07/2016 23:08	AMAR379.9.20160721T230820Z.wav_chan0.xml	0	0
21/07/2016 23:22	AMAR379.9.20160721T232247Z.wav_chan0.xml	0	0
21/07/2016 23:37	AMAR379.9.20160721T233714Z.wav_chan0.xml	0	0
21/07/2016 23:51	AMAR379.9.20160721T235141Z.wav_chan0.xml	0	0
22/07/2016 0:06	AMAR379.9.20160722T000608Z.wav_chan0.xml	0	0
22/07/2016 0:20	AMAR379.9.20160722T002035Z.wav_chan0.xml	0	0
22/07/2016 0:35	AMAR379.9.20160722T003502Z.wav_chan0.xml	0	0
22/07/2016 0:49	AMAR379.9.20160722T004929Z.wav_chan0.xml	0	0
22/07/2016 1:03	AMAR379.9.20160722T010356Z.wav_chan0.xml	0	0
22/07/2016 1:18	AMAR379.9.20160722T011823Z.wav_chan0.xml	4	0
22/07/2016 1:32	AMAR379.9.20160722T013250Z.wav_chan0.xml	0	0
22/07/2016 1:47	AMAR379.9.20160722T014717Z.wav_chan0.xml	0	0
22/07/2016 2:01	AMAR379.9.20160722T020144Z.wav_chan0.xml	0	0
22/07/2016 2:16	AMAR379.9.20160722T021611Z.wav_chan0.xml	0	0
22/07/2016 2:30	AMAR379.9.20160722T023038Z.wav_chan0.xml	0	0
22/07/2016 2:45	AMAR379.9.20160722T024505Z.wav_chan0.xml	0	0
22/07/2016 2:59	AMAR379.9.20160722T025932Z.wav_chan0.xml	0	0
22/07/2016 3:13	AMAR379.9.20160722T031359Z.wav_chan0.xml	0	0
22/07/2016 3:28	AMAR379.9.20160722T032826Z.wav_chan0.xml	0	0
22/07/2016 3:42	AMAR379.9.20160722T034253Z.wav_chan0.xml	0	0
22/07/2016 3:57	AMAR379.9.20160722T035720Z.wav_chan0.xml	1	0
22/07/2016 4:11	AMAR379.9.20160722T041147Z.wav_chan0.xml	1	0
22/07/2016 4:26	AMAR379.9.20160722T042614Z.wav_chan0.xml	0	0
22/07/2016 4:40	AMAR379.9.20160722T044041Z.wav_chan0.xml	0	0
22/07/2016 4:55	AMAR379.9.20160722T045508Z.wav_chan0.xml	0	0
22/07/2016 5:09	AMAR379.9.20160722T050935Z.wav_chan0.xml	0	0
22/07/2016 5:24	AMAR379.9.20160722T052402Z.wav_chan0.xml	0	0
22/07/2016 5:38	AMAR379.9.20160722T053829Z.wav_chan0.xml	0	0
22/07/2016 5:52	AMAR379.9.20160722T055256Z.wav_chan0.xml	0	0
22/07/2016 6:07	AMAR379.9.20160722T060723Z.wav_chan0.xml	0	0
22/07/2016 6:21	AMAR379.9.20160722T062150Z.wav_chan0.xml	0	0
22/07/2016 6:36	AMAR379.9.20160722T063617Z.wav_chan0.xml	0	0
22/07/2016 6:50	AMAR379.9.20160722T065044Z.wav_chan0.xml	0	0
22/07/2016 7:05	AMAR379.9.20160722T070511Z.wav_chan0.xml	0	0
22/07/2016 7:19	AMAR379.9.20160722T071938Z.wav_chan0.xml	0	0
22/07/2016 7:34	AMAR379.9.20160722T073405Z.wav_chan0.xml	2	0
22/07/2016 7:48	AMAR379.9.20160722T074832Z.wav_chan0.xml	0	0
22/07/2016 8:02	AMAR379.9.20160722T080259Z.wav_chan0.xml	0	0
22/07/2016 8:17	AMAR379.9.20160722T081726Z.wav_chan0.xml	0	0
22/07/2016 8:31	AMAR379.9.20160722T083153Z.wav_chan0.xml	0	0
22/07/2016 8:46	AMAR379.9.20160722T084620Z.wav_chan0.xml	0	0
22/07/2016 9:00	AMAR379.9.20160722T090047Z.wav_chan0.xml	0	0
22/07/2016 9:15	AMAR379.9.20160722T091514Z.wav_chan0.xml	0	0
22/07/2016 9:29	AMAR379.9.20160722T092941Z.wav_chan0.xml	0	0
22/07/2016 9:44	AMAR379.9.20160722T094408Z.wav_chan0.xml	0	0
22/07/2016 9:58	AMAR379.9.20160722T095835Z.wav_chan0.xml	0	0
22/07/2016 10:13	AMAR379.9.20160722T101302Z.wav_chan0.xml	0	0
22/07/2016 10:27	AMAR379.9.20160722T102729Z.wav_chan0.xml	0	0
22/07/2016 10:41	AMAR379.9.20160722T104156Z.wav_chan0.xml	0	0
22/07/2016 10:56	AMAR379.9.20160722T105623Z.wav_chan0.xml	12	0
22/07/2016 11:10	AMAR379.9.20160722T111050Z.wav_chan0.xml	18	0
22/07/2016 11:25	AMAR379.9.20160722T112517Z.wav_chan0.xml	8	0
22/07/2016 11:39	AMAR379.9.20160722T113944Z.wav_chan0.xml	0	0
22/07/2016 11:54	AMAR379.9.20160722T115411Z.wav_chan0.xml	0	0
22/07/2016 12:08	AMAR379.9.20160722T120838Z.wav_chan0.xml	0	0
22/07/2016 12:23	AMAR379.9.20160722T122305Z.wav_chan0.xml	0	0
22/07/2016 12:37	AMAR379.9.20160722T123732Z.wav_chan0.xml	0	0
22/07/2016 12:51	AMAR379.9.20160722T125159Z.wav_chan0.xml	0	0
22/07/2016 13:06	AMAR379.9.20160722T130626Z.wav_chan0.xml	0	0
22/07/2016 13:20	AMAR379.9.20160722T132053Z.wav_chan0.xml	0	0
22/07/2016 13:35	AMAR379.9.20160722T133520Z.wav_chan0.xml	0	0
22/07/2016 13:49	AMAR379.9.20160722T134947Z.wav_chan0.xml	0	0
22/07/2016 14:04	AMAR379.9.20160722T140414Z.wav_chan0.xml	0	0
22/07/2016 14:18	AMAR379.9.20160722T141841Z.wav_chan0.xml	0	0
22/07/2016 14:33	AMAR379.9.20160722T143308Z.wav_chan0.xml	0	0
22/07/2016 14:47	AMAR379.9.20160722T144735Z.wav_chan0.xml	0	0
22/07/2016 15:02	AMAR379.9.20160722T150202Z.wav_chan0.xml	0	0
22/07/2016 15:16	AMAR379.9.20160722T151629Z.wav_chan0.xml	0	0
22/07/2016 15:30	AMAR379.9.20160722T153056Z.wav_chan0.xml	0	0
22/07/2016 15:45	AMAR379.9.20160722T154523Z.wav_chan0.xml	0	0
22/07/2016 15:59	AMAR379.9.20160722T155950Z.wav_chan0.xml	0	0
22/07/2016 16:14	AMAR379.9.20160722T161417Z.wav_chan0.xml	0	0
22/07/2016 16:28	AMAR379.9.20160722T162844Z.wav_chan0.xml	0	0
22/07/2016 16:43	AMAR379.9.20160722T164311Z.wav_chan0.xml	0	0
22/07/2016 16:57	AMAR379.9.20160722T165738Z.wav_chan0.xml	0	0
22/07/2016 17:12	AMAR379.9.20160722T171205Z.wav_chan0.xml	0	0
22/07/2016 17:26	AMAR379.9.20160722T172632Z.wav_chan0.xml	0	0
22/07/2016 17:40	AMAR379.9.20160722T174059Z.wav_chan0.xml	0	0
22/07/2016 17:55	AMAR379.9.20160722T175526Z.wav_chan0.xml	0	0
22/07/2016 18:09	AMAR379.9.20160722T180953Z.wav_chan0.xml	0	0
22/07/2016 18:24	AMAR379.9.20160722T182420Z.wav_chan0.xml	0	0
22/07/2016 18:38	AMAR379.9.20160722T183847Z.wav_chan0.xml	0	0
22/07/2016 18:53	AMAR379.9.20160722T185314Z.wav_chan0.xml	0	0
22/07/2016 19:07	AMAR379.9.20160722T190741Z.wav_chan0.xml	2	0
22/07/2016 19:22	AMAR379.9.20160722T192208Z.wav_chan0.xml	0	0
22/07/2016 19:36	AMAR379.9.20160722T193635Z.wav_chan0.xml	0	0
22/07/2016 19:51	AMAR379.9.20160722T195102Z.wav_chan0.xml	0	0
22/07/2016 20:05	AMAR379.9.20160722T200529Z.wav_chan0.xml	0	0
22/07/2016 20:19	AMAR379.9.20160722T201956Z.wav_chan0.xml	0	0
22/07/2016 20:34	AMAR379.9.20160722T203423Z.wav_chan0.xml	0	0
22/07/2016 20:48	AMAR379.9.20160722T204850Z.wav_chan0.xml	0	0
22/07/2016 21:03	AMAR379.9.20160722T210317Z.wav_chan0.xml	0	0
22/07/2016 21:17	AMAR379.9.20160722T211744Z.wav_chan0.xml	0	0
22/07/2016 21:32	AMAR379.9.20160722T213211Z.wav_chan0.xml	0	0
22/07/2016 21:46	AMAR379.9.20160722T214638Z.wav_chan0.xml	2	0
22/07/2016 22:01	AMAR379.9.20160722T220105Z.wav_chan0.xml	0	0
22/07/2016 22:15	AMAR379.9.20160722T221532Z.wav_chan0.xml	0	0
22/07/2016 22:29	AMAR379.9.20160722T222959Z.wav_chan0.xml	0	0
22/07/2016 22:44	AMAR379.9.20160722T224426Z.wav_chan0.xml	0	0
22/07/2016 22:58	AMAR379.9.20160722T225853Z.wav_chan0.xml	0	0
22/07/2016 23:13	AMAR379.9.20160722T231320Z.wav_chan0.xml	0	0
22/07/2016 23:27	AMAR379.9.20160722T232747Z.wav_chan0.xml	0	0
22/07/2016 23:42	AMAR379.9.20160722T234214Z.wav_chan0.xml	0	0
22/07/2016 23:56	AMAR379.9.20160722T235641Z.wav_chan0.xml	0	0
23/07/2016 0:11	AMAR379.9.20160723T001108Z.wav_chan0.xml	0	0
23/07/2016 0:25	AMAR379.9.20160723T002535Z.wav_chan0.xml	0	0
23/07/2016 0:40	AMAR379.9.20160723T004002Z.wav_chan0.xml	0	0
23/07/2016 0:54	AMAR379.9.20160723T005429Z.wav_chan0.xml	0	0
23/07/2016 1:08	AMAR379.9.20160723T010856Z.wav_chan0.xml	0	0
23/07/2016 1:23	AMAR379.9.20160723T012323Z.wav_chan0.xml	0	0
23/07/2016 1:37	AMAR379.9.20160723T013750Z.wav_chan0.xml	0	0
23/07/2016 1:52	AMAR379.9.20160723T015217Z.wav_chan0.xml	0	0
23/07/2016 2:06	AMAR379.9.20160723T020644Z.wav_chan0.xml	0	0
23/07/2016 2:21	AMAR379.9.20160723T022111Z.wav_chan0.xml	0	0
23/07/2016 2:35	AMAR379.9.20160723T023538Z.wav_chan0.xml	0	0
23/07/2016 2:50	AMAR379.9.20160723T025005Z.wav_chan0.xml	0	0
23/07/2016 3:04	AMAR379.9.20160723T030432Z.wav_chan0.xml	7	0
23/07/2016 3:18	AMAR379.9.20160723T031859Z.wav_chan0.xml	5	0
23/07/2016 3:33	AMAR379.9.20160723T033326Z.wav_chan0.xml	0	0
23/07/2016 3:47	AMAR379.9.20160723T034753Z.wav_chan0.xml	0	0
23/07/2016 4:02	AMAR379.9.20160723T040220Z.wav_chan0.xml	0	0
23/07/2016 4:16	AMAR379.9.20160723T041647Z.wav_chan0.xml	0	0
23/07/2016 4:31	AMAR379.9.20160723T043114Z.wav_chan0.xml	0	0
23/07/2016 4:45	AMAR379.9.20160723T044541Z.wav_chan0.xml	0	0
23/07/2016 5:00	AMAR379.9.20160723T050008Z.wav_chan0.xml	0	0
23/07/2016 5:14	AMAR379.9.20160723T051435Z.wav_chan0.xml	0	0
23/07/2016 5:29	AMAR379.9.20160723T052902Z.wav_chan0.xml	0	0
23/07/2016 5:43	AMAR379.9.20160723T054329Z.wav_chan0.xml	0	0
23/07/2016 5:57	AMAR379.9.20160723T055756Z.wav_chan0.xml	0	0
23/07/2016 6:12	AMAR379.9.20160723T061223Z.wav_chan0.xml	0	0
23/07/2016 6:26	AMAR379.9.20160723T062650Z.wav_chan0.xml	0	0
23/07/2016 6:41	AMAR379.9.20160723T064117Z.wav_chan0.xml	0	0
23/07/2016 6:55	AMAR379.9.20160723T065544Z.wav_chan0.xml	0	0
23/07/2016 7:10	AMAR379.9.20160723T071011Z.wav_chan0.xml	0	0
23/07/2016 7:24	AMAR379.9.20160723T072438Z.wav_chan0.xml	0	0
23/07/2016 7:39	AMAR379.9.20160723T073905Z.wav_chan0.xml	0	0
23/07/2016 7:53	AMAR379.9.20160723T075332Z.wav_chan0.xml	0	0
23/07/2016 8:07	AMAR379.9.20160723T080759Z.wav_chan0.xml	0	0
23/07/2016 8:22	AMAR379.9.20160723T082226Z.wav_chan0.xml	0	0
23/07/2016 8:36	AMAR379.9.20160723T083653Z.wav_chan0.xml	0	0
23/07/2016 8:51	AMAR379.9.20160723T085120Z.wav_chan0.xml	0	0
23/07/2016 9:05	AMAR379.9.20160723T090547Z.wav_chan0.xml	0	0
23/07/2016 9:20	AMAR379.9.20160723T092014Z.wav_chan0.xml	0	0
23/07/2016 9:34	AMAR379.9.20160723T093441Z.wav_chan0.xml	0	0
23/07/2016 9:49	AMAR379.9.20160723T094908Z.wav_chan0.xml	0	0
23/07/2016 10:03	AMAR379.9.20160723T100335Z.wav_chan0.xml	0	0
23/07/2016 10:18	AMAR379.9.20160723T101802Z.wav_chan0.xml	0	0
23/07/2016 10:32	AMAR379.9.20160723T103229Z.wav_chan0.xml	0	0
23/07/2016 10:46	AMAR379.9.20160723T104656Z.wav_chan0.xml	0	0
23/07/2016 11:01	AMAR379.9.20160723T110123Z.wav_chan0.xml	0	0
23/07/2016 11:15	AMAR379.9.20160723T111550Z.wav_chan0.xml	0	0
23/07/2016 11:30	AMAR379.9.20160723T113017Z.wav_chan0.xml	0	0
23/07/2016 11:44	AMAR379.9.20160723T114444Z.wav_chan0.xml	0	0
23/07/2016 11:59	AMAR379.9.20160723T115911Z.wav_chan0.xml	0	0
23/07/2016 12:13	AMAR379.9.20160723T121338Z.wav_chan0.xml	0	0
23/07/2016 12:28	AMAR379.9.20160723T122805Z.wav_chan0.xml	0	0
23/07/2016 12:42	AMAR379.9.20160723T124232Z.wav_chan0.xml	1	0
23/07/2016 12:56	AMAR379.9.20160723T125659Z.wav_chan0.xml	3	0
23/07/2016 13:11	AMAR379.9.20160723T131126Z.wav_chan0.xml	9	1
23/07/2016 13:25	AMAR379.9.20160723T132553Z.wav_chan0.xml	0	0
23/07/2016 13:40	AMAR379.9.20160723T134020Z.wav_chan0.xml	0	0
23/07/2016 13:54	AMAR379.9.20160723T135447Z.wav_chan0.xml	1	0
23/07/2016 14:09	AMAR379.9.20160723T140914Z.wav_chan0.xml	0	0
23/07/2016 14:23	AMAR379.9.20160723T142341Z.wav_chan0.xml	0	0
23/07/2016 14:38	AMAR379.9.20160723T143808Z.wav_chan0.xml	0	0
23/07/2016 14:52	AMAR379.9.20160723T145235Z.wav_chan0.xml	0	0
23/07/2016 15:07	AMAR379.9.20160723T150702Z.wav_chan0.xml	0	0
23/07/2016 15:21	AMAR379.9.20160723T152129Z.wav_chan0.xml	0	0
23/07/2016 15:35	AMAR379.9.20160723T153556Z.wav_chan0.xml	0	0
23/07/2016 15:50	AMAR379.9.20160723T155023Z.wav_chan0.xml	0	0
23/07/2016 16:04	AMAR379.9.20160723T160450Z.wav_chan0.xml	0	0
23/07/2016 16:19	AMAR379.9.20160723T161917Z.wav_chan0.xml	0	0
23/07/2016 16:33	AMAR379.9.20160723T163344Z.wav_chan0.xml	0	0
23/07/2016 16:48	AMAR379.9.20160723T164811Z.wav_chan0.xml	0	0
23/07/2016 17:02	AMAR379.9.20160723T170238Z.wav_chan0.xml	0	0
23/07/2016 17:17	AMAR379.9.20160723T171705Z.wav_chan0.xml	0	0
23/07/2016 17:31	AMAR379.9.20160723T173132Z.wav_chan0.xml	0	0
23/07/2016 17:45	AMAR379.9.20160723T174559Z.wav_chan0.xml	0	0
23/07/2016 18:00	AMAR379.9.20160723T180026Z.wav_chan0.xml	0	0
23/07/2016 18:14	AMAR379.9.20160723T181453Z.wav_chan0.xml	0	0
23/07/2016 18:29	AMAR379.9.20160723T182920Z.wav_chan0.xml	0	0
23/07/2016 18:43	AMAR379.9.20160723T184347Z.wav_chan0.xml	4	0
23/07/2016 18:58	AMAR379.9.20160723T185814Z.wav_chan0.xml	3	0
23/07/2016 19:12	AMAR379.9.20160723T191241Z.wav_chan0.xml	0	0
23/07/2016 19:27	AMAR379.9.20160723T192708Z.wav_chan0.xml	0	0
23/07/2016 19:41	AMAR379.9.20160723T194135Z.wav_chan0.xml	0	0
23/07/2016 19:56	AMAR379.9.20160723T195602Z.wav_chan0.xml	0	0
23/07/2016 20:10	AMAR379.9.20160723T201029Z.wav_chan0.xml	0	0
23/07/2016 20:24	AMAR379.9.20160723T202456Z.wav_chan0.xml	2	0
23/07/2016 20:39	AMAR379.9.20160723T203923Z.wav_chan0.xml	0	0
23/07/2016 20:53	AMAR379.9.20160723T205350Z.wav_chan0.xml	0	0
23/07/2016 21:08	AMAR379.9.20160723T210817Z.wav_chan0.xml	0	0
23/07/2016 21:22	AMAR379.9.20160723T212244Z.wav_chan0.xml	0	0
23/07/2016 21:37	AMAR379.9.20160723T213711Z.wav_chan0.xml	0	0
23/07/2016 21:51	AMAR379.9.20160723T215138Z.wav_chan0.xml	0	0
23/07/2016 22:06	AMAR379.9.20160723T220605Z.wav_chan0.xml	0	0
23/07/2016 22:20	AMAR379.9.20160723T222032Z.wav_chan0.xml	0	0
23/07/2016 22:34	AMAR379.9.20160723T223459Z.wav_chan0.xml	0	0
23/07/2016 22:49	AMAR379.9.20160723T224926Z.wav_chan0.xml	0	0
23/07/2016 23:03	AMAR379.9.20160723T230353Z.wav_chan0.xml	0	0
23/07/2016 23:18	AMAR379.9.20160723T231820Z.wav_chan0.xml	0	0
23/07/2016 23:32	AMAR379.9.20160723T233247Z.wav_chan0.xml	0	0
23/07/2016 23:47	AMAR379.9.20160723T234714Z.wav_chan0.xml	0	0
24/07/2016 0:01	AMAR379.9.20160724T000141Z.wav_chan0.xml	0	0
24/07/2016 0:16	AMAR379.9.20160724T001608Z.wav_chan0.xml	0	0
24/07/2016 0:30	AMAR379.9.20160724T003035Z.wav_chan0.xml	0	0
24/07/2016 0:45	AMAR379.9.20160724T004502Z.wav_chan0.xml	0	0
24/07/2016 0:59	AMAR379.9.20160724T005929Z.wav_chan0.xml	0	0
24/07/2016 1:13	AMAR379.9.20160724T011356Z.wav_chan0.xml	0	0
24/07/2016 1:28	AMAR379.9.20160724T012823Z.wav_chan0.xml	0	0
24/07/2016 1:42	AMAR379.9.20160724T014250Z.wav_chan0.xml	0	0
24/07/2016 1:57	AMAR379.9.20160724T015717Z.wav_chan0.xml	0	0
24/07/2016 2:11	AMAR379.9.20160724T021144Z.wav_chan0.xml	0	0
24/07/2016 2:26	AMAR379.9.20160724T022611Z.wav_chan0.xml	0	0
24/07/2016 2:40	AMAR379.9.20160724T024038Z.wav_chan0.xml	0	0
24/07/2016 2:55	AMAR379.9.20160724T025505Z.wav_chan0.xml	0	0
24/07/2016 3:09	AMAR379.9.20160724T030932Z.wav_chan0.xml	0	0
24/07/2016 3:23	AMAR379.9.20160724T032359Z.wav_chan0.xml	0	0
24/07/2016 3:38	AMAR379.9.20160724T033826Z.wav_chan0.xml	0	0
24/07/2016 3:52	AMAR379.9.20160724T035253Z.wav_chan0.xml	0	0
24/07/2016 4:07	AMAR379.9.20160724T040720Z.wav_chan0.xml	0	0
24/07/2016 4:21	AMAR379.9.20160724T042147Z.wav_chan0.xml	0	0
24/07/2016 4:36	AMAR379.9.20160724T043614Z.wav_chan0.xml	0	0
24/07/2016 4:50	AMAR379.9.20160724T045041Z.wav_chan0.xml	0	0
24/07/2016 5:05	AMAR379.9.20160724T050508Z.wav_chan0.xml	0	0
24/07/2016 5:19	AMAR379.9.20160724T051935Z.wav_chan0.xml	0	0
24/07/2016 5:34	AMAR379.9.20160724T053402Z.wav_chan0.xml	0	0
24/07/2016 5:48	AMAR379.9.20160724T054829Z.wav_chan0.xml	0	0
24/07/2016 6:02	AMAR379.9.20160724T060256Z.wav_chan0.xml	0	0
24/07/2016 6:17	AMAR379.9.20160724T061723Z.wav_chan0.xml	0	0
24/07/2016 6:31	AMAR379.9.20160724T063150Z.wav_chan0.xml	0	0
24/07/2016 6:46	AMAR379.9.20160724T064617Z.wav_chan0.xml	0	0
24/07/2016 7:00	AMAR379.9.20160724T070044Z.wav_chan0.xml	0	0
24/07/2016 7:15	AMAR379.9.20160724T071511Z.wav_chan0.xml	0	0
24/07/2016 7:29	AMAR379.9.20160724T072938Z.wav_chan0.xml	0	0
24/07/2016 7:44	AMAR379.9.20160724T074405Z.wav_chan0.xml	0	0
24/07/2016 7:58	AMAR379.9.20160724T075832Z.wav_chan0.xml	0	0
24/07/2016 8:12	AMAR379.9.20160724T081259Z.wav_chan0.xml	0	0
24/07/2016 8:27	AMAR379.9.20160724T082726Z.wav_chan0.xml	0	0
24/07/2016 8:41	AMAR379.9.20160724T084153Z.wav_chan0.xml	0	0
24/07/2016 8:56	AMAR379.9.20160724T085620Z.wav_chan0.xml	0	0
24/07/2016 9:10	AMAR379.9.20160724T091047Z.wav_chan0.xml	0	0
24/07/2016 9:25	AMAR379.9.20160724T092514Z.wav_chan0.xml	0	0
24/07/2016 9:39	AMAR379.9.20160724T093941Z.wav_chan0.xml	0	0
24/07/2016 9:54	AMAR379.9.20160724T095408Z.wav_chan0.xml	0	0
24/07/2016 10:08	AMAR379.9.20160724T100835Z.wav_chan0.xml	0	0
24/07/2016 10:23	AMAR379.9.20160724T102302Z.wav_chan0.xml	0	0
24/07/2016 10:37	AMAR379.9.20160724T103729Z.wav_chan0.xml	0	0
24/07/2016 10:51	AMAR379.9.20160724T105156Z.wav_chan0.xml	0	0
24/07/2016 11:06	AMAR379.9.20160724T110623Z.wav_chan0.xml	0	0
24/07/2016 11:20	AMAR379.9.20160724T112050Z.wav_chan0.xml	0	0
24/07/2016 11:35	AMAR379.9.20160724T113517Z.wav_chan0.xml	0	0
24/07/2016 11:49	AMAR379.9.20160724T114944Z.wav_chan0.xml	0	0
24/07/2016 12:04	AMAR379.9.20160724T120411Z.wav_chan0.xml	0	0
24/07/2016 12:18	AMAR379.9.20160724T121838Z.wav_chan0.xml	0	0
24/07/2016 12:33	AMAR379.9.20160724T123305Z.wav_chan0.xml	0	0
24/07/2016 12:47	AMAR379.9.20160724T124732Z.wav_chan0.xml	0	0
24/07/2016 13:01	AMAR379.9.20160724T130159Z.wav_chan0.xml	0	0
24/07/2016 13:16	AMAR379.9.20160724T131626Z.wav_chan0.xml	0	0
24/07/2016 13:30	AMAR379.9.20160724T133053Z.wav_chan0.xml	0	0
24/07/2016 13:45	AMAR379.9.20160724T134520Z.wav_chan0.xml	0	0
24/07/2016 13:59	AMAR379.9.20160724T135947Z.wav_chan0.xml	0	0
24/07/2016 14:14	AMAR379.9.20160724T141414Z.wav_chan0.xml	0	0
24/07/2016 14:28	AMAR379.9.20160724T142841Z.wav_chan0.xml	0	0
24/07/2016 14:43	AMAR379.9.20160724T144308Z.wav_chan0.xml	0	0
24/07/2016 14:57	AMAR379.9.20160724T145735Z.wav_chan0.xml	0	0
24/07/2016 15:12	AMAR379.9.20160724T151202Z.wav_chan0.xml	0	0
24/07/2016 15:26	AMAR379.9.20160724T152629Z.wav_chan0.xml	0	0
24/07/2016 15:40	AMAR379.9.20160724T154056Z.wav_chan0.xml	0	0
24/07/2016 15:55	AMAR379.9.20160724T155523Z.wav_chan0.xml	0	0
24/07/2016 16:09	AMAR379.9.20160724T160950Z.wav_chan0.xml	0	0
24/07/2016 16:24	AMAR379.9.20160724T162417Z.wav_chan0.xml	0	0
24/07/2016 16:38	AMAR379.9.20160724T163844Z.wav_chan0.xml	0	0
24/07/2016 16:53	AMAR379.9.20160724T165311Z.wav_chan0.xml	0	0
24/07/2016 17:07	AMAR379.9.20160724T170738Z.wav_chan0.xml	0	0
24/07/2016 17:22	AMAR379.9.20160724T172205Z.wav_chan0.xml	0	0
24/07/2016 17:36	AMAR379.9.20160724T173632Z.wav_chan0.xml	0	0
24/07/2016 17:50	AMAR379.9.20160724T175059Z.wav_chan0.xml	0	0
24/07/2016 18:05	AMAR379.9.20160724T180526Z.wav_chan0.xml	0	0
24/07/2016 18:19	AMAR379.9.20160724T181953Z.wav_chan0.xml	0	0
24/07/2016 18:34	AMAR379.9.20160724T183420Z.wav_chan0.xml	0	0
24/07/2016 18:48	AMAR379.9.20160724T184847Z.wav_chan0.xml	0	0
24/07/2016 19:03	AMAR379.9.20160724T190314Z.wav_chan0.xml	0	0
24/07/2016 19:17	AMAR379.9.20160724T191741Z.wav_chan0.xml	0	0
24/07/2016 19:32	AMAR379.9.20160724T193208Z.wav_chan0.xml	0	1
24/07/2016 19:46	AMAR379.9.20160724T194635Z.wav_chan0.xml	0	0
24/07/2016 20:01	AMAR379.9.20160724T200102Z.wav_chan0.xml	0	0
24/07/2016 20:15	AMAR379.9.20160724T201529Z.wav_chan0.xml	0	0
24/07/2016 20:29	AMAR379.9.20160724T202956Z.wav_chan0.xml	0	0
24/07/2016 20:44	AMAR379.9.20160724T204423Z.wav_chan0.xml	0	0
24/07/2016 20:58	AMAR379.9.20160724T205850Z.wav_chan0.xml	0	0
24/07/2016 21:13	AMAR379.9.20160724T211317Z.wav_chan0.xml	0	0
24/07/2016 21:27	AMAR379.9.20160724T212744Z.wav_chan0.xml	0	0
24/07/2016 21:42	AMAR379.9.20160724T214211Z.wav_chan0.xml	0	0
24/07/2016 21:56	AMAR379.9.20160724T215638Z.wav_chan0.xml	0	0
24/07/2016 22:11	AMAR379.9.20160724T221105Z.wav_chan0.xml	0	0
24/07/2016 22:25	AMAR379.9.20160724T222532Z.wav_chan0.xml	0	0
24/07/2016 22:39	AMAR379.9.20160724T223959Z.wav_chan0.xml	1	0
24/07/2016 22:54	AMAR379.9.20160724T225426Z.wav_chan0.xml	2	0
24/07/2016 23:08	AMAR379.9.20160724T230853Z.wav_chan0.xml	0	0
24/07/2016 23:23	AMAR379.9.20160724T232320Z.wav_chan0.xml	0	0
24/07/2016 23:37	AMAR379.9.20160724T233747Z.wav_chan0.xml	0	0
24/07/2016 23:52	AMAR379.9.20160724T235214Z.wav_chan0.xml	0	0
25/07/2016 0:06	AMAR379.9.20160725T000641Z.wav_chan0.xml	0	0
25/07/2016 0:21	AMAR379.9.20160725T002108Z.wav_chan0.xml	0	0
25/07/2016 0:35	AMAR379.9.20160725T003535Z.wav_chan0.xml	0	0
25/07/2016 0:50	AMAR379.9.20160725T005002Z.wav_chan0.xml	0	0
25/07/2016 1:04	AMAR379.9.20160725T010429Z.wav_chan0.xml	0	0
25/07/2016 1:18	AMAR379.9.20160725T011856Z.wav_chan0.xml	0	0
25/07/2016 1:33	AMAR379.9.20160725T013323Z.wav_chan0.xml	0	0
25/07/2016 1:47	AMAR379.9.20160725T014750Z.wav_chan0.xml	2	0
25/07/2016 2:02	AMAR379.9.20160725T020217Z.wav_chan0.xml	0	0
25/07/2016 2:16	AMAR379.9.20160725T021644Z.wav_chan0.xml	0	0
25/07/2016 2:31	AMAR379.9.20160725T023111Z.wav_chan0.xml	0	0
25/07/2016 2:45	AMAR379.9.20160725T024538Z.wav_chan0.xml	0	0
25/07/2016 3:00	AMAR379.9.20160725T030005Z.wav_chan0.xml	0	0
25/07/2016 3:14	AMAR379.9.20160725T031432Z.wav_chan0.xml	0	0
25/07/2016 3:28	AMAR379.9.20160725T032859Z.wav_chan0.xml	0	0
25/07/2016 3:43	AMAR379.9.20160725T034326Z.wav_chan0.xml	0	0
25/07/2016 3:57	AMAR379.9.20160725T035753Z.wav_chan0.xml	0	0
25/07/2016 4:12	AMAR379.9.20160725T041220Z.wav_chan0.xml	0	0
25/07/2016 4:26	AMAR379.9.20160725T042647Z.wav_chan0.xml	0	0
25/07/2016 4:41	AMAR379.9.20160725T044114Z.wav_chan0.xml	0	0
25/07/2016 4:55	AMAR379.9.20160725T045541Z.wav_chan0.xml	0	0
25/07/2016 5:10	AMAR379.9.20160725T051008Z.wav_chan0.xml	0	0
25/07/2016 5:24	AMAR379.9.20160725T052435Z.wav_chan0.xml	0	0
25/07/2016 5:39	AMAR379.9.20160725T053902Z.wav_chan0.xml	0	0
25/07/2016 5:53	AMAR379.9.20160725T055329Z.wav_chan0.xml	0	0
25/07/2016 6:07	AMAR379.9.20160725T060756Z.wav_chan0.xml	3	0
25/07/2016 6:22	AMAR379.9.20160725T062223Z.wav_chan0.xml	17	0
25/07/2016 6:36	AMAR379.9.20160725T063650Z.wav_chan0.xml	0	0
25/07/2016 6:51	AMAR379.9.20160725T065117Z.wav_chan0.xml	0	0
25/07/2016 7:05	AMAR379.9.20160725T070544Z.wav_chan0.xml	0	0
25/07/2016 7:20	AMAR379.9.20160725T072011Z.wav_chan0.xml	0	0
25/07/2016 7:34	AMAR379.9.20160725T073438Z.wav_chan0.xml	0	0
25/07/2016 7:49	AMAR379.9.20160725T074905Z.wav_chan0.xml	0	0
25/07/2016 8:03	AMAR379.9.20160725T080332Z.wav_chan0.xml	0	0
25/07/2016 8:17	AMAR379.9.20160725T081759Z.wav_chan0.xml	0	0
25/07/2016 8:32	AMAR379.9.20160725T083226Z.wav_chan0.xml	0	0
25/07/2016 8:46	AMAR379.9.20160725T084653Z.wav_chan0.xml	0	0
25/07/2016 9:01	AMAR379.9.20160725T090120Z.wav_chan0.xml	0	0
25/07/2016 9:15	AMAR379.9.20160725T091547Z.wav_chan0.xml	0	0
25/07/2016 9:30	AMAR379.9.20160725T093014Z.wav_chan0.xml	0	0
25/07/2016 9:44	AMAR379.9.20160725T094441Z.wav_chan0.xml	0	0
25/07/2016 9:59	AMAR379.9.20160725T095908Z.wav_chan0.xml	0	0
25/07/2016 10:13	AMAR379.9.20160725T101335Z.wav_chan0.xml	0	0
25/07/2016 10:28	AMAR379.9.20160725T102802Z.wav_chan0.xml	0	0
25/07/2016 10:42	AMAR379.9.20160725T104229Z.wav_chan0.xml	0	0
25/07/2016 10:56	AMAR379.9.20160725T105656Z.wav_chan0.xml	0	0
25/07/2016 11:11	AMAR379.9.20160725T111123Z.wav_chan0.xml	0	0
25/07/2016 11:25	AMAR379.9.20160725T112550Z.wav_chan0.xml	0	0
25/07/2016 11:40	AMAR379.9.20160725T114017Z.wav_chan0.xml	0	0
25/07/2016 11:54	AMAR379.9.20160725T115444Z.wav_chan0.xml	0	0
25/07/2016 12:09	AMAR379.9.20160725T120911Z.wav_chan0.xml	0	0
25/07/2016 12:23	AMAR379.9.20160725T122338Z.wav_chan0.xml	0	0
25/07/2016 12:38	AMAR379.9.20160725T123805Z.wav_chan0.xml	0	0
25/07/2016 12:52	AMAR379.9.20160725T125232Z.wav_chan0.xml	0	0
25/07/2016 13:06	AMAR379.9.20160725T130659Z.wav_chan0.xml	0	0
25/07/2016 13:21	AMAR379.9.20160725T132126Z.wav_chan0.xml	0	0
25/07/2016 13:35	AMAR379.9.20160725T133553Z.wav_chan0.xml	0	0
25/07/2016 13:50	AMAR379.9.20160725T135020Z.wav_chan0.xml	0	0
25/07/2016 14:04	AMAR379.9.20160725T140447Z.wav_chan0.xml	0	0
25/07/2016 14:19	AMAR379.9.20160725T141914Z.wav_chan0.xml	0	0
25/07/2016 14:33	AMAR379.9.20160725T143341Z.wav_chan0.xml	0	0
25/07/2016 14:48	AMAR379.9.20160725T144808Z.wav_chan0.xml	0	0
25/07/2016 15:02	AMAR379.9.20160725T150235Z.wav_chan0.xml	0	0
25/07/2016 15:17	AMAR379.9.20160725T151702Z.wav_chan0.xml	0	0
25/07/2016 15:31	AMAR379.9.20160725T153129Z.wav_chan0.xml	0	0
25/07/2016 15:45	AMAR379.9.20160725T154556Z.wav_chan0.xml	0	0
25/07/2016 16:00	AMAR379.9.20160725T160023Z.wav_chan0.xml	0	0
25/07/2016 16:14	AMAR379.9.20160725T161450Z.wav_chan0.xml	0	0
25/07/2016 16:29	AMAR379.9.20160725T162917Z.wav_chan0.xml	0	0
25/07/2016 16:43	AMAR379.9.20160725T164344Z.wav_chan0.xml	0	0
25/07/2016 16:58	AMAR379.9.20160725T165811Z.wav_chan0.xml	0	0
25/07/2016 17:12	AMAR379.9.20160725T171238Z.wav_chan0.xml	0	0
25/07/2016 17:27	AMAR379.9.20160725T172705Z.wav_chan0.xml	0	0
25/07/2016 17:41	AMAR379.9.20160725T174132Z.wav_chan0.xml	0	0
25/07/2016 17:55	AMAR379.9.20160725T175559Z.wav_chan0.xml	0	0
25/07/2016 18:10	AMAR379.9.20160725T181026Z.wav_chan0.xml	0	0
25/07/2016 18:24	AMAR379.9.20160725T182453Z.wav_chan0.xml	0	0
25/07/2016 18:39	AMAR379.9.20160725T183920Z.wav_chan0.xml	0	0
25/07/2016 18:53	AMAR379.9.20160725T185347Z.wav_chan0.xml	0	0
25/07/2016 19:08	AMAR379.9.20160725T190814Z.wav_chan0.xml	0	0
25/07/2016 19:22	AMAR379.9.20160725T192241Z.wav_chan0.xml	0	0
25/07/2016 19:37	AMAR379.9.20160725T193708Z.wav_chan0.xml	0	0
25/07/2016 19:51	AMAR379.9.20160725T195135Z.wav_chan0.xml	0	0
25/07/2016 20:06	AMAR379.9.20160725T200602Z.wav_chan0.xml	0	0
25/07/2016 20:20	AMAR379.9.20160725T202029Z.wav_chan0.xml	0	0
25/07/2016 20:34	AMAR379.9.20160725T203456Z.wav_chan0.xml	0	0
25/07/2016 20:49	AMAR379.9.20160725T204923Z.wav_chan0.xml	0	0
25/07/2016 21:03	AMAR379.9.20160725T210350Z.wav_chan0.xml	0	0
25/07/2016 21:18	AMAR379.9.20160725T211817Z.wav_chan0.xml	0	0
25/07/2016 21:32	AMAR379.9.20160725T213244Z.wav_chan0.xml	0	0
25/07/2016 21:47	AMAR379.9.20160725T214711Z.wav_chan0.xml	0	0
25/07/2016 22:01	AMAR379.9.20160725T220138Z.wav_chan0.xml	0	0
25/07/2016 22:16	AMAR379.9.20160725T221605Z.wav_chan0.xml	0	0
25/07/2016 22:30	AMAR379.9.20160725T223032Z.wav_chan0.xml	0	0
25/07/2016 22:44	AMAR379.9.20160725T224459Z.wav_chan0.xml	0	0
25/07/2016 22:59	AMAR379.9.20160725T225926Z.wav_chan0.xml	0	0
25/07/2016 23:13	AMAR379.9.20160725T231353Z.wav_chan0.xml	0	0
25/07/2016 23:28	AMAR379.9.20160725T232820Z.wav_chan0.xml	0	0
25/07/2016 23:42	AMAR379.9.20160725T234247Z.wav_chan0.xml	0	0
25/07/2016 23:57	AMAR379.9.20160725T235714Z.wav_chan0.xml	0	0
26/07/2016 0:11	AMAR379.9.20160726T001141Z.wav_chan0.xml	0	0
26/07/2016 0:26	AMAR379.9.20160726T002608Z.wav_chan0.xml	0	0
26/07/2016 0:40	AMAR379.9.20160726T004035Z.wav_chan0.xml	0	0
26/07/2016 0:55	AMAR379.9.20160726T005502Z.wav_chan0.xml	0	0
26/07/2016 1:09	AMAR379.9.20160726T010929Z.wav_chan0.xml	0	0
26/07/2016 1:23	AMAR379.9.20160726T012356Z.wav_chan0.xml	0	0
26/07/2016 1:38	AMAR379.9.20160726T013823Z.wav_chan0.xml	0	0
26/07/2016 1:52	AMAR379.9.20160726T015250Z.wav_chan0.xml	0	0
26/07/2016 2:07	AMAR379.9.20160726T020717Z.wav_chan0.xml	0	0
26/07/2016 2:21	AMAR379.9.20160726T022144Z.wav_chan0.xml	0	0
26/07/2016 2:36	AMAR379.9.20160726T023611Z.wav_chan0.xml	0	0
26/07/2016 2:50	AMAR379.9.20160726T025038Z.wav_chan0.xml	0	0
26/07/2016 3:05	AMAR379.9.20160726T030505Z.wav_chan0.xml	3	0
26/07/2016 3:19	AMAR379.9.20160726T031932Z.wav_chan0.xml	0	0
26/07/2016 3:33	AMAR379.9.20160726T033359Z.wav_chan0.xml	0	0
26/07/2016 3:48	AMAR379.9.20160726T034826Z.wav_chan0.xml	0	0
26/07/2016 4:02	AMAR379.9.20160726T040253Z.wav_chan0.xml	0	0
26/07/2016 4:17	AMAR379.9.20160726T041720Z.wav_chan0.xml	0	0
26/07/2016 4:31	AMAR379.9.20160726T043147Z.wav_chan0.xml	0	0
26/07/2016 4:46	AMAR379.9.20160726T044614Z.wav_chan0.xml	0	0
26/07/2016 5:00	AMAR379.9.20160726T050041Z.wav_chan0.xml	0	0
26/07/2016 5:15	AMAR379.9.20160726T051508Z.wav_chan0.xml	0	0
26/07/2016 5:29	AMAR379.9.20160726T052935Z.wav_chan0.xml	0	0
26/07/2016 5:44	AMAR379.9.20160726T054402Z.wav_chan0.xml	0	0
26/07/2016 5:58	AMAR379.9.20160726T055829Z.wav_chan0.xml	0	0
26/07/2016 6:12	AMAR379.9.20160726T061256Z.wav_chan0.xml	0	0
26/07/2016 6:27	AMAR379.9.20160726T062723Z.wav_chan0.xml	0	0
26/07/2016 6:41	AMAR379.9.20160726T064150Z.wav_chan0.xml	0	0
26/07/2016 6:56	AMAR379.9.20160726T065617Z.wav_chan0.xml	7	0
26/07/2016 7:10	AMAR379.9.20160726T071044Z.wav_chan0.xml	0	0
26/07/2016 7:25	AMAR379.9.20160726T072511Z.wav_chan0.xml	0	0
26/07/2016 7:39	AMAR379.9.20160726T073938Z.wav_chan0.xml	0	0
26/07/2016 7:54	AMAR379.9.20160726T075405Z.wav_chan0.xml	0	0
26/07/2016 8:08	AMAR379.9.20160726T080832Z.wav_chan0.xml	0	0
26/07/2016 8:22	AMAR379.9.20160726T082259Z.wav_chan0.xml	0	0
26/07/2016 8:37	AMAR379.9.20160726T083726Z.wav_chan0.xml	0	0
26/07/2016 8:51	AMAR379.9.20160726T085153Z.wav_chan0.xml	0	0
26/07/2016 9:06	AMAR379.9.20160726T090620Z.wav_chan0.xml	3	0
26/07/2016 9:20	AMAR379.9.20160726T092047Z.wav_chan0.xml	0	0
26/07/2016 9:35	AMAR379.9.20160726T093514Z.wav_chan0.xml	9	0
26/07/2016 9:49	AMAR379.9.20160726T094941Z.wav_chan0.xml	0	0
26/07/2016 10:04	AMAR379.9.20160726T100408Z.wav_chan0.xml	0	0
26/07/2016 10:18	AMAR379.9.20160726T101835Z.wav_chan0.xml	0	0
26/07/2016 10:33	AMAR379.9.20160726T103302Z.wav_chan0.xml	0	0
26/07/2016 10:47	AMAR379.9.20160726T104729Z.wav_chan0.xml	0	0
26/07/2016 11:01	AMAR379.9.20160726T110156Z.wav_chan0.xml	0	0
26/07/2016 11:16	AMAR379.9.20160726T111623Z.wav_chan0.xml	0	0
26/07/2016 11:30	AMAR379.9.20160726T113050Z.wav_chan0.xml	0	0
26/07/2016 11:45	AMAR379.9.20160726T114517Z.wav_chan0.xml	0	0
26/07/2016 11:59	AMAR379.9.20160726T115944Z.wav_chan0.xml	0	0
26/07/2016 12:14	AMAR379.9.20160726T121411Z.wav_chan0.xml	0	0
26/07/2016 12:28	AMAR379.9.20160726T122838Z.wav_chan0.xml	0	0
26/07/2016 12:43	AMAR379.9.20160726T124305Z.wav_chan0.xml	0	0
26/07/2016 12:57	AMAR379.9.20160726T125732Z.wav_chan0.xml	0	0
26/07/2016 13:11	AMAR379.9.20160726T131159Z.wav_chan0.xml	0	0
26/07/2016 13:26	AMAR379.9.20160726T132626Z.wav_chan0.xml	0	0
26/07/2016 13:40	AMAR379.9.20160726T134053Z.wav_chan0.xml	0	0
26/07/2016 13:55	AMAR379.9.20160726T135520Z.wav_chan0.xml	0	0
26/07/2016 14:09	AMAR379.9.20160726T140947Z.wav_chan0.xml	0	0
26/07/2016 14:24	AMAR379.9.20160726T142414Z.wav_chan0.xml	0	0
26/07/2016 14:38	AMAR379.9.20160726T143841Z.wav_chan0.xml	0	0
26/07/2016 14:53	AMAR379.9.20160726T145308Z.wav_chan0.xml	0	0
26/07/2016 15:07	AMAR379.9.20160726T150735Z.wav_chan0.xml	0	0
26/07/2016 15:22	AMAR379.9.20160726T152202Z.wav_chan0.xml	0	0
26/07/2016 15:36	AMAR379.9.20160726T153629Z.wav_chan0.xml	0	0
26/07/2016 15:50	AMAR379.9.20160726T155056Z.wav_chan0.xml	0	0
26/07/2016 16:05	AMAR379.9.20160726T160523Z.wav_chan0.xml	0	0
26/07/2016 16:19	AMAR379.9.20160726T161950Z.wav_chan0.xml	0	0
26/07/2016 16:34	AMAR379.9.20160726T163417Z.wav_chan0.xml	0	0
26/07/2016 16:48	AMAR379.9.20160726T164844Z.wav_chan0.xml	0	0
26/07/2016 17:03	AMAR379.9.20160726T170311Z.wav_chan0.xml	0	0
26/07/2016 17:17	AMAR379.9.20160726T171738Z.wav_chan0.xml	0	0
26/07/2016 17:32	AMAR379.9.20160726T173205Z.wav_chan0.xml	0	0
26/07/2016 17:46	AMAR379.9.20160726T174632Z.wav_chan0.xml	0	0
26/07/2016 18:00	AMAR379.9.20160726T180059Z.wav_chan0.xml	0	0
26/07/2016 18:15	AMAR379.9.20160726T181526Z.wav_chan0.xml	0	0
26/07/2016 18:29	AMAR379.9.20160726T182953Z.wav_chan0.xml	0	0
26/07/2016 18:44	AMAR379.9.20160726T184420Z.wav_chan0.xml	0	0
26/07/2016 18:58	AMAR379.9.20160726T185847Z.wav_chan0.xml	0	0
26/07/2016 19:13	AMAR379.9.20160726T191314Z.wav_chan0.xml	0	0
26/07/2016 19:27	AMAR379.9.20160726T192741Z.wav_chan0.xml	0	0
26/07/2016 19:42	AMAR379.9.20160726T194208Z.wav_chan0.xml	0	0
26/07/2016 19:56	AMAR379.9.20160726T195635Z.wav_chan0.xml	0	0
26/07/2016 20:11	AMAR379.9.20160726T201102Z.wav_chan0.xml	0	0
26/07/2016 20:25	AMAR379.9.20160726T202529Z.wav_chan0.xml	0	0
26/07/2016 20:39	AMAR379.9.20160726T203956Z.wav_chan0.xml	0	0
26/07/2016 20:54	AMAR379.9.20160726T205423Z.wav_chan0.xml	0	0
26/07/2016 21:08	AMAR379.9.20160726T210850Z.wav_chan0.xml	0	0
26/07/2016 21:23	AMAR379.9.20160726T212317Z.wav_chan0.xml	0	0
26/07/2016 21:37	AMAR379.9.20160726T213744Z.wav_chan0.xml	0	0
26/07/2016 21:52	AMAR379.9.20160726T215211Z.wav_chan0.xml	0	0
26/07/2016 22:06	AMAR379.9.20160726T220638Z.wav_chan0.xml	0	0
26/07/2016 22:21	AMAR379.9.20160726T222105Z.wav_chan0.xml	0	0
26/07/2016 22:35	AMAR379.9.20160726T223532Z.wav_chan0.xml	0	0
26/07/2016 22:49	AMAR379.9.20160726T224959Z.wav_chan0.xml	0	0
26/07/2016 23:04	AMAR379.9.20160726T230426Z.wav_chan0.xml	0	0
26/07/2016 23:18	AMAR379.9.20160726T231853Z.wav_chan0.xml	0	0
26/07/2016 23:33	AMAR379.9.20160726T233320Z.wav_chan0.xml	0	0
26/07/2016 23:47	AMAR379.9.20160726T234747Z.wav_chan0.xml	0	0
27/07/2016 0:02	AMAR379.9.20160727T000214Z.wav_chan0.xml	0	0
27/07/2016 0:16	AMAR379.9.20160727T001641Z.wav_chan0.xml	0	0
27/07/2016 0:31	AMAR379.9.20160727T003108Z.wav_chan0.xml	0	0
27/07/2016 0:45	AMAR379.9.20160727T004535Z.wav_chan0.xml	0	0
27/07/2016 1:00	AMAR379.9.20160727T010002Z.wav_chan0.xml	0	0
27/07/2016 1:14	AMAR379.9.20160727T011429Z.wav_chan0.xml	0	0
27/07/2016 1:28	AMAR379.9.20160727T012856Z.wav_chan0.xml	0	0
27/07/2016 1:43	AMAR379.9.20160727T014323Z.wav_chan0.xml	0	0
27/07/2016 1:57	AMAR379.9.20160727T015750Z.wav_chan0.xml	0	0
27/07/2016 2:12	AMAR379.9.20160727T021217Z.wav_chan0.xml	0	0
27/07/2016 2:26	AMAR379.9.20160727T022644Z.wav_chan0.xml	0	0
27/07/2016 2:41	AMAR379.9.20160727T024111Z.wav_chan0.xml	0	0
27/07/2016 2:55	AMAR379.9.20160727T025538Z.wav_chan0.xml	0	0
27/07/2016 3:10	AMAR379.9.20160727T031005Z.wav_chan0.xml	0	0
27/07/2016 3:24	AMAR379.9.20160727T032432Z.wav_chan0.xml	0	0
27/07/2016 3:38	AMAR379.9.20160727T033859Z.wav_chan0.xml	0	0
27/07/2016 3:53	AMAR379.9.20160727T035326Z.wav_chan0.xml	0	0
27/07/2016 4:07	AMAR379.9.20160727T040753Z.wav_chan0.xml	0	0
27/07/2016 4:22	AMAR379.9.20160727T042220Z.wav_chan0.xml	0	0
27/07/2016 4:36	AMAR379.9.20160727T043647Z.wav_chan0.xml	0	0
27/07/2016 4:51	AMAR379.9.20160727T045114Z.wav_chan0.xml	0	0
27/07/2016 5:05	AMAR379.9.20160727T050541Z.wav_chan0.xml	0	0
27/07/2016 5:20	AMAR379.9.20160727T052008Z.wav_chan0.xml	0	0
27/07/2016 5:34	AMAR379.9.20160727T053435Z.wav_chan0.xml	0	0
27/07/2016 5:49	AMAR379.9.20160727T054902Z.wav_chan0.xml	0	0
27/07/2016 6:03	AMAR379.9.20160727T060329Z.wav_chan0.xml	0	0
27/07/2016 6:17	AMAR379.9.20160727T061756Z.wav_chan0.xml	0	0
27/07/2016 6:32	AMAR379.9.20160727T063223Z.wav_chan0.xml	0	0
27/07/2016 6:46	AMAR379.9.20160727T064650Z.wav_chan0.xml	0	0
27/07/2016 7:01	AMAR379.9.20160727T070117Z.wav_chan0.xml	0	0
27/07/2016 7:15	AMAR379.9.20160727T071544Z.wav_chan0.xml	0	0
27/07/2016 7:30	AMAR379.9.20160727T073011Z.wav_chan0.xml	0	0
27/07/2016 7:44	AMAR379.9.20160727T074438Z.wav_chan0.xml	0	0
27/07/2016 7:59	AMAR379.9.20160727T075905Z.wav_chan0.xml	0	0
27/07/2016 8:13	AMAR379.9.20160727T081332Z.wav_chan0.xml	0	1
27/07/2016 8:27	AMAR379.9.20160727T082759Z.wav_chan0.xml	1	0
27/07/2016 8:42	AMAR379.9.20160727T084226Z.wav_chan0.xml	0	1
27/07/2016 8:56	AMAR379.9.20160727T085653Z.wav_chan0.xml	0	0
27/07/2016 9:11	AMAR379.9.20160727T091120Z.wav_chan0.xml	0	0
27/07/2016 9:25	AMAR379.9.20160727T092547Z.wav_chan0.xml	0	0
27/07/2016 9:40	AMAR379.9.20160727T094014Z.wav_chan0.xml	0	0
27/07/2016 9:54	AMAR379.9.20160727T095441Z.wav_chan0.xml	0	0
27/07/2016 10:09	AMAR379.9.20160727T100908Z.wav_chan0.xml	0	0
27/07/2016 10:23	AMAR379.9.20160727T102335Z.wav_chan0.xml	0	0
27/07/2016 10:38	AMAR379.9.20160727T103802Z.wav_chan0.xml	0	0
27/07/2016 10:52	AMAR379.9.20160727T105229Z.wav_chan0.xml	0	0
27/07/2016 11:06	AMAR379.9.20160727T110656Z.wav_chan0.xml	0	0
27/07/2016 11:21	AMAR379.9.20160727T112123Z.wav_chan0.xml	0	0
27/07/2016 11:35	AMAR379.9.20160727T113550Z.wav_chan0.xml	0	0
27/07/2016 11:50	AMAR379.9.20160727T115017Z.wav_chan0.xml	0	0
27/07/2016 12:04	AMAR379.9.20160727T120444Z.wav_chan0.xml	0	0
27/07/2016 12:19	AMAR379.9.20160727T121911Z.wav_chan0.xml	0	0
27/07/2016 12:33	AMAR379.9.20160727T123338Z.wav_chan0.xml	0	0
27/07/2016 12:48	AMAR379.9.20160727T124805Z.wav_chan0.xml	0	0
27/07/2016 13:02	AMAR379.9.20160727T130232Z.wav_chan0.xml	0	0
27/07/2016 13:16	AMAR379.9.20160727T131659Z.wav_chan0.xml	0	0
27/07/2016 13:31	AMAR379.9.20160727T133126Z.wav_chan0.xml	0	0
27/07/2016 13:45	AMAR379.9.20160727T134553Z.wav_chan0.xml	0	0
27/07/2016 14:00	AMAR379.9.20160727T140020Z.wav_chan0.xml	7	0
27/07/2016 14:14	AMAR379.9.20160727T141447Z.wav_chan0.xml	3	0
27/07/2016 14:29	AMAR379.9.20160727T142914Z.wav_chan0.xml	0	0
27/07/2016 14:43	AMAR379.9.20160727T144341Z.wav_chan0.xml	0	0
27/07/2016 14:58	AMAR379.9.20160727T145808Z.wav_chan0.xml	0	0
27/07/2016 15:12	AMAR379.9.20160727T151235Z.wav_chan0.xml	0	0
27/07/2016 15:27	AMAR379.9.20160727T152702Z.wav_chan0.xml	0	0
27/07/2016 15:41	AMAR379.9.20160727T154129Z.wav_chan0.xml	0	0
27/07/2016 15:55	AMAR379.9.20160727T155556Z.wav_chan0.xml	0	0
27/07/2016 16:10	AMAR379.9.20160727T161023Z.wav_chan0.xml	0	0
27/07/2016 16:24	AMAR379.9.20160727T162450Z.wav_chan0.xml	0	0
27/07/2016 16:39	AMAR379.9.20160727T163917Z.wav_chan0.xml	0	0
27/07/2016 16:53	AMAR379.9.20160727T165344Z.wav_chan0.xml	0	0
27/07/2016 17:08	AMAR379.9.20160727T170811Z.wav_chan0.xml	0	0
27/07/2016 17:22	AMAR379.9.20160727T172238Z.wav_chan0.xml	0	0
27/07/2016 17:37	AMAR379.9.20160727T173705Z.wav_chan0.xml	0	0
27/07/2016 17:51	AMAR379.9.20160727T175132Z.wav_chan0.xml	0	0
27/07/2016 18:05	AMAR379.9.20160727T180559Z.wav_chan0.xml	0	0
27/07/2016 18:20	AMAR379.9.20160727T182026Z.wav_chan0.xml	0	1
27/07/2016 18:34	AMAR379.9.20160727T183453Z.wav_chan0.xml	0	0
27/07/2016 18:49	AMAR379.9.20160727T184920Z.wav_chan0.xml	0	0
27/07/2016 19:03	AMAR379.9.20160727T190347Z.wav_chan0.xml	0	0
27/07/2016 19:18	AMAR379.9.20160727T191814Z.wav_chan0.xml	8	0
27/07/2016 19:32	AMAR379.9.20160727T193241Z.wav_chan0.xml	11	0
27/07/2016 19:47	AMAR379.9.20160727T194708Z.wav_chan0.xml	0	0
27/07/2016 20:01	AMAR379.9.20160727T200135Z.wav_chan0.xml	0	0
27/07/2016 20:16	AMAR379.9.20160727T201602Z.wav_chan0.xml	0	0
27/07/2016 20:30	AMAR379.9.20160727T203029Z.wav_chan0.xml	0	0
27/07/2016 20:44	AMAR379.9.20160727T204456Z.wav_chan0.xml	0	0
27/07/2016 20:59	AMAR379.9.20160727T205923Z.wav_chan0.xml	0	0
27/07/2016 21:13	AMAR379.9.20160727T211350Z.wav_chan0.xml	0	0
27/07/2016 21:28	AMAR379.9.20160727T212817Z.wav_chan0.xml	0	0
27/07/2016 21:42	AMAR379.9.20160727T214244Z.wav_chan0.xml	0	0
27/07/2016 21:57	AMAR379.9.20160727T215711Z.wav_chan0.xml	0	0
27/07/2016 22:11	AMAR379.9.20160727T221138Z.wav_chan0.xml	0	0
27/07/2016 22:26	AMAR379.9.20160727T222605Z.wav_chan0.xml	0	0
27/07/2016 22:40	AMAR379.9.20160727T224032Z.wav_chan0.xml	0	0
27/07/2016 22:54	AMAR379.9.20160727T225459Z.wav_chan0.xml	0	0
27/07/2016 23:09	AMAR379.9.20160727T230926Z.wav_chan0.xml	0	0
27/07/2016 23:23	AMAR379.9.20160727T232353Z.wav_chan0.xml	0	0
27/07/2016 23:38	AMAR379.9.20160727T233820Z.wav_chan0.xml	0	0
27/07/2016 23:52	AMAR379.9.20160727T235247Z.wav_chan0.xml	0	0
28/07/2016 0:07	AMAR379.9.20160728T000714Z.wav_chan0.xml	9	0
28/07/2016 0:21	AMAR379.9.20160728T002141Z.wav_chan0.xml	0	0
28/07/2016 0:36	AMAR379.9.20160728T003608Z.wav_chan0.xml	0	0
28/07/2016 0:50	AMAR379.9.20160728T005035Z.wav_chan0.xml	0	0
28/07/2016 1:05	AMAR379.9.20160728T010502Z.wav_chan0.xml	0	0
28/07/2016 1:19	AMAR379.9.20160728T011929Z.wav_chan0.xml	1	0
28/07/2016 1:33	AMAR379.9.20160728T013356Z.wav_chan0.xml	0	0
28/07/2016 1:48	AMAR379.9.20160728T014823Z.wav_chan0.xml	0	0
28/07/2016 2:02	AMAR379.9.20160728T020250Z.wav_chan0.xml	0	0
28/07/2016 2:17	AMAR379.9.20160728T021717Z.wav_chan0.xml	0	0
28/07/2016 2:31	AMAR379.9.20160728T023144Z.wav_chan0.xml	0	0
28/07/2016 2:46	AMAR379.9.20160728T024611Z.wav_chan0.xml	0	0
28/07/2016 3:00	AMAR379.9.20160728T030038Z.wav_chan0.xml	0	0
28/07/2016 3:15	AMAR379.9.20160728T031505Z.wav_chan0.xml	0	0
28/07/2016 3:29	AMAR379.9.20160728T032932Z.wav_chan0.xml	0	0
28/07/2016 3:43	AMAR379.9.20160728T034359Z.wav_chan0.xml	0	0
28/07/2016 3:58	AMAR379.9.20160728T035826Z.wav_chan0.xml	0	0
28/07/2016 4:12	AMAR379.9.20160728T041253Z.wav_chan0.xml	0	0
28/07/2016 4:27	AMAR379.9.20160728T042720Z.wav_chan0.xml	0	0
28/07/2016 4:41	AMAR379.9.20160728T044147Z.wav_chan0.xml	0	0
28/07/2016 4:56	AMAR379.9.20160728T045614Z.wav_chan0.xml	0	0
28/07/2016 5:10	AMAR379.9.20160728T051041Z.wav_chan0.xml	0	0
28/07/2016 5:25	AMAR379.9.20160728T052508Z.wav_chan0.xml	0	0
28/07/2016 5:39	AMAR379.9.20160728T053935Z.wav_chan0.xml	0	0
28/07/2016 5:54	AMAR379.9.20160728T055402Z.wav_chan0.xml	0	0
28/07/2016 6:08	AMAR379.9.20160728T060829Z.wav_chan0.xml	0	0
28/07/2016 6:22	AMAR379.9.20160728T062256Z.wav_chan0.xml	0	0
28/07/2016 6:37	AMAR379.9.20160728T063723Z.wav_chan0.xml	0	0
28/07/2016 6:51	AMAR379.9.20160728T065150Z.wav_chan0.xml	0	0
28/07/2016 7:06	AMAR379.9.20160728T070617Z.wav_chan0.xml	0	0
28/07/2016 7:20	AMAR379.9.20160728T072044Z.wav_chan0.xml	0	0
28/07/2016 7:35	AMAR379.9.20160728T073511Z.wav_chan0.xml	0	0
28/07/2016 7:49	AMAR379.9.20160728T074938Z.wav_chan0.xml	0	0
28/07/2016 8:04	AMAR379.9.20160728T080405Z.wav_chan0.xml	0	0
28/07/2016 8:18	AMAR379.9.20160728T081832Z.wav_chan0.xml	0	0
28/07/2016 8:32	AMAR379.9.20160728T083259Z.wav_chan0.xml	0	0
28/07/2016 8:47	AMAR379.9.20160728T084726Z.wav_chan0.xml	0	0
28/07/2016 9:01	AMAR379.9.20160728T090153Z.wav_chan0.xml	0	0
28/07/2016 9:16	AMAR379.9.20160728T091620Z.wav_chan0.xml	0	0
28/07/2016 9:30	AMAR379.9.20160728T093047Z.wav_chan0.xml	0	0
28/07/2016 9:45	AMAR379.9.20160728T094514Z.wav_chan0.xml	0	0
28/07/2016 9:59	AMAR379.9.20160728T095941Z.wav_chan0.xml	0	0
28/07/2016 10:14	AMAR379.9.20160728T101408Z.wav_chan0.xml	0	0
28/07/2016 10:28	AMAR379.9.20160728T102835Z.wav_chan0.xml	0	0
28/07/2016 10:43	AMAR379.9.20160728T104302Z.wav_chan0.xml	1	0
28/07/2016 10:57	AMAR379.9.20160728T105729Z.wav_chan0.xml	0	0
28/07/2016 11:11	AMAR379.9.20160728T111156Z.wav_chan0.xml	0	0
28/07/2016 11:26	AMAR379.9.20160728T112623Z.wav_chan0.xml	0	0
28/07/2016 11:40	AMAR379.9.20160728T114050Z.wav_chan0.xml	0	0
28/07/2016 11:55	AMAR379.9.20160728T115517Z.wav_chan0.xml	0	0
28/07/2016 12:09	AMAR379.9.20160728T120944Z.wav_chan0.xml	0	0
28/07/2016 12:24	AMAR379.9.20160728T122411Z.wav_chan0.xml	0	0
28/07/2016 12:38	AMAR379.9.20160728T123838Z.wav_chan0.xml	0	0
28/07/2016 12:53	AMAR379.9.20160728T125305Z.wav_chan0.xml	0	0
28/07/2016 13:07	AMAR379.9.20160728T130732Z.wav_chan0.xml	0	0
28/07/2016 13:21	AMAR379.9.20160728T132159Z.wav_chan0.xml	0	0
28/07/2016 13:36	AMAR379.9.20160728T133626Z.wav_chan0.xml	0	0
28/07/2016 13:50	AMAR379.9.20160728T135053Z.wav_chan0.xml	0	0
28/07/2016 14:05	AMAR379.9.20160728T140520Z.wav_chan0.xml	0	0
28/07/2016 14:19	AMAR379.9.20160728T141947Z.wav_chan0.xml	0	0
28/07/2016 14:34	AMAR379.9.20160728T143414Z.wav_chan0.xml	0	0
28/07/2016 14:48	AMAR379.9.20160728T144841Z.wav_chan0.xml	0	0
28/07/2016 15:03	AMAR379.9.20160728T150308Z.wav_chan0.xml	0	0
28/07/2016 15:17	AMAR379.9.20160728T151735Z.wav_chan0.xml	0	0
28/07/2016 15:32	AMAR379.9.20160728T153202Z.wav_chan0.xml	0	0
28/07/2016 15:46	AMAR379.9.20160728T154629Z.wav_chan0.xml	0	0
28/07/2016 16:00	AMAR379.9.20160728T160056Z.wav_chan0.xml	0	0
28/07/2016 16:15	AMAR379.9.20160728T161523Z.wav_chan0.xml	0	0
28/07/2016 16:29	AMAR379.9.20160728T162950Z.wav_chan0.xml	0	0
28/07/2016 16:44	AMAR379.9.20160728T164417Z.wav_chan0.xml	0	0
28/07/2016 16:58	AMAR379.9.20160728T165844Z.wav_chan0.xml	0	0
28/07/2016 17:13	AMAR379.9.20160728T171311Z.wav_chan0.xml	0	0
28/07/2016 17:27	AMAR379.9.20160728T172738Z.wav_chan0.xml	0	0
28/07/2016 17:42	AMAR379.9.20160728T174205Z.wav_chan0.xml	0	0
28/07/2016 17:56	AMAR379.9.20160728T175632Z.wav_chan0.xml	0	0
28/07/2016 18:10	AMAR379.9.20160728T181059Z.wav_chan0.xml	0	0
28/07/2016 18:25	AMAR379.9.20160728T182526Z.wav_chan0.xml	0	0
28/07/2016 18:39	AMAR379.9.20160728T183953Z.wav_chan0.xml	0	0
28/07/2016 18:54	AMAR379.9.20160728T185420Z.wav_chan0.xml	0	0
28/07/2016 19:08	AMAR379.9.20160728T190847Z.wav_chan0.xml	0	0
28/07/2016 19:23	AMAR379.9.20160728T192314Z.wav_chan0.xml	0	0
28/07/2016 19:37	AMAR379.9.20160728T193741Z.wav_chan0.xml	0	0
28/07/2016 19:52	AMAR379.9.20160728T195208Z.wav_chan0.xml	0	0
28/07/2016 20:06	AMAR379.9.20160728T200635Z.wav_chan0.xml	0	0
28/07/2016 20:21	AMAR379.9.20160728T202102Z.wav_chan0.xml	0	0
28/07/2016 20:35	AMAR379.9.20160728T203529Z.wav_chan0.xml	0	0
28/07/2016 20:49	AMAR379.9.20160728T204956Z.wav_chan0.xml	0	0
28/07/2016 21:04	AMAR379.9.20160728T210423Z.wav_chan0.xml	0	0
28/07/2016 21:18	AMAR379.9.20160728T211850Z.wav_chan0.xml	0	0
28/07/2016 21:33	AMAR379.9.20160728T213317Z.wav_chan0.xml	0	0
28/07/2016 21:47	AMAR379.9.20160728T214744Z.wav_chan0.xml	0	0
28/07/2016 22:02	AMAR379.9.20160728T220211Z.wav_chan0.xml	0	0
28/07/2016 22:16	AMAR379.9.20160728T221638Z.wav_chan0.xml	0	0
28/07/2016 22:31	AMAR379.9.20160728T223105Z.wav_chan0.xml	0	0
28/07/2016 22:45	AMAR379.9.20160728T224532Z.wav_chan0.xml	0	0
28/07/2016 22:59	AMAR379.9.20160728T225959Z.wav_chan0.xml	0	0
28/07/2016 23:14	AMAR379.9.20160728T231426Z.wav_chan0.xml	0	0
28/07/2016 23:28	AMAR379.9.20160728T232853Z.wav_chan0.xml	0	0
28/07/2016 23:43	AMAR379.9.20160728T234320Z.wav_chan0.xml	0	0
28/07/2016 23:57	AMAR379.9.20160728T235747Z.wav_chan0.xml	0	1
29/07/2016 0:12	AMAR379.9.20160729T001214Z.wav_chan0.xml	0	0
29/07/2016 0:26	AMAR379.9.20160729T002641Z.wav_chan0.xml	0	0
29/07/2016 0:41	AMAR379.9.20160729T004108Z.wav_chan0.xml	0	0
29/07/2016 0:55	AMAR379.9.20160729T005535Z.wav_chan0.xml	0	0
29/07/2016 1:10	AMAR379.9.20160729T011002Z.wav_chan0.xml	0	0
29/07/2016 1:24	AMAR379.9.20160729T012429Z.wav_chan0.xml	0	0
29/07/2016 1:38	AMAR379.9.20160729T013856Z.wav_chan0.xml	0	0
29/07/2016 1:53	AMAR379.9.20160729T015323Z.wav_chan0.xml	0	0
29/07/2016 2:07	AMAR379.9.20160729T020750Z.wav_chan0.xml	0	0
29/07/2016 2:22	AMAR379.9.20160729T022217Z.wav_chan0.xml	0	0
29/07/2016 2:36	AMAR379.9.20160729T023644Z.wav_chan0.xml	0	0
29/07/2016 2:51	AMAR379.9.20160729T025111Z.wav_chan0.xml	0	0
29/07/2016 3:05	AMAR379.9.20160729T030538Z.wav_chan0.xml	0	0
29/07/2016 3:20	AMAR379.9.20160729T032005Z.wav_chan0.xml	0	0
29/07/2016 3:34	AMAR379.9.20160729T033432Z.wav_chan0.xml	0	0
29/07/2016 3:48	AMAR379.9.20160729T034859Z.wav_chan0.xml	0	0
29/07/2016 4:03	AMAR379.9.20160729T040326Z.wav_chan0.xml	0	0
29/07/2016 4:17	AMAR379.9.20160729T041753Z.wav_chan0.xml	0	0
29/07/2016 4:32	AMAR379.9.20160729T043220Z.wav_chan0.xml	0	0
29/07/2016 4:46	AMAR379.9.20160729T044647Z.wav_chan0.xml	0	0
29/07/2016 5:01	AMAR379.9.20160729T050114Z.wav_chan0.xml	0	0
29/07/2016 5:15	AMAR379.9.20160729T051541Z.wav_chan0.xml	0	0
29/07/2016 5:30	AMAR379.9.20160729T053008Z.wav_chan0.xml	0	0
29/07/2016 5:44	AMAR379.9.20160729T054435Z.wav_chan0.xml	0	0
29/07/2016 5:59	AMAR379.9.20160729T055902Z.wav_chan0.xml	0	0
29/07/2016 6:13	AMAR379.9.20160729T061329Z.wav_chan0.xml	0	0
29/07/2016 6:27	AMAR379.9.20160729T062756Z.wav_chan0.xml	0	0
29/07/2016 6:42	AMAR379.9.20160729T064223Z.wav_chan0.xml	0	0
29/07/2016 6:56	AMAR379.9.20160729T065650Z.wav_chan0.xml	0	0
29/07/2016 7:11	AMAR379.9.20160729T071117Z.wav_chan0.xml	0	0
29/07/2016 7:25	AMAR379.9.20160729T072544Z.wav_chan0.xml	0	0
29/07/2016 7:40	AMAR379.9.20160729T074011Z.wav_chan0.xml	0	0
29/07/2016 7:54	AMAR379.9.20160729T075438Z.wav_chan0.xml	0	0
29/07/2016 8:09	AMAR379.9.20160729T080905Z.wav_chan0.xml	0	0
29/07/2016 8:23	AMAR379.9.20160729T082332Z.wav_chan0.xml	0	0
29/07/2016 8:37	AMAR379.9.20160729T083759Z.wav_chan0.xml	0	0
29/07/2016 8:52	AMAR379.9.20160729T085226Z.wav_chan0.xml	0	0
29/07/2016 9:06	AMAR379.9.20160729T090653Z.wav_chan0.xml	0	0
29/07/2016 9:21	AMAR379.9.20160729T092120Z.wav_chan0.xml	0	0
29/07/2016 9:35	AMAR379.9.20160729T093547Z.wav_chan0.xml	0	0
29/07/2016 9:50	AMAR379.9.20160729T095014Z.wav_chan0.xml	0	0
29/07/2016 10:04	AMAR379.9.20160729T100441Z.wav_chan0.xml	0	0
29/07/2016 10:19	AMAR379.9.20160729T101908Z.wav_chan0.xml	0	0
29/07/2016 10:33	AMAR379.9.20160729T103335Z.wav_chan0.xml	0	0
29/07/2016 10:48	AMAR379.9.20160729T104802Z.wav_chan0.xml	0	0
29/07/2016 11:02	AMAR379.9.20160729T110229Z.wav_chan0.xml	0	0
29/07/2016 11:16	AMAR379.9.20160729T111656Z.wav_chan0.xml	0	0
29/07/2016 11:31	AMAR379.9.20160729T113123Z.wav_chan0.xml	0	0
29/07/2016 11:45	AMAR379.9.20160729T114550Z.wav_chan0.xml	0	0
29/07/2016 12:00	AMAR379.9.20160729T120017Z.wav_chan0.xml	0	0
29/07/2016 12:14	AMAR379.9.20160729T121444Z.wav_chan0.xml	0	0
29/07/2016 12:29	AMAR379.9.20160729T122911Z.wav_chan0.xml	0	2
29/07/2016 12:43	AMAR379.9.20160729T124338Z.wav_chan0.xml	2	0
29/07/2016 12:58	AMAR379.9.20160729T125805Z.wav_chan0.xml	3	0
29/07/2016 13:12	AMAR379.9.20160729T131232Z.wav_chan0.xml	0	0
29/07/2016 13:26	AMAR379.9.20160729T132659Z.wav_chan0.xml	0	0
29/07/2016 13:41	AMAR379.9.20160729T134126Z.wav_chan0.xml	0	0
29/07/2016 13:55	AMAR379.9.20160729T135553Z.wav_chan0.xml	0	0
29/07/2016 14:10	AMAR379.9.20160729T141020Z.wav_chan0.xml	0	1
29/07/2016 14:24	AMAR379.9.20160729T142447Z.wav_chan0.xml	0	0
29/07/2016 14:39	AMAR379.9.20160729T143914Z.wav_chan0.xml	0	1
29/07/2016 14:53	AMAR379.9.20160729T145341Z.wav_chan0.xml	0	3
29/07/2016 15:08	AMAR379.9.20160729T150808Z.wav_chan0.xml	0	0
29/07/2016 15:22	AMAR379.9.20160729T152235Z.wav_chan0.xml	0	0
29/07/2016 15:37	AMAR379.9.20160729T153702Z.wav_chan0.xml	0	0
29/07/2016 15:51	AMAR379.9.20160729T155129Z.wav_chan0.xml	0	0
29/07/2016 16:05	AMAR379.9.20160729T160556Z.wav_chan0.xml	0	0
29/07/2016 16:20	AMAR379.9.20160729T162023Z.wav_chan0.xml	0	0
29/07/2016 16:34	AMAR379.9.20160729T163450Z.wav_chan0.xml	0	0
29/07/2016 16:49	AMAR379.9.20160729T164917Z.wav_chan0.xml	0	0
29/07/2016 17:03	AMAR379.9.20160729T170344Z.wav_chan0.xml	0	0
29/07/2016 17:18	AMAR379.9.20160729T171811Z.wav_chan0.xml	1	0
29/07/2016 17:32	AMAR379.9.20160729T173238Z.wav_chan0.xml	0	0
29/07/2016 17:47	AMAR379.9.20160729T174705Z.wav_chan0.xml	0	0
29/07/2016 18:01	AMAR379.9.20160729T180132Z.wav_chan0.xml	0	0
29/07/2016 18:15	AMAR379.9.20160729T181559Z.wav_chan0.xml	0	0
29/07/2016 18:30	AMAR379.9.20160729T183026Z.wav_chan0.xml	0	0
29/07/2016 18:44	AMAR379.9.20160729T184453Z.wav_chan0.xml	0	0
29/07/2016 18:59	AMAR379.9.20160729T185920Z.wav_chan0.xml	0	0
29/07/2016 19:13	AMAR379.9.20160729T191347Z.wav_chan0.xml	0	0
29/07/2016 19:28	AMAR379.9.20160729T192814Z.wav_chan0.xml	0	0
29/07/2016 19:42	AMAR379.9.20160729T194241Z.wav_chan0.xml	0	0
29/07/2016 19:57	AMAR379.9.20160729T195708Z.wav_chan0.xml	0	0
29/07/2016 20:11	AMAR379.9.20160729T201135Z.wav_chan0.xml	0	0
29/07/2016 20:26	AMAR379.9.20160729T202602Z.wav_chan0.xml	0	0
29/07/2016 20:40	AMAR379.9.20160729T204029Z.wav_chan0.xml	0	0
29/07/2016 20:54	AMAR379.9.20160729T205456Z.wav_chan0.xml	0	0
29/07/2016 21:09	AMAR379.9.20160729T210923Z.wav_chan0.xml	0	0
29/07/2016 21:23	AMAR379.9.20160729T212350Z.wav_chan0.xml	0	0
29/07/2016 21:38	AMAR379.9.20160729T213817Z.wav_chan0.xml	0	0
29/07/2016 21:52	AMAR379.9.20160729T215244Z.wav_chan0.xml	0	0
29/07/2016 22:07	AMAR379.9.20160729T220711Z.wav_chan0.xml	0	0
29/07/2016 22:21	AMAR379.9.20160729T222138Z.wav_chan0.xml	0	0
29/07/2016 22:36	AMAR379.9.20160729T223605Z.wav_chan0.xml	0	0
29/07/2016 22:50	AMAR379.9.20160729T225032Z.wav_chan0.xml	0	0
29/07/2016 23:04	AMAR379.9.20160729T230459Z.wav_chan0.xml	0	0
29/07/2016 23:19	AMAR379.9.20160729T231926Z.wav_chan0.xml	0	0
29/07/2016 23:33	AMAR379.9.20160729T233353Z.wav_chan0.xml	0	0
29/07/2016 23:48	AMAR379.9.20160729T234820Z.wav_chan0.xml	0	0
30/07/2016 0:02	AMAR379.9.20160730T000247Z.wav_chan0.xml	0	0
30/07/2016 0:17	AMAR379.9.20160730T001714Z.wav_chan0.xml	1	0
30/07/2016 0:31	AMAR379.9.20160730T003141Z.wav_chan0.xml	0	0
30/07/2016 0:46	AMAR379.9.20160730T004608Z.wav_chan0.xml	0	0
30/07/2016 1:00	AMAR379.9.20160730T010035Z.wav_chan0.xml	0	0
30/07/2016 1:15	AMAR379.9.20160730T011502Z.wav_chan0.xml	0	0
30/07/2016 1:29	AMAR379.9.20160730T012929Z.wav_chan0.xml	0	0
30/07/2016 1:43	AMAR379.9.20160730T014356Z.wav_chan0.xml	0	0
30/07/2016 1:58	AMAR379.9.20160730T015823Z.wav_chan0.xml	0	0
30/07/2016 2:12	AMAR379.9.20160730T021250Z.wav_chan0.xml	0	0
30/07/2016 2:27	AMAR379.9.20160730T022717Z.wav_chan0.xml	0	0
30/07/2016 2:41	AMAR379.9.20160730T024144Z.wav_chan0.xml	0	0
30/07/2016 2:56	AMAR379.9.20160730T025611Z.wav_chan0.xml	0	0
30/07/2016 3:10	AMAR379.9.20160730T031038Z.wav_chan0.xml	0	0
30/07/2016 3:25	AMAR379.9.20160730T032505Z.wav_chan0.xml	0	0
30/07/2016 3:39	AMAR379.9.20160730T033932Z.wav_chan0.xml	0	0
30/07/2016 3:53	AMAR379.9.20160730T035359Z.wav_chan0.xml	0	0
30/07/2016 4:08	AMAR379.9.20160730T040826Z.wav_chan0.xml	0	0
30/07/2016 4:22	AMAR379.9.20160730T042253Z.wav_chan0.xml	0	0
30/07/2016 4:37	AMAR379.9.20160730T043720Z.wav_chan0.xml	0	0
30/07/2016 4:51	AMAR379.9.20160730T045147Z.wav_chan0.xml	0	0
30/07/2016 5:06	AMAR379.9.20160730T050614Z.wav_chan0.xml	0	0
30/07/2016 5:20	AMAR379.9.20160730T052041Z.wav_chan0.xml	0	0
30/07/2016 5:35	AMAR379.9.20160730T053508Z.wav_chan0.xml	0	0
30/07/2016 5:49	AMAR379.9.20160730T054935Z.wav_chan0.xml	0	0
30/07/2016 6:04	AMAR379.9.20160730T060402Z.wav_chan0.xml	0	0
30/07/2016 6:18	AMAR379.9.20160730T061829Z.wav_chan0.xml	0	0
30/07/2016 6:32	AMAR379.9.20160730T063256Z.wav_chan0.xml	0	0
30/07/2016 6:47	AMAR379.9.20160730T064723Z.wav_chan0.xml	0	0
30/07/2016 7:01	AMAR379.9.20160730T070150Z.wav_chan0.xml	0	0
30/07/2016 7:16	AMAR379.9.20160730T071617Z.wav_chan0.xml	0	0
30/07/2016 7:30	AMAR379.9.20160730T073044Z.wav_chan0.xml	0	0
30/07/2016 7:45	AMAR379.9.20160730T074511Z.wav_chan0.xml	0	0
30/07/2016 7:59	AMAR379.9.20160730T075938Z.wav_chan0.xml	0	0
30/07/2016 8:14	AMAR379.9.20160730T081405Z.wav_chan0.xml	0	0
30/07/2016 8:28	AMAR379.9.20160730T082832Z.wav_chan0.xml	0	0
30/07/2016 8:42	AMAR379.9.20160730T084259Z.wav_chan0.xml	0	0
30/07/2016 8:57	AMAR379.9.20160730T085726Z.wav_chan0.xml	0	0
30/07/2016 9:26	AMAR379.9.20160730T092620Z.wav_chan0.xml	0	0
30/07/2016 9:40	AMAR379.9.20160730T094047Z.wav_chan0.xml	0	0
30/07/2016 9:55	AMAR379.9.20160730T095514Z.wav_chan0.xml	0	0
30/07/2016 10:09	AMAR379.9.20160730T100941Z.wav_chan0.xml	0	0
30/07/2016 10:24	AMAR379.9.20160730T102408Z.wav_chan0.xml	0	0
30/07/2016 10:38	AMAR379.9.20160730T103835Z.wav_chan0.xml	0	0
30/07/2016 10:53	AMAR379.9.20160730T105302Z.wav_chan0.xml	0	0
30/07/2016 11:07	AMAR379.9.20160730T110729Z.wav_chan0.xml	0	0
30/07/2016 11:21	AMAR379.9.20160730T112156Z.wav_chan0.xml	0	0
30/07/2016 11:36	AMAR379.9.20160730T113623Z.wav_chan0.xml	0	0
30/07/2016 11:50	AMAR379.9.20160730T115050Z.wav_chan0.xml	0	0
30/07/2016 12:05	AMAR379.9.20160730T120517Z.wav_chan0.xml	0	0
30/07/2016 12:19	AMAR379.9.20160730T121944Z.wav_chan0.xml	0	0
30/07/2016 12:34	AMAR379.9.20160730T123411Z.wav_chan0.xml	0	0
30/07/2016 12:48	AMAR379.9.20160730T124838Z.wav_chan0.xml	0	0
30/07/2016 13:03	AMAR379.9.20160730T130305Z.wav_chan0.xml	8	0
30/07/2016 13:17	AMAR379.9.20160730T131732Z.wav_chan0.xml	0	0
30/07/2016 13:31	AMAR379.9.20160730T133159Z.wav_chan0.xml	0	0
30/07/2016 13:46	AMAR379.9.20160730T134626Z.wav_chan0.xml	0	0
30/07/2016 14:00	AMAR379.9.20160730T140053Z.wav_chan0.xml	0	0
30/07/2016 14:15	AMAR379.9.20160730T141520Z.wav_chan0.xml	0	0
30/07/2016 14:29	AMAR379.9.20160730T142947Z.wav_chan0.xml	0	0
30/07/2016 14:44	AMAR379.9.20160730T144414Z.wav_chan0.xml	0	0
30/07/2016 14:58	AMAR379.9.20160730T145841Z.wav_chan0.xml	0	0
30/07/2016 15:13	AMAR379.9.20160730T151308Z.wav_chan0.xml	0	0
30/07/2016 15:27	AMAR379.9.20160730T152735Z.wav_chan0.xml	0	0
30/07/2016 15:42	AMAR379.9.20160730T154202Z.wav_chan0.xml	0	0
30/07/2016 15:56	AMAR379.9.20160730T155629Z.wav_chan0.xml	0	0
30/07/2016 16:10	AMAR379.9.20160730T161056Z.wav_chan0.xml	0	0
30/07/2016 16:25	AMAR379.9.20160730T162523Z.wav_chan0.xml	0	0
30/07/2016 16:39	AMAR379.9.20160730T163950Z.wav_chan0.xml	7	0
30/07/2016 16:54	AMAR379.9.20160730T165417Z.wav_chan0.xml	0	0
30/07/2016 17:08	AMAR379.9.20160730T170844Z.wav_chan0.xml	0	0
30/07/2016 17:23	AMAR379.9.20160730T172311Z.wav_chan0.xml	0	0
30/07/2016 17:37	AMAR379.9.20160730T173738Z.wav_chan0.xml	0	0
30/07/2016 17:52	AMAR379.9.20160730T175205Z.wav_chan0.xml	0	0
30/07/2016 18:06	AMAR379.9.20160730T180632Z.wav_chan0.xml	0	0
[truncated: 9,422 more rows]
